# Supplementary material for: The cGAS-STING pathway is a master regulator of OCT4 expression in persistent sarcoma cells and enhances cellular immunotherapy with NK and CIK lymphocytes
Source: Research Square preprint supplement (doi:10.21203/rs.3.rs-6463944/v1), 2025-05-02
Supplement: Supplementary file 1 [file 8182dab8e4367b193d5399e9.docx]

**Supplementary Table S1**. List of siRNAs employed for gene silencing

| Silencer | Company and Catalog number |  |
| --- | --- | --- |
| IFNB1  IRF3  IRF9  CTRL | Thermo Fisher Scientific, 144950  Thermo Fisher Scientific, 106517  Thermo Fisher Scientific, 107939  Thermo Fisher Scientific, N#1 |  |
|  |  |  |

**Supplementary Table S2**. List of TaqMan probes employed for qRT-PCR

| Human TaqMan probes | Companies and Catalog |
| --- | --- |
| MICA  MICB | Thermo Fisher Scientific, Hs00792195_m1  Thermo Fisher Scientific, Hs00792952_m1 |
| ULBP2  ULBP3  POU5F1 (OCT4)  TMEM173 (STING1)  TBK1  IRF3  IFNβ  ACTB | Thermo Fisher Scientific, Hs01127964_m1  Thermo Fisher Scientific, Hs00225909_m1  Thermo Fisher Scientific, Hs04260367_gH  Thermo Fisher Scientific, Hs00736955_g1  Thermo Fisher Scientific, Hs00179410_m1  Thermo Fisher Scientific, Hs00155574_m1  Thermo Fisher Scientific, Hs01077958_s1  Thermo Fisher Scientific, Hs03023943_g1 |

**Supplementary Table S3.** List of primers employed for qRT-PCR or q-PCR

| Human genes | Primer sequences |
| --- | --- |
| IFNAR1 | Forward 5’-AGCCCCACTAAACAAAGCAC -3’  Reverse 5’- GCAATCCCCTCAAAGACTGA -3’ |
| IFNAR2 | Forward 5’- CTCACAGTTTGTAAATCTTTTTCCC -3’  Reverse 5’- AGGGAGAAGTGAAAGTGGGAA -3’ |
| GUSB | Forward 5’- CGCTATGGG ATTGTGGTCAT-3’  Reverse 5’- CATGTGGTGATGCAGAGAAA-3’ |
| POU5F1 | Forward 5’- AGCCCCACTAAACAAAGCAC -3’  Reverse 5’- GCAATCCCCTCAAAGACTGA-3’ |

**Supplementary Table S4**. List of antibodies employed for western blot, ChIP, and immunofluorescence

| Antibodies | Company and Catalog number | Application |
| --- | --- | --- |
| IFNAR1  TBK1 | Proteintech, 13083-1-AP  Thermo Fisher Scientific, PA517478 | Western blot  Western blot |
| P-TBK1 (Ser172)  IRF3  P-IRF3 (Ser396)  MICA  MICB  ULBP2  ULBP3  STAT1  P-STAT1(Tyr701)  ACTB  VINCULIN  IRF3  IRF9  IgG  DsDNA | Thermo Fisher Scientific, PA5105919  Thermo Fisher Scientific, PA520087  Thermo Fisher Scientific, #720012  Thermo Fisher Scientific, PA535346  Thermo Fisher Scientific, PA578061  Thermo Fisher Scientific, MA538656  Abcam, ab259988  Cell Signaling Technology, #9172  Cell Signaling Technology, #9167  Cell Signaling Technology, #4970  Cell Signaling Technology, #13901  Cell Signaling Technology, 4302S  Thermo Fisher Scientific, 702322  Diagenode, C15400001-15  Abcam, #ab27156 | Western blot  Western blot  Western blot  Western blot  Western blot  Western blot  Western blot  Western blot  Western blot  Western blot  Western blot  ChIP  ChIP  ChIP  Immunofluorescence |

**Supplementary Table S5**. List of antibodies employed for flow cytometry

| Target | Conjugate | Companies and Catalog |
| --- | --- | --- |
| MICA/B  ULBP2/5/6 | PE  APC | BD Pharminger, 558352  R&D System, FAB1298A |
| ULBP3  CD3  CD8  CD56  CD134 (NKG2D)  CD226 (DNAM1)  OCT4 | PE  FITC  PE  APC  APC  PE  PE | R&D System, FAB1517P  Miltenyi Biotech,130-120-267  Miltenyi Biotech, 130-110-678  Miltenyi Biotech, 130-113-305  Miltenyi Biotech, 130-098-844  BD Pharmingen, 567358  Miltenyi Biotech, REA338 |
