# Supplementary material for: The cGAS-STING pathway is a master regulator of OCT4 expression in persistent sarcoma cells and enhances cellular immunotherapy with NK and CIK lymphocytes
Source: Research Square preprint supplement (doi:10.21203/rs.3.rs-6463944/v1), 2025-05-02
Supplement: Supplementary file 2 [file c814d62fca1b6737378d120a.xlsx]

## Sheet: Annotation
Supplementary Table S7. Metascape Enrichment analysis. The first sheet contains the annotations for the analyzed DE genes, while the second, third, and fourth sheets display the enriched terms for all DE genes, and separately for those that are upregulated or downregulated by the treatments."
Gene	original_id	DMR	HT-1080	S018	Gene ID	Type	Tax ID	Homologene Gene ID	Homologene Gene Tax ID	Gene Symbol	Description	Biological Process (GO)	Kinase Class (UniProt)	Protein Function (Protein Atlas)	Subcellular Location (Protein Atlas)	Drug (DrugBank)	Canonical Pathways	Hallmark Gene Sets	R-HSA-2262752 Cellular responses to stress	GO:0006974 cellular response to DNA damag	WP4286 Genotoxicity pathway	GO:0043043 peptide biosynthetic process	R-HSA-5693532 DNA Double-Strand Break Repair	R-HSA-69278 Cell Cycle, Mitotic	GO:0043038 amino acid activation	GO:0034660 ncRNA metabolic process	CORUM:3740 SKI-SMAD3-SMAD4 complex	GO:0043112 receptor metabolic process	ko04142 Lysosome	R-HSA-8953854 Metabolism of RNA	R-HSA-381119 Unfolded Protein Response (UPR	WP4535 Envelope proteins and their po	GO:1904951 positive regulation of establi	GO:0007264 small GTPase mediated signal t	WP4753 Nucleotide excision repair	GO:0001889 liver development	GO:0043414 macromolecule methylation	GO:1990928 response to amino acid starvat	TotalEvidenceCount
11334	TUSC2	1	0	1	11334	Gene_ID	H. sapiens	11334	H. sapiens	TUSC2	tumor suppressor 2, mitochondrial calcium regulator	GO:0070945 neutrophil-mediated killing of gram-negative bacterium;GO:0070944 neutrophil-mediated killing of bacterium;GO:0070943 neutrophil-mediated killing of symbiont cell		Predicted intracellular proteins; Cancer-related genes:Candidate cancer biomarkers	Cytosol (Approved); Additional: Vesicles				0	0	0	0	1	0	0	0	0	0	0	0	0	0	0	0	0	1	0	0	1
57169	ZNFX1	1	0	1	57169	Gene_ID	H. sapiens	57169	H. sapiens	ZNFX1	zinc finger NFX1-type containing 1	GO:0031048 heterochromatin assembly by small RNA;GO:0031507 heterochromatin assembly;GO:0070828 heterochromatin organization		Predicted intracellular proteins; Transcription factors:Yet undefined DNA-binding domains	Mitochondria (Approved)		(M105)PID TELOMERASE PATHWAY	(M5913)HALLMARK INTERFERON GAMMA RESPONSE	0	0	0	0	1	0	0	0	0	0	0	0	0	0	0	0	0	0	0	0	1
116151	FAM210B	1	0	1	116151	Gene_ID	H. sapiens	116151	H. sapiens	FAM210B	family with sequence similarity 210 member B	GO:0043249 erythrocyte maturation;GO:0045648 positive regulation of erythrocyte differentiation;GO:0048821 erythrocyte development		Predicted intracellular proteins	Cytosol;Plasma membrane (Approved)				0	0	0	0	0	0	0	0	0	0	0	0	0	0	0	0	0	0	0	0	1
10346	TRIM22	1	0	1	10346	Gene_ID	H. sapiens	10346	H. sapiens	TRIM22	tripartite motif containing 22	GO:0046596 regulation of viral entry into host cell;GO:0052372 modulation by symbiont of entry into host;GO:0043903 regulation of biological process involved in symbiotic interaction		Predicted intracellular proteins; Enzymes; ENZYME proteins:Transferases	Nuclear bodies;Nucleoplasm (Supported)				0	0	1	0	0	0	0	0	0	0	0	0	0	0	0	0	0	0	0	0	1
92840	REEP6	1	1	0	92840	Gene_ID	H. sapiens	92840	H. sapiens	REEP6	receptor accessory protein 6	GO:0050908 detection of light stimulus involved in visual perception;GO:0050962 detection of light stimulus involved in sensory perception;GO:0009584 detection of visible light		Disease related genes	Endoplasmic reticulum (Supported)			(M5935)HALLMARK FATTY ACID METABOLISM; (M5905)HALLMARK ADIPOGENESIS	0	0	0	0	0	0	0	0	0	0	0	0	0	0	1	0	0	0	0	0	1
2232	FDXR	1	0	1	2232	Gene_ID	H. sapiens	2232	H. sapiens	FDXR	ferredoxin reductase	GO:0006744 ubiquinone biosynthetic process;GO:1901663 quinone biosynthetic process;GO:0006743 ubiquinone metabolic process		Disease related genes; Predicted intracellular proteins; ENZYME proteins:Oxidoreductases; Potential drug targets; Enzymes	Mitochondria (Enhanced)	Flavin adenine dinucleotide; Nicotinamide adenine dinucleotide phosphate	(M256)PID TAP63 PATHWAY; (M145)PID P53 DOWNSTREAM PATHWAY	(M5948)HALLMARK BILE ACID METABOLISM; (M5902)HALLMARK APOPTOSIS; (M5924)HALLMARK MTORC1 SIGNALING	0	0	0	0	0	0	0	0	0	0	0	0	0	0	0	0	0	0	0	0	1
8358	H3C2	1	0	1	8358	Gene_ID	H. sapiens	8358	H. sapiens	H3C2	H3 clustered histone 2	GO:0006335 DNA replication-dependent nucleosome assembly;GO:0034723 DNA replication-dependent nucleosome organization;GO:0060968 regulation of gene silencing							1	0	0	0	1	1	0	0	0	0	0	0	0	0	0	0	0	0	0	0	1
4043	LRPAP1	1	0	1	4043	Gene_ID	H. sapiens	4043	H. sapiens	LRPAP1	LDL receptor related protein associated protein 1	GO:0010916 negative regulation of very-low-density lipoprotein particle clearance;GO:0010915 regulation of very-low-density lipoprotein particle clearance;GO:0034447 very-low-density lipoprotein particle clearance		Predicted intracellular proteins; Disease related genes	Endoplasmic reticulum (Supported)		(M211)PID HEDGEHOG 2PATHWAY; (M69)PID REELIN PATHWAY; (M163)PID LIS1 PATHWAY	(M5944)HALLMARK ANGIOGENESIS	0	0	0	0	0	0	0	0	0	1	0	0	0	0	0	0	0	0	0	0	1
408	ARRB1	1	0	1	408	Gene_ID	H. sapiens	408	H. sapiens	ARRB1	arrestin beta 1	GO:0042699 follicle-stimulating hormone signaling pathway;GO:0090240 positive regulation of histone H4 acetylation;GO:0090239 regulation of histone H4 acetylation		Predicted intracellular proteins	Nucleoplasm (Supported)		(M252)PID IL8 CXCR1 PATHWAY; (M210)PID IL8 CXCR2 PATHWAY; (M86)PID ARF6 PATHWAY	(M5903)HALLMARK NOTCH SIGNALING	0	0	0	0	1	0	0	0	0	1	0	0	0	1	0	1	0	1	0	0	1
10978	CLP1	1	0	1	10978	Gene_ID	H. sapiens	10978	H. sapiens	CLP1	cleavage factor polyribonucleotide kinase subunit 1	GO:0030423 targeting of mRNA for destruction involved in RNA interference;GO:0035087 siRNA loading onto RISC involved in RNA interference;GO:0070922 small RNA loading onto RISC		Disease related genes; ENZYME proteins:Transferases; Predicted intracellular proteins; Potential drug targets; Enzymes	Nucleoplasm (Supported)			(M5898)HALLMARK DNA REPAIR	0	0	0	0	0	0	1	1	0	0	0	1	0	0	0	0	0	0	0	0	1
100419041	SNX18P12	1	0	1	100419041	Gene_ID	H. sapiens	100419041	H. sapiens	SNX18P12	sorting nexin 18 pseudogene 12								0	0	0	0	0	0	0	0	0	0	0	0	0	0	0	0	0	0	0	0	1
59	ACTA2	1	0	1	59	Gene_ID	H. sapiens	59	H. sapiens	ACTA2	actin alpha 2, smooth muscle	GO:0090131 mesenchyme migration;GO:0072144 glomerular mesangial cell development;GO:0072008 glomerular mesangial cell differentiation		Predicted intracellular proteins; Disease related genes	Actin filaments (Supported)	Phenethyl Isothiocyanate	(M186)PID PDGFRB PATHWAY	(M5930)HALLMARK EPITHELIAL MESENCHYMAL TRANSITION	0	0	1	0	1	0	0	0	1	0	0	0	0	1	0	0	0	1	0	0	1
26233	FBXL6	1	0	1	26233	Gene_ID	H. sapiens	26233	H. sapiens	FBXL6	F-box and leucine rich repeat protein 6	GO:0043153 entrainment of circadian clock by photoperiod;GO:0009648 photoperiodism;GO:0009649 entrainment of circadian clock		Predicted intracellular proteins	Nucleoplasm (Approved); Additional: Vesicles				0	0	0	0	0	0	0	0	0	0	0	0	0	0	0	0	0	0	0	0	1
2517	FUCA1	1	1	0	2517	Gene_ID	H. sapiens	2517	H. sapiens	FUCA1	alpha-L-fucosidase 1	GO:0016139 glycoside catabolic process;GO:0006004 fucose metabolic process;GO:0019377 glycolipid catabolic process		Disease related genes; Predicted intracellular proteins; Potential drug targets; ENZYME proteins:Hydrolases; Enzymes				(M5930)HALLMARK EPITHELIAL MESENCHYMAL TRANSITION; (M5939)HALLMARK P53 PATHWAY; (M5953)HALLMARK KRAS SIGNALING UP	0	0	0	0	0	0	0	0	0	0	1	0	0	0	0	0	0	0	0	0	1
51768	TM7SF3	1	0	1	51768	Gene_ID	H. sapiens	51768	H. sapiens	TM7SF3	transmembrane 7 superfamily member 3	GO:0032024 positive regulation of insulin secretion;GO:0034620 cellular response to unfolded protein;GO:0090277 positive regulation of peptide hormone secretion		Predicted intracellular proteins	Cytosol (Supported); Additional: Nucleoplasm			(M5939)HALLMARK P53 PATHWAY	0	0	1	0	0	0	0	0	0	0	0	0	1	0	1	0	0	0	0	0	1
11173	ADAMTS7	1	0	1	11173	Gene_ID	H. sapiens	11173	H. sapiens	ADAMTS7	ADAM metallopeptidase with thrombospondin type 1 motif 7	GO:0032331 negative regulation of chondrocyte differentiation;GO:0061037 negative regulation of cartilage development;GO:0032330 regulation of chondrocyte differentiation		Predicted secreted proteins	Vesicles (Supported)		(M3468)NABA ECM REGULATORS; (M5885)NABA MATRISOME ASSOCIATED; (M5889)NABA MATRISOME		0	0	0	0	0	0	0	0	0	0	0	0	0	0	0	0	0	1	0	0	1
784	CACNB3	1	0	1	784	Gene_ID	H. sapiens	784	H. sapiens	CACNB3	calcium voltage-gated channel auxiliary subunit beta 3	GO:1905787 regulation of detection of mechanical stimulus involved in sensory perception of touch;GO:1905788 negative regulation of detection of mechanical stimulus involved in sensory perception of touch;GO:0050976 detection of mechanical stimulus involved in sensory perception of touch		FDA approved drug targets:Small molecule drugs; Predicted intracellular proteins; Transporters:Accessory Factors Involved in Transport	Golgi apparatus;Vesicles (Approved)	Nimodipine; Mibefradil; Dronedarone			0	0	0	0	0	0	0	0	0	0	0	0	0	1	1	0	0	0	0	1	1
94241	TP53INP1	1	0	1	94241	Gene_ID	H. sapiens	94241	H. sapiens	TP53INP1	tumor protein p53 inducible nuclear protein 1	GO:0072702 response to methyl methanesulfonate;GO:0072703 cellular response to methyl methanesulfonate;GO:1904761 negative regulation of myofibroblast differentiation		Predicted intracellular proteins	Cytosol (Supported)		(M145)PID P53 DOWNSTREAM PATHWAY	(M5892)HALLMARK CHOLESTEROL HOMEOSTASIS	0	0	0	0	0	0	0	0	0	0	0	0	0	1	0	0	0	0	0	0	1
80162	PGGHG	1	0	1	80162	Gene_ID	H. sapiens	80162	H. sapiens	PGGHG	protein-glucosylgalactosylhydroxylysine glucosidase	GO:0005975 carbohydrate metabolic process;GO:0044238 primary metabolic process;GO:0071704 organic substance metabolic process		Predicted intracellular proteins; Enzymes; ENZYME proteins:Hydrolases	Cytosol (Enhanced)				0	0	0	0	0	0	0	0	0	0	0	0	0	0	0	0	0	0	0	0	1
101928483	NALT1	1	0	1	101928483	Gene_ID	H. sapiens	101928483	H. sapiens	NALT1	NOTCH1 associated lncRNA in T cell acute lymphoblastic leukemia 1								0	0	0	0	0	0	0	0	0	0	0	0	0	0	0	0	0	0	0	0	1
8603	FAM193A	0	0	1	8603	Gene_ID	H. sapiens	8603	H. sapiens	FAM193A	family with sequence similarity 193 member A			Predicted intracellular proteins	Cytosol;Plasma membrane (Approved)				0	0	0	0	0	0	0	0	0	0	0	0	0	0	0	0	0	0	0	0	0
22884	WDR37	0	0	1	22884	Gene_ID	H. sapiens	22884	H. sapiens	WDR37	WD repeat domain 37			Predicted intracellular proteins	Intermediate filaments (Approved)			(M5942)HALLMARK UV RESPONSE DN	0	0	0	0	0	0	0	0	0	0	0	0	0	0	0	0	0	0	0	0	0
10838	ZNF275	0	0	1	10838	Gene_ID	H. sapiens	10838	H. sapiens	ZNF275	zinc finger protein 275	GO:0006357 regulation of transcription by RNA polymerase II;GO:0006366 transcription by RNA polymerase II;GO:0006355 regulation of transcription, DNA-templated		Transcription factors:Zinc-coordinating DNA-binding domains; Predicted intracellular proteins	Nucleoli (Approved)				0	0	0	0	0	0	0	0	0	0	0	0	0	0	0	0	0	0	0	0	0
6988	TCTA	1	0	0	6988	Gene_ID	H. sapiens	6988	H. sapiens	TCTA	T cell leukemia translocation altered	GO:0072675 osteoclast fusion;GO:0072674 multinuclear osteoclast differentiation;GO:0045671 negative regulation of osteoclast differentiation		Disease related genes	Cytosol (Approved)				0	0	0	0	0	0	0	0	0	0	0	0	0	0	0	0	0	0	0	0	1
8844	KSR1	0	0	1	8844	Gene_ID	H. sapiens	8844	H. sapiens	KSR1	kinase suppressor of ras 1	GO:0019933 cAMP-mediated signaling;GO:0019935 cyclic-nucleotide-mediated signaling;GO:0043405 regulation of MAP kinase activity	TKL Ser/Thr protein kinase family	Predicted intracellular proteins; Kinases:TKL Ser/Thr protein kinases; Enzymes; RAS pathway related proteins			(M144)PID CERAMIDE PATHWAY; (M164)PID ERBB1 DOWNSTREAM PATHWAY; (M186)PID PDGFRB PATHWAY		0	0	0	0	0	0	0	0	0	0	0	0	0	1	0	1	0	0	0	0	0
65095	KRI1	0	0	1	65095	Gene_ID	H. sapiens	65095	H. sapiens	KRI1	KRI1 homolog	GO:0000447 endonucleolytic cleavage in ITS1 to separate SSU-rRNA from 5.8S rRNA and LSU-rRNA from tricistronic rRNA transcript (SSU-rRNA, 5.8S rRNA, LSU-rRNA);GO:0000478 endonucleolytic cleavage involved in rRNA processing;GO:0000479 endonucleolytic cleavage of tricistronic rRNA transcript (SSU-rRNA, 5.8S rRNA, LSU-rRNA)		Predicted intracellular proteins	Nucleoli (Enhanced)				0	0	0	0	0	0	0	1	0	0	0	0	0	0	0	0	0	0	0	0	0
127687	C1orf122	1	0	0	127687	Gene_ID	H. sapiens	127687	H. sapiens	C1orf122	chromosome 1 open reading frame 122			Predicted intracellular proteins					0	0	0	0	0	0	0	0	0	0	0	0	0	0	0	0	0	0	0	0	1
51406	NOL7	0	0	1	51406	Gene_ID	H. sapiens	51406	H. sapiens	NOL7	nucleolar protein 7			Predicted intracellular proteins	Mitotic chromosome;Nucleoli (Supported); Additional: Mitochondria				0	0	0	0	0	0	0	0	0	0	0	0	0	0	0	0	0	0	0	0	0
114327	EFHC1	0	0	1	114327	Gene_ID	H. sapiens	114327	H. sapiens	EFHC1	EF-hand domain containing 1	GO:0021795 cerebral cortex cell migration;GO:0022029 telencephalon cell migration;GO:0021885 forebrain cell migration		Predicted intracellular proteins; Disease related genes				(M5948)HALLMARK BILE ACID METABOLISM	0	0	0	0	0	0	0	0	0	0	0	0	0	0	0	0	0	0	0	0	0
25901	CCDC28A	0	0	1	25901	Gene_ID	H. sapiens	25901	H. sapiens	CCDC28A	coiled-coil domain containing 28A			Predicted intracellular proteins; Disease related genes	Plasma membrane (Approved); Additional: Nucleoplasm			(M5945)HALLMARK HEME METABOLISM	0	0	0	0	0	0	0	0	0	0	0	0	0	0	0	0	0	0	0	0	0
256586	LYSMD2	0	0	1	256586	Gene_ID	H. sapiens	256586	H. sapiens	LYSMD2	LysM domain containing 2			Predicted intracellular proteins	Mitochondria (Approved); Additional: Nuclear bodies			(M5913)HALLMARK INTERFERON GAMMA RESPONSE	0	0	0	0	0	0	0	0	0	0	0	0	0	0	0	0	0	0	0	0	0
51001	MTERF3	0	0	1	51001	Gene_ID	H. sapiens	51001	H. sapiens	MTERF3	mitochondrial transcription termination factor 3	GO:0061668 mitochondrial ribosome assembly;GO:0042255 ribosome assembly;GO:0042254 ribosome biogenesis		Predicted intracellular proteins	Mitochondria (Supported); Additional: Cytosol				0	0	0	0	0	0	0	1	0	0	0	0	0	0	0	0	0	0	0	0	0
55355	HJURP	1	0	0	55355	Gene_ID	H. sapiens	55355	H. sapiens	HJURP	Holliday junction recognition protein	GO:0034080 CENP-A containing nucleosome assembly;GO:0061641 CENP-A containing chromatin organization;GO:0031055 chromatin remodeling at centromere		Predicted intracellular proteins	Nucleoli;Nucleoli rim;Nucleoplasm (Enhanced); Additional: Mitochondria				0	0	0	0	1	1	0	0	0	0	0	0	0	0	0	0	0	0	0	0	1
23412	COMMD3	0	0	1	23412	Gene_ID	H. sapiens	23412	H. sapiens	COMMD3	COMM domain containing 3	GO:0006814 sodium ion transport;GO:0030001 metal ion transport;GO:0006812 cation transport		Predicted intracellular proteins					0	0	0	0	0	0	0	0	0	0	0	0	0	0	0	0	0	0	0	0	0
57826	RAP2C	0	0	1	57826	Gene_ID	H. sapiens	57826	H. sapiens	RAP2C	RAP2C, member of RAS oncogene family	GO:0032486 Rap protein signal transduction;GO:0090557 establishment of endothelial intestinal barrier;GO:0030033 microvillus assembly		Predicted intracellular proteins					0	0	0	0	0	0	0	0	0	0	0	0	0	0	0	1	0	0	0	0	0
7508	XPC	1	0	0	7508	Gene_ID	H. sapiens	7508	H. sapiens	XPC	XPC complex subunit, DNA damage recognition and repair factor	GO:1990731 UV-damage excision repair, DNA incision;GO:0000715 nucleotide-excision repair, DNA damage recognition;GO:0000720 pyrimidine dimer repair by nucleotide-excision repair		Predicted intracellular proteins; Disease related genes; Cancer-related genes:Candidate cancer biomarkers	Nucleoplasm (Enhanced); Additional: Plasma membrane			(M5898)HALLMARK DNA REPAIR; (M5939)HALLMARK P53 PATHWAY	0	1	0	0	1	0	0	0	0	0	0	0	0	0	0	0	1	0	0	0	1
2738	GLI4	1	0	0	2738	Gene_ID	H. sapiens	2738	H. sapiens	GLI4	GLI family zinc finger 4	GO:0006357 regulation of transcription by RNA polymerase II;GO:0006366 transcription by RNA polymerase II;GO:0006355 regulation of transcription, DNA-templated		Transcription factors:Zinc-coordinating DNA-binding domains; Predicted intracellular proteins	Cytokinetic bridge;Nucleoplasm (Approved)				0	0	0	0	0	0	0	0	0	0	0	0	0	0	0	0	0	0	0	0	1
5875	RABGGTA	1	0	0	5875	Gene_ID	H. sapiens	5875	H. sapiens	RABGGTA	Rab geranylgeranyltransferase subunit alpha	GO:0018344 protein geranylgeranylation;GO:0018342 protein prenylation;GO:0097354 prenylation		Predicted intracellular proteins; Enzymes; ENZYME proteins:Transferases	Nucleoplasm (Enhanced)	N-Formylmethionine; Farnesyl diphosphate; Geranylgeranyl diphosphate	(M11)PID PRL SIGNALING EVENTS PATHWAY		0	0	0	0	0	0	0	0	0	0	0	0	0	0	0	0	0	0	0	0	1
10723	SLC12A7	0	0	1	10723	Gene_ID	H. sapiens	10723	H. sapiens	SLC12A7	solute carrier family 12 member 7	GO:0140157 ammonium import across plasma membrane;GO:0015696 ammonium transport;GO:0072488 ammonium transmembrane transport		Transporters:Electrochemical Potential-driven transporters	Cytosol (Uncertain)	Potassium chloride			0	0	0	0	0	0	0	0	0	0	0	0	0	0	0	0	0	0	0	0	0
6497	SKI	0	0	1	6497	Gene_ID	H. sapiens	6497	H. sapiens	SKI	SKI proto-oncogene	GO:0043585 nose morphogenesis;GO:0010626 negative regulation of Schwann cell proliferation;GO:0031064 negative regulation of histone deacetylation		Predicted intracellular proteins; Disease related genes	Nuclear bodies;Nucleoplasm (Supported)		(M181)PID BMP PATHWAY; (M2)PID SMAD2 3NUCLEAR PATHWAY; (M195)PID CMYB PATHWAY	(M5896)HALLMARK TGF BETA SIGNALING	0	0	0	0	0	0	0	0	1	0	0	0	0	0	0	1	0	0	0	0	0
837	CASP4	0	0	1	837	Gene_ID	H. sapiens	837	H. sapiens	CASP4	caspase 4	GO:1903265 positive regulation of tumor necrosis factor-mediated signaling pathway;GO:0070269 pyroptosis;GO:0016540 protein autoprocessing		Predicted intracellular proteins; Peptidases:Cysteine-type peptidases; ENZYME proteins:Hydrolases; Cancer-related genes:Candidate cancer biomarkers; Enzymes	Cytosol (Approved); Additional: Plasma membrane	Incadronic acid	(M220)PID CASPASE PATHWAY	(M5902)HALLMARK APOPTOSIS; (M5913)HALLMARK INTERFERON GAMMA RESPONSE; (M5921)HALLMARK COMPLEMENT	0	0	0	0	0	0	0	0	0	0	0	0	1	0	0	0	0	0	0	0	0
4189	DNAJB9	0	0	1	4189	Gene_ID	H. sapiens	4189	H. sapiens	DNAJB9	DnaJ heat shock protein family (Hsp40) member B9	GO:1903895 negative regulation of IRE1-mediated unfolded protein response;GO:1903894 regulation of IRE1-mediated unfolded protein response;GO:1900102 negative regulation of endoplasmic reticulum unfolded protein response		Predicted intracellular proteins	Cytosol;Endoplasmic reticulum (Approved)			(M5908)HALLMARK ANDROGEN RESPONSE; (M5922)HALLMARK UNFOLDED PROTEIN RESPONSE; (M5905)HALLMARK ADIPOGENESIS	1	1	0	0	0	0	0	0	0	0	0	0	1	0	0	0	0	0	0	0	0
144245	ALG10B	0	0	1	144245	Gene_ID	H. sapiens	144245	H. sapiens	ALG10B	ALG10 alpha-1,2-glucosyltransferase B	GO:1901980 positive regulation of inward rectifier potassium channel activity;GO:1901979 regulation of inward rectifier potassium channel activity;GO:0060050 positive regulation of protein glycosylation		Enzymes; ENZYME proteins:Transferases	Endoplasmic reticulum (Approved)				0	0	0	0	0	0	0	0	0	0	0	0	0	0	0	0	0	0	0	0	0
55166	CENPQ	0	0	1	55166	Gene_ID	H. sapiens	55166	H. sapiens	CENPQ	centromere protein Q	GO:1905340 regulation of protein localization to kinetochore;GO:1905342 positive regulation of protein localization to kinetochore;GO:0034501 protein localization to kinetochore		Predicted intracellular proteins	Nucleoplasm (Supported)				0	0	0	0	1	1	0	0	0	0	0	0	0	0	1	0	0	0	0	0	0
23295	MGRN1	0	0	1	23295	Gene_ID	H. sapiens	23295	H. sapiens	MGRN1	mahogunin ring finger 1	GO:0043951 negative regulation of cAMP-mediated signaling;GO:0045879 negative regulation of smoothened signaling pathway;GO:0043949 regulation of cAMP-mediated signaling		Predicted intracellular proteins; Enzymes; ENZYME proteins:Transferases	Vesicles (Supported); Additional: Endoplasmic reticulum				0	0	0	0	0	0	0	0	0	1	0	0	0	0	0	0	0	0	0	0	0
339201	ASB16-AS1	1	0	0	339201	Gene_ID	H. sapiens	339201	H. sapiens	ASB16-AS1	ASB16 antisense RNA 1								0	0	0	0	0	0	0	0	0	0	0	0	0	0	0	0	0	0	0	0	1
55288	RHOT1	0	0	1	55288	Gene_ID	H. sapiens	55288	H. sapiens	RHOT1	ras homolog family member T1	GO:0034640 establishment of mitochondrion localization by microtubule attachment;GO:0099098 microtubule polymerization based movement;GO:1902513 regulation of organelle transport along microtubule		Predicted intracellular proteins				(M5936)HALLMARK OXIDATIVE PHOSPHORYLATION	0	0	0	0	1	1	0	0	0	0	0	0	0	1	1	1	0	0	0	0	0
55631	LRRC40	0	0	1	55631	Gene_ID	H. sapiens	55631	H. sapiens	LRRC40	leucine rich repeat containing 40	GO:0006470 protein dephosphorylation;GO:0016311 dephosphorylation;GO:0006796 phosphate-containing compound metabolic process		Predicted intracellular proteins	Nucleoli (Approved)				0	0	0	0	0	0	0	0	0	0	0	0	0	0	0	0	0	0	0	0	0
29902	FAM216A	0	0	1	29902	Gene_ID	H. sapiens	29902	H. sapiens	FAM216A	family with sequence similarity 216 member A			Predicted intracellular proteins	Actin filaments (Approved)				0	0	0	0	0	0	0	0	0	0	0	0	0	0	0	0	0	0	0	0	0
219	ALDH1B1	1	0	0	219	Gene_ID	H. sapiens	219	H. sapiens	ALDH1B1	aldehyde dehydrogenase 1 family member B1	GO:0006068 ethanol catabolic process;GO:0034310 primary alcohol catabolic process;GO:0006067 ethanol metabolic process		ENZYME proteins:Oxidoreductases; Predicted intracellular proteins; Enzymes	Mitochondria (Supported); Additional: Cytosol;Nucleoplasm;Vesicles	NADH			0	0	0	0	0	0	0	0	0	0	0	0	0	0	0	0	0	0	0	0	1
8036	SHOC2	0	0	1	8036	Gene_ID	H. sapiens	8036	H. sapiens	SHOC2	SHOC2 leucine rich repeat scaffold protein	GO:0046579 positive regulation of Ras protein signal transduction;GO:0051057 positive regulation of small GTPase mediated signal transduction;GO:0008543 fibroblast growth factor receptor signaling pathway		Predicted intracellular proteins; Disease related genes; RAS pathway related proteins	Cytosol;Nucleoplasm (Approved)				0	0	0	0	0	0	0	0	0	0	0	0	0	1	0	1	0	0	0	0	0
339044	PKD1P1	0	0	1	339044	Gene_ID	H. sapiens	339044	H. sapiens	PKD1P1	polycystin 1, transient receptor potential channel interacting pseudogene 1								0	0	0	0	0	0	0	0	0	0	0	0	0	0	0	0	0	0	0	0	0
91749	MFSD4B	1	0	0	91749	Gene_ID	H. sapiens	91749	H. sapiens	MFSD4B	major facilitator superfamily domain containing 4B	GO:1904659 glucose transmembrane transport;GO:0008645 hexose transmembrane transport;GO:0015749 monosaccharide transmembrane transport							0	0	0	0	0	0	0	0	0	0	0	0	0	0	0	0	0	0	0	0	1
79009	DDX50	0	0	1	79009	Gene_ID	H. sapiens	79009	H. sapiens	DDX50	DExD-box helicase 50			Predicted intracellular proteins; Enzymes; ENZYME proteins:Hydrolases	Nucleoli (Enhanced)				0	0	0	0	0	0	0	0	0	0	0	0	0	0	0	0	0	0	0	0	0
80774	LIMD2	0	0	1	80774	Gene_ID	H. sapiens	80774	H. sapiens	LIMD2	LIM domain containing 2			Predicted intracellular proteins	Nucleoplasm (Supported); Additional: Cytosol				0	0	0	0	0	0	0	0	0	0	0	0	0	0	0	0	0	0	0	0	0
145282	MIPOL1	0	0	1	145282	Gene_ID	H. sapiens	145282	H. sapiens	MIPOL1	mirror-image polydactyly 1			Predicted intracellular proteins; Disease related genes	Cytosol (Approved)				0	0	0	0	0	0	0	0	0	0	0	0	0	0	0	0	0	0	0	0	0
53354	PANK1	1	0	0	53354	Gene_ID	H. sapiens	53354	H. sapiens	PANK1	pantothenate kinase 1	GO:0015937 coenzyme A biosynthetic process;GO:0015936 coenzyme A metabolic process;GO:0033866 nucleoside bisphosphate biosynthetic process		Predicted intracellular proteins; Enzymes; ENZYME proteins:Transferases					0	0	0	0	0	0	0	0	0	0	0	0	0	0	0	0	0	0	0	0	1
10155	TRIM28	0	0	1	10155	Gene_ID	H. sapiens	10155	H. sapiens	TRIM28	tripartite motif containing 28	GO:1901536 negative regulation of DNA demethylation;GO:2000653 regulation of genetic imprinting;GO:0060028 convergent extension involved in axis elongation		Predicted intracellular proteins; Enzymes; ENZYME proteins:Transferases	Nucleoplasm (Enhanced)		(M84)PID ATM PATHWAY; (M261)PID P53 REGULATION PATHWAY; (M40)PID E2F PATHWAY	(M5926)HALLMARK MYC TARGETS V1	0	1	0	0	1	0	0	0	0	0	0	0	0	0	1	1	0	0	1	0	0
11222	MRPL3	0	0	1	11222	Gene_ID	H. sapiens	11222	H. sapiens	MRPL3	mitochondrial ribosomal protein L3	GO:0006412 translation;GO:0043043 peptide biosynthetic process;GO:0043604 amide biosynthetic process		Ribosomal proteins; Predicted intracellular proteins; Disease related genes				(M5950)HALLMARK ALLOGRAFT REJECTION	0	0	0	1	0	0	0	0	0	0	0	0	0	0	0	0	0	0	0	0	0
10929	SRSF8	1	0	0	10929	Gene_ID	H. sapiens	10929	H. sapiens	SRSF8	serine and arginine rich splicing factor 8	GO:0000377 RNA splicing, via transesterification reactions with bulged adenosine as nucleophile;GO:0000398 mRNA splicing, via spliceosome;GO:0000375 RNA splicing, via transesterification reactions		Predicted intracellular proteins	Nucleoplasm (Supported); Additional: Cytosol				0	0	0	0	0	0	0	0	0	0	0	0	0	0	0	0	0	0	0	0	1
84552	PARD6G	0	0	1	84552	Gene_ID	H. sapiens	84552	H. sapiens	PARD6G	par-6 family cell polarity regulator gamma	GO:0007098 centrosome cycle;GO:0031023 microtubule organizing center organization;GO:0007163 establishment or maintenance of cell polarity		Predicted intracellular proteins	Plasma membrane (Approved)			(M5915)HALLMARK APICAL JUNCTION	0	0	0	0	0	0	0	0	0	0	0	0	0	0	0	0	0	0	0	0	0
6687	SPG7	0	0	1	6687	Gene_ID	H. sapiens	6687	H. sapiens	SPG7	SPG7 matrix AAA peptidase subunit, paraplegin	GO:0034982 mitochondrial protein processing;GO:1902686 mitochondrial outer membrane permeabilization involved in programmed cell death;GO:0035794 positive regulation of mitochondrial membrane permeability		Disease related genes; Predicted intracellular proteins; Potential drug targets; Peptidases:Metallopeptidases; Enzymes					0	0	0	0	0	0	0	0	0	0	0	0	0	0	0	0	0	0	0	0	0
83591	THAP2	0	0	1	83591	Gene_ID	H. sapiens	83591	H. sapiens	THAP2	THAP domain containing 2			Transcription factors:Zinc-coordinating DNA-binding domains; Predicted intracellular proteins	Golgi apparatus (Approved); Additional: Nucleoplasm				0	0	0	0	0	0	0	0	0	0	0	0	0	0	0	0	0	0	0	0	0
10501	SEMA6B	0	0	1	10501	Gene_ID	H. sapiens	10501	H. sapiens	SEMA6B	semaphorin 6B	GO:0048843 negative regulation of axon extension involved in axon guidance;GO:0048841 regulation of axon extension involved in axon guidance;GO:0048846 axon extension involved in axon guidance					(M5880)NABA ECM AFFILIATED; (M5885)NABA MATRISOME ASSOCIATED; (M5889)NABA MATRISOME		0	0	0	0	0	0	0	0	0	0	0	0	0	0	0	0	0	0	0	0	0
728340	GTF2H2C	0	0	1	728340	Gene_ID	H. sapiens	728340	H. sapiens	GTF2H2C	GTF2H2 family member C	GO:0006289 nucleotide-excision repair;GO:0006281 DNA repair;GO:0006974 cellular response to DNA damage stimulus		Predicted intracellular proteins	Nuclear speckles (Approved)				0	1	0	0	1	0	0	0	0	0	0	0	0	0	0	0	1	0	0	0	0
4893	NRAS	0	0	1	4893	Gene_ID	H. sapiens	4893	H. sapiens	NRAS	NRAS proto-oncogene, GTPase	GO:0001938 positive regulation of endothelial cell proliferation;GO:0001936 regulation of endothelial cell proliferation;GO:0001935 endothelial cell proliferation		Disease related genes; Predicted intracellular proteins; RAS pathway related proteins; Cancer-related genes:Mutational cancer driver genes; Cancer-related genes:Mutated cancer genes	Plasma membrane (Supported)		(M134)PID TCR RAS PATHWAY; (M269)PID RAS PATHWAY; (M270)PID MAPK TRK PATHWAY		0	0	0	0	1	0	0	0	1	0	0	0	0	1	0	1	0	0	0	0	0
51109	RDH11	0	0	1	51109	Gene_ID	H. sapiens	51109	H. sapiens	RDH11	retinol dehydrogenase 11	GO:0110095 cellular detoxification of aldehyde;GO:0110096 cellular response to aldehyde;GO:0042574 retinal metabolic process		Disease related genes; Predicted intracellular proteins; ENZYME proteins:Oxidoreductases; Potential drug targets; Enzymes		Vitamin A		(M5949)HALLMARK PEROXISOME; (M5935)HALLMARK FATTY ACID METABOLISM; (M5924)HALLMARK MTORC1 SIGNALING	0	0	0	0	1	0	0	0	0	0	0	0	0	0	0	0	0	0	0	0	0
27332	ZNF638	0	0	1	27332	Gene_ID	H. sapiens	27332	H. sapiens	ZNF638	zinc finger protein 638	GO:0008380 RNA splicing;GO:0006396 RNA processing;GO:0016070 RNA metabolic process		Predicted intracellular proteins	Nucleoplasm (Enhanced); Additional: Vesicles				0	0	0	0	0	0	0	0	0	0	0	0	0	0	0	0	0	0	0	0	0
79726	WDR59	0	0	1	79726	Gene_ID	H. sapiens	79726	H. sapiens	WDR59	WD repeat domain 59	GO:0034198 cellular response to amino acid starvation;GO:0032008 positive regulation of TOR signaling;GO:1990928 response to amino acid starvation		Predicted intracellular proteins	Cytosol (Approved)				1	0	0	0	0	0	0	0	0	0	0	0	0	0	0	0	0	0	0	1	0
196074	METTL15	0	0	1	196074	Gene_ID	H. sapiens	196074	H. sapiens	METTL15	methyltransferase like 15	GO:0070475 rRNA base methylation;GO:0031167 rRNA methylation;GO:0000154 rRNA modification		Predicted intracellular proteins	Golgi apparatus;Plasma membrane (Approved); Additional: Actin filaments				0	0	0	0	0	0	0	1	0	0	0	0	0	0	0	0	0	0	1	0	0
85363	TRIM5	1	0	0	85363	Gene_ID	H. sapiens	85363	H. sapiens	TRIM5	tripartite motif containing 5	GO:1902187 negative regulation of viral release from host cell;GO:0046597 negative regulation of viral entry into host cell;GO:1903901 negative regulation of viral life cycle		Predicted intracellular proteins; Enzymes; ENZYME proteins:Transferases	Cytosol (Supported)			(M5911)HALLMARK INTERFERON ALPHA RESPONSE	0	0	0	0	0	0	0	0	1	0	0	0	0	0	0	0	0	0	0	0	1
25842	ASF1A	0	0	1	25842	Gene_ID	H. sapiens	25842	H. sapiens	ASF1A	anti-silencing function 1A histone chaperone	GO:0006335 DNA replication-dependent nucleosome assembly;GO:0034723 DNA replication-dependent nucleosome organization;GO:0006336 DNA replication-independent nucleosome assembly		Predicted intracellular proteins	Nucleoplasm (Enhanced)			(M5925)HALLMARK E2F TARGETS	1	1	0	0	1	0	0	0	0	0	0	0	0	0	0	0	0	0	0	0	0
494514	TYMSOS	1	0	0	494514	Gene_ID	H. sapiens	494514	H. sapiens	TYMSOS	TYMS opposite strand RNA								0	0	0	0	0	0	0	0	0	0	0	0	0	0	0	0	0	0	0	0	1
1759	DNM1	0	0	1	1759	Gene_ID	H. sapiens	1759	H. sapiens	DNM1	dynamin 1	GO:0016185 synaptic vesicle budding from presynaptic endocytic zone membrane;GO:0070142 synaptic vesicle budding;GO:1900244 positive regulation of synaptic vesicle endocytosis		Disease related genes; Predicted intracellular proteins; Potential drug targets; ENZYME proteins:Hydrolases; Enzymes	Nucleoplasm (Supported)		(M252)PID IL8 CXCR1 PATHWAY; (M257)PID EPHRINB REV PATHWAY; (M210)PID IL8 CXCR2 PATHWAY		0	0	0	0	0	0	0	0	0	1	0	0	0	1	0	0	0	0	0	0	0
25843	MOB4	0	0	1	25843	Gene_ID	H. sapiens	25843	H. sapiens	MOB4	MOB family member 4, phocein			Predicted intracellular proteins					0	0	0	0	0	0	0	0	0	0	0	0	0	0	0	0	0	0	0	0	0
201965	RWDD4	0	0	1	201965	Gene_ID	H. sapiens	201965	H. sapiens	RWDD4	RWD domain containing 4			Predicted intracellular proteins	Intermediate filaments (Approved)				0	0	0	0	0	0	0	0	0	0	0	0	0	0	0	0	0	0	0	0	0
55759	WDR12	0	0	1	55759	Gene_ID	H. sapiens	55759	H. sapiens	WDR12	WD repeat domain 12	GO:0000463 maturation of LSU-rRNA from tricistronic rRNA transcript (SSU-rRNA, 5.8S rRNA, LSU-rRNA);GO:0000466 maturation of 5.8S rRNA from tricistronic rRNA transcript (SSU-rRNA, 5.8S rRNA, LSU-rRNA);GO:0000470 maturation of LSU-rRNA		Predicted intracellular proteins	Cytosol;Plasma membrane (Approved); Additional: Nucleoli				0	0	0	0	0	0	0	1	0	0	0	1	0	0	0	0	0	0	0	0	0
10174	SORBS3	0	0	1	10174	Gene_ID	H. sapiens	10174	H. sapiens	SORBS3	sorbin and SH3 domain containing 3	GO:0051496 positive regulation of stress fiber assembly;GO:0032233 positive regulation of actin filament bundle assembly;GO:0051492 regulation of stress fiber assembly		Predicted intracellular proteins	Cytosol (Approved); Additional: Focal adhesion sites			(M5909)HALLMARK MYOGENESIS; (M5915)HALLMARK APICAL JUNCTION	0	0	0	0	0	0	0	0	0	0	0	0	0	0	0	0	0	0	0	0	0
85313	PPIL4	0	0	1	85313	Gene_ID	H. sapiens	85313	H. sapiens	PPIL4	peptidylprolyl isomerase like 4	GO:1901407 regulation of phosphorylation of RNA polymerase II C-terminal domain;GO:0070816 phosphorylation of RNA polymerase II C-terminal domain;GO:0000413 protein peptidyl-prolyl isomerization		Predicted intracellular proteins; ENZYME proteins:Isomerase; Enzymes	Nucleoplasm (Enhanced); Additional: Cytosol				0	0	0	0	0	0	0	0	0	0	0	1	0	0	0	0	0	0	0	0	0
9493	KIF23	1	0	0	9493	Gene_ID	H. sapiens	9493	H. sapiens	KIF23	kinesin family member 23	GO:0051256 mitotic spindle midzone assembly;GO:0000022 mitotic spindle elongation;GO:0051231 spindle elongation		Predicted intracellular proteins	Nucleoplasm (Enhanced); Additional: Midbody ring;Mitotic spindle		(M14)PID AURORA B PATHWAY	(M5893)HALLMARK MITOTIC SPINDLE; (M5901)HALLMARK G2M CHECKPOINT	0	0	0	0	0	1	0	0	0	0	0	0	0	0	0	0	0	0	0	0	1
100129075	KTN1-AS1	0	0	1	100129075	Gene_ID	H. sapiens	100129075	H. sapiens	KTN1-AS1	KTN1 antisense RNA 1								0	0	0	0	0	0	0	0	0	0	0	0	0	0	0	0	0	0	0	0	0
28985	MCTS1	0	0	1	28985	Gene_ID	H. sapiens	28985	H. sapiens	MCTS1	MCTS1 re-initiation and release factor	GO:0002188 translation reinitiation;GO:0032790 ribosome disassembly;GO:0001731 formation of translation preinitiation complex		Predicted intracellular proteins	Cytosol (Supported); Additional: Plasma membrane				0	1	0	1	0	0	0	1	0	0	0	0	0	0	0	0	0	0	0	0	0
26580	BSCL2	1	0	0	26580	Gene_ID	H. sapiens	26580	H. sapiens	BSCL2	BSCL2 lipid droplet biogenesis associated, seipin	GO:0140042 lipid droplet formation;GO:0050995 negative regulation of lipid catabolic process;GO:0034389 lipid droplet organization		Predicted intracellular proteins; Disease related genes					0	0	0	0	0	0	0	0	0	0	0	0	0	0	0	0	0	0	0	0	1
55300	PI4K2B	0	0	1	55300	Gene_ID	H. sapiens	55300	H. sapiens	PI4K2B	phosphatidylinositol 4-kinase type 2 beta	GO:0046854 phosphatidylinositol phosphate biosynthetic process;GO:0007032 endosome organization;GO:0006661 phosphatidylinositol biosynthetic process		Predicted intracellular proteins; Enzymes; ENZYME proteins:Transferases	Cytosol (Supported)	Resveratrol			0	0	0	0	0	0	0	0	0	0	0	0	0	0	0	0	0	0	0	0	0
26227	PHGDH	1	0	0	26227	Gene_ID	H. sapiens	26227	H. sapiens	PHGDH	phosphoglycerate dehydrogenase	GO:0009448 gamma-aminobutyric acid metabolic process;GO:0006566 threonine metabolic process;GO:0019530 taurine metabolic process		Disease related genes; Predicted intracellular proteins; ENZYME proteins:Oxidoreductases; Potential drug targets; Enzymes	Cytosol;Plasma membrane (Enhanced); Additional: Nucleoplasm	NADH		(M5924)HALLMARK MTORC1 SIGNALING	0	0	0	0	0	0	0	0	0	0	0	0	0	0	0	0	0	0	0	0	1
55017	C14orf119	1	0	0	55017	Gene_ID	H. sapiens	55017	H. sapiens	C14orf119	chromosome 14 open reading frame 119			Predicted intracellular proteins	Mitochondria (Supported); Additional: Cytosol				0	0	0	0	0	0	0	0	0	0	0	0	0	0	0	0	0	0	0	0	1
90624	LYRM7	0	0	1	90624	Gene_ID	H. sapiens	90624	H. sapiens	LYRM7	LYR motif containing 7	GO:0017062 respiratory chain complex III assembly;GO:0034551 mitochondrial respiratory chain complex III assembly;GO:0017004 cytochrome complex assembly		Predicted intracellular proteins; Disease related genes					0	0	0	0	0	0	0	0	0	0	0	0	0	0	0	0	0	0	0	0	0
4331	MNAT1	0	0	1	4331	Gene_ID	H. sapiens	4331	H. sapiens	MNAT1	MNAT1 component of CDK activating kinase	GO:1905775 negative regulation of DNA helicase activity;GO:1905463 negative regulation of DNA duplex unwinding;GO:1905774 regulation of DNA helicase activity		Predicted intracellular proteins	Nucleoplasm (Enhanced)		(M207)PID RETINOIC ACID PATHWAY	(M5901)HALLMARK G2M CHECKPOINT	0	1	0	0	1	1	0	0	0	0	0	1	0	0	0	0	1	0	0	0	0
2966	GTF2H2	0	0	1	2966	Gene_ID	H. sapiens	2966	H. sapiens	GTF2H2	general transcription factor IIH subunit 2	GO:1905464 positive regulation of DNA duplex unwinding;GO:1905776 positive regulation of DNA helicase activity;GO:1905774 regulation of DNA helicase activity		Predicted intracellular proteins	Nuclear speckles (Supported)		(M254)PID MYC REPRESS PATHWAY		0	1	0	0	1	0	0	0	1	1	0	1	0	0	0	0	1	0	0	0	0
81542	TMX1	0	0	1	81542	Gene_ID	H. sapiens	81542	H. sapiens	TMX1	thioredoxin related transmembrane protein 1	GO:0034976 response to endoplasmic reticulum stress;GO:0033554 cellular response to stress;GO:0006950 response to stress			Endoplasmic reticulum (Supported); Additional: Nucleoli			(M5910)HALLMARK PROTEIN SECRETION	0	0	0	0	0	0	0	0	0	0	0	0	1	0	0	0	0	0	0	0	0
301	ANXA1	1	0	0	301	Gene_ID	H. sapiens	301	H. sapiens	ANXA1	annexin A1	GO:0014839 myoblast migration involved in skeletal muscle regeneration;GO:0033031 positive regulation of neutrophil apoptotic process;GO:0045629 negative regulation of T-helper 2 cell differentiation		Predicted intracellular proteins; Transporters:Transporter channels and pores; Cancer-related genes:Candidate cancer biomarkers; FDA approved drug targets:Small molecule drugs; Predicted secreted proteins	Cytosol;Plasma membrane (Enhanced); Additional: Nucleoplasm	Amcinonide; Fluocinolone acetonide; Hydrocortisone; Methylprednisolone; Clobetasol propionate; Budesonide; Dexamethasone; Hydrocortisone aceponate; Hydrocortisone acetate; Hydrocortisone butyrate; Hydrocortisone cypionate; Hydrocortisone phosphate; Hydrocortisone probutate; Hydrocortisone valerate; Prednisolone phosphate; Dexamethasone acetate; Betamethasone phosphate	(M5880)NABA ECM AFFILIATED; (M5885)NABA MATRISOME ASSOCIATED; (M5889)NABA MATRISOME	(M5946)HALLMARK COAGULATION; (M5902)HALLMARK APOPTOSIS	0	0	0	0	1	0	0	0	0	0	0	0	0	0	1	0	1	0	0	0	1
9997	SCO2	1	0	0	9997	Gene_ID	H. sapiens	9997	H. sapiens	SCO2	synthesis of cytochrome C oxidase 2	GO:0006878 cellular copper ion homeostasis;GO:0055070 copper ion homeostasis;GO:0033617 mitochondrial cytochrome c oxidase assembly		Predicted intracellular proteins	Mitochondria (Approved)				1	0	0	0	0	0	0	0	0	0	0	0	0	0	0	0	0	0	0	0	1
8813	DPM1	0	0	1	8813	Gene_ID	H. sapiens	8813	H. sapiens	DPM1	dolichyl-phosphate mannosyltransferase subunit 1, catalytic	GO:0019348 dolichol metabolic process;GO:0016093 polyprenol metabolic process;GO:0019673 GDP-mannose metabolic process		Disease related genes; ENZYME proteins:Transferases; Predicted intracellular proteins; Potential drug targets; Enzymes					0	0	0	0	0	0	0	0	0	0	0	0	0	0	0	0	0	0	0	0	0
144577	C12orf66	0	0	1	144577	Gene_ID	H. sapiens	144577	H. sapiens	KICS2	KICSTOR subunit 2	GO:1904262 negative regulation of TORC1 signaling;GO:1903432 regulation of TORC1 signaling;GO:0032007 negative regulation of TOR signaling		Predicted intracellular proteins	Lysosomes (Supported); Additional: Cytokinetic bridge				1	0	0	0	0	0	0	0	0	0	0	0	0	0	0	0	0	0	0	1	0
9126	SMC3	0	0	1	9126	Gene_ID	H. sapiens	9126	H. sapiens	SMC3	structural maintenance of chromosomes 3	GO:0007064 mitotic sister chromatid cohesion;GO:0007062 sister chromatid cohesion;GO:0090307 mitotic spindle assembly		Cancer-related genes:Mutated cancer genes; Cancer-related genes:Mutational cancer driver genes; Predicted intracellular proteins; Disease related genes	Nucleoplasm (Supported)		(M84)PID ATM PATHWAY	(M5893)HALLMARK MITOTIC SPINDLE; (M5925)HALLMARK E2F TARGETS	0	1	0	0	1	1	0	0	0	0	0	0	0	0	0	0	0	0	0	0	0
375444	C5orf34	0	0	1	375444	Gene_ID	H. sapiens	375444	H. sapiens	C5orf34	chromosome 5 open reading frame 34			Predicted intracellular proteins					0	0	0	0	0	0	0	0	0	0	0	0	0	0	0	0	0	0	0	0	0
3925	STMN1	1	0	0	3925	Gene_ID	H. sapiens	3925	H. sapiens	STMN1	stathmin 1	GO:0070494 regulation of thrombin-activated receptor signaling pathway;GO:0070495 negative regulation of thrombin-activated receptor signaling pathway;GO:1905098 negative regulation of guanyl-nucleotide exchange factor activity		Predicted intracellular proteins; Cancer-related genes:Candidate cancer biomarkers	Cytosol (Approved)		(M209)PID P38 GAMMA DELTA PATHWAY; (M14)PID AURORA B PATHWAY	(M5901)HALLMARK G2M CHECKPOINT; (M5925)HALLMARK E2F TARGETS; (M5937)HALLMARK GLYCOLYSIS	0	0	0	0	0	0	0	0	0	1	0	0	0	1	0	0	0	0	0	0	1
64359	NXN	0	0	1	64359	Gene_ID	H. sapiens	64359	H. sapiens	NXN	nucleoredoxin	GO:0031397 negative regulation of protein ubiquitination;GO:1903321 negative regulation of protein modification by small protein conjugation or removal;GO:0098869 cellular oxidant detoxification		ENZYME proteins:Oxidoreductases; Predicted intracellular proteins; Enzymes	Cytosol (Approved)				0	0	0	0	0	0	0	0	0	0	0	0	0	0	0	0	0	0	0	0	0
9646	CTR9	1	0	0	9646	Gene_ID	H. sapiens	9646	H. sapiens	CTR9	CTR9 homolog, Paf1/RNA polymerase II complex component	GO:2001162 positive regulation of histone H3-K79 methylation;GO:2001160 regulation of histone H3-K79 methylation;GO:2001168 positive regulation of histone H2B ubiquitination		Predicted intracellular proteins	Nucleoplasm (Enhanced)				0	0	0	0	1	0	0	0	1	0	0	0	0	0	0	0	0	0	1	0	1
51170	HSD17B11	0	0	1	51170	Gene_ID	H. sapiens	51170	H. sapiens	HSD17B11	hydroxysteroid 17-beta dehydrogenase 11	GO:0006710 androgen catabolic process;GO:0042447 hormone catabolic process;GO:0006703 estrogen biosynthetic process		ENZYME proteins:Oxidoreductases; Predicted intracellular proteins; Enzymes	Lipid droplets (Supported)	Aetiocholanolone		(M5949)HALLMARK PEROXISOME; (M5948)HALLMARK BILE ACID METABOLISM; (M5935)HALLMARK FATTY ACID METABOLISM	0	0	0	0	0	0	0	0	0	0	0	0	0	0	0	0	0	0	0	0	0
55345	ZGRF1	1	0	0	55345	Gene_ID	H. sapiens	55345	H. sapiens	ZGRF1	zinc finger GRF-type containing 1	GO:0071932 replication fork reversal;GO:0031297 replication fork processing;GO:0045005 DNA-dependent DNA replication maintenance of fidelity		Predicted intracellular proteins	Cytosol (Approved)				0	0	0	0	0	0	0	0	0	0	0	0	0	0	0	0	0	0	0	0	1
55319	TMA16	0	0	1	55319	Gene_ID	H. sapiens	55319	H. sapiens	TMA16	translation machinery associated 16 homolog			Predicted intracellular proteins	Nucleoli (Enhanced); Additional: Nucleoplasm				0	0	0	0	0	0	0	0	0	0	0	0	0	0	0	0	0	0	0	0	0
84335	AKT1S1	0	0	1	84335	Gene_ID	H. sapiens	84335	H. sapiens	AKT1S1	AKT1 substrate 1	GO:0045792 negative regulation of cell size;GO:0048011 neurotrophin TRK receptor signaling pathway;GO:0038179 neurotrophin signaling pathway		Predicted intracellular proteins	Cytosol (Supported)		(M87)PID LKB1 PATHWAY; (M121)PID MTOR 4PATHWAY; (M48)PID MET PATHWAY	(M5923)HALLMARK PI3K AKT MTOR SIGNALING	1	0	0	0	0	0	0	0	0	0	0	0	0	1	0	0	0	0	0	1	0
10438	C1D	0	0	1	10438	Gene_ID	H. sapiens	10438	H. sapiens	C1D	C1D nuclear receptor corepressor	GO:0000460 maturation of 5.8S rRNA;GO:0006364 rRNA processing;GO:0016072 rRNA metabolic process		Predicted intracellular proteins	Nucleoli;Nucleoplasm (Supported)				0	0	0	0	0	0	0	1	0	0	0	1	0	0	0	0	0	0	0	0	0
51699	VPS29	0	0	1	51699	Gene_ID	H. sapiens	51699	H. sapiens	VPS29	VPS29 retromer complex component	GO:0032456 endocytic recycling;GO:0042147 retrograde transport, endosome to Golgi;GO:0098876 vesicle-mediated transport to the plasma membrane		Predicted intracellular proteins	Cytosol;Vesicles (Supported)				0	0	0	0	0	0	0	0	0	0	0	0	0	0	0	0	0	0	0	0	0
1291	COL6A1	0	0	1	1291	Gene_ID	H. sapiens	1291	H. sapiens	COL6A1	collagen type VI alpha 1 chain	GO:0035987 endodermal cell differentiation;GO:0001706 endoderm formation;GO:0071230 cellular response to amino acid stimulus		Disease related genes; Predicted secreted proteins; Cancer-related genes:Candidate cancer biomarkers	Cytosol (Approved)		(M5887)NABA BASEMENT MEMBRANES; (M3005)NABA COLLAGENS; (M198)PID SYNDECAN 1 PATHWAY	(M5947)HALLMARK IL2 STAT5 SIGNALING	0	0	0	0	0	0	0	0	0	0	0	0	0	1	0	0	0	0	0	0	0
84945	ABHD13	0	0	1	84945	Gene_ID	H. sapiens	84945	H. sapiens	ABHD13	abhydrolase domain containing 13	GO:0002084 protein depalmitoylation;GO:0098734 macromolecule depalmitoylation;GO:0042159 lipoprotein catabolic process			Cytosol (Approved)				0	0	0	0	0	0	0	0	0	0	0	0	0	0	0	0	0	0	0	0	0
55332	DRAM1	0	0	1	55332	Gene_ID	H. sapiens	55332	H. sapiens	DRAM1	DNA damage regulated autophagy modulator 1	GO:0010506 regulation of autophagy;GO:0006914 autophagy;GO:0061919 process utilizing autophagic mechanism		Predicted intracellular proteins				(M5890)HALLMARK TNFA SIGNALING VIA NFKB; (M5939)HALLMARK P53 PATHWAY	0	0	0	0	0	0	0	0	0	0	0	0	0	0	0	0	0	0	0	0	0
253832	ZDHHC20	0	0	1	253832	Gene_ID	H. sapiens	253832	H. sapiens	ZDHHC20	zinc finger DHHC-type palmitoyltransferase 20	GO:0018230 peptidyl-L-cysteine S-palmitoylation;GO:0018231 peptidyl-S-diacylglycerol-L-cysteine biosynthetic process from peptidyl-cysteine;GO:0018345 protein palmitoylation		Enzymes; ENZYME proteins:Transferases	Plasma membrane;Vesicles (Supported)				0	0	0	0	0	0	0	0	0	0	0	0	0	0	0	0	0	0	0	0	0
100505687	LINC00888	0	0	1	100505687	Gene_ID	H. sapiens	100505687	H. sapiens	LINC00888	long intergenic non-protein coding RNA 888								0	0	0	0	0	0	0	0	0	0	0	0	0	0	0	0	0	0	0	0	0
50861	STMN3	0	0	1	50861	Gene_ID	H. sapiens	50861	H. sapiens	STMN3	stathmin 3	GO:0035021 negative regulation of Rac protein signal transduction;GO:0035020 regulation of Rac protein signal transduction;GO:0001835 blastocyst hatching		Predicted intracellular proteins	Golgi apparatus (Supported); Additional: Cytosol				0	0	0	0	0	0	0	0	0	0	0	0	0	0	0	1	0	0	0	0	0
84996	URB1-AS1	1	0	0	84996	Gene_ID	H. sapiens	84996	H. sapiens	URB1-AS1	URB1 antisense RNA 1 (head to head)								0	0	0	0	0	0	0	0	0	0	0	0	0	0	0	0	0	0	0	0	1
3140	MR1	1	0	0	3140	Gene_ID	H. sapiens	3140	H. sapiens	MR1	major histocompatibility complex, class I-related	GO:0002852 regulation of T cell mediated cytotoxicity directed against tumor cell target;GO:0002854 positive regulation of T cell mediated cytotoxicity directed against tumor cell target;GO:0002419 T cell mediated cytotoxicity directed against tumor cell target		Predicted intracellular proteins; FDA approved drug targets:Biotech drugs	Plasma membrane (Supported)	Antithymocyte immunoglobulin (rabbit)			0	0	0	0	1	0	0	0	0	0	0	0	0	0	0	0	0	0	0	0	1
63915	BLOC1S5	0	0	1	63915	Gene_ID	H. sapiens	63915	H. sapiens	BLOC1S5	biogenesis of lysosomal organelles complex 1 subunit 5	GO:0050942 positive regulation of pigment cell differentiation;GO:0050932 regulation of pigment cell differentiation;GO:0048087 positive regulation of developmental pigmentation		Predicted intracellular proteins	Vesicles (Supported)				0	0	0	0	0	0	0	0	0	0	0	0	0	0	0	0	0	0	0	0	0
11285	B4GALT7	1	0	0	11285	Gene_ID	H. sapiens	11285	H. sapiens	B4GALT7	beta-1,4-galactosyltransferase 7	GO:0048147 negative regulation of fibroblast proliferation;GO:0030166 proteoglycan biosynthetic process;GO:0006487 protein N-linked glycosylation		Disease related genes; ENZYME proteins:Transferases; Predicted intracellular proteins; Potential drug targets; Enzymes				(M5937)HALLMARK GLYCOLYSIS	0	0	0	0	0	0	0	0	0	0	0	0	0	0	0	0	0	0	0	0	1
10383	TUBB4B	0	0	1	10383	Gene_ID	H. sapiens	10383	H. sapiens	TUBB4B	tubulin beta 4B class IVb	GO:0042267 natural killer cell mediated cytotoxicity;GO:0002228 natural killer cell mediated immunity;GO:0001909 leukocyte mediated cytotoxicity		FDA approved drug targets:Small molecule drugs; Predicted intracellular proteins	Microtubules (Supported); Additional: Cytokinetic bridge;Mitotic spindle	Albendazole; Mebendazole; Epothilone D; Patupilone; Oxibendazole; CYT997; Phenethyl Isothiocyanate			1	0	0	0	1	1	0	0	0	0	0	0	0	0	0	0	0	0	0	0	0
23030	KDM4B	1	0	0	23030	Gene_ID	H. sapiens	23030	H. sapiens	KDM4B	lysine demethylase 4B	GO:0070544 histone H3-K36 demethylation;GO:0033169 histone H3-K9 demethylation;GO:0070076 histone lysine demethylation		Predicted intracellular proteins	Nucleoplasm (Supported); Additional: Cytosol			(M5906)HALLMARK ESTROGEN RESPONSE EARLY	0	0	0	0	1	0	0	0	0	0	0	0	0	0	0	0	0	0	0	0	1
11068	CYB561D2	1	0	0	11068	Gene_ID	H. sapiens	11068	H. sapiens	CYB561D2	cytochrome b561 family member D2	GO:0140576 ascorbate homeostasis;GO:0055081 anion homeostasis;GO:0050801 ion homeostasis							0	0	0	0	0	0	0	0	0	0	0	0	0	0	0	0	0	0	0	0	1
55681	SCYL2	0	0	1	55681	Gene_ID	H. sapiens	55681	H. sapiens	SCYL2	SCY1 like pseudokinase 2	GO:2000286 receptor internalization involved in canonical Wnt signaling pathway;GO:2000370 positive regulation of clathrin-dependent endocytosis;GO:0021860 pyramidal neuron development	Other	Predicted intracellular proteins; Enzymes; Kinases					0	0	0	0	0	0	0	0	0	1	0	0	0	0	0	0	0	0	0	0	0
84524	ZC3H8	0	0	1	84524	Gene_ID	H. sapiens	84524	H. sapiens	ZC3H8	zinc finger CCCH-type containing 8	GO:0070245 positive regulation of thymocyte apoptotic process;GO:0033085 negative regulation of T cell differentiation in thymus;GO:0042796 snRNA transcription by RNA polymerase III		Transcription factors:Zinc-coordinating DNA-binding domains; Predicted intracellular proteins	Nucleoplasm (Supported); Additional: Nuclear bodies				0	0	0	0	0	0	0	0	0	0	0	0	0	0	0	0	0	0	0	0	0
79871	RPAP2	0	0	1	79871	Gene_ID	H. sapiens	79871	H. sapiens	RPAP2	RNA polymerase II associated protein 2	GO:0070940 dephosphorylation of RNA polymerase II C-terminal domain;GO:0009301 snRNA transcription;GO:0098781 ncRNA transcription		Enzymes; ENZYME proteins:Hydrolases	Cytosol;Nucleoli (Supported)				0	0	0	0	0	0	0	0	0	0	0	0	0	0	0	0	0	0	0	0	0
23376	UFL1	0	0	1	23376	Gene_ID	H. sapiens	23376	H. sapiens	UFL1	UFM1 specific ligase 1	GO:1903895 negative regulation of IRE1-mediated unfolded protein response;GO:1990564 protein polyufmylation;GO:1990592 protein K69-linked ufmylation		Predicted intracellular proteins	Endoplasmic reticulum (Supported)				0	1	0	0	0	0	0	0	0	0	0	0	1	0	0	0	0	0	0	0	0
11340	EXOSC8	0	0	1	11340	Gene_ID	H. sapiens	11340	H. sapiens	EXOSC8	exosome component 8	GO:0034473 U1 snRNA 3'-end processing;GO:0034476 U5 snRNA 3'-end processing;GO:0071042 nuclear polyadenylation-dependent mRNA catabolic process		Predicted intracellular proteins; Disease related genes	Mitotic chromosome;Nucleoli fibrillar center;Vesicles (Supported)			(M5925)HALLMARK E2F TARGETS	1	0	0	1	0	0	1	1	0	0	0	1	1	0	0	0	0	0	0	0	0
3265	HRAS	0	0	1	3265	Gene_ID	H. sapiens	3265	H. sapiens	HRAS	HRas proto-oncogene, GTPase	GO:0035900 response to isolation stress;GO:2000630 positive regulation of miRNA metabolic process;GO:0098696 regulation of neurotransmitter receptor localization to postsynaptic specialization membrane		Disease related genes; Predicted intracellular proteins; RAS pathway related proteins; Cancer-related genes:Mutational cancer driver genes; Cancer-related genes:Candidate cancer biomarkers; Cancer-related genes:Mutated cancer genes	Cytosol;Nucleoplasm (Approved)	Hexane-1,6-Diol; Trifluoroethanol; Guanosine-5'-Triphosphate; Guanosine-5'-Diphosphate; N,N'-DIMETHYL-N-(ACETYL)-N'-(7-NITROBENZ-2-OXA-1,3-DIAZOL-4-YL)ETHYLENEDIAMINE	(M134)PID TCR RAS PATHWAY; (M18895)SA TRKA RECEPTOR; (M17200)SA B CELL RECEPTOR COMPLEXES	(M5949)HALLMARK PEROXISOME; (M5923)HALLMARK PI3K AKT MTOR SIGNALING; (M5915)HALLMARK APICAL JUNCTION	0	1	0	0	1	0	0	1	1	0	0	0	0	1	1	1	0	1	0	0	0
51374	ATRAID	0	0	1	51374	Gene_ID	H. sapiens	51374	H. sapiens	ATRAID	all-trans retinoic acid induced differentiation factor	GO:0033689 negative regulation of osteoblast proliferation;GO:0033688 regulation of osteoblast proliferation;GO:0033687 osteoblast proliferation		Predicted intracellular proteins					0	0	0	0	0	0	0	0	0	0	0	0	0	0	0	0	0	0	0	0	0
79968	WDR76	1	0	0	79968	Gene_ID	H. sapiens	79968	H. sapiens	WDR76	WD repeat domain 76	GO:2000001 regulation of DNA damage checkpoint;GO:1901976 regulation of cell cycle checkpoint;GO:0000077 DNA damage checkpoint signaling		Predicted intracellular proteins	Nuclear bodies (Approved); Additional: Nucleoli fibrillar center				0	1	0	0	0	0	0	0	0	0	0	0	0	0	0	0	0	0	0	0	1
8970	H2BC11	1	0	0	8970	Gene_ID	H. sapiens	8970	H. sapiens	H2BC11	H2B clustered histone 11	GO:0010804 negative regulation of tumor necrosis factor-mediated signaling pathway;GO:0002227 innate immune response in mucosa;GO:0002385 mucosal immune response		Predicted intracellular proteins	Nucleoplasm (Approved); Additional: Cytosol				1	0	0	0	1	1	0	0	0	0	0	0	0	0	0	0	0	0	0	0	1
307	ANXA4	0	0	1	307	Gene_ID	H. sapiens	307	H. sapiens	ANXA4	annexin A4	GO:0032717 negative regulation of interleukin-8 production;GO:0032088 negative regulation of NF-kappaB transcription factor activity;GO:0032677 regulation of interleukin-8 production		Predicted intracellular proteins; Cancer-related genes:Candidate cancer biomarkers	Cytosol (Approved)	Fluocinolone acetonide; Copper	(M5880)NABA ECM AFFILIATED; (M5885)NABA MATRISOME ASSOCIATED; (M5889)NABA MATRISOME	(M5942)HALLMARK UV RESPONSE DN; (M5947)HALLMARK IL2 STAT5 SIGNALING	0	0	0	0	0	0	0	0	0	0	0	0	0	0	0	0	0	1	0	0	0
81034	SLC25A32	0	0	1	81034	Gene_ID	H. sapiens	81034	H. sapiens	SLC25A32	solute carrier family 25 member 32	GO:1904947 folate import into mitochondrion;GO:1990548 mitochondrial FAD transmembrane transport;GO:0015883 FAD transport		Potential drug targets; Disease related genes; Predicted intracellular proteins; Transporters:Electrochemical Potential-driven transporters	Mitochondria (Supported)				0	0	0	0	0	0	0	0	0	0	0	0	0	0	0	0	0	0	0	0	0
3895	KTN1	0	0	1	3895	Gene_ID	H. sapiens	3895	H. sapiens	KTN1	kinectin 1	GO:0007018 microtubule-based movement;GO:0007017 microtubule-based process;GO:0015031 protein transport		Predicted intracellular proteins; Cancer-related genes	Endoplasmic reticulum (Enhanced)				0	0	0	0	0	1	0	0	0	0	0	0	0	0	0	0	0	0	0	0	0
201973	PRIMPOL	0	0	1	201973	Gene_ID	H. sapiens	201973	H. sapiens	PRIMPOL	primase and DNA directed polymerase	GO:0062176 R-loop disassembly;GO:0043504 mitochondrial DNA repair;GO:0006269 DNA replication, synthesis of RNA primer		Predicted intracellular proteins; Disease related genes	Cytosol (Approved); Additional: Nucleoplasm				0	1	0	0	0	0	0	0	0	0	0	0	0	0	0	0	0	0	0	0	0
55425	GPALPP1	0	0	1	55425	Gene_ID	H. sapiens	55425	H. sapiens	GPALPP1	GPALPP motifs containing 1			Predicted intracellular proteins	Nucleoli rim (Approved); Additional: Nucleoplasm				0	0	0	0	0	0	0	0	0	0	0	0	0	0	0	0	0	0	0	0	0
55731	FAM222B	0	0	1	55731	Gene_ID	H. sapiens	55731	H. sapiens	FAM222B	family with sequence similarity 222 member B			Predicted intracellular proteins	Nucleoplasm (Enhanced)				0	0	0	0	0	0	0	0	0	0	0	0	0	0	0	0	0	0	0	0	0
81537	SGPP1	0	0	1	81537	Gene_ID	H. sapiens	81537	H. sapiens	SGPP1	sphingosine-1-phosphate phosphatase 1	GO:0006668 sphinganine-1-phosphate metabolic process;GO:0035621 ER to Golgi ceramide transport;GO:0035627 ceramide transport			Nucleoplasm (Supported)		(M155)PID S1P META PATHWAY		0	0	0	0	0	0	0	0	0	0	0	0	0	0	0	0	0	0	0	0	0
92140	MTDH	0	0	1	92140	Gene_ID	H. sapiens	92140	H. sapiens	MTDH	metadherin	GO:0031663 lipopolysaccharide-mediated signaling pathway;GO:0070830 bicellular tight junction assembly;GO:0120192 tight junction assembly		Predicted intracellular proteins	Endoplasmic reticulum (Enhanced)		(M66)PID MYC ACTIV PATHWAY		0	0	0	0	0	0	0	0	1	0	0	0	0	0	0	0	0	0	0	0	0
25963	TMEM87A	0	0	1	25963	Gene_ID	H. sapiens	25963	H. sapiens	TMEM87A	transmembrane protein 87A	GO:0042147 retrograde transport, endosome to Golgi;GO:0016482 cytosolic transport;GO:0016197 endosomal transport		Predicted intracellular proteins	Golgi apparatus (Supported)				0	0	0	0	0	1	0	0	0	0	0	0	0	0	0	0	0	0	0	0	0
56652	TWNK	1	0	0	56652	Gene_ID	H. sapiens	56652	H. sapiens	TWNK	twinkle mtDNA helicase	GO:0034214 protein hexamerization;GO:0006264 mitochondrial DNA replication;GO:0006268 DNA unwinding involved in DNA replication		Disease related genes; Predicted intracellular proteins; Potential drug targets; ENZYME proteins:Hydrolases; Enzymes					0	0	0	0	1	0	0	0	0	0	0	0	0	0	0	0	1	0	0	0	1
51074	APIP	0	0	1	51074	Gene_ID	H. sapiens	51074	H. sapiens	APIP	APAF1 interacting protein	GO:0019284 L-methionine salvage from S-adenosylmethionine;GO:0019509 L-methionine salvage from methylthioadenosine;GO:0033353 S-adenosylmethionine cycle		Predicted intracellular proteins; ENZYME proteins:Lyases; Enzymes	Nucleoplasm (Approved); Additional: Cytosol				0	0	0	0	0	0	1	0	0	0	0	0	0	0	0	0	0	0	0	0	0
83479	DDX59	0	0	1	83479	Gene_ID	H. sapiens	83479	H. sapiens	DDX59	DEAD-box helicase 59			Disease related genes; Predicted intracellular proteins; Potential drug targets; ENZYME proteins:Hydrolases; Enzymes	Actin filaments;Nucleoplasm (Approved)				0	0	0	0	0	0	0	0	0	0	0	0	0	0	0	0	0	0	0	0	0
151011	SEPTIN10	1	0	0	151011	Gene_ID	H. sapiens	151011	H. sapiens	SEPTIN10	septin 10	GO:0061640 cytoskeleton-dependent cytokinesis;GO:0000910 cytokinesis;GO:0051301 cell division		Predicted intracellular proteins	Actin filaments (Supported)				0	0	0	0	0	0	0	0	0	0	0	0	0	0	0	0	0	0	0	0	1
7832	BTG2	0	0	1	7832	Gene_ID	H. sapiens	7832	H. sapiens	BTG2	BTG anti-proliferation factor 2	GO:0060213 positive regulation of nuclear-transcribed mRNA poly(A) tail shortening;GO:0021542 dentate gyrus development;GO:0060211 regulation of nuclear-transcribed mRNA poly(A) tail shortening		Predicted intracellular proteins; Cancer-related genes:Candidate cancer biomarkers	Vesicles (Approved); Additional: Nucleoplasm		(M145)PID P53 DOWNSTREAM PATHWAY	(M5941)HALLMARK UV RESPONSE UP; (M5902)HALLMARK APOPTOSIS; (M5890)HALLMARK TNFA SIGNALING VIA NFKB	0	1	0	1	0	0	0	0	0	0	0	0	0	0	0	0	0	0	1	0	0
27069	GHITM	0	0	1	27069	Gene_ID	H. sapiens	27069	H. sapiens	GHITM	growth hormone inducible transmembrane protein	GO:1905448 positive regulation of mitochondrial ATP synthesis coupled electron transport;GO:1905446 regulation of mitochondrial ATP synthesis coupled electron transport;GO:0090201 negative regulation of release of cytochrome c from mitochondria			Mitochondria (Supported)			(M5905)HALLMARK ADIPOGENESIS	0	0	0	0	0	0	0	0	0	0	0	0	0	0	0	0	0	0	0	0	0
11188	NISCH	0	0	1	11188	Gene_ID	H. sapiens	11188	H. sapiens	NISCH	nischarin	GO:0048243 norepinephrine secretion;GO:0015874 norepinephrine transport;GO:0032228 regulation of synaptic transmission, GABAergic		FDA approved drug targets:Small molecule drugs; Predicted intracellular proteins	Cytosol;Nucleoplasm (Approved); Additional: Cytokinetic bridge;Microtubules;Vesicles	Tizanidine; Agmatine; Moxonidine			0	0	0	0	0	1	0	0	0	0	0	0	0	0	0	1	0	0	0	0	0
9603	NFE2L3	1	0	0	9603	Gene_ID	H. sapiens	9603	H. sapiens	NFE2L3	NFE2 like bZIP transcription factor 3	GO:0000122 negative regulation of transcription by RNA polymerase II;GO:0045892 negative regulation of transcription, DNA-templated;GO:1903507 negative regulation of nucleic acid-templated transcription		Transcription factors:Basic domains; Predicted intracellular proteins	Nucleoplasm;Vesicles (Approved)				0	0	0	0	0	0	0	0	0	0	0	0	0	0	0	0	0	0	0	0	1
199746	U2AF1L4	1	0	0	199746	Gene_ID	H. sapiens	199746	H. sapiens	U2AF1L4	U2 small nuclear RNA auxiliary factor 1 like 4	GO:0000377 RNA splicing, via transesterification reactions with bulged adenosine as nucleophile;GO:0000398 mRNA splicing, via spliceosome;GO:0000375 RNA splicing, via transesterification reactions		Predicted intracellular proteins	Nucleoplasm (Approved)				0	0	0	0	0	0	0	0	0	0	0	0	0	0	0	0	0	0	0	0	1
26520	TIMM9	0	0	1	26520	Gene_ID	H. sapiens	26520	H. sapiens	TIMM9	translocase of inner mitochondrial membrane 9	GO:0045039 protein insertion into mitochondrial inner membrane;GO:0051204 protein insertion into mitochondrial membrane;GO:0090151 establishment of protein localization to mitochondrial membrane		Predicted intracellular proteins	Mitochondria (Supported)			(M5936)HALLMARK OXIDATIVE PHOSPHORYLATION	0	0	0	0	0	0	0	0	0	0	0	0	0	0	0	0	0	0	0	0	0
8548	BLZF1	0	0	1	8548	Gene_ID	H. sapiens	8548	H. sapiens	BLZF1	basic leucine zipper nuclear factor 1	GO:0043001 Golgi to plasma membrane protein transport;GO:0006893 Golgi to plasma membrane transport;GO:0061951 establishment of protein localization to plasma membrane		Predicted intracellular proteins	Golgi apparatus (Supported); Additional: Nucleoplasm				0	0	0	0	0	1	0	0	0	0	0	0	0	0	1	0	0	0	0	0	0
27230	SERP1	0	0	1	27230	Gene_ID	H. sapiens	27230	H. sapiens	SERP1	stress associated endoplasmic reticulum protein 1	GO:0060124 positive regulation of growth hormone secretion;GO:0060123 regulation of growth hormone secretion;GO:0030252 growth hormone secretion		Predicted intracellular proteins	Endoplasmic reticulum (Approved)			(M5922)HALLMARK UNFOLDED PROTEIN RESPONSE; (M5924)HALLMARK MTORC1 SIGNALING	1	0	0	1	0	0	0	0	0	0	0	0	1	0	1	0	0	0	0	0	0
6464	SHC1	0	0	1	6464	Gene_ID	H. sapiens	6464	H. sapiens	SHC1	SHC adaptor protein 1	GO:0007176 regulation of epidermal growth factor-activated receptor activity;GO:0061097 regulation of protein tyrosine kinase activity;GO:0031532 actin cytoskeleton reorganization		Predicted intracellular proteins; RAS pathway related proteins	Cytosol (Enhanced)		(M12771)SA PTEN PATHWAY; (M18895)SA TRKA RECEPTOR; (M273)PID EPHA2 FWD PATHWAY	(M5922)HALLMARK UNFOLDED PROTEIN RESPONSE; (M5915)HALLMARK APICAL JUNCTION	1	0	0	0	1	0	0	0	1	0	0	0	1	1	0	0	0	0	0	0	0
83941	TM2D1	0	0	1	83941	Gene_ID	H. sapiens	83941	H. sapiens	TM2D1	TM2 domain containing 1	GO:0097190 apoptotic signaling pathway;GO:0007186 G protein-coupled receptor signaling pathway;GO:0006915 apoptotic process			Nucleoplasm (Approved); Additional: Vesicles				0	0	0	0	0	0	0	0	0	0	0	0	0	0	0	0	0	0	0	0	0
22926	ATF6	0	0	1	22926	Gene_ID	H. sapiens	22926	H. sapiens	ATF6	activating transcription factor 6	GO:1903893 positive regulation of ATF6-mediated unfolded protein response;GO:1903891 regulation of ATF6-mediated unfolded protein response;GO:0036500 ATF6-mediated unfolded protein response		Transcription factors:Basic domains; Disease related genes			(M229)PID P38 ALPHA BETA DOWNSTREAM PATHWAY	(M5922)HALLMARK UNFOLDED PROTEIN RESPONSE	1	1	0	0	0	0	0	0	0	0	0	0	1	0	0	0	0	0	0	0	0
54961	SSH3	0	0	1	54961	Gene_ID	H. sapiens	54961	H. sapiens	SSH3	slingshot protein phosphatase 3	GO:0030837 negative regulation of actin filament polymerization;GO:0032272 negative regulation of protein polymerization;GO:0035335 peptidyl-tyrosine dephosphorylation		Predicted intracellular proteins; Enzymes; ENZYME proteins:Hydrolases	Cytosol;Nuclear speckles (Approved); Additional: Actin filaments;Plasma membrane				0	0	0	0	0	0	0	0	0	0	0	0	0	0	0	0	0	0	0	0	0
4594	MMUT	0	0	1	4594	Gene_ID	H. sapiens	4594	H. sapiens	MMUT	methylmalonyl-CoA mutase	GO:0050667 homocysteine metabolic process;GO:0000096 sulfur amino acid metabolic process;GO:0009791 post-embryonic development		Disease related genes; Predicted intracellular proteins; FDA approved drug targets:Small molecule drugs; ENZYME proteins:Isomerase; Enzymes	Cytosol (Approved); Additional: Mitochondria	Cyanocobalamin; Hydroxocobalamin			0	0	0	0	0	0	1	0	0	0	0	0	0	0	0	0	0	0	0	0	0
653238	GTF2H2B	0	0	1	653238	Gene_ID	H. sapiens	653238	H. sapiens	GTF2H2B	general transcription factor IIH subunit 2B (pseudogene)								0	0	0	0	0	0	0	0	0	0	0	0	0	0	0	0	0	0	0	0	0
54893	MTMR10	0	1	0	54893	Gene_ID	H. sapiens	54893	H. sapiens	MTMR10	myotubularin related protein 10	GO:0046856 phosphatidylinositol dephosphorylation;GO:0046839 phospholipid dephosphorylation;GO:0046488 phosphatidylinositol metabolic process		Predicted intracellular proteins	Nuclear bodies;Nucleoplasm (Approved); Additional: Cytosol			(M5953)HALLMARK KRAS SIGNALING UP	0	0	0	0	0	0	0	0	0	0	1	0	0	0	0	0	0	0	0	0	0
1606	DGKA	1	0	0	1606	Gene_ID	H. sapiens	1606	H. sapiens	DGKA	diacylglycerol kinase alpha	GO:0046834 lipid phosphorylation;GO:0046339 diacylglycerol metabolic process;GO:0007205 protein kinase C-activating G protein-coupled receptor signaling pathway		Predicted intracellular proteins; Enzymes; ENZYME proteins:Transferases	Vesicles (Approved); Additional: Mitochondria;Nucleoplasm	Vitamin E; alpha-Tocopherol succinate	(M60)PID NFAT TFPATHWAY	(M5939)HALLMARK P53 PATHWAY	0	0	0	0	0	0	0	0	0	0	0	0	0	1	0	0	0	0	0	0	1
50854	SNHG32	0	0	1	50854	Gene_ID	H. sapiens	50854	H. sapiens	SNHG32	small nucleolar RNA host gene 32			Predicted intracellular proteins					0	0	0	0	0	0	0	0	0	0	0	0	0	0	0	0	0	0	0	0	0
10714	POLD3	1	0	0	10714	Gene_ID	H. sapiens	10714	H. sapiens	POLD3	DNA polymerase delta 3, accessory subunit	GO:1904161 DNA synthesis involved in UV-damage excision repair;GO:0006297 nucleotide-excision repair, DNA gap filling;GO:0070914 UV-damage excision repair		Predicted intracellular proteins	Nucleoplasm (Supported)			(M5898)HALLMARK DNA REPAIR; (M5925)HALLMARK E2F TARGETS	0	1	0	0	1	1	0	0	0	0	0	0	0	0	0	0	1	0	0	0	1
10605	PAIP1	0	0	1	10605	Gene_ID	H. sapiens	10605	H. sapiens	PAIP1	poly(A) binding protein interacting protein 1	GO:0048255 mRNA stabilization;GO:1902373 negative regulation of mRNA catabolic process;GO:0043489 RNA stabilization		Predicted intracellular proteins	Cytosol;Plasma membrane (Enhanced)			(M5922)HALLMARK UNFOLDED PROTEIN RESPONSE	0	0	0	1	0	0	0	0	0	0	0	1	0	0	0	0	0	0	0	0	0
11201	POLI	0	0	1	11201	Gene_ID	H. sapiens	11201	H. sapiens	POLI	DNA polymerase iota	GO:0042276 error-prone translesion synthesis;GO:0019985 translesion synthesis;GO:0006301 postreplication repair		Predicted intracellular proteins; Enzymes; ENZYME proteins:Transferases	Nuclear speckles (Supported); Additional: Cytoplasmic bodies				0	1	0	0	0	0	0	0	0	0	0	0	0	0	0	0	1	0	0	0	0
2617	GARS1	0	0	1	2617	Gene_ID	H. sapiens	2617	H. sapiens	GARS1	glycyl-tRNA synthetase 1	GO:0006426 glycyl-tRNA aminoacylation;GO:0070150 mitochondrial glycyl-tRNA aminoacylation;GO:0015960 diadenosine polyphosphate biosynthetic process		Disease related genes; ENZYME proteins:Ligase; Predicted intracellular proteins; Potential drug targets; ENZYME proteins:Hydrolases; Enzymes	Cytosol (Supported)	Glycine			0	0	0	1	0	0	1	1	0	0	0	0	0	1	0	0	0	0	0	0	0
25998	IBTK	0	0	1	25998	Gene_ID	H. sapiens	25998	H. sapiens	IBTK	inhibitor of Bruton tyrosine kinase	GO:0061099 negative regulation of protein tyrosine kinase activity;GO:0050732 negative regulation of peptidyl-tyrosine phosphorylation;GO:0061097 regulation of protein tyrosine kinase activity		Predicted intracellular proteins	Nucleoplasm (Supported)		(M10)PID BCR 5PATHWAY		0	0	0	0	0	0	0	0	0	0	0	0	0	1	0	0	0	0	0	0	0
3985	LIMK2	1	0	0	3985	Gene_ID	H. sapiens	3985	H. sapiens	LIMK2	LIM domain kinase 2	GO:0030953 astral microtubule organization;GO:0061303 cornea development in camera-type eye;GO:1902018 negative regulation of cilium assembly	TKL Ser/Thr protein kinase family	Predicted intracellular proteins; Kinases:TKL Ser/Thr protein kinases; Enzymes; ENZYME proteins:Transferases	Nucleoplasm (Supported); Additional: Cytosol	Fostamatinib	(M12)PID RHOA PATHWAY; (M81)PID CDC42 PATHWAY		0	0	0	0	0	1	0	0	1	0	0	0	0	1	1	0	0	0	0	0	1
283638	CEP170B	0	0	1	283638	Gene_ID	H. sapiens	283638	H. sapiens	CEP170B	centrosomal protein 170B			Predicted intracellular proteins	Cytosol (Approved); Additional: Centrosome;Microtubules				0	0	0	0	0	0	0	0	0	0	0	0	0	0	0	0	0	0	0	0	0
6158	RPL28	0	0	1	6158	Gene_ID	H. sapiens	6158	H. sapiens	RPL28	ribosomal protein L28	GO:0002181 cytoplasmic translation;GO:0006412 translation;GO:0043043 peptide biosynthetic process		Ribosomal proteins; Predicted intracellular proteins	Cytosol;Endoplasmic reticulum (Supported)				1	0	0	1	0	0	0	0	0	0	0	1	0	0	0	0	0	0	0	0	0
8493	PPM1D	1	0	0	8493	Gene_ID	H. sapiens	8493	H. sapiens	PPM1D	protein phosphatase, Mg2+/Mn2+ dependent 1D	GO:0035970 peptidyl-threonine dephosphorylation;GO:0060260 regulation of transcription initiation from RNA polymerase II promoter;GO:2000142 regulation of DNA-templated transcription, initiation		Disease related genes; Predicted intracellular proteins; Potential drug targets; ENZYME proteins:Hydrolases; Cancer-related genes:Candidate cancer biomarkers; Cancer-related genes:Mutated cancer genes; Enzymes	Nucleoplasm (Supported); Additional: Nucleoli		(M261)PID P53 REGULATION PATHWAY	(M5925)HALLMARK E2F TARGETS; (M5939)HALLMARK P53 PATHWAY	0	1	1	0	0	0	0	0	0	0	0	0	0	0	0	0	0	0	1	1	1
3646	EIF3E	0	0	1	3646	Gene_ID	H. sapiens	3646	H. sapiens	EIF3E	eukaryotic translation initiation factor 3 subunit E	GO:1902416 positive regulation of mRNA binding;GO:1905216 positive regulation of RNA binding;GO:1902415 regulation of mRNA binding		Predicted intracellular proteins; Cancer-related genes	Cytosol (Supported)		(M44)PID HIF2PATHWAY		0	0	0	1	0	0	0	1	0	0	0	0	0	0	0	0	0	0	0	0	0
94097	SFXN5	0	0	1	94097	Gene_ID	H. sapiens	94097	H. sapiens	SFXN5	sideroflexin 5	GO:0006842 tricarboxylic acid transport;GO:0015746 citrate transport;GO:1990542 mitochondrial transmembrane transport		Predicted intracellular proteins	Mitochondria;Nucleoplasm (Approved)				0	0	0	0	0	0	0	0	0	0	0	0	0	0	0	0	0	0	0	0	0
9739	SETD1A	0	0	1	9739	Gene_ID	H. sapiens	9739	H. sapiens	SETD1A	SET domain containing 1A, histone lysine methyltransferase	GO:0044648 histone H3-K4 dimethylation;GO:0097692 histone H3-K4 monomethylation;GO:1902036 regulation of hematopoietic stem cell differentiation		Predicted intracellular proteins; Enzymes; ENZYME proteins:Transferases	Nuclear speckles (Supported)				0	0	0	0	1	0	0	0	0	0	0	0	0	0	0	0	0	0	1	0	0
55959	SULF2	0	0	1	55959	Gene_ID	H. sapiens	55959	H. sapiens	SULF2	sulfatase 2	GO:0014846 esophagus smooth muscle contraction;GO:0035860 glial cell-derived neurotrophic factor receptor signaling pathway;GO:0032836 glomerular basement membrane development		Predicted intracellular proteins			(M3468)NABA ECM REGULATORS; (M5885)NABA MATRISOME ASSOCIATED; (M5889)NABA MATRISOME	(M5916)HALLMARK APICAL SURFACE	0	0	0	0	0	0	0	0	0	0	0	0	0	0	0	0	0	1	0	0	0
7705	ZNF146	0	0	1	7705	Gene_ID	H. sapiens	7705	H. sapiens	ZNF146	zinc finger protein 146	GO:0006357 regulation of transcription by RNA polymerase II;GO:0006366 transcription by RNA polymerase II;GO:0006355 regulation of transcription, DNA-templated		Transcription factors:Zinc-coordinating DNA-binding domains; Predicted intracellular proteins	Nucleoli (Supported)				0	0	0	0	0	0	0	0	0	0	0	0	0	0	0	0	0	0	0	0	0
63877	FAM204A	0	0	1	63877	Gene_ID	H. sapiens	63877	H. sapiens	FAM204A	family with sequence similarity 204 member A			Predicted intracellular proteins	Nucleoli;Nucleoplasm (Approved)				0	0	0	0	0	0	0	0	0	0	0	0	0	0	0	0	0	0	0	0	0
4253	MIA2	0	0	1	4253	Gene_ID	H. sapiens	4253	H. sapiens	MIA2	MIA SH3 domain ER export factor 2	GO:0035459 vesicle cargo loading;GO:0006888 endoplasmic reticulum to Golgi vesicle-mediated transport;GO:0048193 Golgi vesicle transport		Predicted intracellular proteins; Disease related genes	Endoplasmic reticulum (Supported)				0	0	0	0	0	0	0	0	0	0	0	0	0	0	0	0	0	0	0	0	0
9117	SEC22C	0	0	1	9117	Gene_ID	H. sapiens	9117	H. sapiens	SEC22C	SEC22 homolog C, vesicle trafficking protein	GO:0006888 endoplasmic reticulum to Golgi vesicle-mediated transport;GO:0048193 Golgi vesicle transport;GO:0046907 intracellular transport		Predicted intracellular proteins	Golgi apparatus (Approved); Additional: Nucleoplasm				0	0	0	0	0	0	0	0	0	0	0	0	0	0	0	0	0	0	0	0	0
10651	MTX2	0	0	1	10651	Gene_ID	H. sapiens	10651	H. sapiens	MTX2	metaxin 2	GO:0007007 inner mitochondrial membrane organization;GO:0007006 mitochondrial membrane organization;GO:0006839 mitochondrial transport		Predicted intracellular proteins	Mitochondria (Supported); Additional: Nucleoli			(M5936)HALLMARK OXIDATIVE PHOSPHORYLATION	0	0	0	0	0	0	0	0	0	0	0	0	0	0	0	0	0	0	0	0	0
3104	ZBTB48	1	0	0	3104	Gene_ID	H. sapiens	3104	H. sapiens	ZBTB48	zinc finger and BTB domain containing 48	GO:0010833 telomere maintenance via telomere lengthening;GO:0000723 telomere maintenance;GO:0032200 telomere organization		Transcription factors:Zinc-coordinating DNA-binding domains; Predicted intracellular proteins	Nucleoplasm (Supported); Additional: Cytosol				0	0	0	0	0	0	0	0	0	0	0	0	0	0	0	0	0	0	0	0	1
51501	HIKESHI	0	0	1	51501	Gene_ID	H. sapiens	51501	H. sapiens	HIKESHI	heat shock protein nuclear import factor hikeshi	GO:0034605 cellular response to heat;GO:0009408 response to heat;GO:0006606 protein import into nucleus		Predicted intracellular proteins; Disease related genes	Nuclear speckles (Approved); Additional: Nuclear bodies;Nucleoplasm				1	0	0	0	0	0	0	0	0	0	0	0	0	0	0	0	0	0	0	0	0
79778	MICALL2	0	0	1	79778	Gene_ID	H. sapiens	79778	H. sapiens	MICALL2	MICAL like 2	GO:1903955 positive regulation of protein targeting to mitochondrion;GO:1903749 positive regulation of establishment of protein localization to mitochondrion;GO:1903214 regulation of protein targeting to mitochondrion		Predicted intracellular proteins					0	0	0	0	0	0	0	0	0	0	0	0	0	0	1	0	0	0	0	0	0
59342	SCPEP1	1	0	0	59342	Gene_ID	H. sapiens	59342	H. sapiens	SCPEP1	serine carboxypeptidase 1	GO:0042573 retinoic acid metabolic process;GO:0045776 negative regulation of blood pressure;GO:0001523 retinoid metabolic process		Predicted intracellular proteins; Predicted secreted proteins; Enzymes; Peptidases:Serine-type peptidases	Golgi apparatus (Approved)	L-BENZYLSUCCINIC ACID			0	0	0	0	0	0	0	0	0	0	0	0	0	0	0	0	0	0	0	0	1
55003	PAK1IP1	0	0	1	55003	Gene_ID	H. sapiens	55003	H. sapiens	PAK1IP1	PAK1 interacting protein 1	GO:0042273 ribosomal large subunit biogenesis;GO:0060021 roof of mouth development;GO:1901796 regulation of signal transduction by p53 class mediator		Predicted intracellular proteins	Nucleoli (Supported)				0	0	0	0	0	0	0	1	0	0	0	0	0	0	0	0	0	0	0	0	0
202018	TAPT1	0	0	1	202018	Gene_ID	H. sapiens	202018	H. sapiens	TAPT1	transmembrane anterior posterior transformation 1	GO:1903012 positive regulation of bone development;GO:1903010 regulation of bone development;GO:0035437 maintenance of protein localization in endoplasmic reticulum		Disease related genes	Vesicles (Uncertain)				0	0	0	0	0	0	0	0	0	0	0	0	0	0	0	0	0	1	0	0	0
79752	ZFAND1	0	0	1	79752	Gene_ID	H. sapiens	79752	H. sapiens	ZFAND1	zinc finger AN1-type containing 1	GO:1903842 response to arsenite ion;GO:1903843 cellular response to arsenite ion;GO:0035617 stress granule disassembly		Predicted intracellular proteins	Centrosome;Cytosol (Approved)				0	0	0	0	0	0	0	0	0	0	0	0	0	0	1	0	0	0	0	0	0
11260	XPOT	0	0	1	11260	Gene_ID	H. sapiens	11260	H. sapiens	XPOT	exportin for tRNA	GO:0071528 tRNA re-export from nucleus;GO:0006409 tRNA export from nucleus;GO:0071431 tRNA-containing ribonucleoprotein complex export from nucleus		Predicted intracellular proteins; Transporters:Transporter channels and pores	Nucleoplasm (Enhanced); Additional: Cytosol			(M5922)HALLMARK UNFOLDED PROTEIN RESPONSE; (M5926)HALLMARK MYC TARGETS V1	0	0	0	0	0	0	0	0	0	0	0	1	0	0	0	0	0	0	0	0	0
150538	SATB2-AS1	0	0	1	150538	Gene_ID	H. sapiens	150538	H. sapiens	SATB2-AS1	SATB2 antisense RNA 1								0	0	0	0	0	0	0	0	0	0	0	0	0	0	0	0	0	0	0	0	0
6541	SLC7A1	0	0	1	6541	Gene_ID	H. sapiens	6541	H. sapiens	SLC7A1	solute carrier family 7 member 1	GO:1903810 L-histidine import across plasma membrane;GO:0015819 lysine transport;GO:0097638 L-arginine import across plasma membrane		Transporters:Electrochemical Potential-driven transporters		L-Lysine; Arginine; Ornithine		(M5942)HALLMARK UV RESPONSE DN; (M5901)HALLMARK G2M CHECKPOINT; (M5932)HALLMARK INFLAMMATORY RESPONSE	0	0	0	0	0	0	0	0	0	0	0	0	0	0	0	0	0	0	0	0	0
10797	MTHFD2	0	0	1	10797	Gene_ID	H. sapiens	10797	H. sapiens	MTHFD2	methylenetetrahydrofolate dehydrogenase (NADP+ dependent) 2, methenyltetrahydrofolate cyclohydrolase	GO:0035999 tetrahydrofolate interconversion;GO:0046655 folic acid metabolic process;GO:0046653 tetrahydrofolate metabolic process		ENZYME proteins:Oxidoreductases; Predicted intracellular proteins; Enzymes; ENZYME proteins:Hydrolases	Mitochondria (Supported)	Tetrahydrofolic acid; NADH		(M5922)HALLMARK UNFOLDED PROTEIN RESPONSE; (M5913)HALLMARK INTERFERON GAMMA RESPONSE; (M5924)HALLMARK MTORC1 SIGNALING	0	0	0	0	0	0	0	0	0	0	0	0	0	0	0	0	0	0	0	0	0
79023	NUP37	0	0	1	79023	Gene_ID	H. sapiens	79023	H. sapiens	NUP37	nucleoporin 37	GO:0051028 mRNA transport;GO:0050657 nucleic acid transport;GO:0050658 RNA transport		Predicted intracellular proteins; Transporters:Transporter channels and pores	Nucleoplasm (Approved)				1	0	0	0	1	1	0	0	0	0	0	1	0	0	0	0	0	0	0	0	0
6388	SDF2	1	0	0	6388	Gene_ID	H. sapiens	6388	H. sapiens	SDF2	stromal cell derived factor 2	GO:0051085 chaperone cofactor-dependent protein refolding;GO:0051084 'de novo' posttranslational protein folding;GO:0006458 'de novo' protein folding		Predicted intracellular proteins	Vesicles (Approved)	Malonate Ion			0	0	0	0	0	0	0	0	0	0	0	0	0	0	0	0	0	0	0	0	1
11335	CBX3	0	0	1	11335	Gene_ID	H. sapiens	11335	H. sapiens	CBX3	chromobox 3	GO:0006338 chromatin remodeling;GO:0048511 rhythmic process;GO:0006325 chromatin organization		Predicted intracellular proteins	Nucleoplasm (Supported); Additional: Nuclear bodies			(M5928)HALLMARK MYC TARGETS V2; (M5926)HALLMARK MYC TARGETS V1	0	1	0	0	1	0	0	0	0	0	0	0	0	0	0	0	0	0	0	0	0
9521	EEF1E1	0	0	1	9521	Gene_ID	H. sapiens	9521	H. sapiens	EEF1E1	eukaryotic translation elongation factor 1 epsilon 1	GO:0043517 positive regulation of DNA damage response, signal transduction by p53 class mediator;GO:2000774 positive regulation of cellular senescence;GO:0090343 positive regulation of cell aging		Predicted intracellular proteins	Cytosol;Nucleoplasm (Supported)			(M5924)HALLMARK MTORC1 SIGNALING	0	1	0	1	0	0	1	0	0	0	0	0	0	0	0	0	0	0	0	0	0
51130	ASB3	0	0	1	51130	Gene_ID	H. sapiens	51130	H. sapiens	ASB3	ankyrin repeat and SOCS box containing 3	GO:0036371 protein localization to T-tubule;GO:0055117 regulation of cardiac muscle contraction;GO:0006942 regulation of striated muscle contraction		Predicted intracellular proteins					0	0	0	0	0	0	0	0	0	0	0	0	0	0	1	0	0	0	0	0	0
51257	MARCHF2	1	0	0	51257	Gene_ID	H. sapiens	51257	H. sapiens	MARCHF2	membrane associated ring-CH-type finger 2	GO:0006897 endocytosis;GO:0016567 protein ubiquitination;GO:0032446 protein modification by small protein conjugation		Predicted intracellular proteins; Enzymes; ENZYME proteins:Transferases	Endoplasmic reticulum (Supported); Additional: Cytosol			(M5945)HALLMARK HEME METABOLISM	0	0	0	0	0	0	0	0	0	0	0	0	0	0	0	0	0	0	0	0	1
3566	IL4R	0	0	1	3566	Gene_ID	H. sapiens	3566	H. sapiens	IL4R	interleukin 4 receptor	GO:0045626 negative regulation of T-helper 1 cell differentiation;GO:0002826 negative regulation of T-helper 1 type immune response;GO:0045630 positive regulation of T-helper 2 cell differentiation		CD markers; FDA approved drug targets:Biotech drugs; Predicted intracellular proteins; Cancer-related genes:Candidate cancer biomarkers; Predicted secreted proteins	Nucleoplasm;Plasma membrane (Approved); Additional: Centriolar satellite	AER001; Dupilumab	(M1718)SIG IL4RECEPTOR IN B LYPHOCYTES; (M28)PID IL4 2PATHWAY; (M19)PID P73PATHWAY	(M5897)HALLMARK IL6 JAK STAT3 SIGNALING; (M5911)HALLMARK INTERFERON ALPHA RESPONSE; (M5947)HALLMARK IL2 STAT5 SIGNALING	0	0	0	0	0	0	0	0	0	0	0	0	0	0	0	0	0	1	0	0	0
5870	RAB6A	0	0	1	5870	Gene_ID	H. sapiens	5870	H. sapiens	RAB6A	RAB6A, member RAS oncogene family	GO:0018125 peptidyl-cysteine methylation;GO:0072385 minus-end-directed organelle transport along microtubule;GO:0034498 early endosome to Golgi transport		Predicted intracellular proteins	Golgi apparatus (Approved)				0	0	0	0	0	0	0	0	0	0	0	0	0	0	0	0	0	0	1	0	0
53938	PPIL3	0	0	1	53938	Gene_ID	H. sapiens	53938	H. sapiens	PPIL3	peptidylprolyl isomerase like 3	GO:0000413 protein peptidyl-prolyl isomerization;GO:0018208 peptidyl-proline modification;GO:0006457 protein folding		Predicted intracellular proteins; ENZYME proteins:Isomerase; Enzymes	Nucleoplasm (Approved); Additional: Nucleoli				0	0	0	0	0	0	0	0	0	0	0	1	0	0	0	0	0	0	0	0	0
51663	ZFR	0	0	1	51663	Gene_ID	H. sapiens	51663	H. sapiens	ZFR	zinc finger RNA binding protein			Predicted intracellular proteins	Nucleoplasm (Approved)				0	0	0	0	0	0	0	0	0	0	0	0	0	0	0	0	0	0	0	0	0
9028	RHBDL1	1	0	0	9028	Gene_ID	H. sapiens	9028	H. sapiens	RHBDL1	rhomboid like 1	GO:0006508 proteolysis;GO:0019538 protein metabolic process;GO:0007165 signal transduction		Peptidases:Serine-type peptidases; Enzymes; ENZYME proteins:Hydrolases	Nucleoplasm (Approved)				0	0	0	0	0	0	0	0	0	0	0	0	0	0	0	0	0	0	0	0	1
4528	MTIF2	0	0	1	4528	Gene_ID	H. sapiens	4528	H. sapiens	MTIF2	mitochondrial translational initiation factor 2	GO:0070124 mitochondrial translational initiation;GO:0032790 ribosome disassembly;GO:0032543 mitochondrial translation		Predicted intracellular proteins	Mitochondria (Enhanced)			(M5950)HALLMARK ALLOGRAFT REJECTION	0	0	0	1	0	0	0	0	0	0	0	0	0	0	0	0	0	0	0	0	0
23357	ANGEL1	1	0	0	23357	Gene_ID	H. sapiens	23357	H. sapiens	ANGEL1	angel homolog 1	GO:0090503 RNA phosphodiester bond hydrolysis, exonucleolytic;GO:0090501 RNA phosphodiester bond hydrolysis;GO:0090305 nucleic acid phosphodiester bond hydrolysis		Predicted intracellular proteins	Nucleoplasm (Approved)				0	0	0	0	0	0	0	0	0	0	0	0	0	0	0	0	0	0	0	0	1
339344	MYPOP	0	0	1	339344	Gene_ID	H. sapiens	339344	H. sapiens	MYPOP	Myb related transcription factor, partner of profilin	GO:0000122 negative regulation of transcription by RNA polymerase II;GO:0045892 negative regulation of transcription, DNA-templated;GO:1903507 negative regulation of nucleic acid-templated transcription		Predicted intracellular proteins	Nucleoplasm (Approved)				0	0	0	0	0	0	0	0	0	0	0	0	0	0	0	0	0	0	0	0	0
1054	CEBPG	0	0	1	1054	Gene_ID	H. sapiens	1054	H. sapiens	CEBPG	CCAAT enhancer binding protein gamma	GO:0043353 enucleate erythrocyte differentiation;GO:0043388 positive regulation of DNA binding;GO:0042267 natural killer cell mediated cytotoxicity		Transcription factors:Basic domains; Predicted intracellular proteins	Nucleoplasm (Supported)			(M5922)HALLMARK UNFOLDED PROTEIN RESPONSE; (M5941)HALLMARK UV RESPONSE UP	1	1	0	0	0	0	0	0	0	0	0	0	1	0	0	0	0	1	0	0	0
9111	NMI	0	0	1	9111	Gene_ID	H. sapiens	9111	H. sapiens	NMI	N-myc and STAT interactor	GO:1902524 positive regulation of protein K48-linked ubiquitination;GO:0061945 regulation of protein K48-linked ubiquitination;GO:0032687 negative regulation of interferon-alpha production		Predicted intracellular proteins	Cytosol;Nucleoplasm (Supported)			(M5911)HALLMARK INTERFERON ALPHA RESPONSE; (M5913)HALLMARK INTERFERON GAMMA RESPONSE; (M5932)HALLMARK INFLAMMATORY RESPONSE	0	0	0	0	0	0	0	0	0	0	0	0	0	0	0	0	0	1	0	0	0
116985	ARAP1	0	0	1	116985	Gene_ID	H. sapiens	116985	H. sapiens	ARAP1	ArfGAP with RhoGAP domain, ankyrin repeat and PH domain 1	GO:0030037 actin filament reorganization involved in cell cycle;GO:0090527 actin filament reorganization;GO:0001921 positive regulation of receptor recycling		Predicted intracellular proteins	Nucleoplasm;Plasma membrane (Approved); Additional: Cytosol;Vesicles		(M68)PID RHOA REG PATHWAY; (M186)PID PDGFRB PATHWAY		0	0	0	0	0	1	0	0	0	1	0	0	0	1	0	1	0	0	0	0	0
10196	PRMT3	0	0	1	10196	Gene_ID	H. sapiens	10196	H. sapiens	PRMT3	protein arginine methyltransferase 3	GO:0045827 negative regulation of isoprenoid metabolic process;GO:1900053 negative regulation of retinoic acid biosynthetic process;GO:1900052 regulation of retinoic acid biosynthetic process		Predicted intracellular proteins		S-adenosyl-L-homocysteine		(M5928)HALLMARK MYC TARGETS V2	0	0	0	0	0	0	0	0	0	0	0	0	0	0	0	0	0	0	1	0	0
10111	RAD50	0	0	1	10111	Gene_ID	H. sapiens	10111	H. sapiens	RAD50	RAD50 double strand break repair protein	GO:0031860 telomeric 3' overhang formation;GO:0000019 regulation of mitotic recombination;GO:1904354 negative regulation of telomere capping		Predicted intracellular proteins; Disease related genes	Nucleoplasm (Supported)		(M258)PID BARD1 PATHWAY; (M84)PID ATM PATHWAY; (M1)PID FANCONI PATHWAY	(M5925)HALLMARK E2F TARGETS	1	1	0	0	1	1	0	0	0	0	0	0	0	1	0	0	1	0	0	0	0
399818	EEF1AKMT2	0	0	1	399818	Gene_ID	H. sapiens	399818	H. sapiens	EEF1AKMT2	EEF1A lysine methyltransferase 2	GO:0018026 peptidyl-lysine monomethylation;GO:0018027 peptidyl-lysine dimethylation;GO:0018022 peptidyl-lysine methylation		Predicted intracellular proteins	Nucleoplasm (Supported); Additional: Cytosol;Nuclear bodies;Vesicles				0	0	0	0	0	0	0	0	0	0	0	0	0	0	0	0	0	0	1	0	0
140609	NEK7	0	0	1	140609	Gene_ID	H. sapiens	140609	H. sapiens	NEK7	NIMA related kinase 7	GO:1904355 positive regulation of telomere capping;GO:1904353 regulation of telomere capping;GO:0032212 positive regulation of telomere maintenance via telomerase	NEK Ser/Thr protein kinase family	Kinases:NEK Ser/Thr protein kinases; ENZYME proteins:Transferases; Predicted intracellular proteins; Transporters:Transporter channels and pores; Enzymes	Nucleoplasm (Supported)			(M5942)HALLMARK UV RESPONSE DN; (M5945)HALLMARK HEME METABOLISM	0	1	0	0	0	1	0	0	0	0	0	0	0	0	0	0	0	0	0	0	0
8725	URI1	0	0	1	8725	Gene_ID	H. sapiens	8725	H. sapiens	URI1	URI1 prefoldin like chaperone	GO:0010923 negative regulation of phosphatase activity;GO:0035305 negative regulation of dephosphorylation;GO:0010921 regulation of phosphatase activity		Predicted intracellular proteins	Nucleoplasm (Supported); Additional: Cytosol				0	0	0	0	0	0	0	0	0	0	0	0	0	0	0	0	0	0	0	0	0
9849	ZNF518A	0	0	1	9849	Gene_ID	H. sapiens	9849	H. sapiens	ZNF518A	zinc finger protein 518A	GO:0006325 chromatin organization;GO:0051276 chromosome organization;GO:0006357 regulation of transcription by RNA polymerase II		Transcription factors:Zinc-coordinating DNA-binding domains; Predicted intracellular proteins	Nucleoplasm (Approved)				0	0	0	0	1	0	0	0	0	0	0	0	0	0	0	0	0	0	0	0	0
7572	ZNF24	0	0	1	7572	Gene_ID	H. sapiens	7572	H. sapiens	ZNF24	zinc finger protein 24	GO:0042552 myelination;GO:0007272 ensheathment of neurons;GO:0008366 axon ensheathment		Transcription factors:Zinc-coordinating DNA-binding domains; Predicted intracellular proteins	Nucleoplasm (Supported)				0	0	0	0	0	0	0	0	0	0	0	0	0	0	0	0	0	0	0	0	0
10554	AGPAT1	1	0	0	10554	Gene_ID	H. sapiens	10554	H. sapiens	AGPAT1	1-acylglycerol-3-phosphate O-acyltransferase 1	GO:0016024 CDP-diacylglycerol biosynthetic process;GO:0046341 CDP-diacylglycerol metabolic process;GO:0006654 phosphatidic acid biosynthetic process		Enzymes; ENZYME proteins:Transferases	Endoplasmic reticulum (Supported); Additional: Rods & Rings				0	0	0	0	0	0	0	0	0	0	0	0	0	1	0	0	0	0	0	0	1
55596	ZCCHC8	0	0	1	55596	Gene_ID	H. sapiens	55596	H. sapiens	ZCCHC8	zinc finger CCHC-type containing 8	GO:0016076 snRNA catabolic process;GO:0034661 ncRNA catabolic process;GO:0016073 snRNA metabolic process		Predicted intracellular proteins	Nucleoplasm (Enhanced)				0	0	0	0	0	0	0	1	0	0	0	0	0	0	0	0	0	0	0	0	0
10733	PLK4	1	0	0	10733	Gene_ID	H. sapiens	10733	H. sapiens	PLK4	polo like kinase 4	GO:0097742 de novo centriole assembly;GO:0098535 de novo centriole assembly involved in multi-ciliated epithelial cell differentiation;GO:0046601 positive regulation of centriole replication	Other	Disease related genes; ENZYME proteins:Transferases; Predicted intracellular proteins; Potential drug targets; Enzymes; Kinases	Centrosome;Cytosol (Supported)	Fostamatinib		(M5928)HALLMARK MYC TARGETS V2; (M5901)HALLMARK G2M CHECKPOINT; (M5907)HALLMARK ESTROGEN RESPONSE LATE	0	0	0	0	0	1	0	0	0	0	0	0	0	0	0	0	0	0	0	0	1
94101	ORMDL1	0	0	1	94101	Gene_ID	H. sapiens	94101	H. sapiens	ORMDL1	ORMDL sphingolipid biosynthesis regulator 1	GO:0090156 cellular sphingolipid homeostasis;GO:1900060 negative regulation of ceramide biosynthetic process;GO:0090155 negative regulation of sphingolipid biosynthetic process			Endoplasmic reticulum (Supported)				0	0	0	1	0	0	0	0	0	0	0	0	0	0	0	0	0	0	0	0	0
4035	LRP1	0	0	1	4035	Gene_ID	H. sapiens	4035	H. sapiens	LRP1	LDL receptor related protein 1	GO:0048687 positive regulation of sprouting of injured axon;GO:0048691 positive regulation of axon extension involved in regeneration;GO:0048674 collateral sprouting of injured axon		CD markers; Candidate cardiovascular disease genes; Disease related genes; Predicted intracellular proteins	Vesicles (Approved); Additional: Nucleoplasm	Antihemophilic factor, human recombinant; Tenecteplase; Coagulation Factor IX (Recombinant); Lanoteplase; Coagulation Factor IX Human; Lonoctocog alfa; Moroctocog alfa	(M159)PID AMB2 NEUTROPHILS PATHWAY; (M174)PID UPA UPAR PATHWAY; (M186)PID PDGFRB PATHWAY	(M5946)HALLMARK COAGULATION; (M5921)HALLMARK COMPLEMENT; (M5930)HALLMARK EPITHELIAL MESENCHYMAL TRANSITION	0	1	0	0	0	0	0	0	0	1	0	0	0	1	1	0	0	1	0	0	0
23513	SCRIB	0	0	1	23513	Gene_ID	H. sapiens	23513	H. sapiens	SCRIB	scribble planar cell polarity protein	GO:0098968 neurotransmitter receptor transport postsynaptic membrane to endosome;GO:0021747 cochlear nucleus development;GO:0016080 synaptic vesicle targeting		Predicted intracellular proteins; Disease related genes	Cell Junctions;Plasma membrane (Enhanced); Additional: Nucleoplasm;Rods & Rings				0	0	0	0	1	1	0	0	0	1	0	0	0	0	1	0	0	1	0	0	0
8798	DYRK4	0	0	1	8798	Gene_ID	H. sapiens	8798	H. sapiens	DYRK4	dual specificity tyrosine phosphorylation regulated kinase 4	GO:0018107 peptidyl-threonine phosphorylation;GO:0018210 peptidyl-threonine modification;GO:0018105 peptidyl-serine phosphorylation	CMGC Ser/Thr protein kinase family	Kinases:CMGC Ser/Thr protein kinases; Predicted intracellular proteins; Enzymes; ENZYME proteins:Transferases	Vesicles (Enhanced)				0	0	0	0	0	0	0	0	0	0	0	0	0	0	0	0	0	0	0	0	0
9021	SOCS3	1	0	0	9021	Gene_ID	H. sapiens	9021	H. sapiens	SOCS3	suppressor of cytokine signaling 3	GO:0060670 branching involved in labyrinthine layer morphogenesis;GO:0060707 trophoblast giant cell differentiation;GO:0042532 negative regulation of tyrosine phosphorylation of STAT protein		Predicted intracellular proteins; Disease related genes	Cytosol (Approved); Additional: Plasma membrane		(M233)PID EPO PATHWAY; (M196)PID IL23 PATHWAY; (M183)PID IL6 7 PATHWAY	(M5897)HALLMARK IL6 JAK STAT3 SIGNALING; (M5890)HALLMARK TNFA SIGNALING VIA NFKB; (M5913)HALLMARK INTERFERON GAMMA RESPONSE	0	0	0	0	1	0	0	0	0	0	0	0	0	1	0	0	0	0	0	0	1
5580	PRKCD	0	0	1	5580	Gene_ID	H. sapiens	5580	H. sapiens	PRKCD	protein kinase C delta	GO:1900161 regulation of phospholipid scramblase activity;GO:1900163 positive regulation of phospholipid scramblase activity;GO:2000752 regulation of glucosylceramide catabolic process	AGC Ser/Thr protein kinase family	Disease related genes; Kinases:AGC Ser/Thr protein kinases; ENZYME proteins:Transferases; Predicted intracellular proteins; Cancer-related genes:Mutational cancer driver genes; Potential drug targets; Enzymes	Cytosol (Enhanced); Additional: Endoplasmic reticulum;Golgi apparatus	13-Acetylphorbol; Ingenol mebutate; Fostamatinib	(M125)PID IGF1 PATHWAY; (M165)PID SYNDECAN 4 PATHWAY; (M275)PID ALPHA SYNUCLEIN PATHWAY	(M5941)HALLMARK UV RESPONSE UP; (M5921)HALLMARK COMPLEMENT	1	1	0	1	0	1	0	0	1	0	0	1	0	1	1	0	0	0	0	0	0
158219	TTC39B	0	0	1	158219	Gene_ID	H. sapiens	158219	H. sapiens	TTC39B	tetratricopeptide repeat domain 39B	GO:0010887 negative regulation of cholesterol storage;GO:0010885 regulation of cholesterol storage;GO:0010878 cholesterol storage		Predicted intracellular proteins	Endoplasmic reticulum (Approved)			(M5947)HALLMARK IL2 STAT5 SIGNALING	0	0	0	0	0	0	0	0	0	0	0	0	0	0	0	0	0	0	0	0	0
5983	RFC3	1	0	0	5983	Gene_ID	H. sapiens	5983	H. sapiens	RFC3	replication factor C subunit 3	GO:1900262 regulation of DNA-directed DNA polymerase activity;GO:1900264 positive regulation of DNA-directed DNA polymerase activity;GO:0006271 DNA strand elongation involved in DNA replication		Predicted intracellular proteins	Nucleoplasm;Vesicles (Supported)		(M46)PID ATR PATHWAY; (M1)PID FANCONI PATHWAY	(M5898)HALLMARK DNA REPAIR; (M5925)HALLMARK E2F TARGETS	0	1	0	0	1	1	0	0	0	0	0	0	0	0	0	0	1	0	0	0	1
114819	CROCCP3	0	0	1	114819	Gene_ID	H. sapiens	114819	H. sapiens	CROCCP3	CROCC pseudogene 3								0	0	0	0	0	0	0	0	0	0	0	0	0	0	0	0	0	0	0	0	0
80824	DUSP16	0	0	1	80824	Gene_ID	H. sapiens	80824	H. sapiens	DUSP16	dual specificity phosphatase 16	GO:0045208 MAPK phosphatase export from nucleus;GO:0045209 MAPK phosphatase export from nucleus, leptomycin B sensitive;GO:0045204 MAPK export from nucleus		Predicted intracellular proteins; Enzymes; ENZYME proteins:Hydrolases	Nucleoplasm (Supported)		(M76)PID P38 ALPHA BETA PATHWAY		0	0	0	0	0	0	0	0	0	0	0	0	0	1	0	0	0	0	0	0	0
3799	KIF5B	0	0	1	3799	Gene_ID	H. sapiens	3799	H. sapiens	KIF5B	kinesin family member 5B	GO:1905152 positive regulation of voltage-gated sodium channel activity;GO:1990049 retrograde neuronal dense core vesicle transport;GO:0098971 anterograde dendritic transport of neurotransmitter receptor complex		Predicted intracellular proteins; Cancer-related genes	Centriolar satellite;Cytosol (Enhanced)		(M266)PID NCADHERIN PATHWAY	(M5922)HALLMARK UNFOLDED PROTEIN RESPONSE; (M5893)HALLMARK MITOTIC SPINDLE; (M5901)HALLMARK G2M CHECKPOINT	0	0	0	0	0	1	0	0	0	0	0	0	0	1	1	0	0	0	0	0	0
219749	ZNF25	0	0	1	219749	Gene_ID	H. sapiens	219749	H. sapiens	ZNF25	zinc finger protein 25	GO:0000122 negative regulation of transcription by RNA polymerase II;GO:0045892 negative regulation of transcription, DNA-templated;GO:1903507 negative regulation of nucleic acid-templated transcription		Transcription factors:Zinc-coordinating DNA-binding domains; Predicted intracellular proteins	Golgi apparatus;Nucleoplasm (Approved)				0	0	0	0	0	0	0	0	0	0	0	0	0	0	0	0	0	0	0	0	0
192683	SCAMP5	0	0	1	192683	Gene_ID	H. sapiens	192683	H. sapiens	SCAMP5	secretory carrier membrane protein 5	GO:0045956 positive regulation of calcium ion-dependent exocytosis;GO:0017158 regulation of calcium ion-dependent exocytosis;GO:1903307 positive regulation of regulated secretory pathway		Transporters:Accessory Factors Involved in Transport; Predicted intracellular proteins					0	0	0	0	0	0	0	0	0	1	0	0	1	0	0	0	0	1	0	0	0
165324	UBXN2A	0	0	1	165324	Gene_ID	H. sapiens	165324	H. sapiens	UBXN2A	UBX domain protein 2A	GO:0031468 nuclear membrane reassembly;GO:0071763 nuclear membrane organization;GO:0006998 nuclear envelope organization		Predicted intracellular proteins	Centrosome (Approved)				0	0	0	0	0	0	0	0	0	0	0	0	0	0	0	0	0	0	0	0	0
22862	FNDC3A	0	0	1	22862	Gene_ID	H. sapiens	22862	H. sapiens	FNDC3A	fibronectin type III domain containing 3A	GO:0060009 Sertoli cell development;GO:0060008 Sertoli cell differentiation;GO:0008584 male gonad development		Predicted intracellular proteins	Centrosome;Golgi apparatus;Nucleoplasm (Approved); Additional: Cytosol				0	0	0	0	0	0	0	0	0	0	0	0	0	0	0	0	0	0	0	0	0
6880	TAF9	0	0	1	6880	Gene_ID	H. sapiens	6880	H. sapiens	TAF9	TATA-box binding protein associated factor 9	GO:0000492 box C/D snoRNP assembly;GO:0000491 small nucleolar ribonucleoprotein complex assembly;GO:1902166 negative regulation of intrinsic apoptotic signaling pathway in response to DNA damage by p53 class mediator		Predicted intracellular proteins	Nucleoplasm (Enhanced)		(M139)PID MYC PATHWAY; (M66)PID MYC ACTIV PATHWAY; (M145)PID P53 DOWNSTREAM PATHWAY	(M5898)HALLMARK DNA REPAIR	0	1	0	0	1	0	0	1	1	0	0	0	0	0	0	0	1	0	0	0	0
84901	NFATC2IP	0	0	1	84901	Gene_ID	H. sapiens	84901	H. sapiens	NFATC2IP	nuclear factor of activated T cells 2 interacting protein	GO:0001816 cytokine production;GO:0045944 positive regulation of transcription by RNA polymerase II;GO:0045893 positive regulation of transcription, DNA-templated		Predicted intracellular proteins	Nucleoplasm (Approved)				0	0	0	0	0	0	0	0	0	0	0	0	0	0	0	0	0	0	0	0	0
51187	RSL24D1	0	0	1	51187	Gene_ID	H. sapiens	51187	H. sapiens	RSL24D1	ribosomal L24 domain containing 1	GO:0042273 ribosomal large subunit biogenesis;GO:0042254 ribosome biogenesis;GO:0022613 ribonucleoprotein complex biogenesis		Ribosomal proteins; Predicted intracellular proteins	Nucleoli;Nucleoli rim;Nucleoplasm (Enhanced)	(S)-3-phenyllactic acid; Anisomycin; Puromycin			0	0	0	1	0	0	0	1	0	0	0	0	0	0	0	0	0	0	0	0	0
79183	TTPAL	1	0	0	79183	Gene_ID	H. sapiens	79183	H. sapiens	TTPAL	alpha tocopherol transfer protein like			Predicted intracellular proteins	Cytosol;Golgi apparatus (Approved)				0	0	0	0	0	0	0	0	0	0	0	0	0	0	0	0	0	0	0	0	1
340371	NRBP2	0	0	1	340371	Gene_ID	H. sapiens	340371	H. sapiens	NRBP2	nuclear receptor binding protein 2	GO:0016242 negative regulation of macroautophagy;GO:0010507 negative regulation of autophagy;GO:0006888 endoplasmic reticulum to Golgi vesicle-mediated transport	Other	Predicted intracellular proteins; Enzymes; Kinases	Cytosol (Approved)				0	0	0	0	0	0	0	0	0	0	0	0	0	0	0	0	0	0	0	0	0
10254	STAM2	0	0	1	10254	Gene_ID	H. sapiens	10254	H. sapiens	STAM2	signal transducing adaptor molecule 2	GO:0036258 multivesicular body assembly;GO:0036257 multivesicular body organization;GO:0007032 endosome organization		Predicted intracellular proteins	Vesicles (Supported); Additional: Cytosol;Nucleoplasm		(M122)PID IL2 1PATHWAY	(M5897)HALLMARK IL6 JAK STAT3 SIGNALING; (M5951)HALLMARK SPERMATOGENESIS	0	0	0	0	1	1	0	0	0	0	0	0	0	1	0	0	0	0	0	0	0
5612	THAP12	0	0	1	5612	Gene_ID	H. sapiens	5612	H. sapiens	THAP12	THAP domain containing 12	GO:0008285 negative regulation of cell population proliferation;GO:0042127 regulation of cell population proliferation;GO:0008283 cell population proliferation		Transcription factors:Zinc-coordinating DNA-binding domains	Nucleoplasm (Approved)				0	0	0	0	0	0	0	0	0	0	0	0	0	0	0	0	0	0	0	0	0
5900	RALGDS	0	0	1	5900	Gene_ID	H. sapiens	5900	H. sapiens	RALGDS	ral guanine nucleotide dissociation stimulator	GO:0007264 small GTPase mediated signal transduction;GO:0050790 regulation of catalytic activity;GO:0035556 intracellular signal transduction		Predicted intracellular proteins; RAS pathway related proteins	Nucleoplasm (Uncertain)		(M164)PID ERBB1 DOWNSTREAM PATHWAY	(M5939)HALLMARK P53 PATHWAY	0	0	0	0	0	0	0	0	1	0	0	0	0	1	0	1	0	0	0	0	0
1317	SLC31A1	0	0	1	1317	Gene_ID	H. sapiens	1317	H. sapiens	SLC31A1	solute carrier family 31 member 1	GO:0015679 plasma membrane copper ion transport;GO:0098705 copper ion import across plasma membrane;GO:0015677 copper ion import		Transporters:Transporter channels and pores				(M5932)HALLMARK INFLAMMATORY RESPONSE	0	0	0	0	0	0	0	0	0	0	0	0	0	0	0	0	0	0	0	0	0
55857	KIZ	0	0	1	55857	Gene_ID	H. sapiens	55857	H. sapiens	KIZ	kizuna centrosomal protein	GO:0007051 spindle organization;GO:0000226 microtubule cytoskeleton organization;GO:0007017 microtubule-based process		Predicted intracellular proteins; Disease related genes			(M129)PID PLK1 PATHWAY		0	0	0	0	0	0	0	0	0	0	0	0	0	0	0	0	0	0	0	0	0
29080	CCDC59	0	0	1	29080	Gene_ID	H. sapiens	29080	H. sapiens	CCDC59	coiled-coil domain containing 59			Predicted intracellular proteins	Nucleoli;Nucleoli rim (Approved); Additional: Nucleoplasm;Plasma membrane				0	0	0	0	0	0	0	0	0	0	0	0	0	0	0	0	0	0	0	0	0
5641	LGMN	0	1	0	5641	Gene_ID	H. sapiens	5641	H. sapiens	LGMN	legumain	GO:0006624 vacuolar protein processing;GO:0097264 self proteolysis;GO:0040015 negative regulation of multicellular organism growth		Predicted intracellular proteins; Peptidases:Cysteine-type peptidases; ENZYME proteins:Hydrolases; Cancer-related genes:Candidate cancer biomarkers; Enzymes	Vesicles (Approved); Additional: Nucleoplasm			(M5892)HALLMARK CHOLESTEROL HOMEOSTASIS; (M5946)HALLMARK COAGULATION; (M5921)HALLMARK COMPLEMENT	0	0	0	0	0	0	0	0	0	1	1	0	0	0	0	0	0	0	0	0	0
221443	OARD1	0	0	1	221443	Gene_ID	H. sapiens	221443	H. sapiens	OARD1	O-acyl-ADP-ribose deacylase 1	GO:0140291 peptidyl-glutamate ADP-deribosylation;GO:0051725 protein de-ADP-ribosylation;GO:0042278 purine nucleoside metabolic process		Predicted intracellular proteins	Nucleoli (Supported); Additional: Nucleoplasm				0	1	0	0	0	0	0	0	0	0	0	0	0	0	0	0	0	0	0	0	0
7494	XBP1	0	0	1	7494	Gene_ID	H. sapiens	7494	H. sapiens	XBP1	X-box binding protein 1	GO:1903489 positive regulation of lactation;GO:1990418 response to insulin-like growth factor stimulus;GO:0006990 positive regulation of transcription from RNA polymerase II promoter involved in unfolded protein response		Transcription factors:Basic domains; Predicted intracellular proteins; Disease related genes; Cancer-related genes:Candidate cancer biomarkers			(M285)PID HNF3A PATHWAY; (M200)PID ERA GENOMIC PATHWAY	(M5922)HALLMARK UNFOLDED PROTEIN RESPONSE; (M5947)HALLMARK IL2 STAT5 SIGNALING; (M5906)HALLMARK ESTROGEN RESPONSE EARLY	1	1	0	0	0	0	0	0	0	0	0	0	1	1	0	0	0	1	0	1	0
158427	TSTD2	0	0	1	158427	Gene_ID	H. sapiens	158427	H. sapiens	TSTD2	thiosulfate sulfurtransferase like domain containing 2	GO:0008150 biological_process		Predicted intracellular proteins	Nucleoplasm (Approved)				0	0	0	0	0	0	0	0	0	0	0	0	0	0	0	0	0	0	0	0	0
26523	AGO1	0	0	1	26523	Gene_ID	H. sapiens	26523	H. sapiens	AGO1	argonaute RISC component 1	GO:0090625 mRNA cleavage involved in gene silencing by siRNA;GO:0035279 mRNA cleavage involved in gene silencing by miRNA;GO:0098795 mRNA cleavage involved in gene silencing		Predicted intracellular proteins	Cytoplasmic bodies (Supported); Additional: Cytosol				1	0	0	1	1	0	0	1	0	0	0	0	0	0	0	0	0	0	0	0	0
10153	CEBPZ	0	0	1	10153	Gene_ID	H. sapiens	10153	H. sapiens	CEBPZ	CCAAT enhancer binding protein zeta	GO:0045944 positive regulation of transcription by RNA polymerase II;GO:0045893 positive regulation of transcription, DNA-templated;GO:1903508 positive regulation of nucleic acid-templated transcription		Predicted intracellular proteins	Vesicles (Approved); Additional: Nucleoplasm		(M145)PID P53 DOWNSTREAM PATHWAY		0	0	0	0	0	0	0	0	1	0	0	0	0	0	0	0	0	0	0	0	0
55327	LIN7C	0	0	1	55327	Gene_ID	H. sapiens	55327	H. sapiens	LIN7C	lin-7 homolog C, crumbs cell polarity complex component	GO:1903361 protein localization to basolateral plasma membrane;GO:0035090 maintenance of apical/basal cell polarity;GO:0045199 maintenance of epithelial cell apical/basal polarity		Predicted intracellular proteins					0	0	0	0	0	0	0	0	0	0	0	0	0	0	1	0	0	0	0	0	0
9652	TTC37	0	0	1	9652	Gene_ID	H. sapiens	9652	H. sapiens	TTC37	tetratricopeptide repeat domain 37	GO:0034427 nuclear-transcribed mRNA catabolic process, exonucleolytic, 3'-5';GO:0000291 nuclear-transcribed mRNA catabolic process, exonucleolytic;GO:0000956 nuclear-transcribed mRNA catabolic process		Predicted intracellular proteins; Disease related genes	Nucleoplasm (Supported); Additional: Cytosol			(M5922)HALLMARK UNFOLDED PROTEIN RESPONSE	0	0	0	0	0	0	0	0	0	0	0	1	0	0	0	0	0	0	0	0	0
10600	USP16	0	0	1	10600	Gene_ID	H. sapiens	10600	H. sapiens	USP16	ubiquitin specific peptidase 16	GO:0070537 histone H2A K63-linked deubiquitination;GO:0045901 positive regulation of translational elongation;GO:0035521 monoubiquitinated histone deubiquitination		Disease related genes; Predicted intracellular proteins; Peptidases:Cysteine-type peptidases; Potential drug targets; ENZYME proteins:Hydrolases; Enzymes	Cytosol;Nucleoplasm (Approved)			(M5921)HALLMARK COMPLEMENT	0	1	0	1	1	0	0	0	0	0	0	0	0	0	0	0	0	0	0	0	0
79896	THNSL1	1	0	0	79896	Gene_ID	H. sapiens	79896	H. sapiens	THNSL1	threonine synthase like 1	GO:0008150 biological_process		Predicted intracellular proteins	Cytosol;Nuclear bodies (Approved); Additional: Mitochondria				0	0	0	0	0	0	0	0	0	0	0	0	0	0	0	0	0	0	0	0	1
152100	CMC1	0	0	1	152100	Gene_ID	H. sapiens	152100	H. sapiens	CMC1	C-X9-C motif containing 1			Predicted intracellular proteins					0	0	0	0	0	0	0	0	0	0	0	0	0	0	0	0	0	0	0	0	0
10286	BCAS2	0	0	1	10286	Gene_ID	H. sapiens	10286	H. sapiens	BCAS2	BCAS2 pre-mRNA processing factor	GO:0000377 RNA splicing, via transesterification reactions with bulged adenosine as nucleophile;GO:0000398 mRNA splicing, via spliceosome;GO:0000375 RNA splicing, via transesterification reactions		Predicted intracellular proteins	Centrosome;Nuclear speckles (Supported)				0	0	0	0	0	0	0	0	0	0	0	1	0	0	0	0	0	0	0	0	0
23396	PIP5K1C	0	0	1	23396	Gene_ID	H. sapiens	23396	H. sapiens	PIP5K1C	phosphatidylinositol-4-phosphate 5-kinase type 1 gamma	GO:0034333 adherens junction assembly;GO:0072583 clathrin-dependent endocytosis;GO:0034332 adherens junction organization		Disease related genes; ENZYME proteins:Transferases; Predicted intracellular proteins; Potential drug targets; Enzymes	Cytosol;Nucleoplasm (Approved)		(M72)PID NECTIN PATHWAY; (M266)PID NCADHERIN PATHWAY; (M127)PID ERBB1 RECEPTOR PROXIMAL PATHWAY		0	0	0	0	0	0	0	0	0	1	0	0	0	1	0	0	0	0	0	0	0
1026	CDKN1A	0	0	1	1026	Gene_ID	H. sapiens	1026	H. sapiens	CDKN1A	cyclin dependent kinase inhibitor 1A	GO:1905179 negative regulation of cardiac muscle tissue regeneration;GO:0060574 intestinal epithelial cell maturation;GO:1905178 regulation of cardiac muscle tissue regeneration		Cancer-related genes:Mutated cancer genes; Cancer-related genes:Mutational cancer driver genes; Predicted intracellular proteins; Cancer-related genes:Candidate cancer biomarkers	Nuclear bodies;Nucleoplasm (Supported)	Arsenic trioxide	(M10154)SA G2 AND M PHASES; (M1529)SA G1 AND S PHASES; (M18895)SA TRKA RECEPTOR	(M5923)HALLMARK PI3K AKT MTOR SIGNALING; (M5902)HALLMARK APOPTOSIS; (M5890)HALLMARK TNFA SIGNALING VIA NFKB	1	1	0	0	1	1	0	0	1	0	0	0	0	1	0	1	0	0	0	1	0
4731	NDUFV3	1	0	0	4731	Gene_ID	H. sapiens	4731	H. sapiens	NDUFV3	NADH:ubiquinone oxidoreductase subunit V3	GO:0006120 mitochondrial electron transport, NADH to ubiquinone;GO:0019646 aerobic electron transport chain;GO:0042773 ATP synthesis coupled electron transport		FDA approved drug targets:Small molecule drugs; Predicted intracellular proteins	Mitochondria (Enhanced)	NADH; Ubidecarenone	(M285)PID HNF3A PATHWAY; (M200)PID ERA GENOMIC PATHWAY	(M5937)HALLMARK GLYCOLYSIS	0	0	0	0	0	0	0	0	0	0	0	0	0	0	0	0	0	0	0	0	1
493869	GPX8	0	0	1	493869	Gene_ID	H. sapiens	493869	H. sapiens	GPX8	glutathione peroxidase 8 (putative)	GO:0098869 cellular oxidant detoxification;GO:1990748 cellular detoxification;GO:0097237 cellular response to toxic substance		ENZYME proteins:Oxidoreductases; Predicted intracellular proteins; Enzymes	Cytosol;Plasma membrane (Approved); Additional: Actin filaments			(M5892)HALLMARK CHOLESTEROL HOMEOSTASIS	1	0	0	0	0	0	0	0	0	0	0	0	0	0	0	0	0	0	0	0	0
195828	ZNF367	1	0	0	195828	Gene_ID	H. sapiens	195828	H. sapiens	ZNF367	zinc finger protein 367	GO:0006357 regulation of transcription by RNA polymerase II;GO:0006366 transcription by RNA polymerase II;GO:0006355 regulation of transcription, DNA-templated		Predicted intracellular proteins	Nucleoplasm (Supported)				0	0	0	0	0	0	0	0	0	0	0	0	0	0	0	0	0	0	0	0	1
148189	LINC00662	0	0	1	148189	Gene_ID	H. sapiens	148189	H. sapiens	LINC00662	long intergenic non-protein coding RNA 662								0	0	0	0	0	0	0	0	0	0	0	0	0	0	0	0	0	0	0	0	0
54887	UHRF1BP1	0	0	1	54887	Gene_ID	H. sapiens	54887	H. sapiens	UHRF1BP1	UHRF1 binding protein 1			Predicted intracellular proteins	Nuclear membrane;Nucleoplasm (Approved); Additional: Cytosol				0	0	0	0	0	0	0	0	0	0	0	0	0	0	0	0	0	0	0	0	0
8567	MADD	0	0	1	8567	Gene_ID	H. sapiens	8567	H. sapiens	MADD	MAP kinase activating death domain	GO:0032483 regulation of Rab protein signal transduction;GO:0032482 Rab protein signal transduction;GO:1902041 regulation of extrinsic apoptotic signaling pathway via death domain receptors		Predicted intracellular proteins	Cytosol;Plasma membrane (Supported)		(M144)PID CERAMIDE PATHWAY; (M128)PID TNF PATHWAY; (M220)PID CASPASE PATHWAY	(M5902)HALLMARK APOPTOSIS	0	0	0	0	0	0	0	0	0	0	0	0	0	0	0	1	0	0	0	0	0
1471	CST3	1	0	0	1471	Gene_ID	H. sapiens	1471	H. sapiens	CST3	cystatin C	GO:0010711 negative regulation of collagen catabolic process;GO:0060311 negative regulation of elastin catabolic process;GO:0060313 negative regulation of blood vessel remodeling		Disease related genes; Predicted secreted proteins; Cancer-related genes:Candidate cancer biomarkers	Golgi apparatus;Vesicles (Supported)		(M3468)NABA ECM REGULATORS; (M5885)NABA MATRISOME ASSOCIATED; (M5889)NABA MATRISOME		0	0	0	0	1	0	0	0	0	0	0	0	0	0	0	0	0	0	0	0	1
4650	MYO9B	0	0	1	4650	Gene_ID	H. sapiens	4650	H. sapiens	MYO9B	myosin IXB	GO:0035385 Roundabout signaling pathway;GO:0032011 ARF protein signal transduction;GO:0035023 regulation of Rho protein signal transduction		Predicted intracellular proteins; Disease related genes	Cytosol (Supported)		(M68)PID RHOA REG PATHWAY	(M5893)HALLMARK MITOTIC SPINDLE	0	0	0	0	0	1	0	0	0	0	0	0	0	0	0	1	0	0	0	0	0
8379	MAD1L1	1	0	0	8379	Gene_ID	H. sapiens	8379	H. sapiens	MAD1L1	mitotic arrest deficient 1 like 1	GO:0090235 regulation of metaphase plate congression;GO:0051315 attachment of mitotic spindle microtubules to kinetochore;GO:0008608 attachment of spindle microtubules to kinetochore		Predicted intracellular proteins; Disease related genes	Nuclear membrane;Nucleoplasm (Supported)		(M195)PID CMYB PATHWAY		0	0	0	0	1	1	0	0	0	0	0	0	0	0	0	1	0	0	0	0	1
286467	FIRRE	1	0	0	286467	Gene_ID	H. sapiens	286467	H. sapiens	FIRRE	firre intergenic repeating RNA element								0	0	0	0	0	0	0	0	0	0	0	0	0	0	0	0	0	0	0	0	1
51465	UBE2J1	0	0	1	51465	Gene_ID	H. sapiens	51465	H. sapiens	UBE2J1	ubiquitin conjugating enzyme E2 J1	GO:1904153 negative regulation of retrograde protein transport, ER to cytosol;GO:0070862 negative regulation of protein exit from endoplasmic reticulum;GO:1904152 regulation of retrograde protein transport, ER to cytosol		Enzymes; ENZYME proteins:Transferases				(M5908)HALLMARK ANDROGEN RESPONSE	0	0	0	0	0	0	0	0	0	0	0	0	1	0	1	0	0	1	0	0	0
2790	GNG10	0	0	1	2790	Gene_ID	H. sapiens	2790	H. sapiens	GNG10	G protein subunit gamma 10	GO:0007186 G protein-coupled receptor signaling pathway;GO:0007165 signal transduction;GO:0023052 signaling		Predicted intracellular proteins; RAS pathway related proteins					0	0	0	0	1	0	0	0	0	0	0	0	0	1	0	0	0	0	0	0	0
5504	PPP1R2	0	0	1	5504	Gene_ID	H. sapiens	5504	H. sapiens	PPP1R2	protein phosphatase 1 regulatory inhibitor subunit 2	GO:0043666 regulation of phosphoprotein phosphatase activity;GO:0005977 glycogen metabolic process;GO:0006073 cellular glucan metabolic process		Predicted intracellular proteins	Nucleoplasm (Approved); Additional: Cytosol			(M5941)HALLMARK UV RESPONSE UP	0	0	0	0	0	0	0	0	0	0	0	0	0	0	0	0	0	0	0	0	0
8824	CES2	0	0	1	8824	Gene_ID	H. sapiens	8824	H. sapiens	CES2	carboxylesterase 2	GO:0006692 prostanoid metabolic process;GO:0006693 prostaglandin metabolic process;GO:0033559 unsaturated fatty acid metabolic process		Predicted intracellular proteins; Enzymes; ENZYME proteins:Hydrolases	Golgi apparatus (Approved); Additional: Cytosol;Endoplasmic reticulum		(M40)PID E2F PATHWAY		0	0	0	0	0	0	0	0	0	0	0	0	0	0	0	0	0	0	0	0	0
51633	OTUD6B	0	0	1	51633	Gene_ID	H. sapiens	51633	H. sapiens	OTUD6B	OTU deubiquitinase 6B	GO:0043248 proteasome assembly;GO:0016579 protein deubiquitination;GO:0070646 protein modification by small protein removal		Disease related genes; Predicted intracellular proteins; Potential drug targets; ENZYME proteins:Hydrolases; Enzymes	Cytosol;Golgi apparatus;Nucleoplasm (Approved)				0	0	0	0	0	0	0	0	0	0	0	0	0	0	0	0	0	0	0	0	0
79038	ZFYVE21	0	0	1	79038	Gene_ID	H. sapiens	79038	H. sapiens	ZFYVE21	zinc finger FYVE-type containing 21			Predicted intracellular proteins					0	0	0	0	0	0	0	0	0	0	0	0	0	0	0	0	0	0	0	0	0
57223	PPP4R3B	0	0	1	57223	Gene_ID	H. sapiens	57223	H. sapiens	PPP4R3B	protein phosphatase 4 regulatory subunit 3B	GO:0045722 positive regulation of gluconeogenesis;GO:0010907 positive regulation of glucose metabolic process;GO:0006111 regulation of gluconeogenesis		Predicted intracellular proteins	Nuclear speckles;Nucleoplasm (Supported); Additional: Centrosome				0	0	0	0	0	0	0	0	0	0	0	0	0	0	0	0	0	0	0	0	0
5495	PPM1B	0	0	1	5495	Gene_ID	H. sapiens	5495	H. sapiens	PPM1B	protein phosphatase, Mg2+/Mn2+ dependent 1B	GO:0006499 N-terminal protein myristoylation;GO:0018377 protein myristoylation;GO:0006498 N-terminal protein lipidation		Predicted intracellular proteins; Enzymes; ENZYME proteins:Hydrolases	Cytosol;Nucleoli (Approved)			(M5905)HALLMARK ADIPOGENESIS	0	0	0	0	0	0	0	0	0	0	0	0	0	1	0	0	0	1	0	0	0
144363	ETFRF1	0	0	1	144363	Gene_ID	H. sapiens	144363	H. sapiens	ETFRF1	electron transfer flavoprotein regulatory factor 1	GO:0022904 respiratory electron transport chain;GO:0022900 electron transport chain;GO:0045333 cellular respiration		Predicted intracellular proteins					0	0	0	0	0	0	0	0	0	0	0	0	0	0	0	0	0	0	0	0	0
1657	DMXL1	0	0	1	1657	Gene_ID	H. sapiens	1657	H. sapiens	DMXL1	Dmx like 1	GO:0007035 vacuolar acidification;GO:0051452 intracellular pH reduction;GO:0045851 pH reduction		Predicted intracellular proteins	Nucleoli (Approved); Additional: Cytosol				0	0	0	0	0	0	0	0	0	0	0	0	0	0	0	0	0	0	0	0	0
92106	OXNAD1	0	0	1	92106	Gene_ID	H. sapiens	92106	H. sapiens	OXNAD1	oxidoreductase NAD binding domain containing 1	GO:0008150 biological_process		Predicted intracellular proteins	Nucleoplasm (Approved)				0	0	0	0	0	0	0	0	0	0	0	0	0	0	0	0	0	0	0	0	0
101410538	MMP24OS	1	0	0	101410538	Gene_ID	H. sapiens	101410538	H. sapiens	MMP24OS	MMP24 opposite strand			Predicted intracellular proteins					0	0	0	0	0	0	0	0	0	0	0	0	0	0	0	0	0	0	0	0	1
6478	SIAH2	0	0	1	6478	Gene_ID	H. sapiens	6478	H. sapiens	SIAH2	siah E3 ubiquitin protein ligase 2	GO:1990000 amyloid fibril formation;GO:0043154 negative regulation of cysteine-type endopeptidase activity involved in apoptotic process;GO:2000117 negative regulation of cysteine-type endopeptidase activity		Predicted intracellular proteins; Enzymes; ENZYME proteins:Transferases	Nucleoplasm (Approved); Additional: Vesicles			(M5891)HALLMARK HYPOXIA; (M5906)HALLMARK ESTROGEN RESPONSE EARLY; (M5907)HALLMARK ESTROGEN RESPONSE LATE	0	0	0	0	1	0	0	0	1	0	0	0	0	0	0	1	0	0	0	0	0
132949	AASDH	0	0	1	132949	Gene_ID	H. sapiens	132949	H. sapiens	AASDH	aminoadipate-semialdehyde dehydrogenase	GO:0043041 amino acid activation for nonribosomal peptide biosynthetic process;GO:0019482 beta-alanine metabolic process;GO:0019184 nonribosomal peptide biosynthetic process		Predicted intracellular proteins					0	0	0	1	0	0	1	0	0	0	0	0	0	0	0	0	0	0	0	0	0
54851	ANKRD49	0	0	1	54851	Gene_ID	H. sapiens	54851	H. sapiens	ANKRD49	ankyrin repeat domain 49	GO:0007283 spermatogenesis;GO:0048232 male gamete generation;GO:0007276 gamete generation		Predicted intracellular proteins	Nucleoli;Nucleoplasm (Approved); Additional: Golgi apparatus				0	0	0	0	0	0	0	0	0	0	0	0	0	0	0	0	0	0	0	0	0
892	CCNC	0	0	1	892	Gene_ID	H. sapiens	892	H. sapiens	CCNC	cyclin C	GO:0045944 positive regulation of transcription by RNA polymerase II;GO:0045893 positive regulation of transcription, DNA-templated;GO:1903508 positive regulation of nucleic acid-templated transcription		Predicted intracellular proteins	Nucleoplasm (Supported); Additional: Cytosol				0	0	0	0	0	0	0	0	1	0	0	0	0	1	0	0	0	0	0	0	0
29083	GTPBP8	0	0	1	29083	Gene_ID	H. sapiens	29083	H. sapiens	GTPBP8	GTP binding protein 8 (putative)			Predicted intracellular proteins	Mitochondria (Enhanced)				0	0	0	0	0	0	0	0	0	0	0	0	0	0	0	0	0	0	0	0	0
1070	CETN3	0	0	1	1070	Gene_ID	H. sapiens	1070	H. sapiens	CETN3	centrin 3	GO:0051028 mRNA transport;GO:0007098 centrosome cycle;GO:0031023 microtubule organizing center organization		Predicted intracellular proteins	Centrosome (Supported)				0	0	0	0	0	0	0	0	0	0	0	0	0	1	0	0	0	0	0	0	0
7913	DEK	0	0	1	7913	Gene_ID	H. sapiens	7913	H. sapiens	DEK	DEK proto-oncogene	GO:2001032 regulation of double-strand break repair via nonhomologous end joining;GO:0006303 double-strand break repair via nonhomologous end joining;GO:2000779 regulation of double-strand break repair		Predicted intracellular proteins; Disease related genes; Cancer-related genes:Candidate cancer biomarkers	Nucleoplasm (Enhanced)			(M5925)HALLMARK E2F TARGETS; (M5926)HALLMARK MYC TARGETS V1	0	1	0	0	1	0	0	0	0	0	0	0	0	0	0	0	0	0	0	0	0
200916	RPL22L1	0	0	1	200916	Gene_ID	H. sapiens	200916	H. sapiens	RPL22L1	ribosomal protein L22 like 1	GO:0002181 cytoplasmic translation;GO:0006412 translation;GO:0043043 peptide biosynthetic process		Ribosomal proteins; Predicted intracellular proteins	Nucleoli;Nucleoli rim (Approved); Additional: Nucleoplasm				1	0	0	1	0	0	0	0	0	0	0	1	0	0	0	0	0	0	0	0	0
89941	RHOT2	0	0	1	89941	Gene_ID	H. sapiens	89941	H. sapiens	RHOT2	ras homolog family member T2	GO:0034643 establishment of mitochondrion localization, microtubule-mediated;GO:0047497 mitochondrion transport along microtubule;GO:0051654 establishment of mitochondrion localization		Predicted intracellular proteins	Mitochondria (Supported)			(M5902)HALLMARK APOPTOSIS; (M5893)HALLMARK MITOTIC SPINDLE; (M5936)HALLMARK OXIDATIVE PHOSPHORYLATION	0	0	0	0	0	1	0	0	0	0	0	0	0	1	0	1	0	0	0	0	0
10573	MRPL28	0	0	1	10573	Gene_ID	H. sapiens	10573	H. sapiens	MRPL28	mitochondrial ribosomal protein L28	GO:0006412 translation;GO:0043043 peptide biosynthetic process;GO:0043604 amide biosynthetic process		Ribosomal proteins; Predicted intracellular proteins	Mitochondria (Supported)				0	0	0	1	0	0	0	0	0	0	0	0	0	0	0	0	0	0	0	0	0
51701	NLK	1	0	0	51701	Gene_ID	H. sapiens	51701	H. sapiens	NLK	nemo like kinase	GO:0007223 Wnt signaling pathway, calcium modulating pathway;GO:0042501 serine phosphorylation of STAT protein;GO:0035567 non-canonical Wnt signaling pathway	CMGC Ser/Thr protein kinase family	Kinases:CMGC Ser/Thr protein kinases; Predicted intracellular proteins; Enzymes; ENZYME proteins:Transferases	Nucleoplasm (Approved); Additional: Cell Junctions;Nucleoli		(M23)PID WNT NONCANONICAL PATHWAY; (M70)PID PS1 PATHWAY; (M195)PID CMYB PATHWAY		0	0	0	0	1	0	0	0	1	0	0	0	0	0	0	1	0	0	0	0	1
6917	TCEA1	0	0	1	6917	Gene_ID	H. sapiens	6917	H. sapiens	TCEA1	transcription elongation factor A1	GO:1901917 regulation of exoribonuclease activity;GO:1901919 positive regulation of exoribonuclease activity;GO:1905779 positive regulation of exonuclease activity		Predicted intracellular proteins; Disease related genes; Cancer-related genes	Nucleoplasm (Supported); Additional: Nucleoli			(M5924)HALLMARK MTORC1 SIGNALING; (M5945)HALLMARK HEME METABOLISM	0	0	0	0	0	0	0	0	0	0	0	0	0	0	0	0	1	0	0	0	0
79731	NARS2	0	0	1	79731	Gene_ID	H. sapiens	79731	H. sapiens	NARS2	asparaginyl-tRNA synthetase 2, mitochondrial	GO:0006421 asparaginyl-tRNA aminoacylation;GO:0006418 tRNA aminoacylation for protein translation;GO:0043039 tRNA aminoacylation		Disease related genes; ENZYME proteins:Ligase; Predicted intracellular proteins; Potential drug targets; Enzymes	Mitochondria;Nucleoplasm (Approved); Additional: Cytosol	Asparagine			0	0	0	1	0	0	1	1	0	0	0	0	0	0	0	0	0	0	0	0	0
8340	H2BC13	1	0	0	8340	Gene_ID	H. sapiens	8340	H. sapiens	H2BC13	H2B clustered histone 13	GO:0006334 nucleosome assembly;GO:0031497 chromatin assembly;GO:0034728 nucleosome organization		Predicted intracellular proteins	Nucleoplasm (Approved); Additional: Cytosol				1	0	0	0	1	1	0	0	0	0	0	0	0	0	0	0	0	0	0	0	1
83939	EIF2A	0	0	1	83939	Gene_ID	H. sapiens	83939	H. sapiens	EIF2A	eukaryotic translation initiation factor 2A	GO:0032933 SREBP signaling pathway;GO:0071501 cellular response to sterol depletion;GO:0006991 response to sterol depletion		Predicted intracellular proteins	Cytosol;Mitochondria (Approved)		(M286)PID TGFBR PATHWAY		0	0	0	1	0	0	0	1	1	0	0	0	1	0	0	0	0	0	0	1	0
5119	CHMP1A	0	0	1	5119	Gene_ID	H. sapiens	5119	H. sapiens	CHMP1A	charged multivesicular body protein 1A	GO:1904896 ESCRT complex disassembly;GO:1904903 ESCRT III complex disassembly;GO:0007076 mitotic chromosome condensation		Predicted intracellular proteins; Disease related genes				(M5901)HALLMARK G2M CHECKPOINT	0	0	0	0	1	0	0	0	0	0	0	0	0	0	0	0	0	0	0	0	0
6144	RPL21	0	0	1	6144	Gene_ID	H. sapiens	6144	H. sapiens	RPL21	ribosomal protein L21	GO:0002181 cytoplasmic translation;GO:0006412 translation;GO:0043043 peptide biosynthetic process		Ribosomal proteins; Predicted intracellular proteins; Disease related genes	Cytosol;Endoplasmic reticulum;Nucleoli fibrillar center (Supported)				1	0	0	1	0	0	0	0	0	0	0	1	0	0	0	0	0	0	0	0	0
27244	SESN1	1	0	0	27244	Gene_ID	H. sapiens	27244	H. sapiens	SESN1	sestrin 1	GO:0071233 cellular response to leucine;GO:1990253 cellular response to leucine starvation;GO:0043201 response to leucine		ENZYME proteins:Oxidoreductases; Predicted intracellular proteins; Enzymes	Nucleoli fibrillar center (Supported); Additional: Nucleoplasm		(M145)PID P53 DOWNSTREAM PATHWAY	(M5939)HALLMARK P53 PATHWAY	1	0	1	0	0	0	0	0	1	0	0	0	0	1	0	0	0	0	0	1	1
80727	TTYH3	0	0	1	80727	Gene_ID	H. sapiens	80727	H. sapiens	TTYH3	tweety family member 3	GO:0006821 chloride transport;GO:0015698 inorganic anion transport;GO:0006820 anion transport							0	0	0	0	0	0	0	0	0	0	0	0	0	0	0	0	0	0	0	0	0
64105	CENPK	0	0	1	64105	Gene_ID	H. sapiens	64105	H. sapiens	CENPK	centromere protein K	GO:0051382 kinetochore assembly;GO:0051383 kinetochore organization;GO:0034508 centromere complex assembly		Predicted intracellular proteins; Disease related genes					0	0	0	0	1	1	0	0	0	0	0	0	0	0	0	0	0	0	0	0	0
3163	HMOX2	1	0	0	3163	Gene_ID	H. sapiens	3163	H. sapiens	HMOX2	heme oxygenase 2	GO:0006788 heme oxidation;GO:0042167 heme catabolic process;GO:0046149 pigment catabolic process		ENZYME proteins:Oxidoreductases; Predicted intracellular proteins; Enzymes	Cytosol;Vesicles (Approved)	NADH; Stannsoporfin		(M5938)HALLMARK REACTIVE OXYGEN SPECIES PATHWAY	1	0	0	0	0	1	0	0	0	0	0	0	0	0	0	0	0	0	0	0	1
267002	PGBD2	0	0	1	267002	Gene_ID	H. sapiens	267002	H. sapiens	PGBD2	piggyBac transposable element derived 2			Predicted intracellular proteins	Vesicles (Approved)				0	0	0	0	0	0	0	0	0	0	0	0	0	0	0	0	0	0	0	0	0
5534	PPP3R1	0	0	1	5534	Gene_ID	H. sapiens	5534	H. sapiens	PPP3R1	protein phosphatase 3 regulatory subunit B, alpha	GO:0099149 regulation of postsynaptic neurotransmitter receptor internalization;GO:0099170 postsynaptic modulation of chemical synaptic transmission;GO:0098884 postsynaptic neurotransmitter receptor internalization		Predicted intracellular proteins	Cytosol;Plasma membrane (Approved)	Myristic acid; Voclosporin	(M235)PID TCR CALCIUM PATHWAY; (M290)PID IL12 STAT4 PATHWAY; (M113)PID NFAT 3PATHWAY	(M5902)HALLMARK APOPTOSIS	0	0	0	0	0	0	0	0	1	1	0	0	0	1	0	0	0	0	0	0	0
9054	NFS1	1	0	0	9054	Gene_ID	H. sapiens	9054	H. sapiens	NFS1	NFS1 cysteine desulfurase	GO:0018282 metal incorporation into metallo-sulfur cluster;GO:0018283 iron incorporation into metallo-sulfur cluster;GO:0006777 Mo-molybdopterin cofactor biosynthetic process		Predicted intracellular proteins; Enzymes; ENZYME proteins:Transferases	Cytosol;Nucleoplasm (Supported)	Pyridoxal phosphate; Cysteine; Alanine		(M5934)HALLMARK XENOBIOTIC METABOLISM	0	0	0	0	0	0	0	0	0	0	0	0	0	0	0	0	0	0	0	0	1
57456	KIAA1143	0	0	1	57456	Gene_ID	H. sapiens	57456	H. sapiens	KIAA1143	KIAA1143			Predicted intracellular proteins	Nucleoplasm (Enhanced); Additional: Cytokinetic bridge				0	0	0	0	0	0	0	0	0	0	0	0	0	0	0	0	0	0	0	0	0
374395	TMEM179B	1	0	0	374395	Gene_ID	H. sapiens	374395	H. sapiens	TMEM179B	transmembrane protein 179B			Transporters	Nuclear speckles (Enhanced)				0	0	0	0	0	0	0	0	0	0	0	0	0	0	0	0	0	0	0	0	1
2058	EPRS1	0	0	1	2058	Gene_ID	H. sapiens	2058	H. sapiens	EPRS1	glutamyl-prolyl-tRNA synthetase 1	GO:0006424 glutamyl-tRNA aminoacylation;GO:0006433 prolyl-tRNA aminoacylation;GO:0140212 regulation of long-chain fatty acid import into cell		Predicted intracellular proteins; ENZYME proteins:Ligase; Enzymes	Cytosol (Enhanced)	Glutamic acid; Proline; 5'-O-(L-Prolylsulfamoyl)adenosine; 5'-O-(L-Cysteinylsulfamoyl)adenosine; 5'-O-(N-(Alanyl)sulfamoyl)adenosine		(M5924)HALLMARK MTORC1 SIGNALING; (M5926)HALLMARK MYC TARGETS V1	0	0	0	1	0	0	1	1	0	0	0	1	0	0	0	0	0	0	0	0	0
23466	CBX6	0	0	1	23466	Gene_ID	H. sapiens	23466	H. sapiens	CBX6	chromobox 6	GO:0006325 chromatin organization;GO:0051276 chromosome organization;GO:0000122 negative regulation of transcription by RNA polymerase II		Predicted intracellular proteins	Mitochondria;Nucleoplasm (Approved)				1	0	0	0	1	0	0	0	0	0	0	0	0	0	0	0	0	0	0	0	0
374354	NHLRC2	0	0	1	374354	Gene_ID	H. sapiens	374354	H. sapiens	NHLRC2	NHL repeat containing 2			Predicted intracellular proteins	Nucleoplasm (Approved)				0	0	0	0	0	0	0	0	0	0	0	0	0	0	0	0	0	0	0	0	0
83940	TATDN1	0	0	1	83940	Gene_ID	H. sapiens	83940	H. sapiens	TATDN1	TatD DNase domain containing 1	GO:0090305 nucleic acid phosphodiester bond hydrolysis;GO:0006259 DNA metabolic process;GO:0090304 nucleic acid metabolic process		Predicted intracellular proteins	Nucleoplasm (Supported)				0	0	0	0	0	0	0	0	0	0	0	0	0	0	0	0	0	0	0	0	0
22950	SLC4A1AP	0	0	1	22950	Gene_ID	H. sapiens	22950	H. sapiens	SLC4A1AP	solute carrier family 4 member 1 adaptor protein			Transporters:Primary Active Transporters; Predicted intracellular proteins	Nucleoplasm (Supported); Additional: Plasma membrane;Vesicles				0	0	0	0	0	0	0	0	0	0	0	0	0	0	0	0	0	0	0	0	0
55156	ARMC1	0	0	1	55156	Gene_ID	H. sapiens	55156	H. sapiens	ARMC1	armadillo repeat containing 1	GO:0048312 intracellular distribution of mitochondria;GO:0048311 mitochondrion distribution;GO:0051646 mitochondrion localization		Predicted intracellular proteins	Mitochondria (Approved)				0	0	0	0	0	0	0	0	0	0	0	0	0	0	0	0	0	0	0	0	0
7410	VAV2	0	0	1	7410	Gene_ID	H. sapiens	7410	H. sapiens	VAV2	vav guanine nucleotide exchange factor 2	GO:0038095 Fc-epsilon receptor signaling pathway;GO:0002433 immune response-regulating cell surface receptor signaling pathway involved in phagocytosis;GO:0038096 Fc-gamma receptor signaling pathway involved in phagocytosis		Predicted intracellular proteins	Vesicles (Approved)		(M273)PID EPHA2 FWD PATHWAY; (M17200)SA B CELL RECEPTOR COMPLEXES; (M72)PID NECTIN PATHWAY	(M5944)HALLMARK ANGIOGENESIS; (M5942)HALLMARK UV RESPONSE DN; (M5915)HALLMARK APICAL JUNCTION	0	0	0	0	0	1	0	0	1	0	0	0	0	1	0	1	0	0	0	0	0
87178	PNPT1	0	0	1	87178	Gene_ID	H. sapiens	87178	H. sapiens	PNPT1	polyribonucleotide nucleotidyltransferase 1	GO:0090616 mitochondrial mRNA 3'-end processing;GO:0097222 mitochondrial mRNA polyadenylation;GO:0090615 mitochondrial mRNA processing		Disease related genes; ENZYME proteins:Transferases; Predicted intracellular proteins; Potential drug targets; Enzymes	Mitochondria (Supported); Additional: Cytosol			(M5911)HALLMARK INTERFERON ALPHA RESPONSE; (M5913)HALLMARK INTERFERON GAMMA RESPONSE	0	1	0	1	0	0	0	1	0	0	0	0	0	0	0	0	0	1	0	0	0
1978	EIF4EBP1	0	0	1	1978	Gene_ID	H. sapiens	1978	H. sapiens	EIF4EBP1	eukaryotic translation initiation factor 4E binding protein 1	GO:0045947 negative regulation of translational initiation;GO:1990928 response to amino acid starvation;GO:0002931 response to ischemia		Predicted intracellular proteins; Cancer-related genes:Candidate cancer biomarkers	Cytosol;Nucleoplasm (Supported)		(M229)PID P38 ALPHA BETA DOWNSTREAM PATHWAY; (M16)PID INSULIN PATHWAY; (M121)PID MTOR 4PATHWAY	(M5922)HALLMARK UNFOLDED PROTEIN RESPONSE	0	0	0	1	0	0	0	0	0	0	0	0	0	1	0	0	0	0	0	1	0
10927	SPIN1	0	0	1	10927	Gene_ID	H. sapiens	10927	H. sapiens	SPIN1	spindlin 1	GO:0009303 rRNA transcription;GO:0098781 ncRNA transcription;GO:0030177 positive regulation of Wnt signaling pathway		Predicted intracellular proteins	Nucleoplasm (Supported)				0	0	0	0	1	0	0	0	0	0	0	0	0	0	0	0	0	0	0	0	0
64841	GNPNAT1	0	0	1	64841	Gene_ID	H. sapiens	64841	H. sapiens	GNPNAT1	glucosamine-phosphate N-acetyltransferase 1	GO:0006041 glucosamine metabolic process;GO:0006048 UDP-N-acetylglucosamine biosynthetic process;GO:0046349 amino sugar biosynthetic process		Predicted intracellular proteins; Enzymes; ENZYME proteins:Transferases					0	0	0	0	0	0	0	0	0	0	0	0	0	0	0	0	0	1	0	0	0
29761	USP25	0	0	1	29761	Gene_ID	H. sapiens	29761	H. sapiens	USP25	ubiquitin specific peptidase 25	GO:1904293 negative regulation of ERAD pathway;GO:1904292 regulation of ERAD pathway;GO:0070536 protein K63-linked deubiquitination		Predicted intracellular proteins; Peptidases:Cysteine-type peptidases; Enzymes; ENZYME proteins:Hydrolases	Cytosol (Supported)				0	1	0	0	1	0	0	0	0	0	0	0	1	0	0	0	0	0	0	0	0
1386	ATF2	0	0	1	1386	Gene_ID	H. sapiens	1386	H. sapiens	ATF2	activating transcription factor 2	GO:0021742 abducens nucleus development;GO:0021743 hypoglossal nucleus development;GO:0021754 facial nucleus development		Transcription factors:Basic domains; Predicted intracellular proteins; Enzymes; ENZYME proteins:Transferases	Nucleoplasm (Enhanced)		(M17200)SA B CELL RECEPTOR COMPLEXES; (M229)PID P38 ALPHA BETA DOWNSTREAM PATHWAY; (M12)PID RHOA PATHWAY		1	1	0	0	1	0	0	0	1	0	0	0	0	1	0	0	1	1	0	0	0
54482	TRMT13	0	0	1	54482	Gene_ID	H. sapiens	54482	H. sapiens	TRMT13	tRNA methyltransferase 13 homolog	GO:0030488 tRNA methylation;GO:0001510 RNA methylation;GO:0006400 tRNA modification		Predicted intracellular proteins; Enzymes; ENZYME proteins:Transferases	Nucleoplasm;Plasma membrane (Approved); Additional: Cytosol;Nuclear bodies				0	0	0	0	0	0	1	1	0	0	0	1	0	0	0	0	0	0	1	0	0
388789	SMIM26	0	0	1	388789	Gene_ID	H. sapiens	388789	H. sapiens	SMIM26	small integral membrane protein 26				Nucleoplasm (Approved); Additional: Cytosol				0	0	0	0	0	0	0	0	0	0	0	0	0	0	0	0	0	0	0	0	0
9538	EI24	1	0	0	9538	Gene_ID	H. sapiens	9538	H. sapiens	EI24	EI24 autophagy associated transmembrane protein	GO:0030308 negative regulation of cell growth;GO:0045926 negative regulation of growth;GO:0016236 macroautophagy		Disease related genes; Transporters:Electrochemical Potential-driven transporters; Predicted intracellular proteins; Potential drug targets; Cancer-related genes:Candidate cancer biomarkers	Cytosol;Endoplasmic reticulum (Supported); Additional: Golgi apparatus			(M5939)HALLMARK P53 PATHWAY	0	0	1	0	0	0	0	0	0	0	0	0	0	0	0	0	0	0	0	0	1
3017	H2BC5	1	0	0	3017	Gene_ID	H. sapiens	3017	H. sapiens	H2BC5	H2B clustered histone 5	GO:0006334 nucleosome assembly;GO:0031497 chromatin assembly;GO:0034728 nucleosome organization		Predicted intracellular proteins	Nucleoplasm (Approved); Additional: Cytosol				1	0	0	0	1	1	0	0	0	0	0	0	0	0	0	0	0	0	0	0	1
261726	TIPRL	0	0	1	261726	Gene_ID	H. sapiens	261726	H. sapiens	TIPRL	TOR signaling pathway regulator	GO:0032515 negative regulation of phosphoprotein phosphatase activity;GO:0035308 negative regulation of protein dephosphorylation;GO:0010923 negative regulation of phosphatase activity		Predicted intracellular proteins	Cytosol;Vesicles (Supported)				0	1	0	0	0	0	0	0	0	0	0	0	0	0	0	0	0	0	0	1	0
51022	GLRX2	0	0	1	51022	Gene_ID	H. sapiens	51022	H. sapiens	GLRX2	glutaredoxin 2	GO:0042262 DNA protection;GO:0051775 response to redox state;GO:0071450 cellular response to oxygen radical		Predicted intracellular proteins	Nucleoplasm (Supported); Additional: Vesicles	Glutathione		(M5938)HALLMARK REACTIVE OXYGEN SPECIES PATHWAY	0	0	0	0	0	0	0	0	0	0	0	0	0	0	0	0	0	0	0	1	0
8347	H2BC4	1	0	0	8347	Gene_ID	H. sapiens	8347	H. sapiens	H2BC4	H2B clustered histone 4	GO:0002227 innate immune response in mucosa;GO:0002385 mucosal immune response;GO:0002251 organ or tissue specific immune response		Predicted intracellular proteins	Nucleoplasm (Approved); Additional: Cytosol	Copper			1	0	1	0	1	1	0	0	0	0	0	0	0	0	0	0	0	0	0	0	1
9463	PICK1	1	0	0	9463	Gene_ID	H. sapiens	9463	H. sapiens	PICK1	protein interacting with PRKCA 1	GO:0034316 negative regulation of Arp2/3 complex-mediated actin nucleation;GO:0043045 DNA methylation involved in embryo development;GO:1901538 changes to DNA methylation involved in embryo development		Predicted intracellular proteins	Cytosol (Supported)			(M5909)HALLMARK MYOGENESIS	0	0	0	0	0	0	0	0	0	1	0	0	0	0	1	0	0	0	1	1	1
114971	PTPMT1	0	0	1	114971	Gene_ID	H. sapiens	114971	H. sapiens	PTPMT1	protein tyrosine phosphatase mitochondrial 1	GO:0032049 cardiolipin biosynthetic process;GO:0006655 phosphatidylglycerol biosynthetic process;GO:0032048 cardiolipin metabolic process		Predicted intracellular proteins; Enzymes; ENZYME proteins:Hydrolases	Mitochondria (Enhanced)				0	0	0	0	0	0	0	0	0	0	0	0	0	0	0	0	0	0	0	0	0
7869	SEMA3B	0	1	0	7869	Gene_ID	H. sapiens	7869	H. sapiens	SEMA3B	semaphorin 3B	GO:0061643 chemorepulsion of axon;GO:0048843 negative regulation of axon extension involved in axon guidance;GO:0048841 regulation of axon extension involved in axon guidance		Predicted intracellular proteins; Predicted secreted proteins; Cancer-related genes:Candidate cancer biomarkers			(M5880)NABA ECM AFFILIATED; (M5885)NABA MATRISOME ASSOCIATED; (M5889)NABA MATRISOME	(M5892)HALLMARK CHOLESTEROL HOMEOSTASIS; (M5906)HALLMARK ESTROGEN RESPONSE EARLY; (M5907)HALLMARK ESTROGEN RESPONSE LATE	0	0	0	0	0	0	0	0	0	0	0	0	0	0	0	0	0	0	0	0	0
100529063	BCL2L2-PABPN1	0	0	1	100529063	Gene_ID	H. sapiens	100529063	H. sapiens	BCL2L2-PABPN1	BCL2L2-PABPN1 readthrough			Predicted intracellular proteins; Transporters:Transporter channels and pores; Cancer-related genes:Candidate cancer biomarkers	Nucleoplasm (Uncertain); Additional: Nuclear speckles				0	0	0	0	0	0	0	0	0	0	0	0	0	0	0	0	0	0	0	0	0
6670	SP3	0	0	1	6670	Gene_ID	H. sapiens	6670	H. sapiens	SP3	Sp3 transcription factor	GO:0060136 embryonic process involved in female pregnancy;GO:0043353 enucleate erythrocyte differentiation;GO:0001829 trophectodermal cell differentiation		Transcription factors:Zinc-coordinating DNA-binding domains; Predicted intracellular proteins	Nucleoplasm (Supported)		(M105)PID TELOMERASE PATHWAY; (M2)PID SMAD2 3NUCLEAR PATHWAY		0	0	0	0	0	0	0	0	1	0	0	0	0	1	0	0	0	1	0	0	0
143684	FAM76B	0	0	1	143684	Gene_ID	H. sapiens	143684	H. sapiens	FAM76B	family with sequence similarity 76 member B			Predicted intracellular proteins	Nucleoplasm (Approved); Additional: Nucleoli fibrillar center				0	0	0	0	0	0	0	0	0	0	0	0	0	0	0	0	0	0	0	0	0
55191	NADSYN1	1	0	0	55191	Gene_ID	H. sapiens	55191	H. sapiens	NADSYN1	NAD synthetase 1	GO:0034627 'de novo' NAD biosynthetic process;GO:0009435 NAD biosynthetic process;GO:0019359 nicotinamide nucleotide biosynthetic process		Predicted intracellular proteins; ENZYME proteins:Ligase; Enzymes	Vesicles (Approved); Additional: Cytosol;Golgi apparatus	Glutamic acid		(M5906)HALLMARK ESTROGEN RESPONSE EARLY	0	0	0	0	0	0	0	0	0	0	0	0	0	0	0	0	0	0	0	0	1
25912	C1orf43	0	0	1	25912	Gene_ID	H. sapiens	25912	H. sapiens	C1orf43	chromosome 1 open reading frame 43	GO:0006909 phagocytosis;GO:0016192 vesicle-mediated transport;GO:0006810 transport		Predicted intracellular proteins					0	0	0	0	0	0	0	0	0	0	0	0	0	0	0	0	0	0	0	0	0
2760	GM2A	0	1	0	2760	Gene_ID	H. sapiens	2760	H. sapiens	GM2A	GM2 ganglioside activator	GO:0006689 ganglioside catabolic process;GO:0009313 oligosaccharide catabolic process;GO:0046479 glycosphingolipid catabolic process		Predicted intracellular proteins; Disease related genes	Cytosol;Vesicles (Approved)	Platelet Activating Factor; Lauric acid; Lpc-Ether; Choline alfoscerate; Myristic acid		(M5939)HALLMARK P53 PATHWAY	0	0	0	0	0	0	0	0	0	0	1	0	0	0	0	0	0	0	0	0	0
2764	GMFB	0	0	1	2764	Gene_ID	H. sapiens	2764	H. sapiens	GMFB	glia maturation factor beta	GO:0071846 actin filament debranching;GO:0034316 negative regulation of Arp2/3 complex-mediated actin nucleation;GO:0051126 negative regulation of actin nucleation		Predicted intracellular proteins	Cytosol;Nucleoplasm (Approved); Additional: Nuclear bodies			(M5921)HALLMARK COMPLEMENT	0	0	0	0	0	0	0	0	0	0	0	0	0	0	0	0	0	0	0	0	0
5000	ORC4	0	0	1	5000	Gene_ID	H. sapiens	5000	H. sapiens	ORC4	origin recognition complex subunit 4	GO:0006270 DNA replication initiation;GO:0006261 DNA-dependent DNA replication;GO:0006260 DNA replication		Predicted intracellular proteins; Disease related genes	Nucleoli;Nucleoplasm (Supported)				0	0	0	0	0	1	0	0	0	0	0	0	0	0	0	0	0	0	0	0	0
64431	ACTR6	0	0	1	64431	Gene_ID	H. sapiens	64431	H. sapiens	ACTR6	actin related protein 6	GO:0043486 histone exchange;GO:0034728 nucleosome organization;GO:0071824 protein-DNA complex subunit organization		Predicted intracellular proteins	Cytosol;Plasma membrane (Approved)				0	0	0	0	1	0	0	0	0	0	0	0	0	0	0	0	0	0	0	0	0
91408	BTF3L4	0	0	1	91408	Gene_ID	H. sapiens	91408	H. sapiens	BTF3L4	basic transcription factor 3 like 4			Predicted intracellular proteins	Cytosol;Nucleoplasm (Approved)				0	0	0	0	0	0	0	0	0	0	0	0	0	0	0	0	0	0	0	0	0
54956	PARP16	0	0	1	54956	Gene_ID	H. sapiens	54956	H. sapiens	PARP16	poly(ADP-ribose) polymerase family member 16	GO:0034356 NAD biosynthesis via nicotinamide riboside salvage pathway;GO:0070213 protein auto-ADP-ribosylation;GO:0140289 protein mono-ADP-ribosylation		Enzymes; ENZYME proteins:Transferases					0	0	0	0	0	0	0	0	0	0	0	0	1	0	0	0	0	0	0	0	0
3008	H1-4	0	0	1	3008	Gene_ID	H. sapiens	3008	H. sapiens	H1-4	H1.4 linker histone, cluster member	GO:0016584 nucleosome positioning;GO:0045910 negative regulation of DNA recombination;GO:0030261 chromosome condensation		Cancer-related genes:Mutated cancer genes; Predicted intracellular proteins; Disease related genes	Nuclear speckles (Supported)	Copper	(M32)PID HDAC CLASSIII PATHWAY		1	1	0	0	1	0	0	0	0	0	0	0	0	0	0	0	0	0	0	0	0
9294	S1PR2	0	0	1	9294	Gene_ID	H. sapiens	9294	H. sapiens	S1PR2	sphingosine-1-phosphate receptor 2	GO:1901552 positive regulation of endothelial cell development;GO:1903142 positive regulation of establishment of endothelial barrier;GO:0090394 negative regulation of excitatory postsynaptic potential		Potential drug targets; Disease related genes; G-protein coupled receptors:GPCRs excl olfactory receptors; G-protein coupled receptors:Lysolipids receptors	Golgi apparatus (Uncertain); Additional: Nuclear speckles		(M155)PID S1P META PATHWAY; (M268)PID S1P S1P2 PATHWAY; (M55)PID S1P S1P3 PATHWAY		0	0	0	0	0	0	0	0	0	0	0	0	0	0	0	0	0	0	0	0	0
51175	TUBE1	0	0	1	51175	Gene_ID	H. sapiens	51175	H. sapiens	TUBE1	tubulin epsilon 1	GO:0007098 centrosome cycle;GO:0031023 microtubule organizing center organization;GO:0000226 microtubule cytoskeleton organization		FDA approved drug targets:Small molecule drugs; Predicted intracellular proteins		Vinblastine			0	0	0	0	0	0	0	0	0	0	0	0	0	0	0	0	0	0	0	0	0
20	ABCA2	0	0	1	20	Gene_ID	H. sapiens	20	H. sapiens	ABCA2	ATP binding cassette subfamily A member 2	GO:0150110 negative regulation of cholesterol esterification;GO:0032805 positive regulation of low-density lipoprotein particle receptor catabolic process;GO:0099040 ceramide translocation		Transporters:Primary Active Transporters; Predicted intracellular proteins				(M5892)HALLMARK CHOLESTEROL HOMEOSTASIS; (M5948)HALLMARK BILE ACID METABOLISM	0	0	0	1	0	0	0	0	0	1	0	0	0	0	1	0	0	0	0	0	0
7398	USP1	0	0	1	7398	Gene_ID	H. sapiens	7398	H. sapiens	USP1	ubiquitin specific peptidase 1	GO:0035520 monoubiquitinated protein deubiquitination;GO:0042769 DNA damage response, detection of DNA damage;GO:0006282 regulation of DNA repair		Predicted intracellular proteins; Peptidases:Cysteine-type peptidases; Enzymes; ENZYME proteins:Hydrolases	Nucleoplasm (Supported)		(M1)PID FANCONI PATHWAY	(M5925)HALLMARK E2F TARGETS; (M5926)HALLMARK MYC TARGETS V1	0	1	0	0	0	0	0	0	0	0	0	0	0	0	0	0	1	0	0	0	0
285605	DTWD2	0	0	1	285605	Gene_ID	H. sapiens	285605	H. sapiens	DTWD2	DTW domain containing 2	GO:0006400 tRNA modification;GO:0008033 tRNA processing;GO:0009451 RNA modification		Predicted intracellular proteins	Nuclear bodies (Approved)				0	0	0	0	0	0	1	1	0	0	0	0	0	0	0	0	0	0	0	0	0
7341	SUMO1	0	0	1	7341	Gene_ID	H. sapiens	7341	H. sapiens	SUMO1	small ubiquitin like modifier 1	GO:0010621 negative regulation of transcription by transcription factor localization;GO:0045759 negative regulation of action potential;GO:0042308 negative regulation of protein import into nucleus		Predicted intracellular proteins; Disease related genes	Nuclear membrane;Nucleoplasm (Supported); Additional: Nuclear bodies;Nucleoli		(M140)PID RANBP2 PATHWAY; (M30)PID HDAC CLASSII PATHWAY; (M101)PID HDAC CLASSI PATHWAY		0	1	0	0	0	1	0	0	1	0	0	0	0	0	1	0	1	0	0	0	0
84259	DCUN1D5	0	0	1	84259	Gene_ID	H. sapiens	84259	H. sapiens	DCUN1D5	defective in cullin neddylation 1 domain containing 5	GO:2000436 positive regulation of protein neddylation;GO:2000434 regulation of protein neddylation;GO:0045116 protein neddylation		Predicted intracellular proteins	Nucleoli (Approved); Additional: Nucleoplasm				0	1	0	0	0	0	0	0	0	0	0	0	0	0	0	0	0	0	0	0	0
493856	CISD2	0	0	1	493856	Gene_ID	H. sapiens	493856	H. sapiens	CISD2	CDGSH iron sulfur domain 2	GO:0010259 multicellular organism aging;GO:0000422 autophagy of mitochondrion;GO:0061726 mitochondrion disassembly		Disease related genes	Endoplasmic reticulum (Supported)				0	0	0	0	0	0	0	0	0	0	0	0	0	0	0	0	0	0	0	0	0
26829	RNU5E-1	0	0	1	26829	Gene_ID	H. sapiens	26829	H. sapiens	RNU5E-1	RNA, U5E small nuclear 1	GO:0000353 formation of quadruple SL/U4/U5/U6 snRNP;GO:0000365 mRNA trans splicing, via spliceosome;GO:0045291 mRNA trans splicing, SL addition							0	0	0	0	0	0	0	1	0	0	0	0	0	0	0	0	0	0	0	0	0
6305	SBF1	0	0	1	6305	Gene_ID	H. sapiens	6305	H. sapiens	SBF1	SET binding factor 1	GO:0007286 spermatid development;GO:0048515 spermatid differentiation;GO:0007281 germ cell development		Predicted intracellular proteins; Disease related genes	Nuclear bodies (Supported)				0	0	0	0	0	0	0	0	0	0	0	0	0	0	0	0	0	0	0	0	0
55278	QRSL1	0	0	1	55278	Gene_ID	H. sapiens	55278	H. sapiens	QRSL1	glutaminyl-tRNA amidotransferase subunit QRSL1	GO:0070681 glutaminyl-tRNAGln biosynthesis via transamidation;GO:0043039 tRNA aminoacylation;GO:0043038 amino acid activation		Disease related genes; ENZYME proteins:Ligase; Predicted intracellular proteins; Potential drug targets; Enzymes	Vesicles (Approved); Additional: Centrosome				0	0	0	1	0	0	1	1	0	0	0	0	0	0	0	0	0	0	0	0	0
8624	PSMG1	0	0	1	8624	Gene_ID	H. sapiens	8624	H. sapiens	PSMG1	proteasome assembly chaperone 1	GO:0080129 proteasome core complex assembly;GO:0043248 proteasome assembly;GO:0021924 cell proliferation in external granule layer		Predicted intracellular proteins	Cytosol;Golgi apparatus;Nucleoplasm (Enhanced)			(M5951)HALLMARK SPERMATOGENESIS; (M5924)HALLMARK MTORC1 SIGNALING	0	0	0	0	0	0	0	0	0	0	0	0	0	0	0	0	0	0	0	0	0
1287	COL4A5	1	0	0	1287	Gene_ID	H. sapiens	1287	H. sapiens	COL4A5	collagen type IV alpha 5 chain	GO:0038063 collagen-activated tyrosine kinase receptor signaling pathway;GO:0038065 collagen-activated signaling pathway;GO:0007528 neuromuscular junction development		Predicted intracellular proteins; Disease related genes; Predicted secreted proteins; Cancer-related genes:Candidate cancer biomarkers	Plasma membrane (Approved); Additional: Vesicles		(M5887)NABA BASEMENT MEMBRANES; (M53)PID INTEGRIN3 PATHWAY; (M3005)NABA COLLAGENS		0	0	0	0	0	0	0	0	0	0	0	0	0	1	0	0	0	0	0	0	1
6897	TARS1	0	0	1	6897	Gene_ID	H. sapiens	6897	H. sapiens	TARS1	threonyl-tRNA synthetase 1	GO:0006435 threonyl-tRNA aminoacylation;GO:0006418 tRNA aminoacylation for protein translation;GO:0043039 tRNA aminoacylation		Predicted intracellular proteins; ENZYME proteins:Ligase; Enzymes	Cytosol (Approved); Additional: Actin filaments	Threonine		(M5922)HALLMARK UNFOLDED PROTEIN RESPONSE; (M5941)HALLMARK UV RESPONSE UP	0	0	0	1	0	0	1	1	0	0	0	0	0	0	0	0	0	0	0	0	0
6621	SNAPC4	0	0	1	6621	Gene_ID	H. sapiens	6621	H. sapiens	SNAPC4	small nuclear RNA activating complex polypeptide 4	GO:0042796 snRNA transcription by RNA polymerase III;GO:0042795 snRNA transcription by RNA polymerase II;GO:0009301 snRNA transcription		Predicted intracellular proteins; Transcription factors:Helix-turn-helix domains	Nuclear membrane;Nucleoplasm (Approved)			(M5898)HALLMARK DNA REPAIR	0	0	0	0	0	0	0	0	0	0	0	0	0	0	0	0	0	0	0	0	0
153241	CEP120	0	0	1	153241	Gene_ID	H. sapiens	153241	H. sapiens	CEP120	centrosomal protein 120	GO:0010825 positive regulation of centrosome duplication;GO:1903724 positive regulation of centriole elongation;GO:0022027 interkinetic nuclear migration		Predicted intracellular proteins; Disease related genes	Microtubules (Approved); Additional: Cytosol				0	0	0	0	0	0	0	0	0	0	0	0	0	0	1	0	0	0	0	0	0
55754	TMEM30A	1	0	0	55754	Gene_ID	H. sapiens	55754	H. sapiens	TMEM30A	transmembrane protein 30A	GO:0061092 positive regulation of phospholipid translocation;GO:0061091 regulation of phospholipid translocation;GO:0006855 xenobiotic transmembrane transport		Transporters:Accessory Factors Involved in Transport; Predicted intracellular proteins					0	0	0	0	0	0	0	0	0	0	0	0	0	0	1	0	0	0	0	0	1
23259	DDHD2	0	0	1	23259	Gene_ID	H. sapiens	23259	H. sapiens	DDHD2	DDHD domain containing 2	GO:0090141 positive regulation of mitochondrial fission;GO:0034389 lipid droplet organization;GO:0019433 triglyceride catabolic process		Predicted intracellular proteins; Disease related genes	Cytosol (Supported); Additional: Centriolar satellite				0	0	0	0	0	0	0	0	0	0	0	0	0	0	0	0	0	0	0	0	0
51012	PRELID3B	0	0	1	51012	Gene_ID	H. sapiens	51012	H. sapiens	PRELID3B	PRELI domain containing 3B	GO:0120009 intermembrane lipid transfer;GO:0015914 phospholipid transport;GO:0015748 organophosphate ester transport		Predicted intracellular proteins	Nucleoplasm (Approved)			(M5953)HALLMARK KRAS SIGNALING UP	0	0	0	0	0	0	0	0	0	0	0	0	0	0	0	0	0	0	0	0	0
8331	H2AC14	0	0	1	8331	Gene_ID	H. sapiens	8331	H. sapiens	H2AC14	H2A clustered histone 14			Predicted intracellular proteins	Nucleoplasm (Approved)				1	0	0	0	1	1	0	0	0	0	0	0	0	0	0	0	0	0	0	0	0
6085	RNY3	0	0	1	6085	Gene_ID	H. sapiens	6085	H. sapiens	RNY3	RNA, Ro60-associated Y3								0	0	0	0	0	0	0	0	0	0	0	0	0	0	0	0	0	0	0	0	0
149420	PDIK1L	0	0	1	149420	Gene_ID	H. sapiens	149420	H. sapiens	PDIK1L	PDLIM1 interacting kinase 1 like	GO:0051321 meiotic cell cycle;GO:0022414 reproductive process;GO:0000003 reproduction	Other	Predicted intracellular proteins; Enzymes; Kinases; ENZYME proteins:Transferases	Nucleoplasm (Supported)				0	0	0	0	0	0	0	0	0	0	0	0	0	0	0	0	0	0	0	0	0
23152	CIC	0	0	1	23152	Gene_ID	H. sapiens	23152	H. sapiens	CIC	capicua transcriptional repressor	GO:0035176 social behavior;GO:0051703 biological process involved in intraspecies interaction between organisms;GO:0007613 memory		Cancer-related genes:Mutational cancer driver genes; Predicted intracellular proteins; Disease related genes; Transcription factors:Other all-alpha-helical DNA-binding domains	Nucleoplasm (Supported); Additional: Vesicles				0	0	0	0	0	0	0	0	0	0	0	0	0	0	0	0	0	0	0	0	0
6782	HSPA13	0	0	1	6782	Gene_ID	H. sapiens	6782	H. sapiens	HSPA13	heat shock protein family A (Hsp70) member 13	GO:0042026 protein refolding;GO:0051085 chaperone cofactor-dependent protein refolding;GO:0051084 'de novo' posttranslational protein folding		Predicted intracellular proteins		Copper		(M5941)HALLMARK UV RESPONSE UP	1	0	0	0	0	0	0	0	0	0	0	0	1	0	0	0	0	0	0	0	0
29079	MED4	0	0	1	29079	Gene_ID	H. sapiens	29079	H. sapiens	MED4	mediator complex subunit 4	GO:0060261 positive regulation of transcription initiation from RNA polymerase II promoter;GO:2000144 positive regulation of DNA-templated transcription, initiation;GO:0060260 regulation of transcription initiation from RNA polymerase II promoter		Predicted intracellular proteins	Nucleoplasm (Supported)				0	0	0	0	0	0	0	0	0	0	0	0	0	0	0	0	0	0	0	0	0
64149	C17orf75	0	0	1	64149	Gene_ID	H. sapiens	64149	H. sapiens	C17orf75	chromosome 17 open reading frame 75	GO:0099041 vesicle tethering to Golgi;GO:0099022 vesicle tethering;GO:0006903 vesicle targeting		Predicted intracellular proteins	Cytosol;Golgi apparatus (Approved)				0	0	0	0	0	0	0	0	0	0	0	0	0	0	0	0	0	0	0	0	0
28966	SNX24	0	0	1	28966	Gene_ID	H. sapiens	28966	H. sapiens	SNX24	sorting nexin 24	GO:0015031 protein transport;GO:0045184 establishment of protein localization;GO:0071705 nitrogen compound transport		Predicted intracellular proteins	Vesicles (Approved)			(M5906)HALLMARK ESTROGEN RESPONSE EARLY	0	0	0	0	0	0	0	0	0	0	0	0	0	0	0	0	0	0	0	0	0
113026	PLCD3	0	0	1	113026	Gene_ID	H. sapiens	113026	H. sapiens	PLCD3	phospholipase C delta 3	GO:0060716 labyrinthine layer blood vessel development;GO:0060674 placenta blood vessel development;GO:0060711 labyrinthine layer development		Predicted intracellular proteins; Enzymes; ENZYME proteins:Hydrolases	Plasma membrane (Approved)				0	0	0	0	0	0	0	0	0	0	0	0	0	1	0	0	0	0	0	0	0
10056	FARSB	0	0	1	10056	Gene_ID	H. sapiens	10056	H. sapiens	FARSB	phenylalanyl-tRNA synthetase subunit beta	GO:0006432 phenylalanyl-tRNA aminoacylation;GO:0051290 protein heterotetramerization;GO:0051291 protein heterooligomerization		Predicted intracellular proteins; ENZYME proteins:Ligase; Enzymes	Nucleoplasm (Supported); Additional: Cytosol	Phenylalanine			0	0	0	1	0	0	1	1	0	0	0	0	0	0	0	0	0	0	0	0	0
10190	TXNDC9	0	0	1	10190	Gene_ID	H. sapiens	10190	H. sapiens	TXNDC9	thioredoxin domain containing 9	GO:0006457 protein folding;GO:0000226 microtubule cytoskeleton organization;GO:0007017 microtubule-based process		Predicted intracellular proteins	Cytosol (Enhanced)				0	0	0	0	0	0	0	0	0	0	0	0	0	0	0	0	0	0	0	0	0
23244	PDS5A	0	0	1	23244	Gene_ID	H. sapiens	23244	H. sapiens	PDS5A	PDS5 cohesin associated factor A	GO:0007064 mitotic sister chromatid cohesion;GO:0008156 negative regulation of DNA replication;GO:0007062 sister chromatid cohesion		Predicted intracellular proteins	Nucleoplasm (Enhanced)				0	1	0	0	0	1	0	0	0	0	0	0	0	0	0	0	0	0	0	0	0
28973	MRPS18B	0	0	1	28973	Gene_ID	H. sapiens	28973	H. sapiens	MRPS18B	mitochondrial ribosomal protein S18B	GO:0032543 mitochondrial translation;GO:0140053 mitochondrial gene expression;GO:0006412 translation		Ribosomal proteins; Predicted intracellular proteins	Mitochondria (Supported); Additional: Cell Junctions			(M5926)HALLMARK MYC TARGETS V1	0	0	0	1	1	0	0	0	0	0	0	0	0	0	0	0	0	0	0	0	0
4088	SMAD3	0	0	1	4088	Gene_ID	H. sapiens	4088	H. sapiens	SMAD3	SMAD family member 3	GO:0061767 negative regulation of lung blood pressure;GO:0097296 activation of cysteine-type endopeptidase activity involved in apoptotic signaling pathway;GO:0032916 positive regulation of transforming growth factor beta3 production		Transcription factors:beta-Hairpin exposed by an alpha/beta-scaffold; Predicted intracellular proteins; Disease related genes; Cancer-related genes:Candidate cancer biomarkers	Nucleoplasm (Supported); Additional: Cytosol		(M228)PID SMAD2 3PATHWAY; (M286)PID TGFBR PATHWAY; (M254)PID MYC REPRESS PATHWAY	(M5896)HALLMARK TGF BETA SIGNALING; (M5942)HALLMARK UV RESPONSE DN; (M5890)HALLMARK TNFA SIGNALING VIA NFKB	0	0	0	0	1	0	0	1	1	0	0	0	0	1	1	0	0	1	0	0	0
27235	COQ2	0	0	1	27235	Gene_ID	H. sapiens	27235	H. sapiens	COQ2	coenzyme Q2, polyprenyltransferase	GO:0006744 ubiquinone biosynthetic process;GO:1901663 quinone biosynthetic process;GO:0006743 ubiquinone metabolic process		Potential drug targets; Disease related genes; Enzymes; ENZYME proteins:Transferases	Cytosol (Approved)				0	0	0	0	0	0	0	0	0	0	0	0	0	0	0	0	0	0	0	0	0
79734	KCTD17	0	0	1	79734	Gene_ID	H. sapiens	79734	H. sapiens	KCTD17	potassium channel tetramerization domain containing 17	GO:0045724 positive regulation of cilium assembly;GO:0032469 endoplasmic reticulum calcium ion homeostasis;GO:1902117 positive regulation of organelle assembly		Predicted intracellular proteins; Disease related genes					0	0	0	0	0	0	0	0	0	0	0	0	0	0	0	0	0	0	0	0	0
648	BMI1	0	0	1	648	Gene_ID	H. sapiens	648	H. sapiens	BMI1	BMI1 proto-oncogene, polycomb ring finger	GO:0009955 adaxial/abaxial pattern specification;GO:2000011 regulation of adaxial/abaxial pattern formation;GO:0033092 positive regulation of immature T cell proliferation in thymus		Predicted intracellular proteins; Cancer-related genes:Candidate cancer biomarkers	Nuclear bodies;Nucleoplasm (Approved); Additional: Cytosol;Nucleoli		(M66)PID MYC ACTIV PATHWAY		1	0	0	0	1	0	0	0	1	0	0	0	0	1	0	0	0	0	1	0	0
23421	ITGB3BP	0	0	1	23421	Gene_ID	H. sapiens	23421	H. sapiens	ITGB3BP	integrin subunit beta 3 binding protein	GO:0034080 CENP-A containing nucleosome assembly;GO:0061641 CENP-A containing chromatin organization;GO:0031055 chromatin remodeling at centromere		Predicted intracellular proteins	Nucleoplasm (Supported)				0	0	0	0	1	1	0	0	0	0	0	0	0	0	0	0	0	0	0	0	0
4673	NAP1L1	0	0	1	4673	Gene_ID	H. sapiens	4673	H. sapiens	NAP1L1	nucleosome assembly protein 1 like 1	GO:2000179 positive regulation of neural precursor cell proliferation;GO:2000177 regulation of neural precursor cell proliferation;GO:0006334 nucleosome assembly		Predicted intracellular proteins	Microtubules (Uncertain)			(M5925)HALLMARK E2F TARGETS; (M5926)HALLMARK MYC TARGETS V1	0	0	0	0	1	0	0	0	0	0	0	0	0	0	0	0	0	0	0	0	0
10336	PCGF3	0	0	1	10336	Gene_ID	H. sapiens	10336	H. sapiens	PCGF3	polycomb group ring finger 3	GO:0060819 inactivation of X chromosome by genetic imprinting;GO:0036353 histone H2A-K119 monoubiquitination;GO:0006349 regulation of gene expression by genetic imprinting		Predicted intracellular proteins	Nucleoplasm (Supported)				0	0	0	0	0	0	0	0	0	0	0	0	0	1	0	0	0	0	0	0	0
79651	RHBDF2	0	0	1	79651	Gene_ID	H. sapiens	79651	H. sapiens	RHBDF2	rhomboid 5 homolog 2	GO:0002862 negative regulation of inflammatory response to antigenic stimulus;GO:0002861 regulation of inflammatory response to antigenic stimulus;GO:0050709 negative regulation of protein secretion		Disease related genes; Peptidases:Serine-type peptidases; Predicted intracellular proteins; Potential drug targets; Enzymes				(M5939)HALLMARK P53 PATHWAY	0	0	0	0	0	0	0	0	0	0	0	0	0	1	1	0	0	0	0	0	0
26060	APPL1	0	0	1	26060	Gene_ID	H. sapiens	26060	H. sapiens	APPL1	adaptor protein, phosphotyrosine interacting with PH domain and leucine zipper 1	GO:1905450 negative regulation of Fc-gamma receptor signaling pathway involved in phagocytosis;GO:1905303 positive regulation of macropinocytosis;GO:1905301 regulation of macropinocytosis		Predicted intracellular proteins; Disease related genes	Centrosome;Mitotic spindle (Uncertain)		(M58)PID AR PATHWAY		0	0	0	0	0	0	0	0	1	1	0	0	0	1	1	0	0	1	0	0	0
828	CAPS	1	0	0	828	Gene_ID	H. sapiens	828	H. sapiens	CAPS	calcyphosine	GO:0035556 intracellular signal transduction;GO:0007165 signal transduction;GO:0023052 signaling		Predicted intracellular proteins	Plasma membrane (Approved); Additional: Cytosol;Nucleoplasm	Calcium citrate; Calcium Phosphate; Calcium phosphate dihydrate			0	0	0	0	0	0	0	0	0	0	0	0	0	0	0	0	0	0	0	0	1
5356	PLRG1	0	0	1	5356	Gene_ID	H. sapiens	5356	H. sapiens	PLRG1	pleiotropic regulator 1	GO:1900087 positive regulation of G1/S transition of mitotic cell cycle;GO:1902808 positive regulation of cell cycle G1/S phase transition;GO:1901992 positive regulation of mitotic cell cycle phase transition		Predicted intracellular proteins	Nuclear speckles (Enhanced); Additional: Nuclear membrane				0	0	0	0	0	0	0	0	0	0	0	1	0	0	0	0	0	0	0	0	0
100506844	GIHCG	0	0	1	100506844	Gene_ID	H. sapiens	100506844	H. sapiens	GIHCG	GIHCG inhibitor of miR-200b/200a/429 expression								0	0	0	0	0	0	0	0	0	0	0	0	0	0	0	0	0	0	0	0	0
284802	FRG1BP	0	0	1	284802	Gene_ID	H. sapiens	284802	H. sapiens	FRG1BP	FSHD region gene 1 family member B, pseudogene								0	0	0	0	0	0	0	0	0	0	0	0	0	0	0	0	0	0	0	0	0
3006	H1-2	0	0	1	3006	Gene_ID	H. sapiens	3006	H. sapiens	H1-2	H1.2 linker histone, cluster member	GO:0098532 histone H3-K27 trimethylation;GO:0016584 nucleosome positioning;GO:0080182 histone H3-K4 trimethylation		Predicted intracellular proteins	Nucleoli rim;Nucleoplasm (Supported)			(M5939)HALLMARK P53 PATHWAY	1	1	0	0	1	0	0	0	0	0	0	0	0	0	0	0	0	0	1	0	0
23350	U2SURP	0	0	1	23350	Gene_ID	H. sapiens	23350	H. sapiens	U2SURP	U2 snRNP associated SURP domain containing	GO:0006396 RNA processing;GO:0016070 RNA metabolic process;GO:0090304 nucleic acid metabolic process		Predicted intracellular proteins	Nucleoplasm (Supported)				0	0	0	0	0	0	0	0	0	0	0	1	0	0	0	0	0	0	0	0	0
80184	CEP290	0	0	1	80184	Gene_ID	H. sapiens	80184	H. sapiens	CEP290	centrosomal protein 290	GO:0097711 ciliary basal body-plasma membrane docking;GO:1905349 ciliary transition zone assembly;GO:0030916 otic vesicle formation		Predicted intracellular proteins; Disease related genes	Centrosome (Supported)				0	0	0	0	0	1	0	0	0	0	0	0	0	0	1	0	0	0	0	0	0
221710	SMIM13	0	0	1	221710	Gene_ID	H. sapiens	221710	H. sapiens	SMIM13	small integral membrane protein 13				Golgi apparatus;Nuclear membrane;Nucleoplasm (Approved)				0	0	0	0	0	0	0	0	0	0	0	0	0	0	0	0	0	0	0	0	0
6183	MRPS12	1	0	0	6183	Gene_ID	H. sapiens	6183	H. sapiens	MRPS12	mitochondrial ribosomal protein S12	GO:0032543 mitochondrial translation;GO:0140053 mitochondrial gene expression;GO:0006412 translation		Ribosomal proteins; Predicted intracellular proteins				(M5936)HALLMARK OXIDATIVE PHOSPHORYLATION	0	0	0	0	0	0	0	0	0	0	0	0	0	0	0	0	0	0	0	0	1
8525	DGKZ	0	0	1	8525	Gene_ID	H. sapiens	8525	H. sapiens	DGKZ	diacylglycerol kinase zeta	GO:0090216 positive regulation of 1-phosphatidylinositol-4-phosphate 5-kinase activity;GO:0090215 regulation of 1-phosphatidylinositol-4-phosphate 5-kinase activity;GO:0046834 lipid phosphorylation		Predicted intracellular proteins; Enzymes; ENZYME proteins:Transferases	Nuclear speckles (Supported)				0	0	0	0	0	0	0	0	0	0	0	0	0	1	0	0	0	0	0	0	0
196513	DCP1B	1	0	0	196513	Gene_ID	H. sapiens	196513	H. sapiens	DCP1B	decapping mRNA 1B	GO:0031087 deadenylation-independent decapping of nuclear-transcribed mRNA;GO:0031086 nuclear-transcribed mRNA catabolic process, deadenylation-independent decay;GO:0000290 deadenylation-dependent decapping of nuclear-transcribed mRNA		Predicted intracellular proteins	Cytosol;Vesicles (Supported)		(M19)PID P73PATHWAY		0	0	1	0	0	0	0	0	0	0	0	0	0	0	0	0	0	0	0	0	1
83448	PUS7L	0	0	1	83448	Gene_ID	H. sapiens	83448	H. sapiens	PUS7L	pseudouridine synthase 7 like	GO:0001522 pseudouridine synthesis;GO:0009451 RNA modification;GO:0043412 macromolecule modification		Predicted intracellular proteins	Nuclear speckles (Approved); Additional: Nucleoli				0	0	0	0	0	0	0	0	0	0	0	0	0	0	0	0	0	0	0	0	0
8764	TNFRSF14	0	0	1	8764	Gene_ID	H. sapiens	8764	H. sapiens	TNFRSF14	TNF receptor superfamily member 14	GO:1905675 negative regulation of adaptive immune memory response;GO:0090716 adaptive immune memory response;GO:1905674 regulation of adaptive immune memory response		Cancer-related genes:Mutated cancer genes; CD markers; Predicted intracellular proteins; Cancer-related genes:Candidate cancer biomarkers					0	0	0	0	0	0	0	0	0	0	0	0	0	0	0	0	0	1	0	0	0
134359	POC5	0	0	1	134359	Gene_ID	H. sapiens	134359	H. sapiens	POC5	POC5 centriolar protein	GO:0007049 cell cycle;GO:0009987 cellular process;GO:0008150 biological_process		Predicted intracellular proteins	Nucleoplasm (Enhanced)				0	0	0	0	0	0	0	0	0	0	0	0	0	0	0	0	0	0	0	0	0
3339	HSPG2	0	0	1	3339	Gene_ID	H. sapiens	3339	H. sapiens	HSPG2	heparan sulfate proteoglycan 2	GO:0016525 negative regulation of angiogenesis;GO:2000181 negative regulation of blood vessel morphogenesis;GO:1901343 negative regulation of vasculature development		Predicted intracellular proteins; Disease related genes; Predicted secreted proteins	Cytosol;Nucleoplasm;Plasma membrane (Approved)	Palifermin	(M5882)NABA PROTEOGLYCANS; (M5887)NABA BASEMENT MEMBRANES; (M5884)NABA CORE MATRISOME		0	0	0	0	0	0	0	0	0	1	0	0	0	1	0	0	0	0	0	0	0
25800	SLC39A6	1	0	0	25800	Gene_ID	H. sapiens	25800	H. sapiens	SLC39A6	solute carrier family 39 member 6	GO:0071578 zinc ion import across plasma membrane;GO:0071577 zinc ion transmembrane transport;GO:0006829 zinc ion transport		Transporters:Electrochemical Potential-driven transporters	Cytosol (Uncertain); Additional: Nucleoplasm;Plasma membrane			(M5906)HALLMARK ESTROGEN RESPONSE EARLY	0	0	0	0	0	0	0	0	0	0	0	0	0	0	0	0	0	0	0	0	1
83882	TSPAN10	0	1	0	83882	Gene_ID	H. sapiens	83882	H. sapiens	TSPAN10	tetraspanin 10	GO:0072594 establishment of protein localization to organelle;GO:0033365 protein localization to organelle;GO:0045184 establishment of protein localization							0	0	0	0	0	0	0	0	0	0	0	0	0	0	0	0	0	0	0	0	0
54700	RRN3	0	0	1	54700	Gene_ID	H. sapiens	54700	H. sapiens	RRN3	RRN3 homolog, RNA polymerase I transcription factor	GO:0001188 RNA polymerase I preinitiation complex assembly;GO:0006361 transcription initiation from RNA polymerase I promoter;GO:0070897 transcription preinitiation complex assembly		Predicted intracellular proteins	Nucleoli rim (Supported)		(M121)PID MTOR 4PATHWAY		0	0	0	0	1	0	0	0	0	0	0	0	0	1	0	0	0	0	0	0	0
89795	NAV3	0	1	0	89795	Gene_ID	H. sapiens	89795	H. sapiens	NAV3	neuron navigator 3	GO:0007026 negative regulation of microtubule depolymerization;GO:0032703 negative regulation of interleukin-2 production;GO:0031114 regulation of microtubule depolymerization		Cancer-related genes:Mutational cancer driver genes; Predicted intracellular proteins; Disease related genes	Nuclear membrane (Approved); Additional: Cytosol				0	0	0	0	0	0	0	0	0	0	0	0	0	0	0	0	0	0	0	0	0
7059	THBS3	1	0	0	7059	Gene_ID	H. sapiens	7059	H. sapiens	THBS3	thrombospondin 3	GO:0060346 bone trabecula formation;GO:0061430 bone trabecula morphogenesis;GO:0003417 growth plate cartilage development		Predicted intracellular proteins; Predicted secreted proteins	Vesicles (Approved)		(M3008)NABA ECM GLYCOPROTEINS; (M5884)NABA CORE MATRISOME; (M5889)NABA MATRISOME	(M5915)HALLMARK APICAL JUNCTION	0	0	0	0	0	0	0	0	0	0	0	0	0	0	0	0	0	1	0	0	1
2580	GAK	1	0	0	2580	Gene_ID	H. sapiens	2580	H. sapiens	GAK	cyclin G associated kinase	GO:1905224 clathrin-coated pit assembly;GO:0016191 synaptic vesicle uncoating;GO:0072318 clathrin coat disassembly	Other	Predicted intracellular proteins; Enzymes; Kinases; ENZYME proteins:Transferases	Golgi apparatus (Supported); Additional: Vesicles	Fostamatinib			0	0	0	0	0	0	0	0	0	1	0	0	0	0	0	0	0	0	0	0	1
54780	NSMCE4A	0	0	1	54780	Gene_ID	H. sapiens	54780	H. sapiens	NSMCE4A	NSE4 homolog A, SMC5-SMC6 complex component	GO:2001022 positive regulation of response to DNA damage stimulus;GO:2001020 regulation of response to DNA damage stimulus;GO:0006310 DNA recombination		Predicted intracellular proteins	Nucleoplasm (Enhanced)				0	1	0	0	0	0	0	0	0	0	0	0	0	0	0	0	0	0	0	0	0
51222	ZNF219	1	0	0	51222	Gene_ID	H. sapiens	51222	H. sapiens	ZNF219	zinc finger protein 219	GO:0060174 limb bud formation;GO:0032332 positive regulation of chondrocyte differentiation;GO:0061036 positive regulation of cartilage development		Transcription factors:Zinc-coordinating DNA-binding domains; Predicted intracellular proteins	Nucleoplasm (Supported)				0	0	0	0	0	0	0	0	0	0	0	0	0	0	0	0	0	1	0	0	1
4089	SMAD4	0	0	1	4089	Gene_ID	H. sapiens	4089	H. sapiens	SMAD4	SMAD family member 4	GO:0003251 positive regulation of cell proliferation involved in heart valve morphogenesis;GO:0061040 female gonad morphogenesis;GO:1905304 regulation of cardiac myofibril assembly		Disease related genes; Transcription factors:beta-Hairpin exposed by an alpha/beta-scaffold; Predicted intracellular proteins; Cancer-related genes:Mutational cancer driver genes; Cancer-related genes:Candidate cancer biomarkers; Cancer-related genes:Mutated cancer genes	Cytosol;Nucleoplasm (Supported); Additional: Centrosome		(M203)PID ALK2 PATHWAY; (M228)PID SMAD2 3PATHWAY; (M185)PID ALK1 PATHWAY		0	0	0	0	1	0	0	0	1	0	0	0	0	1	0	0	0	1	1	0	0
5818	NECTIN1	0	0	1	5818	Gene_ID	H. sapiens	5818	H. sapiens	NECTIN1	nectin cell adhesion molecule 1	GO:0019062 virion attachment to host cell;GO:0002934 desmosome organization;GO:0044650 adhesion of symbiont to host cell		CD markers; Disease related genes; Predicted secreted proteins			(M72)PID NECTIN PATHWAY	(M5915)HALLMARK APICAL JUNCTION	0	0	0	0	0	0	0	0	0	0	0	0	0	0	0	0	0	0	0	0	0
1312	COMT	0	0	1	1312	Gene_ID	H. sapiens	1312	H. sapiens	COMT	catechol-O-methyltransferase	GO:0031337 positive regulation of sulfur amino acid metabolic process;GO:0050668 positive regulation of homocysteine metabolic process;GO:0050666 regulation of homocysteine metabolic process		Disease related genes; ENZYME proteins:Transferases; Predicted intracellular proteins; FDA approved drug targets:Small molecule drugs; Enzymes	Vesicles (Enhanced); Additional: Endoplasmic reticulum	Ademetionine; Tolcapone; Entacapone; 3,5-Dinitrocatechol; 2-Methoxyestradiol; BIA; N-[(E)-3-[(2R,3S,4R,5R)-5-(6-Aminopurin-9-yl)-3,4-dihydroxyoxolan-2-yl]prop-2-enyl]-2,3-dihydroxy-5-nitrobenzamide; Nialamide; (3,4-DIHYDROXY-2-NITROPHENYL)(PHENYL)METHANONE; 7,8-dihydroxy-4-phenyl-2H-chromen-2-one; Opicapone		(M5934)HALLMARK XENOBIOTIC METABOLISM	0	0	0	0	0	0	1	0	0	0	0	0	0	0	0	0	0	0	1	1	0
55255	WDR41	0	0	1	55255	Gene_ID	H. sapiens	55255	H. sapiens	WDR41	WD repeat domain 41	GO:0010506 regulation of autophagy;GO:0006914 autophagy;GO:0061919 process utilizing autophagic mechanism		Predicted intracellular proteins	Nucleoplasm (Approved); Additional: Cytosol;Golgi apparatus				0	0	0	0	0	0	0	0	0	0	0	0	0	0	0	0	0	0	0	0	0
126282	TNFAIP8L1	0	0	1	126282	Gene_ID	H. sapiens	126282	H. sapiens	TNFAIP8L1	TNF alpha induced protein 8 like 1	GO:0032007 negative regulation of TOR signaling;GO:0032006 regulation of TOR signaling;GO:0031929 TOR signaling		Predicted intracellular proteins					0	0	0	0	0	0	0	0	0	0	0	0	0	0	0	0	0	0	0	1	0
55240	STEAP3	0	0	1	55240	Gene_ID	H. sapiens	55240	H. sapiens	STEAP3	STEAP3 metalloreductase	GO:0015677 copper ion import;GO:0033572 transferrin transport;GO:0006825 copper ion transport		Disease related genes	Cytosol (Approved); Additional: Nucleoli		(M145)PID P53 DOWNSTREAM PATHWAY	(M5939)HALLMARK P53 PATHWAY	0	0	0	0	0	1	0	0	0	0	0	0	0	0	0	0	0	0	0	0	0
220134	SKA1	0	0	1	220134	Gene_ID	H. sapiens	220134	H. sapiens	SKA1	spindle and kinetochore associated complex subunit 1	GO:0031110 regulation of microtubule polymerization or depolymerization;GO:0031109 microtubule polymerization or depolymerization;GO:0070507 regulation of microtubule cytoskeleton organization		Predicted intracellular proteins	Microtubules (Supported)				0	0	0	0	0	1	0	0	0	0	0	0	0	0	0	0	0	0	0	0	0
51124	IER3IP1	0	0	1	51124	Gene_ID	H. sapiens	51124	H. sapiens	IER3IP1	immediate early response 3 interacting protein 1	GO:0003331 positive regulation of extracellular matrix constituent secretion;GO:0003330 regulation of extracellular matrix constituent secretion;GO:0070278 extracellular matrix constituent secretion		Predicted intracellular proteins; Disease related genes	Endoplasmic reticulum (Supported)				0	0	0	0	0	0	0	0	0	0	0	0	0	0	1	0	0	0	0	0	0
64417	TMEM267	0	0	1	64417	Gene_ID	H. sapiens	64417	H. sapiens	TMEM267	transmembrane protein 267				Nucleoplasm (Approved); Additional: Vesicles				0	0	0	0	0	0	0	0	0	0	0	0	0	0	0	0	0	0	0	0	0
9703	KIAA0100	0	0	1	9703	Gene_ID	H. sapiens	9703	H. sapiens	KIAA0100	KIAA0100			Predicted intracellular proteins; Predicted secreted proteins	Cytosol;Nuclear speckles (Approved)				0	0	0	0	0	0	0	0	0	0	0	0	0	0	0	0	0	0	0	0	0
50999	TMED5	0	0	1	50999	Gene_ID	H. sapiens	50999	H. sapiens	TMED5	transmembrane p24 trafficking protein 5	GO:0090161 Golgi ribbon formation;GO:0006888 endoplasmic reticulum to Golgi vesicle-mediated transport;GO:0007030 Golgi organization		Predicted intracellular proteins					0	0	0	0	0	0	0	0	0	0	0	0	0	0	0	0	0	0	0	0	0
10635	RAD51AP1	1	0	0	10635	Gene_ID	H. sapiens	10635	H. sapiens	RAD51AP1	RAD51 associated protein 1	GO:0010520 regulation of reciprocal meiotic recombination;GO:0010845 positive regulation of reciprocal meiotic recombination;GO:1905168 positive regulation of double-strand break repair via homologous recombination		Predicted intracellular proteins	Nucleoplasm (Approved)			(M5925)HALLMARK E2F TARGETS	0	1	0	0	1	0	0	0	0	0	0	0	0	0	0	0	0	0	0	0	1
23514	SPIDR	0	1	0	23514	Gene_ID	H. sapiens	23514	H. sapiens	SPIDR	scaffold protein involved in DNA repair	GO:0072757 cellular response to camptothecin;GO:1901563 response to camptothecin;GO:0072711 cellular response to hydroxyurea		Predicted intracellular proteins	Nucleoplasm (Supported)				0	1	0	0	0	0	0	0	0	0	0	0	0	0	1	0	0	0	0	0	0
84272	YIPF4	0	0	1	84272	Gene_ID	H. sapiens	84272	H. sapiens	YIPF4	Yip1 domain family member 4	GO:0048280 vesicle fusion with Golgi apparatus;GO:0006906 vesicle fusion;GO:0090174 organelle membrane fusion		Predicted intracellular proteins	Golgi apparatus (Supported); Additional: Plasma membrane;Vesicles				0	0	0	0	0	0	0	0	0	0	0	0	0	0	0	0	0	0	0	0	0
147657	ZNF480	1	0	0	147657	Gene_ID	H. sapiens	147657	H. sapiens	ZNF480	zinc finger protein 480	GO:0006357 regulation of transcription by RNA polymerase II;GO:0006366 transcription by RNA polymerase II;GO:0006355 regulation of transcription, DNA-templated		Transcription factors:Zinc-coordinating DNA-binding domains; Predicted intracellular proteins	Nucleoplasm (Supported); Additional: Cytosol				0	0	0	0	0	0	0	0	0	0	0	0	0	0	0	0	0	0	0	0	1
6173	RPL36A	0	0	1	6173	Gene_ID	H. sapiens	6173	H. sapiens	RPL36A	ribosomal protein L36a	GO:0002181 cytoplasmic translation;GO:0006412 translation;GO:0043043 peptide biosynthetic process		Ribosomal proteins; Predicted intracellular proteins	Cytosol;Endoplasmic reticulum (Supported); Additional: Plasma membrane				1	0	0	1	0	0	0	0	0	0	0	1	0	0	0	0	0	0	0	0	0
112	ADCY6	0	0	1	112	Gene_ID	H. sapiens	112	H. sapiens	ADCY6	adenylate cyclase 6	GO:1904116 response to vasopressin;GO:1904117 cellular response to vasopressin;GO:0035811 negative regulation of urine volume		Disease related genes; ENZYME proteins:Lyases; Predicted intracellular proteins; Potential drug targets; Enzymes	Golgi apparatus (Approved)		(M56)PID LPA4 PATHWAY; (M8)PID ENDOTHELIN PATHWAY; (M15)PID LYSOPHOSPHOLIPID PATHWAY	(M5898)HALLMARK DNA REPAIR; (M5905)HALLMARK ADIPOGENESIS	0	0	0	0	0	0	0	0	0	0	0	0	0	1	0	0	0	0	0	0	0
8089	YEATS4	0	0	1	8089	Gene_ID	H. sapiens	8089	H. sapiens	YEATS4	YEATS domain containing 4	GO:0043968 histone H2A acetylation;GO:0043967 histone H4 acetylation;GO:0016573 histone acetylation		Predicted intracellular proteins	Nucleoplasm (Approved); Additional: Nuclear membrane		(M195)PID CMYB PATHWAY		0	0	0	0	0	0	0	0	0	0	0	0	0	0	0	1	0	0	0	0	0
10072	DPP3	1	0	0	10072	Gene_ID	H. sapiens	10072	H. sapiens	DPP3	dipeptidyl peptidase 3	GO:0006508 proteolysis;GO:0019538 protein metabolic process;GO:1901564 organonitrogen compound metabolic process		Predicted intracellular proteins; Peptidases:Metallopeptidases; Enzymes; ENZYME proteins:Hydrolases	Cytosol (Supported)				0	0	0	0	0	0	0	0	0	0	0	0	0	0	0	0	0	0	0	0	1
84233	TMEM126A	0	0	1	84233	Gene_ID	H. sapiens	84233	H. sapiens	TMEM126A	transmembrane protein 126A	GO:0021554 optic nerve development;GO:0021545 cranial nerve development;GO:0010257 NADH dehydrogenase complex assembly		Disease related genes	Cytosol (Approved); Additional: Nucleoplasm		(M254)PID MYC REPRESS PATHWAY		0	0	0	0	0	0	0	0	1	0	0	0	0	0	0	0	0	0	0	0	0
8894	EIF2S2	0	0	1	8894	Gene_ID	H. sapiens	8894	H. sapiens	EIF2S2	eukaryotic translation initiation factor 2 subunit beta	GO:0002176 male germ cell proliferation;GO:0036093 germ cell proliferation;GO:0001731 formation of translation preinitiation complex		Cancer-related genes:Mutated cancer genes; Predicted intracellular proteins	Endoplasmic reticulum (Supported); Additional: Nucleoli			(M5924)HALLMARK MTORC1 SIGNALING; (M5926)HALLMARK MYC TARGETS V1	1	0	0	1	0	0	0	1	0	0	0	0	1	1	0	0	0	0	0	0	0
54664	TMEM106B	0	0	1	54664	Gene_ID	H. sapiens	54664	H. sapiens	TMEM106B	transmembrane protein 106B	GO:1905671 regulation of lysosome organization;GO:0007042 lysosomal lumen acidification;GO:1905146 lysosomal protein catabolic process		Transporters; Potential drug targets; Disease related genes; Predicted intracellular proteins	Endosomes;Lysosomes (Supported)				0	0	0	0	0	0	0	0	0	0	0	0	0	0	0	0	0	0	0	0	0
63899	NSUN3	0	0	1	63899	Gene_ID	H. sapiens	63899	H. sapiens	NSUN3	NOP2/Sun RNA methyltransferase 3	GO:0002127 tRNA wobble base cytosine methylation;GO:0002101 tRNA wobble cytosine modification;GO:0002946 tRNA C5-cytosine methylation		Predicted intracellular proteins; Disease related genes					0	0	0	1	0	0	1	1	0	0	0	0	0	0	0	0	0	0	1	0	0
285636	C5orf51	0	0	1	285636	Gene_ID	H. sapiens	285636	H. sapiens	RIMOC1	RAB7A interacting MON1-CCZ1 complex subunit 1			Predicted intracellular proteins	Nucleoplasm (Enhanced); Additional: Cytosol				0	0	0	0	0	0	0	0	0	0	0	0	0	0	0	0	0	0	0	0	0
100506365	OTUD6B-AS1	0	0	1	100506365	Gene_ID	H. sapiens	100506365	H. sapiens	OTUD6B-AS1	OTUD6B antisense RNA 1 (head to head)								0	0	0	0	0	0	0	0	0	0	0	0	0	0	0	0	0	0	0	0	0
84619	ZGPAT	0	0	1	84619	Gene_ID	H. sapiens	84619	H. sapiens	ZGPAT	zinc finger CCCH-type and G-patch domain containing	GO:0007175 negative regulation of epidermal growth factor-activated receptor activity;GO:0042059 negative regulation of epidermal growth factor receptor signaling pathway;GO:0007176 regulation of epidermal growth factor-activated receptor activity		Transcription factors:Zinc-coordinating DNA-binding domains; Predicted intracellular proteins	Nucleoplasm;Plasma membrane (Supported)				0	0	0	0	0	0	0	0	0	0	0	0	0	0	0	0	0	0	0	0	0
54969	HPF1	0	0	1	54969	Gene_ID	H. sapiens	54969	H. sapiens	HPF1	histone PARylation factor 1	GO:0018312 peptidyl-serine ADP-ribosylation;GO:0010835 regulation of protein ADP-ribosylation;GO:0006471 protein ADP-ribosylation		Predicted intracellular proteins	Cytosol (Approved); Additional: Cytokinetic bridge;Microtubules				0	1	0	0	0	0	0	0	0	0	0	0	0	0	0	0	0	0	0	0	0
85301	COL27A1	0	0	1	85301	Gene_ID	H. sapiens	85301	H. sapiens	COL27A1	collagen type XXVII alpha 1 chain	GO:0003431 growth plate cartilage chondrocyte development;GO:0003433 chondrocyte development involved in endochondral bone morphogenesis;GO:0003418 growth plate cartilage chondrocyte differentiation		Predicted intracellular proteins; Disease related genes; Predicted secreted proteins			(M3005)NABA COLLAGENS; (M5884)NABA CORE MATRISOME; (M5889)NABA MATRISOME		0	0	0	0	0	0	0	0	0	0	0	0	0	1	0	0	0	1	0	0	0

## Sheet: Enrichment_All
GroupID	Category	Term	Description	LogP	Log(q-value)	InTerm_InList	Genes	Symbols
1_Summary	Reactome Gene Sets	R-HSA-2262752	Cellular responses to stress	-11.3443	-7.04393	39/757	648,1026,1054,1386,3006,3008,3017,3163,4189,5580,6144,6158,6173,6464,6782,7494,8331,8340,8347,8358,8894,8970,9997,10111,10383,11340,22926,23466,25842,26523,27230,27244,51501,79023,79726,84335,144577,200916,493869	BMI1,CDKN1A,CEBPG,ATF2,H1-2,H1-4,H2BC5,HMOX2,DNAJB9,PRKCD,RPL21,RPL28,RPL36A,SHC1,HSPA13,XBP1,H2AC14,H2BC13,H2BC4,H3C2,EIF2S2,H2BC11,SCO2,RAD50,TUBB4B,EXOSC8,ATF6,CBX6,ASF1A,AGO1,SERP1,SESN1,HIKESHI,NUP37,WDR59,AKT1S1,KICS2,RPL22L1,GPX8
1_Member	Reactome Gene Sets	R-HSA-2262752	Cellular responses to stress	-11.3443	-7.04393	39/757	648,1026,1054,1386,3006,3008,3017,3163,4189,5580,6144,6158,6173,6464,6782,7494,8331,8340,8347,8358,8894,8970,9997,10111,10383,11340,22926,23466,25842,26523,27230,27244,51501,79023,79726,84335,144577,200916,493869	BMI1,CDKN1A,CEBPG,ATF2,H1-2,H1-4,H2BC5,HMOX2,DNAJB9,PRKCD,RPL21,RPL28,RPL36A,SHC1,HSPA13,XBP1,H2AC14,H2BC13,H2BC4,H3C2,EIF2S2,H2BC11,SCO2,RAD50,TUBB4B,EXOSC8,ATF6,CBX6,ASF1A,AGO1,SERP1,SESN1,HIKESHI,NUP37,WDR59,AKT1S1,KICS2,RPL22L1,GPX8
1_Member	Reactome Gene Sets	R-HSA-8953897	Cellular responses to stimuli	-11.1038	-7.04393	39/771	648,1026,1054,1386,3006,3008,3017,3163,4189,5580,6144,6158,6173,6464,6782,7494,8331,8340,8347,8358,8894,8970,9997,10111,10383,11340,22926,23466,25842,26523,27230,27244,51501,79023,79726,84335,144577,200916,493869	BMI1,CDKN1A,CEBPG,ATF2,H1-2,H1-4,H2BC5,HMOX2,DNAJB9,PRKCD,RPL21,RPL28,RPL36A,SHC1,HSPA13,XBP1,H2AC14,H2BC13,H2BC4,H3C2,EIF2S2,H2BC11,SCO2,RAD50,TUBB4B,EXOSC8,ATF6,CBX6,ASF1A,AGO1,SERP1,SESN1,HIKESHI,NUP37,WDR59,AKT1S1,KICS2,RPL22L1,GPX8
2_Summary	GO Biological Processes	GO:0006974	cellular response to DNA damage stimulus	-8.91707	-5.0333	36/799	1026,1054,1386,2966,4331,5580,5983,6880,7341,7398,7508,7832,7913,8493,9126,9521,10111,10155,10600,10635,10714,11201,11335,23244,23376,23514,25842,28985,54780,54969,79968,84259,201973,221443,261726,728340,3006,3008,140609,3265,4035,4189,7494,22926,29761,87178	CDKN1A,CEBPG,ATF2,GTF2H2,MNAT1,PRKCD,RFC3,TAF9,SUMO1,USP1,XPC,BTG2,DEK,PPM1D,SMC3,EEF1E1,RAD50,TRIM28,USP16,RAD51AP1,POLD3,POLI,CBX3,PDS5A,UFL1,SPIDR,ASF1A,MCTS1,NSMCE4A,HPF1,WDR76,DCUN1D5,PRIMPOL,OARD1,TIPRL,GTF2H2C,H1-2,H1-4,NEK7,HRAS,LRP1,DNAJB9,XBP1,ATF6,USP25,PNPT1
2_Member	GO Biological Processes	GO:0006974	cellular response to DNA damage stimulus	-8.91707	-5.0333	36/799	1026,1054,1386,2966,4331,5580,5983,6880,7341,7398,7508,7832,7913,8493,9126,9521,10111,10155,10600,10635,10714,11201,11335,23244,23376,23514,25842,28985,54780,54969,79968,84259,201973,221443,261726,728340	CDKN1A,CEBPG,ATF2,GTF2H2,MNAT1,PRKCD,RFC3,TAF9,SUMO1,USP1,XPC,BTG2,DEK,PPM1D,SMC3,EEF1E1,RAD50,TRIM28,USP16,RAD51AP1,POLD3,POLI,CBX3,PDS5A,UFL1,SPIDR,ASF1A,MCTS1,NSMCE4A,HPF1,WDR76,DCUN1D5,PRIMPOL,OARD1,TIPRL,GTF2H2C
2_Member	GO Biological Processes	GO:0006281	DNA repair	-5.75768	-2.70259	23/520	1054,2966,4331,5983,7341,7398,7508,7832,7913,9126,10111,10155,10635,10714,11201,23244,23376,23514,25842,54780,54969,201973,728340	CEBPG,GTF2H2,MNAT1,RFC3,SUMO1,USP1,XPC,BTG2,DEK,SMC3,RAD50,TRIM28,RAD51AP1,POLD3,POLI,PDS5A,UFL1,SPIDR,ASF1A,NSMCE4A,HPF1,PRIMPOL,GTF2H2C
2_Member	GO Biological Processes	GO:2001020	regulation of response to DNA damage stimulus	-3.51295	-1.26599	11/219	1054,5580,6880,7398,7913,9521,10155,10635,23514,54780,79968	CEBPG,PRKCD,TAF9,USP1,DEK,EEF1E1,TRIM28,RAD51AP1,SPIDR,NSMCE4A,WDR76
2_Member	GO Biological Processes	GO:2001022	positive regulation of response to DNA damage stimulus	-3.13115	-1.01577	7/105	1054,5580,9521,10155,10635,23514,54780	CEBPG,PRKCD,EEF1E1,TRIM28,RAD51AP1,SPIDR,NSMCE4A
2_Member	GO Biological Processes	GO:0051052	regulation of DNA metabolic process	-2.69038	-0.767239	13/361	1026,1054,3006,3008,5580,5983,7398,7913,10111,10155,10635,23514,140609	CDKN1A,CEBPG,H1-2,H1-4,PRKCD,RFC3,USP1,DEK,RAD50,TRIM28,RAD51AP1,SPIDR,NEK7
2_Member	GO Biological Processes	GO:0080135	regulation of cellular response to stress	-2.51207	-0.653397	19/663	1054,3265,4035,4189,5580,6880,7398,7494,7913,9521,10155,10635,22926,23376,23514,29761,54780,79968,87178	CEBPG,HRAS,LRP1,DNAJB9,PRKCD,TAF9,USP1,XBP1,DEK,EEF1E1,TRIM28,RAD51AP1,ATF6,UFL1,SPIDR,USP25,NSMCE4A,WDR76,PNPT1
3_Summary	WikiPathways	WP4286	Genotoxicity pathway	-8.87323	-4.98946	7/63	59,8347,8493,9538,10346,51768,196513,27244	ACTA2,H2BC4,PPM1D,EI24,TRIM22,TM7SF3,DCP1B,SESN1
3_Member	WikiPathways	WP4286	Genotoxicity pathway	-8.87323	-4.98946	7/63	59,8347,8493,9538,10346,51768,196513	ACTA2,H2BC4,PPM1D,EI24,TRIM22,TM7SF3,DCP1B
3_Member	KEGG Pathway	ko04115	p53 signaling pathway	-2.84236	-0.964336	3/69	8493,9538,27244	PPM1D,EI24,SESN1
3_Member	KEGG Pathway	hsa04115	p53 signaling pathway	-2.67362	-0.869027	3/79	8493,9538,27244	PPM1D,EI24,SESN1
4_Summary	GO Biological Processes	GO:0043043	peptide biosynthetic process	-8.4649	-4.70607	30/761	1978,2058,2617,3646,4528,6144,6158,6173,6897,7832,8894,9521,10056,10573,10600,10605,11222,11340,26523,27230,28973,28985,51187,55278,63899,79731,83939,87178,132949,200916,20,5580,94101	EIF4EBP1,EPRS1,GARS1,EIF3E,MTIF2,RPL21,RPL28,RPL36A,TARS1,BTG2,EIF2S2,EEF1E1,FARSB,MRPL28,USP16,PAIP1,MRPL3,EXOSC8,AGO1,SERP1,MRPS18B,MCTS1,RSL24D1,QRSL1,NSUN3,NARS2,EIF2A,PNPT1,AASDH,RPL22L1,ABCA2,PRKCD,ORMDL1
4_Member	GO Biological Processes	GO:0043043	peptide biosynthetic process	-8.4649	-4.70607	30/761	1978,2058,2617,3646,4528,6144,6158,6173,6897,7832,8894,9521,10056,10573,10600,10605,11222,11340,26523,27230,28973,28985,51187,55278,63899,79731,83939,87178,132949,200916	EIF4EBP1,EPRS1,GARS1,EIF3E,MTIF2,RPL21,RPL28,RPL36A,TARS1,BTG2,EIF2S2,EEF1E1,FARSB,MRPL28,USP16,PAIP1,MRPL3,EXOSC8,AGO1,SERP1,MRPS18B,MCTS1,RSL24D1,QRSL1,NSUN3,NARS2,EIF2A,PNPT1,AASDH,RPL22L1
4_Member	GO Biological Processes	GO:0006412	translation	-8.19357	-4.53165	29/736	1978,2058,2617,3646,4528,6144,6158,6173,6897,7832,8894,9521,10056,10573,10600,10605,11222,11340,26523,27230,28973,28985,51187,55278,63899,79731,83939,87178,200916	EIF4EBP1,EPRS1,GARS1,EIF3E,MTIF2,RPL21,RPL28,RPL36A,TARS1,BTG2,EIF2S2,EEF1E1,FARSB,MRPL28,USP16,PAIP1,MRPL3,EXOSC8,AGO1,SERP1,MRPS18B,MCTS1,RSL24D1,QRSL1,NSUN3,NARS2,EIF2A,PNPT1,RPL22L1
4_Member	Reactome Gene Sets	R-HSA-72766	Translation	-7.3882	-3.8724	17/291	1978,2058,2617,3646,4528,6144,6158,6173,6897,8894,9521,10056,10573,11222,28973,79731,200916	EIF4EBP1,EPRS1,GARS1,EIF3E,MTIF2,RPL21,RPL28,RPL36A,TARS1,EIF2S2,EEF1E1,FARSB,MRPL28,MRPL3,MRPS18B,NARS2,RPL22L1
4_Member	GO Biological Processes	GO:0034248	regulation of cellular amide metabolic process	-3.40993	-1.35438	16/532	20,1978,2058,3646,4528,5580,7832,10600,10605,11340,26523,27230,63899,83939,87178,94101	ABCA2,EIF4EBP1,EPRS1,EIF3E,MTIF2,PRKCD,BTG2,USP16,PAIP1,EXOSC8,AGO1,SERP1,NSUN3,EIF2A,PNPT1,ORMDL1
4_Member	GO Biological Processes	GO:0006417	regulation of translation	-2.56426	-0.797755	13/469	1978,2058,3646,4528,7832,10600,10605,11340,26523,27230,63899,83939,87178	EIF4EBP1,EPRS1,EIF3E,MTIF2,BTG2,USP16,PAIP1,EXOSC8,AGO1,SERP1,NSUN3,EIF2A,PNPT1
5_Summary	Reactome Gene Sets	R-HSA-5693532	DNA Double-Strand Break Repair	-7.15762	-3.69981	8/167	3017,5983,8340,8347,8970,10635,10714,23030,1026,3006,3008,8331,10111,25842,301,2966,4331,4673,5119,8358,23421,55355,56652,7913,9739,9849,10155,10927,11335,23466,57169,64431,54700,648,26523,55166,64105,6880,9646,7508,1471,1386,2790,3265,4893,6464,9126,8379,23513,28973,728340,59,408,4088,4089,6478,10254,10600,29761,55288,51109,10383,79023,9021,51701,3140,11334	H2BC5,RFC3,H2BC13,H2BC4,H2BC11,RAD51AP1,POLD3,KDM4B,CDKN1A,H1-2,H1-4,H2AC14,RAD50,ASF1A,ANXA1,GTF2H2,MNAT1,NAP1L1,CHMP1A,H3C2,ITGB3BP,HJURP,TWNK,DEK,SETD1A,ZNF518A,TRIM28,SPIN1,CBX3,CBX6,ZNFX1,ACTR6,RRN3,BMI1,AGO1,CENPQ,CENPK,TAF9,CTR9,XPC,CST3,ATF2,GNG10,HRAS,NRAS,SHC1,SMC3,MAD1L1,SCRIB,MRPS18B,GTF2H2C,ACTA2,ARRB1,SMAD3,SMAD4,SIAH2,STAM2,USP16,USP25,RHOT1,RDH11,TUBB4B,NUP37,SOCS3,NLK,MR1,TUSC2
5_Member	Reactome Gene Sets	R-HSA-5693532	DNA Double-Strand Break Repair	-7.15762	-3.69981	8/167	3017,5983,8340,8347,8970,10635,10714,23030	H2BC5,RFC3,H2BC13,H2BC4,H2BC11,RAD51AP1,POLD3,KDM4B
5_Member	Reactome Gene Sets	R-HSA-2559586	DNA Damage/Telomere Stress Induced Senescence	-6.71328	-3.31514	10/80	1026,3006,3008,3017,8331,8340,8347,8970,10111,25842	CDKN1A,H1-2,H1-4,H2BC5,H2AC14,H2BC13,H2BC4,H2BC11,RAD50,ASF1A
5_Member	GO Biological Processes	GO:0071103	DNA conformation change	-6.69818	-3.31514	18/290	301,2966,3006,3008,3017,4331,4673,5119,5983,8340,8347,8358,8970,10111,23421,25842,55355,56652	ANXA1,GTF2H2,H1-2,H1-4,H2BC5,MNAT1,NAP1L1,CHMP1A,RFC3,H2BC13,H2BC4,H3C2,H2BC11,RAD50,ITGB3BP,ASF1A,HJURP,TWNK
5_Member	Reactome Gene Sets	R-HSA-5693567	HDR through Homologous Recombination (HRR) or Single Strand Annealing (SSA)	-6.6229	-3.21624	7/132	3017,5983,8340,8347,8970,10635,10714	H2BC5,RFC3,H2BC13,H2BC4,H2BC11,RAD51AP1,POLD3
5_Member	Reactome Gene Sets	R-HSA-5693538	Homology Directed Repair	-6.49144	-3.13055	7/138	3017,5983,8340,8347,8970,10635,10714	H2BC5,RFC3,H2BC13,H2BC4,H2BC11,RAD51AP1,POLD3
5_Member	Reactome Gene Sets	R-HSA-73886	Chromosome Maintenance	-6.428	-3.1085	7/141	3017,5983,8340,8347,8970,10714,55355	H2BC5,RFC3,H2BC13,H2BC4,H2BC11,POLD3,HJURP
5_Member	GO Biological Processes	GO:0006325	chromatin organization	-6.33176	-3.01226	21/409	3006,3008,3017,4673,7913,8340,8347,8358,8970,9739,9849,10155,10927,11335,23030,23421,23466,25842,55355,57169,64431	H1-2,H1-4,H2BC5,NAP1L1,DEK,H2BC13,H2BC4,H3C2,H2BC11,SETD1A,ZNF518A,TRIM28,SPIN1,CBX3,KDM4B,ITGB3BP,CBX6,ASF1A,HJURP,ZNFX1,ACTR6
5_Member	Reactome Gene Sets	R-HSA-73884	Base Excision Repair	-6.27452	-3.02757	6/92	3017,5983,8340,8347,8970,10714	H2BC5,RFC3,H2BC13,H2BC4,H2BC11,POLD3
5_Member	Reactome Gene Sets	R-HSA-73772	RNA Polymerase I Promoter Escape	-6.18174	-2.93172	10/91	2966,3017,4331,8331,8340,8347,8358,8970,11335,54700	GTF2H2,H2BC5,MNAT1,H2AC14,H2BC13,H2BC4,H3C2,H2BC11,CBX3,RRN3
5_Member	Reactome Gene Sets	R-HSA-2559583	Cellular Senescence	-6.03498	-2.86638	14/197	648,1026,3006,3008,3017,8331,8340,8347,8358,8970,10111,23466,25842,26523	BMI1,CDKN1A,H1-2,H1-4,H2BC5,H2AC14,H2BC13,H2BC4,H3C2,H2BC11,RAD50,CBX6,ASF1A,AGO1
5_Member	Reactome Gene Sets	R-HSA-606279	Deposition of new CENPA-containing nucleosomes at the centromere	-5.99683	-2.86638	9/74	3017,8331,8340,8347,8970,23421,55166,55355,64105	H2BC5,H2AC14,H2BC13,H2BC4,H2BC11,ITGB3BP,CENPQ,HJURP,CENPK
5_Member	Reactome Gene Sets	R-HSA-774815	Nucleosome assembly	-5.99683	-2.86638	9/74	3017,8331,8340,8347,8970,23421,55166,55355,64105	H2BC5,H2AC14,H2BC13,H2BC4,H2BC11,ITGB3BP,CENPQ,HJURP,CENPK
5_Member	GO Biological Processes	GO:0065004	protein-DNA complex assembly	-5.93073	-2.8251	14/201	3006,3008,3017,4673,6880,8340,8347,8358,8970,23421,25842,54700,55355,64105	H1-2,H1-4,H2BC5,NAP1L1,TAF9,H2BC13,H2BC4,H3C2,H2BC11,ITGB3BP,ASF1A,RRN3,HJURP,CENPK
5_Member	Reactome Gene Sets	R-HSA-8866654	E3 ubiquitin ligases ubiquitinate target proteins	-5.87447	-2.76905	5/59	3017,8340,8347,8970,9646	H2BC5,H2BC13,H2BC4,H2BC11,CTR9
5_Member	Reactome Gene Sets	R-HSA-73894	DNA Repair	-5.86307	-2.76905	9/335	3017,5983,7508,8340,8347,8970,10635,10714,23030	H2BC5,RFC3,XPC,H2BC13,H2BC4,H2BC11,RAD51AP1,POLD3,KDM4B
5_Member	Reactome Gene Sets	R-HSA-977225	Amyloid fiber formation	-5.79399	-2.73412	6/111	1471,3017,8340,8347,8358,8970	CST3,H2BC5,H2BC13,H2BC4,H3C2,H2BC11
5_Member	Reactome Gene Sets	R-HSA-157579	Telomere Maintenance	-5.74862	-2.71304	6/113	3017,5983,8340,8347,8970,10714	H2BC5,RFC3,H2BC13,H2BC4,H2BC11,POLD3
5_Member	Reactome Gene Sets	R-HSA-73728	RNA Polymerase I Promoter Opening	-5.73151	-2.71304	5/63	3017,8340,8347,8358,8970	H2BC5,H2BC13,H2BC4,H3C2,H2BC11
5_Member	GO Biological Processes	GO:0071824	protein-DNA complex subunit organization	-5.6972	-2.67873	15/241	3006,3008,3017,4673,6880,8340,8347,8358,8970,23421,25842,54700,55355,64105,64431	H1-2,H1-4,H2BC5,NAP1L1,TAF9,H2BC13,H2BC4,H3C2,H2BC11,ITGB3BP,ASF1A,RRN3,HJURP,CENPK,ACTR6
5_Member	Reactome Gene Sets	R-HSA-5334118	DNA methylation	-5.66362	-2.66445	5/65	3017,8340,8347,8358,8970	H2BC5,H2BC13,H2BC4,H3C2,H2BC11
5_Member	GO Biological Processes	GO:0006334	nucleosome assembly	-5.63072	-2.63156	11/129	3006,3008,3017,4673,8340,8347,8358,8970,23421,25842,55355	H1-2,H1-4,H2BC5,NAP1L1,H2BC13,H2BC4,H3C2,H2BC11,ITGB3BP,ASF1A,HJURP
5_Member	Reactome Gene Sets	R-HSA-5625886	Activated PKN1 stimulates transcription of AR (androgen receptor) regulated genes KLK2 and KLK3	-5.59792	-2.61724	5/67	3017,8340,8347,8358,8970	H2BC5,H2BC13,H2BC4,H3C2,H2BC11
5_Member	Reactome Gene Sets	R-HSA-427359	SIRT1 negatively regulates rRNA expression	-5.56586	-2.61357	5/68	3017,8340,8347,8358,8970	H2BC5,H2BC13,H2BC4,H3C2,H2BC11
5_Member	Reactome Gene Sets	R-HSA-69306	DNA Replication	-5.5595	-2.61357	7/190	3017,5983,8340,8347,8358,8970,10714	H2BC5,RFC3,H2BC13,H2BC4,H3C2,H2BC11,POLD3
5_Member	Reactome Gene Sets	R-HSA-68616	Assembly of the ORC complex at the origin of replication	-5.53429	-2.60475	5/69	3017,8340,8347,8358,8970	H2BC5,H2BC13,H2BC4,H3C2,H2BC11
5_Member	Reactome Gene Sets	R-HSA-73854	RNA Polymerase I Promoter Clearance	-5.42191	-2.49238	10/110	2966,3017,4331,8331,8340,8347,8358,8970,11335,54700	GTF2H2,H2BC5,MNAT1,H2AC14,H2BC13,H2BC4,H3C2,H2BC11,CBX3,RRN3
5_Member	Reactome Gene Sets	R-HSA-212300	PRC2 methylates histones and DNA	-5.41271	-2.54105	5/73	3017,8340,8347,8358,8970	H2BC5,H2BC13,H2BC4,H3C2,H2BC11
5_Member	Reactome Gene Sets	R-HSA-9710421	Defective pyroptosis	-5.41271	-2.54105	5/73	3017,8340,8347,8358,8970	H2BC5,H2BC13,H2BC4,H3C2,H2BC11
5_Member	Reactome Gene Sets	R-HSA-8939211	ESR-mediated signaling	-5.40067	-2.48693	14/223	1386,2790,3017,3265,4893,6464,8331,8340,8347,8358,8970,9126,23030,26523	ATF2,GNG10,H2BC5,HRAS,NRAS,SHC1,H2AC14,H2BC13,H2BC4,H3C2,H2BC11,SMC3,KDM4B,AGO1
5_Member	Reactome Gene Sets	R-HSA-2299718	Condensation of Prophase Chromosomes	-5.38343	-2.54105	5/74	3017,8340,8347,8358,8970	H2BC5,H2BC13,H2BC4,H3C2,H2BC11
5_Member	Reactome Gene Sets	R-HSA-73864	RNA Polymerase I Transcription	-5.35116	-2.45266	10/112	2966,3017,4331,8331,8340,8347,8358,8970,11335,54700	GTF2H2,H2BC5,MNAT1,H2AC14,H2BC13,H2BC4,H3C2,H2BC11,CBX3,RRN3
5_Member	Reactome Gene Sets	R-HSA-427389	ERCC6 (CSB) and EHMT2 (G9a) positively regulate rRNA expression	-5.32611	-2.49669	5/76	3017,8340,8347,8358,8970	H2BC5,H2BC13,H2BC4,H3C2,H2BC11
5_Member	GO Biological Processes	GO:0034728	nucleosome organization	-5.3074	-2.45165	12/167	3006,3008,3017,4673,8340,8347,8358,8970,23421,25842,55355,64431	H1-2,H1-4,H2BC5,NAP1L1,H2BC13,H2BC4,H3C2,H2BC11,ITGB3BP,ASF1A,HJURP,ACTR6
5_Member	Reactome Gene Sets	R-HSA-5693565	Recruitment and ATM-mediated phosphorylation of repair and signaling proteins at DNA double strand breaks	-5.29805	-2.48122	5/77	3017,8340,8347,8970,23030	H2BC5,H2BC13,H2BC4,H2BC11,KDM4B
5_Member	Reactome Gene Sets	R-HSA-5693606	DNA Double Strand Break Response	-5.27038	-2.47353	5/78	3017,8340,8347,8970,23030	H2BC5,H2BC13,H2BC4,H2BC11,KDM4B
5_Member	Reactome Gene Sets	R-HSA-8852135	Protein ubiquitination	-5.24308	-2.46197	5/79	3017,8340,8347,8970,9646	H2BC5,H2BC13,H2BC4,H2BC11,CTR9
5_Member	KEGG Pathway	ko05203	Viral carcinogenesis	-5.19704	-2.36762	13/201	1026,1386,2966,3017,3265,4893,8340,8347,8379,8970,23513,28973,728340	CDKN1A,ATF2,GTF2H2,H2BC5,HRAS,NRAS,H2BC13,H2BC4,MAD1L1,H2BC11,SCRIB,MRPS18B,GTF2H2C
5_Member	Reactome Gene Sets	R-HSA-912446	Meiotic recombination	-5.06177	-2.33434	5/86	3017,8340,8347,8358,8970	H2BC5,H2BC13,H2BC4,H3C2,H2BC11
5_Member	Reactome Gene Sets	R-HSA-9018519	Estrogen-dependent gene expression	-5.03727	-2.33198	6/150	3017,8340,8347,8358,8970,23030	H2BC5,H2BC13,H2BC4,H3C2,H2BC11,KDM4B
5_Member	GO Biological Processes	GO:0031497	chromatin assembly	-5.02078	-2.33198	6/151	3017,8340,8347,8358,8970,55355	H2BC5,H2BC13,H2BC4,H3C2,H2BC11,HJURP
5_Member	KEGG Pathway	hsa05203	Viral carcinogenesis	-4.96967	-2.17698	13/211	1026,1386,2966,3017,3265,4893,8340,8347,8379,8970,23513,28973,728340	CDKN1A,ATF2,GTF2H2,H2BC5,HRAS,NRAS,H2BC13,H2BC4,MAD1L1,H2BC11,SCRIB,MRPS18B,GTF2H2C
5_Member	Reactome Gene Sets	R-HSA-9616222	Transcriptional regulation of granulopoiesis	-4.96512	-2.30505	5/90	3017,8340,8347,8358,8970	H2BC5,H2BC13,H2BC4,H3C2,H2BC11
5_Member	Reactome Gene Sets	R-HSA-157118	Signaling by NOTCH	-4.94278	-2.30505	7/236	59,408,3017,8340,8347,8358,8970	ACTA2,ARRB1,H2BC5,H2BC13,H2BC4,H3C2,H2BC11
5_Member	Reactome Gene Sets	R-HSA-201722	Formation of the beta-catenin:TCF transactivating complex	-4.94167	-2.30505	5/91	3017,8340,8347,8358,8970	H2BC5,H2BC13,H2BC4,H3C2,H2BC11
5_Member	Reactome Gene Sets	R-HSA-5250924	B-WICH complex positively regulates rRNA expression	-4.94167	-2.30505	5/91	3017,8340,8347,8358,8970	H2BC5,H2BC13,H2BC4,H3C2,H2BC11
5_Member	Reactome Gene Sets	R-HSA-1912408	Pre-NOTCH Transcription and Translation	-4.8956	-2.27549	5/93	3017,8340,8347,8358,8970	H2BC5,H2BC13,H2BC4,H3C2,H2BC11
5_Member	Reactome Gene Sets	R-HSA-3214815	HDACs deacetylate histones	-4.87296	-2.27549	5/94	3017,8340,8347,8358,8970	H2BC5,H2BC13,H2BC4,H3C2,H2BC11
5_Member	Reactome Gene Sets	R-HSA-5625740	RHO GTPases activate PKNs	-4.85058	-2.27501	5/95	3017,8340,8347,8358,8970	H2BC5,H2BC13,H2BC4,H3C2,H2BC11
5_Member	Reactome Gene Sets	R-HSA-69473	G2/M DNA damage checkpoint	-4.85058	-2.27501	5/95	3017,5983,8340,8347,8970	H2BC5,RFC3,H2BC13,H2BC4,H2BC11
5_Member	Reactome Gene Sets	R-HSA-8936459	RUNX1 regulates genes involved in megakaryocyte differentiation and platelet function	-4.80656	-2.23806	5/97	3017,8340,8347,8358,8970	H2BC5,H2BC13,H2BC4,H3C2,H2BC11
5_Member	Reactome Gene Sets	R-HSA-5693607	Processing of DNA double-strand break ends	-4.78491	-2.2302	5/98	3017,5983,8340,8347,8970	H2BC5,RFC3,H2BC13,H2BC4,H2BC11
5_Member	Reactome Gene Sets	R-HSA-5689880	Ub-specific processing proteases	-4.77656	-1.99544	13/220	408,3017,4088,4089,6478,8331,8340,8347,8970,10254,10600,29761,55288	ARRB1,H2BC5,SMAD3,SMAD4,SIAH2,H2AC14,H2BC13,H2BC4,H2BC11,STAM2,USP16,USP25,RHOT1
5_Member	GO Biological Processes	GO:0006338	chromatin remodeling	-4.73907	-1.9701	14/255	3006,3008,3017,4673,8340,8347,8358,8970,11335,23030,23421,25842,55355,64431	H1-2,H1-4,H2BC5,NAP1L1,H2BC13,H2BC4,H3C2,H2BC11,CBX3,KDM4B,ITGB3BP,ASF1A,HJURP,ACTR6
5_Member	Reactome Gene Sets	R-HSA-9645723	Diseases of programmed cell death	-4.68013	-2.16158	5/103	3017,8340,8347,8358,8970	H2BC5,H2BC13,H2BC4,H3C2,H2BC11
5_Member	GO Biological Processes	GO:0006333	chromatin assembly or disassembly	-4.62936	-2.13402	6/177	3017,8340,8347,8358,8970,55355	H2BC5,H2BC13,H2BC4,H3C2,H2BC11,HJURP
5_Member	Reactome Gene Sets	R-HSA-171306	Packaging Of Telomere Ends	-4.6212	-2.13402	4/52	3017,8340,8347,8970	H2BC5,H2BC13,H2BC4,H2BC11
5_Member	Reactome Gene Sets	R-HSA-5250913	Positive epigenetic regulation of rRNA expression	-4.61985	-2.13402	5/106	3017,8340,8347,8358,8970	H2BC5,H2BC13,H2BC4,H3C2,H2BC11
5_Member	Reactome Gene Sets	R-HSA-5578749	Transcriptional regulation by small RNAs	-4.61985	-2.13402	5/106	3017,8340,8347,8358,8970	H2BC5,H2BC13,H2BC4,H3C2,H2BC11
5_Member	Reactome Gene Sets	R-HSA-427413	NoRC negatively regulates rRNA expression	-4.60016	-2.12008	5/107	3017,8340,8347,8358,8970	H2BC5,H2BC13,H2BC4,H3C2,H2BC11
5_Member	Reactome Gene Sets	R-HSA-9006931	Signaling by Nuclear Receptors	-4.57568	-1.87754	15/299	1386,2790,3017,3265,4893,6464,8331,8340,8347,8358,8970,9126,23030,26523,51109	ATF2,GNG10,H2BC5,HRAS,NRAS,SHC1,H2AC14,H2BC13,H2BC4,H3C2,H2BC11,SMC3,KDM4B,AGO1,RDH11
5_Member	Reactome Gene Sets	R-HSA-1912422	Pre-NOTCH Expression and Processing	-4.56138	-2.08697	5/109	3017,8340,8347,8358,8970	H2BC5,H2BC13,H2BC4,H3C2,H2BC11
5_Member	Reactome Gene Sets	R-HSA-5250941	Negative epigenetic regulation of rRNA expression	-4.54227	-2.08084	5/110	3017,8340,8347,8358,8970	H2BC5,H2BC13,H2BC4,H3C2,H2BC11
5_Member	GO Biological Processes	GO:0006323	DNA packaging	-4.54039	-1.87419	12/199	3006,3008,3017,4673,5119,8340,8347,8358,8970,23421,25842,55355	H1-2,H1-4,H2BC5,NAP1L1,CHMP1A,H2BC13,H2BC4,H3C2,H2BC11,ITGB3BP,ASF1A,HJURP
5_Member	Reactome Gene Sets	R-HSA-2559582	Senescence-Associated Secretory Phenotype (SASP)	-4.50462	-2.0615	5/112	3017,8340,8347,8358,8970	H2BC5,H2BC13,H2BC4,H3C2,H2BC11
5_Member	Reactome Gene Sets	R-HSA-110330	Recognition and association of DNA glycosylase with site containing an affected purine	-4.49298	-2.0615	4/56	3017,8340,8347,8970	H2BC5,H2BC13,H2BC4,H2BC11
5_Member	Reactome Gene Sets	R-HSA-110331	Cleavage of the damaged purine	-4.49298	-2.0615	4/56	3017,8340,8347,8970	H2BC5,H2BC13,H2BC4,H2BC11
5_Member	Reactome Gene Sets	R-HSA-73927	Depurination	-4.49298	-2.0615	4/56	3017,8340,8347,8970	H2BC5,H2BC13,H2BC4,H2BC11
5_Member	Reactome Gene Sets	R-HSA-9610379	HCMV Late Events	-4.43143	-2.00503	5/116	3017,8340,8347,8358,8970	H2BC5,H2BC13,H2BC4,H3C2,H2BC11
5_Member	Reactome Gene Sets	R-HSA-1500620	Meiosis	-4.39585	-1.97448	5/118	3017,8340,8347,8358,8970	H2BC5,H2BC13,H2BC4,H3C2,H2BC11
5_Member	Reactome Gene Sets	R-HSA-110328	Recognition and association of DNA glycosylase with site containing an affected pyrimidine	-4.34576	-1.95857	4/61	3017,8340,8347,8970	H2BC5,H2BC13,H2BC4,H2BC11
5_Member	Reactome Gene Sets	R-HSA-110329	Cleavage of the damaged pyrimidine	-4.34576	-1.95857	4/61	3017,8340,8347,8970	H2BC5,H2BC13,H2BC4,H2BC11
5_Member	Reactome Gene Sets	R-HSA-73928	Depyrimidination	-4.34576	-1.95857	4/61	3017,8340,8347,8970	H2BC5,H2BC13,H2BC4,H2BC11
5_Member	Reactome Gene Sets	R-HSA-5617472	Activation of anterior HOX genes in hindbrain development during early embryogenesis	-4.34369	-1.95857	5/121	3017,8340,8347,8358,8970	H2BC5,H2BC13,H2BC4,H3C2,H2BC11
5_Member	Reactome Gene Sets	R-HSA-5619507	Activation of HOX genes during differentiation	-4.34369	-1.95857	5/121	3017,8340,8347,8358,8970	H2BC5,H2BC13,H2BC4,H3C2,H2BC11
5_Member	Reactome Gene Sets	R-HSA-73929	Base-Excision Repair, AP Site Formation	-4.29044	-1.9284	4/63	3017,8340,8347,8970	H2BC5,H2BC13,H2BC4,H2BC11
5_Member	Reactome Gene Sets	R-HSA-2559580	Oxidative Stress Induced Senescence	-4.27627	-1.9284	5/125	3017,8340,8347,8358,8970	H2BC5,H2BC13,H2BC4,H3C2,H2BC11
5_Member	Reactome Gene Sets	R-HSA-212165	Epigenetic regulation of gene expression	-4.26646	-1.73687	10/149	2966,3017,4331,7913,8331,8340,8347,8358,8970,11335	GTF2H2,H2BC5,MNAT1,DEK,H2AC14,H2BC13,H2BC4,H3C2,H2BC11,CBX3
5_Member	KEGG Pathway	ko05034	Alcoholism	-4.26243	-1.73687	11/180	1386,2790,3017,3265,4893,6464,8331,8340,8347,8358,8970	ATF2,GNG10,H2BC5,HRAS,NRAS,SHC1,H2AC14,H2BC13,H2BC4,H3C2,H2BC11
5_Member	Reactome Gene Sets	R-HSA-68867	Assembly of the pre-replicative complex	-4.19522	-1.86775	5/130	3017,8340,8347,8358,8970	H2BC5,H2BC13,H2BC4,H3C2,H2BC11
5_Member	Reactome Gene Sets	R-HSA-8939236	RUNX1 regulates transcription of genes involved in differentiation of HSCs	-4.19522	-1.86775	5/130	3017,8340,8347,8358,8970	H2BC5,H2BC13,H2BC4,H3C2,H2BC11
5_Member	Reactome Gene Sets	R-HSA-9670095	Inhibition of DNA recombination at telomere	-4.15994	-1.84044	4/68	3017,8340,8347,8970	H2BC5,H2BC13,H2BC4,H2BC11
5_Member	KEGG Pathway	hsa05034	Alcoholism	-4.15502	-1.67719	11/185	1386,2790,3017,3265,4893,6464,8331,8340,8347,8358,8970	ATF2,GNG10,H2BC5,HRAS,NRAS,SHC1,H2AC14,H2BC13,H2BC4,H3C2,H2BC11
5_Member	KEGG Pathway	ko05322	Systemic lupus erythematosus	-4.1482	-1.83652	5/133	3017,8340,8347,8358,8970	H2BC5,H2BC13,H2BC4,H3C2,H2BC11
5_Member	Reactome Gene Sets	R-HSA-5693571	Nonhomologous End-Joining (NHEJ)	-4.13507	-1.83108	4/69	3017,8340,8347,8970	H2BC5,H2BC13,H2BC4,H2BC11
5_Member	Reactome Gene Sets	R-HSA-9609690	HCMV Early Events	-4.11748	-1.8233	5/135	3017,8340,8347,8358,8970	H2BC5,H2BC13,H2BC4,H3C2,H2BC11
5_Member	Reactome Gene Sets	R-HSA-211000	Gene Silencing by RNA	-4.07233	-1.79176	5/138	3017,8340,8347,8358,8970	H2BC5,H2BC13,H2BC4,H3C2,H2BC11
5_Member	Reactome Gene Sets	R-HSA-3214847	HATs acetylate histones	-4.01376	-1.7668	5/142	3017,8340,8347,8358,8970	H2BC5,H2BC13,H2BC4,H3C2,H2BC11
5_Member	Reactome Gene Sets	R-HSA-68875	Mitotic Prophase	-4.01376	-1.7668	5/142	3017,8340,8347,8358,8970	H2BC5,H2BC13,H2BC4,H3C2,H2BC11
5_Member	Reactome Gene Sets	R-HSA-9609646	HCMV Infection	-4.0072	-1.58583	10/160	3017,5119,8331,8340,8347,8358,8970,10155,10383,79023	H2BC5,CHMP1A,H2AC14,H2BC13,H2BC4,H3C2,H2BC11,TRIM28,TUBB4B,NUP37
5_Member	Reactome Gene Sets	R-HSA-1474165	Reproduction	-3.9994	-1.76235	5/143	3017,8340,8347,8358,8970	H2BC5,H2BC13,H2BC4,H3C2,H2BC11
5_Member	KEGG Pathway	hsa05322	Systemic lupus erythematosus	-3.95696	-1.73054	5/146	3017,8340,8347,8358,8970	H2BC5,H2BC13,H2BC4,H3C2,H2BC11
5_Member	Reactome Gene Sets	R-HSA-69002	DNA Replication Pre-Initiation	-3.94303	-1.73054	5/147	3017,8340,8347,8358,8970	H2BC5,H2BC13,H2BC4,H3C2,H2BC11
5_Member	Reactome Gene Sets	R-HSA-8878171	Transcriptional regulation by RUNX1	-3.90624	-1.70313	6/239	3017,8340,8347,8358,8970,9021	H2BC5,H2BC13,H2BC4,H3C2,H2BC11,SOCS3
5_Member	Reactome Gene Sets	R-HSA-1221632	Meiotic synapsis	-3.90566	-1.70313	4/79	3017,8340,8347,8970	H2BC5,H2BC13,H2BC4,H2BC11
5_Member	Reactome Gene Sets	R-HSA-69481	G2/M Checkpoints	-3.68431	-1.53561	5/167	3017,5983,8340,8347,8970	H2BC5,RFC3,H2BC13,H2BC4,H2BC11
5_Member	Reactome Gene Sets	R-HSA-3247509	Chromatin modifying enzymes	-3.58557	-1.4602	6/274	3017,8340,8347,8358,8970,23030	H2BC5,H2BC13,H2BC4,H3C2,H2BC11,KDM4B
5_Member	Reactome Gene Sets	R-HSA-4839726	Chromatin organization	-3.58557	-1.4602	6/274	3017,8340,8347,8358,8970,23030	H2BC5,H2BC13,H2BC4,H3C2,H2BC11,KDM4B
5_Member	Reactome Gene Sets	R-HSA-5688426	Deubiquitination	-3.44965	-1.22817	13/298	408,3017,4088,4089,6478,8331,8340,8347,8970,10254,10600,29761,55288	ARRB1,H2BC5,SMAD3,SMAD4,SIAH2,H2AC14,H2BC13,H2BC4,H2BC11,STAM2,USP16,USP25,RHOT1
5_Member	Reactome Gene Sets	R-HSA-195721	Signaling by WNT	-3.14552	-1.17732	6/332	3017,8340,8347,8358,8970,51701	H2BC5,H2BC13,H2BC4,H3C2,H2BC11,NLK
5_Member	Reactome Gene Sets	R-HSA-201681	TCF dependent signaling in response to WNT	-3.02571	-1.09111	5/233	3017,8340,8347,8358,8970	H2BC5,H2BC13,H2BC4,H3C2,H2BC11
5_Member	GO Biological Processes	GO:0050829	defense response to Gram-negative bacterium	-2.49919	-0.751079	3/91	3140,8970,11334	MR1,H2BC11,TUSC2
5_Member	GO Biological Processes	GO:0050830	defense response to Gram-positive bacterium	-2.33641	-0.634754	3/104	3140,8347,8970	MR1,H2BC4,H2BC11
6_Summary	Reactome Gene Sets	R-HSA-69278	Cell Cycle, Mitotic	-6.83737	-3.32157	26/560	1026,3017,4331,5000,5983,7341,8331,8340,8347,8358,8379,8548,8970,9126,9493,10383,10714,10733,23244,23421,55166,64105,79023,80184,140609,220134,10111,55355,3163,3799,3895,3985,4650,5580,7410,10254,11188,23513,25963,55240,55288,89941,116985	CDKN1A,H2BC5,MNAT1,ORC4,RFC3,SUMO1,H2AC14,H2BC13,H2BC4,H3C2,MAD1L1,BLZF1,H2BC11,SMC3,KIF23,TUBB4B,POLD3,PLK4,PDS5A,ITGB3BP,CENPQ,CENPK,NUP37,CEP290,NEK7,SKA1,RAD50,HJURP,HMOX2,KIF5B,KTN1,LIMK2,MYO9B,PRKCD,VAV2,STAM2,NISCH,SCRIB,TMEM87A,STEAP3,RHOT1,RHOT2,ARAP1
6_Member	Reactome Gene Sets	R-HSA-69278	Cell Cycle, Mitotic	-6.83737	-3.32157	26/560	1026,3017,4331,5000,5983,7341,8331,8340,8347,8358,8379,8548,8970,9126,9493,10383,10714,10733,23244,23421,55166,64105,79023,80184,140609,220134	CDKN1A,H2BC5,MNAT1,ORC4,RFC3,SUMO1,H2AC14,H2BC13,H2BC4,H3C2,MAD1L1,BLZF1,H2BC11,SMC3,KIF23,TUBB4B,POLD3,PLK4,PDS5A,ITGB3BP,CENPQ,CENPK,NUP37,CEP290,NEK7,SKA1
6_Member	Reactome Gene Sets	R-HSA-68886	M Phase	-6.17867	-2.93172	21/418	3017,7341,8331,8340,8347,8358,8379,8548,8970,9126,9493,10383,10733,23244,23421,55166,64105,79023,80184,140609,220134	H2BC5,SUMO1,H2AC14,H2BC13,H2BC4,H3C2,MAD1L1,BLZF1,H2BC11,SMC3,KIF23,TUBB4B,PLK4,PDS5A,ITGB3BP,CENPQ,CENPK,NUP37,CEP290,NEK7,SKA1
6_Member	Reactome Gene Sets	R-HSA-1640170	Cell Cycle	-6.12297	-2.9082	28/691	1026,3017,4331,5000,5983,7341,8331,8340,8347,8358,8379,8548,8970,9126,9493,10111,10383,10714,10733,23244,23421,55166,55355,64105,79023,80184,140609,220134	CDKN1A,H2BC5,MNAT1,ORC4,RFC3,SUMO1,H2AC14,H2BC13,H2BC4,H3C2,MAD1L1,BLZF1,H2BC11,SMC3,KIF23,RAD50,TUBB4B,POLD3,PLK4,PDS5A,ITGB3BP,CENPQ,HJURP,CENPK,NUP37,CEP290,NEK7,SKA1
6_Member	Reactome Gene Sets	R-HSA-9716542	Signaling by Rho GTPases, Miro GTPases and RHOBTB3	-5.74127	-2.70259	28/723	3017,3163,3799,3895,3985,4650,5580,7410,8331,8340,8347,8358,8379,8970,10254,10383,11188,23421,23513,25963,55166,55240,55288,64105,79023,89941,116985,220134	H2BC5,HMOX2,KIF5B,KTN1,LIMK2,MYO9B,PRKCD,VAV2,H2AC14,H2BC13,H2BC4,H3C2,MAD1L1,H2BC11,STAM2,TUBB4B,NISCH,ITGB3BP,SCRIB,TMEM87A,CENPQ,STEAP3,RHOT1,CENPK,NUP37,RHOT2,ARAP1,SKA1
6_Member	Reactome Gene Sets	R-HSA-195258	RHO GTPase Effectors	-5.31061	-2.45165	17/327	3017,3799,3895,3985,5580,8331,8340,8347,8358,8379,8970,10383,23421,55166,64105,79023,220134	H2BC5,KIF5B,KTN1,LIMK2,PRKCD,H2AC14,H2BC13,H2BC4,H3C2,MAD1L1,H2BC11,TUBB4B,ITGB3BP,CENPQ,CENPK,NUP37,SKA1
6_Member	Reactome Gene Sets	R-HSA-194315	Signaling by Rho GTPases	-4.97617	-2.17698	26/707	3017,3163,3799,3895,3985,4650,5580,7410,8331,8340,8347,8358,8379,8970,10254,10383,11188,23421,23513,25963,55166,55240,64105,79023,116985,220134	H2BC5,HMOX2,KIF5B,KTN1,LIMK2,MYO9B,PRKCD,VAV2,H2AC14,H2BC13,H2BC4,H3C2,MAD1L1,H2BC11,STAM2,TUBB4B,NISCH,ITGB3BP,SCRIB,TMEM87A,CENPQ,STEAP3,CENPK,NUP37,ARAP1,SKA1
6_Member	Reactome Gene Sets	R-HSA-69620	Cell Cycle Checkpoints	-4.67775	-1.94011	15/293	1026,3017,5000,5983,7341,8340,8347,8379,8970,10111,23421,55166,64105,79023,220134	CDKN1A,H2BC5,ORC4,RFC3,SUMO1,H2BC13,H2BC4,MAD1L1,H2BC11,RAD50,ITGB3BP,CENPQ,CENPK,NUP37,SKA1
6_Member	Reactome Gene Sets	R-HSA-68877	Mitotic Prometaphase	-4.43478	-1.81424	12/204	8379,9126,10383,10733,23244,23421,55166,64105,79023,80184,140609,220134	MAD1L1,SMC3,TUBB4B,PLK4,PDS5A,ITGB3BP,CENPQ,CENPK,NUP37,CEP290,NEK7,SKA1
6_Member	Reactome Gene Sets	R-HSA-2500257	Resolution of Sister Chromatid Cohesion	-4.10363	-1.65172	9/126	8379,9126,10383,23244,23421,55166,64105,79023,220134	MAD1L1,SMC3,TUBB4B,PDS5A,ITGB3BP,CENPQ,CENPK,NUP37,SKA1
6_Member	CORUM	CORUM:7394	CENP-H-I complex	-3.66282	-1.52203	3/11	23421,55166,64105	ITGB3BP,CENPQ,CENPK
6_Member	Reactome Gene Sets	R-HSA-9648025	EML4 and NUDC in mitotic spindle formation	-3.57831	-1.32122	8/117	8379,10383,23421,55166,64105,79023,140609,220134	MAD1L1,TUBB4B,ITGB3BP,CENPQ,CENPK,NUP37,NEK7,SKA1
6_Member	CORUM	CORUM:1179	CENP-A NAC-CAD complex	-3.54151	-1.42924	3/12	23421,55166,64105	ITGB3BP,CENPQ,CENPK
6_Member	Reactome Gene Sets	R-HSA-68882	Mitotic Anaphase	-2.82555	-0.954485	9/236	7341,9126,10383,23244,23421,55166,64105,79023,220134	SUMO1,SMC3,TUBB4B,PDS5A,ITGB3BP,CENPQ,CENPK,NUP37,SKA1
6_Member	Reactome Gene Sets	R-HSA-2467813	Separation of Sister Chromatids	-2.82236	-0.95283	8/191	9126,10383,23244,23421,55166,64105,79023,220134	SMC3,TUBB4B,PDS5A,ITGB3BP,CENPQ,CENPK,NUP37,SKA1
6_Member	Reactome Gene Sets	R-HSA-2555396	Mitotic Metaphase and Anaphase	-2.81295	-0.944815	9/237	7341,9126,10383,23244,23421,55166,64105,79023,220134	SUMO1,SMC3,TUBB4B,PDS5A,ITGB3BP,CENPQ,CENPK,NUP37,SKA1
6_Member	Reactome Gene Sets	R-HSA-141424	Amplification of signal from the kinetochores	-2.61332	-0.720775	6/96	8379,23421,55166,64105,79023,220134	MAD1L1,ITGB3BP,CENPQ,CENPK,NUP37,SKA1
6_Member	Reactome Gene Sets	R-HSA-141444	Amplification of signal from unattached kinetochores via a MAD2 inhibitory signal	-2.61332	-0.720775	6/96	8379,23421,55166,64105,79023,220134	MAD1L1,ITGB3BP,CENPQ,CENPK,NUP37,SKA1
6_Member	Reactome Gene Sets	R-HSA-5663220	RHO GTPases Activate Formins	-2.41577	-0.587632	7/140	8379,10383,23421,55166,64105,79023,220134	MAD1L1,TUBB4B,ITGB3BP,CENPQ,CENPK,NUP37,SKA1
6_Member	Reactome Gene Sets	R-HSA-69618	Mitotic Spindle Checkpoint	-2.26432	-0.492627	6/113	8379,23421,55166,64105,79023,220134	MAD1L1,ITGB3BP,CENPQ,CENPK,NUP37,SKA1
7_Summary	GO Biological Processes	GO:0043038	amino acid activation	-6.17319	-2.95842	7/45	2058,2617,6897,10056,55278,79731,132949,9521,10978,11340,54482,63899,285605,1312,4594,51074	EPRS1,GARS1,TARS1,FARSB,QRSL1,NARS2,AASDH,EEF1E1,CLP1,EXOSC8,TRMT13,NSUN3,DTWD2,COMT,MMUT,APIP
7_Member	GO Biological Processes	GO:0043038	amino acid activation	-6.17319	-2.95842	7/45	2058,2617,6897,10056,55278,79731,132949	EPRS1,GARS1,TARS1,FARSB,QRSL1,NARS2,AASDH
7_Member	Reactome Gene Sets	R-HSA-379716	Cytosolic tRNA aminoacylation	-5.20629	-2.43645	5/24	2058,2617,6897,9521,10056	EPRS1,GARS1,TARS1,EEF1E1,FARSB
7_Member	GO Biological Processes	GO:0006399	tRNA metabolic process	-5.19524	-2.4364	11/179	2058,2617,6897,10056,10978,11340,54482,55278,63899,79731,285605	EPRS1,GARS1,TARS1,FARSB,CLP1,EXOSC8,TRMT13,QRSL1,NSUN3,NARS2,DTWD2
7_Member	Reactome Gene Sets	R-HSA-379724	tRNA Aminoacylation	-5.14231	-2.40466	6/42	2058,2617,6897,9521,10056,79731	EPRS1,GARS1,TARS1,EEF1E1,FARSB,NARS2
7_Member	GO Biological Processes	GO:0043039	tRNA aminoacylation	-5.02158	-2.33198	6/44	2058,2617,6897,10056,55278,79731	EPRS1,GARS1,TARS1,FARSB,QRSL1,NARS2
7_Member	GO Biological Processes	GO:0006418	tRNA aminoacylation for protein translation	-4.02803	-1.77094	5/41	2058,2617,6897,10056,79731	EPRS1,GARS1,TARS1,FARSB,NARS2
7_Member	KEGG Pathway	ko00970	Aminoacyl-tRNA biosynthesis	-4.00206	-1.76235	6/66	2058,2617,6897,10056,55278,79731	EPRS1,GARS1,TARS1,FARSB,QRSL1,NARS2
7_Member	KEGG Pathway	hsa00970	Aminoacyl-tRNA biosynthesis	-3.82485	-1.64865	6/71	2058,2617,6897,10056,55278,79731	EPRS1,GARS1,TARS1,FARSB,QRSL1,NARS2
7_Member	GO Biological Processes	GO:0006520	cellular amino acid metabolic process	-2.80952	-0.943302	10/285	1312,2058,2617,4594,6897,10056,51074,55278,79731,132949	COMT,EPRS1,GARS1,MMUT,TARS1,FARSB,APIP,QRSL1,NARS2,AASDH
8_Summary	GO Biological Processes	GO:0034660	ncRNA metabolic process	-6.0924	-2.90759	20/487	2058,2617,3265,4088,6897,10056,10438,10978,11340,26523,54482,55278,55596,55759,63899,65095,79731,87178,196074,285605,3646,6880,8894,26829,28985,51001,51187,55003,83939	EPRS1,GARS1,HRAS,SMAD3,TARS1,FARSB,C1D,CLP1,EXOSC8,AGO1,TRMT13,QRSL1,ZCCHC8,WDR12,NSUN3,KRI1,NARS2,PNPT1,METTL15,DTWD2,EIF3E,TAF9,EIF2S2,RNU5E-1,MCTS1,MTERF3,RSL24D1,PAK1IP1,EIF2A
8_Member	GO Biological Processes	GO:0034660	ncRNA metabolic process	-6.0924	-2.90759	20/487	2058,2617,3265,4088,6897,10056,10438,10978,11340,26523,54482,55278,55596,55759,63899,65095,79731,87178,196074,285605	EPRS1,GARS1,HRAS,SMAD3,TARS1,FARSB,C1D,CLP1,EXOSC8,AGO1,TRMT13,QRSL1,ZCCHC8,WDR12,NSUN3,KRI1,NARS2,PNPT1,METTL15,DTWD2
8_Member	GO Biological Processes	GO:0022613	ribonucleoprotein complex biogenesis	-4.63732	-2.13402	17/463	3646,6880,8894,10438,10978,11340,26523,26829,28985,51001,51187,55003,55759,63899,65095,83939,196074	EIF3E,TAF9,EIF2S2,C1D,CLP1,EXOSC8,AGO1,RNU5E-1,MCTS1,MTERF3,RSL24D1,PAK1IP1,WDR12,NSUN3,KRI1,EIF2A,METTL15
8_Member	GO Biological Processes	GO:0000460	maturation of 5.8S rRNA	-3.20471	-1.21303	4/35	10438,11340,55759,65095	C1D,EXOSC8,WDR12,KRI1
8_Member	GO Biological Processes	GO:0034470	ncRNA processing	-2.72918	-0.899764	12/395	4088,10438,10978,11340,26523,54482,55596,55759,63899,65095,196074,285605	SMAD3,C1D,CLP1,EXOSC8,AGO1,TRMT13,ZCCHC8,WDR12,NSUN3,KRI1,METTL15,DTWD2
8_Member	GO Biological Processes	GO:0042254	ribosome biogenesis	-2.65733	-0.858729	10/299	10438,11340,51001,51187,55003,55759,63899,65095,83939,196074	C1D,EXOSC8,MTERF3,RSL24D1,PAK1IP1,WDR12,NSUN3,KRI1,EIF2A,METTL15
8_Member	GO Biological Processes	GO:0000466	maturation of 5.8S rRNA from tricistronic rRNA transcript (SSU-rRNA, 5.8S rRNA, LSU-rRNA)	-2.62112	-0.835375	3/24	11340,55759,65095	EXOSC8,WDR12,KRI1
9_Summary	CORUM	CORUM:3740	SKI-SMAD3-SMAD4 complex	-5.85119	-2.76905	3/3	4088,4089,6497,1026,3265,4893,5900,26060,1386,6670,3985,6464,7341,2966,84233,6478,9646,10153,27244,51701,85363,892,5534,648,6880,92140,7410,83939,5580,59	SMAD3,SMAD4,SKI,CDKN1A,HRAS,NRAS,RALGDS,APPL1,ATF2,SP3,LIMK2,SHC1,SUMO1,GTF2H2,TMEM126A,SIAH2,CTR9,CEBPZ,SESN1,NLK,TRIM5,CCNC,PPP3R1,BMI1,TAF9,MTDH,VAV2,EIF2A,PRKCD,ACTA2
9_Member	CORUM	CORUM:3740	SKI-SMAD3-SMAD4 complex	-5.85119	-2.76905	3/3	4088,4089,6497	SMAD3,SMAD4,SKI
9_Member	CORUM	CORUM:3959	SKI-SMAD3-SMAD4 complex, TGF(beta)-dependent	-5.85119	-2.76905	3/3	4088,4089,6497	SMAD3,SMAD4,SKI
9_Member	Reactome Gene Sets	R-HSA-8941855	RUNX3 regulates CDKN1A transcription	-4.32169	-1.95065	3/7	1026,4088,4089	CDKN1A,SMAD3,SMAD4
9_Member	KEGG Pathway	hsa05210	Colorectal cancer	-4.02427	-1.77058	7/94	1026,3265,4088,4089,4893,5900,26060	CDKN1A,HRAS,SMAD3,SMAD4,NRAS,RALGDS,APPL1
9_Member	GO Biological Processes	GO:0032906	transforming growth factor beta2 production	-3.94876	-1.73054	3/9	1386,4088,4089	ATF2,SMAD3,SMAD4
9_Member	GO Biological Processes	GO:0032909	regulation of transforming growth factor beta2 production	-3.94876	-1.73054	3/9	1386,4088,4089	ATF2,SMAD3,SMAD4
9_Member	Canonical Pathways	M2	PID SMAD2 3NUCLEAR PATHWAY	-3.48145	-1.38542	6/82	1026,1386,4088,4089,6497,6670	CDKN1A,ATF2,SMAD3,SMAD4,SKI,SP3
9_Member	WikiPathways	WP366	TGF-beta signaling pathway	-3.2046	-1.05678	8/133	1026,1386,3985,4088,4089,6464,6497,7341	CDKN1A,ATF2,LIMK2,SMAD3,SMAD4,SHC1,SKI,SUMO1
9_Member	Canonical Pathways	M254	PID MYC REPRESS PATHWAY	-3.14344	-1.177	5/63	1026,2966,4088,4089,84233	CDKN1A,GTF2H2,SMAD3,SMAD4,TMEM126A
9_Member	Reactome Gene Sets	R-HSA-9617828	FOXO-mediated transcription of cell cycle genes	-3.06954	-1.11946	3/17	1026,4088,4089	CDKN1A,SMAD3,SMAD4
9_Member	WikiPathways	WP2853	Endoderm differentiation	-2.94074	-0.917189	8/146	4088,4089,6478,9646,10153,27244,51701,85363	SMAD3,SMAD4,SIAH2,CTR9,CEBPZ,SESN1,NLK,TRIM5
9_Member	WikiPathways	WP4216	Chromosomal and microsatellite instability in colorectal cancer	-2.82686	-0.954485	5/74	1026,4088,4089,5900,26060	CDKN1A,SMAD3,SMAD4,RALGDS,APPL1
9_Member	Reactome Gene Sets	R-HSA-2173793	Transcriptional activity of SMAD2/SMAD3:SMAD4 heterotrimer	-2.75313	-0.907388	4/46	892,4088,4089,6497	CCNC,SMAD3,SMAD4,SKI
9_Member	WikiPathways	WP4482	Vitamin D in inflammatory diseases	-2.73259	-0.899764	3/22	4088,4089,5534	SMAD3,SMAD4,PPP3R1
9_Member	Canonical Pathways	M66	PID MYC ACTIV PATHWAY	-2.70079	-0.88539	5/79	648,4088,4089,6880,92140	BMI1,SMAD3,SMAD4,TAF9,MTDH
9_Member	WikiPathways	WP3646	Hepatitis C and hepatocellular carcinoma	-2.61878	-0.835375	4/50	1026,4088,4089,7410	CDKN1A,SMAD3,SMAD4,VAV2
9_Member	WikiPathways	WP3668	Hypothesized pathways in pathogenesis of cardiovascular disease	-2.5692	-0.801592	3/25	4088,4089,6464	SMAD3,SMAD4,SHC1
9_Member	Canonical Pathways	M286	PID TGFBR PATHWAY	-2.49628	-0.750284	4/54	4088,4089,6464,83939	SMAD3,SMAD4,SHC1,EIF2A
9_Member	WikiPathways	WP4263	Pancreatic adenocarcinoma pathway	-2.47502	-0.734357	5/89	1026,4088,4089,5580,5900	CDKN1A,SMAD3,SMAD4,PRKCD,RALGDS
9_Member	Reactome Gene Sets	R-HSA-2173795	Downregulation of SMAD2/3:SMAD4 transcriptional activity	-2.472	-0.734357	3/27	4088,4089,6497	SMAD3,SMAD4,SKI
9_Member	WikiPathways	WP5036	Angiotensin II receptor type 1 pathway	-2.42638	-0.704974	3/28	59,4088,4089	ACTA2,SMAD3,SMAD4
9_Member	WikiPathways	WP560	TGF-beta receptor signaling	-2.38389	-0.668417	4/58	3265,4088,4089,6497	HRAS,SMAD3,SMAD4,SKI
9_Member	KEGG Pathway	ko05210	Colorectal cancer	-2.33104	-0.634754	4/60	4088,4089,5900,26060	SMAD3,SMAD4,RALGDS,APPL1
9_Member	WikiPathways	WP4816	TGF-beta receptor signaling in skeletal dysplasias	-2.28021	-0.599652	4/62	3265,4088,4089,6497	HRAS,SMAD3,SMAD4,SKI
9_Member	Reactome Gene Sets	R-HSA-2173796	SMAD2/SMAD3:SMAD4 heterotrimer regulates transcription	-2.26061	-0.582764	3/32	892,4088,4089	CCNC,SMAD3,SMAD4
9_Member	WikiPathways	WP4838	Regucalcin in proximal tubule epithelial kidney cells	-2.22281	-0.560881	3/33	59,4089,5534	ACTA2,SMAD4,PPP3R1
10_Summary	GO Biological Processes	GO:0043112	receptor metabolic process	-5.3074	-2.45165	12/167	20,408,1759,2966,4035,4043,5534,5641,9463,23513,55681,116985,2580,3339,23396,26060,192683,3925,23295	ABCA2,ARRB1,DNM1,GTF2H2,LRP1,LRPAP1,PPP3R1,LGMN,PICK1,SCRIB,SCYL2,ARAP1,GAK,HSPG2,PIP5K1C,APPL1,SCAMP5,STMN1,MGRN1
10_Member	GO Biological Processes	GO:0043112	receptor metabolic process	-5.3074	-2.45165	12/167	20,408,1759,2966,4035,4043,5534,5641,9463,23513,55681,116985	ABCA2,ARRB1,DNM1,GTF2H2,LRP1,LRPAP1,PPP3R1,LGMN,PICK1,SCRIB,SCYL2,ARAP1
10_Member	GO Biological Processes	GO:0031623	receptor internalization	-4.4441	-1.81559	9/114	408,1759,2966,4035,4043,5534,9463,23513,55681	ARRB1,DNM1,GTF2H2,LRP1,LRPAP1,PPP3R1,PICK1,SCRIB,SCYL2
10_Member	GO Biological Processes	GO:0006898	receptor-mediated endocytosis	-4.21829	-1.72072	13/249	20,408,1759,2580,2966,3339,4035,4043,5534,9463,23396,23513,55681	ABCA2,ARRB1,DNM1,GAK,GTF2H2,HSPG2,LRP1,LRPAP1,PPP3R1,PICK1,PIP5K1C,SCRIB,SCYL2
10_Member	GO Biological Processes	GO:0002090	regulation of receptor internalization	-3.82081	-1.49029	6/57	408,4043,5534,9463,23513,55681	ARRB1,LRPAP1,PPP3R1,PICK1,SCRIB,SCYL2
10_Member	GO Biological Processes	GO:0030100	regulation of endocytosis	-3.77493	-1.60993	10/214	20,408,1759,4035,4043,5534,23513,26060,55681,192683	ABCA2,ARRB1,DNM1,LRP1,LRPAP1,PPP3R1,SCRIB,APPL1,SCYL2,SCAMP5
10_Member	GO Biological Processes	GO:0002031	G protein-coupled receptor internalization	-3.06954	-1.11946	3/17	408,1759,2966	ARRB1,DNM1,GTF2H2
10_Member	GO Biological Processes	GO:0045744	negative regulation of G protein-coupled receptor signaling pathway	-3.00796	-0.941532	5/54	408,1759,2966,3925,23295	ARRB1,DNM1,GTF2H2,STMN1,MGRN1
10_Member	GO Biological Processes	GO:0048259	regulation of receptor-mediated endocytosis	-2.92087	-0.906327	7/114	20,408,4043,5534,9463,23513,55681	ABCA2,ARRB1,LRPAP1,PPP3R1,PICK1,SCRIB,SCYL2
10_Member	GO Biological Processes	GO:0002029	desensitization of G protein-coupled receptor signaling pathway	-2.6755	-0.869701	3/23	408,1759,2966	ARRB1,DNM1,GTF2H2
10_Member	GO Biological Processes	GO:0022401	negative adaptation of signaling pathway	-2.6755	-0.869701	3/23	408,1759,2966	ARRB1,DNM1,GTF2H2
10_Member	GO Biological Processes	GO:0023058	adaptation of signaling pathway	-2.62112	-0.835375	3/24	408,1759,2966	ARRB1,DNM1,GTF2H2
10_Member	GO Biological Processes	GO:0045807	positive regulation of endocytosis	-2.503	-0.651303	6/101	408,1759,4035,9463,26060,55681	ARRB1,DNM1,LRP1,PICK1,APPL1,SCYL2
11_Summary	KEGG Pathway	ko04142	Lysosome	-5.26622	-2.47353	3/123	2517,2760,5641,54893	FUCA1,GM2A,LGMN,MTMR10
11_Member	KEGG Pathway	ko04142	Lysosome	-5.26622	-2.47353	3/123	2517,2760,5641	FUCA1,GM2A,LGMN
11_Member	KEGG Pathway	hsa04142	Lysosome	-5.14476	-2.40466	3/135	2517,2760,5641	FUCA1,GM2A,LGMN
11_Member	Reactome Gene Sets	R-HSA-556833	Metabolism of lipids	-2.95611	-1.042	3/742	2760,5641,54893	GM2A,LGMN,MTMR10
12_Summary	Reactome Gene Sets	R-HSA-8953854	Metabolism of RNA	-5.03176	-2.33198	22/673	2058,2966,4331,5356,5580,6144,6158,6173,9652,10286,10438,10605,10978,11260,11340,23350,53938,54482,55759,79023,85313,200916	EPRS1,GTF2H2,MNAT1,PLRG1,PRKCD,RPL21,RPL28,RPL36A,TTC37,BCAS2,C1D,PAIP1,CLP1,XPOT,EXOSC8,U2SURP,PPIL3,TRMT13,WDR12,NUP37,PPIL4,RPL22L1
12_Member	Reactome Gene Sets	R-HSA-8953854	Metabolism of RNA	-5.03176	-2.33198	22/673	2058,2966,4331,5356,5580,6144,6158,6173,9652,10286,10438,10605,10978,11260,11340,23350,53938,54482,55759,79023,85313,200916	EPRS1,GTF2H2,MNAT1,PLRG1,PRKCD,RPL21,RPL28,RPL36A,TTC37,BCAS2,C1D,PAIP1,CLP1,XPOT,EXOSC8,U2SURP,PPIL3,TRMT13,WDR12,NUP37,PPIL4,RPL22L1
12_Member	Reactome Gene Sets	R-HSA-72306	tRNA processing	-2.13732	-0.501515	5/107	2058,10978,11260,54482,79023	EPRS1,CLP1,XPOT,TRMT13,NUP37
13_Summary	Reactome Gene Sets	R-HSA-381119	Unfolded Protein Response (UPR)	-4.94692	-2.30505	8/94	1054,4189,6464,7494,8894,11340,22926,27230,6782,23376,51768,54956,837,29761,51465,81542,192683,83939	CEBPG,DNAJB9,SHC1,XBP1,EIF2S2,EXOSC8,ATF6,SERP1,HSPA13,UFL1,TM7SF3,PARP16,CASP4,USP25,UBE2J1,TMX1,SCAMP5,EIF2A
13_Member	Reactome Gene Sets	R-HSA-381119	Unfolded Protein Response (UPR)	-4.94692	-2.30505	8/94	1054,4189,6464,7494,8894,11340,22926,27230	CEBPG,DNAJB9,SHC1,XBP1,EIF2S2,EXOSC8,ATF6,SERP1
13_Member	GO Biological Processes	GO:0034620	cellular response to unfolded protein	-4.87937	-2.27549	8/96	4189,6782,7494,22926,23376,27230,51768,54956	DNAJB9,HSPA13,XBP1,ATF6,UFL1,SERP1,TM7SF3,PARP16
13_Member	GO Biological Processes	GO:0035967	cellular response to topologically incorrect protein	-4.28327	-1.9284	8/116	4189,6782,7494,22926,23376,27230,51768,54956	DNAJB9,HSPA13,XBP1,ATF6,UFL1,SERP1,TM7SF3,PARP16
13_Member	GO Biological Processes	GO:0036498	IRE1-mediated unfolded protein response	-4.27377	-1.9284	4/19	4189,7494,23376,54956	DNAJB9,XBP1,UFL1,PARP16
13_Member	GO Biological Processes	GO:0006986	response to unfolded protein	-3.77676	-1.60993	8/137	4189,6782,7494,22926,23376,27230,51768,54956	DNAJB9,HSPA13,XBP1,ATF6,UFL1,SERP1,TM7SF3,PARP16
13_Member	GO Biological Processes	GO:0034976	response to endoplasmic reticulum stress	-3.77613	-1.60993	11/256	837,4189,7494,22926,23376,27230,29761,51465,54956,81542,192683	CASP4,DNAJB9,XBP1,ATF6,UFL1,SERP1,USP25,UBE2J1,PARP16,TMX1,SCAMP5
13_Member	GO Biological Processes	GO:0030968	endoplasmic reticulum unfolded protein response	-3.72534	-1.56881	6/74	4189,7494,22926,23376,27230,54956	DNAJB9,XBP1,ATF6,UFL1,SERP1,PARP16
13_Member	WikiPathways	WP3613	Photodynamic therapy-induced unfolded protein response	-3.52499	-1.41936	4/29	4189,7494,22926,83939	DNAJB9,XBP1,ATF6,EIF2A
13_Member	GO Biological Processes	GO:1900101	regulation of endoplasmic reticulum unfolded protein response	-3.46668	-1.37994	4/30	4189,7494,22926,23376	DNAJB9,XBP1,ATF6,UFL1
13_Member	GO Biological Processes	GO:0035966	response to topologically incorrect protein	-3.33891	-1.30714	8/159	4189,6782,7494,22926,23376,27230,51768,54956	DNAJB9,HSPA13,XBP1,ATF6,UFL1,SERP1,TM7SF3,PARP16
13_Member	GO Biological Processes	GO:1903573	negative regulation of response to endoplasmic reticulum stress	-2.82542	-0.954485	4/44	4189,7494,23376,29761	DNAJB9,XBP1,UFL1,USP25
13_Member	GO Biological Processes	GO:1905897	regulation of response to endoplasmic reticulum stress	-2.62961	-0.838092	5/82	4189,7494,22926,23376,29761	DNAJB9,XBP1,ATF6,UFL1,USP25
13_Member	Reactome Gene Sets	R-HSA-381038	XBP1(S) activates chaperone genes	-2.61878	-0.835375	4/50	4189,6464,7494,27230	DNAJB9,SHC1,XBP1,SERP1
13_Member	Reactome Gene Sets	R-HSA-381070	IRE1alpha activates chaperones	-2.55617	-0.792967	4/52	4189,6464,7494,27230	DNAJB9,SHC1,XBP1,SERP1
14_Summary	WikiPathways	WP4535	Envelope proteins and their potential roles in EDMD physiopathology	-4.90695	-2.27844	6/46	112,3265,3799,4088,4089,4893,59,4035,5580,6464,7410,8844,116985,1606,1759,5900,8525,10554,23396,1978,3925,3985,10254,1386,1026,26060,27244,84335,408,8036,80824,892,5495,1287,113026,2790,5534,7494,94241,9021,54700,8894,648,2617,10336,3339,784,1291,85301,25998,55288,89941,6670,1070,10111,79651	ADCY6,HRAS,KIF5B,SMAD3,SMAD4,NRAS,ACTA2,LRP1,PRKCD,SHC1,VAV2,KSR1,ARAP1,DGKA,DNM1,RALGDS,DGKZ,AGPAT1,PIP5K1C,EIF4EBP1,STMN1,LIMK2,STAM2,ATF2,CDKN1A,APPL1,SESN1,AKT1S1,ARRB1,SHOC2,DUSP16,CCNC,PPM1B,COL4A5,PLCD3,GNG10,PPP3R1,XBP1,TP53INP1,SOCS3,RRN3,EIF2S2,BMI1,GARS1,PCGF3,HSPG2,CACNB3,COL6A1,COL27A1,IBTK,RHOT1,RHOT2,SP3,CETN3,RAD50,RHBDF2
14_Member	WikiPathways	WP4535	Envelope proteins and their potential roles in EDMD physiopathology	-4.90695	-2.27844	6/46	112,3265,3799,4088,4089,4893	ADCY6,HRAS,KIF5B,SMAD3,SMAD4,NRAS
14_Member	Canonical Pathways	M186	PID PDGFRB PATHWAY	-4.79013	-2.2302	9/129	59,3265,4035,4893,5580,6464,7410,8844,116985	ACTA2,HRAS,LRP1,NRAS,PRKCD,SHC1,VAV2,KSR1,ARAP1
14_Member	KEGG Pathway	ko04072	Phospholipase D signaling pathway	-4.34138	-1.75133	10/146	112,1606,1759,3265,4893,5900,6464,8525,10554,23396	ADCY6,DGKA,DNM1,HRAS,NRAS,RALGDS,SHC1,DGKZ,AGPAT1,PIP5K1C
14_Member	Reactome Gene Sets	R-HSA-167044	Signalling to RAS	-4.18072	-1.85725	4/20	3265,4893,5900,6464	HRAS,NRAS,RALGDS,SHC1
14_Member	Reactome Gene Sets	R-HSA-9034864	Activated NTRK3 signals through RAS	-4.12121	-1.8233	3/8	3265,4893,6464	HRAS,NRAS,SHC1
14_Member	Reactome Gene Sets	R-HSA-1250196	SHC1 events in ERBB2 signaling	-4.00951	-1.76589	4/22	3265,4893,5580,6464	HRAS,NRAS,PRKCD,SHC1
14_Member	Reactome Gene Sets	R-HSA-2428933	SHC-related events triggered by IGF1R	-3.94876	-1.73054	3/9	3265,4893,6464	HRAS,NRAS,SHC1
14_Member	Reactome Gene Sets	R-HSA-9026519	Activated NTRK2 signals through RAS	-3.94876	-1.73054	3/9	3265,4893,6464	HRAS,NRAS,SHC1
14_Member	WikiPathways	WP437	EGF/EGFR signaling pathway	-3.9404	-1.55624	10/163	1759,1978,3265,3925,3985,5580,5900,6464,7410,10254	DNM1,EIF4EBP1,HRAS,STMN1,LIMK2,PRKCD,RALGDS,SHC1,VAV2,STAM2
14_Member	KEGG Pathway	hsa04072	Phospholipase D signaling pathway	-3.9404	-1.55624	10/163	112,1606,1759,3265,4893,5900,6464,8525,10554,23396	ADCY6,DGKA,DNM1,HRAS,NRAS,RALGDS,SHC1,DGKZ,AGPAT1,PIP5K1C
14_Member	Canonical Pathways	M17200	SA B CELL RECEPTOR COMPLEXES	-3.85506	-1.66735	4/24	1386,3265,6464,7410	ATF2,HRAS,SHC1,VAV2
14_Member	KEGG Pathway	ko05220	Chronic myeloid leukemia	-3.82485	-1.64865	6/71	1026,3265,4088,4089,4893,6464	CDKN1A,HRAS,SMAD3,SMAD4,NRAS,SHC1
14_Member	KEGG Pathway	hsa04211	Longevity regulating pathway	-3.78996	-1.47438	8/109	112,1386,1978,3265,4893,26060,27244,84335	ADCY6,ATF2,EIF4EBP1,HRAS,NRAS,APPL1,SESN1,AKT1S1
14_Member	Canonical Pathways	M164	PID ERBB1 DOWNSTREAM PATHWAY	-3.72288	-1.56881	7/105	1386,3265,4893,5580,5900,7410,8844	ATF2,HRAS,NRAS,PRKCD,RALGDS,VAV2,KSR1
14_Member	Reactome Gene Sets	R-HSA-8851805	MET activates RAS signaling	-3.66282	-1.52203	3/11	3265,4893,6464	HRAS,NRAS,SHC1
14_Member	Reactome Gene Sets	R-HSA-9634285	Constitutive Signaling by Overexpressed ERBB2	-3.66282	-1.52203	3/11	3265,4893,6464	HRAS,NRAS,SHC1
14_Member	WikiPathways	WP4659	Gastrin signaling pathway	-3.50303	-1.40221	7/114	408,1026,1386,1978,3265,5580,6464	ARRB1,CDKN1A,ATF2,EIF4EBP1,HRAS,PRKCD,SHC1
14_Member	KEGG Pathway	hsa05220	Chronic myeloid leukemia	-3.48145	-1.38542	6/82	1026,3265,4088,4089,4893,6464	CDKN1A,HRAS,SMAD3,SMAD4,NRAS,SHC1
14_Member	Reactome Gene Sets	R-HSA-2424491	DAP12 signaling	-3.46668	-1.37994	4/30	3265,4893,6464,7410	HRAS,NRAS,SHC1,VAV2
14_Member	WikiPathways	WP2870	Extracellular vesicle-mediated signaling in recipient cells	-3.46668	-1.37994	4/30	3265,4088,4089,4893	HRAS,SMAD3,SMAD4,NRAS
14_Member	Reactome Gene Sets	R-HSA-171007	p38MAPK events	-3.43119	-1.35958	3/13	3265,4893,5900	HRAS,NRAS,RALGDS
14_Member	Reactome Gene Sets	R-HSA-6802957	Oncogenic MAPK signaling	-3.42482	-1.35839	6/84	408,3265,4893,8036,8844,80824	ARRB1,HRAS,NRAS,SHOC2,KSR1,DUSP16
14_Member	Reactome Gene Sets	R-HSA-5663202	Diseases of signal transduction by growth factor receptors and second messengers	-3.3579	-1.31565	14/433	408,892,1026,3265,3799,4088,4089,4893,5495,6464,8036,8844,80824,84335	ARRB1,CCNC,CDKN1A,HRAS,KIF5B,SMAD3,SMAD4,NRAS,PPM1B,SHC1,SHOC2,KSR1,DUSP16,AKT1S1
14_Member	Reactome Gene Sets	R-HSA-2871796	FCERI mediated MAPK activation	-3.35637	-1.31565	4/32	3265,4893,6464,7410	HRAS,NRAS,SHC1,VAV2
14_Member	Reactome Gene Sets	R-HSA-1250347	SHC1 events in ERBB4 signaling	-3.33008	-1.30714	3/14	3265,4893,6464	HRAS,NRAS,SHC1
14_Member	Reactome Gene Sets	R-HSA-180336	SHC1 events in EGFR signaling	-3.33008	-1.30714	3/14	3265,4893,6464	HRAS,NRAS,SHC1
14_Member	Reactome Gene Sets	R-HSA-9027284	Erythropoietin activates RAS	-3.33008	-1.30714	3/14	3265,4893,6464	HRAS,NRAS,SHC1
14_Member	WikiPathways	WP3676	BDNF-TrkB signaling	-3.3041	-1.28955	4/33	1978,3265,4893,6464	EIF4EBP1,HRAS,NRAS,SHC1
14_Member	KEGG Pathway	ko04933	AGE-RAGE signaling pathway in diabetic complications	-3.28423	-1.10803	7/99	1287,3265,4088,4089,4893,5580,113026	COL4A5,HRAS,SMAD3,SMAD4,NRAS,PRKCD,PLCD3
14_Member	KEGG Pathway	ko05231	Choline metabolism in cancer	-3.28423	-1.10803	7/99	1606,1978,3265,4893,5900,8525,23396	DGKA,EIF4EBP1,HRAS,NRAS,RALGDS,DGKZ,PIP5K1C
14_Member	Reactome Gene Sets	R-HSA-187687	Signalling to ERKs	-3.25358	-1.24679	4/34	3265,4893,5900,6464	HRAS,NRAS,RALGDS,SHC1
14_Member	Reactome Gene Sets	R-HSA-5637810	Constitutive Signaling by EGFRvIII	-3.23679	-1.23573	3/15	3265,4893,6464	HRAS,NRAS,SHC1
14_Member	Reactome Gene Sets	R-HSA-5637812	Signaling by EGFRvIII in Cancer	-3.23679	-1.23573	3/15	3265,4893,6464	HRAS,NRAS,SHC1
14_Member	WikiPathways	WP3929	Chemokine signaling pathway	-3.23246	-1.2333	8/165	112,408,2790,3265,4893,5580,6464,7410	ADCY6,ARRB1,GNG10,HRAS,NRAS,PRKCD,SHC1,VAV2
14_Member	Canonical Pathways	M127	PID ERBB1 RECEPTOR PROXIMAL PATHWAY	-3.20471	-1.21303	4/35	3265,4893,6464,23396	HRAS,NRAS,SHC1,PIP5K1C
14_Member	WikiPathways	WP244	Alpha 6 beta 4 signaling pathway	-3.20471	-1.21303	4/35	1978,3265,5580,6464	EIF4EBP1,HRAS,PRKCD,SHC1
14_Member	KEGG Pathway	hsa05166	HTLV-I infection	-3.16031	-1.1821	10/256	112,1026,1386,3265,4088,4089,4893,5534,7494,94241	ADCY6,CDKN1A,ATF2,HRAS,SMAD3,SMAD4,NRAS,PPP3R1,XBP1,TP53INP1
14_Member	KEGG Pathway	ko05166	HTLV-I infection	-3.16031	-1.1821	10/256	112,1026,1386,3265,4088,4089,4893,5534,7494,94241	ADCY6,CDKN1A,ATF2,HRAS,SMAD3,SMAD4,NRAS,PPP3R1,XBP1,TP53INP1
14_Member	Canonical Pathways	M271	PID PI3K PLC TRK PATHWAY	-3.15739	-1.1821	4/36	3265,4893,5580,6464	HRAS,NRAS,PRKCD,SHC1
14_Member	Reactome Gene Sets	R-HSA-5673000	RAF activation	-3.15739	-1.1821	4/36	3265,4893,8036,8844	HRAS,NRAS,SHOC2,KSR1
14_Member	Reactome Gene Sets	R-HSA-6802948	Signaling by high-kinase activity BRAF mutants	-3.15739	-1.1821	4/36	408,3265,4893,8844	ARRB1,HRAS,NRAS,KSR1
14_Member	Reactome Gene Sets	R-HSA-9665348	Signaling by ERBB2 ECD mutants	-3.15024	-1.18028	3/16	3265,4893,6464	HRAS,NRAS,SHC1
14_Member	Reactome Gene Sets	R-HSA-9703648	Signaling by FLT3 ITD and TKD mutants	-3.15024	-1.18028	3/16	1026,3265,4893	CDKN1A,HRAS,NRAS
14_Member	WikiPathways	WP4674	Head and neck squamous cell carcinoma	-3.13852	-1.01577	6/76	1026,1978,3265,4089,4893,27244	CDKN1A,EIF4EBP1,HRAS,SMAD4,NRAS,SESN1
14_Member	KEGG Pathway	hsa04933	AGE-RAGE signaling pathway in diabetic complications	-3.08252	-0.993467	7/107	1287,3265,4088,4089,4893,5580,113026	COL4A5,HRAS,SMAD3,SMAD4,NRAS,PRKCD,PLCD3
14_Member	KEGG Pathway	hsa05231	Choline metabolism in cancer	-3.08252	-0.993467	7/107	1606,1978,3265,4893,5900,8525,23396	DGKA,EIF4EBP1,HRAS,NRAS,RALGDS,DGKZ,PIP5K1C
14_Member	Canonical Pathways	M18895	SA TRKA RECEPTOR	-3.06954	-1.11946	3/17	1026,3265,6464	CDKN1A,HRAS,SHC1
14_Member	Reactome Gene Sets	R-HSA-9034015	Signaling by NTRK3 (TRKC)	-3.06954	-1.11946	3/17	3265,4893,6464	HRAS,NRAS,SHC1
14_Member	WikiPathways	WP23	B cell receptor signaling pathway	-3.06851	-1.11946	6/98	1386,3265,5580,6464,7410,23396	ATF2,HRAS,PRKCD,SHC1,VAV2,PIP5K1C
14_Member	KEGG Pathway	ko04915	Estrogen signaling pathway	-3.06851	-1.11946	6/98	112,1386,3265,4893,5580,6464	ADCY6,ATF2,HRAS,NRAS,PRKCD,SHC1
14_Member	Reactome Gene Sets	R-HSA-210993	Tie2 Signaling	-2.99397	-1.06765	3/18	3265,4893,6464	HRAS,NRAS,SHC1
14_Member	Reactome Gene Sets	R-HSA-5654704	SHC-mediated cascade:FGFR3	-2.99397	-1.06765	3/18	3265,4893,6464	HRAS,NRAS,SHC1
14_Member	Canonical Pathways	M62	PID EPHB FWD PATHWAY	-2.98197	-1.06355	4/40	1759,3265,4893,6464	DNM1,HRAS,NRAS,SHC1
14_Member	Reactome Gene Sets	R-HSA-5674135	MAP2K and MAPK activation	-2.98197	-1.06355	4/40	408,3265,4893,8844	ARRB1,HRAS,NRAS,KSR1
14_Member	WikiPathways	WP4871	Kisspeptin/kisspeptin receptor system in the ovary	-2.98197	-1.06355	4/40	408,3265,4893,5580	ARRB1,HRAS,NRAS,PRKCD
14_Member	Canonical Pathways	M122	PID IL2 1PATHWAY	-2.97157	-0.917635	5/55	3265,4893,6464,9021,10254	HRAS,NRAS,SHC1,SOCS3,STAM2
14_Member	Canonical Pathways	M121	PID MTOR 4PATHWAY	-2.96341	-1.04656	5/69	1978,3265,4893,54700,84335	EIF4EBP1,HRAS,NRAS,RRN3,AKT1S1
14_Member	KEGG Pathway	ko04062	Chemokine signaling pathway	-2.95574	-1.042	8/182	112,408,2790,3265,4893,5580,6464,7410	ADCY6,ARRB1,GNG10,HRAS,NRAS,PRKCD,SHC1,VAV2
14_Member	Canonical Pathways	M214	PID ERBB1 INTERNALIZATION PATHWAY	-2.94121	-1.03056	4/41	1759,3265,4893,6464	DNM1,HRAS,NRAS,SHC1
14_Member	Canonical Pathways	M233	PID EPO PATHWAY	-2.93566	-0.917189	4/33	3265,6464,7410,9021	HRAS,SHC1,VAV2,SOCS3
14_Member	Reactome Gene Sets	R-HSA-1236382	Constitutive Signaling by Ligand-Responsive EGFR Cancer Variants	-2.92296	-1.01994	3/19	3265,4893,6464	HRAS,NRAS,SHC1
14_Member	Reactome Gene Sets	R-HSA-5637815	Signaling by Ligand-Responsive EGFR Variants in Cancer	-2.92296	-1.01994	3/19	3265,4893,6464	HRAS,NRAS,SHC1
14_Member	Reactome Gene Sets	R-HSA-9703465	Signaling by FLT3 fusion proteins	-2.92296	-1.01994	3/19	1026,3265,4893	CDKN1A,HRAS,NRAS
14_Member	WikiPathways	WP2380	Brain-derived neurotrophic factor (BDNF) signaling pathway	-2.89953	-1.00103	7/144	1978,3265,5580,6464,7410,8844,8894	EIF4EBP1,HRAS,PRKCD,SHC1,VAV2,KSR1,EIF2S2
14_Member	KEGG Pathway	hsa04371	Apelin signaling pathway	-2.86495	-0.979217	7/146	59,112,2790,3265,4088,4089,4893	ACTA2,ADCY6,GNG10,HRAS,SMAD3,SMAD4,NRAS
14_Member	Canonical Pathways	M222	PID CXCR3 PATHWAY	-2.86299	-0.979217	4/43	408,1759,3265,4893	ARRB1,DNM1,HRAS,NRAS
14_Member	Reactome Gene Sets	R-HSA-5675221	Negative regulation of MAPK pathway	-2.86299	-0.979217	4/43	3265,4893,8844,80824	HRAS,NRAS,KSR1,DUSP16
14_Member	Reactome Gene Sets	R-HSA-9656223	Signaling by RAF1 mutants	-2.86299	-0.979217	4/43	408,3265,4893,8844	ARRB1,HRAS,NRAS,KSR1
14_Member	Reactome Gene Sets	R-HSA-5654719	SHC-mediated cascade:FGFR4	-2.85599	-0.973659	3/20	3265,4893,6464	HRAS,NRAS,SHC1
14_Member	WikiPathways	WP615	Senescence and autophagy in cancer	-2.8495	-0.970048	6/108	648,1026,3265,4088,4089,84335	BMI1,CDKN1A,HRAS,SMAD3,SMAD4,AKT1S1
14_Member	Reactome Gene Sets	R-HSA-5218921	VEGFR2 mediated cell proliferation	-2.79265	-0.932823	3/21	3265,4893,5580	HRAS,NRAS,PRKCD
14_Member	Reactome Gene Sets	R-HSA-5654688	SHC-mediated cascade:FGFR1	-2.79265	-0.932823	3/21	3265,4893,6464	HRAS,NRAS,SHC1
14_Member	Reactome Gene Sets	R-HSA-2172127	DAP12 interactions	-2.78882	-0.932823	4/45	3265,4893,6464,7410	HRAS,NRAS,SHC1,VAV2
14_Member	KEGG Pathway	hsa04550	Signaling pathways regulating pluripotency of stem cells	-2.74846	-0.907388	7/153	648,2617,3265,4088,4089,4893,10336	BMI1,GARS1,HRAS,SMAD3,SMAD4,NRAS,PCGF3
14_Member	Reactome Gene Sets	R-HSA-9665686	Signaling by ERBB2 TMD/JMD mutants	-2.73259	-0.899764	3/22	3265,4893,6464	HRAS,NRAS,SHC1
14_Member	WikiPathways	WP4666	Hepatitis B infection	-2.73237	-0.899764	7/154	1026,1386,3265,3339,4088,4089,4893	CDKN1A,ATF2,HRAS,HSPG2,SMAD3,SMAD4,NRAS
14_Member	Reactome Gene Sets	R-HSA-6802946	Signaling by moderate kinase activity BRAF mutants	-2.71832	-0.896496	4/47	408,3265,4893,8844	ARRB1,HRAS,NRAS,KSR1
14_Member	Reactome Gene Sets	R-HSA-6802949	Signaling by RAS mutants	-2.71832	-0.896496	4/47	408,3265,4893,8844	ARRB1,HRAS,NRAS,KSR1
14_Member	Reactome Gene Sets	R-HSA-6802955	Paradoxical activation of RAF signaling by kinase inactive BRAF	-2.71832	-0.896496	4/47	408,3265,4893,8844	ARRB1,HRAS,NRAS,KSR1
14_Member	Reactome Gene Sets	R-HSA-9649948	Signaling downstream of RAS mutants	-2.71832	-0.896496	4/47	408,3265,4893,8844	ARRB1,HRAS,NRAS,KSR1
14_Member	Reactome Gene Sets	R-HSA-187037	Signaling by NTRK1 (TRKA)	-2.7104	-0.892327	6/115	1386,1759,3265,4893,5900,6464	ATF2,DNM1,HRAS,NRAS,RALGDS,SHC1
14_Member	WikiPathways	WP710	DNA damage response (only ATM dependent)	-2.7104	-0.892327	6/115	1026,3265,4088,4089,4893,6464	CDKN1A,HRAS,SMAD3,SMAD4,NRAS,SHC1
14_Member	Reactome Gene Sets	R-HSA-375165	NCAM signaling for neurite out-growth	-2.70603	-0.779448	5/63	784,1287,1291,3265,4893	CACNB3,COL4A5,COL6A1,HRAS,NRAS
14_Member	Reactome Gene Sets	R-HSA-6806834	Signaling by MET	-2.70079	-0.88539	5/79	3265,4893,6464,10254,85301	HRAS,NRAS,SHC1,STAM2,COL27A1
14_Member	Reactome Gene Sets	R-HSA-5654699	SHC-mediated cascade:FGFR2	-2.6755	-0.869701	3/23	3265,4893,6464	HRAS,NRAS,SHC1
14_Member	KEGG Pathway	hsa04062	Chemokine signaling pathway	-2.6701	-0.867135	8/202	112,408,2790,3265,4893,5580,6464,7410	ADCY6,ARRB1,GNG10,HRAS,NRAS,PRKCD,SHC1,VAV2
14_Member	Reactome Gene Sets	R-HSA-1227986	Signaling by ERBB2	-2.61878	-0.835375	4/50	3265,4893,5580,6464	HRAS,NRAS,PRKCD,SHC1
14_Member	Reactome Gene Sets	R-HSA-177929	Signaling by EGFR	-2.61878	-0.835375	4/50	3265,4893,6464,10254	HRAS,NRAS,SHC1,STAM2
14_Member	Reactome Gene Sets	R-HSA-1643713	Signaling by EGFR in Cancer	-2.5692	-0.801592	3/25	3265,4893,6464	HRAS,NRAS,SHC1
14_Member	Reactome Gene Sets	R-HSA-5654708	Downstream signaling of activated FGFR3	-2.5692	-0.801592	3/25	3265,4893,6464	HRAS,NRAS,SHC1
14_Member	Reactome Gene Sets	R-HSA-9006115	Signaling by NTRK2 (TRKB)	-2.5692	-0.801592	3/25	3265,4893,6464	HRAS,NRAS,SHC1
14_Member	Reactome Gene Sets	R-HSA-9006335	Signaling by Erythropoietin	-2.5692	-0.801592	3/25	3265,4893,6464	HRAS,NRAS,SHC1
14_Member	Reactome Gene Sets	R-HSA-9664565	Signaling by ERBB2 KD Mutants	-2.5692	-0.801592	3/25	3265,4893,6464	HRAS,NRAS,SHC1
14_Member	KEGG Pathway	ko04012	ErbB signaling pathway	-2.53942	-0.778406	5/86	1026,1978,3265,4893,6464	CDKN1A,EIF4EBP1,HRAS,NRAS,SHC1
14_Member	Reactome Gene Sets	R-HSA-1227990	Signaling by ERBB2 in Cancer	-2.51956	-0.763696	3/26	3265,4893,6464	HRAS,NRAS,SHC1
14_Member	Reactome Gene Sets	R-HSA-5654716	Downstream signaling of activated FGFR4	-2.472	-0.734357	3/27	3265,4893,6464	HRAS,NRAS,SHC1
14_Member	WikiPathways	WP673	ErbB signaling pathway	-2.43354	-0.706108	5/91	1026,1978,3265,4893,6464	CDKN1A,EIF4EBP1,HRAS,NRAS,SHC1
14_Member	Reactome Gene Sets	R-HSA-9682385	FLT3 signaling in disease	-2.42638	-0.704974	3/28	1026,3265,4893	CDKN1A,HRAS,NRAS
14_Member	KEGG Pathway	hsa05161	Hepatitis B	-2.39573	-0.676308	7/177	1026,1386,3265,3339,4088,4089,4893	CDKN1A,ATF2,HRAS,HSPG2,SMAD3,SMAD4,NRAS
14_Member	Canonical Pathways	M125	PID IGF1 PATHWAY	-2.38255	-0.668061	3/29	3265,5580,6464	HRAS,PRKCD,SHC1
14_Member	Reactome Gene Sets	R-HSA-166520	Signaling by NTRKs	-2.38037	-0.666859	6/134	1386,1759,3265,4893,5900,6464	ATF2,DNM1,HRAS,NRAS,RALGDS,SHC1
14_Member	KEGG Pathway	hsa04012	ErbB signaling pathway	-2.37334	-0.660801	5/94	1026,1978,3265,4893,6464	CDKN1A,EIF4EBP1,HRAS,NRAS,SHC1
14_Member	Reactome Gene Sets	R-HSA-5654696	Downstream signaling of activated FGFR2	-2.34039	-0.634754	3/30	3265,4893,6464	HRAS,NRAS,SHC1
14_Member	WikiPathways	WP3844	PI3K-AKT-mTOR signaling pathway and therapeutic opportunities	-2.34039	-0.634754	3/30	1978,3265,4893	EIF4EBP1,HRAS,NRAS
14_Member	WikiPathways	WP35	G protein signaling pathways	-2.33449	-0.634754	5/96	112,2790,3265,4893,5580	ADCY6,GNG10,HRAS,NRAS,PRKCD
14_Member	KEGG Pathway	hsa01522	Endocrine resistance	-2.33449	-0.634754	5/96	112,1026,3265,4893,6464	ADCY6,CDKN1A,HRAS,NRAS,SHC1
14_Member	KEGG Pathway	ko01522	Endocrine resistance	-2.33449	-0.634754	5/96	112,1026,3265,4893,6464	ADCY6,CDKN1A,HRAS,NRAS,SHC1
14_Member	Canonical Pathways	M187	PID TRKR PATHWAY	-2.30538	-0.613821	4/61	1759,3265,4893,6464	DNM1,HRAS,NRAS,SHC1
14_Member	KEGG Pathway	ko04550	Signaling pathways regulating pluripotency of stem cells	-2.30324	-0.613519	6/139	648,3265,4088,4089,4893,10336	BMI1,HRAS,SMAD3,SMAD4,NRAS,PCGF3
14_Member	Reactome Gene Sets	R-HSA-5654687	Downstream signaling of activated FGFR1	-2.29978	-0.610978	3/31	3265,4893,6464	HRAS,NRAS,SHC1
14_Member	WikiPathways	WP4223	Ras signaling	-2.29181	-0.606693	7/185	2790,3265,4893,5900,6464,8036,8844	GNG10,HRAS,NRAS,RALGDS,SHC1,SHOC2,KSR1
14_Member	KEGG Pathway	hsa04213	Longevity regulating pathway - multiple species	-2.28021	-0.599652	4/62	112,3265,4893,84335	ADCY6,HRAS,NRAS,AKT1S1
14_Member	KEGG Pathway	ko04213	Longevity regulating pathway - multiple species	-2.28021	-0.599652	4/62	112,3265,4893,84335	ADCY6,HRAS,NRAS,AKT1S1
14_Member	Canonical Pathways	M10	PID BCR 5PATHWAY	-2.25552	-0.582152	4/63	3265,6464,7410,25998	HRAS,SHC1,VAV2,IBTK
14_Member	KEGG Pathway	ko05214	Glioma	-2.23128	-0.563234	4/64	1026,3265,4893,6464	CDKN1A,HRAS,NRAS,SHC1
14_Member	Reactome Gene Sets	R-HSA-2871809	FCERI mediated Ca+2 mobilization	-2.22281	-0.560881	3/33	5534,6464,7410	PPP3R1,SHC1,VAV2
14_Member	KEGG Pathway	hsa04915	Estrogen signaling pathway	-2.21525	-0.554195	6/145	112,1386,3265,4893,5580,6464	ADCY6,ATF2,HRAS,NRAS,PRKCD,SHC1
14_Member	KEGG Pathway	ko04137	Mitophagy - animal	-2.20749	-0.548163	4/65	3265,4893,55288,89941	HRAS,NRAS,RHOT1,RHOT2
14_Member	Canonical Pathways	M270	PID MAPK TRK PATHWAY	-2.18627	-0.533799	3/34	3265,4893,5580	HRAS,NRAS,PRKCD
14_Member	WikiPathways	WP400	p38 MAPK signaling pathway	-2.18627	-0.533799	3/34	1386,3265,6464	ATF2,HRAS,SHC1
14_Member	WikiPathways	WP2324	AGE/RAGE pathway	-2.18413	-0.533351	4/66	1386,4088,5580,6464	ATF2,SMAD3,PRKCD,SHC1
14_Member	Reactome Gene Sets	R-HSA-6802952	Signaling by BRAF and RAF1 fusions	-2.16118	-0.517125	4/67	408,3265,4893,8844	ARRB1,HRAS,NRAS,KSR1
14_Member	KEGG Pathway	hsa04137	Mitophagy - animal	-2.16118	-0.517125	4/67	3265,4893,55288,89941	HRAS,NRAS,RHOT1,RHOT2
14_Member	WikiPathways	WP4321	Thermogenesis	-2.12065	-0.489727	5/108	112,1386,3265,4893,84335	ADCY6,ATF2,HRAS,NRAS,AKT1S1
14_Member	KEGG Pathway	ko04921	Oxytocin signaling pathway	-2.11838	-0.488263	6/152	112,784,1026,3265,4893,5534	ADCY6,CACNB3,CDKN1A,HRAS,NRAS,PPP3R1
14_Member	Canonical Pathways	M22	PID GMCSF PATHWAY	-2.11673	-0.487424	3/36	3265,4893,6464	HRAS,NRAS,SHC1
14_Member	WikiPathways	WP481	Insulin signaling	-2.09045	-0.360994	7/161	1978,3265,3799,5580,6464,7494,9021	EIF4EBP1,HRAS,KIF5B,PRKCD,SHC1,XBP1,SOCS3
14_Member	WikiPathways	WP4341	Non-genomic actions of 1,25 dihydroxyvitamin D3	-2.07332	-0.451204	4/71	3265,4893,5580,6670	HRAS,NRAS,PRKCD,SP3
14_Member	KEGG Pathway	ko04662	B cell receptor signaling pathway	-2.07332	-0.451204	4/71	3265,4893,5534,7410	HRAS,NRAS,PPP3R1,VAV2
14_Member	WikiPathways	WP4262	Breast cancer pathway	-2.05268	-0.441831	6/157	1026,1070,3265,4893,6464,10111	CDKN1A,CETN3,HRAS,NRAS,SHC1,RAD50
14_Member	KEGG Pathway	hsa04660	T cell receptor signaling pathway	-2.04012	-0.433328	5/113	3265,4893,5534,7410,79651	HRAS,NRAS,PPP3R1,VAV2,RHBDF2
14_Member	KEGG Pathway	hsa05216	Thyroid cancer	-2.02026	-0.418275	3/39	1026,3265,4893	CDKN1A,HRAS,NRAS
14_Member	KEGG Pathway	hsa04921	Oxytocin signaling pathway	-2.00209	-0.406859	6/161	112,784,1026,3265,4893,5534	ADCY6,CACNB3,CDKN1A,HRAS,NRAS,PPP3R1
15_Summary	GO Biological Processes	GO:1904951	positive regulation of establishment of protein localization	-4.75314	-2.21179	14/319	784,3265,3799,4035,4088,5580,10155,27230,51124,51768,79752,79778,80184,153241,301,7341,9463,23514,51465,55754,79651,20,55288,92840,3985,26060,55166,8548,23513,51130,55327	CACNB3,HRAS,KIF5B,LRP1,SMAD3,PRKCD,TRIM28,SERP1,IER3IP1,TM7SF3,ZFAND1,MICALL2,CEP290,CEP120,ANXA1,SUMO1,PICK1,SPIDR,UBE2J1,TMEM30A,RHBDF2,ABCA2,RHOT1,REEP6,LIMK2,APPL1,CENPQ,BLZF1,SCRIB,ASB3,LIN7C
15_Member	GO Biological Processes	GO:1904951	positive regulation of establishment of protein localization	-4.75314	-2.21179	14/319	784,3265,3799,4035,4088,5580,10155,27230,51124,51768,79752,79778,80184,153241	CACNB3,HRAS,KIF5B,LRP1,SMAD3,PRKCD,TRIM28,SERP1,IER3IP1,TM7SF3,ZFAND1,MICALL2,CEP290,CEP120
15_Member	GO Biological Processes	GO:0070201	regulation of establishment of protein localization	-4.48641	-1.83308	21/539	301,784,3265,3799,4035,4088,5580,7341,9463,10155,23514,27230,51124,51465,51768,55754,79651,79752,79778,80184,153241	ANXA1,CACNB3,HRAS,KIF5B,LRP1,SMAD3,PRKCD,SUMO1,PICK1,TRIM28,SPIDR,SERP1,IER3IP1,UBE2J1,TM7SF3,TMEM30A,RHBDF2,ZFAND1,MICALL2,CEP290,CEP120
15_Member	GO Biological Processes	GO:0051222	positive regulation of protein transport	-4.35357	-1.95857	13/303	784,3265,3799,4035,4088,5580,10155,27230,51124,51768,79752,79778,80184	CACNB3,HRAS,KIF5B,LRP1,SMAD3,PRKCD,TRIM28,SERP1,IER3IP1,TM7SF3,ZFAND1,MICALL2,CEP290
15_Member	GO Biological Processes	GO:0033157	regulation of intracellular protein transport	-4.2038	-1.86821	11/229	784,3265,3799,4088,5580,7341,10155,51465,79752,79778,80184	CACNB3,HRAS,KIF5B,SMAD3,PRKCD,SUMO1,TRIM28,UBE2J1,ZFAND1,MICALL2,CEP290
15_Member	GO Biological Processes	GO:0090316	positive regulation of intracellular protein transport	-4.05572	-1.78473	9/160	784,3265,3799,4088,5580,10155,79752,79778,80184	CACNB3,HRAS,KIF5B,SMAD3,PRKCD,TRIM28,ZFAND1,MICALL2,CEP290
15_Member	GO Biological Processes	GO:0032386	regulation of intracellular transport	-3.98863	-1.57712	15/337	20,784,3265,3799,4088,5580,7341,10155,51465,55288,55754,79752,79778,80184,92840	ABCA2,CACNB3,HRAS,KIF5B,SMAD3,PRKCD,SUMO1,TRIM28,UBE2J1,RHOT1,TMEM30A,ZFAND1,MICALL2,CEP290,REEP6
15_Member	GO Biological Processes	GO:0051223	regulation of protein transport	-3.8189	-1.49029	19/514	301,784,3265,3799,4035,4088,5580,7341,9463,10155,27230,51124,51465,51768,55754,79651,79752,79778,80184	ANXA1,CACNB3,HRAS,KIF5B,LRP1,SMAD3,PRKCD,SUMO1,PICK1,TRIM28,SERP1,IER3IP1,UBE2J1,TM7SF3,TMEM30A,RHBDF2,ZFAND1,MICALL2,CEP290
15_Member	GO Biological Processes	GO:0032388	positive regulation of intracellular transport	-3.3016	-1.28901	9/202	784,3265,3799,4088,5580,10155,79752,79778,80184	CACNB3,HRAS,KIF5B,SMAD3,PRKCD,TRIM28,ZFAND1,MICALL2,CEP290
15_Member	GO Biological Processes	GO:1903827	regulation of cellular protein localization	-3.24169	-1.08041	18/527	20,784,3265,3799,3985,4035,4088,5580,7341,10155,23514,26060,51465,55166,55754,79752,79778,80184	ABCA2,CACNB3,HRAS,KIF5B,LIMK2,LRP1,SMAD3,PRKCD,SUMO1,TRIM28,SPIDR,APPL1,UBE2J1,CENPQ,TMEM30A,ZFAND1,MICALL2,CEP290
15_Member	GO Biological Processes	GO:1903829	positive regulation of cellular protein localization	-2.37178	-0.660219	9/276	784,3265,3799,4035,4088,5580,10155,55166,79778	CACNB3,HRAS,KIF5B,LRP1,SMAD3,PRKCD,TRIM28,CENPQ,MICALL2
15_Member	GO Biological Processes	GO:1990778	protein localization to cell periphery	-2.30866	-0.615212	10/335	20,784,3265,3799,4035,8548,23513,26060,51130,55327	ABCA2,CACNB3,HRAS,KIF5B,LRP1,BLZF1,SCRIB,APPL1,ASB3,LIN7C
16_Summary	GO Biological Processes	GO:0007264	small GTPase mediated signal transduction	-4.72824	-2.19751	18/503	408,1026,3265,4650,4893,5900,6478,7410,8036,8567,8844,10155,11188,50861,55288,57826,89941,116985,6497,8089,8379,51701	ARRB1,CDKN1A,HRAS,MYO9B,NRAS,RALGDS,SIAH2,VAV2,SHOC2,MADD,KSR1,TRIM28,NISCH,STMN3,RHOT1,RAP2C,RHOT2,ARAP1,SKI,YEATS4,MAD1L1,NLK
16_Member	GO Biological Processes	GO:0007264	small GTPase mediated signal transduction	-4.72824	-2.19751	18/503	408,1026,3265,4650,4893,5900,6478,7410,8036,8567,8844,10155,11188,50861,55288,57826,89941,116985	ARRB1,CDKN1A,HRAS,MYO9B,NRAS,RALGDS,SIAH2,VAV2,SHOC2,MADD,KSR1,TRIM28,NISCH,STMN3,RHOT1,RAP2C,RHOT2,ARAP1
16_Member	Canonical Pathways	M195	PID CMYB PATHWAY	-4.59731	-1.87987	8/84	1026,3265,4893,6497,8089,8379,10155,51701	CDKN1A,HRAS,NRAS,SKI,YEATS4,MAD1L1,TRIM28,NLK
16_Member	GO Biological Processes	GO:0007265	Ras protein signal transduction	-3.30889	-1.29238	12/338	408,1026,3265,4650,4893,8036,8567,8844,10155,11188,50861,57826	ARRB1,CDKN1A,HRAS,MYO9B,NRAS,SHOC2,MADD,KSR1,TRIM28,NISCH,STMN3,RAP2C
17_Summary	WikiPathways	WP4753	Nucleotide excision repair	-4.46475	-1.82813	6/44	2966,4331,5983,7508,10714,728340,7398,10111,11201,6917,7341,301,56652,6880,1386	GTF2H2,MNAT1,RFC3,XPC,POLD3,GTF2H2C,USP1,RAD50,POLI,TCEA1,SUMO1,ANXA1,TWNK,TAF9,ATF2
17_Member	WikiPathways	WP4753	Nucleotide excision repair	-4.46475	-1.82813	6/44	2966,4331,5983,7508,10714,728340	GTF2H2,MNAT1,RFC3,XPC,POLD3,GTF2H2C
17_Member	KEGG Pathway	ko03420	Nucleotide excision repair	-4.29809	-1.73687	6/47	2966,4331,5983,7508,10714,728340	GTF2H2,MNAT1,RFC3,XPC,POLD3,GTF2H2C
17_Member	WikiPathways	WP4946	DNA repair pathways, full network	-4.24044	-1.73687	9/121	2966,4331,5983,7398,7508,10111,10714,11201,728340	GTF2H2,MNAT1,RFC3,USP1,XPC,RAD50,POLD3,POLI,GTF2H2C
17_Member	KEGG Pathway	hsa03420	Nucleotide excision repair	-4.04606	-1.60424	6/52	2966,4331,5983,7508,10714,728340	GTF2H2,MNAT1,RFC3,XPC,POLD3,GTF2H2C
17_Member	WikiPathways	WP5114	Nucleotide excision repair in xeroderma pigmentosum	-3.13852	-1.01577	6/76	2966,4331,5983,7508,10714,728340	GTF2H2,MNAT1,RFC3,XPC,POLD3,GTF2H2C
17_Member	Reactome Gene Sets	R-HSA-5696398	Nucleotide Excision Repair	-2.98858	-0.929254	7/111	2966,4331,5983,6917,7341,7508,10714	GTF2H2,MNAT1,RFC3,TCEA1,SUMO1,XPC,POLD3
17_Member	GO Biological Processes	GO:0032508	DNA duplex unwinding	-2.91012	-0.901409	6/84	301,2966,4331,5983,10111,56652	ANXA1,GTF2H2,MNAT1,RFC3,RAD50,TWNK
17_Member	Reactome Gene Sets	R-HSA-5696399	Global Genome Nucleotide Excision Repair (GG-NER)	-2.91012	-0.901409	6/84	2966,4331,5983,7341,7508,10714	GTF2H2,MNAT1,RFC3,SUMO1,XPC,POLD3
17_Member	WikiPathways	WP405	Eukaryotic transcription initiation	-2.90157	-1.00157	4/42	2966,4331,6880,728340	GTF2H2,MNAT1,TAF9,GTF2H2C
17_Member	KEGG Pathway	ko03022	Basal transcription factors	-2.78882	-0.932823	4/45	2966,4331,6880,728340	GTF2H2,MNAT1,TAF9,GTF2H2C
17_Member	GO Biological Processes	GO:0032392	DNA geometric change	-2.7556	-0.81056	6/90	301,2966,4331,5983,10111,56652	ANXA1,GTF2H2,MNAT1,RFC3,RAD50,TWNK
17_Member	KEGG Pathway	hsa03022	Basal transcription factors	-2.68434	-0.872816	4/48	2966,4331,6880,728340	GTF2H2,MNAT1,TAF9,GTF2H2C
17_Member	Reactome Gene Sets	R-HSA-6796648	TP53 Regulates Transcription of DNA Repair Genes	-2.20749	-0.548163	4/65	1386,2966,4331,6917	ATF2,GTF2H2,MNAT1,TCEA1
17_Member	Reactome Gene Sets	R-HSA-167172	Transcription of the HIV genome	-2.03158	-0.427323	4/73	2966,4331,6880,6917	GTF2H2,MNAT1,TAF9,TCEA1
18_Summary	GO Biological Processes	GO:0001889	liver development	-4.34069	-1.95857	9/147	1054,1386,3265,4088,6670,7494,55959,64841,87178,307,408,3566,4035,4089,5495,8764,9111,11334,23513,26060,51465,192683,59,7059,11173,51222,85301,202018	CEBPG,ATF2,HRAS,SMAD3,SP3,XBP1,SULF2,GNPNAT1,PNPT1,ANXA4,ARRB1,IL4R,LRP1,SMAD4,PPM1B,TNFRSF14,NMI,TUSC2,SCRIB,APPL1,UBE2J1,SCAMP5,ACTA2,THBS3,ADAMTS7,ZNF219,COL27A1,TAPT1
18_Member	GO Biological Processes	GO:0001889	liver development	-4.34069	-1.95857	9/147	1054,1386,3265,4088,6670,7494,55959,64841,87178	CEBPG,ATF2,HRAS,SMAD3,SP3,XBP1,SULF2,GNPNAT1,PNPT1
18_Member	GO Biological Processes	GO:0061008	hepaticobiliary system development	-4.27226	-1.9284	9/150	1054,1386,3265,4088,6670,7494,55959,64841,87178	CEBPG,ATF2,HRAS,SMAD3,SP3,XBP1,SULF2,GNPNAT1,PNPT1
18_Member	GO Biological Processes	GO:0001817	regulation of cytokine production	-2.71546	-0.894888	19/799	307,408,1054,1386,3265,3566,4035,4088,4089,5495,7494,8764,9111,11334,23513,26060,51465,55959,192683	ANXA4,ARRB1,CEBPG,ATF2,HRAS,IL4R,LRP1,SMAD3,SMAD4,PPM1B,XBP1,TNFRSF14,NMI,TUSC2,SCRIB,APPL1,UBE2J1,SULF2,SCAMP5
18_Member	GO Biological Processes	GO:0001819	positive regulation of cytokine production	-2.57216	-0.801592	13/468	1054,1386,3265,3566,4035,4088,7494,8764,11334,23513,26060,55959,192683	CEBPG,ATF2,HRAS,IL4R,LRP1,SMAD3,XBP1,TNFRSF14,TUSC2,SCRIB,APPL1,SULF2,SCAMP5
18_Member	GO Biological Processes	GO:0061448	connective tissue development	-2.4584	-0.612053	10/254	59,1386,4088,7059,7494,11173,51222,55959,85301,202018	ACTA2,ATF2,SMAD3,THBS3,XBP1,ADAMTS7,ZNF219,SULF2,COL27A1,TAPT1
19_Summary	GO Biological Processes	GO:0043414	macromolecule methylation	-4.28547	-1.73687	15/317	648,3006,4089,5870,7832,8493,9463,9646,9739,10155,10196,54482,63899,196074,399818,1312	BMI1,H1-2,SMAD4,RAB6A,BTG2,PPM1D,PICK1,CTR9,SETD1A,TRIM28,PRMT3,TRMT13,NSUN3,METTL15,EEF1AKMT2,COMT
19_Member	GO Biological Processes	GO:0043414	macromolecule methylation	-4.28547	-1.73687	15/317	648,3006,4089,5870,7832,8493,9463,9646,9739,10155,10196,54482,63899,196074,399818	BMI1,H1-2,SMAD4,RAB6A,BTG2,PPM1D,PICK1,CTR9,SETD1A,TRIM28,PRMT3,TRMT13,NSUN3,METTL15,EEF1AKMT2
19_Member	GO Biological Processes	GO:0032259	methylation	-4.13809	-1.67482	16/365	648,1312,3006,4089,5870,7832,8493,9463,9646,9739,10155,10196,54482,63899,196074,399818	BMI1,COMT,H1-2,SMAD4,RAB6A,BTG2,PPM1D,PICK1,CTR9,SETD1A,TRIM28,PRMT3,TRMT13,NSUN3,METTL15,EEF1AKMT2
19_Member	GO Biological Processes	GO:0006479	protein methylation	-2.34707	-0.54248	8/182	3006,4089,5870,7832,9646,9739,10196,399818	H1-2,SMAD4,RAB6A,BTG2,CTR9,SETD1A,PRMT3,EEF1AKMT2
19_Member	GO Biological Processes	GO:0008213	protein alkylation	-2.34707	-0.54248	8/182	3006,4089,5870,7832,9646,9739,10196,399818	H1-2,SMAD4,RAB6A,BTG2,CTR9,SETD1A,PRMT3,EEF1AKMT2
20_Summary	GO Biological Processes	GO:1990928	response to amino acid starvation	-4.1937	-1.70203	6/49	1026,1978,27244,79726,83939,144577,1312,7494,8493,9463,84335,126282,261726,784,51022	CDKN1A,EIF4EBP1,SESN1,WDR59,EIF2A,KICS2,COMT,XBP1,PPM1D,PICK1,AKT1S1,TNFAIP8L1,TIPRL,CACNB3,GLRX2
20_Member	GO Biological Processes	GO:1990928	response to amino acid starvation	-4.1937	-1.70203	6/49	1026,1978,27244,79726,83939,144577	CDKN1A,EIF4EBP1,SESN1,WDR59,EIF2A,KICS2
20_Member	GO Biological Processes	GO:0042594	response to starvation	-3.27946	-1.10609	10/197	1026,1312,1978,7494,8493,9463,27244,79726,83939,144577	CDKN1A,COMT,EIF4EBP1,XBP1,PPM1D,PICK1,SESN1,WDR59,EIF2A,KICS2
20_Member	GO Biological Processes	GO:0031929	TOR signaling	-2.67105	-0.75263	7/126	1978,27244,79726,84335,126282,144577,261726	EIF4EBP1,SESN1,WDR59,AKT1S1,TNFAIP8L1,KICS2,TIPRL
20_Member	GO Biological Processes	GO:0031668	cellular response to extracellular stimulus	-2.55722	-0.687682	10/246	784,1026,1312,7494,8493,9463,27244,51022,79726,144577	CACNB3,CDKN1A,COMT,XBP1,PPM1D,PICK1,SESN1,GLRX2,WDR59,KICS2
20_Member	GO Biological Processes	GO:0031669	cellular response to nutrient levels	-2.43622	-0.599069	9/215	784,1026,1312,7494,8493,9463,27244,79726,144577	CACNB3,CDKN1A,COMT,XBP1,PPM1D,PICK1,SESN1,WDR59,KICS2

## Sheet: Enrichment_Upregulated
GroupID	Category	Term	Description	LogP	Log(q-value)	InTerm_InList	Genes	Symbols
1_Summary	WikiPathways	WP4286	Genotoxicity pathway	-9.04967	-4.70299	8/63	59,1026,7832,8493,9538,10346,51768,196513,3566	ACTA2,CDKN1A,BTG2,PPM1D,EI24,TRIM22,TM7SF3,DCP1B,IL4R
1_Member	WikiPathways	WP4286	Genotoxicity pathway	-9.04967	-4.70299	8/63	59,1026,7832,8493,9538,10346,51768,196513	ACTA2,CDKN1A,BTG2,PPM1D,EI24,TRIM22,TM7SF3,DCP1B
1_Member	Canonical Pathways	M19	PID P73PATHWAY	-2.15049	-0.217055	3/79	1026,3566,196513	CDKN1A,IL4R,DCP1B
2_Summary	KEGG Pathway	hsa04072	Phospholipase D signaling pathway	-7.25654	-3.2891	9/148	112,1606,1759,3265,5900,6464,8525,10554,23396,219,9463,5580,1026,4088,5119,7410,23513,113026,9054,53354,55191,26523,3140,4035,11334	ADCY6,DGKA,DNM1,HRAS,RALGDS,SHC1,DGKZ,AGPAT1,PIP5K1C,ALDH1B1,PICK1,PRKCD,CDKN1A,SMAD3,CHMP1A,VAV2,SCRIB,PLCD3,NFS1,PANK1,NADSYN1,AGO1,MR1,LRP1,TUSC2
2_Member	KEGG Pathway	hsa04072	Phospholipase D signaling pathway	-7.25654	-3.2891	9/148	112,1606,1759,3265,5900,6464,8525,10554,23396	ADCY6,DGKA,DNM1,HRAS,RALGDS,SHC1,DGKZ,AGPAT1,PIP5K1C
2_Member	KEGG Pathway	hsa05231	Choline metabolism in cancer	-3.89237	-0.943628	5/98	1606,3265,5900,8525,23396	DGKA,HRAS,RALGDS,DGKZ,PIP5K1C
2_Member	KEGG Pathway	hsa00561	Glycerolipid metabolism	-3.62279	-0.855887	4/61	219,1606,8525,10554	ALDH1B1,DGKA,DGKZ,AGPAT1
2_Member	GO Biological Processes	GO:0007205	protein kinase C-activating G protein-coupled receptor signaling pathway	-3.50132	-0.798084	3/27	1606,8525,9463	DGKA,DGKZ,PICK1
2_Member	Reactome Gene Sets	R-HSA-114508	Effects of PIP2 hydrolysis	-3.50132	-0.798084	3/27	1606,5580,8525	DGKA,PRKCD,DGKZ
2_Member	GO Biological Processes	GO:0006654	phosphatidic acid biosynthetic process	-3.2798	-0.70459	3/32	1606,8525,10554	DGKA,DGKZ,AGPAT1
2_Member	GO Biological Processes	GO:0046473	phosphatidic acid metabolic process	-3.12785	-0.643383	3/36	1606,8525,10554	DGKA,DGKZ,AGPAT1
2_Member	GO Biological Processes	GO:0042060	wound healing	-2.91597	-0.563066	7/326	1026,1606,4088,5119,7410,8525,23513	CDKN1A,DGKA,SMAD3,CHMP1A,VAV2,DGKZ,SCRIB
2_Member	KEGG Pathway	hsa04070	Phosphatidylinositol signaling system	-2.86019	-0.550404	4/97	1606,8525,23396,113026	DGKA,DGKZ,PIP5K1C,PLCD3
2_Member	GO Biological Processes	GO:0090407	organophosphate biosynthetic process	-2.52234	-0.385073	8/488	112,1606,8525,9054,10554,23396,53354,55191	ADCY6,DGKA,DGKZ,NFS1,AGPAT1,PIP5K1C,PANK1,NADSYN1
2_Member	WikiPathways	WP5072	Modulators of TCR signaling and T cell activation	-2.4644	-0.358266	3/61	1606,8525,26523	DGKA,DGKZ,AGO1
2_Member	GO Biological Processes	GO:0001775	cell activation	-2.35395	-0.308204	9/636	1606,3140,4035,4088,5580,7410,8525,11334,23513	DGKA,MR1,LRP1,SMAD3,PRKCD,VAV2,DGKZ,TUSC2,SCRIB
2_Member	GO Biological Processes	GO:0009611	response to wounding	-2.25026	-0.247374	7/430	1026,1606,4088,5119,7410,8525,23513	CDKN1A,DGKA,SMAD3,CHMP1A,VAV2,DGKZ,SCRIB
3_Summary	WikiPathways	WP4963	p53 transcriptional gene network	-7.15866	-3.2891	7/72	1026,2517,7508,7832,27244,55332,94241,2232,55240,5875,9997,26523,5580,3265,8493,26233,92840	CDKN1A,FUCA1,XPC,BTG2,SESN1,DRAM1,TP53INP1,FDXR,STEAP3,RABGGTA,SCO2,AGO1,PRKCD,HRAS,PPM1D,FBXL6,REEP6
3_Member	WikiPathways	WP4963	p53 transcriptional gene network	-7.15866	-3.2891	7/72	1026,2517,7508,7832,27244,55332,94241	CDKN1A,FUCA1,XPC,BTG2,SESN1,DRAM1,TP53INP1
3_Member	Canonical Pathways	M145	PID P53 DOWNSTREAM PATHWAY	-4.20158	-1.05902	6/137	1026,2232,7832,27244,55240,94241	CDKN1A,FDXR,BTG2,SESN1,STEAP3,TP53INP1
3_Member	Reactome Gene Sets	R-HSA-3700989	Transcriptional Regulation by TP53	-3.32072	-0.714394	8/365	1026,5875,7832,9997,26523,27244,55240,94241	CDKN1A,RABGGTA,BTG2,SCO2,AGO1,SESN1,STEAP3,TP53INP1
3_Member	GO Biological Processes	GO:0034644	cellular response to UV	-3.01731	-0.585887	4/88	1026,5580,7508,94241	CDKN1A,PRKCD,XPC,TP53INP1
3_Member	Reactome Gene Sets	R-HSA-5633008	TP53 Regulates Transcription of Cell Death Genes	-2.87205	-0.550666	3/44	5875,55240,94241	RABGGTA,STEAP3,TP53INP1
3_Member	GO Biological Processes	GO:0009314	response to radiation	-2.85581	-0.550404	8/431	1026,3265,5580,7508,8493,26233,92840,94241	CDKN1A,HRAS,PRKCD,XPC,PPM1D,FBXL6,REEP6,TP53INP1
3_Member	GO Biological Processes	GO:0071478	cellular response to radiation	-2.72327	-0.488347	5/177	1026,3265,5580,7508,94241	CDKN1A,HRAS,PRKCD,XPC,TP53INP1
3_Member	GO Biological Processes	GO:0071482	cellular response to light stimulus	-2.61743	-0.429838	4/113	1026,5580,7508,94241	CDKN1A,PRKCD,XPC,TP53INP1
3_Member	Canonical Pathways	M256	PID TAP63 PATHWAY	-2.61516	-0.429838	3/54	1026,2232,5580	CDKN1A,FDXR,PRKCD
3_Member	GO Biological Processes	GO:0009416	response to light stimulus	-2.38883	-0.311683	6/304	1026,5580,7508,26233,92840,94241	CDKN1A,PRKCD,XPC,FBXL6,REEP6,TP53INP1
3_Member	GO Biological Processes	GO:0009411	response to UV	-2.22117	-0.239976	4/146	1026,5580,7508,94241	CDKN1A,PRKCD,XPC,TP53INP1
4_Summary	Canonical Pathways	M186	PID PDGFRB PATHWAY	-6.5736	-2.82897	8/129	59,3265,4035,5580,6464,7410,8844,116985,1759,3985,5900,112,408,1287,23396,1026,1291,85301,1606,8525,8567,10174,85363,9463,10383,84552,84335,84619,26523,8379	ACTA2,HRAS,LRP1,PRKCD,SHC1,VAV2,KSR1,ARAP1,DNM1,LIMK2,RALGDS,ADCY6,ARRB1,COL4A5,PIP5K1C,CDKN1A,COL6A1,COL27A1,DGKA,DGKZ,MADD,SORBS3,TRIM5,PICK1,TUBB4B,PARD6G,AKT1S1,ZGPAT,AGO1,MAD1L1
4_Member	Canonical Pathways	M186	PID PDGFRB PATHWAY	-6.5736	-2.82897	8/129	59,3265,4035,5580,6464,7410,8844,116985	ACTA2,HRAS,LRP1,PRKCD,SHC1,VAV2,KSR1,ARAP1
4_Member	WikiPathways	WP437	EGF/EGFR signaling pathway	-4.76293	-1.19439	7/163	1759,3265,3985,5580,5900,6464,7410	DNM1,HRAS,LIMK2,PRKCD,RALGDS,SHC1,VAV2
4_Member	KEGG Pathway	hsa04926	Relaxin signaling pathway	-4.34738	-1.11464	6/129	59,112,408,1287,3265,6464	ACTA2,ADCY6,ARRB1,COL4A5,HRAS,SHC1
4_Member	Reactome Gene Sets	R-HSA-167044	Signalling to RAS	-3.89955	-0.943628	3/20	3265,5900,6464	HRAS,RALGDS,SHC1
4_Member	WikiPathways	WP23	B cell receptor signaling pathway	-3.89237	-0.943628	5/98	3265,5580,6464,7410,23396	HRAS,PRKCD,SHC1,VAV2,PIP5K1C
4_Member	Reactome Gene Sets	R-HSA-1250196	SHC1 events in ERBB2 signaling	-3.77207	-0.896184	3/22	3265,5580,6464	HRAS,PRKCD,SHC1
4_Member	WikiPathways	WP3929	Chemokine signaling pathway	-3.75773	-0.896184	6/165	112,408,3265,5580,6464,7410	ADCY6,ARRB1,HRAS,PRKCD,SHC1,VAV2
4_Member	Canonical Pathways	M164	PID ERBB1 DOWNSTREAM PATHWAY	-3.75151	-0.896184	5/105	3265,5580,5900,7410,8844	HRAS,PRKCD,RALGDS,VAV2,KSR1
4_Member	Canonical Pathways	M17200	SA B CELL RECEPTOR COMPLEXES	-3.65652	-0.87804	3/24	3265,6464,7410	HRAS,SHC1,VAV2
4_Member	WikiPathways	WP4659	Gastrin signaling pathway	-3.58498	-0.840358	5/114	408,1026,3265,5580,6464	ARRB1,CDKN1A,HRAS,PRKCD,SHC1
4_Member	Canonical Pathways	M125	PID IGF1 PATHWAY	-3.40781	-0.747836	3/29	3265,5580,6464	HRAS,PRKCD,SHC1
4_Member	KEGG Pathway	hsa04062	Chemokine signaling pathway	-3.40433	-0.747836	6/192	112,408,3265,5580,6464,7410	ADCY6,ARRB1,HRAS,PRKCD,SHC1,VAV2
4_Member	Reactome Gene Sets	R-HSA-2424491	DAP12 signaling	-3.36362	-0.741213	3/30	3265,6464,7410	HRAS,SHC1,VAV2
4_Member	KEGG Pathway	hsa04510	Focal adhesion	-3.29911	-0.70459	6/201	1287,1291,3265,6464,7410,23396	COL4A5,COL6A1,HRAS,SHC1,VAV2,PIP5K1C
4_Member	Reactome Gene Sets	R-HSA-2871796	FCERI mediated MAPK activation	-3.2798	-0.70459	3/32	3265,6464,7410	HRAS,SHC1,VAV2
4_Member	Canonical Pathways	M233	PID EPO PATHWAY	-3.23998	-0.692631	3/33	3265,6464,7410	HRAS,SHC1,VAV2
4_Member	Reactome Gene Sets	R-HSA-187687	Signalling to ERKs	-3.20143	-0.667654	3/34	3265,5900,6464	HRAS,RALGDS,SHC1
4_Member	Canonical Pathways	M127	PID ERBB1 RECEPTOR PROXIMAL PATHWAY	-3.16407	-0.649897	3/35	3265,6464,23396	HRAS,SHC1,PIP5K1C
4_Member	WikiPathways	WP244	Alpha 6 beta 4 signaling pathway	-3.16407	-0.649897	3/35	3265,5580,6464	HRAS,PRKCD,SHC1
4_Member	Canonical Pathways	M271	PID PI3K PLC TRK PATHWAY	-3.12785	-0.643383	3/36	3265,5580,6464	HRAS,PRKCD,SHC1
4_Member	Reactome Gene Sets	R-HSA-6802948	Signaling by high-kinase activity BRAF mutants	-3.12785	-0.643383	3/36	408,3265,8844	ARRB1,HRAS,KSR1
4_Member	WikiPathways	WP2380	Brain-derived neurotrophic factor (BDNF) signaling pathway	-3.12084	-0.643383	5/144	3265,5580,6464,7410,8844	HRAS,PRKCD,SHC1,VAV2,KSR1
4_Member	Canonical Pathways	M62	PID EPHB FWD PATHWAY	-2.99305	-0.585887	3/40	1759,3265,6464	DNM1,HRAS,SHC1
4_Member	Reactome Gene Sets	R-HSA-5674135	MAP2K and MAPK activation	-2.99305	-0.585887	3/40	408,3265,8844	ARRB1,HRAS,KSR1
4_Member	WikiPathways	WP2526	PDGF pathway	-2.99305	-0.585887	3/40	3265,6464,7410	HRAS,SHC1,VAV2
4_Member	WikiPathways	WP4871	Kisspeptin/kisspeptin receptor system in the ovary	-2.99305	-0.585887	3/40	408,3265,5580	ARRB1,HRAS,PRKCD
4_Member	Canonical Pathways	M214	PID ERBB1 INTERNALIZATION PATHWAY	-2.96162	-0.569174	3/41	1759,3265,6464	DNM1,HRAS,SHC1
4_Member	Reactome Gene Sets	R-HSA-9006934	Signaling by Receptor Tyrosine Kinases	-2.93293	-0.563066	9/521	1287,1291,1759,3265,5580,5900,6464,7410,85301	COL4A5,COL6A1,DNM1,HRAS,PRKCD,RALGDS,SHC1,VAV2,COL27A1
4_Member	Canonical Pathways	M222	PID CXCR3 PATHWAY	-2.90115	-0.563066	3/43	408,1759,3265	ARRB1,DNM1,HRAS
4_Member	Reactome Gene Sets	R-HSA-9656223	Signaling by RAF1 mutants	-2.90115	-0.563066	3/43	408,3265,8844	ARRB1,HRAS,KSR1
4_Member	Reactome Gene Sets	R-HSA-2172127	DAP12 interactions	-2.84365	-0.546178	3/45	3265,6464,7410	HRAS,SHC1,VAV2
4_Member	Reactome Gene Sets	R-HSA-6802946	Signaling by moderate kinase activity BRAF mutants	-2.78884	-0.52851	3/47	408,3265,8844	ARRB1,HRAS,KSR1
4_Member	Reactome Gene Sets	R-HSA-6802949	Signaling by RAS mutants	-2.78884	-0.52851	3/47	408,3265,8844	ARRB1,HRAS,KSR1
4_Member	Reactome Gene Sets	R-HSA-6802955	Paradoxical activation of RAF signaling by kinase inactive BRAF	-2.78884	-0.52851	3/47	408,3265,8844	ARRB1,HRAS,KSR1
4_Member	Reactome Gene Sets	R-HSA-9649948	Signaling downstream of RAS mutants	-2.78884	-0.52851	3/47	408,3265,8844	ARRB1,HRAS,KSR1
4_Member	GO Biological Processes	GO:0090398	cellular senescence	-2.76237	-0.511718	3/48	1026,3265,5580	CDKN1A,HRAS,PRKCD
4_Member	Reactome Gene Sets	R-HSA-1227986	Signaling by ERBB2	-2.71118	-0.488347	3/50	3265,5580,6464	HRAS,PRKCD,SHC1
4_Member	Reactome Gene Sets	R-HSA-76002	Platelet activation, signaling and aggregation	-2.69867	-0.482742	6/263	408,1606,5580,6464,7410,8525	ARRB1,DGKA,PRKCD,SHC1,VAV2,DGKZ
4_Member	Reactome Gene Sets	R-HSA-187037	Signaling by NTRK1 (TRKA)	-2.58983	-0.422041	4/115	1759,3265,5900,6464	DNM1,HRAS,RALGDS,SHC1
4_Member	GO Biological Processes	GO:0043410	positive regulation of MAPK cascade	-2.51158	-0.379741	8/490	59,408,3265,6464,8567,8844,10174,85363	ACTA2,ARRB1,HRAS,SHC1,MADD,KSR1,SORBS3,TRIM5
4_Member	Canonical Pathways	M187	PID TRKR PATHWAY	-2.4644	-0.358266	3/61	1759,3265,6464	DNM1,HRAS,SHC1
4_Member	Canonical Pathways	M10	PID BCR 5PATHWAY	-2.42479	-0.339517	3/63	3265,6464,7410	HRAS,SHC1,VAV2
4_Member	Canonical Pathways	M8	PID ENDOTHELIN PATHWAY	-2.42479	-0.339517	3/63	112,3265,5580	ADCY6,HRAS,PRKCD
4_Member	Reactome Gene Sets	R-HSA-109582	Hemostasis	-2.42101	-0.339142	9/621	408,1606,3265,5580,6464,7410,8525,9463,10383	ARRB1,DGKA,HRAS,PRKCD,SHC1,VAV2,DGKZ,PICK1,TUBB4B
4_Member	KEGG Pathway	hsa04015	Rap1 signaling pathway	-2.40414	-0.324622	5/210	112,3265,5900,7410,84552	ADCY6,HRAS,RALGDS,VAV2,PARD6G
4_Member	Canonical Pathways	M15	PID LYSOPHOSPHOLIPID PATHWAY	-2.38653	-0.311683	3/65	112,3265,5580	ADCY6,HRAS,PRKCD
4_Member	WikiPathways	WP2374	Oncostatin M signaling pathway	-2.36788	-0.308204	3/66	3265,5580,6464	HRAS,PRKCD,SHC1
4_Member	Reactome Gene Sets	R-HSA-166520	Signaling by NTRKs	-2.35213	-0.308204	4/134	1759,3265,5900,6464	DNM1,HRAS,RALGDS,SHC1
4_Member	Reactome Gene Sets	R-HSA-6802952	Signaling by BRAF and RAF1 fusions	-2.34954	-0.308204	3/67	408,3265,8844	ARRB1,HRAS,KSR1
4_Member	GO Biological Processes	GO:0043549	regulation of kinase activity	-2.32843	-0.29877	10/763	1026,3265,5580,6464,7410,8525,8567,8844,84335,84619	CDKN1A,HRAS,PRKCD,SHC1,VAV2,DGKZ,MADD,KSR1,AKT1S1,ZGPAT
4_Member	KEGG Pathway	hsa04915	Estrogen signaling pathway	-2.30702	-0.283743	4/138	112,3265,5580,6464	ADCY6,HRAS,PRKCD,SHC1
4_Member	Reactome Gene Sets	R-HSA-5683057	MAPK family signaling cascades	-2.24967	-0.247374	6/325	408,3265,5900,6464,8844,26523	ARRB1,HRAS,RALGDS,SHC1,KSR1,AGO1
4_Member	WikiPathways	WP2037	Prolactin signaling pathway	-2.19694	-0.235863	3/76	3265,6464,7410	HRAS,SHC1,VAV2
4_Member	WikiPathways	WP5087	Malignant pleural mesothelioma	-2.16135	-0.217055	7/447	59,1026,1287,3265,6464,8379,84335	ACTA2,CDKN1A,COL4A5,HRAS,SHC1,MAD1L1,AKT1S1
4_Member	GO Biological Processes	GO:0007569	cell aging	-2.15049	-0.217055	3/79	1026,3265,5580	CDKN1A,HRAS,PRKCD
4_Member	Canonical Pathways	M48	PID MET PATHWAY	-2.15049	-0.217055	3/79	3265,6464,84335	HRAS,SHC1,AKT1S1
4_Member	Reactome Gene Sets	R-HSA-6806834	Signaling by MET	-2.15049	-0.217055	3/79	3265,6464,85301	HRAS,SHC1,COL27A1
4_Member	GO Biological Processes	GO:0043408	regulation of MAPK cascade	-2.14566	-0.215565	9/686	59,408,3265,5580,6464,8567,8844,10174,85363	ACTA2,ARRB1,HRAS,PRKCD,SHC1,MADD,KSR1,SORBS3,TRIM5
4_Member	WikiPathways	WP2261	Glioblastoma signaling pathways	-2.09152	-0.177806	3/83	1026,3265,5580	CDKN1A,HRAS,PRKCD
4_Member	Reactome Gene Sets	R-HSA-6802957	Oncogenic MAPK signaling	-2.07728	-0.168342	3/84	408,3265,8844	ARRB1,HRAS,KSR1
5_Summary	GO Biological Processes	GO:0007264	small GTPase mediated signal transduction	-5.19651	-1.5488	9/261	1026,3265,4650,5900,7410,8844,10155,11188,89941,6497,8379,8824	CDKN1A,HRAS,MYO9B,RALGDS,VAV2,KSR1,TRIM28,NISCH,RHOT2,SKI,MAD1L1,CES2
5_Member	GO Biological Processes	GO:0007264	small GTPase mediated signal transduction	-5.19651	-1.5488	9/261	1026,3265,4650,5900,7410,8844,10155,11188,89941	CDKN1A,HRAS,MYO9B,RALGDS,VAV2,KSR1,TRIM28,NISCH,RHOT2
5_Member	GO Biological Processes	GO:0007265	Ras protein signal transduction	-4.36595	-1.11464	7/188	1026,3265,4650,5900,8844,10155,11188	CDKN1A,HRAS,MYO9B,RALGDS,KSR1,TRIM28,NISCH
5_Member	Canonical Pathways	M195	PID CMYB PATHWAY	-4.21073	-1.05902	5/84	1026,3265,6497,8379,10155	CDKN1A,HRAS,SKI,MAD1L1,TRIM28
5_Member	Canonical Pathways	M40	PID E2F PATHWAY	-2.24548	-0.245675	3/73	1026,8824,10155	CDKN1A,CES2,TRIM28
6_Summary	Reactome Gene Sets	R-HSA-422475	Axon guidance	-4.69451	-1.19292	12/552	784,1287,1291,1759,3265,3985,4650,6158,6464,7410,10383,23396,10501,54961,84552,5580,79734,116985	CACNB3,COL4A5,COL6A1,DNM1,HRAS,LIMK2,MYO9B,RPL28,SHC1,VAV2,TUBB4B,PIP5K1C,SEMA6B,SSH3,PARD6G,PRKCD,KCTD17,ARAP1
6_Member	Reactome Gene Sets	R-HSA-422475	Axon guidance	-4.69451	-1.19292	12/552	784,1287,1291,1759,3265,3985,4650,6158,6464,7410,10383,23396	CACNB3,COL4A5,COL6A1,DNM1,HRAS,LIMK2,MYO9B,RPL28,SHC1,VAV2,TUBB4B,PIP5K1C
6_Member	Reactome Gene Sets	R-HSA-9675108	Nervous system development	-4.50697	-1.11547	12/577	784,1287,1291,1759,3265,3985,4650,6158,6464,7410,10383,23396	CACNB3,COL4A5,COL6A1,DNM1,HRAS,LIMK2,MYO9B,RPL28,SHC1,VAV2,TUBB4B,PIP5K1C
6_Member	Reactome Gene Sets	R-HSA-2682334	EPH-Ephrin signaling	-2.94537	-0.563066	4/92	1759,3265,3985,7410	DNM1,HRAS,LIMK2,VAV2
6_Member	KEGG Pathway	hsa04360	Axon guidance	-2.67059	-0.470033	5/182	3265,3985,10501,54961,84552	HRAS,LIMK2,SEMA6B,SSH3,PARD6G
6_Member	GO Biological Processes	GO:0120032	regulation of plasma membrane bounded cell projection assembly	-2.54124	-0.385073	5/195	3265,3985,5580,79734,116985	HRAS,LIMK2,PRKCD,KCTD17,ARAP1
6_Member	GO Biological Processes	GO:0060491	regulation of cell projection assembly	-2.52224	-0.385073	5/197	3265,3985,5580,79734,116985	HRAS,LIMK2,PRKCD,KCTD17,ARAP1
6_Member	KEGG Pathway	hsa04810	Regulation of actin cytoskeleton	-2.33573	-0.29877	5/218	3265,3985,7410,23396,54961	HRAS,LIMK2,VAV2,PIP5K1C,SSH3
6_Member	Canonical Pathways	M81	PID CDC42 PATHWAY	-2.29628	-0.283743	3/70	3265,3985,7410	HRAS,LIMK2,VAV2
7_Summary	KEGG Pathway	hsa04115	p53 signaling pathway	-4.50472	-1.11547	5/73	1026,8493,9538,27244,55240,9463,79726,84335,126282	CDKN1A,PPM1D,EI24,SESN1,STEAP3,PICK1,WDR59,AKT1S1,TNFAIP8L1
7_Member	KEGG Pathway	hsa04115	p53 signaling pathway	-4.50472	-1.11547	5/73	1026,8493,9538,27244,55240	CDKN1A,PPM1D,EI24,SESN1,STEAP3
7_Member	GO Biological Processes	GO:0009267	cellular response to starvation	-2.91625	-0.563066	5/160	1026,8493,9463,27244,79726	CDKN1A,PPM1D,PICK1,SESN1,WDR59
7_Member	GO Biological Processes	GO:0032007	negative regulation of TOR signaling	-2.81592	-0.533691	3/46	27244,84335,126282	SESN1,AKT1S1,TNFAIP8L1
7_Member	GO Biological Processes	GO:0034198	cellular response to amino acid starvation	-2.78884	-0.52851	3/47	1026,27244,79726	CDKN1A,SESN1,WDR59
7_Member	GO Biological Processes	GO:1990928	response to amino acid starvation	-2.73649	-0.497016	3/49	1026,27244,79726	CDKN1A,SESN1,WDR59
7_Member	GO Biological Processes	GO:0032006	regulation of TOR signaling	-2.71855	-0.488347	4/106	27244,79726,84335,126282	SESN1,WDR59,AKT1S1,TNFAIP8L1
7_Member	GO Biological Processes	GO:0042594	response to starvation	-2.53171	-0.385073	5/196	1026,8493,9463,27244,79726	CDKN1A,PPM1D,PICK1,SESN1,WDR59
7_Member	GO Biological Processes	GO:0031669	cellular response to nutrient levels	-2.4485	-0.350587	5/205	1026,8493,9463,27244,79726	CDKN1A,PPM1D,PICK1,SESN1,WDR59
7_Member	GO Biological Processes	GO:0031668	cellular response to extracellular stimulus	-2.18478	-0.230793	5/237	1026,8493,9463,27244,79726	CDKN1A,PPM1D,PICK1,SESN1,WDR59
8_Summary	GO Biological Processes	GO:0051129	negative regulation of cellular component organization	-4.43573	-1.11547	13/684	20,112,1471,2580,3985,4043,5580,8379,9463,10501,54961,116985,192683,59,7410,10723,59342,84335	ABCA2,ADCY6,CST3,GAK,LIMK2,LRPAP1,PRKCD,MAD1L1,PICK1,SEMA6B,SSH3,ARAP1,SCAMP5,ACTA2,VAV2,SLC12A7,SCPEP1,AKT1S1
8_Member	GO Biological Processes	GO:0051129	negative regulation of cellular component organization	-4.43573	-1.11547	13/684	20,112,1471,2580,3985,4043,5580,8379,9463,10501,54961,116985,192683	ABCA2,ADCY6,CST3,GAK,LIMK2,LRPAP1,PRKCD,MAD1L1,PICK1,SEMA6B,SSH3,ARAP1,SCAMP5
8_Member	GO Biological Processes	GO:0090066	regulation of anatomical structure size	-3.13775	-0.643383	9/487	59,112,5580,7410,10501,10723,54961,59342,84335	ACTA2,ADCY6,PRKCD,VAV2,SEMA6B,SLC12A7,SSH3,SCPEP1,AKT1S1
8_Member	GO Biological Processes	GO:0031345	negative regulation of cell projection organization	-2.60958	-0.427246	5/188	112,2580,3985,5580,10501	ADCY6,GAK,LIMK2,PRKCD,SEMA6B
8_Member	GO Biological Processes	GO:0032535	regulation of cellular component size	-2.09248	-0.177806	6/351	5580,7410,10501,10723,54961,84335	PRKCD,VAV2,SEMA6B,SLC12A7,SSH3,AKT1S1
9_Summary	KEGG Pathway	hsa04144	Endocytosis	-4.42077	-1.11547	8/252	408,1759,3265,4088,5119,23396,84552,116985,2580,23513,3339,4035,51257,5641,5580	ARRB1,DNM1,HRAS,SMAD3,CHMP1A,PIP5K1C,PARD6G,ARAP1,GAK,SCRIB,HSPG2,LRP1,MARCHF2,LGMN,PRKCD
9_Member	KEGG Pathway	hsa04144	Endocytosis	-4.42077	-1.11547	8/252	408,1759,3265,4088,5119,23396,84552,116985	ARRB1,DNM1,HRAS,SMAD3,CHMP1A,PIP5K1C,PARD6G,ARAP1
9_Member	GO Biological Processes	GO:0048488	synaptic vesicle endocytosis	-3.99434	-0.969878	4/49	1759,2580,23396,23513	DNM1,GAK,PIP5K1C,SCRIB
9_Member	GO Biological Processes	GO:0140238	presynaptic endocytosis	-3.99434	-0.969878	4/49	1759,2580,23396,23513	DNM1,GAK,PIP5K1C,SCRIB
9_Member	GO Biological Processes	GO:0006898	receptor-mediated endocytosis	-3.92116	-0.943628	6/154	408,1759,2580,3339,4035,23396	ARRB1,DNM1,GAK,HSPG2,LRP1,PIP5K1C
9_Member	GO Biological Processes	GO:0036465	synaptic vesicle recycling	-3.7371	-0.895561	4/57	1759,2580,23396,23513	DNM1,GAK,PIP5K1C,SCRIB
9_Member	GO Biological Processes	GO:0006897	endocytosis	-3.12519	-0.643383	9/489	408,1759,2580,3265,3339,4035,23396,23513,51257	ARRB1,DNM1,GAK,HRAS,HSPG2,LRP1,PIP5K1C,SCRIB,MARCHF2
9_Member	GO Biological Processes	GO:0043112	receptor metabolic process	-2.91069	-0.563066	4/94	408,1759,4035,5641	ARRB1,DNM1,LRP1,LGMN
9_Member	Canonical Pathways	M238	PID THROMBIN PAR1 PATHWAY	-2.90115	-0.563066	3/43	408,1759,5580	ARRB1,DNM1,PRKCD
9_Member	GO Biological Processes	GO:0099504	synaptic vesicle cycle	-2.60356	-0.427134	4/114	1759,2580,23396,23513	DNM1,GAK,PIP5K1C,SCRIB
9_Member	GO Biological Processes	GO:0099003	vesicle-mediated transport in synapse	-2.52315	-0.385073	4/120	1759,2580,23396,23513	DNM1,GAK,PIP5K1C,SCRIB
9_Member	GO Biological Processes	GO:0031623	receptor internalization	-2.44442	-0.350587	3/62	408,1759,4035	ARRB1,DNM1,LRP1
9_Member	Reactome Gene Sets	R-HSA-8856828	Clathrin-mediated endocytosis	-2.22117	-0.239976	4/146	408,1759,2580,23396	ARRB1,DNM1,GAK,PIP5K1C
10_Summary	GO Biological Processes	GO:0044790	suppression of viral release by host	-4.20197	-1.05902	3/16	10155,51257,85363,20,4035,5580,7832,10346,27244,94241,196513,59,4088,57169,408,9646,10336,23295,26233,55332,340371	TRIM28,MARCHF2,TRIM5,ABCA2,LRP1,PRKCD,BTG2,TRIM22,SESN1,TP53INP1,DCP1B,ACTA2,SMAD3,ZNFX1,ARRB1,CTR9,PCGF3,MGRN1,FBXL6,DRAM1,NRBP2
10_Member	GO Biological Processes	GO:0044790	suppression of viral release by host	-4.20197	-1.05902	3/16	10155,51257,85363	TRIM28,MARCHF2,TRIM5
10_Member	GO Biological Processes	GO:0031331	positive regulation of cellular catabolic process	-4.1629	-1.04667	10/439	20,4035,5580,7832,10346,27244,51257,85363,94241,196513	ABCA2,LRP1,PRKCD,BTG2,TRIM22,SESN1,MARCHF2,TRIM5,TP53INP1,DCP1B
10_Member	GO Biological Processes	GO:0009896	positive regulation of catabolic process	-3.68207	-0.879446	10/503	20,4035,5580,7832,10346,27244,51257,85363,94241,196513	ABCA2,LRP1,PRKCD,BTG2,TRIM22,SESN1,MARCHF2,TRIM5,TP53INP1,DCP1B
10_Member	GO Biological Processes	GO:0009615	response to virus	-2.79719	-0.52851	7/342	59,4088,10155,10346,51257,57169,85363	ACTA2,SMAD3,TRIM28,TRIM22,MARCHF2,ZNFX1,TRIM5
10_Member	GO Biological Processes	GO:0010508	positive regulation of autophagy	-2.32938	-0.29877	4/136	10346,27244,85363,94241	TRIM22,SESN1,TRIM5,TP53INP1
10_Member	GO Biological Processes	GO:1903900	regulation of viral life cycle	-2.29598	-0.283743	4/139	10155,10346,57169,85363	TRIM28,TRIM22,ZNFX1,TRIM5
10_Member	GO Biological Processes	GO:0016567	protein ubiquitination	-2.20989	-0.237951	9/670	408,9646,10155,10336,10346,23295,26233,51257,85363	ARRB1,CTR9,TRIM28,PCGF3,TRIM22,MGRN1,FBXL6,MARCHF2,TRIM5
10_Member	GO Biological Processes	GO:0051607	defense response to virus	-2.19996	-0.235863	5/235	10155,10346,51257,57169,85363	TRIM28,TRIM22,MARCHF2,ZNFX1,TRIM5
10_Member	GO Biological Processes	GO:0140546	defense response to symbiont	-2.19235	-0.234834	5/236	10155,10346,51257,57169,85363	TRIM28,TRIM22,MARCHF2,ZNFX1,TRIM5
10_Member	GO Biological Processes	GO:0010506	regulation of autophagy	-2.18126	-0.229022	6/336	10346,27244,55332,85363,94241,340371	TRIM22,SESN1,DRAM1,TRIM5,TP53INP1,NRBP2
10_Member	GO Biological Processes	GO:0050792	regulation of viral process	-2.09277	-0.177806	4/159	10155,10346,57169,85363	TRIM28,TRIM22,ZNFX1,TRIM5
10_Member	GO Biological Processes	GO:0032446	protein modification by small protein conjugation	-2.01245	-0.128165	9/721	408,9646,10155,10336,10346,23295,26233,51257,85363	ARRB1,CTR9,TRIM28,PCGF3,TRIM22,MGRN1,FBXL6,MARCHF2,TRIM5
11_Summary	Canonical Pathways	M18895	SA TRKA RECEPTOR	-4.11923	-1.02781	3/17	1026,3265,6464,1287,4088,5580,113026,3985,6497,5900,112,7410,84335,59,8379,408,8844,27244,5818,3339,5641,9538,10501,3566,8764,10346,85363	CDKN1A,HRAS,SHC1,COL4A5,SMAD3,PRKCD,PLCD3,LIMK2,SKI,RALGDS,ADCY6,VAV2,AKT1S1,ACTA2,MAD1L1,ARRB1,KSR1,SESN1,NECTIN1,HSPG2,LGMN,EI24,SEMA6B,IL4R,TNFRSF14,TRIM22,TRIM5
11_Member	Canonical Pathways	M18895	SA TRKA RECEPTOR	-4.11923	-1.02781	3/17	1026,3265,6464	CDKN1A,HRAS,SHC1
11_Member	KEGG Pathway	hsa04933	AGE-RAGE signaling pathway in diabetic complications	-3.85102	-0.935696	5/100	1287,3265,4088,5580,113026	COL4A5,HRAS,SMAD3,PRKCD,PLCD3
11_Member	WikiPathways	WP366	TGF-beta signaling pathway	-3.27716	-0.70459	5/133	1026,3985,4088,6464,6497	CDKN1A,LIMK2,SMAD3,SHC1,SKI
11_Member	KEGG Pathway	hsa05220	Chronic myeloid leukemia	-3.25696	-0.699401	4/76	1026,3265,4088,6464	CDKN1A,HRAS,SMAD3,SHC1
11_Member	KEGG Pathway	hsa05210	Colorectal cancer	-3.05465	-0.595748	4/86	1026,3265,4088,5900	CDKN1A,HRAS,SMAD3,RALGDS
11_Member	WikiPathways	WP4263	Pancreatic adenocarcinoma pathway	-2.99899	-0.585887	4/89	1026,4088,5580,5900	CDKN1A,SMAD3,PRKCD,RALGDS
11_Member	KEGG Pathway	hsa01522	Endocrine resistance	-2.84374	-0.546178	4/98	112,1026,3265,6464	ADCY6,CDKN1A,HRAS,SHC1
11_Member	WikiPathways	WP4535	Envelope proteins and their potential roles in EDMD physiopathology	-2.81592	-0.533691	3/46	112,3265,4088	ADCY6,HRAS,SMAD3
11_Member	WikiPathways	WP3646	Hepatitis C and hepatocellular carcinoma	-2.71118	-0.488347	3/50	1026,4088,7410	CDKN1A,SMAD3,VAV2
11_Member	WikiPathways	WP615	Senescence and autophagy in cancer	-2.68891	-0.482742	4/108	1026,3265,4088,84335	CDKN1A,HRAS,SMAD3,AKT1S1
11_Member	WikiPathways	WP710	DNA damage response (only ATM dependent)	-2.58983	-0.422041	4/115	1026,3265,4088,6464	CDKN1A,HRAS,SMAD3,SHC1
11_Member	WikiPathways	WP560	TGF-beta receptor signaling	-2.52657	-0.385073	3/58	3265,4088,6497	HRAS,SMAD3,SKI
11_Member	WikiPathways	WP4816	TGF-beta receptor signaling in skeletal dysplasias	-2.44442	-0.350587	3/62	3265,4088,6497	HRAS,SMAD3,SKI
11_Member	GO Biological Processes	GO:0061041	regulation of wound healing	-2.36365	-0.308204	4/133	59,3265,4088,5580	ACTA2,HRAS,SMAD3,PRKCD
11_Member	KEGG Pathway	hsa05166	Human T-cell leukemia virus 1 infection	-2.30265	-0.283743	5/222	112,1026,3265,4088,8379	ADCY6,CDKN1A,HRAS,SMAD3,MAD1L1
11_Member	KEGG Pathway	hsa04371	Apelin signaling pathway	-2.29598	-0.283743	4/139	59,112,3265,4088	ACTA2,ADCY6,HRAS,SMAD3
11_Member	Reactome Gene Sets	R-HSA-5663202	Diseases of signal transduction by growth factor receptors and second messengers	-2.23423	-0.242208	7/433	408,1026,3265,4088,6464,8844,84335	ARRB1,CDKN1A,HRAS,SMAD3,SHC1,KSR1,AKT1S1
11_Member	WikiPathways	WP4216	Chromosomal and microsatellite instability in colorectal cancer	-2.22906	-0.242208	3/74	1026,4088,5900	CDKN1A,SMAD3,RALGDS
11_Member	KEGG Pathway	hsa05214	Glioma	-2.21288	-0.237951	3/75	1026,3265,6464	CDKN1A,HRAS,SHC1
11_Member	WikiPathways	WP4674	Head and neck squamous cell carcinoma	-2.19694	-0.235863	3/76	1026,3265,27244	CDKN1A,HRAS,SESN1
11_Member	KEGG Pathway	hsa05212	Pancreatic cancer	-2.19694	-0.235863	3/76	1026,4088,5900	CDKN1A,SMAD3,RALGDS
11_Member	KEGG Pathway	hsa05226	Gastric cancer	-2.19038	-0.234633	4/149	1026,3265,4088,6464	CDKN1A,HRAS,SMAD3,SHC1
11_Member	GO Biological Processes	GO:0002088	lens development in camera-type eye	-2.16575	-0.217055	3/78	4088,5818,6497	SMAD3,NECTIN1,SKI
11_Member	WikiPathways	WP4666	Hepatitis B infection	-2.14065	-0.215565	4/154	1026,3265,3339,4088	CDKN1A,HRAS,HSPG2,SMAD3
11_Member	GO Biological Processes	GO:0045926	negative regulation of growth	-2.12559	-0.202155	5/245	1026,4088,5641,9538,10501	CDKN1A,SMAD3,LGMN,EI24,SEMA6B
11_Member	Canonical Pathways	M2	PID SMAD2 3NUCLEAR PATHWAY	-2.10596	-0.185787	3/82	1026,4088,6497	CDKN1A,SMAD3,SKI
11_Member	KEGG Pathway	hsa05161	Hepatitis B	-2.06489	-0.163693	4/162	1026,3265,3339,4088	CDKN1A,HRAS,HSPG2,SMAD3
11_Member	KEGG Pathway	hsa04012	ErbB signaling pathway	-2.06322	-0.163693	3/85	1026,3265,6464	CDKN1A,HRAS,SHC1
11_Member	WikiPathways	WP4239	Epithelial to mesenchymal transition in colorectal cancer	-2.03761	-0.142766	4/165	1287,3265,4088,6464	COL4A5,HRAS,SMAD3,SHC1
11_Member	Reactome Gene Sets	R-HSA-1280215	Cytokine Signaling in Immune system	-2.03461	-0.142766	9/715	1026,3265,3566,4088,5580,6464,8764,10346,85363	CDKN1A,HRAS,IL4R,SMAD3,PRKCD,SHC1,TNFRSF14,TRIM22,TRIM5
11_Member	GO Biological Processes	GO:1903034	regulation of response to wounding	-2.02865	-0.138334	4/166	59,3265,4088,5580	ACTA2,HRAS,SMAD3,PRKCD
11_Member	KEGG Pathway	hsa05225	Hepatocellular carcinoma	-2.01092	-0.128129	4/168	1026,3265,4088,6464	CDKN1A,HRAS,SMAD3,SHC1
12_Summary	GO Biological Processes	GO:0030100	regulation of endocytosis	-4.08936	-1.02143	7/208	20,408,4035,4043,9463,23513,192683,6497,3566	ABCA2,ARRB1,LRP1,LRPAP1,PICK1,SCRIB,SCAMP5,SKI,IL4R
12_Member	GO Biological Processes	GO:0030100	regulation of endocytosis	-4.08936	-1.02143	7/208	20,408,4035,4043,9463,23513,192683	ABCA2,ARRB1,LRP1,LRPAP1,PICK1,SCRIB,SCAMP5
12_Member	GO Biological Processes	GO:0002090	regulation of receptor internalization	-3.70772	-0.87955	4/58	408,4043,9463,23513	ARRB1,LRPAP1,PICK1,SCRIB
12_Member	GO Biological Processes	GO:0048259	regulation of receptor-mediated endocytosis	-3.65712	-0.87804	5/110	20,408,4043,9463,23513	ABCA2,ARRB1,LRPAP1,PICK1,SCRIB
12_Member	GO Biological Processes	GO:0021782	glial cell development	-2.68891	-0.482742	4/108	20,4035,6497,9463	ABCA2,LRP1,SKI,PICK1
12_Member	GO Biological Processes	GO:0045806	negative regulation of endocytosis	-2.57	-0.40516	3/56	20,4043,192683	ABCA2,LRPAP1,SCAMP5
12_Member	GO Biological Processes	GO:0042063	gliogenesis	-2.36955	-0.308204	5/214	20,4035,6497,9463,23513	ABCA2,LRP1,SKI,PICK1,SCRIB
12_Member	GO Biological Processes	GO:0060627	regulation of vesicle-mediated transport	-2.31288	-0.286338	8/529	20,408,3566,4035,4043,9463,23513,192683	ABCA2,ARRB1,IL4R,LRP1,LRPAP1,PICK1,SCRIB,SCAMP5
12_Member	GO Biological Processes	GO:0010001	glial cell differentiation	-2.01976	-0.133968	4/167	20,4035,6497,9463	ABCA2,LRP1,SKI,PICK1
13_Summary	WikiPathways	WP289	Myometrial relaxation and contraction pathways	-3.86024	-0.935696	6/158	59,112,408,784,5580,8525	ACTA2,ADCY6,ARRB1,CACNB3,PRKCD,DGKZ
13_Member	WikiPathways	WP289	Myometrial relaxation and contraction pathways	-3.86024	-0.935696	6/158	59,112,408,784,5580,8525	ACTA2,ADCY6,ARRB1,CACNB3,PRKCD,DGKZ
13_Member	WikiPathways	WP536	Calcium regulation in cardiac cells	-2.16031	-0.217055	4/152	112,408,784,5580	ADCY6,ARRB1,CACNB3,PRKCD
14_Summary	GO Biological Processes	GO:0032970	regulation of actin filament-based process	-3.82282	-0.923291	9/392	59,3265,4035,4088,5580,9463,10174,54961,116985,5119,50861,3985,8379	ACTA2,HRAS,LRP1,SMAD3,PRKCD,PICK1,SORBS3,SSH3,ARAP1,CHMP1A,STMN3,LIMK2,MAD1L1
14_Member	GO Biological Processes	GO:0032970	regulation of actin filament-based process	-3.82282	-0.923291	9/392	59,3265,4035,4088,5580,9463,10174,54961,116985	ACTA2,HRAS,LRP1,SMAD3,PRKCD,PICK1,SORBS3,SSH3,ARAP1
14_Member	GO Biological Processes	GO:0051493	regulation of cytoskeleton organization	-3.53433	-0.810893	10/525	3265,4035,4088,5119,5580,9463,10174,50861,54961,116985	HRAS,LRP1,SMAD3,CHMP1A,PRKCD,PICK1,SORBS3,STMN3,SSH3,ARAP1
14_Member	GO Biological Processes	GO:0032956	regulation of actin cytoskeleton organization	-3.43294	-0.749008	8/351	3265,4035,4088,5580,9463,10174,54961,116985	HRAS,LRP1,SMAD3,PRKCD,PICK1,SORBS3,SSH3,ARAP1
14_Member	GO Biological Processes	GO:0110053	regulation of actin filament organization	-2.64974	-0.452273	6/269	4088,5580,9463,10174,54961,116985	SMAD3,PRKCD,PICK1,SORBS3,SSH3,ARAP1
14_Member	GO Biological Processes	GO:0010639	negative regulation of organelle organization	-2.19348	-0.234834	6/334	3985,5580,8379,9463,54961,116985	LIMK2,PRKCD,MAD1L1,PICK1,SSH3,ARAP1
14_Member	GO Biological Processes	GO:0051494	negative regulation of cytoskeleton organization	-2.09277	-0.177806	4/159	5580,9463,54961,116985	PRKCD,PICK1,SSH3,ARAP1
14_Member	GO Biological Processes	GO:1902904	negative regulation of supramolecular fiber organization	-2.05573	-0.157753	4/163	5580,9463,54961,116985	PRKCD,PICK1,SSH3,ARAP1
15_Summary	GO Biological Processes	GO:0030029	actin filament-based process	-3.68206	-0.879446	11/602	408,3985,4650,6464,9294,10174,11188,23396,54961,79778,116985,1471,11173,11285,50861	ARRB1,LIMK2,MYO9B,SHC1,S1PR2,SORBS3,NISCH,PIP5K1C,SSH3,MICALL2,ARAP1,CST3,ADAMTS7,B4GALT7,STMN3
15_Member	GO Biological Processes	GO:0030029	actin filament-based process	-3.68206	-0.879446	11/602	408,3985,4650,6464,9294,10174,11188,23396,54961,79778,116985	ARRB1,LIMK2,MYO9B,SHC1,S1PR2,SORBS3,NISCH,PIP5K1C,SSH3,MICALL2,ARAP1
15_Member	GO Biological Processes	GO:0030036	actin cytoskeleton organization	-3.43808	-0.749008	10/540	408,3985,6464,9294,10174,11188,23396,54961,79778,116985	ARRB1,LIMK2,SHC1,S1PR2,SORBS3,NISCH,PIP5K1C,SSH3,MICALL2,ARAP1
15_Member	GO Biological Processes	GO:0031532	actin cytoskeleton reorganization	-3.39293	-0.745216	4/70	6464,9294,79778,116985	SHC1,S1PR2,MICALL2,ARAP1
15_Member	GO Biological Processes	GO:0097435	supramolecular fiber organization	-2.92718	-0.563066	9/522	408,1471,3985,10174,11173,11285,50861,79778,116985	ARRB1,CST3,LIMK2,SORBS3,ADAMTS7,B4GALT7,STMN3,MICALL2,ARAP1
16_Summary	Reactome Gene Sets	R-HSA-9716542	Signaling by Rho GTPases, Miro GTPases and RHOBTB3	-3.58731	-0.840358	12/723	3163,3985,4650,5580,7410,8379,10383,11188,23513,55240,89941,116985,408,8567,50861	HMOX2,LIMK2,MYO9B,PRKCD,VAV2,MAD1L1,TUBB4B,NISCH,SCRIB,STEAP3,RHOT2,ARAP1,ARRB1,MADD,STMN3
16_Member	Reactome Gene Sets	R-HSA-9716542	Signaling by Rho GTPases, Miro GTPases and RHOBTB3	-3.58731	-0.840358	12/723	3163,3985,4650,5580,7410,8379,10383,11188,23513,55240,89941,116985	HMOX2,LIMK2,MYO9B,PRKCD,VAV2,MAD1L1,TUBB4B,NISCH,SCRIB,STEAP3,RHOT2,ARAP1
16_Member	Reactome Gene Sets	R-HSA-194315	Signaling by Rho GTPases	-3.09868	-0.627092	11/707	3163,3985,4650,5580,7410,8379,10383,11188,23513,55240,116985	HMOX2,LIMK2,MYO9B,PRKCD,VAV2,MAD1L1,TUBB4B,NISCH,SCRIB,STEAP3,ARAP1
16_Member	Reactome Gene Sets	R-HSA-9013148	CDC42 GTPase cycle	-2.97757	-0.575363	5/155	4650,7410,23513,55240,116985	MYO9B,VAV2,SCRIB,STEAP3,ARAP1
16_Member	Canonical Pathways	M68	PID RHOA REG PATHWAY	-2.81592	-0.533691	3/46	4650,7410,116985	MYO9B,VAV2,ARAP1
16_Member	GO Biological Processes	GO:0051056	regulation of small GTPase mediated signal transduction	-2.42375	-0.339517	6/299	408,4650,7410,8567,50861,116985	ARRB1,MYO9B,VAV2,MADD,STMN3,ARAP1
16_Member	Reactome Gene Sets	R-HSA-8980692	RHOA GTPase cycle	-2.21083	-0.237951	4/147	3163,4650,7410,116985	HMOX2,MYO9B,VAV2,ARAP1
16_Member	Reactome Gene Sets	R-HSA-9012999	RHO GTPase cycle	-2.15119	-0.217055	7/449	3163,4650,7410,11188,23513,55240,116985	HMOX2,MYO9B,VAV2,NISCH,SCRIB,STEAP3,ARAP1
16_Member	Reactome Gene Sets	R-HSA-2029480	Fcgamma receptor (FCGR) dependent phagocytosis	-2.04935	-0.152911	3/86	4650,5580,7410	MYO9B,PRKCD,VAV2
17_Summary	Reactome Gene Sets	R-HSA-375165	NCAM signaling for neurite out-growth	-3.56865	-0.83475	4/63	784,1287,1291,3265,3339,85301,1026,1759,23513,84552	CACNB3,COL4A5,COL6A1,HRAS,HSPG2,COL27A1,CDKN1A,DNM1,SCRIB,PARD6G
17_Member	Reactome Gene Sets	R-HSA-375165	NCAM signaling for neurite out-growth	-3.56865	-0.83475	4/63	784,1287,1291,3265	CACNB3,COL4A5,COL6A1,HRAS
17_Member	Canonical Pathways	M5887	NABA BASEMENT MEMBRANES	-2.99305	-0.585887	3/40	1287,1291,3339	COL4A5,COL6A1,HSPG2
17_Member	Reactome Gene Sets	R-HSA-419037	NCAM1 interactions	-2.931	-0.563066	3/42	784,1287,1291	CACNB3,COL4A5,COL6A1
17_Member	Canonical Pathways	M3005	NABA COLLAGENS	-2.87205	-0.550666	3/44	1287,1291,85301	COL4A5,COL6A1,COL27A1
17_Member	Reactome Gene Sets	R-HSA-8948216	Collagen chain trimerization	-2.87205	-0.550666	3/44	1287,1291,85301	COL4A5,COL6A1,COL27A1
17_Member	Reactome Gene Sets	R-HSA-186797	Signaling by PDGF	-2.52657	-0.385073	3/58	1287,1291,3265	COL4A5,COL6A1,HRAS
17_Member	Reactome Gene Sets	R-HSA-2022090	Assembly of collagen fibrils and other multimeric structures	-2.4644	-0.358266	3/61	1287,1291,85301	COL4A5,COL6A1,COL27A1
17_Member	Reactome Gene Sets	R-HSA-1650814	Collagen biosynthesis and modifying enzymes	-2.34954	-0.308204	3/67	1287,1291,85301	COL4A5,COL6A1,COL27A1
17_Member	WikiPathways	WP2572	Primary focal segmental glomerulosclerosis (FSGS)	-2.22906	-0.242208	3/74	1026,1287,1759	CDKN1A,COL4A5,DNM1
17_Member	KEGG Pathway	hsa05165	Human papillomavirus infection	-2.21199	-0.237951	6/331	1026,1287,1291,3265,23513,84552	CDKN1A,COL4A5,COL6A1,HRAS,SCRIB,PARD6G
17_Member	Reactome Gene Sets	R-HSA-3000178	ECM proteoglycans	-2.19694	-0.235863	3/76	1287,1291,3339	COL4A5,COL6A1,HSPG2
17_Member	Reactome Gene Sets	R-HSA-216083	Integrin cell surface interactions	-2.06322	-0.163693	3/85	1287,1291,3339	COL4A5,COL6A1,HSPG2
17_Member	KEGG Pathway	hsa04512	ECM-receptor interaction	-2.02214	-0.134846	3/88	1287,1291,3339	COL4A5,COL6A1,HSPG2
18_Summary	Reactome Gene Sets	R-HSA-2262752	Cellular responses to stress	-3.40793	-0.747836	12/757	1026,3163,5580,6158,6464,9997,10383,23466,26523,27244,79726,84335,112,23396	CDKN1A,HMOX2,PRKCD,RPL28,SHC1,SCO2,TUBB4B,CBX6,AGO1,SESN1,WDR59,AKT1S1,ADCY6,PIP5K1C
18_Member	Reactome Gene Sets	R-HSA-2262752	Cellular responses to stress	-3.40793	-0.747836	12/757	1026,3163,5580,6158,6464,9997,10383,23466,26523,27244,79726,84335	CDKN1A,HMOX2,PRKCD,RPL28,SHC1,SCO2,TUBB4B,CBX6,AGO1,SESN1,WDR59,AKT1S1
18_Member	Reactome Gene Sets	R-HSA-8953897	Cellular responses to stimuli	-3.33722	-0.722932	12/771	1026,3163,5580,6158,6464,9997,10383,23466,26523,27244,79726,84335	CDKN1A,HMOX2,PRKCD,RPL28,SHC1,SCO2,TUBB4B,CBX6,AGO1,SESN1,WDR59,AKT1S1
18_Member	Reactome Gene Sets	R-HSA-9006925	Intracellular signaling by second messengers	-3.05034	-0.595748	7/309	112,1026,5580,23396,23466,26523,84335	ADCY6,CDKN1A,PRKCD,PIP5K1C,CBX6,AGO1,AKT1S1
18_Member	Reactome Gene Sets	R-HSA-5628897	TP53 Regulates Metabolic Genes	-2.03566	-0.142766	3/87	9997,26523,27244	SCO2,AGO1,SESN1
19_Summary	Canonical Pathways	M72	PID NECTIN PATHWAY	-3.36362	-0.741213	3/30	5818,7410,23396,3985,5580,4035,11334	NECTIN1,VAV2,PIP5K1C,LIMK2,PRKCD,LRP1,TUSC2
19_Member	Canonical Pathways	M72	PID NECTIN PATHWAY	-3.36362	-0.741213	3/30	5818,7410,23396	NECTIN1,VAV2,PIP5K1C
19_Member	KEGG Pathway	hsa04666	Fc gamma R-mediated phagocytosis	-2.86019	-0.550404	4/97	3985,5580,7410,23396	LIMK2,PRKCD,VAV2,PIP5K1C
19_Member	GO Biological Processes	GO:0006909	phagocytosis	-2.2153	-0.237951	5/233	4035,5580,7410,11334,23396	LRP1,PRKCD,VAV2,TUSC2,PIP5K1C
20_Summary	GO Biological Processes	GO:0048147	negative regulation of fibroblast proliferation	-3.36362	-0.741213	3/30	6497,11285,94241,1026	SKI,B4GALT7,TP53INP1,CDKN1A
20_Member	GO Biological Processes	GO:0048147	negative regulation of fibroblast proliferation	-3.36362	-0.741213	3/30	6497,11285,94241	SKI,B4GALT7,TP53INP1
20_Member	GO Biological Processes	GO:0048145	regulation of fibroblast proliferation	-3.19333	-0.666187	4/79	1026,6497,11285,94241	CDKN1A,SKI,B4GALT7,TP53INP1

## Sheet: Enrichment_Downregulated
GroupID	Category	Term	Description	LogP	Log(q-value)	InTerm_InList	Genes	Symbols
1_Summary	GO Biological Processes	GO:0006974	cellular response to DNA damage stimulus	-9.83689	-5.64667	28/709	1386,2966,4331,5983,6880,7341,7398,9126,10111,10600,10635,10714,11201,11335,23244,23376,23514,25842,28985,54780,54969,57223,79968,84259,201973,221443,261726,728340,3104,5000,51022,55345,83940	ATF2,GTF2H2,MNAT1,RFC3,TAF9,SUMO1,USP1,SMC3,RAD50,USP16,RAD51AP1,POLD3,POLI,CBX3,PDS5A,UFL1,SPIDR,ASF1A,MCTS1,NSMCE4A,HPF1,PPP4R3B,WDR76,DCUN1D5,PRIMPOL,OARD1,TIPRL,GTF2H2C,ZBTB48,ORC4,GLRX2,ZGRF1,TATDN1
1_Member	GO Biological Processes	GO:0006974	cellular response to DNA damage stimulus	-9.83689	-5.64667	28/709	1386,2966,4331,5983,6880,7341,7398,9126,10111,10600,10635,10714,11201,11335,23244,23376,23514,25842,28985,54780,54969,57223,79968,84259,201973,221443,261726,728340	ATF2,GTF2H2,MNAT1,RFC3,TAF9,SUMO1,USP1,SMC3,RAD50,USP16,RAD51AP1,POLD3,POLI,CBX3,PDS5A,UFL1,SPIDR,ASF1A,MCTS1,NSMCE4A,HPF1,PPP4R3B,WDR76,DCUN1D5,PRIMPOL,OARD1,TIPRL,GTF2H2C
1_Member	GO Biological Processes	GO:0006259	DNA metabolic process	-6.68099	-3.76567	23/703	2966,3104,4331,5000,5983,7341,7398,9126,10111,10635,10714,11201,23244,23376,23514,25842,51022,54780,54969,55345,83940,201973,728340	GTF2H2,ZBTB48,MNAT1,ORC4,RFC3,SUMO1,USP1,SMC3,RAD50,RAD51AP1,POLD3,POLI,PDS5A,UFL1,SPIDR,ASF1A,GLRX2,NSMCE4A,HPF1,ZGRF1,TATDN1,PRIMPOL,GTF2H2C
1_Member	GO Biological Processes	GO:0006281	DNA repair	-6.32174	-3.49357	18/469	2966,4331,5983,7341,7398,9126,10111,10635,10714,11201,23244,23376,23514,25842,54780,54969,201973,728340	GTF2H2,MNAT1,RFC3,SUMO1,USP1,SMC3,RAD50,RAD51AP1,POLD3,POLI,PDS5A,UFL1,SPIDR,ASF1A,NSMCE4A,HPF1,PRIMPOL,GTF2H2C
2_Summary	GO Biological Processes	GO:0043043	peptide biosynthetic process	-9.69232	-5.64667	20/359	2058,2617,3646,4528,6144,6173,6897,8894,9521,10056,10605,11222,28973,28985,51187,55278,79731,83939,132949,200916,51022,1978,10797,81034,94101,11340,54482,63899,285605,10438,55596,55759,196074,4594,26227,51074	EPRS1,GARS1,EIF3E,MTIF2,RPL21,RPL36A,TARS1,EIF2S2,EEF1E1,FARSB,PAIP1,MRPL3,MRPS18B,MCTS1,RSL24D1,QRSL1,NARS2,EIF2A,AASDH,RPL22L1,GLRX2,EIF4EBP1,MTHFD2,SLC25A32,ORMDL1,EXOSC8,TRMT13,NSUN3,DTWD2,C1D,ZCCHC8,WDR12,METTL15,MMUT,PHGDH,APIP
2_Member	GO Biological Processes	GO:0043043	peptide biosynthetic process	-9.69232	-5.64667	20/359	2058,2617,3646,4528,6144,6173,6897,8894,9521,10056,10605,11222,28973,28985,51187,55278,79731,83939,132949,200916	EPRS1,GARS1,EIF3E,MTIF2,RPL21,RPL36A,TARS1,EIF2S2,EEF1E1,FARSB,PAIP1,MRPL3,MRPS18B,MCTS1,RSL24D1,QRSL1,NARS2,EIF2A,AASDH,RPL22L1
2_Member	GO Biological Processes	GO:0006412	translation	-9.4299	-5.56034	19/332	2058,2617,3646,4528,6144,6173,6897,8894,9521,10056,10605,11222,28973,28985,51187,55278,79731,83939,200916	EPRS1,GARS1,EIF3E,MTIF2,RPL21,RPL36A,TARS1,EIF2S2,EEF1E1,FARSB,PAIP1,MRPL3,MRPS18B,MCTS1,RSL24D1,QRSL1,NARS2,EIF2A,RPL22L1
2_Member	GO Biological Processes	GO:0006518	peptide metabolic process	-8.12225	-4.72128	21/489	2058,2617,3646,4528,6144,6173,6897,8894,9521,10056,10605,11222,28973,28985,51022,51187,55278,79731,83939,132949,200916	EPRS1,GARS1,EIF3E,MTIF2,RPL21,RPL36A,TARS1,EIF2S2,EEF1E1,FARSB,PAIP1,MRPL3,MRPS18B,MCTS1,GLRX2,RSL24D1,QRSL1,NARS2,EIF2A,AASDH,RPL22L1
2_Member	GO Biological Processes	GO:0043604	amide biosynthetic process	-7.6339	-4.40116	20/474	2058,2617,3646,4528,6144,6173,6897,8894,9521,10056,10605,11222,28973,28985,51187,55278,79731,83939,132949,200916	EPRS1,GARS1,EIF3E,MTIF2,RPL21,RPL36A,TARS1,EIF2S2,EEF1E1,FARSB,PAIP1,MRPL3,MRPS18B,MCTS1,RSL24D1,QRSL1,NARS2,EIF2A,AASDH,RPL22L1
2_Member	Reactome Gene Sets	R-HSA-72766	Translation	-6.96647	-3.97258	15/291	1978,2058,2617,3646,4528,6144,6173,6897,8894,9521,10056,11222,28973,79731,200916	EIF4EBP1,EPRS1,GARS1,EIF3E,MTIF2,RPL21,RPL36A,TARS1,EIF2S2,EEF1E1,FARSB,MRPL3,MRPS18B,NARS2,RPL22L1
2_Member	GO Biological Processes	GO:0043603	cellular amide metabolic process	-6.77424	-3.82549	24/750	2058,2617,3646,4528,6144,6173,6897,8894,9521,10056,10605,10797,11222,28973,28985,51022,51187,55278,79731,81034,83939,94101,132949,200916	EPRS1,GARS1,EIF3E,MTIF2,RPL21,RPL36A,TARS1,EIF2S2,EEF1E1,FARSB,PAIP1,MTHFD2,MRPL3,MRPS18B,MCTS1,GLRX2,RSL24D1,QRSL1,NARS2,SLC25A32,EIF2A,ORMDL1,AASDH,RPL22L1
2_Member	GO Biological Processes	GO:0043038	amino acid activation	-6.73751	-3.8058	7/45	2058,2617,6897,10056,55278,79731,132949	EPRS1,GARS1,TARS1,FARSB,QRSL1,NARS2,AASDH
2_Member	Reactome Gene Sets	R-HSA-379724	tRNA Aminoacylation	-5.62318	-2.88089	6/42	2058,2617,6897,9521,10056,79731	EPRS1,GARS1,TARS1,EEF1E1,FARSB,NARS2
2_Member	Reactome Gene Sets	R-HSA-379716	Cytosolic tRNA aminoacylation	-5.61479	-2.88089	5/24	2058,2617,6897,9521,10056	EPRS1,GARS1,TARS1,EEF1E1,FARSB
2_Member	GO Biological Processes	GO:0043039	tRNA aminoacylation	-5.50099	-2.78778	6/44	2058,2617,6897,10056,55278,79731	EPRS1,GARS1,TARS1,FARSB,QRSL1,NARS2
2_Member	GO Biological Processes	GO:0006399	tRNA metabolic process	-5.18224	-2.53452	10/177	2058,2617,6897,10056,11340,54482,55278,63899,79731,285605	EPRS1,GARS1,TARS1,FARSB,EXOSC8,TRMT13,QRSL1,NSUN3,NARS2,DTWD2
2_Member	KEGG Pathway	hsa00970	Aminoacyl-tRNA biosynthesis	-4.46544	-1.98799	6/66	2058,2617,6897,10056,55278,79731	EPRS1,GARS1,TARS1,FARSB,QRSL1,NARS2
2_Member	GO Biological Processes	GO:0006418	tRNA aminoacylation for protein translation	-4.42444	-1.96424	5/41	2058,2617,6897,10056,79731	EPRS1,GARS1,TARS1,FARSB,NARS2
2_Member	GO Biological Processes	GO:0034660	ncRNA metabolic process	-3.85036	-1.53306	14/470	2058,2617,6897,10056,10438,11340,54482,55278,55596,55759,63899,79731,196074,285605	EPRS1,GARS1,TARS1,FARSB,C1D,EXOSC8,TRMT13,QRSL1,ZCCHC8,WDR12,NSUN3,NARS2,METTL15,DTWD2
2_Member	GO Biological Processes	GO:0006520	cellular amino acid metabolic process	-3.55924	-1.33312	10/276	2058,2617,4594,6897,10056,26227,51074,55278,79731,132949	EPRS1,GARS1,MMUT,TARS1,FARSB,PHGDH,APIP,QRSL1,NARS2,AASDH
3_Summary	GO Biological Processes	GO:0065004	protein-DNA complex assembly	-8.57533	-4.91193	14/187	3006,3008,3017,4673,6880,8340,8347,8358,8970,23421,25842,54700,55355,64105,4331,5000,5983,7341,8331,8548,9126,9493,10714,10733,23244,55166,79023,80184,140609,220134,64431,10111,2966,11335,6917,7398,10635,11201,23514,8089,301,7913,648,9849,10600,10927,4089,6478,10254,29761,55288,1386,3799,3895,2790,4893,5870,51109,28973,728340,10196,5534,50999,51699,51701,9021,25963,892,837	H1-2,H1-4,H2BC5,NAP1L1,TAF9,H2BC13,H2BC4,H3C2,H2BC11,ITGB3BP,ASF1A,RRN3,HJURP,CENPK,MNAT1,ORC4,RFC3,SUMO1,H2AC14,BLZF1,SMC3,KIF23,POLD3,PLK4,PDS5A,CENPQ,NUP37,CEP290,NEK7,SKA1,ACTR6,RAD50,GTF2H2,CBX3,TCEA1,USP1,RAD51AP1,POLI,SPIDR,YEATS4,ANXA1,DEK,BMI1,ZNF518A,USP16,SPIN1,SMAD4,SIAH2,STAM2,USP25,RHOT1,ATF2,KIF5B,KTN1,GNG10,NRAS,RAB6A,RDH11,MRPS18B,GTF2H2C,PRMT3,PPP3R1,TMED5,VPS29,NLK,SOCS3,TMEM87…
3_Member	GO Biological Processes	GO:0065004	protein-DNA complex assembly	-8.57533	-4.91193	14/187	3006,3008,3017,4673,6880,8340,8347,8358,8970,23421,25842,54700,55355,64105	H1-2,H1-4,H2BC5,NAP1L1,TAF9,H2BC13,H2BC4,H3C2,H2BC11,ITGB3BP,ASF1A,RRN3,HJURP,CENPK
3_Member	Reactome Gene Sets	R-HSA-69278	Cell Cycle, Mitotic	-8.48047	-4.91193	23/560	3017,4331,5000,5983,7341,8331,8340,8347,8358,8548,8970,9126,9493,10714,10733,23244,23421,55166,64105,79023,80184,140609,220134	H2BC5,MNAT1,ORC4,RFC3,SUMO1,H2AC14,H2BC13,H2BC4,H3C2,BLZF1,H2BC11,SMC3,KIF23,POLD3,PLK4,PDS5A,ITGB3BP,CENPQ,CENPK,NUP37,CEP290,NEK7,SKA1
3_Member	GO Biological Processes	GO:0071824	protein-DNA complex subunit organization	-8.07355	-4.72128	15/240	3006,3008,3017,4673,6880,8340,8347,8358,8970,23421,25842,54700,55355,64105,64431	H1-2,H1-4,H2BC5,NAP1L1,TAF9,H2BC13,H2BC4,H3C2,H2BC11,ITGB3BP,ASF1A,RRN3,HJURP,CENPK,ACTR6
3_Member	Reactome Gene Sets	R-HSA-1640170	Cell Cycle	-8.06797	-4.72128	25/691	3017,4331,5000,5983,7341,8331,8340,8347,8358,8548,8970,9126,9493,10111,10714,10733,23244,23421,55166,55355,64105,79023,80184,140609,220134	H2BC5,MNAT1,ORC4,RFC3,SUMO1,H2AC14,H2BC13,H2BC4,H3C2,BLZF1,H2BC11,SMC3,KIF23,RAD50,POLD3,PLK4,PDS5A,ITGB3BP,CENPQ,HJURP,CENPK,NUP37,CEP290,NEK7,SKA1
3_Member	Reactome Gene Sets	R-HSA-73772	RNA Polymerase I Promoter Escape	-7.87863	-4.57334	10/91	2966,3017,4331,8331,8340,8347,8358,8970,11335,54700	GTF2H2,H2BC5,MNAT1,H2AC14,H2BC13,H2BC4,H3C2,H2BC11,CBX3,RRN3
3_Member	Reactome Gene Sets	R-HSA-68886	M Phase	-7.79036	-4.52286	19/418	3017,7341,8331,8340,8347,8358,8548,8970,9126,9493,10733,23244,23421,55166,64105,79023,80184,140609,220134	H2BC5,SUMO1,H2AC14,H2BC13,H2BC4,H3C2,BLZF1,H2BC11,SMC3,KIF23,PLK4,PDS5A,ITGB3BP,CENPQ,CENPK,NUP37,CEP290,NEK7,SKA1
3_Member	GO Biological Processes	GO:0006334	nucleosome assembly	-7.58572	-4.39543	11/125	3006,3008,3017,4673,8340,8347,8358,8970,23421,25842,55355	H1-2,H1-4,H2BC5,NAP1L1,H2BC13,H2BC4,H3C2,H2BC11,ITGB3BP,ASF1A,HJURP
3_Member	Reactome Gene Sets	R-HSA-606279	Deposition of new CENPA-containing nucleosomes at the centromere	-7.53799	-4.39543	9/74	3017,8331,8340,8347,8970,23421,55166,55355,64105	H2BC5,H2AC14,H2BC13,H2BC4,H2BC11,ITGB3BP,CENPQ,HJURP,CENPK
3_Member	Reactome Gene Sets	R-HSA-774815	Nucleosome assembly	-7.53799	-4.39543	9/74	3017,8331,8340,8347,8970,23421,55166,55355,64105	H2BC5,H2AC14,H2BC13,H2BC4,H2BC11,ITGB3BP,CENPQ,HJURP,CENPK
3_Member	Reactome Gene Sets	R-HSA-2559586	DNA Damage/Telomere Stress Induced Senescence	-7.2372	-4.12096	9/80	3006,3008,3017,8331,8340,8347,8970,10111,25842	H1-2,H1-4,H2BC5,H2AC14,H2BC13,H2BC4,H2BC11,RAD50,ASF1A
3_Member	Reactome Gene Sets	R-HSA-73854	RNA Polymerase I Promoter Clearance	-7.08256	-3.99115	10/110	2966,3017,4331,8331,8340,8347,8358,8970,11335,54700	GTF2H2,H2BC5,MNAT1,H2AC14,H2BC13,H2BC4,H3C2,H2BC11,CBX3,RRN3
3_Member	Reactome Gene Sets	R-HSA-73886	Chromosome Maintenance	-7.04417	-3.98353	11/141	3017,5983,8331,8340,8347,8970,10714,23421,55166,55355,64105	H2BC5,RFC3,H2AC14,H2BC13,H2BC4,H2BC11,POLD3,ITGB3BP,CENPQ,HJURP,CENPK
3_Member	GO Biological Processes	GO:0031497	chromatin assembly	-7.01158	-3.98353	12/175	3006,3008,3017,4673,8340,8347,8358,8970,11335,23421,25842,55355	H1-2,H1-4,H2BC5,NAP1L1,H2BC13,H2BC4,H3C2,H2BC11,CBX3,ITGB3BP,ASF1A,HJURP
3_Member	Reactome Gene Sets	R-HSA-73864	RNA Polymerase I Transcription	-7.008	-3.98353	10/112	2966,3017,4331,8331,8340,8347,8358,8970,11335,54700	GTF2H2,H2BC5,MNAT1,H2AC14,H2BC13,H2BC4,H3C2,H2BC11,CBX3,RRN3
3_Member	GO Biological Processes	GO:0034728	nucleosome organization	-6.95754	-3.97258	12/177	3006,3008,3017,4673,8340,8347,8358,8970,23421,25842,55355,64431	H1-2,H1-4,H2BC5,NAP1L1,H2BC13,H2BC4,H3C2,H2BC11,ITGB3BP,ASF1A,HJURP,ACTR6
3_Member	Reactome Gene Sets	R-HSA-73894	DNA Repair	-6.93859	-3.97212	16/335	2966,3017,4331,5983,6917,7341,7398,8331,8340,8347,8970,10111,10635,10714,11201,23514	GTF2H2,H2BC5,MNAT1,RFC3,TCEA1,SUMO1,USP1,H2AC14,H2BC13,H2BC4,H2BC11,RAD50,RAD51AP1,POLD3,POLI,SPIDR
3_Member	GO Biological Processes	GO:0006338	chromatin remodeling	-6.6301	-3.73057	14/267	3006,3008,3017,4673,8089,8340,8347,8358,8970,11335,23421,25842,55355,64431	H1-2,H1-4,H2BC5,NAP1L1,YEATS4,H2BC13,H2BC4,H3C2,H2BC11,CBX3,ITGB3BP,ASF1A,HJURP,ACTR6
3_Member	GO Biological Processes	GO:0071103	DNA conformation change	-6.54143	-3.65714	15/314	301,3006,3008,3017,4673,5983,8340,8347,8358,8970,10111,11335,23421,25842,55355	ANXA1,H1-2,H1-4,H2BC5,NAP1L1,RFC3,H2BC13,H2BC4,H3C2,H2BC11,RAD50,CBX3,ITGB3BP,ASF1A,HJURP
3_Member	GO Biological Processes	GO:0006333	chromatin assembly or disassembly	-6.50124	-3.64592	12/195	3006,3008,3017,4673,8340,8347,8358,8970,11335,23421,25842,55355	H1-2,H1-4,H2BC5,NAP1L1,H2BC13,H2BC4,H3C2,H2BC11,CBX3,ITGB3BP,ASF1A,HJURP
3_Member	Reactome Gene Sets	R-HSA-5693567	HDR through Homologous Recombination (HRR) or Single Strand Annealing (SSA)	-6.33707	-3.49554	10/132	3017,5983,7341,8340,8347,8970,10111,10635,10714,23514	H2BC5,RFC3,SUMO1,H2BC13,H2BC4,H2BC11,RAD50,RAD51AP1,POLD3,SPIDR
3_Member	Reactome Gene Sets	R-HSA-5693538	Homology Directed Repair	-6.15841	-3.34321	10/138	3017,5983,7341,8340,8347,8970,10111,10635,10714,23514	H2BC5,RFC3,SUMO1,H2BC13,H2BC4,H2BC11,RAD50,RAD51AP1,POLD3,SPIDR
3_Member	GO Biological Processes	GO:0006323	DNA packaging	-5.98584	-3.18322	12/218	3006,3008,3017,4673,8340,8347,8358,8970,11335,23421,25842,55355	H1-2,H1-4,H2BC5,NAP1L1,H2BC13,H2BC4,H3C2,H2BC11,CBX3,ITGB3BP,ASF1A,HJURP
3_Member	Reactome Gene Sets	R-HSA-212165	Epigenetic regulation of gene expression	-5.85316	-3.07467	10/149	2966,3017,4331,7913,8331,8340,8347,8358,8970,11335	GTF2H2,H2BC5,MNAT1,DEK,H2AC14,H2BC13,H2BC4,H3C2,H2BC11,CBX3
3_Member	Reactome Gene Sets	R-HSA-2559583	Cellular Senescence	-5.5945	-2.87106	11/197	648,3006,3008,3017,8331,8340,8347,8358,8970,10111,25842	BMI1,H1-2,H1-4,H2BC5,H2AC14,H2BC13,H2BC4,H3C2,H2BC11,RAD50,ASF1A
3_Member	Reactome Gene Sets	R-HSA-68616	Assembly of the ORC complex at the origin of replication	-5.44373	-2.7405	7/69	3017,5000,8331,8340,8347,8358,8970	H2BC5,ORC4,H2AC14,H2BC13,H2BC4,H3C2,H2BC11
3_Member	Reactome Gene Sets	R-HSA-5693532	DNA Double-Strand Break Repair	-5.40649	-2.72785	10/167	3017,5983,7341,8340,8347,8970,10111,10635,10714,23514	H2BC5,RFC3,SUMO1,H2BC13,H2BC4,H2BC11,RAD50,RAD51AP1,POLD3,SPIDR
3_Member	Reactome Gene Sets	R-HSA-69620	Cell Cycle Checkpoints	-5.39329	-2.72785	13/293	3017,5000,5983,7341,8340,8347,8970,10111,23421,55166,64105,79023,220134	H2BC5,ORC4,RFC3,SUMO1,H2BC13,H2BC4,H2BC11,RAD50,ITGB3BP,CENPQ,CENPK,NUP37,SKA1
3_Member	Reactome Gene Sets	R-HSA-5250913	Positive epigenetic regulation of rRNA expression	-5.16889	-2.53032	8/106	3017,7913,8331,8340,8347,8358,8970,11335	H2BC5,DEK,H2AC14,H2BC13,H2BC4,H3C2,H2BC11,CBX3
3_Member	Reactome Gene Sets	R-HSA-427389	ERCC6 (CSB) and EHMT2 (G9a) positively regulate rRNA expression	-5.161	-2.53032	7/76	3017,8331,8340,8347,8358,8970,11335	H2BC5,H2AC14,H2BC13,H2BC4,H3C2,H2BC11,CBX3
3_Member	GO Biological Processes	GO:0006325	chromatin organization	-5.14428	-2.53026	18/569	648,3006,3008,3017,4673,8089,8340,8347,8358,8970,9849,10600,10927,11335,23421,25842,55355,64431	BMI1,H1-2,H1-4,H2BC5,NAP1L1,YEATS4,H2BC13,H2BC4,H3C2,H2BC11,ZNF518A,USP16,SPIN1,CBX3,ITGB3BP,ASF1A,HJURP,ACTR6
3_Member	Reactome Gene Sets	R-HSA-427413	NoRC negatively regulates rRNA expression	-5.1386	-2.53026	8/107	2966,3017,4331,8331,8340,8347,8358,8970	GTF2H2,H2BC5,MNAT1,H2AC14,H2BC13,H2BC4,H3C2,H2BC11
3_Member	Reactome Gene Sets	R-HSA-5689880	Ub-specific processing proteases	-5.13519	-2.53026	11/220	3017,4089,6478,8331,8340,8347,8970,10254,10600,29761,55288	H2BC5,SMAD4,SIAH2,H2AC14,H2BC13,H2BC4,H2BC11,STAM2,USP16,USP25,RHOT1
3_Member	Reactome Gene Sets	R-HSA-3214847	HATs acetylate histones	-5.12107	-2.53026	9/142	1386,3017,6880,8089,8331,8340,8347,8358,8970	ATF2,H2BC5,TAF9,YEATS4,H2AC14,H2BC13,H2BC4,H3C2,H2BC11
3_Member	Reactome Gene Sets	R-HSA-68875	Mitotic Prophase	-5.12107	-2.53026	9/142	3017,8331,8340,8347,8358,8548,8970,79023,140609	H2BC5,H2AC14,H2BC13,H2BC4,H3C2,BLZF1,H2BC11,NUP37,NEK7
3_Member	Reactome Gene Sets	R-HSA-5250941	Negative epigenetic regulation of rRNA expression	-5.04967	-2.46641	8/110	2966,3017,4331,8331,8340,8347,8358,8970	GTF2H2,H2BC5,MNAT1,H2AC14,H2BC13,H2BC4,H3C2,H2BC11
3_Member	Reactome Gene Sets	R-HSA-195258	RHO GTPase Effectors	-4.88212	-2.31359	13/327	3017,3799,3895,8331,8340,8347,8358,8970,23421,55166,64105,79023,220134	H2BC5,KIF5B,KTN1,H2AC14,H2BC13,H2BC4,H3C2,H2BC11,ITGB3BP,CENPQ,CENPK,NUP37,SKA1
3_Member	Reactome Gene Sets	R-HSA-1500620	Meiosis	-4.8256	-2.26425	8/118	3017,8331,8340,8347,8358,8970,9126,10111	H2BC5,H2AC14,H2BC13,H2BC4,H3C2,H2BC11,SMC3,RAD50
3_Member	Reactome Gene Sets	R-HSA-912446	Meiotic recombination	-4.80467	-2.25038	7/86	3017,8331,8340,8347,8358,8970,10111	H2BC5,H2AC14,H2BC13,H2BC4,H3C2,H2BC11,RAD50
3_Member	Reactome Gene Sets	R-HSA-9616222	Transcriptional regulation of granulopoiesis	-4.67518	-2.14141	7/90	3017,7913,8331,8340,8347,8358,8970	H2BC5,DEK,H2AC14,H2BC13,H2BC4,H3C2,H2BC11
3_Member	Reactome Gene Sets	R-HSA-5250924	B-WICH complex positively regulates rRNA expression	-4.64384	-2.12323	7/91	3017,7913,8331,8340,8347,8358,8970	H2BC5,DEK,H2AC14,H2BC13,H2BC4,H3C2,H2BC11
3_Member	Reactome Gene Sets	R-HSA-73884	Base Excision Repair	-4.61289	-2.09871	7/92	3017,5983,8331,8340,8347,8970,10714	H2BC5,RFC3,H2AC14,H2BC13,H2BC4,H2BC11,POLD3
3_Member	Reactome Gene Sets	R-HSA-73728	RNA Polymerase I Promoter Opening	-4.58156	-2.07997	6/63	3017,8331,8340,8347,8358,8970	H2BC5,H2AC14,H2BC13,H2BC4,H3C2,H2BC11
3_Member	Reactome Gene Sets	R-HSA-69473	G2/M DNA damage checkpoint	-4.5223	-2.03295	7/95	3017,5983,7341,8340,8347,8970,10111	H2BC5,RFC3,SUMO1,H2BC13,H2BC4,H2BC11,RAD50
3_Member	Reactome Gene Sets	R-HSA-5334118	DNA methylation	-4.50347	-2.02011	6/65	3017,8331,8340,8347,8358,8970	H2BC5,H2AC14,H2BC13,H2BC4,H3C2,H2BC11
3_Member	Reactome Gene Sets	R-HSA-5693607	Processing of DNA double-strand break ends	-4.43496	-1.96424	7/98	3017,5983,7341,8340,8347,8970,10111	H2BC5,RFC3,SUMO1,H2BC13,H2BC4,H2BC11,RAD50
3_Member	Reactome Gene Sets	R-HSA-5625886	Activated PKN1 stimulates transcription of AR (androgen receptor) regulated genes KLK2 and KLK3	-4.42806	-1.96424	6/67	3017,8331,8340,8347,8358,8970	H2BC5,H2AC14,H2BC13,H2BC4,H3C2,H2BC11
3_Member	Reactome Gene Sets	R-HSA-427359	SIRT1 negatively regulates rRNA expression	-4.3913	-1.93671	6/68	3017,8331,8340,8347,8358,8970	H2BC5,H2AC14,H2BC13,H2BC4,H3C2,H2BC11
3_Member	Reactome Gene Sets	R-HSA-5693571	Nonhomologous End-Joining (NHEJ)	-4.35515	-1.90609	6/69	3017,7341,8340,8347,8970,10111	H2BC5,SUMO1,H2BC13,H2BC4,H2BC11,RAD50
3_Member	Reactome Gene Sets	R-HSA-8939211	ESR-mediated signaling	-4.31696	-1.87336	10/223	1386,2790,3017,4893,8331,8340,8347,8358,8970,9126	ATF2,GNG10,H2BC5,NRAS,H2AC14,H2BC13,H2BC4,H3C2,H2BC11,SMC3
3_Member	Reactome Gene Sets	R-HSA-1474165	Reproduction	-4.22563	-1.8041	8/143	3017,8331,8340,8347,8358,8970,9126,10111	H2BC5,H2AC14,H2BC13,H2BC4,H3C2,H2BC11,SMC3,RAD50
3_Member	Reactome Gene Sets	R-HSA-5578749	Transcriptional regulation by small RNAs	-4.21637	-1.8041	7/106	3017,8331,8340,8347,8358,8970,79023	H2BC5,H2AC14,H2BC13,H2BC4,H3C2,H2BC11,NUP37
3_Member	Reactome Gene Sets	R-HSA-212300	PRC2 methylates histones and DNA	-4.21629	-1.8041	6/73	3017,8331,8340,8347,8358,8970	H2BC5,H2AC14,H2BC13,H2BC4,H3C2,H2BC11
3_Member	Reactome Gene Sets	R-HSA-9710421	Defective pyroptosis	-4.21629	-1.8041	6/73	3017,8331,8340,8347,8358,8970	H2BC5,H2AC14,H2BC13,H2BC4,H3C2,H2BC11
3_Member	Reactome Gene Sets	R-HSA-2299718	Condensation of Prophase Chromosomes	-4.18292	-1.77576	6/74	3017,8331,8340,8347,8358,8970	H2BC5,H2AC14,H2BC13,H2BC4,H3C2,H2BC11
3_Member	KEGG Pathway	hsa05034	Alcoholism	-4.17457	-1.77237	9/187	1386,2790,3017,4893,8331,8340,8347,8358,8970	ATF2,GNG10,H2BC5,NRAS,H2AC14,H2BC13,H2BC4,H3C2,H2BC11
3_Member	Reactome Gene Sets	R-HSA-1912422	Pre-NOTCH Expression and Processing	-4.13929	-1.74199	7/109	3017,5870,8331,8340,8347,8358,8970	H2BC5,RAB6A,H2AC14,H2BC13,H2BC4,H3C2,H2BC11
3_Member	Reactome Gene Sets	R-HSA-69306	DNA Replication	-4.12145	-1.7338	9/190	3017,5000,5983,8331,8340,8347,8358,8970,10714	H2BC5,ORC4,RFC3,H2AC14,H2BC13,H2BC4,H3C2,H2BC11,POLD3
3_Member	Reactome Gene Sets	R-HSA-977225	Amyloid fiber formation	-4.08926	-1.71227	7/111	3017,6478,8331,8340,8347,8358,8970	H2BC5,SIAH2,H2AC14,H2BC13,H2BC4,H3C2,H2BC11
3_Member	Reactome Gene Sets	R-HSA-5693565	Recruitment and ATM-mediated phosphorylation of repair and signaling proteins at DNA double strand breaks	-4.08583	-1.71227	6/77	3017,7341,8340,8347,8970,10111	H2BC5,SUMO1,H2BC13,H2BC4,H2BC11,RAD50
3_Member	Reactome Gene Sets	R-HSA-9018519	Estrogen-dependent gene expression	-4.07964	-1.71067	8/150	1386,3017,8331,8340,8347,8358,8970,9126	ATF2,H2BC5,H2AC14,H2BC13,H2BC4,H3C2,H2BC11,SMC3
3_Member	Reactome Gene Sets	R-HSA-5693606	DNA Double Strand Break Response	-4.05442	-1.69001	6/78	3017,7341,8340,8347,8970,10111	H2BC5,SUMO1,H2BC13,H2BC4,H2BC11,RAD50
3_Member	Reactome Gene Sets	R-HSA-157579	Telomere Maintenance	-4.04028	-1.68482	7/113	3017,5983,8331,8340,8347,8970,10714	H2BC5,RFC3,H2AC14,H2BC13,H2BC4,H2BC11,POLD3
3_Member	Reactome Gene Sets	R-HSA-1221632	Meiotic synapsis	-4.02347	-1.67679	6/79	3017,8331,8340,8347,8970,9126	H2BC5,H2AC14,H2BC13,H2BC4,H2BC11,SMC3
3_Member	Reactome Gene Sets	R-HSA-9610379	HCMV Late Events	-3.96868	-1.62632	7/116	3017,8331,8340,8347,8358,8970,79023	H2BC5,H2AC14,H2BC13,H2BC4,H3C2,H2BC11,NUP37
3_Member	Reactome Gene Sets	R-HSA-5688426	Deubiquitination	-3.93141	-1.59333	11/298	3017,4089,6478,8331,8340,8347,8970,10254,10600,29761,55288	H2BC5,SMAD4,SIAH2,H2AC14,H2BC13,H2BC4,H2BC11,STAM2,USP16,USP25,RHOT1
3_Member	Reactome Gene Sets	R-HSA-171306	Packaging Of Telomere Ends	-3.92043	-1.589	5/52	3017,8331,8340,8347,8970	H2BC5,H2AC14,H2BC13,H2BC4,H2BC11
3_Member	Reactome Gene Sets	R-HSA-9006931	Signaling by Nuclear Receptors	-3.91866	-1.589	11/299	1386,2790,3017,4893,8331,8340,8347,8358,8970,9126,51109	ATF2,GNG10,H2BC5,NRAS,H2AC14,H2BC13,H2BC4,H3C2,H2BC11,SMC3,RDH11
3_Member	KEGG Pathway	hsa05203	Viral carcinogenesis	-3.88645	-1.56507	9/204	1386,2966,3017,4893,8340,8347,8970,28973,728340	ATF2,GTF2H2,H2BC5,NRAS,H2BC13,H2BC4,H2BC11,MRPS18B,GTF2H2C
3_Member	Reactome Gene Sets	R-HSA-2559580	Oxidative Stress Induced Senescence	-3.7663	-1.47651	7/125	648,3017,8331,8340,8347,8358,8970	BMI1,H2BC5,H2AC14,H2BC13,H2BC4,H3C2,H2BC11
3_Member	Reactome Gene Sets	R-HSA-110330	Recognition and association of DNA glycosylase with site containing an affected purine	-3.76629	-1.47651	5/56	3017,8331,8340,8347,8970	H2BC5,H2AC14,H2BC13,H2BC4,H2BC11
3_Member	Reactome Gene Sets	R-HSA-110331	Cleavage of the damaged purine	-3.76629	-1.47651	5/56	3017,8331,8340,8347,8970	H2BC5,H2AC14,H2BC13,H2BC4,H2BC11
3_Member	Reactome Gene Sets	R-HSA-73927	Depurination	-3.76629	-1.47651	5/56	3017,8331,8340,8347,8970	H2BC5,H2AC14,H2BC13,H2BC4,H2BC11
3_Member	Reactome Gene Sets	R-HSA-69481	G2/M Checkpoints	-3.75671	-1.47072	8/167	3017,5000,5983,7341,8340,8347,8970,10111	H2BC5,ORC4,RFC3,SUMO1,H2BC13,H2BC4,H2BC11,RAD50
3_Member	Reactome Gene Sets	R-HSA-201722	Formation of the beta-catenin:TCF transactivating complex	-3.68383	-1.40534	6/91	3017,8331,8340,8347,8358,8970	H2BC5,H2AC14,H2BC13,H2BC4,H3C2,H2BC11
3_Member	Reactome Gene Sets	R-HSA-68867	Assembly of the pre-replicative complex	-3.66117	-1.40085	7/130	3017,5000,8331,8340,8347,8358,8970	H2BC5,ORC4,H2AC14,H2BC13,H2BC4,H3C2,H2BC11
3_Member	Reactome Gene Sets	R-HSA-8939236	RUNX1 regulates transcription of genes involved in differentiation of HSCs	-3.66117	-1.40085	7/130	3017,4331,8331,8340,8347,8358,8970	H2BC5,MNAT1,H2AC14,H2BC13,H2BC4,H3C2,H2BC11
3_Member	Reactome Gene Sets	R-HSA-1912408	Pre-NOTCH Transcription and Translation	-3.63228	-1.3755	6/93	3017,8331,8340,8347,8358,8970	H2BC5,H2AC14,H2BC13,H2BC4,H3C2,H2BC11
3_Member	Reactome Gene Sets	R-HSA-3214815	HDACs deacetylate histones	-3.60698	-1.35371	6/94	3017,8331,8340,8347,8358,8970	H2BC5,H2AC14,H2BC13,H2BC4,H3C2,H2BC11
3_Member	Reactome Gene Sets	R-HSA-110328	Recognition and association of DNA glycosylase with site containing an affected pyrimidine	-3.59024	-1.34925	5/61	3017,8331,8340,8347,8970	H2BC5,H2AC14,H2BC13,H2BC4,H2BC11
3_Member	Reactome Gene Sets	R-HSA-110329	Cleavage of the damaged pyrimidine	-3.59024	-1.34925	5/61	3017,8331,8340,8347,8970	H2BC5,H2AC14,H2BC13,H2BC4,H2BC11
3_Member	Reactome Gene Sets	R-HSA-73928	Depyrimidination	-3.59024	-1.34925	5/61	3017,8331,8340,8347,8970	H2BC5,H2AC14,H2BC13,H2BC4,H2BC11
3_Member	Reactome Gene Sets	R-HSA-3247509	Chromatin modifying enzymes	-3.58436	-1.34925	10/274	1386,3017,6880,8089,8331,8340,8347,8358,8970,10196	ATF2,H2BC5,TAF9,YEATS4,H2AC14,H2BC13,H2BC4,H3C2,H2BC11,PRMT3
3_Member	Reactome Gene Sets	R-HSA-4839726	Chromatin organization	-3.58436	-1.34925	10/274	1386,3017,6880,8089,8331,8340,8347,8358,8970,10196	ATF2,H2BC5,TAF9,YEATS4,H2AC14,H2BC13,H2BC4,H3C2,H2BC11,PRMT3
3_Member	Reactome Gene Sets	R-HSA-5625740	RHO GTPases activate PKNs	-3.58199	-1.34925	6/95	3017,8331,8340,8347,8358,8970	H2BC5,H2AC14,H2BC13,H2BC4,H3C2,H2BC11
3_Member	Reactome Gene Sets	R-HSA-9609690	HCMV Early Events	-3.56076	-1.33312	7/135	3017,8331,8340,8347,8358,8970,79023	H2BC5,H2AC14,H2BC13,H2BC4,H3C2,H2BC11,NUP37
3_Member	Reactome Gene Sets	R-HSA-8936459	RUNX1 regulates genes involved in megakaryocyte differentiation and platelet function	-3.53292	-1.31009	6/97	3017,8331,8340,8347,8358,8970	H2BC5,H2AC14,H2BC13,H2BC4,H3C2,H2BC11
3_Member	Reactome Gene Sets	R-HSA-195721	Signaling by WNT	-3.52649	-1.308	11/332	2790,3017,5534,8331,8340,8347,8358,8970,50999,51699,51701	GNG10,H2BC5,PPP3R1,H2AC14,H2BC13,H2BC4,H3C2,H2BC11,TMED5,VPS29,NLK
3_Member	Reactome Gene Sets	R-HSA-73929	Base-Excision Repair, AP Site Formation	-3.52435	-1.308	5/63	3017,8331,8340,8347,8970	H2BC5,H2AC14,H2BC13,H2BC4,H2BC11
3_Member	Reactome Gene Sets	R-HSA-211000	Gene Silencing by RNA	-3.50262	-1.28947	7/138	3017,8331,8340,8347,8358,8970,79023	H2BC5,H2AC14,H2BC13,H2BC4,H3C2,H2BC11,NUP37
3_Member	Reactome Gene Sets	R-HSA-9645723	Diseases of programmed cell death	-3.39253	-1.2042	6/103	3017,8331,8340,8347,8358,8970	H2BC5,H2AC14,H2BC13,H2BC4,H3C2,H2BC11
3_Member	Reactome Gene Sets	R-HSA-8878171	Transcriptional regulation by RUNX1	-3.37756	-1.19224	9/239	648,3017,4331,8331,8340,8347,8358,8970,9021	BMI1,H2BC5,MNAT1,H2AC14,H2BC13,H2BC4,H3C2,H2BC11,SOCS3
3_Member	Reactome Gene Sets	R-HSA-9670095	Inhibition of DNA recombination at telomere	-3.36953	-1.18792	5/68	3017,8331,8340,8347,8970	H2BC5,H2AC14,H2BC13,H2BC4,H2BC11
3_Member	Reactome Gene Sets	R-HSA-69002	DNA Replication Pre-Initiation	-3.33695	-1.16345	7/147	3017,5000,8331,8340,8347,8358,8970	H2BC5,ORC4,H2AC14,H2BC13,H2BC4,H3C2,H2BC11
3_Member	Reactome Gene Sets	R-HSA-2559582	Senescence-Associated Secretory Phenotype (SASP)	-3.19903	-1.04268	6/112	3017,8331,8340,8347,8358,8970	H2BC5,H2AC14,H2BC13,H2BC4,H3C2,H2BC11
3_Member	Reactome Gene Sets	R-HSA-9609646	HCMV Infection	-3.11823	-0.978374	7/160	3017,8331,8340,8347,8358,8970,79023	H2BC5,H2AC14,H2BC13,H2BC4,H3C2,H2BC11,NUP37
3_Member	Reactome Gene Sets	R-HSA-5617472	Activation of anterior HOX genes in hindbrain development during early embryogenesis	-3.02317	-0.906931	6/121	3017,8331,8340,8347,8358,8970	H2BC5,H2AC14,H2BC13,H2BC4,H3C2,H2BC11
3_Member	Reactome Gene Sets	R-HSA-5619507	Activation of HOX genes during differentiation	-3.02317	-0.906931	6/121	3017,8331,8340,8347,8358,8970	H2BC5,H2AC14,H2BC13,H2BC4,H3C2,H2BC11
3_Member	Reactome Gene Sets	R-HSA-9716542	Signaling by Rho GTPases, Miro GTPases and RHOBTB3	-2.89514	-0.801309	16/723	3017,3799,3895,8331,8340,8347,8358,8970,10254,23421,25963,55166,55288,64105,79023,220134	H2BC5,KIF5B,KTN1,H2AC14,H2BC13,H2BC4,H3C2,H2BC11,STAM2,ITGB3BP,TMEM87A,CENPQ,RHOT1,CENPK,NUP37,SKA1
3_Member	Reactome Gene Sets	R-HSA-157118	Signaling by NOTCH	-2.7701	-0.705792	8/236	892,3017,5870,8331,8340,8347,8358,8970	CCNC,H2BC5,RAB6A,H2AC14,H2BC13,H2BC4,H3C2,H2BC11
3_Member	KEGG Pathway	hsa05322	Systemic lupus erythematosus	-2.76244	-0.703559	6/136	3017,8331,8340,8347,8358,8970	H2BC5,H2AC14,H2BC13,H2BC4,H3C2,H2BC11
3_Member	KEGG Pathway	hsa04613	Neutrophil extracellular trap formation	-2.68803	-0.644536	7/190	837,3017,8331,8340,8347,8358,8970	CASP4,H2BC5,H2AC14,H2BC13,H2BC4,H3C2,H2BC11
3_Member	Reactome Gene Sets	R-HSA-8866654	E3 ubiquitin ligases ubiquitinate target proteins	-2.65702	-0.622092	4/59	3017,8340,8347,8970	H2BC5,H2BC13,H2BC4,H2BC11
3_Member	Reactome Gene Sets	R-HSA-194315	Signaling by Rho GTPases	-2.57312	-0.550715	15/707	3017,3799,3895,8331,8340,8347,8358,8970,10254,23421,25963,55166,64105,79023,220134	H2BC5,KIF5B,KTN1,H2AC14,H2BC13,H2BC4,H3C2,H2BC11,STAM2,ITGB3BP,TMEM87A,CENPQ,CENPK,NUP37,SKA1
3_Member	Reactome Gene Sets	R-HSA-8852135	Protein ubiquitination	-2.20084	-0.250355	4/79	3017,8340,8347,8970	H2BC5,H2BC13,H2BC4,H2BC11
4_Summary	Reactome Gene Sets	R-HSA-2262752	Cellular responses to stress	-8.54542	-4.91193	27/757	648,1054,1386,3006,3008,3017,4189,6144,6173,6782,7494,8331,8340,8347,8358,8894,8970,10111,11340,22926,25842,27230,51501,79023,144577,200916,493869	BMI1,CEBPG,ATF2,H1-2,H1-4,H2BC5,DNAJB9,RPL21,RPL36A,HSPA13,XBP1,H2AC14,H2BC13,H2BC4,H3C2,EIF2S2,H2BC11,RAD50,EXOSC8,ATF6,ASF1A,SERP1,HIKESHI,NUP37,KICS2,RPL22L1,GPX8
4_Member	Reactome Gene Sets	R-HSA-2262752	Cellular responses to stress	-8.54542	-4.91193	27/757	648,1054,1386,3006,3008,3017,4189,6144,6173,6782,7494,8331,8340,8347,8358,8894,8970,10111,11340,22926,25842,27230,51501,79023,144577,200916,493869	BMI1,CEBPG,ATF2,H1-2,H1-4,H2BC5,DNAJB9,RPL21,RPL36A,HSPA13,XBP1,H2AC14,H2BC13,H2BC4,H3C2,EIF2S2,H2BC11,RAD50,EXOSC8,ATF6,ASF1A,SERP1,HIKESHI,NUP37,KICS2,RPL22L1,GPX8
4_Member	Reactome Gene Sets	R-HSA-8953897	Cellular responses to stimuli	-8.37683	-4.87524	27/771	648,1054,1386,3006,3008,3017,4189,6144,6173,6782,7494,8331,8340,8347,8358,8894,8970,10111,11340,22926,25842,27230,51501,79023,144577,200916,493869	BMI1,CEBPG,ATF2,H1-2,H1-4,H2BC5,DNAJB9,RPL21,RPL36A,HSPA13,XBP1,H2AC14,H2BC13,H2BC4,H3C2,EIF2S2,H2BC11,RAD50,EXOSC8,ATF6,ASF1A,SERP1,HIKESHI,NUP37,KICS2,RPL22L1,GPX8
5_Summary	GO Biological Processes	GO:0034654	nucleobase-containing compound biosynthetic process	-6.52062	-3.65105	23/718	1386,2617,2966,4089,4331,5983,6880,6917,7494,7913,9111,9603,10111,10714,10927,11201,54700,54956,64841,79871,84524,201973,728340	ATF2,GARS1,GTF2H2,SMAD4,MNAT1,RFC3,TAF9,TCEA1,XBP1,DEK,NMI,NFE2L3,RAD50,POLD3,SPIN1,POLI,RRN3,PARP16,GNPNAT1,RPAP2,ZC3H8,PRIMPOL,GTF2H2C
5_Member	GO Biological Processes	GO:0034654	nucleobase-containing compound biosynthetic process	-6.52062	-3.65105	23/718	1386,2617,2966,4089,4331,5983,6880,6917,7494,7913,9111,9603,10111,10714,10927,11201,54700,54956,64841,79871,84524,201973,728340	ATF2,GARS1,GTF2H2,SMAD4,MNAT1,RFC3,TAF9,TCEA1,XBP1,DEK,NMI,NFE2L3,RAD50,POLD3,SPIN1,POLI,RRN3,PARP16,GNPNAT1,RPAP2,ZC3H8,PRIMPOL,GTF2H2C
5_Member	GO Biological Processes	GO:0032774	RNA biosynthetic process	-5.92748	-3.1371	16/399	1386,2966,4089,4331,6880,6917,7494,7913,9111,9603,10927,54700,79871,84524,201973,728340	ATF2,GTF2H2,SMAD4,MNAT1,TAF9,TCEA1,XBP1,DEK,NMI,NFE2L3,SPIN1,RRN3,RPAP2,ZC3H8,PRIMPOL,GTF2H2C
5_Member	GO Biological Processes	GO:0018130	heterocycle biosynthetic process	-5.81041	-3.04351	23/790	1386,2617,2966,4089,4331,5983,6880,6917,7494,7913,9111,9603,10111,10714,10927,11201,54700,54956,64841,79871,84524,201973,728340	ATF2,GARS1,GTF2H2,SMAD4,MNAT1,RFC3,TAF9,TCEA1,XBP1,DEK,NMI,NFE2L3,RAD50,POLD3,SPIN1,POLI,RRN3,PARP16,GNPNAT1,RPAP2,ZC3H8,PRIMPOL,GTF2H2C
5_Member	GO Biological Processes	GO:0019438	aromatic compound biosynthetic process	-5.728	-2.97237	23/799	1386,2617,2966,4089,4331,5983,6880,6917,7494,7913,9111,9603,10111,10714,10927,11201,54700,54956,64841,79871,84524,201973,728340	ATF2,GARS1,GTF2H2,SMAD4,MNAT1,RFC3,TAF9,TCEA1,XBP1,DEK,NMI,NFE2L3,RAD50,POLD3,SPIN1,POLI,RRN3,PARP16,GNPNAT1,RPAP2,ZC3H8,PRIMPOL,GTF2H2C
5_Member	GO Biological Processes	GO:0006351	transcription, DNA-templated	-5.42636	-2.73289	15/386	1386,2966,4089,4331,6880,6917,7494,7913,9111,9603,10927,54700,79871,84524,728340	ATF2,GTF2H2,SMAD4,MNAT1,TAF9,TCEA1,XBP1,DEK,NMI,NFE2L3,SPIN1,RRN3,RPAP2,ZC3H8,GTF2H2C
5_Member	GO Biological Processes	GO:0097659	nucleic acid-templated transcription	-5.39923	-2.72785	15/388	1386,2966,4089,4331,6880,6917,7494,7913,9111,9603,10927,54700,79871,84524,728340	ATF2,GTF2H2,SMAD4,MNAT1,TAF9,TCEA1,XBP1,DEK,NMI,NFE2L3,SPIN1,RRN3,RPAP2,ZC3H8,GTF2H2C
5_Member	GO Biological Processes	GO:0006366	transcription by RNA polymerase II	-4.26825	-1.83537	10/226	1386,2966,4331,6880,6917,7494,7913,9111,9603,84524	ATF2,GTF2H2,MNAT1,TAF9,TCEA1,XBP1,DEK,NMI,NFE2L3,ZC3H8
6_Summary	Reactome Gene Sets	R-HSA-8953854	Metabolism of RNA	-5.25128	-2.59479	20/673	2058,2966,4331,5356,6144,6173,9652,10286,10438,10605,11260,11340,23350,53938,54482,55759,79023,85313,199746,200916,1054,1386,3646,6880,10929,26829,55596,87178	EPRS1,GTF2H2,MNAT1,PLRG1,RPL21,RPL36A,TTC37,BCAS2,C1D,PAIP1,XPOT,EXOSC8,U2SURP,PPIL3,TRMT13,WDR12,NUP37,PPIL4,U2AF1L4,RPL22L1,CEBPG,ATF2,EIF3E,TAF9,SRSF8,RNU5E-1,ZCCHC8,PNPT1
6_Member	Reactome Gene Sets	R-HSA-8953854	Metabolism of RNA	-5.25128	-2.59479	20/673	2058,2966,4331,5356,6144,6173,9652,10286,10438,10605,11260,11340,23350,53938,54482,55759,79023,85313,199746,200916	EPRS1,GTF2H2,MNAT1,PLRG1,RPL21,RPL36A,TTC37,BCAS2,C1D,PAIP1,XPOT,EXOSC8,U2SURP,PPIL3,TRMT13,WDR12,NUP37,PPIL4,U2AF1L4,RPL22L1
6_Member	GO Biological Processes	GO:0016071	mRNA metabolic process	-2.76868	-0.705792	14/606	1054,1386,3646,5356,6880,9652,10286,10929,11340,26829,53938,55596,87178,199746	CEBPG,ATF2,EIF3E,PLRG1,TAF9,TTC37,BCAS2,SRSF8,EXOSC8,RNU5E-1,PPIL3,ZCCHC8,PNPT1,U2AF1L4
6_Member	Reactome Gene Sets	R-HSA-72163	mRNA Splicing - Major Pathway	-2.13189	-0.196069	6/183	5356,10286,23350,53938,85313,199746	PLRG1,BCAS2,U2SURP,PPIL3,PPIL4,U2AF1L4
6_Member	Reactome Gene Sets	R-HSA-72203	Processing of Capped Intron-Containing Pre-mRNA	-2.09826	-0.168214	7/244	5356,10286,23350,53938,79023,85313,199746	PLRG1,BCAS2,U2SURP,PPIL3,NUP37,PPIL4,U2AF1L4
6_Member	Reactome Gene Sets	R-HSA-72172	mRNA Splicing	-2.04521	-0.129886	6/191	5356,10286,23350,53938,85313,199746	PLRG1,BCAS2,U2SURP,PPIL3,PPIL4,U2AF1L4
7_Summary	GO Biological Processes	GO:1903008	organelle disassembly	-4.94124	-2.36541	7/82	3799,4528,23376,28985,79752,285636,493856,3925	KIF5B,MTIF2,UFL1,MCTS1,ZFAND1,RIMOC1,CISD2,STMN1
7_Member	GO Biological Processes	GO:1903008	organelle disassembly	-4.94124	-2.36541	7/82	3799,4528,23376,28985,79752,285636,493856	KIF5B,MTIF2,UFL1,MCTS1,ZFAND1,RIMOC1,CISD2
7_Member	GO Biological Processes	GO:0022411	cellular component disassembly	-2.24603	-0.286739	8/288	3799,3925,4528,23376,28985,79752,285636,493856	KIF5B,STMN1,MTIF2,UFL1,MCTS1,ZFAND1,RIMOC1,CISD2
8_Summary	WikiPathways	WP4946	DNA repair pathways, full network	-4.74609	-2.19874	8/121	2966,4331,5983,7398,10111,10714,11201,728340,6917,7341,6880,1386,54700,79023	GTF2H2,MNAT1,RFC3,USP1,RAD50,POLD3,POLI,GTF2H2C,TCEA1,SUMO1,TAF9,ATF2,RRN3,NUP37
8_Member	WikiPathways	WP4946	DNA repair pathways, full network	-4.74609	-2.19874	8/121	2966,4331,5983,7398,10111,10714,11201,728340	GTF2H2,MNAT1,RFC3,USP1,RAD50,POLD3,POLI,GTF2H2C
8_Member	WikiPathways	WP4753	Nucleotide excision repair	-4.27317	-1.83537	5/44	2966,4331,5983,10714,728340	GTF2H2,MNAT1,RFC3,POLD3,GTF2H2C
8_Member	KEGG Pathway	hsa03420	Nucleotide excision repair	-4.13303	-1.74059	5/47	2966,4331,5983,10714,728340	GTF2H2,MNAT1,RFC3,POLD3,GTF2H2C
8_Member	Reactome Gene Sets	R-HSA-6782210	Gap-filling DNA repair synthesis and ligation in TC-NER	-3.4608	-1.25084	5/65	2966,4331,5983,6917,10714	GTF2H2,MNAT1,RFC3,TCEA1,POLD3
8_Member	Reactome Gene Sets	R-HSA-6782135	Dual incision in TC-NER	-3.42985	-1.22864	5/66	2966,4331,5983,6917,10714	GTF2H2,MNAT1,RFC3,TCEA1,POLD3
8_Member	Reactome Gene Sets	R-HSA-5696398	Nucleotide Excision Repair	-3.21961	-1.05761	6/111	2966,4331,5983,6917,7341,10714	GTF2H2,MNAT1,RFC3,TCEA1,SUMO1,POLD3
8_Member	WikiPathways	WP405	Eukaryotic transcription initiation	-3.21277	-1.05361	4/42	2966,4331,6880,728340	GTF2H2,MNAT1,TAF9,GTF2H2C
8_Member	WikiPathways	WP5114	Nucleotide excision repair in xeroderma pigmentosum	-3.1471	-0.99631	5/76	2966,4331,5983,10714,728340	GTF2H2,MNAT1,RFC3,POLD3,GTF2H2C
8_Member	KEGG Pathway	hsa03022	Basal transcription factors	-3.098	-0.96567	4/45	2966,4331,6880,728340	GTF2H2,MNAT1,TAF9,GTF2H2C
8_Member	Reactome Gene Sets	R-HSA-6781827	Transcription-Coupled Nucleotide Excision Repair (TC-NER)	-3.07055	-0.941346	5/79	2966,4331,5983,6917,10714	GTF2H2,MNAT1,RFC3,TCEA1,POLD3
8_Member	Reactome Gene Sets	R-HSA-5696399	Global Genome Nucleotide Excision Repair (GG-NER)	-2.95017	-0.851254	5/84	2966,4331,5983,7341,10714	GTF2H2,MNAT1,RFC3,SUMO1,POLD3
8_Member	GO Biological Processes	GO:0006289	nucleotide-excision repair	-2.76978	-0.705792	4/55	2966,4331,10714,728340	GTF2H2,MNAT1,POLD3,GTF2H2C
8_Member	Reactome Gene Sets	R-HSA-6796648	TP53 Regulates Transcription of DNA Repair Genes	-2.50333	-0.487062	4/65	1386,2966,4331,6917	ATF2,GTF2H2,MNAT1,TCEA1
8_Member	Reactome Gene Sets	R-HSA-167172	Transcription of the HIV genome	-2.32215	-0.34653	4/73	2966,4331,6880,6917	GTF2H2,MNAT1,TAF9,TCEA1
8_Member	Reactome Gene Sets	R-HSA-5696400	Dual Incision in GG-NER	-2.18884	-0.240093	3/41	2966,5983,10714	GTF2H2,RFC3,POLD3
8_Member	Reactome Gene Sets	R-HSA-5696395	Formation of Incision Complex in GG-NER	-2.13113	-0.196069	3/43	2966,4331,7341	GTF2H2,MNAT1,SUMO1
8_Member	Reactome Gene Sets	R-HSA-674695	RNA Polymerase II Pre-transcription Events	-2.10777	-0.176061	4/84	2966,4331,6880,6917	GTF2H2,MNAT1,TAF9,TCEA1
8_Member	Reactome Gene Sets	R-HSA-167169	HIV Transcription Elongation	-2.05004	-0.133105	3/46	2966,4331,6917	GTF2H2,MNAT1,TCEA1
8_Member	Reactome Gene Sets	R-HSA-167200	Formation of HIV-1 elongation complex containing HIV-1 Tat	-2.05004	-0.133105	3/46	2966,4331,6917	GTF2H2,MNAT1,TCEA1
8_Member	Reactome Gene Sets	R-HSA-167246	Tat-mediated elongation of the HIV-1 transcript	-2.05004	-0.133105	3/46	2966,4331,6917	GTF2H2,MNAT1,TCEA1
8_Member	Reactome Gene Sets	R-HSA-167161	HIV Transcription Initiation	-2.02433	-0.127895	3/47	2966,4331,6880	GTF2H2,MNAT1,TAF9
8_Member	Reactome Gene Sets	R-HSA-167162	RNA Polymerase II HIV Promoter Escape	-2.02433	-0.127895	3/47	2966,4331,6880	GTF2H2,MNAT1,TAF9
8_Member	Reactome Gene Sets	R-HSA-73762	RNA Polymerase I Transcription Initiation	-2.02433	-0.127895	3/47	2966,4331,54700	GTF2H2,MNAT1,RRN3
8_Member	Reactome Gene Sets	R-HSA-73776	RNA Polymerase II Promoter Escape	-2.02433	-0.127895	3/47	2966,4331,6880	GTF2H2,MNAT1,TAF9
8_Member	Reactome Gene Sets	R-HSA-73779	RNA Polymerase II Transcription Pre-Initiation And Promoter Opening	-2.02433	-0.127895	3/47	2966,4331,6880	GTF2H2,MNAT1,TAF9
8_Member	Reactome Gene Sets	R-HSA-75953	RNA Polymerase II Transcription Initiation	-2.02433	-0.127895	3/47	2966,4331,6880	GTF2H2,MNAT1,TAF9
8_Member	Reactome Gene Sets	R-HSA-76042	RNA Polymerase II Transcription Initiation And Promoter Clearance	-2.02433	-0.127895	3/47	2966,4331,6880	GTF2H2,MNAT1,TAF9
8_Member	Reactome Gene Sets	R-HSA-162599	Late Phase of HIV Life Cycle	-2.01326	-0.12142	5/139	2966,4331,6880,6917,79023	GTF2H2,MNAT1,TAF9,TCEA1,NUP37
9_Summary	GO Biological Processes	GO:2001020	regulation of response to DNA damage stimulus	-4.68156	-2.14141	11/246	1054,6880,7398,7913,8089,9521,10635,23514,54780,57223,79968,4189,7494,22926,23376,29761,80824,87178,3006,3008,5983,10111,140609	CEBPG,TAF9,USP1,DEK,YEATS4,EEF1E1,RAD51AP1,SPIDR,NSMCE4A,PPP4R3B,WDR76,DNAJB9,XBP1,ATF6,UFL1,USP25,DUSP16,PNPT1,H1-2,H1-4,RFC3,RAD50,NEK7
9_Member	GO Biological Processes	GO:2001020	regulation of response to DNA damage stimulus	-4.68156	-2.14141	11/246	1054,6880,7398,7913,8089,9521,10635,23514,54780,57223,79968	CEBPG,TAF9,USP1,DEK,YEATS4,EEF1E1,RAD51AP1,SPIDR,NSMCE4A,PPP4R3B,WDR76
9_Member	GO Biological Processes	GO:0080135	regulation of cellular response to stress	-4.03438	-1.68333	18/692	1054,4189,6880,7398,7494,7913,8089,9521,10635,22926,23376,23514,29761,54780,57223,79968,80824,87178	CEBPG,DNAJB9,TAF9,USP1,XBP1,DEK,YEATS4,EEF1E1,RAD51AP1,ATF6,UFL1,SPIDR,USP25,NSMCE4A,PPP4R3B,WDR76,DUSP16,PNPT1
9_Member	GO Biological Processes	GO:0051052	regulation of DNA metabolic process	-3.36729	-1.18792	12/404	1054,3006,3008,5983,7398,7913,8089,10111,10635,23514,57223,140609	CEBPG,H1-2,H1-4,RFC3,USP1,DEK,YEATS4,RAD50,RAD51AP1,SPIDR,PPP4R3B,NEK7
9_Member	GO Biological Processes	GO:0006282	regulation of DNA repair	-3.25013	-1.07954	7/152	1054,7398,7913,8089,10635,23514,57223	CEBPG,USP1,DEK,YEATS4,RAD51AP1,SPIDR,PPP4R3B
9_Member	GO Biological Processes	GO:2001022	positive regulation of response to DNA damage stimulus	-2.87954	-0.790529	6/129	1054,8089,9521,10635,23514,54780	CEBPG,YEATS4,EEF1E1,RAD51AP1,SPIDR,NSMCE4A
9_Member	GO Biological Processes	GO:2000779	regulation of double-strand break repair	-2.43634	-0.432075	5/110	7913,8089,10635,23514,57223	DEK,YEATS4,RAD51AP1,SPIDR,PPP4R3B
9_Member	GO Biological Processes	GO:0051054	positive regulation of DNA metabolic process	-2.22328	-0.26576	7/231	1054,5983,8089,10111,10635,23514,140609	CEBPG,RFC3,YEATS4,RAD50,RAD51AP1,SPIDR,NEK7
10_Summary	Reactome Gene Sets	R-HSA-68877	Mitotic Prometaphase	-4.64543	-2.12323	10/204	9126,10733,23244,23421,55166,64105,79023,80184,140609,220134,7341,55355,9493	SMC3,PLK4,PDS5A,ITGB3BP,CENPQ,CENPK,NUP37,CEP290,NEK7,SKA1,SUMO1,HJURP,KIF23
10_Member	Reactome Gene Sets	R-HSA-68877	Mitotic Prometaphase	-4.64543	-2.12323	10/204	9126,10733,23244,23421,55166,64105,79023,80184,140609,220134	SMC3,PLK4,PDS5A,ITGB3BP,CENPQ,CENPK,NUP37,CEP290,NEK7,SKA1
10_Member	CORUM	CORUM:7394	CENP-H-I complex	-3.9101	-1.58461	3/11	23421,55166,64105	ITGB3BP,CENPQ,CENPK
10_Member	CORUM	CORUM:1179	CENP-A NAC-CAD complex	-3.78815	-1.48071	3/12	23421,55166,64105	ITGB3BP,CENPQ,CENPK
10_Member	Reactome Gene Sets	R-HSA-2500257	Resolution of Sister Chromatid Cohesion	-3.74488	-1.46265	7/126	9126,23244,23421,55166,64105,79023,220134	SMC3,PDS5A,ITGB3BP,CENPQ,CENPK,NUP37,SKA1
10_Member	Reactome Gene Sets	R-HSA-9648025	EML4 and NUDC in mitotic spindle formation	-3.09933	-0.96567	6/117	23421,55166,64105,79023,140609,220134	ITGB3BP,CENPQ,CENPK,NUP37,NEK7,SKA1
10_Member	Reactome Gene Sets	R-HSA-68882	Mitotic Anaphase	-2.7701	-0.705792	8/236	7341,9126,23244,23421,55166,64105,79023,220134	SUMO1,SMC3,PDS5A,ITGB3BP,CENPQ,CENPK,NUP37,SKA1
10_Member	Reactome Gene Sets	R-HSA-2555396	Mitotic Metaphase and Anaphase	-2.75861	-0.70196	8/237	7341,9126,23244,23421,55166,64105,79023,220134	SUMO1,SMC3,PDS5A,ITGB3BP,CENPQ,CENPK,NUP37,SKA1
10_Member	GO Biological Processes	GO:0034508	centromere complex assembly	-2.70908	-0.656865	3/27	23421,55355,64105	ITGB3BP,HJURP,CENPK
10_Member	Reactome Gene Sets	R-HSA-141424	Amplification of signal from the kinetochores	-2.69252	-0.646862	5/96	23421,55166,64105,79023,220134	ITGB3BP,CENPQ,CENPK,NUP37,SKA1
10_Member	Reactome Gene Sets	R-HSA-141444	Amplification of signal from unattached kinetochores via a MAD2 inhibitory signal	-2.69252	-0.646862	5/96	23421,55166,64105,79023,220134	ITGB3BP,CENPQ,CENPK,NUP37,SKA1
10_Member	Reactome Gene Sets	R-HSA-2467813	Separation of Sister Chromatids	-2.67518	-0.63385	7/191	9126,23244,23421,55166,64105,79023,220134	SMC3,PDS5A,ITGB3BP,CENPQ,CENPK,NUP37,SKA1
10_Member	Reactome Gene Sets	R-HSA-69618	Mitotic Spindle Checkpoint	-2.38653	-0.405335	5/113	23421,55166,64105,79023,220134	ITGB3BP,CENPQ,CENPK,NUP37,SKA1
10_Member	GO Biological Processes	GO:0007059	chromosome segregation	-2.29065	-0.320538	8/283	9126,9493,23244,55166,55355,64105,79023,220134	SMC3,KIF23,PDS5A,CENPQ,HJURP,CENPK,NUP37,SKA1
10_Member	Reactome Gene Sets	R-HSA-5663220	RHO GTPases Activate Formins	-2.00068	-0.111874	5/140	23421,55166,64105,79023,220134	ITGB3BP,CENPQ,CENPK,NUP37,SKA1
11_Summary	GO Biological Processes	GO:0006413	translational initiation	-4.58156	-2.07997	6/63	3646,4528,8894,10605,28985,83939,1978,2058,10600,11340,27230,63899,87178,94101	EIF3E,MTIF2,EIF2S2,PAIP1,MCTS1,EIF2A,EIF4EBP1,EPRS1,USP16,EXOSC8,SERP1,NSUN3,PNPT1,ORMDL1
11_Member	GO Biological Processes	GO:0006413	translational initiation	-4.58156	-2.07997	6/63	3646,4528,8894,10605,28985,83939	EIF3E,MTIF2,EIF2S2,PAIP1,MCTS1,EIF2A
11_Member	WikiPathways	WP107	Translation factors	-2.82972	-0.754876	4/53	1978,3646,8894,10605	EIF4EBP1,EIF3E,EIF2S2,PAIP1
11_Member	GO Biological Processes	GO:0034248	regulation of cellular amide metabolic process	-2.39779	-0.412833	12/527	1978,2058,3646,4528,10600,10605,11340,27230,63899,83939,87178,94101	EIF4EBP1,EPRS1,EIF3E,MTIF2,USP16,PAIP1,EXOSC8,SERP1,NSUN3,EIF2A,PNPT1,ORMDL1
11_Member	GO Biological Processes	GO:0006417	regulation of translation	-2.36852	-0.391047	11/464	1978,2058,3646,4528,10600,10605,11340,27230,63899,83939,87178	EIF4EBP1,EPRS1,EIF3E,MTIF2,USP16,PAIP1,EXOSC8,SERP1,NSUN3,EIF2A,PNPT1
11_Member	GO Biological Processes	GO:0006446	regulation of translational initiation	-2.1628	-0.217747	4/81	1978,3646,4528,10605	EIF4EBP1,EIF3E,MTIF2,PAIP1
12_Summary	Reactome Gene Sets	R-HSA-381119	Unfolded Protein Response (UPR)	-4.55213	-2.0567	7/94	1054,4189,7494,8894,11340,22926,27230	CEBPG,DNAJB9,XBP1,EIF2S2,EXOSC8,ATF6,SERP1
12_Member	Reactome Gene Sets	R-HSA-381119	Unfolded Protein Response (UPR)	-4.55213	-2.0567	7/94	1054,4189,7494,8894,11340,22926,27230	CEBPG,DNAJB9,XBP1,EIF2S2,EXOSC8,ATF6,SERP1
12_Member	Reactome Gene Sets	R-HSA-381042	PERK regulates gene expression	-3.67434	-1.4032	4/32	1054,8894,11340,22926	CEBPG,EIF2S2,EXOSC8,ATF6
12_Member	Reactome Gene Sets	R-HSA-380994	ATF4 activates genes in response to endoplasmic reticulum stress	-2.70908	-0.656865	3/27	1054,11340,22926	CEBPG,EXOSC8,ATF6
13_Summary	GO Biological Processes	GO:0022613	ribonucleoprotein complex biogenesis	-4.10885	-1.72595	14/444	6880,8894,10438,11340,26829,28985,51001,51187,54700,55003,55759,63899,83939,196074,9652,87178,6144,6173,200916	TAF9,EIF2S2,C1D,EXOSC8,RNU5E-1,MCTS1,MTERF3,RSL24D1,RRN3,PAK1IP1,WDR12,NSUN3,EIF2A,METTL15,TTC37,PNPT1,RPL21,RPL36A,RPL22L1
13_Member	GO Biological Processes	GO:0022613	ribonucleoprotein complex biogenesis	-4.10885	-1.72595	14/444	6880,8894,10438,11340,26829,28985,51001,51187,54700,55003,55759,63899,83939,196074	TAF9,EIF2S2,C1D,EXOSC8,RNU5E-1,MCTS1,MTERF3,RSL24D1,RRN3,PAK1IP1,WDR12,NSUN3,EIF2A,METTL15
13_Member	GO Biological Processes	GO:0042254	ribosome biogenesis	-3.35484	-1.17842	10/293	10438,11340,51001,51187,54700,55003,55759,63899,83939,196074	C1D,EXOSC8,MTERF3,RSL24D1,RRN3,PAK1IP1,WDR12,NSUN3,EIF2A,METTL15
13_Member	GO Biological Processes	GO:0000460	maturation of 5.8S rRNA	-2.38298	-0.403652	3/35	10438,11340,55759	C1D,EXOSC8,WDR12
13_Member	KEGG Pathway	hsa03018	RNA degradation	-2.20084	-0.250355	4/79	9652,10438,11340,87178	TTC37,C1D,EXOSC8,PNPT1
13_Member	Reactome Gene Sets	R-HSA-6791226	Major pathway of rRNA processing in the nucleolus and cytosol	-2.12078	-0.187398	6/184	6144,6173,10438,11340,55759,200916	RPL21,RPL36A,C1D,EXOSC8,WDR12,RPL22L1
13_Member	Reactome Gene Sets	R-HSA-8868773	rRNA processing in the nucleus and cytosol	-2.01392	-0.12142	6/194	6144,6173,10438,11340,55759,200916	RPL21,RPL36A,C1D,EXOSC8,WDR12,RPL22L1
14_Summary	GO Biological Processes	GO:0042276	error-prone translesion synthesis	-4.04542	-1.6855	3/10	10714,11201,201973,5983,7398,3925,9126,10733,10111,4673,5000,55345,4331,23244	POLD3,POLI,PRIMPOL,RFC3,USP1,STMN1,SMC3,PLK4,RAD50,NAP1L1,ORC4,ZGRF1,MNAT1,PDS5A
14_Member	GO Biological Processes	GO:0042276	error-prone translesion synthesis	-4.04542	-1.6855	3/10	10714,11201,201973	POLD3,POLI,PRIMPOL
14_Member	GO Biological Processes	GO:0000731	DNA synthesis involved in DNA repair	-3.42611	-1.22864	4/37	5983,10714,11201,201973	RFC3,POLD3,POLI,PRIMPOL
14_Member	Reactome Gene Sets	R-HSA-73893	DNA Damage Bypass	-2.99151	-0.885377	4/48	5983,7398,10714,11201	RFC3,USP1,POLD3,POLI
14_Member	GO Biological Processes	GO:0019985	translesion synthesis	-2.8601	-0.780213	3/24	10714,11201,201973	POLD3,POLI,PRIMPOL
14_Member	WikiPathways	WP2446	Retinoblastoma gene in cancer	-2.85973	-0.780213	5/88	3925,5983,9126,10714,10733	STMN1,RFC3,SMC3,POLD3,PLK4
14_Member	GO Biological Processes	GO:0071897	DNA biosynthetic process	-2.81629	-0.743765	5/90	5983,10111,10714,11201,201973	RFC3,RAD50,POLD3,POLI,PRIMPOL
14_Member	GO Biological Processes	GO:0006260	DNA replication	-2.62467	-0.593952	7/195	4673,5000,5983,10714,11201,55345,201973	NAP1L1,ORC4,RFC3,POLD3,POLI,ZGRF1,PRIMPOL
14_Member	Reactome Gene Sets	R-HSA-110314	Recognition of DNA damage by PCNA-containing replication complex	-2.57557	-0.551108	3/30	5983,7398,10714	RFC3,USP1,POLD3
14_Member	Reactome Gene Sets	R-HSA-5656169	Termination of translesion DNA synthesis	-2.49454	-0.480293	3/32	5983,10714,11201	RFC3,POLD3,POLI
14_Member	GO Biological Processes	GO:0006301	postreplication repair	-2.41894	-0.424442	3/34	10714,11201,201973	POLD3,POLI,PRIMPOL
14_Member	Reactome Gene Sets	R-HSA-69242	S Phase	-2.39798	-0.412833	6/161	4331,5000,5983,9126,10714,23244	MNAT1,ORC4,RFC3,SMC3,POLD3,PDS5A
14_Member	Reactome Gene Sets	R-HSA-110313	Translesion synthesis by Y family DNA polymerases bypasses lesions on DNA template	-2.2498	-0.288722	3/39	5983,10714,11201	RFC3,POLD3,POLI
14_Member	WikiPathways	WP466	DNA replication	-2.1596	-0.217747	3/42	5000,5983,10714	ORC4,RFC3,POLD3
14_Member	GO Biological Processes	GO:0006261	DNA-dependent DNA replication	-2.13189	-0.196069	5/130	5000,5983,10714,55345,201973	ORC4,RFC3,POLD3,ZGRF1,PRIMPOL
15_Summary	WikiPathways	WP3613	Photodynamic therapy-induced unfolded protein response	-3.84499	-1.53173	4/29	4189,7494,22926,83939,23376,837,27230,51465,54956,81542,29761,6782,5504	DNAJB9,XBP1,ATF6,EIF2A,UFL1,CASP4,SERP1,UBE2J1,PARP16,TMX1,USP25,HSPA13,PPP1R2
15_Member	WikiPathways	WP3613	Photodynamic therapy-induced unfolded protein response	-3.84499	-1.53173	4/29	4189,7494,22926,83939	DNAJB9,XBP1,ATF6,EIF2A
15_Member	GO Biological Processes	GO:1900101	regulation of endoplasmic reticulum unfolded protein response	-3.786	-1.48071	4/30	4189,7494,22926,23376	DNAJB9,XBP1,ATF6,UFL1
15_Member	GO Biological Processes	GO:0034976	response to endoplasmic reticulum stress	-3.67061	-1.40311	9/218	837,4189,7494,22926,23376,27230,51465,54956,81542	CASP4,DNAJB9,XBP1,ATF6,UFL1,SERP1,UBE2J1,PARP16,TMX1
15_Member	GO Biological Processes	GO:1903573	negative regulation of response to endoplasmic reticulum stress	-3.13528	-0.987249	4/44	4189,7494,23376,29761	DNAJB9,XBP1,UFL1,USP25
15_Member	GO Biological Processes	GO:0034620	cellular response to unfolded protein	-3.1212	-0.978632	5/77	6782,7494,22926,27230,54956	HSPA13,XBP1,ATF6,SERP1,PARP16
15_Member	GO Biological Processes	GO:0006986	response to unfolded protein	-3.02317	-0.906931	6/121	4189,6782,7494,22926,27230,54956	DNAJB9,HSPA13,XBP1,ATF6,SERP1,PARP16
15_Member	GO Biological Processes	GO:1905897	regulation of response to endoplasmic reticulum stress	-2.99729	-0.888655	5/82	4189,7494,22926,23376,29761	DNAJB9,XBP1,ATF6,UFL1,USP25
15_Member	GO Biological Processes	GO:0030968	endoplasmic reticulum unfolded protein response	-2.86066	-0.780213	4/52	7494,22926,27230,54956	XBP1,ATF6,SERP1,PARP16
15_Member	GO Biological Processes	GO:0035967	cellular response to topologically incorrect protein	-2.69252	-0.646862	5/96	6782,7494,22926,27230,54956	HSPA13,XBP1,ATF6,SERP1,PARP16
15_Member	GO Biological Processes	GO:0035966	response to topologically incorrect protein	-2.66779	-0.628605	6/142	4189,6782,7494,22926,27230,54956	DNAJB9,HSPA13,XBP1,ATF6,SERP1,PARP16
15_Member	WikiPathways	WP4861	Endoplasmic reticulum stress response in coronavirus infection	-2.02433	-0.127895	3/47	5504,7494,22926	PPP1R2,XBP1,ATF6
16_Summary	Reactome Gene Sets	R-HSA-68884	Mitotic Telophase/Cytokinesis	-3.67719	-1.4032	3/13	9126,9493,23244,3925,55857,114327,140609,153241,1386,1978,4331,8089,10600,10733,51175,64105,220134,1070,3799,3895,5870,10190,55288,63915,23421,79023,151011	SMC3,KIF23,PDS5A,STMN1,KIZ,EFHC1,NEK7,CEP120,ATF2,EIF4EBP1,MNAT1,YEATS4,USP16,PLK4,TUBE1,CENPK,SKA1,CETN3,KIF5B,KTN1,RAB6A,TXNDC9,RHOT1,BLOC1S5,ITGB3BP,NUP37,SEPTIN10
16_Member	Reactome Gene Sets	R-HSA-68884	Mitotic Telophase/Cytokinesis	-3.67719	-1.4032	3/13	9126,9493,23244	SMC3,KIF23,PDS5A
16_Member	GO Biological Processes	GO:0007051	spindle organization	-3.23318	-1.06834	7/153	3925,9126,9493,55857,114327,140609,153241	STMN1,SMC3,KIF23,KIZ,EFHC1,NEK7,CEP120
16_Member	GO Biological Processes	GO:0000278	mitotic cell cycle	-2.89029	-0.798874	14/588	1386,1978,3925,4331,8089,9126,9493,10600,10733,23244,51175,64105,114327,220134	ATF2,EIF4EBP1,STMN1,MNAT1,YEATS4,SMC3,KIF23,USP16,PLK4,PDS5A,TUBE1,CENPK,EFHC1,SKA1
16_Member	GO Biological Processes	GO:0007017	microtubule-based process	-2.6595	-0.622446	16/763	1070,3799,3895,3925,5870,9126,9493,10190,10733,51175,55288,55857,63915,114327,140609,153241	CETN3,KIF5B,KTN1,STMN1,RAB6A,SMC3,KIF23,TXNDC9,PLK4,TUBE1,RHOT1,KIZ,BLOC1S5,EFHC1,NEK7,CEP120
16_Member	GO Biological Processes	GO:0051301	cell division	-2.1831	-0.236088	11/492	1070,3925,9126,9493,10600,23244,23421,79023,114327,151011,220134	CETN3,STMN1,SMC3,KIF23,USP16,PDS5A,ITGB3BP,NUP37,EFHC1,SEPTIN10,SKA1
16_Member	GO Biological Processes	GO:0000226	microtubule cytoskeleton organization	-2.00749	-0.117175	11/521	1070,3925,9126,9493,10190,10733,51175,55857,114327,140609,153241	CETN3,STMN1,SMC3,KIF23,TXNDC9,PLK4,TUBE1,KIZ,EFHC1,NEK7,CEP120
17_Summary	Reactome Gene Sets	R-HSA-9633012	Response of EIF2AK4 (GCN2) to amino acid deficiency	-3.43824	-1.23143	6/101	1054,1386,6144,6173,8894,200916,144577,1978,3646,28985,2058,9521	CEBPG,ATF2,RPL21,RPL36A,EIF2S2,RPL22L1,KICS2,EIF4EBP1,EIF3E,MCTS1,EPRS1,EEF1E1
17_Member	Reactome Gene Sets	R-HSA-9633012	Response of EIF2AK4 (GCN2) to amino acid deficiency	-3.43824	-1.23143	6/101	1054,1386,6144,6173,8894,200916	CEBPG,ATF2,RPL21,RPL36A,EIF2S2,RPL22L1
17_Member	Reactome Gene Sets	R-HSA-9711097	Cellular response to starvation	-3.18315	-1.02958	7/156	1054,1386,6144,6173,8894,144577,200916	CEBPG,ATF2,RPL21,RPL36A,EIF2S2,KICS2,RPL22L1
17_Member	Reactome Gene Sets	R-HSA-72613	Eukaryotic Translation Initiation	-3.06087	-0.936899	6/119	1978,3646,6144,6173,8894,200916	EIF4EBP1,EIF3E,RPL21,RPL36A,EIF2S2,RPL22L1
17_Member	Reactome Gene Sets	R-HSA-72737	Cap-dependent Translation Initiation	-3.06087	-0.936899	6/119	1978,3646,6144,6173,8894,200916	EIF4EBP1,EIF3E,RPL21,RPL36A,EIF2S2,RPL22L1
17_Member	Reactome Gene Sets	R-HSA-156827	L13a-mediated translational silencing of Ceruloplasmin expression	-2.41955	-0.424442	5/111	3646,6144,6173,8894,200916	EIF3E,RPL21,RPL36A,EIF2S2,RPL22L1
17_Member	GO Biological Processes	GO:0002181	cytoplasmic translation	-2.40295	-0.414204	5/112	6144,6173,8894,28985,200916	RPL21,RPL36A,EIF2S2,MCTS1,RPL22L1
17_Member	Reactome Gene Sets	R-HSA-72706	GTP hydrolysis and joining of the 60S ribosomal subunit	-2.40295	-0.414204	5/112	3646,6144,6173,8894,200916	EIF3E,RPL21,RPL36A,EIF2S2,RPL22L1
17_Member	Reactome Gene Sets	R-HSA-2408522	Selenoamino acid metabolism	-2.30699	-0.335057	5/118	2058,6144,6173,9521,200916	EPRS1,RPL21,RPL36A,EEF1E1,RPL22L1
18_Summary	CORUM	CORUM:929	CEN complex	-3.42611	-1.22864	4/37	648,9493,11335,64105	BMI1,KIF23,CBX3,CENPK
18_Member	CORUM	CORUM:929	CEN complex	-3.42611	-1.22864	4/37	648,9493,11335,64105	BMI1,KIF23,CBX3,CENPK
19_Summary	Reactome Gene Sets	R-HSA-5685942	HDR through Homologous Recombination (HRR)	-3.39944	-1.20504	5/67	5983,10111,10635,10714,23514,3006,3008,8089,7398	RFC3,RAD50,RAD51AP1,POLD3,SPIDR,H1-2,H1-4,YEATS4,USP1
19_Member	Reactome Gene Sets	R-HSA-5685942	HDR through Homologous Recombination (HRR)	-3.39944	-1.20504	5/67	5983,10111,10635,10714,23514	RFC3,RAD50,RAD51AP1,POLD3,SPIDR
19_Member	GO Biological Processes	GO:0022616	DNA strand elongation	-3.09751	-0.96567	3/20	5983,10111,10714	RFC3,RAD50,POLD3
19_Member	GO Biological Processes	GO:0000018	regulation of DNA recombination	-2.84531	-0.768134	6/131	3006,3008,8089,10111,10635,23514	H1-2,H1-4,YEATS4,RAD50,RAD51AP1,SPIDR
19_Member	Reactome Gene Sets	R-HSA-5693568	Resolution of D-loop Structures through Holliday Junction Intermediates	-2.4561	-0.449864	3/33	10111,10635,23514	RAD50,RAD51AP1,SPIDR
19_Member	Reactome Gene Sets	R-HSA-5693537	Resolution of D-Loop Structures	-2.41894	-0.424442	3/34	10111,10635,23514	RAD50,RAD51AP1,SPIDR
19_Member	Reactome Gene Sets	R-HSA-5693579	Homologous DNA Pairing and Strand Exchange	-2.1596	-0.217747	3/42	5983,10111,10635	RFC3,RAD50,RAD51AP1
19_Member	Canonical Pathways	M1	PID FANCONI PATHWAY	-2.02433	-0.127895	3/47	5983,7398,10111	RFC3,USP1,RAD50
20_Summary	Reactome Gene Sets	R-HSA-2559584	Formation of Senescence-Associated Heterochromatin Foci (SAHF)	-3.39432	-1.2042	3/16	3006,3008,25842,1312,5870,10196,54482,63899,196074,399818	H1-2,H1-4,ASF1A,COMT,RAB6A,PRMT3,TRMT13,NSUN3,METTL15,EEF1AKMT2
20_Member	Reactome Gene Sets	R-HSA-2559584	Formation of Senescence-Associated Heterochromatin Foci (SAHF)	-3.39432	-1.2042	3/16	3006,3008,25842	H1-2,H1-4,ASF1A
20_Member	GO Biological Processes	GO:0032259	methylation	-2.62866	-0.595839	9/306	1312,3006,3008,5870,10196,54482,63899,196074,399818	COMT,H1-2,H1-4,RAB6A,PRMT3,TRMT13,NSUN3,METTL15,EEF1AKMT2
20_Member	GO Biological Processes	GO:0043414	macromolecule methylation	-2.53109	-0.51278	8/258	3006,3008,5870,10196,54482,63899,196074,399818	H1-2,H1-4,RAB6A,PRMT3,TRMT13,NSUN3,METTL15,EEF1AKMT2
20_Member	GO Biological Processes	GO:0006479	protein methylation	-2.02596	-0.127895	5/138	3006,3008,5870,10196,399818	H1-2,H1-4,RAB6A,PRMT3,EEF1AKMT2
20_Member	GO Biological Processes	GO:0008213	protein alkylation	-2.02596	-0.127895	5/138	3006,3008,5870,10196,399818	H1-2,H1-4,RAB6A,PRMT3,EEF1AKMT2
