# Supplementary material for: The cGAS-STING pathway is a master regulator of OCT4 expression in persistent sarcoma cells and enhances cellular immunotherapy with NK and CIK lymphocytes
Source: Research Square preprint supplement (doi:10.21203/rs.3.rs-6463944/v1), 2025-05-02
Supplement: Supplementary file 3 [file e41a6c2f9d7d7e335517cb48.xlsx]

## Sheet: All
Supplementary Table S6. Median expression, fold increase (log2FC), p value, and adjusted p-value of genes with median expression >1 as calculated by bioinformatic analysis of RNA-Seq data from treated cell llines and xenografts
				Median expression												log2FC									p-value									adjusted p-avalue
				DMR				HT-1080				S018				DMR			HT-1080			S018			DMR			HT-1080			S018			DMR			HT-1080			S018
Ensembl ID	Symbol	Adjusted p-value < 0.05	Median > 1	NT	OL	TR	CB	NT	OL	TR	CB	NT	OL	TR	CB	OL vs NT	TR vs NT	CB vs NT	OL vs NT	TR vs NT	CB vs NT	OL vs NT	TR vs NT	CB vs NT	OL vs NT	TR vs NT	CB vs NT	OL vs NT	TR vs NT	CB vs NT	OL vs NT	TR vs NT	CB vs NT	OL vs NT	TR vs NT	CB vs NT	OL vs NT	TR vs NT	CB vs NT	OL vs NT	TR vs NT	CB vs NT
ENSG00000112175.8	BMP5	5	4	0	0.007205	0.003771	0.002736	0.004285	0.0041255	0	0	7.34282	4.80642	4.38785	1.07791	18.25	17.32	17.01	-0.11	-17.89	-15.54	-0.83	-0.66	-2.21	8.31022e-07	3.94712e-06	6.94678e-06	0.974675	1.59398e-06	3.06203e-05	0.805364	0.844307	0.509808	0.00318931	0.00446304	0.00288914	1	0.00538532	0.0167422	1	1	0.888274
ENSG00000248307.6	LINC00616	5	4	0	0.0256215	0.016416	0.005038	0	0.0105995	0.009078	0	11.5022	12.3395	8.84858	6.17926	17.91	17.28	15.66	17.04	16.82	0	-0.11	-0.29	-0.34	1.63197e-07	6.33094e-07	1.68089e-05	9.93336e-07	1.73767e-06	1	0.970862	0.92381	0.912323	0.000688954	0.00122716	0.00535815	0.00366088	0.00538532	1	1	1	0.98859
ENSG00000029534.21	ANK1	5	3	0.055079	0.18849	0.342153	0.446472	0.0136455	0.0769355	0.056803	0.0976525	0.718244	1.75952	4.68674	5.63462	1.91	2.75	3.26	2.5	1.98	2.84	1.11	2.85	3.16	0.00486228	4.60184e-05	1.29607e-06	0.000392482	0.00522976	0.000109745	0.0923863	1.59956e-05	1.77139e-06	1	0.0346299	0.000844966	0.507285	1	0.0458179	1	0.0153456	0.000762963
ENSG00000281383.1	FP671120.7	5	2	0.077576	0.0309915	0	0.0583545	0	1.35622	0.491518	0.151849	0.0662675	0	0.496696	9.80294	-1.07	-18.52	-0.15	23.31	21.8	20.16	-18.46	3.26	7.78	0.756629	5.33613e-07	0.966129	2.11073e-10	2.86778e-09	6.6542e-08	5.93532e-07	0.339108	0.02226	1	0.0011139	1	2.33369e-06	1.86184e-05	0.000128982	0.00775568	1	NA
ENSG00000107796.13	ACTA2	4	12	7.97557	13.4294	28.7074	42.4491	17.8571	33.1459	32.2522	39.5995	1.33503	2.45076	4.94447	5.68244	0.89	1.97	2.67	0.93	0.83	1.11	0.74	2.09	2.42	0.0609057	3.40924e-05	1.80241e-08	0.0504511	0.0794586	0.0188339	0.124608	1.42612e-05	4.71291e-07	1	0.0289114	3.10556e-05	1	1	0.824757	1	0.0150499	0.0003089
ENSG00000137486.17	ARRB1	4	12	1.2425	1.35265	2.38617	2.18642	1.9238	2.25566	1.96632	2.52439	1.90398	2.71449	3.9847	3.60507	0.28	1.06	1.07	0.27	0.02	0.34	0.31	1.17	1.19	0.258215	1.46482e-05	1.32189e-05	0.27284	0.939166	0.174914	0.202979	1.50179e-06	8.62314e-07	1	0.0128228	0.00455522	1	1	1	1	0.00264141	0.000448255
ENSG00000132274.16	TRIM22	4	12	4.47841	4.65426	11.674	11.4027	28.3594	39.3402	35.7949	43.3069	5.64269	9.87978	12.2965	12.261	0.23	1.5	1.59	0.49	0.33	0.55	0.64	1.25	1.41	0.475177	3.7055e-06	9.9952e-07	0.124438	0.306522	0.0875477	0.0480625	0.000110928	1.26417e-05	1	0.004372	0.000732474	1	1	1	1	0.0441744	0.00280255
ENSG00000227568.1	SNX18P26	4	11	0.876668	1.34205	4.16665	4.64313	11.043	16.7649	18.8156	22.6099	1.11429	2.41601	4.64669	3.96098	0.79	2.37	2.65	0.62	0.73	0.98	0.98	2.26	2.12	0.129008	4.50888e-06	2.83058e-07	0.216337	0.145468	0.0519597	0.056554	1.09792e-05	3.75781e-05	1	0.0048943	0.00031036	1	1	1	1	0.0122678	0.0056649
ENSG00000274585.1	RNU2-1	4	10	0	84.2914	87.6807	58.4461	38.163	164.76	129.317	8.18614	35.6455	0	203.983	6395.34	25.37	25.4	24.94	2.17	1.65	-2.17	-23.64	2.8	8.05	1.21966e-15	1.11445e-15	3.61582e-15	0.443102	0.558774	0.443888	8.85527e-14	0.320637	0.00433097	7.35562e-12	1.00809e-11	8.72207e-11	1	1	1	2.31424e-09	1	0.092507
ENSG00000224294.1	PINCR	4	9	0.0937485	0.180683	1.65086	3.15355	3.49455	7.55731	8.7947	12.4362	0.558014	1.57648	8.24561	5.51342	1.14	4.28	5.34	1.14	1.29	1.8	1.39	4.04	3.47	0.211243	2.16873e-06	3.26815e-09	0.192442	0.140193	0.0396787	0.114195	4.04257e-06	7.61258e-05	1	0.00296603	7.88344e-06	1	1	1	1	0.00611654	0.00933005
ENSG00000177076.6	ACER2	4	8	0.938461	0.957226	3.00668	4.25454	1.314	3.05125	2.94255	4.34513	0.483774	0.87059	2.17281	2.089	0.2	1.8	2.43	1.24	1.13	1.7	0.67	2.31	2.38	0.653918	4.84923e-05	4.18141e-08	0.00503785	0.0105954	0.00013498	0.136882	2.55514e-07	1.03448e-07	1	0.0346299	5.77163e-05	1	1	0.0530861	1	0.00127398	0.00011996
ENSG00000260912.1	AL158206.1	4	8	0.782243	0.85917	3.28712	4.28931	1.41811	3.52373	3.98782	5.43839	0.508016	0.803096	2.39305	1.54666	0.28	2.19	2.7	1.33	1.46	1.91	0.47	2.39	1.87	0.616208	7.15049e-05	9.11893e-07	0.0143905	0.00756606	0.000516591	0.400884	1.56388e-05	0.000750675	1	0.0450519	0.000709571	1	1	0.113054	1	0.0153456	0.0329647
ENSG00000243295.2	AC126121.3	4	4	0	0.03822	0.003906	0.0059195	0.0301475	0.00462	0	0	2.51572	2.83763	1.86405	1.43091	18.73	15.43	16.1	-2.77	-18.71	-16.92	-0.04	-0.35	-0.26	1.37697e-06	0.00016622	7.13214e-05	0.475229	1.38963e-06	1.28468e-05	0.990323	0.92207	0.942752	0.00484417	0.0867446	0.0156401	1	0.00516803	0.0091743	1	1	NA
ENSG00000170276.6	HSPB2	4	4	0	0.0221695	0.017009	0.004687	0.0130075	0.0110975	0.0093535	0	7.49986	8.46099	8.95095	7.46601	17.23	16.78	15.01	-0.2	-0.56	-16.38	0.05	0.32	-0.02	4.38824e-06	8.99188e-06	0.000151952	0.95534	0.877142	1.50086e-05	0.987288	0.924153	0.994366	0.0132324	0.00841423	0.0253087	1	1	0.0101822	1	1	1
ENSG00000165966.16	PDZRN4	4	4	0	0.006627	0.0011175	0	0	0.0007065	0	0.001186	2.71028	3.18863	2.66213	1.98145	33.11	30.59	0	30.5	0	31.71	0.02	0.06	0.11	1.37258e-11	1.63826e-09	1	1.7591e-09	1	3.27512e-10	0.996553	0.989663	0.981505	6.43833e-08	6.81041e-06	1	1.16695e-05	1	1.26967e-06	1	1	0.998356
ENSG00000172409.6	CLP1	3	12	8.47293	7.73546	9.39715	12.0878	8.89281	10.7908	10.3115	13.1463	7.13006	8.59935	11.0617	10.1728	0.04	0.27	0.76	0.3	0.2	0.53	0.1	0.73	0.78	0.764106	0.0626935	1.20995e-07	0.0353571	0.166683	0.000395085	0.489423	4.23265e-07	6.3398e-08	1	1	0.000138983	1	1	0.0965894	1	0.0012762	7.96437e-05
ENSG00000161513.12	FDXR	3	12	9.94798	11.7644	30.6188	44.1231	16.5717	33.6785	33.8318	54.4091	13.7364	27.5846	67.9799	70.9362	0.44	1.75	2.4	1.03	0.99	1.68	0.83	2.47	2.61	0.465062	0.00349201	6.16317e-05	0.0845917	0.0971618	0.00519274	0.166465	3.92284e-05	1.32594e-05	1	0.595171	0.0140472	1	1	0.450209	1	0.0258736	0.0028969
ENSG00000115255.12	REEP6	3	12	2.1778	2.61612	4.37101	4.73857	1.27211	1.94439	1.7251	2.59254	6.55854	7.84724	7.6714	8.64952	0.44	1.13	1.38	0.63	0.43	1	0.06	0.29	0.65	0.057464	7.70697e-07	1.19225e-09	0.00671522	0.0640261	7.68249e-05	0.789893	0.185984	0.00302836	1	0.00139429	4.10848e-06	1	1	0.0353355	1	1	0.0749631
ENSG00000279718.1	SNX18P12	3	12	1.87946	2.39631	7.62233	9.63184	21.7385	37.7758	38.9529	48.9191	2.08066	4.84976	14.3566	12.5106	0.51	2.14	2.6	0.82	0.81	1.12	1.11	2.95	2.76	0.491478	0.00388373	0.00044711	0.267216	0.27102	0.12853	0.132789	6.73707e-05	0.000199544	1	0.610181	0.0481846	1	1	1	1	0.0338554	0.0154294
ENSG00000064115.11	TM7SF3	3	12	51.208	56.4212	84.3177	86.8592	70.6354	94.8794	91.2949	107.775	52.2075	71.3598	91.5509	91.1048	0.33	0.84	1.01	0.45	0.35	0.56	0.3	0.91	1.07	0.145953	0.000200388	7.54439e-06	0.0490151	0.11877	0.0137325	0.189259	5.85668e-05	2.13047e-06	1	0.0971058	0.0030331	1	1	0.736479	1	0.0325292	0.000892133
ENSG00000164938.14	TP53INP1	3	12	1.8211	2.13487	5.92486	7.67678	8.86032	18.3206	19.2802	27.2771	2.35712	5.12267	15.4436	12.7738	0.39	1.83	2.33	1.06	1.09	1.57	0.99	2.89	2.68	0.458127	0.000554431	1.02982e-05	0.0435845	0.039412	0.00286553	0.0621122	4.43349e-08	3.95853e-07	1	0.197968	0.00370766	1	1	0.327002	1	0.000467866	0.00027142
ENSG00000105290.13	APLP1	3	9	1.53523	2.46215	8.03683	7.58605	0.166775	0.420284	0.340902	1.27215	12.9809	20.0257	15.1555	17.1408	0.89	2.52	2.56	1.35	1	2.8	0.45	0.3	0.6	0.145646	3.86882e-05	2.75986e-05	0.0339624	0.117324	2.29879e-05	0.456178	0.625033	0.325082	1	0.0308789	0.00756514	1	1	0.0135614	1	1	0.774798
ENSG00000230965.1	SNX18P13	3	9	0.381242	0.675131	2.26961	2.81062	8.24316	14.1936	14.1369	20.1849	0.66013	1.58125	2.86684	4.05029	1.03	2.72	3.15	0.81	0.75	1.23	1.09	2.29	2.83	0.138823	6.73119e-05	3.60697e-06	0.206619	0.240821	0.0555743	0.101917	0.000553719	1.90263e-05	1	0.0434915	0.00177587	1	1	1	1	0.105403	0.00369371
ENSG00000121005.9	CRISPLD1	3	8	1.58705	1.8275	1.71247	1.53891	0	0.003005	0.006706	0.0028915	172.813	184.236	120.044	83.5297	0.28	0.22	0.22	15.79	16.79	16.31	-0.12	-0.44	-0.49	0.912748	0.932532	0.931098	4.31794e-07	3.44601e-08	2.96534e-07	0.962321	0.865373	0.850417	1	1	1	0.00204602	0.000183081	0.000398219	1	1	0.975798
ENSG00000251095.7	AC093866.1	3	5	0.147124	0.2183	2.85347	3.0605	0.774931	5.87478	7.85481	13.9567	0.119489	0.323337	0.845338	0.532934	0.78	4.42	4.64	2.91	3.26	4.14	1.21	2.99	2.49	0.412445	2.18597e-06	6.87609e-07	0.00142209	0.000349671	5.75276e-06	0.206403	0.00158873	0.00853144	1	0.00296603	0.000594376	1	0.500164	0.0050359	1	0.181442	0.130438
ENSG00000244649.5	LINC02086	3	5	0.07062	0.151713	0.530774	0.867681	0.45278	1.31923	1.82845	2.35498	0.069256	0.199437	2.87744	2.0414	1.3	3.05	3.89	1.53	1.96	2.32	1.41	5.67	5.14	0.226594	0.00393491	0.000226395	0.128116	0.0517129	0.0223083	0.178017	4.34364e-08	6.8317e-07	1	0.610181	0.03281	1	1	0.874826	1	0.000467866	0.000411952
ENSG00000095970.17	TREM2	3	5	0.024101	0.034099	0.54923	1.10053	2.26977	11.2106	11.8903	28.4809	0	0.0045545	0.643223	0.35877	0.74	4.69	5.81	2.32	2.33	3.62	1.51	9	8.1	0.648921	0.00285813	0.000214487	0.10665	0.104814	0.0118284	0.538777	1.02023e-05	7.33918e-05	1	0.517074	0.0320303	1	1	0.68414	1	0.0122678	0.00914365
ENSG00000254489.2	MPPED2-AS1	3	4	0	0.0054875	0.020982	0	0.0051595	0	0.0015845	0.001988	2.55498	2.07553	2.56294	1.57241	36.89	38.65	0	-36.78	-1.63	-0.61	-0.52	0.09	-0.14	9.92497e-17	2.45379e-18	1	9.53591e-17	0.711154	0.888332	0.89893	0.982367	0.972177	8.37985e-13	3.32943e-14	1	1.58148e-12	1	1	1	1	NA
ENSG00000109625.19	CPZ	3	3	0	0.001446	0.033877	0.008798	0.428968	0.787793	0.691295	1.00916	0.506291	0.664	1.29889	1.16411	14.45	19.12	17.41	0.89	0.68	1.17	0.25	1.43	1.19	6.88713e-06	8.27902e-11	4.39489e-09	0.723287	0.787795	0.64361	0.919842	0.569342	0.636965	0.0193832	4.49336e-07	9.6376e-06	1	1	1	1	1	NA
ENSG00000011600.12	TYROBP	3	2	0.027814	0.020518	0	0	0	0	0.015635	0.0121795	0.044207	0.107604	5.22284	2.93229	-0.33	-33.09	-12.83	0	32.73	32.91	1.16	6.95	6.03	0.957915	1.93393e-07	0.0435347	1	3.37941e-07	3.08162e-07	0.851238	0.258656	0.326673	1	0.000437342	0.579822	1	0.001571	0.000398219	1	1	NA
ENSG00000162643.13	DNAI3	3	1	0.113624	0.283078	0.873581	1.27705	0.181687	0.511702	0.638714	0.629883	0.166418	0.335415	0.633332	0.864123	1.52	3.07	3.76	1.5	1.79	1.76	0.86	2.06	2.58	0.020238	2.10282e-06	6.15603e-09	0.0184688	0.00500866	0.00701186	0.182018	0.00130718	5.76182e-05	1	0.00296603	1.23746e-05	1	1	0.517227	1	0.162728	0.00782518
ENSG00000136378.15	ADAMTS7	2	12	1.03575	1.14676	2.82787	3.89203	1.41864	2.55654	3.0121	3.92562	2.44315	3.60165	4.93601	6.22668	0.33	1.57	2.16	0.86	1.05	1.43	0.36	1.13	1.58	0.436376	0.00019875	3.19013e-07	0.0411517	0.012555	0.000729958	0.393346	0.00718643	0.000168513	1	0.0971058	0.000334575	1	1	0.145653	1	0.371757	0.0145162
ENSG00000167535.8	CACNB3	2	12	4.52712	3.98385	5.77487	5.97156	4.96392	5.5084	5.13032	8.0291	5.69648	7.01143	7.7603	7.55684	-0.02	0.47	0.65	0.17	0.04	0.55	0.13	0.55	0.69	0.906148	0.00493005	0.000102503	0.309565	0.827889	0.00186131	0.432073	0.000996521	3.24906e-05	1	0.686226	0.0187317	1	1	0.263075	1	0.140699	0.00521059
ENSG00000105519.18	CAPS	2	12	8.77677	14.0424	23.9141	27.4254	2.37494	2.6831	2.60054	3.23216	1.70773	2.28579	1.58936	1.76271	0.87	1.57	1.91	0.21	0.13	0.36	0.27	0.01	0.3	0.00986527	3.25483e-06	1.46962e-08	0.533455	0.694155	0.309448	0.437064	0.973606	0.383449	1	0.00401483	2.72693e-05	1	1	1	1	1	0.820087
ENSG00000172831.14	CES2	2	12	9.59097	8.60245	11.8562	15.4786	11.2516	15.6049	13.5293	20.2831	8.9622	11.6803	22.798	22.5077	0.01	0.43	0.94	0.48	0.25	0.8	0.2	1.49	1.56	0.976035	0.261913	0.0125901	0.200949	0.509043	0.036084	0.596367	8.224e-05	3.70614e-05	1	1	0.330505	1	1	1	1	0.0367145	0.00564345
ENSG00000187840.5	EIF4EBP1	2	12	123.186	112.414	102.06	92.6571	85.6324	67.4685	63.0635	58.1341	151.855	131.863	79.5519	48.2786	0.05	-0.15	-0.16	-0.32	-0.44	-0.62	-0.36	-0.87	-1.37	0.816291	0.502837	0.484463	0.165055	0.0550623	0.00746842	0.115391	0.000146852	2.53659e-09	1	1	1	1	1	0.531943	1	0.0499911	6.37318e-06
ENSG00000124098.10	FAM210B	2	12	13.0689	15.9207	22.0387	28.1129	7.12219	10.2079	9.90892	12.8733	7.76566	10.1963	16.182	13.7327	0.47	0.87	1.37	0.53	0.46	0.79	0.23	1.18	1.08	0.13563	0.00536551	1.30465e-05	0.0896998	0.146185	0.0123108	0.465302	0.000163615	0.00059821	1	0.695868	0.00455522	1	1	0.695739	1	0.053127	0.0290011
ENSG00000182325.11	FBXL6	2	12	6.74026	6.17153	7.79819	9.5151	10.2069	12.0955	11.4996	14.9033	8.82499	10.4273	12.9447	12.1077	0.03	0.33	0.75	0.27	0.16	0.49	0.05	0.64	0.72	0.899003	0.121986	0.000353336	0.200705	0.450083	0.0206665	0.812278	0.00205916	0.000590262	1	1	0.0423367	1	1	0.854975	1	0.210875	0.0287967
ENSG00000179163.12	FUCA1	2	12	5.32798	5.31419	11.378	14.3111	6.63746	14.4926	13.8179	22.3906	4.90014	4.88379	6.88971	6.14127	0.19	1.22	1.67	1.13	1.04	1.68	-0.15	0.63	0.57	0.64564	0.00353199	6.17282e-05	0.00675637	0.0128601	6.20164e-05	0.716695	0.131222	0.173133	1	0.595326	0.0140472	1	1	0.0300525	1	1	0.603884
ENSG00000158373.8	H2BC5	2	12	499.966	329.952	134.035	100.76	198.707	167.118	159.355	138.223	313.33	302.169	255.17	155.385	-0.41	-1.78	-2.06	-0.23	-0.33	-0.58	-0.26	-0.29	-0.69	0.359883	6.14987e-05	3.50666e-06	0.597364	0.454821	0.191877	0.562114	0.515487	0.118809	1	0.0407047	0.00177587	1	1	1	1	1	0.51031
ENSG00000286522.2	H3C2	2	12	680.388	461.553	184.145	106.226	260.311	188.764	184.598	127.81	1183.06	866.989	464.609	230.894	-0.41	-1.78	-2.43	-0.46	-0.51	-1.11	-0.6	-1.39	-2.11	0.507336	0.0040365	8.38304e-05	0.454101	0.413611	0.073394	0.329812	0.0248499	0.000623905	1	0.618566	0.0169929	1	1	1	1	0.631298	0.0298321
ENSG00000163956.13	LRPAP1	2	12	40.4677	37.0298	54.7061	68.0871	40.0587	50.8086	48.4666	73.7478	31.0113	33.2763	49.3208	47.1914	0.05	0.55	1.01	0.37	0.27	0.82	-0.08	0.77	0.86	0.838252	0.0139346	7.48505e-06	0.101175	0.236708	0.000281879	0.724312	0.000583168	0.000130626	1	1	0.0030331	1	1	0.0838617	1	0.108599	0.0125425
ENSG00000153029.14	MR1	2	12	1.67337	1.77586	4.46684	5.26452	2.05829	3.25563	3.26577	4.77962	10.5324	11.6607	10.9432	11.1463	0.22	1.53	1.9	0.68	0.64	1.17	-0.01	0.15	0.31	0.578302	8.31652e-05	1.00206e-06	0.0808757	0.0965432	0.00295429	0.982681	0.703055	0.416148	1	0.0480723	0.000732474	1	1	0.334044	1	1	0.842432
ENSG00000172890.13	NADSYN1	2	12	16.464	17.0167	26.0328	32.8263	23.1724	29.7043	29.3752	36.9216	17.6825	20.1386	25.0087	22.2739	0.23	0.78	1.25	0.38	0.33	0.63	0.01	0.6	0.59	0.248551	8.32589e-05	3.13558e-10	0.0525712	0.0961704	0.00164165	0.963306	0.00248646	0.00278189	1	0.0480723	1.89091e-06	1	1	0.247443	1	0.226677	0.0716872
ENSG00000237886.1	NALT1	2	12	3.00619	4.13622	8.15214	9.32807	3.29287	4.01189	4.1835	5.2478	3.72442	6.84031	8.60084	9.23144	0.62	1.56	1.89	0.32	0.34	0.61	0.72	1.33	1.5	0.176592	0.000640693	3.40488e-05	0.47668	0.458671	0.195709	0.115725	0.00343841	0.000954392	1	0.222904	0.00883146	1	1	1	1	0.263895	0.0385723
ENSG00000185220.12	PGBD2	2	12	3.34677	2.74253	3.43447	3.46923	3.51989	3.69616	3.66627	4.17463	2.25381	2.66037	3.62962	2.88074	-0.12	0.16	0.3	0.1	0.04	0.2	0.05	0.78	0.65	0.509443	0.40193	0.105197	0.590451	0.813296	0.301627	0.789017	3.25811e-05	0.000583655	1	1	0.783197	1	1	1	1	0.0227938	0.0286873
ENSG00000142102.16	PGGHG	2	12	6.79608	7.00377	10.326	10.0327	11.0157	11.6398	11.0276	13.114	23.6329	30.1836	31.791	33.5857	0.21	0.72	0.82	0.11	0	0.22	0.17	0.54	0.77	0.377559	0.00196744	0.000461517	0.640364	0.986436	0.344734	0.46733	0.0207844	0.000876077	1	0.420398	0.0494787	1	1	1	1	0.582572	0.036483
ENSG00000161714.12	PLCD3	2	12	7.57702	6.09329	8.59898	10.2017	14.4873	17.792	18.5662	25.5098	10.6372	14.4426	28.8553	25.9607	-0.13	0.3	0.68	0.31	0.34	0.75	0.26	1.58	1.52	0.744412	0.440444	0.0804375	0.425422	0.384448	0.0536185	0.502218	4.60531e-05	9.63247e-05	1	1	0.72077	1	1	1	1	0.0269999	0.0105992
ENSG00000160271.16	RALGDS	2	12	10.0371	9.20041	14.5872	15.4995	10.6113	13.0968	11.897	15.198	6.45162	9.32365	15.5647	15.0404	0.06	0.66	0.88	0.33	0.15	0.48	0.35	1.42	1.5	0.874403	0.063624	0.0135978	0.3556	0.671082	0.182269	0.332905	6.49305e-05	2.56764e-05	1	1	0.339629	1	1	1	1	0.033425	0.00439854
ENSG00000185361.9	TNFAIP8L1	2	12	2.78374	2.90794	2.32308	2.43317	2.88969	2.82429	2.78267	2.6403	2.31207	3.24786	4.3227	4.3989	0.24	-0.14	0.06	-0.01	-0.06	-0.2	0.3	1.02	1.2	0.31259	0.560633	0.809031	0.972822	0.813241	0.434569	0.218815	2.5541e-05	7.64838e-07	1	1	1	1	1	1	1	0.0212645	0.000438305
ENSG00000157873.17	TNFRSF14	2	12	2.75209	2.81261	6.1542	7.5085	5.95308	10.1165	10.218	15.8161	2.73969	4.63101	13.4785	11.906	0.21	1.29	1.7	0.77	0.75	1.36	0.6	2.49	2.4	0.684209	0.0130699	0.00104183	0.135478	0.14504	0.00850024	0.248422	1.47198e-06	3.57557e-06	1	1	0.0875648	1	1	0.569558	1	0.00264141	0.00131285
ENSG00000114383.10	TUSC2	2	12	9.79538	8.81022	11.5402	13.8454	12.0478	14.3149	12.7675	16.1432	11.2116	12.448	17.2424	16.368	0.02	0.36	0.76	0.27	0.08	0.39	-0.04	0.72	0.82	0.924288	0.0834397	0.000218963	0.180369	0.70265	0.0635528	0.855981	0.000406181	5.43123e-05	1	1	0.0324038	1	1	1	1	0.093227	0.00760823
ENSG00000197114.12	ZGPAT	2	12	7.98003	6.58517	8.41864	9.42963	7.62713	6.90356	6.67709	8.20703	6.89149	7.98703	9.9446	9.51076	-0.1	0.2	0.49	-0.12	-0.2	0.06	0.03	0.63	0.72	0.527002	0.231309	0.00260029	0.457927	0.226549	0.735792	0.866075	0.000130332	9.28747e-06	1	1	0.14724	1	1	1	1	0.0474272	0.00242248
ENSG00000124201.15	ZNFX1	2	12	6.16646	6.4401	9.68945	13.278	9.93371	12.8924	12.4908	15.9305	3.45053	4.23424	6.52015	6.09552	0.21	0.77	1.36	0.39	0.31	0.62	0.12	1.04	1.08	0.499547	0.015304	1.68816e-05	0.216357	0.321584	0.0496531	0.715244	0.00101126	0.000635814	1	1	0.00535815	1	1	1	1	0.140699	0.0298471
ENSG00000286811.1	AL353138.1	2	11	3.20702	4.73119	9.28078	9.53068	8.44618	12.2522	12.4114	14.2196	0.451774	1.16247	3.51536	3.73454	0.79	1.67	1.83	0.57	0.55	0.7	1.24	3.15	3.27	0.313597	0.0333175	0.0198113	0.463811	0.48214	0.374847	0.123088	8.12411e-05	4.22651e-05	1	1	0.407965	1	1	1	1	0.0367145	0.00612641
ENSG00000107201.10	DDX58	2	10	0.819718	0.748521	1.35598	1.53832	5.23558	5.99614	5.72014	5.9689	1.38847	1.62695	2.45396	1.61047	0.04	0.85	1.16	0.22	0.12	0.15	0.07	0.93	0.47	0.878104	0.000499695	1.81094e-06	0.341501	0.597581	0.537358	0.781692	9.87278e-05	0.0516441	1	0.19358	0.00105815	1	1	1	1	0.0400721	0.33864
ENSG00000197852.12	INKA2	2	10	1.57684	1.82194	2.95473	4.17195	1.28584	2.26546	2.35619	3.18268	0.33744	0.79691	2.24018	2.27561	0.36	1.03	1.66	0.84	0.85	1.24	1.08	2.95	3.05	0.525275	0.0666073	0.00305598	0.133987	0.127545	0.027038	0.0545574	1.59389e-07	5.90125e-08	1	1	0.161607	1	1	0.931265	1	0.00112136	7.96437e-05
ENSG00000143217.9	NECTIN4	2	10	3.56371	4.24852	13.9565	18.0657	3.74287	13.3501	13.4819	23.0532	0.289448	0.779435	8.6497	7.77776	0.53	2.11	2.59	1.83	1.79	2.58	1.25	5.1	4.96	0.6483	0.0680294	0.025248	0.114016	0.121504	0.0258031	0.280847	1.10437e-05	1.91117e-05	1	1	0.458999	1	1	0.917834	1	0.0122678	0.00369371
ENSG00000198753.12	PLXNB3	2	10	6.08878	5.75808	10.9467	12.5352	1.68007	2.75373	2.64775	4.02003	0.342181	0.841854	2.86226	2.76033	0.08	0.96	1.3	0.73	0.62	1.2	1.11	3.31	3.34	0.904113	0.137766	0.0448051	0.260876	0.340085	0.0642824	0.0887134	3.96618e-07	2.9773e-07	1	1	0.585558	1	1	1	1	0.0012762	0.000249349
ENSG00000244694.7	PTCHD4	2	10	3.0146	5.49353	7.18378	8.97677	9.45779	8.01094	7.99606	6.9254	0.284525	0.542722	1.05252	1.25308	1	1.37	1.82	-0.21	-0.23	-0.52	0.78	2.04	2.34	0.0562274	0.00873598	0.000475207	0.687727	0.656829	0.321129	0.144814	0.000137295	1.10257e-05	1	0.862049	0.0504309	1	1	1	1	0.0482958	0.00263439
ENSG00000185215.11	TNFAIP2	2	10	11.242	8.30786	10.1003	9.84401	6.10243	6.10767	5.20683	5.80982	0.645577	0.827179	4.38349	3.56591	-0.25	-0.03	0.05	0.01	-0.23	-0.11	0.17	2.95	2.69	0.666055	0.954468	0.933983	0.987939	0.702265	0.850797	0.776147	6.99172e-07	5.89939e-06	1	1	1	1	1	1	1	0.00184459	0.00182315
ENSG00000130751.10	NPAS1	2	9	4.14857	3.544	4.79575	4.24825	0.326464	0.7782	0.626147	1.10405	4.09172	4.60644	5.54083	6.90076	-0.05	0.33	0.28	1.26	0.91	1.86	-0.01	0.53	1.04	0.828524	0.188437	0.256194	2.6876e-05	0.00296495	1.32514e-08	0.978557	0.0321655	2.55452e-05	1	1	0.962478	0.0685731	1	3.48848e-05	1	0.6816	0.00439854
ENSG00000274026.2	FAM27E3	2	8	2.32722	2.14856	1.84859	1.64689	0.740078	0.856077	0.783729	0.78352	3.23387	2.86624	1.88098	1.7702	0.05	-0.21	-0.25	0.23	0.07	0.11	-0.33	-0.7	-0.6	0.768038	0.235997	0.162186	0.226925	0.716294	0.628901	0.0607341	8.75691e-05	0.000767006	1	1	0.873658	1	1	1	1	0.0377191	0.0333217
ENSG00000183251.4	OR51B4	2	8	1.72599	2.06665	3.8558	5.12298	15.3755	16.0399	15.6329	15.3648	0.007009	0	0.027469	0	0.43	1.28	1.83	0.08	0.02	-0.09	-1.45	2.17	-1.22	0.144266	8.97503e-06	1.55781e-10	0.766816	0.941349	0.755024	0.480368	0.1832	0.553687	1	0.00841423	1.25258e-06	1	1	1	1	1	0.906167
ENSG00000224689.9	ZNF812P	2	8	9.37224	8.34129	8.55538	7.75237	2.94014	3.05081	2.95023	3.21335	0.0055725	0.0237905	0.372845	0.148325	-0.01	-0.02	-0.03	0.09	-0.01	0.1	2.05	6.36	5.08	0.99084	0.984922	0.973957	0.921788	0.989049	0.911723	0.161324	4.34702e-06	0.000296074	1	1	1	1	1	1	1	0.00611654	0.0203804
ENSG00000250016.2	SNX18P23	2	7	0.22157	0.318296	0.742418	1.08995	3.9796	6.44884	6.38514	8.53186	0.276202	0.7998	1.98707	1.82007	0.72	1.9	2.58	0.72	0.66	1.04	1.41	3	2.92	0.34919	0.0116268	0.000581893	0.308426	0.351338	0.143195	0.0583263	4.60446e-05	7.41909e-05	1	0.977809	0.0584851	1	1	1	1	0.0269999	0.00916744
ENSG00000277639.2	AC007906.2	2	6	0.432494	0.480331	0.785444	1.79755	2.95666	3.21098	3.58842	3.46312	0.294365	0.449501	0.915367	1.12789	0.32	1	2.33	0.14	0.25	0.2	0.43	1.78	2.17	0.526283	0.0468863	3.01191e-06	0.769373	0.592401	0.682568	0.405617	0.000405392	1.62367e-05	1	1	0.00161452	1	1	1	1	0.093227	0.00339955
ENSG00000145536.15	ADAMTS16	2	6	1.35401	1.32087	0.612852	0.316128	3.52271	3.94911	3.30749	3.03879	0.0029395	0.0129305	0.0078125	0.0150655	0.14	-1.03	-1.86	0.2	-0.1	-0.28	1.97	1.49	2.69	0.570821	5.33049e-05	5.409e-13	0.416519	0.690732	0.267546	0.0845684	0.226007	0.0169978	1	0.0370906	6.52379e-09	1	1	1	1	1	0.196354
ENSG00000167971.16	CASKIN1	2	6	0.523003	0.636845	1.27186	1.75081	0.168117	0.213158	0.257711	0.190447	2.05754	3.37432	3.04547	4.78578	0.41	1.4	1.99	0.37	0.6	0.4	0.49	0.62	1.44	0.35201	0.00142651	5.28505e-06	0.40826	0.180481	0.411069	0.259892	0.150739	0.00082439	1	0.361262	0.00236085	1	1	1	1	1	0.0351065
ENSG00000161544.10	CYGB	2	6	0.169262	0.12357	0.1866	0.290141	3.60826	9.82061	8.65677	16.4488	0.36416	0.611474	8.26294	6.06208	-0.35	0.25	0.99	1.47	1.24	2.15	0.59	4.66	4.16	0.756639	0.826459	0.381619	0.183528	0.262782	0.0516297	0.596366	2.8531e-05	0.000188359	1	1	1	1	1	1	1	0.0215062	0.0151038
ENSG00000116016.14	EPAS1	2	6	0.553475	0.560344	0.90071	0.833675	25.4203	31.576	30.3891	37.8308	0.351434	0.439966	4.38759	3.77101	0.27	0.84	0.83	0.34	0.26	0.52	0.18	3.81	3.59	0.789615	0.400317	0.406618	0.728253	0.796425	0.599015	0.860004	0.00012787	0.000310237	1	1	1	1	1	1	1	0.0473479	0.0207859
ENSG00000161509.14	GRIN2C	2	6	0.031993	0.0473715	0.214174	0.372621	0.575109	1.91663	3.24496	3.53979	0.655554	1.63833	3.34462	4.91134	0.67	2.85	3.79	1.78	2.43	2.61	1.15	2.55	3.32	0.472129	0.00194165	3.48335e-05	0.0395082	0.00478247	0.00251917	0.182843	0.00308651	0.000116821	1	0.420398	0.00893887	1	1	0.312158	1	0.249593	0.0119801
ENSG00000277947.1	SNORD3D	2	6	698.167	1044.78	810.442	1512.91	0	0	0	0	0	348.679	0	1871.42	0.73	0.32	1.37	0	0	0	25.4	0	28.35	0.832792	0.9255	0.692549	1	1	1	1.22963e-11	1	3.94317e-14	1	1	1	1	1	1	2.14234e-07	1	5.94432e-10
ENSG00000226965.2	AC073114.1	2	5	0.187513	0.347633	1.13817	2.00839	0.782976	1.40148	1.69203	1.52104	0.196007	0.415444	0.605105	0.640515	1.09	2.74	3.7	0.89	1.1	0.94	1	1.81	2.12	0.0821751	6.02581e-06	7.40113e-10	0.0953148	0.0389549	0.0993319	0.0950135	0.00223354	0.000272358	1	0.00605638	2.9755e-06	1	1	1	1	0.21724	NA
ENSG00000135333.14	EPHA7	2	5	1.07635	0.827025	0.630717	0.564175	0	0	0.000657	0.0032855	61.5787	57.8727	45.0452	19.2353	-0.15	-0.64	-0.69	0	14.43	17.32	-0.3	-0.37	-1.12	0.952132	0.800965	0.78674	1	9.45746e-06	2.41624e-08	0.90475	0.885754	0.659772	1	1	1	1	0.0270556	5.04381e-05	1	1	0.93522
ENSG00000111335.13	OAS2	2	5	0.752762	0.862431	1.36195	1.81756	0.725225	1.2384	1.12327	1.81952	0.071007	0.110233	0.60445	0.462883	0.39	0.98	1.52	0.78	0.62	1.25	0.5	3.3	2.96	0.543909	0.126361	0.0173366	0.220482	0.334531	0.0532205	0.472601	8.81824e-07	1.13559e-05	1	1	0.381564	1	1	1	1	0.00203595	0.00263439
ENSG00000167703.15	SLC43A2	2	5	0.431143	0.459433	0.620523	0.912379	0.37241	0.657547	0.522915	1.59644	6.92005	7.30224	10.1706	9.96018	0.26	0.64	1.34	0.85	0.47	1.95	-0.09	0.65	0.77	0.417829	0.0413513	1.92573e-05	0.00720356	0.136277	4.95531e-09	0.766617	0.0326985	0.0114608	1	1	0.00573486	1	1	1.49414e-05	1	0.683301	0.154787
ENSG00000136275.10	C7orf69	2	4	0.006086	0	0	0	0.027948	0.022642	0.0655665	0.0454945	3.79435	4.5552	3.42572	4.92564	-34.62	-33.74	-11.44	-0.31	1.14	0.95	0.14	-0.08	0.36	1.3016e-19	1.05163e-18	0.00276372	0.9257	0.730235	0.783633	0.964916	0.980377	0.911937	1.3737e-15	2.85381e-14	0.152555	1	1	1	1	1	NA
ENSG00000064886.14	CHI3L2	2	4	0.166759	0.140222	0.321899	0.352274	1.95877	2.74411	2.09341	1.92898	0.010917	0.039052	0.262765	0.1939	-0.1	1.06	1.33	0.54	0.14	-0.09	1.62	4.8	4.33	0.923775	0.304615	0.195284	0.59252	0.890011	0.926611	0.197773	6.39757e-05	0.000336548	1	1	0.900549	1	1	1	1	0.033425	0.0220585
ENSG00000204252.14	HLA-DOA	2	4	6.03357	7.09131	11.4271	13.4131	0.032525	0.074731	0.0797615	0.081701	0.0209685	0.089316	0.252508	0.32773	0.36	1.03	1.42	1.16	1.3	1.06	1.79	3.72	4.13	0.697553	0.261698	0.122433	0.228757	0.176753	0.304932	0.0723516	0.000139945	2.30765e-05	1	1	0.812899	1	1	1	1	0.0484211	0.00429479
ENSG00000130948.10	HSD17B3	2	4	0.463095	1.1384	4.06554	5.23801	0.0688445	0.428714	0.408878	1.16183	0	0.082953	0.0090665	0.012429	1.47	3.26	3.76	2.67	2.48	3.97	5.32	2.45	2.41	0.108853	0.000373416	3.96041e-05	0.00718568	0.0122576	7.66176e-05	0.00243325	0.218642	0.261033	1	0.161008	0.00993005	1	1	0.0353355	1	1	NA
ENSG00000249460.2	LINC02500	2	4	0.00994	0.0040405	0	0	0	0.0076765	0	0	6.83003	5.01134	3.12509	1.75292	-1.14	-30.99	-11.88	31.2	0	0	-0.66	-1.04	-1.4	0.831317	6.62203e-09	0.0261316	5.29338e-09	1	1	0.893681	0.832858	0.776364	1	1.99669e-05	0.465544	2.92627e-05	1	1	1	1	NA
ENSG00000259245.2	LINC02853	2	4	0	0.056789	0	0.0112865	0	0.007783	0.0157605	0	7.55582	11.3128	3.51537	4.17828	18.68	0	16.41	16.15	17.18	0	0.46	-1.04	-0.87	1.13539e-05	1	0.000164144	0.000254225	6.72912e-05	1	0.907795	0.794365	0.826164	0.0299571	1	0.0260492	0.38329	0.131714	1	1	1	0.970877
ENSG00000243961.2	PARAL1	2	4	0	0.003374	0	0	0.0032345	0.008101	0.0038345	0	9.80098	9.37699	11.5035	5.9034	32.18	0	0	1.27	0.04	-26.44	-0.28	0.32	-0.17	1.55814e-13	1	1	0.76513	0.992408	1.37677e-09	0.942379	0.934778	0.96407	8.22229e-10	1	1	1	1	4.67017e-06	1	1	0.995206
ENSG00000231213.6	PLSCR5	2	4	0.0193725	0	0.0093585	0	0.006448	0.0105185	0.002381	0	6.70399	5.89514	5.88612	2.94507	-40.2	-0.97	-13.76	0.76	-1.31	-31.06	-0.4	-0.1	-0.63	1.98053e-23	0.804198	0.000639507	0.847731	0.749787	3.33824e-14	0.914052	0.977926	0.865149	4.1805e-19	1	0.0627081	1	1	3.01966e-10	1	1	0.9794
ENSG00000160321.15	ZNF208	2	4	3.92982	4.13082	6.98603	8.0727	0.405108	0.29936	0.698619	0.508759	0.674858	0.927463	0.607824	0.837377	0.24	0.95	1.29	-0.37	0.75	0.29	0.27	-0.07	0.58	0.25987	5.96455e-06	6.96195e-10	0.26844	0.0166822	0.442018	0.388966	0.826962	0.0660881	1	0.00605638	2.9755e-06	1	1	1	1	1	0.384812
ENSG00000259623.1	AC125257.1	2	3	0	0	0	0	0	1.16874	0	1.66537	1.10565	0.800592	0	0	0	0	0	30.8	0	31.02	-0.67	-30.01	-29.97	1	1	1	1.96113e-05	1	1.71408e-05	0.924095	3.1791e-05	3.25616e-05	1	1	1	0.0542071	1	0.0108174	1	0.0227938	NA
ENSG00000154928.18	EPHB1	2	3	0.632517	0.473041	0.138713	0.182776	1.57525	1.25567	1.14176	0.571661	0.112183	0.093613	0.165746	0.048043	-0.24	-2.08	-1.55	-0.27	-0.45	-1.49	-0.47	0.54	-1.02	0.55112	1.65375e-06	0.000268189	0.494703	0.254952	0.000319406	0.35224	0.292921	0.0529558	1	0.00263987	0.0353511	1	1	0.0900074	1	1	0.344424
ENSG00000186994.11	KANK3	2	3	0.183896	0.165947	0.338245	0.703565	0.074315	0.227134	0.291222	0.378804	0.530467	1.18288	3.8837	3.92458	-0.03	0.99	2.19	1.63	1.93	2.21	1.01	3.06	3.12	0.970472	0.177207	0.00273898	0.0322538	0.0112855	0.00502198	0.161166	1.91635e-05	1.25606e-05	1	1	0.152063	1	1	0.443023	1	0.0175854	0.00280255
ENSG00000225950.8	NTF4	2	3	0.061378	0.160456	0.869159	1.00229	0.004751	0	0.004794	0	0.65542	0.965351	1.36982	1.58209	1.62	3.98	4.3	-1.32	-0.13	0.68	0.36	1.2	1.46	0.114584	7.30473e-05	1.79956e-05	0.550243	0.953674	0.753685	0.689076	0.186214	0.107546	1	0.0450519	0.00549482	1	1	1	1	1	NA
ENSG00000168490.14	PHYHIP	2	3	0.580437	0.604173	0.65276	0.658729	0.951998	1.25251	1.30169	1.53278	0.0171375	0.014996	0.274427	0.229389	0.21	0.27	0.43	0.42	0.44	0.65	-0.26	4.18	3.88	0.820359	0.768871	0.642345	0.650859	0.633716	0.485531	0.809882	3.34791e-05	0.00011668	1	1	1	1	1	1	1	0.0227938	0.0119801
ENSG00000170835.16	CEL	2	2	0.157163	0.123467	0.29953	0.382785	0.164361	0.231404	0.274141	0.277214	0.397394	0.898265	5.27161	3.82115	-0.22	1.05	1.54	0.51	0.7	0.77	1.09	3.98	3.47	0.833447	0.302526	0.128405	0.616354	0.491762	0.459055	0.280818	7.41255e-05	0.000557781	1	1	0.826434	1	1	1	1	0.0363835	0.0286873
ENSG00000162777.17	DENND2D	2	2	0.019449	0.0151765	0.019605	0.030283	0.011192	0.0693095	0.080043	0.143011	0.0195625	0.116221	9.43133	4.98302	-0.3	0.14	0.9	2.63	2.85	3.35	2.46	9.01	8.01	0.877659	0.94311	0.634135	0.149723	0.118578	0.0795813	0.164257	3.01804e-07	5.34529e-06	1	1	1	1	1	1	1	0.00127398	0.00175174
ENSG00000163435.16	ELF3	2	2	0.20715	0.410243	0.166212	0.182777	0.033005	0.040427	0.0754575	0.150492	0.399232	0.581593	6.32863	4.23137	1.19	-0.19	0.05	0.39	1.25	2.12	0.35	4.18	3.53	0.279199	0.861737	0.96191	0.733305	0.270333	0.074408	0.747271	0.000125689	0.00117893	1	1	1	1	1	1	1	0.0473479	0.0443202
ENSG00000213694.6	S1PR3	2	2	0.106604	0.138914	0.138611	0.131131	0.0868685	0.10399	0.150967	0.152713	0.66252	0.893908	1.41816	1.39356	0.55	0.5	0.55	0.29	0.77	0.7	0.26	1.21	1.34	0.0458571	0.0717076	0.0458296	0.290679	0.00422157	0.0231618	0.300566	9.6463e-07	5.02183e-08	1	1	0.589593	1	1	0.88777	1	0.00203595	7.57041e-05
ENSG00000180921.7	FAM83H	2	1	0.152887	0.150776	0.955483	1.3206	0.0140945	0.059642	0.0568245	0.140428	0.0099925	0.0206195	0.0871275	0.095572	0.13	2.76	3.35	2.09	1.94	3.25	0.82	3.33	3.47	0.870754	0.000508527	2.47305e-05	0.0158974	0.0249021	0.000247331	0.385666	0.000200045	9.83889e-05	1	0.19358	0.00693661	1	1	0.0784666	1	0.0594668	0.0106793
ENSG00000185527.12	PDE6G	2	1	0.0501965	0.0860475	0.334023	0.517288	0.132243	0.551076	0.576415	1.83911	0.045292	0.0932465	0.022513	0.084221	0.92	2.85	3.61	2.01	2.07	3.62	0.88	-0.89	1.11	0.288055	0.000508364	8.408e-06	0.00550362	0.00420325	8.81081e-07	0.323968	0.417323	0.211052	1	0.19358	0.00324259	1	1	0.000919611	1	1	NA
ENSG00000157426.14	AASDH	1	12	6.19896	5.30723	7.32817	7.48801	7.60301	7.3073	7.1126	7.2234	6.79599	5.95728	4.83999	2.96329	-0.08	0.36	0.52	-0.04	-0.1	-0.12	-0.35	-0.42	-0.94	0.735906	0.146279	0.0348024	0.882239	0.680177	0.630469	0.159517	0.0857449	0.000133865	1	1	0.530659	1	1	1	1	0.910328	0.0126919
ENSG00000107331.17	ABCA2	1	12	5.47268	5.67668	8.35018	7.09166	7.38144	7.43103	7.91526	8.9882	7.29326	8.89434	9.93817	12.5775	0.21	0.73	0.63	0.04	0.1	0.23	0.08	0.47	1	0.470113	0.0131587	0.0327518	0.878174	0.740126	0.429711	0.788002	0.105144	0.000641702	1	1	0.518905	1	1	1	1	0.974699	0.0299494
ENSG00000139826.6	ABHD13	1	12	8.24348	7.4878	7.53352	7.73661	5.16343	5.36492	5.00184	5.42372	4.70946	4.81889	4.05976	2.52347	0.02	-0.01	0.16	0.08	-0.05	0.02	-0.12	-0.15	-0.66	0.894831	0.94329	0.395962	0.650884	0.783505	0.930755	0.51531	0.419785	0.000434123	1	1	1	1	1	1	1	1	0.0254475
ENSG00000284294.1	AC007326.5	1	12	3.98023	3.28571	4.37696	3.45977	1.28279	2.11186	1.82389	5.57099	3.11178	2.51351	1.26872	2.32181	-0.1	0.25	0.05	0.77	0.49	1.9	-0.52	-1.22	-0.15	0.785679	0.50051	0.899773	0.0505327	0.216943	7.01357e-06	0.182951	0.00201173	0.698859	1	1	1	1	1	0.00559786	1	0.208135	0.945039
ENSG00000225840.2	AC010970.1	1	12	69.8979	94.905	27.4015	134.955	23.2413	1884.17	452.979	236.778	29.7098	25.1872	540.871	21211.2	0.54	-1.23	1.17	6.46	4.39	3.4	-0.39	4.37	9.92	0.78382	0.530374	0.549676	0.000958755	0.0249328	0.0823797	0.841474	0.025651	3.96102e-07	1	1	1	0.963665	1	1	1	0.639186	0.00027142
ENSG00000275740.1	AC091959.1	1	12	1.80106	1.52224	1.59942	1.84765	1.25039	1.22439	1.01192	1.33409	2.06461	3.17488	2.63659	3.36583	-0.06	-0.05	0.29	-0.01	-0.32	0.06	0.44	0.45	0.97	0.825145	0.845497	0.276981	0.971013	0.232457	0.835164	0.0932107	0.0903998	0.000230944	1	1	0.975519	1	1	1	1	0.927427	0.0169828
ENSG00000075089.9	ACTR6	1	12	38.0636	29.7358	30.9305	29.9801	15.8857	14.3293	13.4514	15.7297	20.8132	18.7507	15.6394	8.47108	-0.17	-0.18	-0.1	-0.13	-0.24	-0.09	-0.3	-0.38	-1.08	0.604669	0.584836	0.770306	0.682336	0.468136	0.7875	0.353108	0.248088	0.000971974	1	1	1	1	1	1	1	1	0.0389695
ENSG00000283907.1	AD000090.1	1	12	23.3229	89.5885	22.6301	21.8662	562.37	27.7104	156.608	30.4425	1915.93	18.3908	42.8668	65.3161	2.05	0.08	0.17	-4.37	-1.86	-4.35	-6.71	-5.18	-4.39	0.139425	0.95527	0.904072	0.00161275	0.178385	0.00171055	1.2892e-06	0.000182602	0.00154707	1	1	1	1	1	0.251177	0.0134767	0.0560697	0.0522915
ENSG00000174233.11	ADCY6	1	12	10.0954	9.8703	12.2447	13.5725	5.93902	6.24553	6.30317	6.07892	5.50472	6.98483	8.41296	8.29724	0.14	0.4	0.68	0.09	0.08	-0.02	0.15	0.73	0.9	0.568849	0.0993185	0.00498837	0.695211	0.737525	0.925299	0.527782	0.00249693	0.000202012	1	1	0.210933	1	1	1	1	0.226677	0.0155374
ENSG00000092847.13	AGO1	1	12	11.2248	9.96712	10.1371	9.5873	7.5531	6.94935	6.93499	6.59642	3.62054	4.49836	4.3414	4.92339	-0.01	-0.03	0.02	-0.09	-0.13	-0.25	0.12	0.35	0.73	0.953705	0.865255	0.899048	0.62512	0.484435	0.186297	0.521805	0.0621038	8.90864e-05	1	1	1	1	1	1	1	0.844209	0.0100976
ENSG00000204310.13	AGPAT1	1	12	12.5676	13.3488	17.3592	19.5866	9.81578	11.6766	10.3602	13.4613	14.7432	17.7389	17.126	16.0115	0.25	0.58	0.9	0.27	0.08	0.39	0.08	0.32	0.4	0.330778	0.0210992	0.000382632	0.285588	0.743453	0.127132	0.741201	0.207422	0.116038	1	1	0.0443743	1	1	1	1	1	0.505728
ENSG00000018510.17	AGPS	1	12	30.6556	24.9849	26.3432	25.838	14.8467	15.0116	13.9783	18.0038	20.6626	18.7006	16.1727	11.9667	-0.11	-0.1	0	0.04	-0.1	0.21	-0.32	-0.3	-0.53	0.461325	0.514464	0.999339	0.804496	0.534	0.181989	0.0384224	0.0550093	0.000547586	1	1	1	1	1	1	1	0.813614	0.0285635
ENSG00000204673.11	AKT1S1	1	12	10.8996	10.7612	12.781	14.5192	12.3055	12.4923	11.0079	12.9353	8.6912	11.4748	11.5545	12.552	0.16	0.35	0.67	0.05	-0.16	0.02	0.22	0.51	0.79	0.520839	0.152633	0.00556415	0.823378	0.512607	0.931804	0.363247	0.034827	0.00116934	1	1	0.219311	1	1	1	1	0.698724	0.0441799
ENSG00000259943.1	AL050341.2	1	12	6.51938	5.61679	5.36959	4.74877	3.78689	3.86946	3.51868	3.93748	5.29399	4.59779	4.36549	2.45085	-0.05	-0.16	-0.21	0.05	-0.1	0	-0.37	-0.2	-0.83	0.838039	0.494579	0.386495	0.834649	0.666915	0.991054	0.127633	0.405445	0.000601546	1	1	1	1	1	1	1	1	0.0290651
ENSG00000259001.3	AL355075.4	1	12	343.167	256.002	325.75	439.684	594.151	640.522	539.466	569.157	745.758	477.638	1024.22	6.63535	-0.26	0.04	0.61	0.12	-0.14	-0.11	-0.63	0.57	-6.61	0.806134	0.971302	0.570805	0.911319	0.900353	0.920251	0.560245	0.594952	9.48771e-10	1	1	1	1	1	1	1	1	3.24619e-06
ENSG00000137124.8	ALDH1B1	1	12	8.08248	7.11912	10.4276	11.3311	12.5694	12.5118	11.8622	13.4246	19.8842	22.062	24.2502	22.3242	-0.01	0.49	0.74	0.02	-0.09	0.06	-0.03	0.36	0.43	0.934341	0.00039008	6.7476e-08	0.863923	0.495269	0.663879	0.821541	0.00752749	0.00148221	1	0.162889	8.50976e-05	1	1	1	1	0.378954	0.0507955
ENSG00000175548.9	ALG10B	1	12	9.79033	8.89583	8.34877	6.12977	3.84654	4.29758	3.80369	4.13237	7.48229	6.65043	5.5117	3.03825	0.01	-0.11	-0.43	0.17	-0.03	0.03	-0.32	-0.39	-1.03	0.952698	0.651367	0.0831332	0.488796	0.91651	0.893609	0.200023	0.123831	3.69354e-05	1	1	0.730783	1	1	1	1	1	0.00564345
ENSG00000013523.11	ANGEL1	1	12	2.83444	2.60744	3.2634	4.15313	2.55298	2.59138	2.40856	2.29603	5.22681	5.92661	5.97489	5.0358	0.05	0.32	0.81	0.05	-0.1	-0.19	0.01	0.29	0.23	0.763649	0.0494017	8.2143e-07	0.744363	0.55322	0.270366	0.93047	0.0736685	0.164964	1	1	0.000660485	1	1	1	1	0.882938	0.593232
ENSG00000168876.9	ANKRD49	1	12	6.60193	5.06764	5.80329	5.61822	4.12181	4.18752	3.36291	4.56554	9.34772	9.15738	8.08673	4.45782	-0.23	-0.07	0.01	0.06	-0.3	0.08	-0.19	-0.14	-0.78	0.343216	0.772253	0.965873	0.81297	0.224141	0.765803	0.421624	0.55334	0.00123049	1	1	1	1	1	1	1	1	0.0456961
ENSG00000135046.14	ANXA1	1	12	500.471	391.227	262.314	191.335	175.17	216.544	182.855	203.778	1505.96	1477.5	1265.75	1113.38	-0.17	-0.81	-1.14	0.34	0.04	0.17	-0.21	-0.23	-0.18	0.555804	0.00451727	6.9131e-05	0.239124	0.888022	0.543808	0.461737	0.415893	0.541198	1	0.661913	0.0155848	1	1	1	1	1	0.899171
ENSG00000196975.16	ANXA4	1	12	12.4406	11.8376	15.3271	19.942	16.8045	22.2606	19.6622	26.7888	7.97627	10.8085	16.288	15.5725	0.1	0.42	0.94	0.43	0.22	0.63	0.27	1.18	1.23	0.771706	0.217363	0.00586745	0.201658	0.518237	0.0661015	0.432332	0.000514092	0.000302574	1	1	0.226094	1	1	1	1	0.103337	0.0204668
ENSG00000149089.13	APIP	1	12	23.5635	20.959	22.3958	19.465	12.3763	10.4979	10.9641	11.4284	19.4065	18.8888	17.2909	9.71318	0	0.04	-0.03	-0.22	-0.17	-0.2	-0.22	-0.1	-0.71	0.984631	0.834097	0.899802	0.309902	0.422095	0.362851	0.305408	0.622775	0.000754416	1	1	1	1	1	1	1	1	0.0329647
ENSG00000157500.12	APPL1	1	12	19.3544	16.0484	16.2683	13.9058	18.8175	18.8274	17.1979	16.3494	27.6276	26.0997	19.8302	13.6301	-0.1	-0.13	-0.23	0.02	-0.13	-0.28	-0.24	-0.43	-0.76	0.650481	0.561227	0.308803	0.918859	0.576834	0.226463	0.297248	0.0579064	0.000780593	1	1	0.985962	1	1	1	1	0.825265	0.0338145
ENSG00000186635.14	ARAP1	1	12	12.3144	9.29339	12.1345	11.7991	12.6762	13.5728	14.2469	15.6492	6.75132	10.1801	11.4702	13.3475	-0.2	0.1	0.19	0.12	0.14	0.25	0.4	0.88	1.23	0.530181	0.752312	0.556011	0.713956	0.654864	0.436216	0.210889	0.0062431	0.000124735	1	1	1	1	1	1	1	0.348589	0.0121314
ENSG00000104442.10	ARMC1	1	12	20.4718	17.2743	18.8429	15.6256	15.2442	14.7953	14.3926	14.2983	27.3886	24.2788	20.9645	12.9753	-0.07	0	-0.14	-0.02	-0.09	-0.16	-0.35	-0.35	-0.82	0.754108	0.999079	0.526987	0.913351	0.688523	0.488182	0.128647	0.125821	0.000342195	1	1	1	1	1	1	1	1	0.0222353
ENSG00000267080.6	ASB16-AS1	1	12	1.3516	1.24535	2.31919	2.38834	3.36546	3.86558	3.65871	4.13888	3.81953	5.57814	6.44122	5.79188	0.03	0.9	1.08	0.22	0.11	0.3	0.35	0.86	0.9	0.925215	0.00249934	0.000272914	0.449746	0.717339	0.322977	0.226348	0.00317798	0.00193259	1	0.477638	0.035499	1	1	1	1	0.253111	0.0600449
ENSG00000115239.24	ASB3	1	12	20.081	18.2248	17.9699	17.9284	10.0115	9.68634	10.3596	10.3866	24.1822	26.2175	16.7579	13.4463	0.05	-0.04	0.09	-0.02	0.03	-0.02	-0.05	-0.47	-0.58	0.791702	0.819401	0.62072	0.89817	0.841309	0.893823	0.758864	0.006077	0.000742436	1	1	1	1	1	1	1	0.343864	0.0328747
ENSG00000111875.8	ASF1A	1	12	9.72486	7.67147	8.76239	9.44635	6.47348	6.22703	5.76567	7.20298	42.3306	34.227	27.5102	11.8464	-0.21	-0.04	0.21	-0.04	-0.17	0.07	-0.44	-0.55	-1.54	0.640152	0.926762	0.633914	0.925518	0.701865	0.869311	0.326296	0.216942	0.000590043	1	1	1	1	1	1	1	1	0.0287967
ENSG00000115966.17	ATF2	1	12	14.6121	12.611	12.3194	10.5105	17.3815	17.3354	17.3978	17.151	29.8602	28.117	22.3811	15.0978	-0.04	-0.13	-0.23	0.02	-0.01	-0.08	-0.24	-0.36	-0.73	0.809322	0.442311	0.164901	0.893499	0.971256	0.623699	0.138715	0.0307869	9.45402e-06	1	1	0.876398	1	1	1	1	0.679152	0.00242248
ENSG00000118217.6	ATF6	1	12	20.433	14.9201	14.1605	12.5509	12.1651	10.5287	10.0033	9.56545	13.7748	11.6563	6.16942	4.29896	-0.3	-0.42	-0.46	-0.18	-0.28	-0.42	-0.39	-1.13	-1.4	0.3737	0.22154	0.180432	0.601354	0.413946	0.218378	0.250717	0.000923377	4.13273e-05	1	1	0.886001	1	1	1	1	0.138658	0.00609471
ENSG00000138085.17	ATRAID	1	12	58.732	53.6145	60.2521	64.1612	48.5281	53.4081	50.3125	64.7244	69.4544	60.4067	55.2448	35.4488	0.04	0.15	0.38	0.16	0.05	0.35	-0.35	-0.26	-0.69	0.838326	0.426022	0.0493786	0.408811	0.781225	0.0696033	0.0690594	0.181854	0.000332808	1	1	0.610814	1	1	1	1	1	0.0220585
ENSG00000027847.14	B4GALT7	1	12	7.19248	6.12365	10.688	10.8916	10.8984	11.5804	11.1447	13.5925	12.7401	13.1189	14.0317	12.8636	-0.09	0.69	0.85	0.11	0.03	0.27	-0.14	0.23	0.31	0.718867	0.00391624	0.000349594	0.636828	0.899781	0.258629	0.541872	0.322961	0.197718	1	0.610181	0.04219	1	1	1	1	1	0.638872
ENSG00000116752.6	BCAS2	1	12	39.5823	30.1777	32.3396	30.1803	15.5689	19.6766	17.0159	22.8449	36.1366	31.3834	30.9066	17.1079	-0.21	-0.17	-0.15	0.35	0.12	0.49	-0.36	-0.16	-0.84	0.415972	0.499186	0.558558	0.174098	0.653286	0.0592415	0.163259	0.538803	0.00114199	1	1	1	1	1	1	1	1	0.0435837
ENSG00000258643.6	BCL2L2-PABPN1	1	12	3.18723	2.17179	4.94796	4.8954	3.42968	4.13734	4.21231	5.80163	1.98164	2.9353	4.63637	4.93663	-0.37	0.75	0.87	0.3	0.29	0.71	0.36	1.36	1.6	0.350882	0.0590354	0.0293256	0.449152	0.464945	0.078237	0.362669	0.000645191	6.04451e-05	1	1	0.493769	1	1	1	1	0.111618	0.00794723
ENSG00000188428.20	BLOC1S5	1	12	5.98545	4.32158	4.34178	3.70682	4.37563	4.00451	3.63362	3.87401	10.3433	9.4034	8.81144	5.32422	-0.31	-0.35	-0.45	-0.1	-0.27	-0.25	-0.3	-0.17	-0.68	0.0938079	0.0594264	0.0151059	0.579831	0.136677	0.203008	0.0965521	0.353206	0.000186563	1	1	0.355496	1	1	1	1	1	0.0151038
ENSG00000117475.14	BLZF1	1	12	22.7914	18.8458	22.5819	22.4886	17.2971	20.3792	18.9273	22.1958	10.1084	7.99152	7.52259	4.5296	-0.09	0.11	0.23	0.25	0.12	0.31	-0.49	-0.34	-0.9	0.666449	0.593475	0.248181	0.201134	0.554439	0.121673	0.0152029	0.0886212	7.9512e-06	1	1	0.953284	1	1	1	1	0.924099	0.00226159
ENSG00000168283.14	BMI1	1	12	24.1015	20.7939	19.6004	20.8883	29.0349	27.3997	24.6801	28.0383	43.9506	43.1759	37.4151	23.0271	-0.04	-0.18	0.04	-0.06	-0.23	-0.11	-0.18	-0.15	-0.64	0.832434	0.283873	0.812967	0.725723	0.170882	0.515173	0.276982	0.360388	0.000143476	1	1	1	1	1	1	1	1	0.0130295
ENSG00000168000.14	BSCL2	1	12	15.4179	14.1349	20.2648	24.0269	5.01594	7.40433	6.41056	9.90029	12.8799	14.3018	16.4183	14.6822	0.05	0.52	0.9	0.58	0.34	0.97	-0.03	0.44	0.44	0.835816	0.0366523	0.000273726	0.0200236	0.173594	0.000143313	0.892257	0.0748109	0.0772155	1	1	0.035499	1	1	0.0538766	1	0.887055	0.415815
ENSG00000134717.18	BTF3L4	1	12	47.7308	42.0672	41.181	35.7491	30.3981	27.6565	26.3056	27.7401	59.7895	53.6408	43.7136	26.1251	-0.03	-0.1	-0.17	-0.11	-0.22	-0.2	-0.31	-0.39	-0.92	0.899323	0.648631	0.44078	0.606412	0.323071	0.365363	0.153123	0.0755599	2.39757e-05	1	1	1	1	1	1	1	0.888329	0.00431512
ENSG00000159388.6	BTG2	1	12	8.5335	9.3326	18.1468	22.1508	8.03488	13.7816	13.474	18.7735	6.53546	10.9012	20.5264	20.8273	0.36	1.22	1.63	0.79	0.72	1.18	0.58	1.8	2.02	0.566215	0.0500449	0.00893651	0.204553	0.245166	0.0594957	0.353148	0.00380105	0.0012064	1	1	0.279629	1	1	1	1	0.271767	0.0451277
ENSG00000174206.13	C12orf66	1	12	3.90341	3.35343	3.44178	3.91024	2.83048	3.04158	2.92418	3.22344	5.43874	4.99194	3.58343	2.68799	-0.05	-0.07	0.25	0.13	0.04	0.08	-0.28	-0.54	-0.72	0.823605	0.767687	0.266363	0.561771	0.865305	0.72724	0.207157	0.015273	0.00120349	1	1	0.968338	1	1	1	1	0.507258	0.0451277
ENSG00000179933.6	C14orf119	1	12	13.8096	11.9048	16.9173	17.9968	32.0421	37.4506	34.2512	43.3611	24.2867	24.5428	28.2376	23.4089	-0.04	0.41	0.63	0.24	0.09	0.37	-0.16	0.3	0.23	0.802197	0.0142948	0.000153182	0.14086	0.572011	0.0264655	0.334701	0.0755552	0.173728	1	1	0.0253087	1	1	0.930303	1	0.888329	0.60442
ENSG00000108666.10	C17orf75	1	12	26.9769	21.1978	22.3893	17.3864	12.0053	10.4819	10.8089	12.5489	30.4602	24.7542	17.8249	9.85825	-0.17	-0.15	-0.4	-0.18	-0.16	0.01	-0.45	-0.75	-1.34	0.659976	0.695148	0.300388	0.642733	0.688202	0.984389	0.239048	0.0522691	0.000506551	1	1	0.984856	1	1	1	1	0.800575	0.0274686
ENSG00000197223.12	C1D	1	12	17.4859	13.1895	13.5463	13.1611	10.7541	11.3768	9.79831	12.7654	20.08	18.7554	17.5685	9.95734	-0.23	-0.25	-0.16	0.11	-0.13	0.16	-0.26	-0.11	-0.76	0.198572	0.160742	0.372055	0.52519	0.458298	0.400439	0.138081	0.53134	1.86777e-05	1	1	1	1	1	1	1	1	0.00369371
ENSG00000197982.14	C1orf122	1	12	19.0695	17.1611	28.2724	30.2491	23.5738	27.612	24.8774	29.3016	25.0093	22.6104	30.1557	18.9786	0.03	0.69	0.92	0.24	0.07	0.27	-0.3	0.37	-0.13	0.912239	0.00605589	0.000227963	0.326396	0.768553	0.290709	0.235586	0.136954	0.594129	1	0.720784	0.03281	1	1	1	1	1	0.918881
ENSG00000143612.21	C1orf43	1	12	133.786	114.229	128.719	127.457	87.6425	84.7518	78.9763	84.0538	98.5103	88.6368	81.9711	55.5411	-0.05	0.06	0.18	-0.02	-0.15	-0.12	-0.31	-0.18	-0.53	0.726903	0.681358	0.235886	0.888356	0.317558	0.433699	0.0433526	0.233707	0.000463097	1	1	0.943626	1	1	1	1	1	0.0258695
ENSG00000172244.9	C5orf34	1	12	6.28062	5.21763	3.54923	3.40888	2.09585	2.22732	1.94773	2.22116	9.43533	7.89709	5.40793	3.0775	-0.07	-0.7	-0.64	0.08	-0.13	0.04	-0.42	-0.76	-1.33	0.854575	0.074481	0.102932	0.842802	0.738577	0.923142	0.281567	0.0524766	0.000743297	1	1	0.777439	1	1	1	1	0.802216	0.0328747
ENSG00000205765.9	C5orf51	1	12	9.74816	8.57778	9.14231	8.68697	8.33064	7.98565	7.931	8.119	10.6463	8.96958	6.97485	4.41977	-0.03	0.02	0.08	-0.04	-0.08	-0.11	-0.4	-0.57	-0.99	0.913365	0.929819	0.751683	0.876997	0.762926	0.673413	0.126903	0.0308426	0.000199584	1	1	1	1	1	1	1	0.679152	0.0154294
ENSG00000196954.14	CASP4	1	12	20.6223	16.2203	23.8561	19.9029	33.4956	31.1494	30.9557	32.04	14.1689	13.0263	10.3992	5.39084	-0.16	0.33	0.19	-0.08	-0.12	-0.11	-0.24	-0.34	-1.13	0.607117	0.300106	0.552936	0.806097	0.703861	0.720349	0.459895	0.292798	0.000462546	1	1	1	1	1	1	1	1	0.0258695
ENSG00000122565.19	CBX3	1	12	143.319	143.219	145.007	131.942	99.3641	93.5852	85.7968	88.7218	84.2743	78.4408	71.5474	38.2208	0.16	0.13	0.14	-0.06	-0.21	-0.22	-0.26	-0.19	-0.89	0.513365	0.590791	0.585933	0.807947	0.398915	0.384368	0.300955	0.442725	0.000354879	1	1	1	1	1	1	1	1	0.0228591
ENSG00000183741.12	CBX6	1	12	14.3194	14.1238	16.2971	16.8735	26.6435	26.6839	23.9938	28.1825	18.83	22.6738	27.897	25.6102	0.15	0.3	0.49	0.03	-0.16	0.04	0.08	0.65	0.7	0.457709	0.12669	0.013304	0.874142	0.427314	0.854835	0.69102	0.00102014	0.000445282	1	1	0.33604	1	1	1	1	0.140699	0.0255233
ENSG00000024862.18	CCDC28A	1	12	15.9045	14.6029	15.6402	15.8312	10.5473	10.73	10.123	10.6891	6.74387	6.22333	4.72497	2.92841	0.07	0.1	0.24	0.05	-0.07	-0.04	-0.26	-0.45	-0.93	0.778705	0.705385	0.35449	0.837166	0.799603	0.892042	0.314508	0.0876778	0.000452256	1	1	1	1	1	1	1	0.91964	0.0257274
ENSG00000133773.12	CCDC59	1	12	61.563	48.791	43.5119	38.3085	23.5487	20.1214	17.9682	17.5217	59.3738	47.2002	40.1345	21.318	-0.13	-0.38	-0.44	-0.19	-0.39	-0.46	-0.49	-0.52	-1.19	0.705879	0.290378	0.215736	0.595163	0.273489	0.207117	0.166383	0.143339	0.000879942	1	1	0.925867	1	1	1	1	1	0.036543
ENSG00000112237.13	CCNC	1	12	38.5706	29.9149	31.5537	26.7894	27.5905	27.2133	25.5414	23.5585	35.9126	32.2143	27.1073	15.6889	-0.19	-0.17	-0.28	0	-0.11	-0.28	-0.32	-0.36	-0.91	0.471546	0.506009	0.275683	0.995465	0.662733	0.287318	0.218387	0.165419	0.000389331	1	1	0.9737	1	1	1	1	1	0.0238584
ENSG00000124762.14	CDKN1A	1	12	95.7604	112.459	226.599	334.616	79.5503	133.117	127.179	195.95	31.6252	65.4503	186.389	203.833	0.44	1.37	2.07	0.76	0.66	1.25	0.92	2.69	2.85	0.543523	0.0582747	0.00429487	0.29339	0.361034	0.0845861	0.203331	0.000198898	8.38262e-05	1	1	0.19607	1	1	1	1	0.0594668	0.00972062
ENSG00000153879.9	CEBPG	1	12	28.8096	17.7588	13.3428	6.55699	16.9344	12.3647	10.7738	9.7704	55.8739	41.1908	26.6845	12.7704	-0.59	-1.01	-1.9	-0.41	-0.65	-0.84	-0.57	-1	-1.87	0.29242	0.0750238	0.000765293	0.463206	0.246469	0.136622	0.312281	0.076483	0.000942012	1	1	0.0699346	1	1	1	1	0.888329	0.0382772
ENSG00000115816.15	CEBPZ	1	12	52.2764	43.3622	46.9449	44.7794	27.2614	25.409	22.9745	25.4459	49.4899	41.3048	34.6558	19.7281	-0.08	-0.03	0.02	-0.08	-0.25	-0.16	-0.41	-0.46	-1.06	0.779701	0.902915	0.929707	0.757727	0.359877	0.554587	0.127688	0.089841	9.84693e-05	1	1	1	1	1	1	1	0.92635	0.0106793
ENSG00000123219.13	CENPK	1	12	23.7878	17.1576	12.5274	8.30598	9.74242	11.4703	11.5607	13.3009	42.8181	39.717	29.3094	14.6015	-0.3	-0.81	-1.28	0.23	0.21	0.33	-0.28	-0.52	-1.28	0.414047	0.0289346	0.000577522	0.542154	0.569425	0.384667	0.456268	0.163222	0.0005571	1	1	0.0582887	1	1	1	1	1	0.0286873
ENSG00000031691.7	CENPQ	1	12	7.01112	5.58149	4.85666	3.88637	3.25448	3.96594	3.29219	3.64536	9.56482	7.94277	7.1112	3.26721	-0.17	-0.41	-0.61	0.28	0	0.07	-0.44	-0.39	-1.28	0.598836	0.199507	0.0580541	0.382077	0.992672	0.827531	0.171222	0.221247	6.06257e-05	1	1	0.649528	1	1	1	1	1	0.00794723
ENSG00000168944.17	CEP120	1	12	10.1631	8.13568	9.20133	7.35227	5.73767	6.92062	6.27107	6.94874	13.1753	11.4148	9.94999	6.24128	-0.16	-0.02	-0.22	0.29	0.1	0.23	-0.36	-0.33	-0.82	0.491195	0.913448	0.325547	0.204463	0.659315	0.322243	0.111709	0.140126	0.000266199	1	1	0.992397	1	1	1	1	1	0.0187521
ENSG00000099814.16	CEP170B	1	12	4.25477	3.45707	4.5934	5.30386	6.26221	7.13933	7.3666	9.434	3.00948	3.78349	5.50272	5.94779	-0.12	0.23	0.57	0.21	0.22	0.54	0.14	0.98	1.23	0.652654	0.388184	0.0336568	0.43183	0.417423	0.0418183	0.598268	0.000227082	3.75003e-06	1	1	0.522775	1	1	1	1	0.0627414	0.00131469
ENSG00000198707.17	CEP290	1	12	11.0261	9.87243	9.76759	9.3987	8.55268	7.74325	7.53881	8.16179	10.9615	10.7012	8.51206	5.3997	0	-0.06	0.01	-0.13	-0.19	-0.14	-0.18	-0.28	-0.77	0.995114	0.782723	0.945462	0.555572	0.381535	0.527834	0.403191	0.192658	0.000304117	1	1	1	1	1	1	1	1	0.0204668
ENSG00000153140.9	CETN3	1	12	24.3892	19.7337	18.5714	23.555	12.86	12.9217	12.022	11.847	24.9232	22.9278	22.4898	10.295	-0.15	-0.28	0.2	0.01	-0.09	-0.19	-0.27	-0.08	-1.01	0.603855	0.348602	0.494169	0.96948	0.754548	0.525721	0.35731	0.795902	0.000680524	1	1	1	1	1	1	1	1	0.0309937
ENSG00000131165.16	CHMP1A	1	12	14.3775	12.1265	14.5284	15.406	17.53	19.0452	17.6089	20.2896	15.0767	15.9745	18.3622	18.41	-0.07	0.13	0.35	0.14	0	0.15	-0.09	0.37	0.55	0.630816	0.371198	0.0179391	0.348657	0.977175	0.315409	0.546949	0.0133747	0.000217537	1	1	0.388096	1	1	1	1	0.479087	0.0163153
ENSG00000079432.7	CIC	1	12	5.5425	4.64867	6.30671	7.16592	6.75064	7.85602	8.05452	8.58717	4.59032	6.1232	6.07276	6.91353	-0.08	0.31	0.62	0.25	0.23	0.31	0.23	0.51	0.85	0.700892	0.150998	0.00354051	0.244559	0.273004	0.149523	0.278777	0.0160822	5.96546e-05	1	1	0.177291	1	1	1	1	0.512041	0.00794723
ENSG00000145354.12	CISD2	1	12	23.3742	17.9883	17.6601	15.2619	22.6233	22.4153	19.6021	20.9497	31.2602	26.686	27.344	14.2337	-0.21	-0.29	-0.37	0.01	-0.21	-0.17	-0.37	-0.13	-0.91	0.448189	0.307078	0.186686	0.965506	0.454756	0.555049	0.190285	0.644184	0.00125271	1	1	0.892261	1	1	1	1	1	0.0462565
ENSG00000187118.14	CMC1	1	12	31.9972	28.4762	31.1184	29.6479	23.3886	24.2209	21.7446	26.0016	30.3767	26.6316	22.1827	13.4808	0.03	0.08	0.14	0.08	-0.1	0.1	-0.35	-0.4	-0.9	0.915904	0.751169	0.582454	0.761949	0.679205	0.706996	0.172025	0.111136	0.000372016	1	1	1	1	1	1	1	0.992406	0.0232703
ENSG00000196739.15	COL27A1	1	12	6.58679	5.63406	8.12486	7.4504	9.45457	9.12913	9.75217	8.20224	1.40005	2.21834	3.20967	4.43255	-0.07	0.42	0.43	-0.01	0.03	-0.25	0.51	1.33	1.89	0.852875	0.250343	0.237391	0.974925	0.934464	0.49837	0.168579	0.000295729	2.62742e-07	1	1	0.944607	1	1	1	1	0.0761177	0.000246642
ENSG00000188153.14	COL4A5	1	12	1.44026	2.13171	4.66167	5.49971	9.98352	16.2729	15.8264	19.6955	3.46997	4.66168	5.5442	6.2378	0.69	1.81	2.19	0.73	0.65	0.93	0.27	0.8	1.2	0.156617	0.000204603	6.65238e-06	0.132703	0.181707	0.0542205	0.577733	0.0986401	0.0135122	1	0.0974089	0.00286551	1	1	1	1	0.95858	0.171317
ENSG00000142156.15	COL6A1	1	12	23.1475	17.625	20.2543	19.7566	31.7304	34.2929	27.6169	33.1637	6.73692	8.69545	12.7362	13.7362	-0.2	-0.07	0.02	0.16	-0.19	0.03	0.2	1.05	1.26	0.572379	0.835498	0.951382	0.65178	0.587558	0.944084	0.587243	0.00365951	0.000439765	1	1	1	1	1	1	1	0.266337	0.0254475
ENSG00000148444.16	COMMD3	1	12	21.7932	20.0333	22.794	21.3186	33.403	35.6093	33.1384	36.2137	31.6463	29.3534	27.4829	15.6587	0.05	0.18	0.21	0.11	-0.01	0.07	-0.27	-0.14	-0.73	0.807905	0.406019	0.32953	0.599332	0.958285	0.751561	0.222463	0.519995	0.000841255	1	1	0.995428	1	1	1	1	1	0.0355576
ENSG00000093010.15	COMT	1	12	34.844	28.1745	32.7024	29.8441	63.9674	57.6647	54.6487	62.5994	65.9126	55.3516	42.7636	32.4804	-0.16	0.02	0.02	-0.12	-0.24	-0.07	-0.42	-0.55	-0.74	0.50051	0.926653	0.918978	0.596829	0.311472	0.756783	0.0706585	0.0187998	0.00140609	1	1	1	1	1	1	1	0.557286	0.049638
ENSG00000173085.15	COQ2	1	12	5.96175	4.91378	4.16452	3.92756	8.38037	7.64708	7.5255	7.28478	16.3336	14.8729	14.2253	8.25653	-0.1	-0.4	-0.36	-0.11	-0.16	-0.26	-0.28	-0.12	-0.71	0.621713	0.0500138	0.0836173	0.571246	0.424843	0.22677	0.15867	0.54669	0.00038321	1	1	0.732243	1	1	1	1	1	0.0236055
ENSG00000080947.15	CROCCP3	1	12	2.15723	2.16392	3.00955	2.04169	2.6066	2.20055	2.31262	2.25961	1.93353	3.31788	3.23132	3.95942	0.16	0.6	0.17	-0.22	-0.19	-0.24	0.59	0.89	1.31	0.6722	0.117718	0.64917	0.565061	0.613507	0.5406	0.12671	0.0200182	0.000631739	1	1	1	1	1	1	1	0.56993	0.0298321
ENSG00000101439.9	CST3	1	12	45.2643	50.0882	78.2126	95.4128	91.0486	136.349	129.591	191.616	46.8967	50.724	72.5741	63.8976	0.33	0.91	1.34	0.6	0.5	1.01	-0.07	0.74	0.67	0.347054	0.0100901	0.00015217	0.0912133	0.156755	0.00419957	0.852264	0.0362027	0.0587557	1	0.919013	0.0253087	1	1	0.400014	1	0.712811	0.361967
ENSG00000198730.9	CTR9	1	12	8.02284	6.87492	8.98184	10.0708	12.5857	13.8944	12.8547	15.4946	9.98423	11.6082	10.6269	10.1724	-0.05	0.28	0.58	0.17	0.03	0.24	0.03	0.16	0.3	0.752188	0.0864305	0.000394751	0.292011	0.876387	0.141319	0.857324	0.336297	0.0687095	1	1	0.044705	1	1	1	1	1	0.393091
ENSG00000114395.11	CYB561D2	1	12	8.94898	8.56635	12.5267	14.3331	11.889	14.454	13.8025	17.8364	17.7381	18.5322	20.535	15.8335	0.11	0.6	0.94	0.3	0.21	0.53	-0.1	0.3	0.11	0.489095	0.000100615	1.45367e-09	0.0476568	0.177802	0.000975185	0.512169	0.0457516	0.48044	1	0.055722	4.38317e-06	1	1	0.180025	1	0.767292	0.875032
ENSG00000151065.14	DCP1B	1	12	4.1138	3.99867	6.39714	8.07442	5.0277	6.01801	5.78469	7.19594	4.50465	5.90619	6.99676	5.64635	0.1	0.75	1.21	0.27	0.18	0.46	0.23	0.74	0.6	0.732324	0.00769339	1.68019e-05	0.335161	0.515416	0.10951	0.407689	0.00919772	0.0349926	1	0.796853	0.00535815	1	1	1	1	0.413036	0.279552
ENSG00000137692.12	DCUN1D5	1	12	63.1632	51.3104	47.3227	46.4959	35.4756	34.3111	30.7944	32.3117	113.246	94.4577	74.0619	46.3336	-0.12	-0.3	-0.19	-0.02	-0.2	-0.19	-0.41	-0.58	-1.03	0.623634	0.226515	0.434324	0.934372	0.405114	0.454971	0.0940108	0.0190272	2.74467e-05	1	1	1	1	1	1	1	0.559736	0.00459732
ENSG00000085788.14	DDHD2	1	12	16.3635	13.1298	12.4665	11.4437	13.6056	11.8323	11.4848	12.0119	25.3642	25.5289	19.16	14.0261	-0.14	-0.27	-0.27	-0.17	-0.26	-0.23	-0.17	-0.34	-0.57	0.419363	0.1122	0.116601	0.312259	0.136809	0.203125	0.332179	0.0483008	0.000897641	1	1	0.800471	1	1	1	1	0.774648	0.0371756
ENSG00000107625.13	DDX50	1	12	31.1693	24.9818	31.4066	29.8198	28.154	24.5985	22.7624	24.0378	43.9226	37.2592	30.2794	18.8643	-0.13	0.13	0.18	-0.17	-0.31	-0.28	-0.4	-0.49	-0.97	0.657252	0.65879	0.553783	0.569363	0.302774	0.343633	0.18412	0.101231	0.00124412	1	1	1	1	1	1	1	0.965672	0.0460813
ENSG00000118197.14	DDX59	1	12	10.9274	9.67641	9.32558	9.21969	5.62687	5.43477	5.20956	5.47935	9.12768	7.75642	6.10244	3.32108	-0.03	-0.12	0	-0.03	-0.13	-0.11	-0.37	-0.49	-1.13	0.926434	0.69932	0.994823	0.925138	0.678475	0.725968	0.213723	0.101376	0.000194986	1	1	1	1	1	1	1	0.965672	0.0153746
ENSG00000124795.17	DEK	1	12	63.3935	52.0543	39.1879	27.6037	51.2694	47.1827	40.7837	41.2404	123.329	117.308	98.9314	48.0825	-0.11	-0.58	-0.96	-0.11	-0.34	-0.38	-0.24	-0.27	-1.05	0.700811	0.0536569	0.00135041	0.715497	0.258222	0.208127	0.422438	0.365907	0.000437844	1	1	0.100539	1	1	1	1	1	0.0254475
ENSG00000065357.20	DGKA	1	12	15.2731	15.2088	32.9023	37.2332	14.1857	25.7516	26.3551	35.4664	6.6888	9.34314	13.2482	10.6538	0.17	1.23	1.53	0.87	0.86	1.27	0.31	1.13	0.96	0.685406	0.00361405	0.000299561	0.0389747	0.0407011	0.00269121	0.463724	0.0073848	0.0232629	1	0.599786	0.037711	1	1	0.316153	1	0.377273	0.226301
ENSG00000149091.15	DGKZ	1	12	8.77661	7.10073	9.82599	9.43133	9.31653	9.19907	8.73914	10.0746	9.24079	10.375	12.7205	13.1525	-0.14	0.28	0.35	0	-0.11	0.07	-0.04	0.56	0.77	0.512285	0.17532	0.0884528	0.990009	0.603513	0.732136	0.864476	0.00646701	0.000179029	1	1	0.744135	1	1	1	1	0.35545	0.0148289
ENSG00000172869.14	DMXL1	1	12	11.1314	9.80667	8.62216	7.82064	6.57572	5.5993	6.12698	4.83209	11.0439	11.4002	7.2881	5.39106	-0.01	-0.25	-0.26	-0.19	-0.1	-0.52	-0.1	-0.54	-0.78	0.950515	0.276493	0.255461	0.405024	0.676218	0.0266118	0.660521	0.0186048	0.000743634	1	1	0.962325	1	1	0.930626	1	0.556078	0.0328747
ENSG00000128590.5	DNAJB9	1	12	21.9975	20.4688	18.93	16.4518	25.8358	28.2397	23.2888	25.3995	11.5139	9.67651	7.23061	4.69307	0.08	-0.1	-0.18	0.17	-0.14	-0.07	-0.4	-0.63	-1.04	0.801261	0.760911	0.575732	0.58019	0.655044	0.829119	0.21051	0.0491668	0.00109034	1	1	1	1	1	1	1	0.776733	0.042254
ENSG00000106976.21	DNM1	1	12	19.6179	16.8279	22.2615	13.5675	8.62288	5.56276	8.0683	4.74961	1.05006	1.47142	1.22043	2.51794	-0.07	0.3	-0.3	-0.65	-0.15	-0.91	0.31	0.28	1.48	0.867919	0.468876	0.476106	0.117067	0.721317	0.0302081	0.456369	0.507556	0.000391881	1	1	1	1	1	0.962601	1	1	0.0239174
ENSG00000000419.13	DPM1	1	12	74.7131	63.8819	61.9758	63.2922	37.486	39.98	35.253	44.2826	59.0738	52.6447	51.9838	28.9784	-0.05	-0.15	0.01	0.11	-0.1	0.16	-0.32	-0.11	-0.77	0.780933	0.399143	0.941133	0.544846	0.595764	0.381151	0.0779842	0.554312	1.82082e-05	1	1	1	1	1	1	1	1	0.00369371
ENSG00000254986.7	DPP3	1	12	12.6372	12.0471	15.1498	19.2932	10.9707	12.1245	10.2304	12.285	15.5749	19.0657	20.5513	18.5819	0.1	0.38	0.86	0.17	-0.09	0.1	0.1	0.48	0.5	0.659132	0.0832168	8.34579e-05	0.435898	0.683035	0.640004	0.649027	0.0290965	0.0226525	1	1	0.0169929	1	1	1	1	0.673367	0.224662
ENSG00000136048.14	DRAM1	1	12	8.89794	8.07461	12.4421	14.358	18.7132	23.5474	23.8585	26.2422	5.69054	8.77141	24.6953	17.4129	0.04	0.6	0.94	0.35	0.32	0.44	0.5	2.29	1.81	0.951678	0.309598	0.113364	0.549739	0.585989	0.457606	0.403347	0.000114893	0.00228275	1	1	0.795218	1	1	1	1	0.0449063	0.0645629
ENSG00000169570.10	DTWD2	1	12	2.34362	2.12115	2.17947	1.62266	2.79008	2.39247	2.65526	1.93477	4.39895	3.40425	2.82382	1.43823	-0.01	0.01	-0.28	-0.19	-0.05	-0.61	-0.53	-0.6	-1.34	0.983619	0.980671	0.487586	0.637069	0.897933	0.13661	0.191103	0.138315	0.000925919	1	1	1	1	1	1	1	1	0.037828
ENSG00000111266.9	DUSP16	1	12	4.22006	2.83009	2.86261	3.19147	2.63216	2.63069	2.63293	3.37229	18.9262	15.668	9.42159	8.38185	-0.39	-0.44	-0.15	0.01	-0.02	0.3	-0.43	-0.96	-0.92	0.154823	0.114291	0.578587	0.971252	0.952202	0.288015	0.120821	0.000481167	0.000785959	1	1	1	1	1	1	1	0.0995637	0.0338868
ENSG00000010219.13	DYRK4	1	12	15.9099	11.771	11.1634	9.93054	11.4596	10.292	9.56847	9.28295	15.1592	13.2777	7.5043	5.10563	-0.28	-0.4	-0.43	-0.13	-0.25	-0.34	-0.36	-1	-1.32	0.42253	0.260014	0.219321	0.715008	0.478349	0.341556	0.301532	0.00477637	0.000187025	1	1	0.929128	1	1	1	1	0.301826	0.0151038
ENSG00000203791.15	EEF1AKMT2	1	12	14.8297	11.7622	9.80088	8.57699	11.5557	9.92467	9.70047	10.3222	23.1407	22.0069	18.3424	11.3399	-0.15	-0.48	-0.55	-0.2	-0.27	-0.2	-0.25	-0.27	-0.75	0.386657	0.00712612	0.00216991	0.265092	0.129981	0.284564	0.161044	0.124291	2.13491e-05	1	0.773526	0.131845	1	1	1	1	1	0.00407389
ENSG00000124802.12	EEF1E1	1	12	51.8142	40.9312	37.4315	31.6324	39.8795	36.108	32.9405	33.5625	93.1914	70.5739	64.7464	30.8016	-0.16	-0.35	-0.47	-0.11	-0.28	-0.31	-0.56	-0.48	-1.27	0.638742	0.29266	0.16178	0.735293	0.404027	0.364561	0.0932745	0.152602	0.000135343	1	1	0.873412	1	1	1	1	1	0.0126979
ENSG00000096093.16	EFHC1	1	12	7.02759	7.20447	5.69085	4.99853	6.20261	7.02187	6.86398	6.43899	10.2049	7.9672	8.24596	4.8484	0.21	-0.18	-0.24	0.2	0.15	-0.01	-0.51	-0.26	-0.81	0.351315	0.414249	0.286511	0.377498	0.510234	0.974496	0.024149	0.254728	0.00032808	1	1	0.981354	1	1	1	1	1	0.0218841
ENSG00000149547.15	EI24	1	12	46.6366	42.2089	58.5643	65.8179	47.8363	59.8455	55.2963	73.3321	54.2367	57.3736	75.0568	63.1965	0.03	0.45	0.75	0.34	0.19	0.57	-0.1	0.55	0.52	0.882526	0.0251539	0.000194165	0.088007	0.339288	0.00470221	0.606391	0.00561341	0.0101433	1	1	0.0298322	1	1	0.431094	1	0.33107	0.145671
ENSG00000144895.12	EIF2A	1	12	195.683	158.598	155.799	158.529	184.312	165.696	162.111	154.831	90.2922	83.8248	70.3223	37.1527	-0.11	-0.21	-0.06	-0.12	-0.19	-0.3	-0.26	-0.3	-1.01	0.691501	0.436798	0.826617	0.653298	0.478814	0.265377	0.326344	0.260552	0.00014445	1	1	1	1	1	1	1	1	0.0130394
ENSG00000125977.7	EIF2S2	1	12	103.571	86.7284	86.9185	66.7206	63.3987	57.3729	54.3197	56.9445	107.677	94.738	84.0587	51.7427	-0.1	-0.14	-0.39	-0.12	-0.23	-0.21	-0.35	-0.29	-0.79	0.592366	0.441323	0.0282826	0.509499	0.20621	0.239034	0.0517247	0.0989864	9.25523e-06	1	1	0.485467	1	1	1	1	0.960555	0.00242248
ENSG00000104408.11	EIF3E	1	12	457.302	411.663	397.67	363.002	371.646	332.759	316.152	312.062	338.18	318.81	306.506	188.662	0.02	-0.08	-0.08	-0.13	-0.23	-0.31	-0.25	-0.07	-0.56	0.892822	0.561487	0.565195	0.356569	0.107146	0.0327211	0.0888633	0.623554	0.000114314	1	1	1	1	1	0.995462	1	1	0.0118848
ENSG00000136628.18	EPRS1	1	12	86.9755	70.726	64.018	47.5275	42.6155	35.5055	31.6325	32.0087	128.674	112.938	94.1665	51.2517	-0.15	-0.33	-0.63	-0.23	-0.43	-0.47	-0.35	-0.38	-1.01	0.612148	0.266377	0.0346116	0.429047	0.142619	0.115003	0.233089	0.201398	0.000630413	1	1	0.529423	1	1	1	1	1	0.0298321
ENSG00000205707.11	ETFRF1	1	12	14.9902	13.4038	17.7594	16.5436	11.3454	11.119	10.5995	11.3405	17.9586	15.267	12.3549	6.71954	0.01	0.36	0.39	-0.01	-0.09	-0.04	-0.37	-0.48	-1.17	0.959196	0.17082	0.140897	0.984185	0.720961	0.878103	0.155826	0.0712449	1.02959e-05	1	1	0.841648	1	1	1	1	0.879804	0.00254444
ENSG00000120699.13	EXOSC8	1	12	47.8554	33.7729	28.8076	18.9821	16.9901	15.1164	14.9916	16.8111	86.8547	71.3528	50.1792	24.6902	-0.34	-0.62	-1.1	-0.16	-0.19	-0.09	-0.43	-0.75	-1.51	0.317122	0.0701849	0.00127248	0.644983	0.573242	0.801063	0.206316	0.0283206	9.43502e-06	1	1	0.0971353	1	1	1	1	0.660586	0.00242248
ENSG00000125386.16	FAM193A	1	12	2.82455	2.44337	2.48632	2.29874	3.55169	3.56021	3.57969	3.94652	4.02761	5.08585	4.08957	4.55634	-0.03	-0.07	-0.05	0.03	-0.01	0.05	0.15	0.1	0.46	0.823752	0.637288	0.726944	0.824058	0.951393	0.706689	0.258765	0.45416	0.000633252	1	1	1	1	1	1	1	1	0.0298321
ENSG00000165669.14	FAM204A	1	12	47.9643	37.3429	35.0398	32.0451	27.256	27.1118	23.8353	27.7903	42.7132	37.1107	33.5639	20.0671	-0.18	-0.34	-0.34	0.02	-0.2	-0.04	-0.37	-0.29	-0.83	0.337475	0.0690311	0.0661221	0.915216	0.278021	0.829083	0.0475494	0.116848	7.84496e-06	1	1	0.681009	1	1	1	1	1	0.00226159
ENSG00000204856.12	FAM216A	1	12	29.0695	25.8599	29.4028	27.7711	19.2375	17.0035	16.3304	17.922	23.3857	22.0766	17.6715	12.1414	0.01	0.14	0.18	-0.16	-0.25	-0.16	-0.25	-0.35	-0.7	0.96981	0.528441	0.397406	0.462751	0.259452	0.479931	0.259915	0.106879	0.00125499	1	1	1	1	1	1	1	0.979928	0.0462565
ENSG00000173065.13	FAM222B	1	12	3.51511	2.87551	3.44508	3.26199	2.65041	2.51112	2.95346	2.84143	2.45985	3.31318	3.17615	3.23592	-0.11	0.09	0.13	-0.06	0.13	0.01	0.26	0.46	0.67	0.606031	0.664703	0.51571	0.77575	0.53248	0.954543	0.208607	0.0283251	0.00131511	1	1	1	1	1	1	1	0.660586	0.0480032
ENSG00000077458.13	FAM76B	1	12	16.6363	15.068	14.6545	12.4744	11.1839	11.9512	11.6827	11.0108	17.2646	16.7983	15.5456	8.58062	0.02	-0.07	-0.17	0.14	0.06	-0.04	-0.21	-0.07	-0.73	0.93519	0.734265	0.375979	0.474761	0.767491	0.848587	0.268562	0.71304	0.000163663	1	1	1	1	1	1	1	1	0.0143443
ENSG00000116120.11	FARSB	1	12	7.92992	6.24847	5.73115	5.34486	5.85245	4.64512	4.37465	4.35048	11.7198	11.7023	8.30086	5.44894	-0.17	-0.35	-0.32	-0.31	-0.42	-0.51	-0.15	-0.44	-0.85	0.458917	0.126895	0.160418	0.17508	0.067595	0.0315573	0.50832	0.0555077	0.000240744	1	1	0.871347	1	1	0.979828	1	0.815015	0.0172001
ENSG00000213468.7	FIRRE	1	12	6.13984	6.17909	9.19988	9.4363	12.5379	9.7801	9.95103	8.64402	16.2888	18.061	15.8768	12.3973	0.17	0.7	0.87	-0.33	-0.35	-0.58	-0.03	0.04	-0.11	0.42981	0.00119132	5.01581e-05	0.124895	0.105725	0.00820588	0.888074	0.866941	0.623479	1	0.320088	0.0122213	1	1	0.563754	1	1	0.926444
ENSG00000102531.16	FNDC3A	1	12	18.9436	17.6073	19.5736	19.3806	18.2961	17.988	17.6222	19.1202	40.1592	35.5365	25.1806	16.0455	0.05	0.16	0.29	0.01	-0.06	0.01	-0.33	-0.62	-1.04	0.85914	0.556855	0.295396	0.973749	0.828071	0.978643	0.232415	0.0242596	0.000171759	1	1	0.983993	1	1	1	1	0.623657	0.0145752
ENSG00000280800.1	FP671120.6	1	12	459.553	779.731	113.808	1086.76	107.745	19478.7	4212.74	1954.41	121.639	58.0857	4943.87	137315	0.84	-1.89	1.46	7.64	5.41	4.26	-1.14	5.56	10.61	0.684359	0.359394	0.478337	0.000210134	0.00859742	0.038871	0.58039	0.00700986	2.61258e-07	1	1	1	0.351712	1	1	1	0.36853	0.000246642
ENSG00000149531.15	FRG1BP	1	12	14.041	11.2314	11.7926	11.2875	11.3547	9.6639	9.01734	8.73483	5.19577	4.53186	3.31655	2.09217	-0.15	-0.14	-0.07	-0.22	-0.33	-0.46	-0.33	-0.57	-1.08	0.614484	0.658915	0.828919	0.480358	0.284766	0.147503	0.287719	0.0723719	0.000626255	1	1	1	1	1	1	1	0.882237	0.0298321
ENSG00000178950.17	GAK	1	12	17.9764	16.3672	20.8674	24.7316	17.01	16.9979	18.0098	18.5116	15.8768	16.3345	15.8207	15.2788	0.04	0.33	0.72	0.03	0.07	0.08	-0.14	0.08	0.2	0.830258	0.098711	0.00039248	0.897752	0.727095	0.691928	0.490687	0.675073	0.332111	1	1	0.044705	1	1	1	1	1	0.781182
ENSG00000106105.15	GARS1	1	12	128.162	101.568	86.8083	56.6082	74.7537	58.2473	57.716	51.7524	109.744	92.7094	63.7265	35.0101	-0.18	-0.45	-0.94	-0.33	-0.38	-0.58	-0.38	-0.7	-1.41	0.577278	0.163263	0.00345114	0.306341	0.232629	0.0709807	0.238001	0.0307149	1.13589e-05	1	1	0.174525	1	1	1	1	0.678814	0.00263439
ENSG00000165678.21	GHITM	1	12	130.865	101.307	98.2349	95.7933	64.4908	63.004	59.248	64.168	116.435	97.4879	88.1359	58.9386	-0.19	-0.3	-0.2	-0.01	-0.12	-0.06	-0.41	-0.32	-0.73	0.326229	0.133676	0.304818	0.958547	0.534834	0.746512	0.0404991	0.105862	0.000215951	1	1	0.984856	1	1	1	1	0.977428	0.0163153
ENSG00000257698.2	GIHCG	1	12	13.5876	9.17348	11.5829	11.8983	8.96684	9.01734	7.74805	8.60625	10.3076	8.12672	5.74433	3.84338	-0.4	-0.11	0.05	0.03	-0.21	-0.11	-0.48	-0.79	-1.14	0.154698	0.682945	0.859284	0.909947	0.463582	0.697985	0.0908132	0.00529464	6.4688e-05	1	1	1	1	1	1	1	0.318396	0.00840665
ENSG00000250571.7	GLI4	1	12	8.03239	7.98067	12.5972	14.9912	11.8846	13.7892	14.299	16.1233	8.51474	9.85776	12.0892	11.9012	0.15	0.76	1.15	0.24	0.26	0.42	0.05	0.61	0.71	0.638095	0.013474	0.000189122	0.43763	0.407059	0.183865	0.877217	0.0475764	0.0205911	1	1	0.0297334	1	1	1	1	0.772999	0.215037
ENSG00000023572.10	GLRX2	1	12	49.6569	33.0988	30.4234	21.3992	16.6815	14.4021	13.5885	14.7842	42.0488	32.8673	29.4225	13.6252	-0.41	-0.59	-0.98	-0.19	-0.3	-0.22	-0.49	-0.46	-1.36	0.237512	0.085878	0.00442298	0.591669	0.380422	0.528008	0.155582	0.183763	8.31162e-05	1	1	0.198083	1	1	1	1	1	0.009713
ENSG00000196743.9	GM2A	1	12	5.28151	5.60869	8.83047	9.99447	7.24381	12.1556	10.6209	19.8936	9.89433	11.4295	13.8535	12.8968	0.28	0.87	1.17	0.76	0.54	1.39	0.02	0.59	0.67	0.414488	0.0118946	0.000692494	0.0279603	0.116254	5.38927e-05	0.945312	0.0862536	0.0530943	1	0.981639	0.0660914	1	1	0.0270831	1	0.912733	0.345147
ENSG00000197045.13	GMFB	1	12	22.3802	19.4026	19.5822	17.3179	27.5905	30.4212	26.6391	29.8502	57.9142	52.9283	46.1906	28.8873	-0.04	-0.08	-0.12	0.17	-0.06	0.06	-0.28	-0.29	-0.76	0.863712	0.734287	0.579394	0.452422	0.803767	0.805396	0.204285	0.197001	0.00063753	1	1	1	1	1	1	1	1	0.0298471
ENSG00000242616.4	GNG10	1	12	43.1388	40.9031	38.143	32.5088	47.9571	53.2226	45.8684	55.845	57.2088	46.6575	48.6677	24.5154	0.08	-0.06	-0.15	0.17	-0.07	0.14	-0.46	-0.18	-0.96	0.743813	0.808841	0.543144	0.501997	0.794746	0.575403	0.0685735	0.469755	0.000123944	1	1	1	1	1	1	1	1	0.0121314
ENSG00000100522.10	GNPNAT1	1	12	18.1122	16.5494	16.5261	13.7506	20.7178	19.0139	17.9934	19.4501	44.7385	39.0897	30.8821	17.2723	0.07	-0.01	-0.15	-0.1	-0.21	-0.15	-0.35	-0.51	-1.11	0.833853	0.977053	0.655397	0.773962	0.538055	0.66091	0.305896	0.138322	0.00129993	1	1	1	1	1	1	1	1	0.0476798
ENSG00000133114.18	GPALPP1	1	12	10.0983	8.19999	7.90429	7.22921	6.01639	5.94223	5.62469	6.17478	12.9814	12.8261	9.83037	7.34181	-0.13	-0.24	-0.23	0.01	-0.1	-0.03	-0.18	-0.34	-0.57	0.455746	0.163632	0.166548	0.968552	0.547785	0.843665	0.29018	0.0462709	0.000686292	1	1	0.876398	1	1	1	1	0.767762	0.0311622
ENSG00000164294.14	GPX8	1	12	21.5984	21.3971	18.7109	13.3277	21.7995	22.7314	20.2561	21.4028	26.8949	24.3626	20.3666	10.9271	0.18	-0.08	-0.45	0.08	-0.11	-0.08	-0.31	-0.35	-1	0.552696	0.786533	0.148531	0.785208	0.730147	0.794484	0.315656	0.262382	0.00131322	1	1	0.852454	1	1	1	1	1	0.0480032
ENSG00000145736.14	GTF2H2	1	12	19.8673	15.9502	18.2038	13.9005	30.2471	28.239	25.465	26.3836	33.0868	31.4466	24.7695	14.1015	-0.12	0	-0.26	-0.08	-0.26	-0.26	-0.21	-0.36	-0.99	0.70002	0.993198	0.394319	0.797015	0.409017	0.405283	0.493428	0.245286	0.00140929	1	1	1	1	1	1	1	1	0.049638
ENSG00000226259.10	GTF2H2B	1	12	16.5891	14.1589	15.3337	15.2133	14.9154	13.6783	12.3403	13.5991	15.302	11.2813	13.6383	6.39328	-0.08	0	0.13	-0.1	-0.28	-0.19	-0.59	-0.08	-1	0.76475	0.99996	0.632561	0.698585	0.294955	0.478502	0.0248448	0.747154	0.000156956	1	1	1	1	1	1	1	1	0.0139183
ENSG00000183474.16	GTF2H2C	1	12	22.2864	17.637	19.3056	18.2732	23.8984	21.8283	20.1402	21.1717	32.635	31.0807	26.5554	17.4054	-0.16	-0.09	-0.04	-0.11	-0.25	-0.24	-0.22	-0.23	-0.65	0.318642	0.58675	0.828161	0.503839	0.119701	0.144972	0.170705	0.155847	5.45067e-05	1	1	1	1	1	1	1	1	0.00760823
ENSG00000163607.17	GTPBP8	1	12	9.50958	9.23234	10.9026	9.3082	10.8062	11.1227	10.385	12.0102	14.2199	12.5005	9.58927	6.14344	0.13	0.32	0.21	0.07	-0.07	0.1	-0.32	-0.53	-0.98	0.656704	0.290511	0.474705	0.826514	0.821945	0.741131	0.278142	0.0764163	0.000999666	1	1	1	1	1	1	1	0.888329	0.0396578
ENSG00000187837.4	H1-2	1	12	791.044	574.512	297.058	243.768	362.78	306.55	281.953	234.906	1247.07	931.678	622.883	290.55	-0.3	-1.3	-1.45	-0.22	-0.37	-0.68	-0.58	-1.03	-1.82	0.531853	0.0067637	0.00246312	0.644948	0.436255	0.157296	0.224384	0.0323186	0.000142754	1	0.754171	0.142215	1	1	1	1	0.681744	0.0130295
ENSG00000168298.7	H1-4	1	12	488.69	384.261	156.347	134.591	274.563	196.181	178.773	141.755	1167.29	857.535	452.409	260.115	-0.15	-1.53	-1.62	-0.45	-0.62	-1	-0.62	-1.41	-1.89	0.779941	0.00512322	0.00304789	0.410457	0.252424	0.0676702	0.252606	0.0095579	0.000519012	1	0.68871	0.161607	1	1	1	1	0.417659	0.027937
ENSG00000276368.2	H2AC14	1	12	287.016	193.9	106.934	59.1059	96.9212	65.0323	66.4295	44.6236	149.631	80.8887	52.8202	5.45426	-0.42	-1.31	-2.02	-0.57	-0.55	-1.19	-0.96	-1.55	-4.55	0.633599	0.139655	0.0230926	0.51997	0.533495	0.181133	0.279589	0.0810464	3.43404e-07	1	1	0.437581	1	1	1	1	0.897028	0.00027142
ENSG00000124635.9	H2BC11	1	12	284.935	201.765	82.5294	43.608	89.0831	84.1691	87.1	68.3388	347.07	308.122	212.431	125.914	-0.34	-1.67	-2.46	-0.1	-0.06	-0.47	-0.36	-0.74	-1.18	0.554288	0.00385948	2.24144e-05	0.866832	0.921727	0.422225	0.537091	0.203855	0.0411916	1	0.610181	0.00645755	1	1	1	1	1	0.304149
ENSG00000185130.5	H2BC13	1	12	136.483	99.0785	42.6538	24.9042	46.7604	31.4619	30.5713	16.3576	183.272	163.528	117.363	74.6208	-0.31	-1.57	-2.2	-0.56	-0.61	-1.59	-0.35	-0.68	-1	0.614644	0.0116384	0.000386708	0.364023	0.325131	0.0113725	0.575188	0.275796	0.107443	1	0.977809	0.0444199	1	1	0.674805	1	1	0.488735
ENSG00000180596.7	H2BC4	1	12	257.258	174.441	74.1438	52.0511	138.249	119.496	114.182	106.05	382.313	342.82	235.003	148.136	-0.39	-1.68	-2.05	-0.19	-0.28	-0.45	-0.34	-0.7	-1.03	0.47692	0.00222086	0.000191808	0.723405	0.605413	0.408818	0.534585	0.205215	0.0603769	1	0.454206	0.0297334	1	1	1	1	1	0.367706
ENSG00000149196.16	HIKESHI	1	12	34.8959	30.4529	35.4688	35.8166	23.9235	23.5832	21.9712	24.3915	30.0458	26.2673	24.4486	13.4248	-0.02	0.14	0.28	0	-0.12	-0.03	-0.34	-0.24	-0.89	0.916427	0.546358	0.216382	0.987862	0.593819	0.90624	0.137845	0.30069	0.000113769	1	1	0.926486	1	1	1	1	1	0.0118848
ENSG00000123485.12	HJURP	1	12	12.7903	9.7912	7.28361	4.0999	6.84218	8.67099	7.79781	9.21685	16.4815	18.0653	15.2229	12.503	-0.2	-0.69	-1.4	0.33	0.16	0.32	-0.05	-0.07	-0.16	0.552976	0.0445494	5.10555e-05	0.337128	0.639136	0.354064	0.877803	0.829964	0.642545	1	1	0.0122827	1	1	1	1	1	0.931381
ENSG00000103415.12	HMOX2	1	12	16.2502	15.7074	22.1642	24.6318	9.73332	10.8484	10.0497	12.594	17.1409	18.195	21.4734	20.2979	0.14	0.57	0.85	0.17	0.03	0.31	-0.11	0.41	0.53	0.56035	0.0165896	0.000343822	0.476935	0.899121	0.197287	0.655257	0.0872823	0.0241168	1	1	0.0418872	1	1	1	1	0.9183	0.230061
ENSG00000056050.7	HPF1	1	12	12.6483	9.50739	10.0324	7.64716	11.2515	11.1444	9.74857	11.1152	19.535	17.9535	14.3612	7.86148	-0.24	-0.22	-0.48	0	-0.21	-0.09	-0.27	-0.4	-1.03	0.422439	0.46629	0.107155	0.997999	0.490521	0.772478	0.361271	0.178009	0.000573343	1	1	0.786612	1	1	1	1	1	0.0286873
ENSG00000174775.17	HRAS	1	12	10.6942	9.75539	13.2278	15.3141	12.2665	14.7661	13.8272	18.5168	11.7564	14.4024	18.2847	18.9333	0.06	0.43	0.77	0.28	0.16	0.53	0.08	0.72	0.95	0.794613	0.0778087	0.00150376	0.239938	0.515766	0.0297726	0.731367	0.00279655	8.85586e-05	1	1	0.108356	1	1	0.959335	1	0.241902	0.0100976
ENSG00000198189.11	HSD17B11	1	12	34.7056	31.9925	28.9168	22.2872	12.0931	13.0753	11.4419	11.5424	45.6817	39.8435	32.6832	19.3988	0.06	-0.14	-0.4	0.15	-0.07	-0.12	-0.35	-0.44	-1	0.850042	0.62427	0.176959	0.607113	0.824435	0.696416	0.234086	0.130327	0.000655493	1	1	0.882689	1	1	1	1	1	0.0302972
ENSG00000155304.6	HSPA13	1	12	21.1146	15.6099	14.9653	11.5765	32.141	28.8497	24.7896	24.4072	49.9959	38.2735	26.3142	13.9443	-0.3	-0.38	-0.63	-0.12	-0.37	-0.46	-0.51	-0.86	-1.65	0.52153	0.411935	0.177872	0.791108	0.432863	0.329234	0.272895	0.0664207	0.000417221	1	1	0.883054	1	1	1	1	0.861349	0.0250582
ENSG00000142798.20	HSPG2	1	12	13.964	14.6673	16.2937	14.8483	2.54537	3.54977	3.34499	4.06352	4.37963	6.87801	19.0452	21.6998	0.27	0.34	0.34	0.51	0.36	0.62	0.5	2.28	2.46	0.714083	0.640151	0.646388	0.488741	0.623086	0.399871	0.497298	0.00196437	0.000858637	1	1	1	1	1	1	1	0.205494	0.0360556
ENSG00000005700.15	IBTK	1	12	17.3485	14.4785	15.1385	13.7097	11.659	12.4936	11.5237	12.1699	18.7859	17.5356	15.7028	9.87748	-0.1	-0.08	-0.09	0.12	-0.02	-0.01	-0.25	-0.18	-0.67	0.60772	0.670722	0.643376	0.518102	0.912299	0.976048	0.181034	0.344635	0.000336374	1	1	1	1	1	1	1	1	0.0220585
ENSG00000134049.6	IER3IP1	1	12	11.3125	9.15827	8.31198	7.20309	11.6511	11.4604	10.2431	11.2298	21.3052	18.7794	15.8716	9.74143	-0.12	-0.32	-0.4	0.01	-0.19	-0.12	-0.34	-0.37	-0.87	0.588849	0.13503	0.0625238	0.974488	0.383258	0.592354	0.112008	0.0878959	5.81546e-05	1	1	0.66884	1	1	1	1	0.921118	0.0078275
ENSG00000077238.14	IL4R	1	12	3.56456	3.09776	4.54938	4.53085	12.1876	13.4567	12.8359	15.6408	2.12697	2.64966	4.9911	4.68998	0	0.48	0.59	0.17	0.07	0.29	0.12	1.37	1.38	0.993258	0.233722	0.136559	0.674783	0.86852	0.46304	0.765847	0.00062244	0.000533631	1	1	0.833578	1	1	1	1	0.110547	0.0281334
ENSG00000142856.17	ITGB3BP	1	12	49.5339	39.279	42.1271	37.7905	25.7872	21.0823	23.5798	18.9052	36.0078	33.6735	27.306	13.8734	-0.17	-0.12	-0.14	-0.26	-0.14	-0.51	-0.26	-0.36	-1.12	0.49992	0.642195	0.565305	0.308068	0.591957	0.0515168	0.299178	0.150544	9.81136e-06	1	1	1	1	1	1	1	1	0.0024651
ENSG00000100379.17	KCTD17	1	12	3.78516	3.11301	3.39497	2.97716	5.3449	5.31497	4.84263	5.67018	5.8762	7.92985	7.33284	8.39417	-0.11	-0.04	-0.1	0.02	-0.14	0.03	0.22	0.39	0.77	0.57397	0.836585	0.613588	0.917508	0.448285	0.883262	0.235824	0.039175	3.60342e-05	1	1	1	1	1	1	1	0.733743	0.00564345
ENSG00000127663.15	KDM4B	1	12	4.10007	3.94105	5.47526	6.86804	5.66797	6.60196	7.22989	7.53559	3.62775	3.79314	3.25917	4.1481	0.13	0.54	1	0.25	0.33	0.36	-0.12	-0.08	0.46	0.451553	0.00134658	3.14498e-09	0.143359	0.0456144	0.0339158	0.493091	0.637791	0.00655685	1	0.344736	7.88344e-06	1	1	1	1	1	0.11405
ENSG00000007202.15	KIAA0100	1	12	30.311	27.6051	34.4216	32.2397	30.3013	32.2688	31.2821	33.6982	35.6319	41.448	42.6037	43.4354	0.04	0.3	0.35	0.12	0.04	0.09	0.02	0.34	0.56	0.808198	0.0639543	0.0342423	0.471009	0.81099	0.574085	0.886677	0.0363592	0.000566792	1	1	0.526171	1	1	1	1	0.712811	0.0286873
ENSG00000163807.6	KIAA1143	1	12	13.7545	11.992	11.0809	11.2439	9.0628	7.78744	7.37038	6.95647	19.9421	20.1007	20.1704	11.6864	-0.03	-0.19	-0.04	-0.2	-0.3	-0.43	-0.16	0.1	-0.51	0.844457	0.176634	0.775367	0.172218	0.0355714	0.00351968	0.257856	0.496891	0.000383639	1	1	1	1	1	0.367657	1	1	0.0236055
ENSG00000137807.16	KIF23	1	12	19.6436	15.6078	11.7018	7.17837	8.5041	9.64994	9.65975	8.57122	28.7418	30.2649	23.9083	16.887	-0.15	-0.63	-1.21	0.19	0.15	-0.05	-0.12	-0.23	-0.47	0.653085	0.0637319	0.000359797	0.568826	0.669293	0.878021	0.731225	0.497031	0.167734	1	1	0.0423367	1	1	1	1	1	0.596645
ENSG00000170759.11	KIF5B	1	12	52.0962	41.6588	40.3511	35.8386	38.255	41.6296	37.3864	43.6486	60.0938	54.8392	54.9282	32.8067	-0.14	-0.25	-0.29	0.14	-0.04	0.13	-0.3	-0.05	-0.58	0.390614	0.133067	0.0778772	0.389328	0.803717	0.44005	0.0741143	0.762324	0.000461065	1	1	0.71734	1	1	1	1	1	0.0258695
ENSG00000088970.16	KIZ	1	12	11.3146	9.10172	9.7087	8.2982	6.28821	4.31233	4.87332	4.72302	5.31838	4.57053	3.87277	2.21683	-0.15	-0.1	-0.21	-0.5	-0.36	-0.47	-0.36	-0.39	-1.03	0.623431	0.727624	0.487362	0.092018	0.221164	0.124434	0.229187	0.196425	0.000554824	1	1	1	1	1	1	1	1	0.0286873
ENSG00000129347.21	KRI1	1	12	8.86604	8.19993	9.54541	10.1314	6.35054	5.41033	5.37094	5.93575	6.1738	7.73765	7.11616	7.30734	0.05	0.22	0.44	-0.21	-0.25	-0.17	0.14	0.29	0.53	0.753521	0.180521	0.00755873	0.199501	0.136583	0.328731	0.391467	0.0863476	0.0013618	1	1	0.256007	1	1	1	1	0.912733	0.0489954
ENSG00000141068.14	KSR1	1	12	1.96073	2.33877	1.9306	2.36981	3.17514	4.38159	4.32338	5.12207	2.86351	4.51299	2.82057	4.17842	0.42	0.09	0.52	0.49	0.43	0.66	0.47	0.05	0.8	0.0155544	0.602283	0.00273096	0.00342495	0.0114681	0.000177142	0.00580259	0.788102	2.67107e-06	1	1	0.152063	1	1	0.0625306	1	1	0.00103247
ENSG00000126777.18	KTN1	1	12	55.5783	45.2466	42.5636	37.9636	62.9344	60.8279	54.7531	58.5596	52.7842	49.7011	46.4816	27.8865	-0.11	-0.27	-0.3	-0.02	-0.21	-0.16	-0.25	-0.11	-0.66	0.530544	0.125903	0.0811571	0.908443	0.237683	0.351553	0.158471	0.524292	0.000132369	1	1	0.722886	1	1	1	1	1	0.0126295
ENSG00000186615.11	KTN1-AS1	1	12	2.41734	2.79394	2.87547	2.21092	3.16443	2.50512	2.6333	3.26103	4.36127	5.54746	4.52775	2.32339	0.39	0.37	0.12	-0.31	-0.28	0	0.2	0.13	-0.65	0.0591791	0.0762905	0.557167	0.127415	0.167123	0.993612	0.326321	0.534338	0.00137596	1	1	1	1	1	1	1	1	0.0490983
ENSG00000100600.15	LGMN	1	12	7.29278	6.79772	7.56538	7.95187	6.19072	8.31428	7.6761	10.3554	25.3154	25.7109	23.4836	21.8206	0.07	0.17	0.38	0.45	0.3	0.69	-0.14	-0.03	0.07	0.662298	0.269257	0.0151888	0.00440206	0.0559416	2.02108e-05	0.358707	0.842504	0.658268	1	1	0.356752	1	1	0.012188	1	1	0.935169
ENSG00000136490.9	LIMD2	1	12	4.8441	3.996	5.60485	4.943	4.65578	5.07213	4.56215	4.44392	2.75288	3.6896	6.18862	6.9627	-0.11	0.33	0.28	0.16	-0.03	-0.09	0.24	1.33	1.59	0.78893	0.430742	0.501512	0.703946	0.940454	0.837226	0.567593	0.00143511	0.000135824	1	1	1	1	1	1	1	0.172472	0.0126979
ENSG00000182541.18	LIMK2	1	12	2.96829	3.24555	6.01363	8.09473	2.87804	4.6178	4.12826	5.50216	3.11157	3.76216	5.95231	6.25243	0.32	1.14	1.7	0.68	0.5	0.85	0.09	1.04	1.21	0.462714	0.00876757	9.61332e-05	0.120047	0.254392	0.0526984	0.842798	0.0170975	0.00560722	1	0.862049	0.0181166	1	1	1	1	0.530678	0.105005
ENSG00000148943.12	LIN7C	1	12	21.1494	19.7206	21.2789	18.8211	24.5355	25.4229	22.316	25.3257	21.8851	18.0829	17.2482	9.36943	0.06	0.13	0.08	0.08	-0.14	-0.02	-0.44	-0.29	-0.97	0.774593	0.51583	0.662433	0.693057	0.464518	0.919562	0.0241443	0.139531	5.48454e-07	1	1	1	1	1	1	1	1	0.000344498
ENSG00000261824.7	LINC00662	1	12	19.6447	13.8923	13.0391	9.30014	12.3166	9.47358	9.39662	6.65939	29.1241	21.0954	12.517	6.29832	-0.38	-0.48	-0.84	-0.34	-0.4	-0.92	-0.6	-1.13	-1.91	0.385305	0.268346	0.0549258	0.4324	0.357934	0.0364577	0.167819	0.00940794	1.16106e-05	1	1	0.636674	1	1	1	1	0.416139	0.00265197
ENSG00000240024.5	LINC00888	1	12	7.16232	5.27321	5.42555	4.96822	11.5757	10.9383	9.62596	10.2675	5.33072	4.30618	4.14233	1.7261	-0.28	-0.28	-0.28	-0.05	-0.26	-0.23	-0.44	-0.28	-1.34	0.301056	0.287475	0.29719	0.863289	0.326993	0.390793	0.104944	0.290504	8.95971e-07	1	1	0.984486	1	1	1	1	1	0.000450226
ENSG00000123384.14	LRP1	1	12	6.70612	6.77489	8.25034	8.49698	9.19246	16.2784	20.5643	22.1186	3.76534	5.70217	6.61497	8.47255	0.18	0.42	0.6	0.84	1.12	1.22	0.44	0.95	1.42	0.645919	0.288405	0.124194	0.0318424	0.00434175	0.00188345	0.261005	0.0151263	0.000273281	1	1	0.818752	1	1	0.264694	1	0.505953	0.0191614
ENSG00000066557.6	LRRC40	1	12	12.44	8.94813	8.41414	7.22609	5.2904	6.04792	5.34396	6.26169	16.6629	14.9167	11.5328	6.57693	-0.31	-0.45	-0.54	0.21	0	0.18	-0.31	-0.5	-1.07	0.275582	0.118086	0.0568008	0.46343	0.993286	0.538386	0.276508	0.0823422	0.000174476	1	1	0.646292	1	1	1	1	0.900368	0.0145752
ENSG00000186687.16	LYRM7	1	12	9.90574	9.93848	8.48239	6.24842	5.38364	4.45795	3.82418	4.00448	8.88087	7.1448	5.88875	3.54111	0.16	-0.11	-0.41	-0.25	-0.51	-0.5	-0.49	-0.57	-1.07	0.560546	0.705519	0.145571	0.376148	0.0712849	0.0835924	0.0803487	0.0421383	0.000151994	1	1	0.845303	1	1	1	1	0.749195	0.0135581
ENSG00000140280.14	LYSMD2	1	12	5.71803	5.75667	5.27373	4.98997	7.44011	6.69229	6.40182	6.41009	7.2389	6.1727	6.20053	3.26433	0.17	0	0.06	-0.13	-0.22	-0.2	-0.39	-0.16	-0.85	0.465543	0.990342	0.809537	0.574878	0.328773	0.416049	0.0889709	0.483708	0.000236305	1	1	1	1	1	1	1	1	0.0170654
ENSG00000002822.15	MAD1L1	1	12	13.2697	8.98132	7.03171	5.76167	44.5954	42.7166	40.8085	44.625	3.24847	3.70101	2.74911	3.6222	-0.36	-0.8	-0.96	-0.04	-0.14	-0.04	-0.01	-0.16	0.42	0.149613	0.0016808	0.000157372	0.868539	0.570797	0.888432	0.963964	0.53713	0.1008	1	0.393206	0.025627	1	1	1	1	1	0.473598
ENSG00000110514.19	MADD	1	12	9.59703	8.35633	7.73721	8.1876	7.10994	6.93311	7.47255	6.91906	9.95032	12.5646	10.0863	12.1365	-0.02	-0.19	0.01	0	0.06	-0.08	0.15	0.08	0.54	0.894668	0.225392	0.92822	0.976669	0.717403	0.61604	0.345332	0.597673	0.000598298	1	1	1	1	1	1	1	1	0.0290011
ENSG00000099785.10	MARCHF2	1	12	3.57609	4.1585	6.12272	7.02843	3.64723	5.57359	5.18529	7.28043	8.56592	9.09267	12.0526	11.2222	0.38	0.89	1.22	0.63	0.51	0.94	-0.1	0.59	0.62	0.185204	0.00179009	1.77857e-05	0.0274088	0.0721924	0.00128025	0.714201	0.0364091	0.0289418	1	0.411675	0.00549482	1	1	0.215788	1	0.712811	0.252487
ENSG00000232119.8	MCTS1	1	12	46.9306	44.5068	49.2675	46.5263	38.0086	35.723	33.6728	31.7341	30.9023	27.6705	24.0412	14.4613	0.11	0.19	0.24	-0.06	-0.18	-0.31	-0.32	-0.32	-0.81	0.641174	0.415359	0.305136	0.780723	0.431668	0.19129	0.164187	0.170036	0.000488903	1	1	0.984887	1	1	1	1	1	0.0268008
ENSG00000136146.15	MED4	1	12	16.5347	14.0482	15.653	16.5534	14.1258	14.9599	13.9554	16.4411	27.6098	36.1024	40.4804	41.0934	-0.08	0.04	0.25	0.1	-0.01	0.15	0.22	0.64	0.83	0.720943	0.870598	0.2545	0.645937	0.945488	0.500897	0.306368	0.00330331	0.000136455	1	1	0.962141	1	1	1	1	0.259181	0.0126979
ENSG00000169519.21	METTL15	1	12	6.04259	5.86511	5.53837	4.51866	6.38079	5.71674	5.86524	5.62309	13.3698	11.8704	7.37974	5.31402	0.12	-0.01	-0.17	-0.13	-0.13	-0.2	-0.34	-0.83	-1.1	0.683897	0.980282	0.545643	0.659958	0.642793	0.491416	0.238555	0.00363496	0.00012469	1	1	1	1	1	1	1	0.266337	0.0121314
ENSG00000173214.7	MFSD4B	1	12	3.08642	3.05038	4.41344	4.84624	6.28974	6.52799	6.21542	6.00939	1.94659	2.49616	2.33817	2.47516	0.13	0.63	0.9	0.09	-0.04	-0.12	0.19	0.38	0.61	0.572074	0.00743693	0.000146538	0.715113	0.876265	0.621162	0.412625	0.11273	0.0101659	1	0.785276	0.0248928	1	1	1	1	0.995227	0.145699
ENSG00000102858.13	MGRN1	1	12	7.04486	6.76198	8.47072	9.16907	5.1868	5.84849	6.48747	7.22633	5.59705	7.30541	8.98071	10.7283	0.14	0.39	0.63	0.19	0.3	0.38	0.21	0.79	1.17	0.686628	0.258533	0.0651789	0.584978	0.374542	0.268779	0.534633	0.0209949	0.000650696	1	1	0.678239	1	1	1	1	0.584696	0.0301823
ENSG00000150527.17	MIA2	1	12	10.1051	7.92261	7.26327	6.53365	9.57731	9.25278	9.53117	8.70684	23.6952	18.677	13.6648	7.5627	-0.19	-0.36	-0.39	-0.02	-0.01	-0.19	-0.48	-0.71	-1.41	0.532604	0.225096	0.196821	0.935265	0.981019	0.519382	0.107851	0.01714	2.41441e-06	1	1	0.90232	1	1	1	1	0.531213	0.000957822
ENSG00000164877.19	MICALL2	1	12	4.0846	3.59167	7.16663	8.60131	2.88345	4.65515	5.57787	6.44391	1.2772	1.90576	2.66812	3.77856	-0.03	0.93	1.32	0.71	0.93	1.11	0.38	1.16	1.72	0.946816	0.0569966	0.00669546	0.145919	0.0552486	0.0238558	0.436105	0.0179089	0.000435618	1	1	0.241778	1	1	0.903633	1	0.544105	0.0254475
ENSG00000151338.18	MIPOL1	1	12	8.75463	8.17937	6.56131	5.90554	5.12517	3.4774	4.25453	2.54354	12.3891	12.795	8.08112	4.75052	0.07	-0.3	-0.32	-0.53	-0.28	-1.05	-0.11	-0.56	-1.06	0.827546	0.33207	0.303577	0.0862434	0.368049	0.000785411	0.731521	0.0699273	0.000560411	1	1	0.984856	1	1	0.152241	1	0.874858	0.0286873
ENSG00000126005.17	MMP24OS	1	12	10.7204	10.5096	14.693	18.9324	9.31046	11.742	10.9622	15.652	10.3849	13.0985	14.6957	15.6081	0.16	0.57	1.08	0.35	0.24	0.66	0.16	0.6	0.86	0.593671	0.0567982	0.000326872	0.240402	0.427471	0.0310912	0.599745	0.0447769	0.00414596	1	1	0.0404349	1	1	0.97315	1	0.766157	0.0904839
ENSG00000146085.8	MMUT	1	12	6.20738	5.37175	5.57996	4.60058	6.71002	6.92986	6.7407	7.24727	7.00848	6.28247	4.78517	2.52391	-0.03	-0.03	-0.19	0.07	0	0.05	-0.32	-0.5	-1.18	0.925753	0.905135	0.500585	0.802441	0.999927	0.871746	0.251685	0.0732938	2.42935e-05	1	1	1	1	1	1	1	0.882237	0.00431512
ENSG00000020426.11	MNAT1	1	12	30.763	22.6515	20.7868	19.1277	20.1822	17.8949	16.8824	16.1228	32.4555	29.2885	20.3603	14.6976	-0.26	-0.45	-0.44	-0.14	-0.25	-0.38	-0.31	-0.64	-0.91	0.36704	0.115354	0.120386	0.616234	0.37106	0.189189	0.27372	0.0239889	0.00137725	1	1	0.80879	1	1	1	1	0.623657	0.0490983
ENSG00000115540.15	MOB4	1	12	23.5496	20.1119	19.9419	17.9555	19.0419	19.2424	18.5847	18.6845	38.5055	34.4919	27.0811	16.3714	-0.05	-0.12	-0.14	0.03	-0.04	-0.08	-0.31	-0.46	-0.97	0.832067	0.608095	0.547301	0.894395	0.87501	0.751519	0.192589	0.0518262	3.68206e-05	1	1	1	1	1	1	1	0.796682	0.00564345
ENSG00000086504.17	MRPL28	1	12	32.3294	29.4821	39.2548	38.3909	29.9646	34.239	32.919	37.1662	33.3809	39.1826	43.6743	47.2776	0.04	0.4	0.5	0.21	0.13	0.25	0.05	0.48	0.76	0.870771	0.0737568	0.0230338	0.333206	0.547647	0.265852	0.815136	0.0291352	0.000580737	1	1	0.437153	1	1	1	1	0.673523	0.0286873
ENSG00000114686.9	MRPL3	1	12	90.1151	77.1121	77.0435	74.5758	91.3337	78.7254	75.4939	75.0862	88.4946	83.7142	73.6993	47.0966	-0.04	-0.11	-0.02	-0.19	-0.28	-0.34	-0.24	-0.21	-0.63	0.806485	0.54844	0.898374	0.285902	0.115029	0.0592021	0.173608	0.241762	0.000435481	1	1	1	1	1	1	1	1	0.0254475
ENSG00000128626.12	MRPS12	1	12	25.1231	23.5285	28.432	33.249	26.4709	24.968	24.0847	27.0564	43.2993	42.5717	51.1144	46.0968	0.08	0.3	0.66	-0.06	-0.14	0.01	-0.2	0.32	0.36	0.621903	0.0759307	8.5482e-05	0.732999	0.397452	0.974801	0.223809	0.0592594	0.0333491	1	1	0.0171833	1	1	1	1	0.833263	0.273034
ENSG00000204568.12	MRPS18B	1	12	35.5413	29.6814	34.3427	35.58	33.3963	34.6868	31.5479	34.7657	59.2505	53.8768	44.1857	33.4348	-0.09	0.07	0.25	0.07	-0.09	0	-0.3	-0.36	-0.56	0.574671	0.685606	0.139267	0.666498	0.605097	0.981991	0.0746466	0.033538	0.000837099	1	1	0.838727	1	1	1	1	0.691843	0.0355472
ENSG00000147649.10	MTDH	1	12	48.1206	43.5251	38.1086	37.4607	33.7201	30.168	27.7454	29.8626	54.4545	49.8589	41.1997	25.8331	0.04	-0.22	-0.11	-0.13	-0.28	-0.24	-0.28	-0.35	-0.82	0.864328	0.327711	0.613623	0.545842	0.205846	0.277032	0.208189	0.11183	0.000206763	1	1	1	1	1	1	1	0.993758	0.0157422
ENSG00000156469.9	MTERF3	1	12	15.4473	12.9773	15.1526	13.5673	7.30995	6.30327	6.23342	6.53294	18.9202	16.9104	13.6398	8.24921	-0.08	0.09	0.06	-0.19	-0.23	-0.24	-0.32	-0.43	-0.9	0.771353	0.745589	0.836482	0.491939	0.408716	0.400376	0.257155	0.122604	0.00133443	1	1	1	1	1	1	1	1	0.0485906
ENSG00000065911.13	MTHFD2	1	12	242.205	194.856	154.207	92.1103	85.2798	70.2863	66.2254	63.908	443.142	347.606	259.517	138.306	-0.17	-0.54	-1.17	-0.26	-0.38	-0.48	-0.51	-0.69	-1.37	0.639824	0.139245	0.00133219	0.480789	0.294747	0.192309	0.16327	0.0565552	0.00016615	1	1	0.0996716	1	1	1	1	0.821222	0.0144781
ENSG00000085760.15	MTIF2	1	12	29.5877	22.0685	23.4806	23.5954	20.3825	17.8405	16.5656	18.3777	34.2381	32.7033	28.2023	17.3349	-0.26	-0.22	-0.08	-0.17	-0.3	-0.2	-0.23	-0.2	-0.69	0.131113	0.208654	0.653895	0.326708	0.0812209	0.257123	0.19088	0.244945	6.98465e-05	1	1	1	1	1	1	1	1	0.00892318
ENSG00000166912.17	MTMR10	1	12	4.5919	3.97682	3.44845	3.50506	4.72212	3.68631	3.74255	2.50625	2.97878	3.11608	2.7195	2.45729	-0.05	-0.3	-0.15	-0.32	-0.34	-0.94	-0.09	-0.05	-0.01	0.79555	0.111908	0.436222	0.086055	0.0681829	1.80961e-06	0.62567	0.776929	0.953075	1	1	1	1	1	0.00175384	1	1	0.994608
ENSG00000128654.14	MTX2	1	12	29.5374	22.0261	23.6037	22.4793	32.4376	30.8964	29.773	31.0146	44.9526	39.7439	34.9272	22.4181	-0.25	-0.21	-0.15	-0.05	-0.13	-0.11	-0.34	-0.31	-0.73	0.149193	0.235403	0.392396	0.79168	0.450689	0.537891	0.0522013	0.0764517	2.42072e-05	1	1	1	1	1	1	1	0.888329	0.00431512
ENSG00000099331.13	MYO9B	1	12	21.891	18.3815	20.5515	19.8666	7.84464	8.09424	8.31263	7.45125	7.29953	9.60151	9.44886	10.8655	-0.07	0.03	0.1	0.07	0.07	-0.14	0.2	0.46	0.82	0.773426	0.899666	0.653195	0.758556	0.747768	0.545331	0.367356	0.0438857	0.000303018	1	1	1	1	1	1	1	0.761094	0.0204668
ENSG00000176182.6	MYPOP	1	12	1.5173	1.40844	2.11114	2.01699	1.11736	1.15226	1.08896	1.44546	1.78156	2.62063	2.67448	2.98693	0.06	0.59	0.65	0.07	-0.06	0.32	0.37	0.69	1.04	0.82957	0.0242042	0.0123363	0.788613	0.833114	0.273132	0.156736	0.00734512	5.75323e-05	1	1	0.329178	1	1	1	1	0.377193	0.00782518
ENSG00000187109.15	NAP1L1	1	12	457.55	398.096	372.23	357.196	334.415	309.031	281.259	298.514	317.251	320.198	311.428	205.315	-0.03	-0.18	-0.11	-0.08	-0.26	-0.22	-0.16	0.05	-0.35	0.807126	0.0798759	0.29153	0.409985	0.0126613	0.033787	0.130737	0.642462	0.000650644	1	1	0.982981	1	1	1	1	1	0.0301823
ENSG00000137513.10	NARS2	1	12	13.6382	10.1344	10.9434	9.09031	7.43583	6.06736	5.56829	4.85043	14.6035	11.6255	8.83634	5.09913	-0.24	-0.2	-0.34	-0.25	-0.42	-0.66	-0.49	-0.69	-1.23	0.440311	0.529867	0.276091	0.415608	0.181917	0.0398403	0.118388	0.0275527	8.14104e-05	1	1	0.974376	1	1	1	1	0.655612	0.00958798
ENSG00000067798.16	NAV3	1	12	7.82454	7.04125	7.75084	5.71084	13.2152	9.46547	10.9751	6.9022	3.40635	4.52022	3.12227	2.15811	0.03	0.11	-0.21	-0.45	-0.28	-0.98	0.28	-0.02	-0.34	0.899469	0.669526	0.414173	0.0659371	0.264518	9.64654e-05	0.280051	0.944309	0.200375	1	1	1	1	1	0.0417735	1	1	0.643241
ENSG00000160194.18	NDUFV3	1	12	9.34596	7.74468	11.1486	12.8225	13.8593	15.4773	14.2357	16.5628	12.3826	13.2074	14.9358	10.9703	-0.11	0.37	0.71	0.18	0.03	0.22	-0.07	0.36	0.11	0.499416	0.0277063	2.67724e-05	0.280806	0.837009	0.205379	0.668519	0.0312828	0.503173	1	1	0.00742304	1	1	1	1	0.680173	0.884896
ENSG00000110400.11	NECTIN1	1	12	2.0638	1.80744	2.01178	1.7469	2.00918	2.87049	2.552	3.80855	1.84763	2.92436	5.58592	4.97542	0.02	0.09	0.01	0.52	0.32	0.87	0.45	1.77	1.73	0.972743	0.861262	0.977414	0.289403	0.523872	0.0808322	0.361694	0.000360424	0.000475257	1	1	1	1	1	1	1	0.0864445	0.0261478
ENSG00000151414.15	NEK7	1	12	28.5928	25.2676	23.6759	21.3512	17.9643	17.44	16.2328	16.4452	23.7983	21.3467	16.0008	9.17045	0	-0.15	-0.17	-0.02	-0.15	-0.2	-0.31	-0.53	-1.08	0.987089	0.576516	0.528938	0.940502	0.582505	0.469853	0.256219	0.0502479	7.273e-05	1	1	1	1	1	1	1	0.784418	0.00913671
ENSG00000176953.12	NFATC2IP	1	12	11.4991	9.22829	10.7669	9.86194	10.5192	10.0937	10.1245	10.3194	10.7142	13.4306	13.5881	13.6165	-0.17	0.02	0.03	-0.04	-0.07	-0.09	0.14	0.44	0.63	0.396731	0.91819	0.885309	0.854357	0.716532	0.658245	0.47602	0.0249841	0.00121753	1	1	1	1	1	1	1	0.631298	0.0454312
ENSG00000050344.9	NFE2L3	1	12	12.8724	14.7736	20.4853	23.7749	39.7946	39.0488	33.5694	32.5214	3.29177	2.97905	3.16247	2.24367	0.34	0.78	1.14	0	-0.25	-0.35	-0.34	0	-0.28	0.29212	0.0158631	0.000429529	0.995472	0.445555	0.283212	0.3055	0.995063	0.391006	1	1	0.0466716	1	1	1	1	1	0.826011
ENSG00000244005.13	NFS1	1	12	16.3172	17.2105	22.4544	25.6519	13.5286	13.748	12.8786	15.0889	23.8396	24.3275	20.4855	23.8748	0.24	0.58	0.91	0.05	-0.08	0.1	-0.16	-0.16	0.23	0.311981	0.0157221	0.000146366	0.848691	0.723853	0.668152	0.511598	0.500421	0.342829	1	1	0.0248928	1	1	1	1	1	0.790356
ENSG00000196865.4	NHLRC2	1	12	9.43469	7.19132	6.59715	5.91331	5.86392	5.4623	5.256	4.82442	8.17027	7.65294	6.04466	3.37486	-0.22	-0.4	-0.43	-0.07	-0.17	-0.32	-0.24	-0.38	-1	0.284477	0.0568259	0.0401027	0.737343	0.405746	0.125277	0.247696	0.0668092	1.4433e-06	1	1	0.562978	1	1	1	1	0.862431	0.000659324
ENSG00000010322.16	NISCH	1	12	18.1935	16.0629	20.6155	17.04	8.62178	10.7027	9.88073	11.7523	18.5921	21.7924	24.5425	25.1024	-0.01	0.3	0.16	0.33	0.18	0.39	0.06	0.51	0.69	0.974813	0.150279	0.454133	0.117563	0.391726	0.0646867	0.764193	0.0144459	0.00102433	1	1	1	1	1	1	1	0.496572	0.0403178
ENSG00000087095.13	NLK	1	12	7.91113	8.046	10.7885	10.8149	9.29613	8.50187	8.85703	9.62472	5.03697	5.07795	4.71393	3.90798	0.2	0.57	0.71	-0.1	-0.08	-0.03	-0.15	-0.01	-0.1	0.227324	0.000494016	1.37036e-05	0.528937	0.612953	0.839362	0.373475	0.970315	0.55158	1	0.19358	0.00465575	1	1	1	1	1	0.904904
ENSG00000123609.11	NMI	1	12	6.85018	5.37179	6.48524	6.48275	8.33582	8.24201	7.72945	8.14906	17.1366	14.5624	15.8676	7.47621	-0.18	0.04	0.17	0	-0.1	-0.12	-0.36	0.01	-0.93	0.546851	0.898934	0.551858	0.991688	0.725176	0.695638	0.211499	0.985844	0.00139761	1	1	1	1	1	1	1	1	0.0495741
ENSG00000225921.7	NOL7	1	12	35.8643	25.4635	27.5456	24.2159	30.4293	27.1147	25.9885	26.7147	41.8799	34.4951	37.3925	17.7921	-0.31	-0.26	-0.32	-0.14	-0.23	-0.23	-0.42	-0.08	-0.98	0.241453	0.315588	0.21684	0.588239	0.380565	0.374803	0.111462	0.758496	0.000184891	1	1	0.92725	1	1	1	1	1	0.0151038
ENSG00000213281.5	NRAS	1	12	27.1537	21.2662	20.0601	17.6634	20.6237	22.8523	20.0351	23.3682	31.7074	28.9	27.3599	16.301	-0.17	-0.32	-0.38	0.17	-0.04	0.12	-0.29	-0.15	-0.7	0.390174	0.108315	0.0577126	0.379381	0.850528	0.554307	0.1398	0.451334	0.000377111	1	1	0.648183	1	1	1	1	1	0.0233948
ENSG00000185189.18	NRBP2	1	12	3.37416	3.21922	4.58548	4.18202	3.79247	4.79464	4.49757	5.65606	5.8715	8.2945	12.3162	13.5061	0.09	0.56	0.56	0.35	0.24	0.52	0.32	1.2	1.41	0.827904	0.172232	0.169529	0.390629	0.555542	0.20803	0.433795	0.00330302	0.00050931	1	1	0.876398	1	1	1	1	0.259181	0.0275192
ENSG00000107672.15	NSMCE4A	1	12	27.8569	21.8181	20.4469	17.4817	19.2191	16.0215	15.9722	15.3012	37.5109	34.6771	28.9653	16.3024	-0.2	-0.33	-0.43	-0.24	-0.28	-0.38	-0.29	-0.34	-0.93	0.464308	0.232707	0.126114	0.38549	0.323706	0.181851	0.29186	0.222252	0.000865457	1	1	0.821774	1	1	1	1	1	0.0361406
ENSG00000178694.10	NSUN3	1	12	7.08533	5.81275	6.64846	6.56224	6.46024	5.93357	5.56514	4.83907	11.039	10.5698	9.2725	6.09202	-0.13	0.03	0.14	-0.09	-0.23	-0.46	-0.23	-0.17	-0.59	0.451869	0.879835	0.399366	0.605158	0.169153	0.00890148	0.1687	0.297359	0.000334951	1	1	1	1	1	0.579279	1	1	0.0220585
ENSG00000075188.9	NUP37	1	12	39.0631	32.939	33.1818	30.8799	19.445	18.3806	17.6594	20.265	40.3268	36.8253	26.3797	16.7859	-0.08	-0.12	-0.09	-0.07	-0.15	-0.03	-0.28	-0.57	-1	0.739162	0.630667	0.711596	0.777477	0.547234	0.888565	0.251806	0.0196838	4.13053e-05	1	1	1	1	1	1	1	0.566776	0.00609471
ENSG00000167693.17	NXN	1	12	2.26939	2.31968	1.99335	1.73966	1.74239	1.92693	1.88612	1.96024	5.30239	6.1041	5.7648	6.6663	0.2	-0.06	-0.13	0.19	0.11	0.14	0.03	0.21	0.6	0.283196	0.740533	0.485741	0.329437	0.577342	0.495656	0.882495	0.266254	0.00110934	1	1	1	1	1	1	1	1	0.0426615
ENSG00000124596.17	OARD1	1	12	15.6338	12.9546	12.4165	11.6653	11.0965	10.9056	9.4742	10.1569	19.358	18.903	13.5721	9.28377	-0.11	-0.22	-0.17	0	-0.22	-0.15	-0.19	-0.45	-0.78	0.620411	0.333881	0.432909	0.994194	0.325374	0.519202	0.390723	0.0412947	0.00044136	1	1	1	1	1	1	1	0.749195	0.0254475
ENSG00000115947.14	ORC4	1	12	25.9594	22.5129	21.6401	19.036	22.6794	21.3258	21.1651	24.3287	40.2375	30.8438	25.965	13.6992	0	-0.14	-0.2	-0.07	-0.11	0.04	-0.52	-0.59	-1.3	0.995686	0.729126	0.607412	0.855681	0.78862	0.923065	0.182601	0.137435	0.000948576	1	1	1	1	1	1	1	1	0.0384403
ENSG00000128699.14	ORMDL1	1	12	21.5614	18.9578	23.0051	22.277	48.7199	46.3634	44.3083	44.4683	69.4947	58.9823	53.1623	29.4838	-0.03	0.21	0.3	-0.04	-0.13	-0.18	-0.39	-0.3	-0.94	0.892953	0.409303	0.238622	0.876803	0.598196	0.477408	0.121038	0.231214	0.000187534	1	1	0.945698	1	1	1	1	1	0.0151038
ENSG00000155100.11	OTUD6B	1	12	13.9138	12.4101	11.3339	9.94016	7.31159	7.00954	6.05217	6.59569	14.5064	12.4682	10.8547	6.66749	0.01	-0.18	-0.23	-0.04	-0.28	-0.22	-0.38	-0.38	-0.88	0.979697	0.45697	0.330992	0.861875	0.243281	0.362739	0.112407	0.11095	0.000222365	1	1	0.996612	1	1	1	1	0.992253	0.0165948
ENSG00000253738.2	OTUD6B-AS1	1	12	9.30149	6.93698	8.28592	7.49797	6.35259	6.36372	5.45611	6.6176	7.8615	7.46916	7.11949	3.81183	-0.26	-0.05	-0.06	0.02	-0.22	0	-0.23	-0.07	-0.76	0.221943	0.817422	0.773562	0.908506	0.319954	0.982805	0.292297	0.762657	0.000422335	1	1	1	1	1	1	1	1	0.0252647
ENSG00000154814.14	OXNAD1	1	12	9.42165	7.96518	8.28184	7.3003	5.59634	4.84464	4.77748	4.13471	13.1486	11.3288	6.96276	5.03418	-0.08	-0.07	-0.12	-0.18	-0.23	-0.46	-0.38	-0.89	-1.1	0.794534	0.819861	0.703721	0.550715	0.452766	0.142733	0.221805	0.003828	0.000365083	1	1	1	1	1	1	1	0.271767	0.0231245
ENSG00000172239.14	PAIP1	1	12	53.7996	41.5204	41.07	37.7914	38.5493	33.7076	33.0107	32.1267	55.1538	50.402	43.4631	26.2097	-0.2	-0.27	-0.26	-0.17	-0.22	-0.33	-0.28	-0.28	-0.81	0.290514	0.153356	0.170176	0.366029	0.25075	0.088702	0.136435	0.143826	2.29791e-05	1	1	0.876398	1	1	1	1	1	0.00429479
ENSG00000111845.5	PAK1IP1	1	12	28.2878	21.3705	22.231	23.2358	26.3613	21.0487	19.861	21.4667	44.143	37.7549	32.3589	18.962	-0.23	-0.23	-0.04	-0.3	-0.41	-0.36	-0.38	-0.4	-0.93	0.358218	0.349703	0.864139	0.219138	0.0934247	0.146122	0.116509	0.101265	0.000148347	1	1	1	1	1	1	1	0.965672	0.0133115
ENSG00000152782.16	PANK1	1	12	1.87851	2.60773	3.35672	4.03019	3.72452	4.27693	4.26327	4.28233	7.02127	7.29044	8.45598	6.30302	0.6	0.95	1.35	0.22	0.17	0.18	-0.12	0.37	0.13	0.0858911	0.00663695	0.000108552	0.518808	0.618103	0.60118	0.728952	0.288383	0.696141	1	0.750446	0.0194385	1	1	1	1	1	0.944603
ENSG00000178184.16	PARD6G	1	12	1.36007	1.4392	2.20645	2.07973	2.1006	3.28898	3.15869	3.78754	1.69559	2.39376	3.63158	3.48673	0.25	0.82	0.85	0.65	0.55	0.8	0.32	1.22	1.29	0.497625	0.0279886	0.0214696	0.0799209	0.13691	0.0316103	0.391277	0.000982627	0.000468527	1	1	0.42629	1	1	0.980354	1	0.140699	0.0258719
ENSG00000138617.16	PARP16	1	12	5.30927	4.017	3.98421	3.76738	23.596	26.9362	24.8812	29.9884	5.45867	4.33995	3.11829	2.17921	-0.22	-0.3	-0.25	0.21	0.07	0.28	-0.5	-0.76	-1.03	0.399344	0.259655	0.339113	0.414884	0.792346	0.282016	0.0563012	0.00378508	9.33673e-05	1	1	1	1	1	1	1	0.271767	0.0103494
ENSG00000185619.18	PCGF3	1	12	10.0219	9.60425	10.0881	10.8227	8.53401	9.74422	9.03556	11.2378	8.71035	10.0132	12.6006	12.4676	0.11	0.13	0.36	0.22	0.09	0.33	0.01	0.6	0.75	0.616271	0.543879	0.0865724	0.296637	0.677083	0.124403	0.960674	0.00431276	0.000435378	1	1	0.739378	1	1	1	1	0.285345	0.0254475
ENSG00000175087.10	PDIK1L	1	12	5.07435	3.70697	3.88808	3.45343	2.19651	1.76754	1.70187	1.66483	6.52231	5.79298	4.31414	2.51544	-0.31	-0.27	-0.31	-0.3	-0.36	-0.5	-0.33	-0.56	-1.11	0.337695	0.405299	0.329123	0.359817	0.266883	0.140455	0.306295	0.0835029	0.00056577	1	1	0.995428	1	1	1	1	0.901363	0.0286873
ENSG00000121892.15	PDS5A	1	12	38.7758	31.6235	29.5264	25.0361	32.5916	27.338	27.5286	26.1522	42.2413	42.963	35.526	24.5212	-0.12	-0.28	-0.38	-0.22	-0.26	-0.37	-0.14	-0.19	-0.52	0.359815	0.0419127	0.00479744	0.101351	0.0596141	0.00646362	0.31213	0.163571	0.000124094	1	1	0.20665	1	1	0.500634	1	1	0.0121314
ENSG00000092621.13	PHGDH	1	12	103.249	78.5669	54.1497	24.1295	55.2989	37.757	33.1651	26.3882	136.256	123.927	70.7359	41.1135	-0.28	-0.82	-1.86	-0.52	-0.74	-1.11	-0.29	-0.89	-1.42	0.569376	0.0938185	0.000148796	0.293206	0.133571	0.0243195	0.548183	0.0712689	0.00383875	1	1	0.0250996	1	1	0.908235	1	0.879804	0.0863719
ENSG00000038210.14	PI4K2B	1	12	8.84683	8.43125	7.89795	6.11863	8.40105	9.37281	8.18249	9.82779	11.1495	9.73033	8.87792	5.17313	0.11	-0.05	-0.29	0.16	-0.05	0.15	-0.35	-0.27	-0.88	0.673448	0.853808	0.256752	0.518242	0.837143	0.543542	0.157321	0.285863	0.000463335	1	1	0.962478	1	1	1	1	1	0.0258695
ENSG00000100151.16	PICK1	1	12	8.73247	7.34716	10.5678	11.8589	7.92766	9.34358	9.04264	10.8327	12.3617	13.1705	13.2247	11.3412	-0.09	0.39	0.69	0.26	0.19	0.38	-0.08	0.18	0.15	0.600638	0.0211631	3.9931e-05	0.122585	0.271411	0.0290517	0.622273	0.276694	0.36752	1	1	0.00993005	1	1	0.953464	1	1	0.809802
ENSG00000186111.10	PIP5K1C	1	12	2.54823	2.45914	2.71977	3.11967	2.6885	3.14054	3.14963	3.28245	1.9116	2.62627	3.90497	4.45425	0.11	0.21	0.55	0.25	0.22	0.24	0.29	1.16	1.44	0.787941	0.592697	0.159431	0.527113	0.577288	0.537036	0.456129	0.00319903	0.000233111	1	1	0.869106	1	1	1	1	0.253214	0.017059
ENSG00000244257.5	PKD1P1	1	12	4.69814	3.43076	4.16718	3.76476	1.43846	1.09536	1.46617	2.30935	6.47924	4.42375	3.52255	2.62451	-0.3	-0.06	-0.08	-0.36	0.02	0.6	-0.73	-0.81	-1.03	0.246823	0.817407	0.772848	0.169101	0.949601	0.0241573	0.0052943	0.00197646	8.11864e-05	1	1	1	1	1	0.906615	1	0.205494	0.00958798
ENSG00000142731.11	PLK4	1	12	9.68386	6.43749	4.67976	2.60241	4.51837	5.8582	4.87836	5.25085	11.8809	11.6958	8.5253	5.60239	-0.41	-0.93	-1.65	0.39	0.08	0.17	-0.19	-0.47	-0.84	0.302457	0.0188737	3.04564e-05	0.320863	0.840145	0.674801	0.627407	0.22912	0.0327247	1	1	0.00816299	1	1	1	1	1	0.270463
ENSG00000171566.12	PLRG1	1	12	57.9186	43.7222	43.3909	35.137	52.051	45.5447	44.8058	48.1501	70.103	58.8902	48.5279	27.0058	-0.24	-0.3	-0.48	-0.17	-0.22	-0.18	-0.4	-0.46	-1.08	0.25336	0.151862	0.0223974	0.421926	0.304358	0.406866	0.0568365	0.0291807	2.65821e-07	1	1	0.431526	1	1	1	1	0.673839	0.000246642
ENSG00000138035.15	PNPT1	1	12	35.843	30.2086	29.189	30.0722	20.198	17.6369	17.9139	17.0919	38.8778	36.4224	29.978	19.9445	-0.06	-0.18	0	-0.17	-0.18	-0.31	-0.25	-0.31	-0.68	0.734876	0.333435	0.986686	0.35729	0.325686	0.0984283	0.174992	0.0889508	0.000217472	1	1	1	1	1	1	1	0.924135	0.0163153
ENSG00000152359.15	POC5	1	12	9.41969	7.71067	9.6474	7.77151	5.82825	5.79601	5.22521	6.30648	12.9644	10.8088	6.09344	4.29266	-0.12	0.15	-0.03	0	-0.18	0.03	-0.41	-1.06	-1.38	0.753113	0.676739	0.93653	0.995802	0.622981	0.940891	0.261384	0.00402303	0.000195769	1	1	1	1	1	1	1	0.278815	0.0153746
ENSG00000077514.9	POLD3	1	12	10.396	7.59986	6.0938	3.90193	4.01789	4.06222	3.44303	4.16829	9.76638	10.7396	9.083	6.84066	-0.31	-0.66	-1.17	0.03	-0.24	-0.05	-0.06	-0.07	-0.23	0.339433	0.0416435	0.00028911	0.937507	0.454834	0.88914	0.850823	0.831591	0.48254	1	1	0.0369711	1	1	1	1	1	0.875889
ENSG00000101751.10	POLI	1	12	9.19796	7.51981	8.84462	8.00422	12.8288	12.2554	11.7475	11.2964	23.983	21.7746	16.411	10.458	-0.14	0.06	0.04	-0.03	-0.14	-0.21	-0.29	-0.49	-0.93	0.631662	0.840024	0.89259	0.925938	0.627986	0.476687	0.307326	0.0848383	0.00105825	1	1	1	1	1	1	1	0.908471	0.0413034
ENSG00000240344.9	PPIL3	1	12	11.7041	11.1395	10.8994	10.7617	16.1038	14.1316	14.9097	15.2255	22.1392	21.9522	18.8042	12.2126	0.1	0.01	0.13	-0.16	-0.12	-0.11	-0.18	-0.17	-0.57	0.552675	0.93667	0.463963	0.347107	0.464998	0.542717	0.280722	0.303231	0.000730939	1	1	1	1	1	1	1	1	0.0327944
ENSG00000131013.4	PPIL4	1	12	14.355	11.7473	11.4595	11.1628	8.63003	8.51245	8.20292	8.84357	12.1126	10.9654	10.2747	5.57733	-0.11	-0.21	-0.11	0	-0.08	-0.03	-0.3	-0.16	-0.85	0.528343	0.231246	0.506039	0.98917	0.640914	0.864597	0.0782716	0.352479	7.86441e-07	1	1	1	1	1	1	1	1	0.000438305
ENSG00000138032.21	PPM1B	1	12	10.7786	10.081	9.16663	8.77168	9.78014	9.74615	8.53792	9.17622	22.4922	20.856	16.3008	10.6161	0.07	-0.12	-0.05	0.02	-0.19	-0.18	-0.27	-0.4	-0.81	0.750604	0.578822	0.822887	0.932126	0.36619	0.408553	0.198478	0.0574569	0.000117814	1	1	1	1	1	1	1	0.82515	0.0120003
ENSG00000170836.12	PPM1D	1	12	8.37999	9.48842	14.8004	20.5527	6.37166	11.8717	11.4638	16.6787	10.2437	13.6823	20.9403	16.9342	0.36	0.94	1.54	0.9	0.81	1.33	0.24	1.16	1.06	0.363895	0.0177066	0.000108789	0.0231651	0.0406896	0.000842383	0.539671	0.00365514	0.00747307	1	1	0.0194385	1	1	0.159858	1	0.266337	0.122349
ENSG00000184203.8	PPP1R2	1	12	14.983	14.3055	14.4733	10.7289	19.9703	21.9744	18.7016	21.1051	22.3424	18.835	16.8675	10.0213	0.12	0.07	-0.24	0.17	-0.1	0.03	-0.42	-0.34	-0.89	0.658054	0.786394	0.381943	0.520486	0.70755	0.926221	0.124899	0.213236	0.00107797	1	1	1	1	1	1	1	1	0.0418823
ENSG00000221823.11	PPP3R1	1	12	16.2081	13.6428	13.107	11.8635	15.5316	15.5887	15.2822	14.595	25.5275	23.9284	18.55	12.2229	-0.06	-0.19	-0.21	0.03	-0.04	-0.14	-0.24	-0.42	-0.81	0.788546	0.42616	0.381905	0.891974	0.880814	0.54271	0.295805	0.0756887	0.000524046	1	1	1	1	1	1	1	0.888329	0.0279629
ENSG00000275052.5	PPP4R3B	1	12	21.7861	18.9978	17.7142	15.2955	18.5089	17.1823	16.1718	16.0249	24.1247	20.9012	17.2215	11.0407	-0.04	-0.18	-0.26	-0.08	-0.2	-0.26	-0.36	-0.41	-0.82	0.880578	0.433898	0.26172	0.748385	0.388549	0.261764	0.120757	0.0778821	0.000457365	1	1	0.966021	1	1	1	1	0.89376	0.0258695
ENSG00000101166.16	PRELID3B	1	12	154.248	162.842	175.475	155.605	45.2051	40.0774	36.0924	38.2558	66.0762	57.9498	49.9167	27.0002	0.24	0.3	0.27	-0.15	-0.32	-0.29	-0.34	-0.35	-1.05	0.417774	0.302698	0.359605	0.61244	0.268376	0.323724	0.251202	0.238907	0.000358095	1	1	1	1	1	1	1	1	0.0228741
ENSG00000164306.11	PRIMPOL	1	12	11.1132	8.81329	7.00005	6.32102	7.16484	6.61212	6.44301	6.26448	9.76846	8.8493	7.75687	3.84492	-0.18	-0.56	-0.57	-0.1	-0.16	-0.27	-0.31	-0.27	-1.09	0.455042	0.0226556	0.0190739	0.676415	0.508889	0.290471	0.197256	0.268734	8.74672e-06	1	1	0.400843	1	1	1	1	1	0.00242248
ENSG00000163932.15	PRKCD	1	12	6.6861	6.83299	7.25286	7.72475	2.84382	2.96679	3.03389	3.57878	1.87323	2.48682	2.52673	2.97329	0.19	0.23	0.46	0.08	0.06	0.3	0.24	0.52	0.95	0.425955	0.338346	0.0579477	0.740668	0.8016	0.231636	0.328521	0.0376	0.000119896	1	1	0.64924	1	1	1	1	0.720779	0.0121222
ENSG00000185238.13	PRMT3	1	12	15.8533	14.8124	13.6711	13.3506	12.3681	9.15643	8.8706	7.76042	20.7686	18.4229	15.093	9.59578	0.08	-0.09	0	-0.41	-0.49	-0.72	-0.33	-0.41	-0.85	0.690973	0.627104	0.980693	0.0368607	0.0121977	0.000375849	0.0953126	0.0344467	1.34719e-05	1	1	1	1	1	0.0945814	1	0.697916	0.00290128
ENSG00000183527.12	PSMG1	1	12	37.6599	33.1767	32.5738	27.8577	31.0965	32.601	30.4214	33.8364	75.045	65.8225	51.6911	30.2544	-0.02	-0.09	-0.19	0.08	-0.04	0.04	-0.35	-0.5	-1.02	0.944698	0.723522	0.476957	0.746911	0.891959	0.87565	0.185699	0.0581009	0.000102669	1	1	1	1	1	1	1	0.825265	0.0109768
ENSG00000110536.14	PTPMT1	1	12	22.7397	18.4804	21.6913	20.6843	13.3652	12.8122	12.0909	12.9192	15.3632	13.4367	14.9435	9.03848	-0.13	0.05	0.11	-0.04	-0.15	-0.06	-0.36	0.04	-0.5	0.3708	0.732065	0.431751	0.788992	0.294394	0.693994	0.0123768	0.796515	0.000520749	1	1	1	1	1	1	1	1	0.027937
ENSG00000129317.15	PUS7L	1	12	9.18448	7.70021	8.70619	7.72131	4.40867	4.03232	3.92003	3.23351	10.0611	9.6444	8.22902	4.6248	-0.08	0.04	-0.01	-0.12	-0.17	-0.51	-0.21	-0.24	-0.88	0.761884	0.880762	0.98329	0.652793	0.515291	0.0593505	0.440878	0.361254	0.001008	1	1	1	1	1	1	1	1	0.0398833
ENSG00000130348.11	QRSL1	1	12	6.28799	4.808	5.03841	5.03267	5.58211	4.73497	4.9199	5.09152	7.74948	7.06745	5.91053	4.01821	-0.22	-0.2	-0.08	-0.21	-0.19	-0.18	-0.28	-0.32	-0.68	0.273427	0.30282	0.688983	0.281195	0.328138	0.378594	0.151084	0.106572	0.000570101	1	1	1	1	1	1	1	0.979888	0.0286873
ENSG00000175582.20	RAB6A	1	12	24.1468	19.7593	19.7757	18.1231	19.989	19.5481	18.8738	19.7769	36.2493	30.3088	26.9377	18.5037	-0.11	-0.17	-0.17	-0.01	-0.08	-0.07	-0.4	-0.34	-0.72	0.621184	0.451745	0.46109	0.973794	0.723822	0.756779	0.0736407	0.135569	0.00134845	1	1	1	1	1	1	1	1	0.0486313
ENSG00000100949.14	RABGGTA	1	12	7.43438	7.03145	9.1733	12.0196	8.7789	11.2012	10.6304	12.6636	6.87386	8.21613	9.92876	9.29495	0.09	0.42	0.95	0.38	0.27	0.49	0.08	0.64	0.75	0.719899	0.0821044	9.31785e-05	0.11394	0.267174	0.0451864	0.752158	0.00848122	0.00199205	1	1	0.017698	1	1	1	1	0.400458	0.0601807
ENSG00000113522.14	RAD50	1	12	13.1675	10.3469	12.1804	12.8444	7.84482	7.56114	7.61026	8.39322	23.018	19.7751	15.6419	9.54622	-0.2	0	0.21	-0.03	-0.06	0.04	-0.36	-0.49	-1	0.389917	0.99624	0.360847	0.903502	0.800511	0.879044	0.115241	0.0340632	1.43772e-05	1	1	1	1	1	1	1	0.696645	0.00305262
ENSG00000111247.15	RAD51AP1	1	12	17.2206	13.7451	8.86895	5.70809	5.36034	7.43161	6.23348	8.22612	24.3777	22.3037	18.6134	9.52099	-0.16	-0.84	-1.34	0.47	0.18	0.53	-0.31	-0.36	-1.06	0.655616	0.0182328	0.000158296	0.188255	0.615548	0.142466	0.381239	0.307835	0.00293001	1	1	0.025627	1	1	1	1	1	0.0732503
ENSG00000123728.10	RAP2C	1	12	10.8837	9.75416	10.9543	8.85532	7.50348	7.65135	6.93951	7.03345	14.0077	11.8627	12.1691	6.88498	0.02	0.13	-0.05	0.06	-0.12	-0.14	-0.4	-0.14	-0.76	0.912782	0.499605	0.778938	0.753764	0.523215	0.490011	0.0357247	0.468118	6.54121e-05	1	1	1	1	1	1	1	1	0.00842809
ENSG00000072042.13	RDH11	1	12	20.703	18.5452	22.968	20.8565	31.0781	29.8042	29.2713	30.6496	47.1915	41.9087	34.3625	23.2442	0	0.27	0.26	-0.03	-0.09	-0.07	-0.34	-0.4	-0.74	0.99153	0.175374	0.179906	0.8726	0.646623	0.713829	0.0849834	0.0404082	0.000169987	1	1	0.88541	1	1	1	1	0.744203	0.0145599
ENSG00000133119.13	RFC3	1	12	31.5091	26.456	17.7519	11.9562	10.1265	11.2461	10.2921	10.6287	30.3488	29.131	27.3928	17.3882	-0.07	-0.71	-1.15	0.16	0.01	-0.01	-0.24	-0.11	-0.53	0.810277	0.0155147	8.11014e-05	0.59397	0.986289	0.979707	0.412712	0.697321	0.0691703	1	1	0.0169141	1	1	1	1	1	0.393564
ENSG00000129667.13	RHBDF2	1	12	7.00038	6.73493	7.58575	7.60887	13.7328	14.1444	13.0559	14.7622	11.7572	14.8929	17.5028	15.9602	0.11	0.23	0.37	0.07	-0.08	0.05	0.16	0.69	0.75	0.635333	0.300852	0.101463	0.753501	0.70732	0.819879	0.470177	0.00178101	0.000754326	1	1	0.773361	1	1	1	1	0.192769	0.0329647
ENSG00000103269.14	RHBDL1	1	12	1.73997	1.7059	3.35411	3.50726	3.114	3.66907	3.73488	5.33948	2.34511	2.82972	3.20582	3.32682	0.11	1.06	1.25	0.26	0.25	0.74	0.1	0.54	0.78	0.690307	9.92976e-05	3.6074e-06	0.323399	0.35576	0.00723744	0.702675	0.04382	0.00357139	1	0.055722	0.00177587	1	1	0.522793	1	0.761094	0.0825748
ENSG00000126858.18	RHOT1	1	12	24.0025	19.9003	19.8146	17.4927	13.3585	11.9319	12.2113	10.9302	24.9566	22.6535	15.2846	9.72001	-0.1	-0.16	-0.21	-0.13	-0.13	-0.34	-0.3	-0.67	-1.1	0.722806	0.566769	0.440897	0.635372	0.633375	0.231226	0.272996	0.0152127	7.71551e-05	1	1	1	1	1	1	1	0.507233	0.00937995
ENSG00000140983.14	RHOT2	1	12	53.065	42.7754	51.2017	53.8922	30.4427	30.7491	31.7089	36.0905	26.794	31.2408	36.2929	37.5783	-0.11	0.07	0.27	0.04	0.05	0.19	0.03	0.52	0.76	0.630215	0.77074	0.24619	0.880507	0.835506	0.412721	0.913279	0.0277723	0.00117674	1	1	0.952434	1	1	1	1	0.657995	0.0443202
ENSG00000199347.1	RNU5E-1	1	12	710.889	532.679	497.713	298.874	200.895	187.88	242.548	181.818	965.103	453.651	516.317	225.943	-0.25	-0.4	-1.02	-0.09	0.25	-0.21	-1.17	-0.88	-1.9	0.659117	0.475024	0.0695721	0.875504	0.657464	0.720905	0.0374466	0.117779	0.000718407	1	1	0.692785	1	1	1	1	1	0.0323283
ENSG00000201098.1	RNY1	1	12	528.049	452.395	500.204	441.719	356.16	309.643	426.886	370.703	604.118	299.585	487.846	105.011	-0.11	0.03	0	-0.18	0.25	-0.04	-1.09	-0.24	-2.28	0.868985	0.967532	0.99803	0.778554	0.70112	0.957076	0.0960321	0.71685	0.000533741	1	1	1	1	1	1	1	1	0.0281334
ENSG00000202354.1	RNY3	1	12	973.12	950.268	1056.47	930.199	2231.2	1526.72	2403.78	1285.82	2958.12	1293.17	2358.99	670.912	0.13	0.23	0.18	-0.52	0.09	-0.8	-1.29	-0.26	-1.81	0.781429	0.624423	0.701031	0.268923	0.849915	0.0916555	0.00606358	0.575345	0.000112992	1	1	1	1	1	1	1	1	0.0118848
ENSG00000122484.9	RPAP2	1	12	8.58381	6.7508	7.90026	9.36066	12.2448	12.1448	12.1354	14.0631	16.302	14.4599	14.3876	7.58558	-0.15	0	0.38	0.01	-0.03	0.13	-0.33	-0.11	-0.84	0.487856	0.987101	0.0887733	0.973995	0.890708	0.573544	0.133895	0.604974	0.000163444	1	1	0.744135	1	1	1	1	1	0.0143443
ENSG00000122026.10	RPL21	1	12	935.108	843.734	860.719	868.219	1077.59	936.842	893.66	945.616	911.798	855.327	963.923	541.657	0.03	0	0.14	-0.17	-0.27	-0.24	-0.26	0.16	-0.47	0.809961	0.999695	0.308322	0.21441	0.0483132	0.0830908	0.0588295	0.262724	0.000677144	1	1	0.985554	1	1	1	1	1	0.0309332
ENSG00000163584.18	RPL22L1	1	12	234.267	194.987	185.798	173.93	421.609	442.217	386.134	413.77	346.799	312.366	265.769	130.278	-0.08	-0.22	-0.18	0.09	-0.13	-0.09	-0.27	-0.31	-1.19	0.80821	0.510151	0.581468	0.779037	0.700449	0.777645	0.417429	0.350401	0.000289287	1	1	1	1	1	1	1	1	0.0200046
ENSG00000108107.15	RPL28	1	12	539.371	486.893	540.22	570.251	598.159	523.179	496.134	557.246	363.017	444.417	383.472	428.807	0.03	0.12	0.33	-0.17	-0.27	-0.16	0.11	0.17	0.5	0.838055	0.427649	0.02885	0.27706	0.073475	0.297561	0.467909	0.276281	0.00105601	1	1	0.48917	1	1	1	1	1	0.0413034
ENSG00000241343.10	RPL36A	1	12	1325.44	1302.07	1233.96	1229.37	1084.42	1075.91	1030.92	1135.37	751.101	614.171	686.758	397.723	0.14	0.01	0.14	0.01	-0.08	0.01	-0.44	-0.07	-0.67	0.448016	0.942206	0.463399	0.94071	0.687179	0.970355	0.0205392	0.720694	0.000398236	1	1	1	1	1	1	1	1	0.0242073
ENSG00000085721.13	RRN3	1	12	26.4326	21.5348	27.3635	27.842	18.6371	19.0914	17.3178	18.5577	35.3576	30.0116	27.7208	18.553	-0.13	0.17	0.32	0.06	-0.11	-0.06	-0.39	-0.29	-0.65	0.441675	0.322176	0.0580219	0.714107	0.522352	0.749304	0.0203651	0.0852971	0.000129883	1	1	0.649468	1	1	1	1	0.910267	0.0125425
ENSG00000137876.11	RSL24D1	1	12	216.488	182.181	158.238	126.462	132.3	110.701	99.6931	97.9199	150.066	126.852	102.45	51.7514	-0.08	-0.34	-0.53	-0.23	-0.41	-0.49	-0.4	-0.49	-1.29	0.667488	0.0828384	0.00615059	0.243853	0.0346445	0.0117356	0.0413249	0.0118496	2.85069e-11	1	1	0.232097	1	1	0.682061	1	0.448585	1.43247e-07
ENSG00000182552.15	RWDD4	1	12	23.099	19.8559	23.1607	23.3396	14.7053	13.9607	13.8097	14.9216	23.5476	20.4526	20.8826	12.079	-0.04	0.12	0.27	-0.06	-0.09	-0.03	-0.37	-0.11	-0.67	0.818588	0.518538	0.161026	0.766898	0.617823	0.893587	0.0504263	0.57331	0.000430012	1	1	0.871976	1	1	1	1	1	0.0254475
ENSG00000267534.4	S1PR2	1	12	9.34362	6.87261	7.5345	6.3059	1.68439	1.57722	1.61407	1.82571	2.45464	2.96665	3.63132	3.89891	-0.27	-0.19	-0.33	-0.06	-0.07	0.05	0.1	0.66	0.92	0.275349	0.424932	0.181066	0.80482	0.78896	0.846304	0.678644	0.00686714	0.000174999	1	1	0.887551	1	1	1	1	0.367862	0.0145752
ENSG00000225953.3	SATB2-AS1	1	12	2.43941	2.19186	2.08758	1.74124	1.73474	1.87114	1.47261	1.88796	4.26363	3.40886	2.88674	1.33091	0	-0.11	-0.24	0.14	-0.24	0.03	-0.47	-0.49	-1.35	0.994599	0.782172	0.559672	0.722785	0.552676	0.943998	0.243683	0.223649	0.000787416	1	1	1	1	1	1	1	1	0.0338868
ENSG00000100241.21	SBF1	1	12	16.5166	13.5751	14.5869	13.8088	16.7776	15.8277	16.3144	17.4263	13.3311	16.9259	19.451	19.7478	-0.11	-0.06	-0.01	-0.06	-0.05	0.01	0.16	0.64	0.84	0.534084	0.728084	0.952669	0.722254	0.770236	0.976925	0.372149	0.000208948	1.37175e-06	1	1	1	1	1	1	1	0.0604117	0.000646222
ENSG00000198794.12	SCAMP5	1	12	1.73065	2.09356	3.04292	3.70556	1.26024	1.38353	1.68504	1.40451	1.4317	2.15836	4.77238	4.59362	0.4	0.93	1.35	0.17	0.4	0.17	0.44	1.93	1.98	0.469831	0.0946879	0.014655	0.766019	0.472718	0.757338	0.426566	0.00048997	0.000342109	1	1	0.352452	1	1	1	1	0.100401	0.0222353
ENSG00000284194.3	SCO2	1	12	5.0677	4.71528	8.07426	9.73873	12.2724	11.9153	12.1456	13.3756	13.1341	13.8419	20.3613	16.3452	0.05	0.79	1.2	-0.02	-0.02	0.07	-0.11	0.73	0.56	0.843699	0.00245113	4.04658e-06	0.934712	0.924834	0.778212	0.677356	0.00412507	0.0301541	1	0.475234	0.00187715	1	1	1	1	0.279243	0.258499
ENSG00000121064.13	SCPEP1	1	12	12.7278	12.2992	14.6	16.8183	10.3752	14.2301	13.3136	16.7665	29.2134	30.0992	35.5867	28.1221	0.12	0.32	0.66	0.48	0.35	0.63	-0.12	0.38	0.21	0.516284	0.091161	0.000428078	0.0107527	0.057506	0.000964149	0.504018	0.0393111	0.262277	1	1	0.0466716	1	1	0.179206	1	0.734247	0.71387
ENSG00000180900.20	SCRIB	1	12	24.0264	21.0686	25.5735	26.8661	24.3479	28.2097	27.44	28.5619	16.2127	22.6983	26.4674	26.3678	-0.02	0.21	0.41	0.24	0.17	0.2	0.28	0.8	0.99	0.938888	0.395242	0.0968889	0.335406	0.499885	0.420898	0.250769	0.00119513	5.53232e-05	1	1	0.764596	1	1	1	1	0.156673	0.00765135
ENSG00000136021.19	SCYL2	1	12	24.0842	19.2335	19.8547	18.1203	12.1283	12.485	11.5831	12.1527	28.8653	23.4832	16.8559	11.3062	-0.13	-0.16	-0.17	0.06	-0.07	-0.06	-0.43	-0.72	-1.1	0.680832	0.60868	0.584647	0.836534	0.822344	0.85626	0.164135	0.0202588	0.0003717	1	1	1	1	1	1	1	0.574708	0.0232703
ENSG00000132581.10	SDF2	1	12	15.7475	14.5033	19.8864	22.282	20.2206	23.1826	22.6975	26.3951	16.9948	18.1642	21.4789	17.0812	0.04	0.45	0.75	0.22	0.16	0.33	-0.09	0.43	0.29	0.822811	0.0179962	7.96993e-05	0.245422	0.399995	0.0849236	0.645838	0.0241731	0.125513	1	1	0.0168641	1	1	1	1	0.623657	0.52226
ENSG00000093183.14	SEC22C	1	12	16.0681	14.0122	13.9551	10.9788	9.93822	10.7835	10.1423	10.8783	20.2151	18.7897	16.0414	10.4981	-0.02	-0.08	-0.31	0.14	0.02	0.07	-0.28	-0.27	-0.67	0.918166	0.651852	0.0993395	0.440846	0.910204	0.701282	0.131347	0.14095	0.000285885	1	1	0.770385	1	1	1	1	1	0.0198605
ENSG00000012171.20	SEMA3B	1	12	68.8941	61.1184	64.9072	64.1136	2.651	7.71549	7.1949	15.9406	15.9254	14.7766	13.5556	11.4509	0.03	0.04	0.14	1.55	1.39	2.54	-0.28	-0.11	-0.16	0.942991	0.938205	0.764123	0.00129897	0.00371687	1.32548e-07	0.55242	0.818971	0.74506	1	1	1	1	1	0.000239796	1	1	0.957869
ENSG00000167680.17	SEMA6B	1	12	13.6132	12.4079	14.3945	12.5895	11.4367	10.8618	10.2511	10.6537	7.2286	10.7069	10.511	12.8884	0.04	0.2	0.14	-0.05	-0.16	-0.15	0.38	0.64	1.07	0.847254	0.376651	0.543853	0.817629	0.469034	0.498614	0.0900045	0.00481159	2.30354e-06	1	1	1	1	1	1	1	0.302239	0.000938539
ENSG00000186522.15	SEPTIN10	1	12	20.7521	15.7799	11.3121	9.2628	21.1845	20.851	20.1797	19.8987	40.4488	39.6903	29.8553	19.8451	-0.24	-0.76	-0.92	0	-0.08	-0.14	-0.19	-0.38	-0.74	0.323951	0.00158511	0.000136602	0.985299	0.75477	0.556586	0.430711	0.115079	0.00198671	1	0.380666	0.0238777	1	1	1	1	1	0.0601807
ENSG00000120742.11	SERP1	1	12	78.7635	63.9862	61.9415	57.978	112.292	98.9561	88.9113	93.3642	78.2502	65.6877	53.7493	32.881	-0.12	-0.23	-0.2	-0.15	-0.33	-0.31	-0.41	-0.52	-1.03	0.703883	0.478168	0.543789	0.648873	0.30221	0.328917	0.205594	0.108212	0.00140259	1	1	1	1	1	1	1	0.982887	0.0496339
ENSG00000080546.13	SESN1	1	12	6.74332	7.80625	15.8629	18.186	17.3182	24.9106	25.1911	31.707	7.03342	11.1294	15.7542	13.0641	0.39	1.36	1.69	0.55	0.52	0.83	0.5	1.28	1.21	0.332416	0.00078111	3.13635e-05	0.171835	0.197312	0.0408766	0.220572	0.00160931	0.00274621	1	0.252345	0.00822336	1	1	1	1	0.182614	0.0710104
ENSG00000099381.18	SETD1A	1	12	2.3779	2.12609	2.14562	2.32051	2.83736	2.53807	2.59588	2.36899	2.63596	3.87078	4.00719	4.52145	0.01	-0.03	0.22	-0.14	-0.15	-0.28	0.39	0.72	1.1	0.974539	0.926206	0.460585	0.634964	0.606415	0.353599	0.185227	0.0138234	0.000168452	1	1	1	1	1	1	1	0.486787	0.0145162
ENSG00000144040.13	SFXN5	1	12	5.24749	4.21956	5.48177	4.75515	2.18482	2.69532	2.59901	2.41336	7.14785	8.79123	10.0342	10.7163	-0.15	0.18	0.11	0.33	0.25	0.11	0.13	0.6	0.85	0.464837	0.375928	0.579971	0.11749	0.240235	0.62081	0.515115	0.00359576	3.28963e-05	1	1	1	1	1	1	1	0.266337	0.00522012
ENSG00000126821.8	SGPP1	1	12	6.26446	5.94096	6.02609	4.49278	10.5182	12.0043	10.9191	13.2361	16.4236	12.9168	9.78028	5.70344	0.09	0.06	-0.24	0.21	0.04	0.27	-0.5	-0.72	-1.26	0.732131	0.819033	0.388664	0.442613	0.874199	0.333376	0.0641589	0.0087093	3.65768e-06	1	1	1	1	1	1	1	0.400476	0.00131285
ENSG00000160691.19	SHC1	1	12	79.7297	69.9968	107.914	115.229	62.3071	77.2646	68.9468	89.9786	117.927	145.625	195.138	180.486	-0.02	0.55	0.79	0.34	0.13	0.48	0.13	0.85	0.88	0.930979	0.0268823	0.00167813	0.175941	0.594776	0.0554695	0.614503	0.000705816	0.000409739	1	1	0.116543	1	1	1	1	0.116383	0.0247072
ENSG00000108061.12	SHOC2	1	12	14.6954	12.7337	13.7678	13.3395	13.9871	14.2941	14.4366	15.1771	11.0009	10.5477	9.96155	6.4194	-0.04	0.02	0.1	0.06	0.03	0.06	-0.21	-0.05	-0.51	0.778765	0.883654	0.49324	0.708356	0.836921	0.709485	0.179699	0.747296	0.000941618	1	1	1	1	1	1	1	1	0.0382772
ENSG00000181788.4	SIAH2	1	12	16.6895	15.0382	12.5922	11.2193	14.5369	13.0838	12.2137	12.6901	20.9385	16.4667	11.3829	7.33406	0.04	-0.29	-0.33	-0.13	-0.25	-0.25	-0.49	-0.84	-1.28	0.899949	0.384252	0.316321	0.699043	0.442204	0.447281	0.135665	0.0108017	0.000105445	1	1	0.988349	1	1	1	1	0.437618	0.0111942
ENSG00000154839.10	SKA1	1	12	9.96001	6.36747	4.62368	3.26329	3.79844	4.50481	4.12758	5.00306	20.4924	16.9738	12.401	6.05093	-0.48	-0.99	-1.37	0.23	0.09	0.31	-0.43	-0.7	-1.45	0.271269	0.0229631	0.00164712	0.600881	0.843353	0.484876	0.321322	0.109772	0.000864596	1	1	0.1155	1	1	1	1	0.985865	0.0361406
ENSG00000157933.10	SKI	1	12	10.0692	8.14512	8.76504	7.61266	8.60389	6.64598	8.01569	7.53259	5.01248	8.40802	7.10015	8.49442	-0.12	-0.08	-0.15	-0.34	-0.12	-0.25	0.58	0.57	0.98	0.667285	0.771385	0.58959	0.236792	0.680054	0.389982	0.0434134	0.0470391	0.000583195	1	1	1	1	1	1	1	0.771532	0.0286873
ENSG00000113504.21	SLC12A7	1	12	7.54205	5.70315	6.7938	6.38867	2.64479	2.5118	2.6648	2.82988	3.74556	4.49889	5.67654	7.18527	-0.22	-0.03	0	-0.06	-0.03	0.05	0.1	0.71	1.18	0.499458	0.917716	0.997614	0.860714	0.932857	0.882318	0.762647	0.0322618	0.000364451	1	1	1	1	1	1	1	0.6816	0.0231245
ENSG00000164933.12	SLC25A32	1	12	25.3563	21.3066	23.5046	21.1441	22.704	21.1386	19.2117	20.7454	21.4144	19.0559	15.8036	10.7002	-0.09	0.01	-0.01	-0.08	-0.25	-0.19	-0.34	-0.4	-0.74	0.671102	0.973442	0.954913	0.718623	0.249579	0.384015	0.115594	0.0619297	0.000558392	1	1	1	1	1	1	1	0.844209	0.0286873
ENSG00000136868.11	SLC31A1	1	12	16.534	12.7806	12.1211	8.93861	7.48184	7.1847	6.78929	8.0012	28.4902	24.7298	19.0373	12.5282	-0.22	-0.33	-0.65	-0.03	-0.15	0.02	-0.35	-0.5	-0.93	0.376416	0.181546	0.0100087	0.904234	0.556297	0.937619	0.163676	0.0464428	0.00019893	1	1	0.297718	1	1	1	1	0.76808	0.0154294
ENSG00000141424.13	SLC39A6	1	12	21.2399	23.6279	28.6159	30.4006	29.8881	33.1877	31.5889	42.066	22.8239	22.8011	23.3377	16.9752	0.33	0.55	0.77	0.17	0.08	0.43	-0.16	0.12	-0.18	0.130222	0.0120038	0.000420823	0.432279	0.722856	0.0525682	0.470314	0.592098	0.421291	1	0.981639	0.0461413	1	1	1	1	1	0.846568
ENSG00000163798.13	SLC4A1AP	1	12	11.7432	9.63571	9.51813	9.12936	6.31536	6.71263	6.13306	7.00737	17.0966	15.3072	12.9469	9.75769	-0.11	-0.18	-0.12	0.11	-0.05	0.08	-0.33	-0.33	-0.54	0.44264	0.192686	0.411811	0.447194	0.728519	0.57165	0.0172767	0.0183811	0.000124018	1	1	1	1	1	1	1	0.552636	0.0121314
ENSG00000139514.13	SLC7A1	1	12	13.2241	9.98414	8.8062	6.04183	12.2751	9.55332	9.97029	8.28514	20.2137	17.7772	11.7842	8.17209	-0.25	-0.47	-0.89	-0.33	-0.31	-0.63	-0.33	-0.71	-1.05	0.402588	0.119249	0.00334409	0.271871	0.303071	0.0401148	0.273262	0.0187305	0.000538954	1	1	0.170542	1	1	1	1	0.556798	0.0282708
ENSG00000166949.16	SMAD3	1	12	14.6692	13.7469	11.9236	11.2289	34.7424	37.4673	38.166	40.5157	2.11643	3.03488	7.42324	8.59819	0.12	-0.17	-0.14	0.13	0.12	0.15	0.35	1.98	2.22	0.841672	0.779965	0.824131	0.840111	0.847519	0.812556	0.58081	0.00149571	0.000368575	1	1	1	1	1	1	1	0.174508	0.023248
ENSG00000141646.14	SMAD4	1	12	26.1824	21.7677	21.1991	20.7692	26.3154	27.5153	28.5668	31.2917	45.8564	41.8	31.9986	21.4276	-0.08	-0.19	-0.09	0.08	0.1	0.18	-0.31	-0.47	-0.81	0.730008	0.429526	0.70367	0.731418	0.660726	0.434718	0.183428	0.0449054	0.000575244	1	1	1	1	1	1	1	0.766157	0.0286873
ENSG00000108055.10	SMC3	1	12	28.388	22.4169	17.5365	15.7631	12.171	10.5219	9.72155	9.32515	23.3346	22.6084	19.5857	11.3651	-0.15	-0.58	-0.6	-0.2	-0.32	-0.44	-0.21	-0.19	-0.76	0.486581	0.00951013	0.00654152	0.38008	0.144811	0.0501288	0.347197	0.384052	0.000618692	1	0.889918	0.239809	1	1	1	1	1	0.0297031
ENSG00000224531.6	SMIM13	1	12	8.48832	7.61889	6.83493	5.90306	6.80847	6.59879	5.64474	5.95494	16.98	13.708	12.2278	7.48558	0.02	-0.19	-0.28	-0.03	-0.27	-0.24	-0.45	-0.41	-0.91	0.912539	0.372868	0.196804	0.907043	0.204172	0.269463	0.0349198	0.0575645	2.4617e-05	1	1	0.90232	1	1	1	1	0.82515	0.00431512
ENSG00000232388.5	SMIM26	1	12	100.161	85.7974	98.4807	96.6226	67.3191	65.0166	57.137	62.8901	81.6813	64.6205	63.4131	34.4503	-0.03	0.1	0.19	-0.02	-0.23	-0.16	-0.47	-0.29	-0.96	0.91414	0.727461	0.482869	0.943278	0.415568	0.57976	0.0875234	0.296088	0.000572357	1	1	1	1	1	1	1	1	0.0286873
ENSG00000165684.4	SNAPC4	1	12	3.11059	2.82804	4.01119	4.56181	4.42279	4.39466	4.09979	4.44491	3.19055	4.34292	5.0985	5.61501	0.02	0.48	0.81	0.02	-0.12	-0.03	0.25	0.77	1.1	0.951219	0.0865075	0.00403296	0.929706	0.669588	0.916958	0.375678	0.00606616	8.68771e-05	1	1	0.189267	1	1	1	1	0.343864	0.00999749
ENSG00000204387.14	SNHG32	1	12	214.246	162.666	164.813	175.139	193.519	148.629	148.444	136.425	444.45	344.583	272.091	160.379	-0.25	-0.26	-0.05	-0.35	-0.38	-0.56	-0.51	-0.64	-1.16	0.41534	0.381884	0.865591	0.249866	0.204397	0.0677176	0.0949102	0.0346854	0.000120618	1	1	1	1	1	1	1	0.698724	0.0121222
ENSG00000064652.11	SNX24	1	12	25.7589	22.016	17.4597	14.9602	7.97656	6.04233	6.79835	5.27154	15.1492	13.4304	11.1755	5.96233	-0.03	-0.44	-0.54	-0.38	-0.23	-0.64	-0.32	-0.39	-1.08	0.916786	0.146987	0.0755321	0.210081	0.446203	0.0432706	0.292751	0.206521	0.000427093	1	1	0.711876	1	1	1	1	1	0.0254475
ENSG00000184557.4	SOCS3	1	12	5.08779	4.35185	2.11911	1.61878	8.75387	7.63148	6.30539	6.86536	21.97	23.2002	17.4379	16.162	-0.03	-1.15	-1.4	-0.15	-0.46	-0.39	-0.1	-0.31	-0.17	0.928108	0.00039016	1.50184e-05	0.643191	0.150194	0.233391	0.755298	0.341044	0.597792	1	0.162889	0.00503158	1	1	1	1	1	0.920409
ENSG00000120896.13	SORBS3	1	12	6.20871	4.95684	4.42407	4.13209	7.07087	7.37295	6.52082	7.13279	6.68231	9.56378	9.67379	9.60801	-0.13	-0.37	-0.34	0.09	-0.12	-0.02	0.32	0.63	0.78	0.571608	0.123212	0.157937	0.69375	0.599594	0.931263	0.17577	0.00841542	0.000976139	1	1	0.865228	1	1	1	1	0.399596	0.0390326
ENSG00000172845.17	SP3	1	12	26.3196	24.8164	24.4827	24.3286	23.9331	25.2057	23.6924	26.2163	58.8579	52.3203	45.5935	29.2793	0.09	0.01	0.14	0.1	-0.03	0.07	-0.34	-0.31	-0.75	0.47885	0.911782	0.293246	0.449133	0.83698	0.594134	0.00924897	0.0176957	6.83396e-09	1	1	0.982981	1	1	1	1	0.5405	1.47174e-05
ENSG00000197912.16	SPG7	1	12	17.4666	14.7032	21.2603	19.6727	23.9277	25.4639	26.6027	26.2181	25.3998	31.5325	38.772	37.1004	-0.08	0.4	0.43	0.12	0.14	0.08	0.14	0.72	0.79	0.731059	0.0951746	0.0773065	0.621258	0.555394	0.741659	0.569772	0.00283425	0.00106032	1	1	0.717261	1	1	1	1	0.244162	0.0413034
ENSG00000164808.17	SPIDR	1	12	17.4609	15.7085	11.6415	10.785	12.273	8.82298	9.20801	6.09247	18.6525	20.4169	16.0494	13.7844	0.02	-0.47	-0.45	-0.44	-0.41	-1.08	-0.03	-0.16	-0.16	0.931338	0.0189513	0.0252556	0.0283357	0.0411317	2.12377e-07	0.877283	0.426737	0.424215	1	1	0.458999	1	1	0.000320182	1	1	0.847138
ENSG00000106723.17	SPIN1	1	12	15.3891	12.6053	10.125	8.8106	14.0622	14.2444	14.4747	14.9481	25.0668	25.0756	18.7668	12.4977	-0.11	-0.49	-0.56	0.03	0.04	0.03	-0.16	-0.36	-0.72	0.622175	0.0252684	0.0100962	0.890099	0.866906	0.902516	0.4712	0.0972335	0.000910566	1	1	0.298449	1	1	1	1	0.954073	0.0375049
ENSG00000263465.4	SRSF8	1	12	14.367	18.8502	24.5525	33.3204	17.1091	16.9121	16.1614	17.012	17.4662	16.273	19.3822	13.4804	0.58	0.9	1.46	0	-0.1	-0.04	-0.28	0.24	-0.04	0.075247	0.00554571	6.07851e-06	0.990216	0.762149	0.891753	0.391223	0.463851	0.896364	1	0.695975	0.00266592	1	1	1	1	1	0.985541
ENSG00000172830.13	SSH3	1	12	3.90665	3.52984	4.90515	6.10617	2.48653	3.45819	2.78067	3.4977	3.69273	5.78275	5.24657	6.27221	0.03	0.45	0.89	0.47	0.15	0.42	0.45	0.62	1.03	0.931976	0.153892	0.0043595	0.136358	0.631397	0.193971	0.152005	0.0489095	0.000971236	1	1	0.197388	1	1	1	1	0.776733	0.0389695
ENSG00000115145.10	STAM2	1	12	8.59126	5.90707	7.54451	7.32726	7.82382	8.55006	8.12271	9.3323	11.3295	10.4582	9.33461	5.42673	-0.39	-0.07	0.01	0.15	0.05	0.2	-0.27	-0.2	-0.81	0.113587	0.768436	0.954634	0.527351	0.845211	0.413078	0.268361	0.422347	0.000925939	1	1	1	1	1	1	1	1	0.037828
ENSG00000115107.20	STEAP3	1	12	1.84985	1.9345	3.15083	3.46422	45.1575	40.1035	38.9217	39.8759	5.06868	6.26059	14.8626	12.3396	0.23	0.89	1.16	-0.14	-0.22	-0.23	0.14	1.71	1.5	0.6225	0.0601024	0.0137974	0.768032	0.645508	0.627771	0.771136	0.000259746	0.00136857	1	1	0.342407	1	1	1	1	0.0693949	0.0490983
ENSG00000117632.23	STMN1	1	12	120.008	107.818	74.1862	47.5138	53.1808	61.5507	54.9386	66.7167	151.525	150.672	133.206	90.7946	0.02	-0.58	-1.09	0.2	0.02	0.24	-0.2	-0.15	-0.47	0.951686	0.0519264	0.000228508	0.493636	0.950235	0.421117	0.510085	0.616005	0.110186	1	1	0.03281	1	1	1	1	1	0.49216
ENSG00000197457.10	STMN3	1	12	2.32596	2.79053	2.42601	2.45307	4.82906	4.90501	4.41559	5.07308	1.73062	2.59235	5.27915	8.98721	0.43	0.18	0.33	0.06	-0.11	0.01	0.41	1.75	2.52	0.530172	0.795624	0.63025	0.934178	0.866938	0.991898	0.545624	0.010709	0.000238054	1	1	1	1	1	1	1	0.437618	0.0170888
ENSG00000196562.14	SULF2	1	12	16.1277	14.2987	22.4318	29.139	4.32304	7.50782	6.92141	11.5244	5.24259	9.4273	19.7182	19.0632	-0.02	0.59	1.11	0.82	0.65	1.38	0.69	2.13	2.21	0.977121	0.319151	0.0613518	0.166099	0.273351	0.0204376	0.245109	0.000337167	0.000195018	1	1	0.663348	1	1	0.85474	1	0.0827471	0.0153746
ENSG00000116030.17	SUMO1	1	12	62.18	55.8492	54.6637	50.2524	66.8328	67.2938	60.588	68.8395	130.828	118.841	108.582	68.649	0.04	-0.06	-0.06	0.03	-0.14	-0.02	-0.3	-0.2	-0.68	0.86139	0.756077	0.787892	0.883131	0.494593	0.912834	0.15631	0.332806	0.00116257	1	1	1	1	1	1	1	1	0.0441642
ENSG00000273841.5	TAF9	1	12	65.8892	61.0884	62.5235	61.521	59.6305	63.7926	59.5731	70.6537	104.118	98.16	80.575	48.1662	0.09	0.05	0.15	0.12	-0.01	0.19	-0.25	-0.29	-0.83	0.697781	0.847637	0.534191	0.61597	0.961324	0.433891	0.305772	0.221525	0.000526796	1	1	1	1	1	1	1	1	0.0279629
ENSG00000169762.17	TAPT1	1	12	17.5265	15.7006	13.1326	10.8942	7.13188	6.65452	6.94082	5.40653	10.218	9.92552	8.31918	5.34316	0.02	-0.3	-0.44	-0.06	-0.06	-0.4	-0.21	-0.21	-0.65	0.929079	0.108159	0.0187862	0.733062	0.754632	0.0382456	0.248787	0.271049	0.000500636	1	1	0.39926	1	1	1	1	1	0.0273445
ENSG00000113407.14	TARS1	1	12	123.14	102.11	92.4048	74.6222	100.834	88.4129	82.7633	81.7061	85.3439	73.5362	58.5139	28.7985	-0.1	-0.3	-0.48	-0.16	-0.28	-0.36	-0.36	-0.47	-1.29	0.576733	0.0923763	0.00708936	0.374961	0.110423	0.0429129	0.0413549	0.00793515	4.44805e-13	1	1	0.249285	1	1	1	1	0.390662	3.35272e-09
ENSG00000147687.19	TATDN1	1	12	72.7571	56.1663	61.8064	56.7766	44.4735	37.094	34.6452	35.2089	47.7747	44.5653	33.4725	19.0267	-0.2	-0.12	-0.12	-0.23	-0.36	-0.39	-0.24	-0.46	-1.11	0.55056	0.718943	0.724027	0.487916	0.279818	0.240699	0.468633	0.165949	0.000747936	1	1	1	1	1	1	1	1	0.0329647
ENSG00000187735.14	TCEA1	1	12	129.559	83.7594	56.5641	40.8429	64.725	50.4377	45.9083	42.9205	177.441	142.646	89.6818	55.5363	-0.49	-1.09	-1.43	-0.33	-0.49	-0.65	-0.44	-0.91	-1.46	0.265433	0.0131339	0.00107525	0.451622	0.261798	0.135061	0.319135	0.0365223	0.000847773	1	1	0.088523	1	1	1	1	0.71308	0.0356988
ENSG00000145022.4	TCTA	1	12	2.66562	2.89481	3.88304	5.37783	4.56619	5.09444	4.64828	5.649	10.7249	9.79465	9.25825	8.15425	0.29	0.66	1.27	0.17	0.03	0.24	-0.29	-0.1	-0.07	0.409599	0.0655937	0.000349805	0.633262	0.940048	0.502606	0.409125	0.770657	0.838331	1	1	0.04219	1	1	1	1	1	0.973478
ENSG00000137492.8	THAP12	1	12	28.8526	23.5123	22.2199	21.1199	21.5965	19.532	18.4417	18.9635	27.5903	26.1351	21.4961	12.9652	-0.12	-0.26	-0.21	-0.12	-0.23	-0.25	-0.24	-0.31	-0.8	0.616053	0.282549	0.393901	0.605316	0.336189	0.306929	0.311871	0.192531	0.000988565	1	1	1	1	1	1	1	1	0.0393209
ENSG00000173451.7	THAP2	1	12	4.47645	3.59455	3.72212	3.53477	2.71136	2.44613	2.98898	2.49066	7.45286	6.05587	4.92405	2.50967	-0.12	-0.15	-0.1	-0.13	0.13	-0.18	-0.45	-0.57	-1.29	0.754307	0.703057	0.804812	0.732932	0.739554	0.65897	0.239415	0.140956	0.000815222	1	1	1	1	1	1	1	1	0.0348143
ENSG00000169231.13	THBS3	1	12	9.49137	10.1104	16.3626	15.8413	2.7245	2.98624	2.91306	3.29879	24.3003	29.2223	21.9278	18.1508	0.27	0.91	1	0.16	0.09	0.25	0.07	-0.07	-0.12	0.271505	0.000242334	5.19223e-05	0.51011	0.727623	0.322392	0.7636	0.770698	0.61386	1	0.113383	0.0122827	1	1	1	1	1	0.925
ENSG00000185875.13	THNSL1	1	12	2.05081	1.85345	2.75068	3.01578	2.91485	2.76773	2.41067	2.58611	3.27485	3.07974	3.18871	1.79284	0.01	0.54	0.8	-0.06	-0.27	-0.21	-0.24	0.05	-0.6	0.961225	0.0135547	0.00024485	0.799761	0.209214	0.345851	0.274304	0.835095	0.00558959	1	1	0.0337418	1	1	1	1	1	0.10495
ENSG00000100575.14	TIMM9	1	12	19.3914	16.2897	15.9918	16.4222	22.575	17.425	17.6319	13.9258	37.3533	31.2177	23.6	14.9812	-0.07	-0.16	0	-0.33	-0.36	-0.72	-0.4	-0.62	-1.06	0.824131	0.606035	0.991519	0.285254	0.242894	0.0230255	0.197478	0.0459681	0.000614831	1	1	1	1	1	0.885048	1	0.767292	0.0296121
ENSG00000143155.13	TIPRL	1	12	59.0503	50.9749	59.5391	55.5342	20.393	19.167	17.6611	20.0122	36.7096	32.1236	26.764	17.1344	-0.03	0.13	0.16	-0.07	-0.21	-0.08	-0.35	-0.39	-0.8	0.91367	0.579748	0.507292	0.765138	0.375097	0.729	0.14534	0.0978376	0.000700864	1	1	1	1	1	1	1	0.954674	0.0317283
ENSG00000162604.12	TM2D1	1	12	54.205	45.8178	55.6157	48.1754	53.8024	58.933	54.0085	54.3498	42.8604	37.8311	31.2885	21.8964	-0.09	0.15	0.08	0.16	0	-0.03	-0.33	-0.38	-0.72	0.686899	0.486626	0.724522	0.468321	0.992664	0.883153	0.1364	0.0826837	0.00116599	1	1	1	1	1	1	1	0.901098	0.0441642
ENSG00000198498.10	TMA16	1	12	25.7257	20.0589	18.6456	16.6586	24.1923	20.8823	19.8178	18.4433	30.5088	27.0956	25.986	14.1282	-0.19	-0.35	-0.38	-0.2	-0.3	-0.45	-0.33	-0.17	-0.85	0.352122	0.0884464	0.0644417	0.337484	0.145453	0.0337477	0.102613	0.403779	3.05755e-05	1	1	0.675083	1	1	1	1	1	0.00501006
ENSG00000117500.13	TMED5	1	12	26.7963	23.0975	24.6633	21.2906	29.4191	31.5493	28.763	32.4267	40.4193	33.7611	27.5234	16.1822	-0.02	0	-0.09	0.13	-0.04	0.09	-0.42	-0.52	-1.03	0.932274	0.99754	0.769524	0.650355	0.899391	0.769412	0.149937	0.0792127	0.000468524	1	1	1	1	1	1	1	0.894279	0.0258719
ENSG00000106460.19	TMEM106B	1	12	29.4787	23.3638	30.1589	27.298	36.2972	29.3719	32.1521	31.1457	10.0712	8.14469	7.77011	4.31713	-0.18	0.15	0.13	-0.28	-0.17	-0.27	-0.45	-0.29	-0.98	0.526218	0.59765	0.640201	0.31553	0.552147	0.332347	0.111221	0.298164	0.000503207	1	1	1	1	1	1	1	1	0.0273857
ENSG00000171202.7	TMEM126A	1	12	40.9813	33.9862	36.4247	34.0976	22.6846	21.5799	20.1551	24.0219	25.2053	20.7163	19.5639	8.06156	-0.07	-0.05	-0.02	-0.05	-0.17	0.02	-0.43	-0.31	-1.32	0.871146	0.907023	0.957965	0.899414	0.682091	0.957181	0.287152	0.440897	0.00110251	1	1	1	1	1	1	1	1	0.0425074
ENSG00000185475.11	TMEM179B	1	12	26.9619	29.3111	36.5991	46.52	36.4528	39.5709	34.1672	46.2545	25.9434	26.3332	24.8952	19.0897	0.28	0.56	1.05	0.14	-0.09	0.29	-0.13	0.03	-0.18	0.331876	0.0524168	0.000266959	0.615821	0.755809	0.317457	0.654305	0.923491	0.526734	1	1	0.0353511	1	1	1	1	1	0.893371
ENSG00000151881.15	TMEM267	1	12	7.06104	5.51179	5.90699	5.65859	7.55276	6.60037	5.9776	6.54233	14.3924	11.5292	9.16399	4.46822	-0.22	-0.15	-0.07	-0.16	-0.33	-0.29	-0.44	-0.57	-1.4	0.506293	0.65736	0.821868	0.614563	0.311251	0.397161	0.172972	0.0832823	1.82292e-05	1	1	1	1	1	1	1	0.901149	0.00369371
ENSG00000112697.17	TMEM30A	1	12	34.7453	37.5715	52.0963	52.9054	88.8149	97.378	88.4755	104.439	18.239	18.4089	18.8398	14.515	0.28	0.7	0.86	0.16	-0.01	0.17	-0.15	0.12	-0.03	0.232537	0.00295826	0.000289675	0.497553	0.971743	0.459406	0.525831	0.624994	0.892697	1	0.528147	0.0369711	1	1	1	1	1	0.984666
ENSG00000103978.16	TMEM87A	1	12	33.6059	28.316	32.0974	32.2569	19.7517	19.0737	18.6202	19.0762	29.1349	24.1037	21.7222	12.4594	-0.08	0.05	0.19	-0.02	-0.09	-0.12	-0.43	-0.35	-0.94	0.586745	0.733462	0.204881	0.876124	0.559537	0.43537	0.00515033	0.0213778	1.07668e-09	1	1	0.909319	1	1	1	1	0.586737	3.24619e-06
ENSG00000139921.13	TMX1	1	12	21.0038	18.4667	17.9389	15.8412	26.223	27.3288	24.3026	28.3609	33.0004	28.379	28.8076	15.7204	-0.04	-0.11	-0.15	0.08	-0.11	0.05	-0.38	-0.14	-0.83	0.868795	0.666759	0.548705	0.745631	0.667372	0.846433	0.140814	0.579435	0.00127057	1	1	1	1	1	1	1	1	0.0467166
ENSG00000130726.12	TRIM28	1	12	152.958	129.965	134.702	129.688	165.984	160.416	149.502	173.395	159.473	189.461	194.362	197.131	-0.06	-0.06	0.01	-0.02	-0.16	0.01	0.06	0.37	0.59	0.687594	0.67228	0.935003	0.878345	0.299548	0.957259	0.709117	0.0150508	9.30062e-05	1	1	1	1	1	1	1	0.505026	0.0103494
ENSG00000132256.19	TRIM5	1	12	5.60701	6.02944	9.4021	10.1426	14.2357	16.6702	16.1742	19.7731	10.47	12.4543	12.6848	10.9815	0.29	0.87	1.1	0.26	0.16	0.43	0.08	0.34	0.31	0.353683	0.00470061	0.000331317	0.404387	0.595922	0.159269	0.788854	0.272277	0.315885	1	0.672543	0.0406442	1	1	1	1	1	0.764852
ENSG00000122435.10	TRMT13	1	12	15.3857	12.4109	13.418	14.5146	13.1208	12.1052	11.8473	12.4373	10.1781	8.23299	6.68547	3.67992	-0.17	-0.09	0.16	-0.1	-0.16	-0.17	-0.46	-0.56	-1.19	0.625483	0.80873	0.64337	0.772721	0.649851	0.637783	0.19849	0.120019	0.00090102	1	1	1	1	1	1	1	1	0.0372134
ENSG00000182612.10	TSPAN10	1	12	1.90703	1.76387	2.53234	2.45023	2.0017	3.52342	3.31714	6.84418	1.54975	1.99376	1.66188	1.52068	0.03	0.52	0.6	0.81	0.69	1.68	0.21	0.22	0.24	0.931322	0.131906	0.0847339	0.0189609	0.044417	1.95952e-06	0.557118	0.535053	0.49373	1	1	0.736857	1	1	0.00183364	1	1	0.879971
ENSG00000136925.15	TSTD2	1	12	7.65854	5.64204	6.36371	6.3187	5.91711	6.29164	5.87509	6.30699	8.5842	7.91754	5.45101	3.9871	-0.29	-0.15	-0.04	0.11	-0.02	0.03	-0.28	-0.6	-0.85	0.276459	0.560442	0.893789	0.671947	0.942343	0.897779	0.290949	0.0227514	0.00134028	1	1	1	1	1	1	1	0.606301	0.0486313
ENSG00000198677.12	TTC37	1	12	46.9972	40.5215	40.5842	37.1329	32.9125	30.6498	29.6317	30.7165	32.091	33.1371	24.0034	16.8312	-0.04	-0.09	-0.09	-0.08	-0.15	-0.17	-0.11	-0.35	-0.66	0.720563	0.427778	0.438392	0.511158	0.18969	0.158288	0.333174	0.00305385	2.11262e-08	1	1	1	1	1	1	1	0.247902	3.53864e-05
ENSG00000155158.20	TTC39B	1	12	4.90827	4.12769	3.37396	2.77635	1.51284	1.25589	1.2589	1.18472	4.23249	4.22305	2.76034	2.00005	-0.07	-0.42	-0.58	-0.23	-0.26	-0.49	-0.14	-0.55	-0.8	0.76102	0.0820103	0.018173	0.346018	0.286234	0.0600928	0.554182	0.0238883	0.00101296	1	1	0.391643	1	1	1	1	0.623657	0.0399748
ENSG00000124120.11	TTPAL	1	12	7.52262	6.78971	10.7574	12.2644	6.45494	7.76234	7.67827	10.0948	6.30869	6.66276	6.95597	5.38683	0	0.63	0.96	0.29	0.24	0.58	-0.1	0.23	0.06	0.985662	0.0132818	0.000161336	0.253352	0.338428	0.02213	0.703067	0.364968	0.824384	1	1	0.0257795	1	1	0.874604	1	1	0.970548
ENSG00000136295.15	TTYH3	1	12	7.57213	7.14942	10.505	11.0752	10.7092	13.4476	14.2867	15.778	1.91151	2.87816	4.33343	6.06394	0.1	0.59	0.8	0.35	0.39	0.5	0.4	1.29	1.86	0.809813	0.146797	0.0501398	0.387531	0.334813	0.222582	0.325094	0.00170413	6.10825e-06	1	1	0.614257	1	1	1	1	0.187501	0.00184164
ENSG00000188229.6	TUBB4B	1	12	102.472	81.1919	85.4546	76.7941	93.9832	120.531	107.286	149.355	52.201	65.4835	81.3942	79.1525	-0.17	-0.14	-0.17	0.38	0.17	0.62	0.12	0.72	0.91	0.544209	0.599383	0.53489	0.169093	0.533512	0.0254987	0.672456	0.00859002	0.000919711	1	1	1	1	1	0.915513	1	0.400476	0.0377783
ENSG00000074935.14	TUBE1	1	12	20.3708	17.0051	14.3188	8.94536	9.35018	7.38079	7.31377	5.75472	23.0955	17.7344	10.9014	4.89019	-0.15	-0.4	-0.95	-0.32	-0.36	-0.75	-0.54	-1.01	-1.89	0.782875	0.449715	0.0732542	0.542762	0.491297	0.162759	0.304835	0.0569356	0.00035428	1	1	0.704988	1	1	1	1	0.822507	0.0228591
ENSG00000107815.10	TWNK	1	12	11.8272	10.6775	12.5741	15.0363	6.81817	6.36187	6.15802	6.74567	6.86637	8.77243	7.70087	7.71252	0.02	0.21	0.6	-0.08	-0.15	-0.09	0.18	0.24	0.44	0.902102	0.194902	0.000161376	0.633217	0.342118	0.595732	0.261581	0.133969	0.00568739	1	1	0.0257795	1	1	1	1	1	0.105458
ENSG00000115514.12	TXNDC9	1	12	14.5907	12.0721	13.789	13.5046	28.7596	33.2118	29.6181	36.6957	36.4541	31.6788	33.8621	17.8118	-0.1	0.04	0.14	0.23	0.04	0.29	-0.35	-0.02	-0.79	0.641138	0.85366	0.497887	0.264997	0.858974	0.165176	0.0848553	0.930212	0.000100848	1	1	1	1	1	1	1	1	0.0108592
ENSG00000176912.5	TYMSOS	1	12	1.29807	2.07874	2.26713	3.48109	2.60931	3.55119	3.37199	4.74678	4.34256	4.56534	6.37313	4.25187	0.87	0.92	1.68	0.46	0.37	0.83	-0.09	0.66	0.18	0.0591022	0.0445453	0.000247587	0.309598	0.411067	0.0745638	0.842969	0.143062	0.692169	1	1	0.0337418	1	1	1	1	1	0.943952
ENSG00000161265.15	U2AF1L4	1	12	8.13246	5.41906	4.39907	4.37706	2.64139	2.64654	2.65807	2.54619	13.3521	13.3417	10.2122	7.77931	-0.41	-0.77	-0.65	0.03	0.02	0.01	-0.17	-0.31	-0.52	0.0299646	6.12753e-05	0.000733327	0.869552	0.912278	0.956308	0.373604	0.0920473	0.00532115	1	0.0407047	0.0677751	1	1	1	1	0.932686	0.102317
ENSG00000163714.18	U2SURP	1	12	70.6684	60.5364	49.7087	46.1398	45.0263	42.9466	39.8687	43.2642	71.3519	70.4817	62.3894	37.3524	-0.05	-0.39	-0.37	-0.05	-0.18	-0.12	-0.17	-0.13	-0.67	0.794293	0.0344314	0.0462813	0.780748	0.321322	0.500658	0.357172	0.47186	0.000266036	1	1	0.592167	1	1	1	1	1	0.0187521
ENSG00000198833.7	UBE2J1	1	12	10.2884	8.10999	8.14877	7.20411	24.8571	21.1422	17.8292	17.3524	13.0689	11.3091	9.88278	5.39261	-0.18	-0.22	-0.27	-0.2	-0.47	-0.57	-0.36	-0.34	-1.01	0.448613	0.34757	0.255659	0.400437	0.0465337	0.0158124	0.128287	0.150483	1.84927e-05	1	1	0.962325	1	1	0.783033	1	1	0.00369371
ENSG00000173960.14	UBXN2A	1	12	10.3683	8.149	8.86809	8.18013	4.52686	5.10869	4.81372	5.76377	11.6831	10.0459	9.99644	5.54495	-0.18	-0.11	-0.1	0.2	0.08	0.3	-0.37	-0.15	-0.78	0.340743	0.559437	0.61489	0.295947	0.665886	0.126951	0.0521761	0.428127	4.28157e-05	1	1	1	1	1	1	1	1	0.00614711
ENSG00000014123.10	UFL1	1	12	7.95087	7.11216	6.78365	5.66514	9.5362	9.4549	7.82482	8.43045	13.5909	11.7328	8.98895	4.37654	0.03	-0.11	-0.24	0.02	-0.28	-0.22	-0.37	-0.53	-1.37	0.925082	0.700502	0.378836	0.955152	0.316165	0.424108	0.180595	0.054166	8.14098e-07	1	1	1	1	1	1	1	0.80961	0.000438305
ENSG00000065060.17	UHRF1BP1	1	12	4.55958	3.544	3.532	2.35222	2.56204	1.92281	1.95605	1.82126	18.2161	15.1525	10.2278	6.06331	-0.24	-0.26	-0.72	-0.38	-0.41	-0.54	-0.42	-0.76	-1.31	0.521878	0.484055	0.0530325	0.299821	0.267831	0.148707	0.256621	0.0403825	0.000407027	1	1	0.627325	1	1	1	1	0.744203	0.0246423
ENSG00000256073.3	URB1-AS1	1	12	4.14694	3.59177	4.67697	6.23538	4.38298	5.49998	4.5073	6.63122	9.09638	8.27631	8.62479	6.14296	-0.03	0.3	0.84	0.35	0.05	0.54	-0.29	0.01	-0.3	0.888845	0.172143	8.83388e-05	0.104745	0.831419	0.0183381	0.165231	0.978385	0.159932	1	1	0.0172674	1	1	0.819283	1	1	0.585757
ENSG00000105176.18	URI1	1	12	63.9526	52.1553	48.0032	44.5616	35.793	32.2062	31.7536	30.1886	44.2577	42.4092	39.3584	25.6827	-0.11	-0.29	-0.27	-0.13	-0.18	-0.3	-0.23	-0.11	-0.52	0.478801	0.057967	0.0785238	0.413262	0.248925	0.0590163	0.143145	0.488189	0.00084206	1	1	0.718843	1	1	1	1	1	0.0355576
ENSG00000162607.13	USP1	1	12	24.4536	17.4708	13.2869	10.1427	13.8221	12.8476	11.0701	11.7886	42.1041	37.6021	29.1854	15.5081	-0.32	-0.76	-1.03	-0.09	-0.33	-0.3	-0.32	-0.5	-1.17	0.321135	0.0164635	0.00119048	0.767908	0.297034	0.350432	0.319931	0.119697	0.000229514	1	1	0.0934244	1	1	1	1	1	0.0169604
ENSG00000156256.15	USP16	1	12	17.992	14.2173	14.2396	14.9609	21.2729	21.0017	19.5306	22.5586	23.8262	22.1376	18.8695	11.1255	-0.16	-0.22	-0.02	0.01	-0.13	0.03	-0.27	-0.27	-0.82	0.265876	0.129113	0.907558	0.927616	0.37335	0.816279	0.0636322	0.0597884	1.02273e-08	1	1	1	1	1	1	1	0.8368	1.92721e-05
ENSG00000155313.15	USP25	1	12	8.88247	7.36392	8.00376	6.84749	11.6583	10.4429	10.4965	9.73376	17.708	17.0629	10.8046	6.98074	-0.11	-0.03	-0.13	-0.13	-0.16	-0.32	-0.23	-0.67	-1.04	0.692986	0.902654	0.641582	0.650268	0.568747	0.265692	0.410595	0.0179139	0.000236595	1	1	1	1	1	1	1	0.544105	0.0170654
ENSG00000160293.17	VAV2	1	12	4.48017	3.92952	3.82508	3.70766	2.61661	2.96674	2.79648	2.92187	2.89707	3.38688	3.98901	4.38508	-0.03	-0.11	-0.02	0.2	0.09	0.11	0.05	0.56	0.86	0.889018	0.632365	0.929719	0.398082	0.712332	0.661919	0.837285	0.0194137	0.000301448	1	1	1	1	1	1	1	0.565168	0.0204668
ENSG00000111237.19	VPS29	1	12	43.8061	34.7503	40.6105	31.2537	30.4336	32.5241	29.5192	34.9388	64.9278	58.5304	51.2131	30.5109	-0.15	0.01	-0.24	0.11	-0.05	0.13	-0.3	-0.27	-0.81	0.452404	0.965175	0.237258	0.586338	0.798993	0.542869	0.147364	0.181702	7.96657e-05	1	1	0.944607	1	1	1	1	1	0.00953143
ENSG00000138442.10	WDR12	1	12	45.6643	40.3597	40.1787	36.8858	44.7512	34.2664	33.6975	34.3259	76.2205	71.5769	61.5908	39.6238	0.01	-0.06	-0.06	-0.36	-0.41	-0.44	-0.25	-0.25	-0.69	0.961687	0.745175	0.76541	0.0639715	0.034892	0.0277647	0.195567	0.20715	0.000448897	1	1	1	1	1	0.938209	1	1	0.025633
ENSG00000047056.16	WDR37	1	12	3.49429	2.79215	3.81935	3.87543	5.14566	5.36888	5.09879	4.82634	2.24754	2.94799	2.8867	2.80068	-0.16	0.24	0.4	0.08	-0.03	-0.13	0.23	0.45	0.62	0.288963	0.0929637	0.00614584	0.556443	0.848868	0.367914	0.125726	0.00207982	2.66481e-05	1	1	0.232097	1	1	1	1	0.211042	0.00451371
ENSG00000164253.14	WDR41	1	12	28.494	22.7861	26.8013	22.6665	15.0072	15.0674	16.2842	17.5462	48.188	42.1531	32.2768	20.6919	-0.14	0.03	-0.09	0.02	0.1	0.16	-0.34	-0.52	-0.97	0.562912	0.903063	0.719297	0.925761	0.687148	0.51725	0.159626	0.0329287	7.92878e-05	1	1	1	1	1	1	1	0.686752	0.00953143
ENSG00000103091.15	WDR59	1	12	13.5593	12.182	13.6472	11.8507	12.5992	11.2912	10.6877	13.237	19.2873	24.5868	21.6477	23.2292	0.02	0.13	0.06	-0.12	-0.25	0	0.18	0.27	0.55	0.877804	0.37708	0.705661	0.40062	0.0905449	0.988225	0.219042	0.0679734	0.000174367	1	1	1	1	1	1	1	0.869454	0.0145752
ENSG00000092470.12	WDR76	1	12	12.013	9.14906	6.0725	3.3525	3.6174	2.57031	2.5115	1.86035	15.2443	13.5613	10.9644	6.47248	-0.23	-0.87	-1.6	-0.47	-0.51	-1.05	-0.37	-0.46	-0.93	0.57926	0.0341089	8.99155e-05	0.249985	0.211513	0.0126613	0.365167	0.257422	0.0223215	1	1	0.0173515	1	1	0.704151	1	1	0.223734
ENSG00000100219.16	XBP1	1	12	55.3193	46.4575	43.0537	33.4185	50.9384	45.4104	41.5795	39.9354	147.183	107.147	66.3916	37.5118	-0.09	-0.25	-0.49	-0.12	-0.3	-0.39	-0.59	-1.09	-1.75	0.800019	0.501567	0.183906	0.736914	0.414091	0.292294	0.105426	0.00284662	1.63222e-06	1	1	0.889062	1	1	1	1	0.244231	0.000723696
ENSG00000154767.15	XPC	1	12	12.4514	12.0949	22.5301	27.0789	20.298	27.8588	27.7272	35.3836	12.0273	14.7855	26.6865	20.0604	0.1	0.97	1.38	0.48	0.43	0.76	0.13	1.29	0.98	0.784723	0.00889416	0.000215111	0.193556	0.243232	0.0407693	0.733393	0.000546134	0.00823502	1	0.865093	0.0320303	1	1	1	1	0.105403	0.128247
ENSG00000184575.12	XPOT	1	12	138.366	100.23	90.6056	66.4381	84.5694	55.9634	54.1596	49.8977	137.237	117.04	88.0643	49.5825	-0.32	-0.5	-0.82	-0.56	-0.64	-0.81	-0.38	-0.57	-1.2	0.233725	0.0596389	0.00196833	0.034854	0.0151125	0.00225115	0.148687	0.0303098	5.92598e-06	1	1	0.126952	1	1	0.290902	1	0.678814	0.00182315
ENSG00000127337.7	YEATS4	1	12	20.4009	16.2546	11.9612	11.1927	11.8513	10.7898	10.0487	10.7167	23.1438	21.1898	18.7092	10.2434	-0.18	-0.66	-0.62	-0.12	-0.24	-0.2	-0.28	-0.25	-0.88	0.520806	0.0165609	0.0228797	0.654092	0.373439	0.468105	0.300444	0.363141	0.00134677	1	1	0.436526	1	1	1	1	1	0.0486313
ENSG00000119820.11	YIPF4	1	12	53.3963	40.3693	39.9196	40.6237	32.2004	28.8231	27.114	28.61	39.131	31.3407	30.1054	13.2576	-0.23	-0.3	-0.15	-0.14	-0.24	-0.23	-0.45	-0.28	-1.3	0.362027	0.230401	0.561221	0.588235	0.340445	0.374307	0.0769771	0.272656	2.78137e-07	1	1	1	1	1	1	1	1	0.000246642
ENSG00000204859.13	ZBTB48	1	12	5.03482	4.41935	7.46681	8.35097	5.22295	5.01133	4.61951	5.78928	7.41519	7.02208	7.27645	5.87025	-0.04	0.68	0.98	-0.04	-0.17	0.08	-0.27	0.07	-0.09	0.892214	0.0131309	0.000386102	0.880589	0.534993	0.766022	0.321689	0.802827	0.738054	1	1	0.0444199	1	1	1	1	1	0.956383
ENSG00000144161.13	ZC3H8	1	12	10.6302	8.53604	9.23177	8.89927	7.0479	7.06653	8.16179	7.65155	18.7818	17.842	12.7046	7.45643	-0.14	-0.09	-0.02	0.04	0.18	0.07	-0.23	-0.49	-1.07	0.595161	0.751935	0.954736	0.88482	0.506574	0.786251	0.391679	0.0701122	7.08701e-05	1	1	1	1	1	1	1	0.875617	0.00897788
ENSG00000033030.15	ZCCHC8	1	12	13.8827	11.5761	9.62451	8.21004	7.7339	7.07546	6.28534	6.58772	30.7925	27.2973	16.0987	11.3847	-0.09	-0.41	-0.52	-0.1	-0.31	-0.29	-0.31	-0.88	-1.21	0.774439	0.205093	0.10904	0.753546	0.346896	0.379894	0.335627	0.00644993	0.000187375	1	1	0.788209	1	1	1	1	0.355437	0.0151038
ENSG00000180776.16	ZDHHC20	1	12	29.9762	28.5193	28.5873	19.9806	22.8104	23.6077	22.3826	23.9778	31.366	26.1097	25.0754	14.467	0.08	0.05	-0.34	0.06	-0.03	0.02	-0.44	-0.28	-0.88	0.772114	0.867082	0.210339	0.810472	0.916519	0.953193	0.102385	0.300383	0.00113662	1	1	0.919332	1	1	1	1	1	0.0434887
ENSG00000104231.11	ZFAND1	1	12	70.9153	56.0384	54.591	52.5676	33.7649	28.6823	28.8389	25.0268	44.7847	39.8474	32.8696	19.7403	-0.16	-0.26	-0.19	-0.21	-0.23	-0.46	-0.32	-0.38	-0.9	0.403793	0.18722	0.34614	0.287144	0.242477	0.02186	0.10665	0.0579828	5.59932e-06	1	1	1	1	1	0.872481	1	0.825265	0.00179595
ENSG00000056097.16	ZFR	1	12	34.358	28.7105	29.6878	27.1234	22.8631	22.4366	21.2687	22.4713	40.737	38.3633	32.5369	22.1069	-0.07	-0.09	-0.09	0	-0.11	-0.08	-0.24	-0.26	-0.62	0.695227	0.632358	0.623386	0.993633	0.558853	0.675819	0.212198	0.173439	0.001113	1	1	1	1	1	1	1	1	0.0426934
ENSG00000100711.14	ZFYVE21	1	12	6.11065	5.3556	6.40675	5.47245	11.2556	11.8918	11.6938	13.5637	10.577	12.1544	16.9598	14.7387	-0.02	0.19	0.09	0.1	0.05	0.22	0.02	0.8	0.75	0.935198	0.405552	0.693469	0.662072	0.824501	0.342624	0.944875	0.00030879	0.000671768	1	1	1	1	1	1	1	0.0780904	0.0308747
ENSG00000138658.16	ZGRF1	1	12	10.2401	7.83657	5.78166	3.87032	4.5367	4.81832	4.62661	4.59455	9.2652	9.12826	5.95456	4.14779	-0.22	-0.71	-1.16	0.1	0	-0.05	-0.19	-0.61	-0.93	0.478233	0.0235509	0.000206223	0.760348	0.993953	0.871112	0.537806	0.0494333	0.00284363	1	1	0.0310907	1	1	1	1	0.779776	0.0724244
ENSG00000167635.12	ZNF146	1	12	49.7635	38.1368	40.3729	38.982	32.4391	29.347	26.9424	27.3904	83.9942	75.8466	62.8136	39.1631	-0.2	-0.18	-0.11	-0.13	-0.27	-0.29	-0.3	-0.36	-0.84	0.397573	0.440384	0.649799	0.596106	0.246493	0.215355	0.205189	0.125342	0.000374578	1	1	1	1	1	1	1	1	0.0233337
ENSG00000165804.16	ZNF219	1	12	2.1538	2.16465	4.15961	5.98742	4.51354	5.50597	6.00358	8.77347	6.85537	8.33195	14.28	11.6365	0.2	1.07	1.73	0.3	0.37	0.9	0.1	1.2	1.06	0.623239	0.00734989	1.62982e-05	0.455209	0.34717	0.025556	0.793755	0.00244848	0.00772316	1	0.779117	0.00535815	1	1	0.915513	1	0.225149	0.124255
ENSG00000172466.16	ZNF24	1	12	22.0699	19.9722	19.5905	17.3655	19.2491	19.1667	17.1113	19.3264	27.714	25.1084	24.6686	15.6797	0.03	-0.05	-0.1	0.02	-0.17	-0.05	-0.3	-0.1	-0.58	0.840214	0.756505	0.566758	0.896864	0.322017	0.764005	0.080669	0.561717	0.000764471	1	1	1	1	1	1	1	1	0.0333075
ENSG00000175395.16	ZNF25	1	12	1.33833	1.30066	1.29959	1.18016	2.65358	2.52119	2.38358	2.29906	6.87773	6.07404	4.22577	2.30873	0.12	0.08	0.06	-0.04	-0.15	-0.27	-0.33	-0.65	-1.27	0.733842	0.828975	0.872008	0.902557	0.675087	0.455675	0.340156	0.063524	0.000281757	1	1	1	1	1	1	1	0.851673	0.0196643
ENSG00000063587.15	ZNF275	1	12	2.89288	2.44884	3.08386	2.69063	2.34274	2.33658	2.56251	2.54491	2.00072	2.38017	2.66804	2.56065	-0.08	0.21	0.14	0.03	0.12	0.06	0.07	0.51	0.63	0.649694	0.24837	0.429199	0.889154	0.508307	0.765065	0.681353	0.0047186	0.0005401	1	1	1	1	1	1	1	0.301785	0.0282708
ENSG00000165244.7	ZNF367	1	12	8.28749	6.332	4.94981	2.62535	4.12728	2.94896	2.51376	2.07161	9.13841	8.6452	6.42009	3.52921	-0.21	-0.62	-1.42	-0.46	-0.71	-1.08	-0.24	-0.49	-1.13	0.572654	0.101302	0.00019229	0.227933	0.0613474	0.00599396	0.524224	0.20117	0.00299922	1	1	0.0297334	1	1	0.486935	1	1	0.0746093
ENSG00000198464.14	ZNF480	1	12	3.8617	3.16913	4.70007	5.41176	3.14412	3.76178	3.35151	5.17896	7.03755	8.15857	7.08434	6.99218	-0.12	0.4	0.73	0.29	0.08	0.65	0.04	0.08	0.27	0.528991	0.0393021	0.00015784	0.139887	0.684692	0.00115662	0.816795	0.6764	0.158878	1	1	0.025627	1	1	0.201778	1	1	0.584008
ENSG00000177853.14	ZNF518A	1	12	9.36596	8.60617	10.3037	7.75146	10.1944	10.1379	10.7302	8.7293	15.0587	14.0375	11.1091	6.74851	0.04	0.26	-0.03	0.02	0.06	-0.26	-0.24	-0.4	-0.92	0.897335	0.361625	0.924396	0.93413	0.843972	0.365599	0.383189	0.158462	0.00103214	1	1	1	1	1	1	1	1	0.0405196
ENSG00000075292.19	ZNF638	1	12	49.5327	42.2572	47.0047	38.8594	28.6226	28.6976	30.4422	28.4222	50.6896	48.3957	45.406	31.4728	-0.05	0.04	-0.1	0.02	0.07	-0.08	-0.23	-0.09	-0.43	0.696447	0.730462	0.430803	0.845766	0.569643	0.521325	0.0705225	0.491501	0.000708122	1	1	1	1	1	1	1	1	0.0319609
ENSG00000166016.6	ABTB2	1	11	3.42665	3.18962	2.86259	2.99575	3.19944	3.20946	3.35321	3.74785	0.9304	1.29232	1.57579	1.67644	0.09	-0.14	0.06	0.04	0.06	0.18	0.31	0.86	1.08	0.771324	0.6507	0.839625	0.890049	0.842514	0.555405	0.324504	0.0061492	0.000525419	1	1	1	1	1	1	1	0.346093	0.0279629
ENSG00000260552.1	AC023043.1	1	11	16.1371	26.8367	34.2304	45.4728	4.65921	6.60782	6.26674	7.99132	1.63259	1.82639	1.64066	0.880482	0.9	1.2	1.76	0.52	0.42	0.74	0	0.09	-0.54	0.0676967	0.014614	0.000357529	0.295558	0.398462	0.142014	0.992424	0.858587	0.303256	1	1	0.0423367	1	1	1	1	1	0.751244
ENSG00000106948.17	AKNA	1	11	4.4551	2.38273	1.32533	0.979699	1.53751	1.51513	1.50334	1.35899	9.58823	6.18456	2.84607	1.55408	-0.77	-1.64	-1.95	0.03	-0.04	-0.17	-0.73	-1.62	-2.41	0.257071	0.0150358	0.003805	0.970411	0.95832	0.802898	0.282461	0.0164016	0.000356344	1	1	0.182112	1	1	1	1	0.518223	0.0228591
ENSG00000163013.12	FBXO41	1	11	1.72583	1.67019	2.19123	2.13572	1.50267	1.40599	1.59888	1.62768	0.789643	1.06624	1.21859	1.29966	0.14	0.47	0.56	-0.07	0.06	0.06	0.3	0.74	0.99	0.570041	0.0518278	0.0195923	0.759543	0.801338	0.811695	0.221318	0.00250387	4.16421e-05	1	1	0.406018	1	1	1	1	0.226677	0.00609471
ENSG00000099308.10	MAST3	1	11	2.08147	2.08607	2.8501	3.30305	0.820662	1.07163	1.07639	1.2319	1.96365	2.58957	3.16379	4.1482	0.18	0.57	0.92	0.41	0.36	0.56	0.21	0.77	1.28	0.577548	0.0810317	0.00509513	0.212212	0.270341	0.0989798	0.519785	0.0195445	9.30581e-05	1	1	0.211176	1	1	1	1	0.566478	0.0103494
ENSG00000172197.11	MBOAT1	1	11	3.46882	2.74959	1.67131	1.27543	1.22009	1.08854	1.01503	0.907659	3.65392	3.49894	2.09029	1.50895	-0.18	-0.94	-1.2	-0.15	-0.28	-0.52	-0.23	-0.78	-0.98	0.595989	0.00535418	0.000371884	0.667872	0.409207	0.146599	0.49872	0.0196193	0.00352046	1	0.695868	0.0433361	1	1	1	1	0.566776	0.0823239
ENSG00000001617.12	SEMA3F	1	11	4.12274	3.21283	3.16459	3.02231	10.0711	11.4672	10.8772	13.7063	0.964194	1.57208	2.66155	4.30999	-0.1	-0.25	-0.2	0.22	0.12	0.39	0.54	1.61	2.4	0.888495	0.738244	0.786136	0.770495	0.870589	0.59955	0.472939	0.0310556	0.00134821	1	1	1	1	1	1	1	0.679387	0.0486313
ENSG00000107614.22	TRDMT1	1	11	2.86867	2.18106	1.71121	1.692	3.38403	2.95708	2.88482	3.22926	2.08367	2.14465	1.03588	0.649775	-0.24	-0.63	-0.51	-0.18	-0.24	-0.18	-0.07	-0.97	-1.36	0.568881	0.137733	0.22597	0.668271	0.575006	0.668046	0.867092	0.022623	0.00138755	1	1	0.934965	1	1	1	1	0.604198	0.0493333
ENSG00000154127.10	UBASH3B	1	11	17.4672	13.7157	10.9998	9.28897	14.5152	13.2197	13.4289	13.537	0.790413	1.38144	2.04991	2.76592	-0.17	-0.55	-0.67	-0.1	-0.12	-0.15	0.63	1.51	2.18	0.685528	0.195493	0.115119	0.807713	0.775208	0.721395	0.142394	0.000414494	3.72546e-07	1	1	0.79911	1	1	1	1	0.0933474	0.00027142
ENSG00000261221.4	ZNF865	1	11	1.13214	1.09654	1.48518	1.65885	1.64608	1.40816	1.7732	1.50326	0.804165	1.15554	1.50113	1.68355	0.1	0.5	0.8	-0.2	0.09	-0.16	0.34	1.03	1.34	0.751007	0.111473	0.0109651	0.521536	0.781987	0.627009	0.291667	0.00124822	2.43933e-05	1	1	0.310812	1	1	1	1	0.16064	0.00431512
ENSG00000147251.15	DOCK11	1	10	2.33419	1.71483	1.11595	0.729116	1.36206	1.23678	1.16583	0.906952	1.59562	1.73264	1.35988	1.10048	-0.29	-0.95	-1.44	-0.11	-0.22	-0.63	-0.03	-0.15	-0.3	0.331302	0.00149779	1.64879e-06	0.723149	0.454035	0.0422847	0.91483	0.617915	0.3097	1	0.369504	0.000994304	1	1	1	1	1	0.757418
ENSG00000137166.16	FOXP4	1	10	1.24047	1.1514	0.937259	0.935221	1.65324	1.61969	2.04221	1.57375	1.57093	2.13144	2.58544	2.85469	0.07	-0.29	-0.16	-0.01	0.28	-0.09	0.25	0.82	1.13	0.769445	0.226655	0.503507	0.950807	0.231492	0.714219	0.297173	0.00047484	1.31982e-06	1	1	1	1	1	1	1	0.0995637	0.000641817
ENSG00000168918.14	INPP5D	1	10	0.445597	0.803596	2.15005	2.04685	3.47506	5.67755	5.79883	5.82734	1.13996	2.55871	6.29327	8.51004	1.01	2.4	2.45	0.75	0.72	0.71	1.02	2.58	3	0.246767	0.005892	0.00486358	0.38953	0.40887	0.414348	0.239352	0.00292772	0.000561883	1	0.714663	0.207645	1	1	1	1	0.245829	0.0286873
ENSG00000275074.2	NUDT18	1	10	0.84682	0.894551	1.31394	1.6419	1.83642	2.40052	2.22382	2.90032	3.80736	4.28363	4.00063	3.42342	0.27	0.76	1.21	0.42	0.28	0.61	0	0.16	0.08	0.347791	0.00801469	2.03615e-05	0.127674	0.311948	0.0356892	0.986707	0.561862	0.769403	1	0.820734	0.00598975	1	1	1	1	1	0.960554
ENSG00000228288.7	PCAT6	1	10	1.11245	2.0003	3.08624	4.53884	0.9586	1.06573	1.23842	1.12226	0.941932	1.28552	1.01364	1.44516	1.05	1.6	2.29	0.18	0.37	0.31	0.29	0.23	0.86	0.0372199	0.00132861	3.87274e-06	0.72312	0.468995	0.579767	0.56549	0.659888	0.0893308	1	0.344736	0.00186837	1	1	1	1	1	NA
ENSG00000147852.16	VLDLR	1	10	1.22649	0.903322	1.04547	0.742792	4.46643	4.47786	4.8789	4.47603	7.48189	6.54642	5.45746	3.56464	-0.28	-0.11	-0.48	0.03	0.13	-0.08	-0.36	-0.34	-0.8	0.245143	0.639569	0.0443532	0.897766	0.589328	0.736941	0.122575	0.138469	0.000581165	1	1	0.583604	1	1	1	1	1	0.0286873
ENSG00000215559.8	ANKRD20A11P	1	9	0.628552	0.854656	1.94874	3.09198	4.4967	5.83143	6.18605	7.38061	0.75735	1.54211	2.73353	2.0109	0.62	1.77	2.57	0.39	0.43	0.67	0.93	2.03	1.64	0.311286	0.0040711	2.92158e-05	0.518303	0.482954	0.274684	0.130908	0.00097119	0.00771824	1	0.618566	0.00791846	1	1	1	1	0.140699	0.124255
ENSG00000171365.17	CLCN5	1	9	3.41992	3.74956	2.93922	2.75573	1.17716	0.885552	0.869841	0.581149	3.8766	4.74795	4.63259	2.94789	0.29	-0.1	-0.06	-0.38	-0.44	-1.05	0.09	0.33	-0.12	0.191982	0.646738	0.784623	0.0952685	0.0557352	1.82726e-05	0.704363	0.140692	0.578716	1	1	1	1	1	0.0112696	1	1	0.914227
ENSG00000137094.15	DNAJB5	1	9	0.857611	0.988568	1.16473	0.933541	1.20765	1.54434	1.33574	1.56535	1.78555	2.47504	2.63131	2.90504	0.39	0.56	0.37	0.38	0.13	0.36	0.26	0.64	1	0.165756	0.0464391	0.18747	0.173511	0.639907	0.221198	0.341373	0.019888	0.00030124	1	1	0.893881	1	1	1	1	0.568776	0.0204668
ENSG00000088340.17	FER1L4	1	9	2.21268	2.31923	5.89173	6.16352	0.355191	0.712108	0.733799	1.12291	6.25962	8.79393	7.41379	12.4943	0.21	1.53	1.74	1.02	1.03	1.54	0.3	0.32	1.17	0.658622	0.00133748	0.000263723	0.0373442	0.0347627	0.00235317	0.528353	0.501488	0.0137888	1	0.344736	0.0352527	1	1	0.298401	1	1	0.173145
ENSG00000265817.4	FSBP	1	9	4.6153	3.95664	3.2062	2.9664	0.810988	0.991241	0.959414	1.03527	6.0834	5.04282	3.47834	2.00471	-0.06	-0.41	-0.39	0.31	0.22	0.29	-0.44	-0.78	-1.29	0.874931	0.269178	0.297591	0.413309	0.557845	0.462717	0.230072	0.034812	0.000465109	1	1	0.98471	1	1	1	1	0.698724	0.0258719
ENSG00000214900.11	LINC01588	1	9	2.3008	2.49811	4.46738	7.01953	1.92749	2.92927	2.70091	4.21612	0.975396	1.3558	0.849025	0.977828	0.33	1.09	1.86	0.61	0.45	1.05	0.27	-0.1	0.3	0.476203	0.0204199	7.23529e-05	0.195282	0.333582	0.0266894	0.561677	0.833053	0.527998	1	1	0.0157234	1	1	0.931131	1	1	0.893731
ENSG00000235448.3	LURAP1L-AS1	1	9	6.38417	2.62284	1.38983	0.661068	11.9723	7.65367	8.02361	6.36558	2.24502	1.80229	0.947837	0.367003	-1.2	-2.1	-3.05	-0.6	-0.59	-0.96	-0.42	-1.11	-2.32	0.128315	0.00796703	0.000120009	0.444121	0.455637	0.225159	0.595208	0.163312	0.00363675	1	0.818944	0.0212856	1	1	1	1	1	0.0833191
ENSG00000088836.14	SLC4A11	1	9	0.972721	0.911042	1.23726	1.44675	0.987039	1.25659	1.20845	1.62087	4.3198	6.22634	8.11738	10.799	0.07	0.47	0.82	0.37	0.24	0.74	0.32	0.99	1.56	0.854661	0.231079	0.0360337	0.339789	0.531456	0.06611	0.402887	0.00938676	4.38285e-05	1	1	0.538747	1	1	1	1	0.416139	0.00623316
ENSG00000188372.15	ZP3	1	9	6.22329	5.13657	6.6137	6.69817	0.274094	0.550382	0.273641	1.3735	7.78102	7.41979	6.79375	5.16928	-0.1	0.21	0.35	1.01	-0.03	2.03	-0.24	-0.08	-0.27	0.801722	0.612473	0.394068	0.0233717	0.944893	3.06707e-05	0.557868	0.851517	0.505855	1	1	1	1	1	0.0167422	1	1	0.885996
ENSG00000099204.20	ABLIM1	1	8	3.95034	3.40706	5.68086	5.35228	0.181538	0.0719335	0.047607	0.0469555	22.64	25.7688	21.4909	18.0791	-0.06	0.64	0.69	-1.29	-1.88	-2.28	-0.01	-0.02	-0.02	0.895706	0.13154	0.10705	0.0047071	4.1718e-05	3.23953e-05	0.989877	0.969972	0.955909	1	1	0.786612	1	0.0912644	0.0172374	1	1	0.994735
ENSG00000258077.2	AC078923.1	1	8	1.1251	1.05549	1.90482	2.74442	3.1735	4.84476	4.48643	5.58364	0.014516	0.0112775	0	0.011643	0.1	0.9	1.57	0.64	0.49	0.77	-0.3	-2.38	0.03	0.732306	0.00195519	4.30683e-08	0.0151649	0.0616219	0.00597874	0.8368	0.182631	0.984453	1	0.420398	5.77163e-05	1	1	0.486935	1	1	0.998697
ENSG00000253878.5	AC087752.3	1	8	0.523369	0.524305	1.10081	1.78638	2.61251	3.31577	3.02991	3.77192	0.589533	0.685469	1.3845	1.3376	0.17	1.2	2.03	0.37	0.19	0.5	0.05	1.36	1.39	0.752262	0.0257682	0.000142502	0.464148	0.706544	0.336982	0.925072	0.0107932	0.00898144	1	1	0.024553	1	1	1	1	0.437618	0.134454
ENSG00000135439.11	AGAP2	1	8	0.952506	0.993783	1.1984	0.995701	1.57811	2.04889	1.5874	2.00763	0.784614	1.13336	1.11788	1.49762	0.2	0.44	0.3	0.41	0	0.3	0.35	0.64	1.23	0.590859	0.228014	0.410006	0.261989	0.99299	0.412184	0.332069	0.0788833	0.000735643	1	1	1	1	1	1	1	0.89376	0.0328101
ENSG00000274070.2	CASTOR2	1	8	1.69111	1.46301	1.87285	1.96605	0.496596	0.618294	0.667849	0.687597	2.43955	3.52718	5.38311	5.69782	-0.07	0.26	0.47	0.34	0.4	0.44	0.33	1.24	1.43	0.865393	0.549777	0.280844	0.433554	0.357366	0.325793	0.446019	0.00424555	0.000965934	1	1	0.976119	1	1	1	1	0.283565	0.0389344
ENSG00000268902.3	CSAG2	1	8	1.69538	1.43731	2.07329	1.58977	6.62944	6.80071	7.36672	7.5996	0	0.0629675	0	0.0941385	-0.03	0.41	0.15	0.05	0.15	0.14	4.93	0	6.19	0.978328	0.6688	0.875507	0.954605	0.879713	0.885025	0.00573968	1	0.000442271	1	1	1	1	1	1	1	1	0.0254475
ENSG00000139318.8	DUSP6	1	8	79.8192	64.7359	53.3542	46.349	0.102628	0.127076	0.0658415	0.167012	13.4534	17.4819	27.1171	34.9789	-0.14	-0.47	-0.54	0.31	-0.64	-0.31	0.22	1.1	1.62	0.775876	0.338698	0.270491	0.562	0.23923	0.645963	0.648893	0.0245489	0.000985175	1	1	0.971581	1	1	1	1	0.627752	0.0392897
ENSG00000155849.15	ELMO1	1	8	12.2473	12.0736	10.1363	8.00441	2.33576	2.65576	3.46457	3.66562	0.330738	0.405848	0.361674	0.856666	0.15	-0.15	-0.36	0.23	0.55	0.59	0.11	0.16	1.72	0.748944	0.75017	0.458848	0.63054	0.253644	0.232523	0.825412	0.754024	0.000571373	1	1	1	1	1	1	1	1	0.0286873
ENSG00000068078.20	FGFR3	1	8	2.21965	1.70446	2.0714	1.42171	0.339342	0.505127	0.434114	0.639865	3.90808	5.10706	6.88259	7.80187	-0.19	0.02	-0.39	0.61	0.34	0.93	0.19	0.93	1.26	0.621364	0.948817	0.300656	0.116468	0.380121	0.0217577	0.607619	0.0135521	0.000789005	1	1	0.984856	1	1	0.872481	1	0.483161	0.0338868
ENSG00000283023.1	FRG1GP	1	8	3.43685	2.66718	2.47071	2.37712	2.70755	2.61544	2.07427	2.01287	0.518925	0.474612	0.454647	0.158047	-0.2	-0.36	-0.29	-0.03	-0.39	-0.44	-0.31	-0.11	-1.48	0.412758	0.140624	0.242897	0.887935	0.113755	0.120652	0.348201	0.746591	0.000139679	1	1	0.950873	1	1	1	1	1	0.0129182
ENSG00000215548.2	FRG1JP	1	8	6.04217	5.05101	4.73346	4.7694	4.5312	3.84921	3.75796	3.04562	0.883819	0.83802	0.63133	0.374397	-0.09	-0.23	-0.09	-0.22	-0.27	-0.58	-0.25	-0.42	-0.98	0.703408	0.337048	0.706117	0.36911	0.278083	0.0301103	0.370177	0.149647	0.00109463	1	1	1	1	1	0.962601	1	1	0.0423116
ENSG00000178445.10	GLDC	1	8	2.98004	3.32613	2.98181	2.97145	0.900831	0.789677	0.834733	0.886229	12.8644	18.4214	29.708	41.017	0.26	0.11	0.26	-0.18	-0.14	-0.17	0.33	1.34	1.95	0.645847	0.846931	0.655269	0.759279	0.8107	0.779209	0.560317	0.0179168	0.000584212	1	1	1	1	1	1	1	0.544105	0.0286873
ENSG00000277075.2	H2AC8	1	8	313.765	224.356	99.1315	66.9338	52.6041	42.3132	35.544	27.8087	0.100209	0.0244515	0	0	-0.32	-1.55	-1.98	-0.31	-0.57	-0.99	-2.16	-4.41	-4.37	0.469188	0.000545684	1.02623e-05	0.492116	0.203022	0.0296529	0.07451	0.00536308	0.00587841	1	0.197508	0.00370766	1	1	0.957967	1	0.319755	0.107757
ENSG00000273802.2	H2BC8	1	8	91.1726	64.1511	32.3027	21.9887	12.0199	9.72296	9.27288	7.14291	0.0409965	0.0512855	0.0455335	0.040036	-0.33	-1.38	-1.8	-0.31	-0.38	-0.83	0.15	0.25	0.28	0.440723	0.00113365	2.24871e-05	0.465552	0.370533	0.0534997	0.823126	0.719516	0.679758	1	0.313916	0.00645755	1	1	1	1	1	0.93998
ENSG00000234571.2	H2BP2	1	8	35.1749	25.1258	7.15268	5.81522	6.57609	3.54415	3.20675	3.83859	0.0337415	0.0017675	0.0141695	0.016619	-0.26	-2.17	-2.35	-0.91	-1.06	-0.93	-3.92	-1.58	-0.57	0.700255	0.0010886	0.000406255	0.171332	0.113869	0.178064	0.00720603	0.145529	0.608954	1	0.313916	0.0453689	1	1	1	1	1	0.923458
ENSG00000277775.2	H3C7	1	8	215.338	170.236	85.0743	46.2173	0	0.0246135	0.0204195	0	350.144	264.516	64.7606	47.6029	-0.2	-1.23	-1.97	15.21	14.82	0	-0.53	-2.37	-2.9	0.948878	0.687442	0.518739	1.46175e-05	2.71612e-05	1	0.863533	0.438933	0.343196	1	1	1	0.0440772	0.0673417	1	1	1	0.790841
ENSG00000196565.15	HBG2	1	8	1.36016	1.50303	2.25688	3.12224	10.4764	10.0493	9.76737	9.76774	0.061177	0.0589305	0.0537075	0.0946535	0.34	0.86	1.46	-0.05	-0.11	-0.23	-0.32	-0.14	1.22	0.418902	0.0390392	0.000400425	0.901021	0.784369	0.570647	0.698979	0.866734	0.119611	1	1	0.0451358	1	1	1	1	1	0.511975
ENSG00000179630.11	LACC1	1	8	1.55936	1.31916	3.61701	5.11681	6.77759	10.03	8.86835	11.1046	0.0101875	0.0217105	0.0053925	0.0026245	-0.07	1.34	1.96	0.61	0.38	0.68	1.03	-0.84	-1.34	0.873201	0.00241945	8.63901e-06	0.164371	0.38491	0.121102	0.17465	0.39816	0.209757	1	0.475234	0.0032561	1	1	1	1	1	0.656852
ENSG00000227308.2	LINC02832	1	8	1.59279	2.12777	4.28925	6.43822	2.67672	2.71771	3.11811	2.48464	0.400508	0.410723	0.35173	0.320931	0.59	1.55	2.29	0.04	0.17	-0.06	-0.09	-0.09	-0.03	0.322338	0.0087362	0.000100753	0.946015	0.775252	0.91887	0.8812	0.888098	0.963276	1	0.862049	0.0186951	1	1	1	1	1	0.995162
ENSG00000267374.2	MIR924HG	1	8	7.30757	5.6646	3.99426	2.1369	3.59203	3.85088	4.21067	3.76335	0.0701445	0.082962	0.069164	0.055498	-0.21	-0.76	-1.53	0.1	0.19	-0.11	0.18	0.15	0.01	0.616341	0.0678804	0.000237656	0.817481	0.645789	0.79942	0.778748	0.817571	0.98991	1	1	0.0333299	1	1	1	1	1	0.999757
ENSG00000184363.10	PKP3	1	8	2.47469	1.85203	3.15678	2.59779	2.87004	2.62603	2.12245	2.93169	0.057921	0.084534	0.299256	0.119421	-0.25	0.46	0.32	-0.1	-0.45	0.01	0.25	2.5	1.24	0.640087	0.386692	0.546149	0.854905	0.405395	0.97941	0.689989	2.83091e-05	0.0385733	1	1	1	1	1	1	1	0.0215062	0.293535
ENSG00000104368.19	PLAT	1	8	37.2307	37.0194	40.6138	43.8959	68.6265	143.094	121.584	203.029	0.681909	0.969251	0.704627	0.792063	0.18	0.24	0.48	1.06	0.81	1.49	0.33	0.14	0.46	0.539475	0.406948	0.0994212	0.000276473	0.00557117	3.06447e-07	0.2812	0.638116	0.12902	1	1	0.770395	0.39871	1	0.000398219	1	1	0.530256
ENSG00000185634.12	SHC4	1	8	2.24848	2.57753	3.86758	5.03452	1.02774	2.60491	2.74111	4.83801	0.507607	0.823239	0.478702	0.449023	0.36	0.9	1.41	1.34	1.36	2.18	0.5	-0.02	0.06	0.406	0.039101	0.00115857	0.00218102	0.00188094	6.83701e-07	0.274677	0.963576	0.893779	1	1	0.0928476	1	1	0.000742144	1	1	0.984666
ENSG00000107882.12	SUFU	1	8	1.39521	1.49632	1.99594	2.45536	2.27572	2.55438	2.38126	2.32313	0.781224	0.954205	0.97173	0.952882	0.28	0.64	1.08	0.19	0.06	-0.04	0.11	0.4	0.54	0.236156	0.00694242	4.80993e-06	0.409048	0.785211	0.882997	0.642969	0.100751	0.0242289	1	0.762739	0.00218916	1	1	1	1	0.965672	0.230111
ENSG00000134827.8	TCN1	1	8	1.3806	2.39756	12.1734	17.9808	3.77703	4.3725	4.29288	4.52037	0	0	0.00854	0	1.08	3.28	3.97	0.24	0.18	0.22	0	2.23	0	0.287729	0.00123899	9.21388e-05	0.809926	0.856928	0.830833	1	0.310319	1	1	0.326432	0.0176395	1	1	1	1	1	1
ENSG00000112773.16	TENT5A	1	8	3.86335	5.27765	6.89996	11.8432	3.85054	8.00634	7.21916	13.1869	0	0.001932	0.00099	0.002428	0.66	0.96	1.89	1.07	0.88	1.72	2.31	1.58	3.02	0.207006	0.0664288	0.000309629	0.040583	0.0920644	0.00102192	0.211574	0.448153	0.0837232	1	1	0.0384993	1	1	0.18612	1	1	0.433423
ENSG00000175274.19	TP53I11	1	8	1.13499	1.32302	1.63508	1.54882	0.052817	0.146844	0.199269	0.36393	2.59663	3.88821	4.9369	5.13237	0.38	0.65	0.7	1.52	1.83	2.83	0.37	1.04	1.33	0.494457	0.240256	0.205995	0.0120366	0.00224939	6.25954e-06	0.500954	0.0580619	0.0151839	1	1	0.91081	1	1	0.00530829	1	0.825265	0.182243
ENSG00000213096.11	ZNF254	1	8	10.3439	9.1886	10.1494	8.21186	0.390676	0.281416	0.289056	0.0719685	5.33171	4.9086	3.63563	1.95498	-0.01	0.09	-0.09	-0.45	-0.46	-2.06	-0.28	-0.48	-1.14	0.97342	0.813474	0.823643	0.288578	0.272465	9.54954e-05	0.475079	0.215133	0.00333007	1	1	1	1	1	0.0417735	1	1	0.0793062
ENSG00000260537.2	AC012184.2	1	7	1.94674	1.09267	0.817617	0.82744	1.68103	0.701529	0	0.533543	2.44598	4.81833	3.06754	3.64367	-0.63	-1.14	-0.98	-1.24	-10.72	-1.9	0.74	0.32	0.79	0.689868	0.469743	0.534389	0.431839	5.09077e-07	0.23286	0.639813	0.84077	0.61423	1	1	1	1	0.00210362	1	1	1	0.925027
ENSG00000258088.1	AC078820.1	1	7	0.916698	1.12788	1.88978	2.64048	2.5068	3.49401	3.77777	5.33703	0	0.007516	0	0	0.47	1.17	1.79	0.49	0.58	0.99	1.46	0	0	0.215747	0.00167734	1.21805e-06	0.160359	0.0983777	0.00710423	0.475916	1	1	1	0.393206	0.000839479	1	1	0.519643	1	1	1
ENSG00000235288.3	AC099329.1	1	7	3.7835	1.38547	5.21731	6.94188	0.0031395	0.011288	1.01945	0	0	0.0114495	14.1675	13.2492	-1.15	0.59	1.18	1.36	7.97	1.38	1.73	12.46	12.51	0.697496	0.840829	0.69056	0.688879	0.0142695	0.694924	0.620545	0.000152316	0.000143107	1	1	1	1	1	1	1	0.0510282	0.0130295
ENSG00000166153.16	DEPDC4	1	7	1.40565	0.946364	1.10197	0.835287	0.679244	0.934894	0.741055	1.18156	3.84618	2.70737	2.10118	1.01868	-0.39	-0.23	-0.5	0.45	0.09	0.51	-0.61	-0.77	-1.59	0.430202	0.642374	0.310045	0.359804	0.85425	0.34475	0.209172	0.112433	0.00116472	1	1	0.986273	1	1	1	1	0.994778	0.0441642
ENSG00000106003.13	LFNG	1	7	1.34699	0.996937	0.88582	0.587573	1.13134	1.19271	1.05082	1.34027	0.249424	0.389342	1.90533	2.11461	-0.2	-0.48	-0.96	0.11	-0.13	0.18	0.43	3.1	3.22	0.829395	0.608635	0.306201	0.91004	0.891323	0.847281	0.65241	0.00100247	0.000632149	1	1	0.984887	1	1	1	1	0.140699	0.0298321
ENSG00000085276.19	MECOM	1	7	2.16981	2.42423	3.05437	3.29	2.24592	1.93249	1.77926	0.981788	0.280709	0.216716	0.057069	0.0361315	0.3	0.61	0.85	-0.17	-0.3	-1.26	-0.57	-2.09	-2.56	0.67974	0.407589	0.246141	0.819424	0.686903	0.0885647	0.459621	0.00925373	0.00137768	1	1	0.952434	1	1	1	1	0.414669	0.0490983
ENSG00000162591.16	MEGF6	1	7	0.169853	0.094222	0.069865	0.159925	0.518451	1.92758	1.92463	5.11407	2.43044	2.66169	4.34293	4.50227	-0.63	-1.15	0.17	1.89	1.84	3.22	-0.05	1.03	1.19	0.395155	0.125521	0.816355	0.00837069	0.0100346	6.9819e-06	0.94013	0.147598	0.0955955	1	1	1	1	1	0.00559786	1	1	0.461147
ENSG00000254535.4	PABPC4L	1	7	1.29761	1.15876	1.17868	0.908654	0.001556	0.006528	0.0014215	0	4.91	5.4137	8.41326	4.97919	-0.01	-0.02	-0.26	2.19	-0.13	-13.72	0.02	0.84	0	0.998174	0.994278	0.919694	0.470342	0.969688	3.08476e-05	0.994201	0.746943	0.999548	1	1	1	1	1	0.0167422	1	1	1
ENSG00000198732.11	SMOC1	1	7	0.911479	1.38367	2.77032	5.24454	3.69679	4.76229	4.56439	5.73015	0.265036	0.179671	0.124045	0.188197	0.79	1.72	2.77	0.41	0.27	0.63	-0.74	-0.97	-0.22	0.200202	0.00511949	6.78739e-06	0.499213	0.655574	0.305153	0.299504	0.190759	0.757974	1	0.68871	0.00287238	1	1	1	1	1	0.958969
ENSG00000251893.2	SNORA70	1	7	0.997518	1.19843	3.15799	8.33809	5.90581	10.9919	12.5082	7.4755	0	0	0	0	0.47	1.83	3.35	0.92	1.1	0.43	0	0	0	0.597404	0.0301326	3.53663e-05	0.139849	0.0771252	0.543579	1	1	1	1	1	0.00898007	1	1	1	1	NA	NA
ENSG00000159167.12	STC1	1	7	0.689006	1.40511	1.98339	4.80707	61.4223	70.5045	69.6112	76.4578	0.0116645	0.019488	0.0159215	0.053317	1.28	1.65	3.07	0.24	0.19	0.27	0.62	0.49	2.3	0.121008	0.0450366	0.000196078	0.773049	0.821816	0.742644	0.531902	0.629102	0.0160938	1	1	0.0299354	1	1	1	1	1	0.190137
ENSG00000162526.7	TSSK3	1	7	0.5881	0.630093	1.06829	1.62583	0.841081	1.40702	1.29952	1.52277	0.921008	1.30355	0.927189	1.16427	0.26	0.96	1.7	0.76	0.6	0.85	0.3	0.17	0.6	0.566511	0.0274364	7.35916e-05	0.0675598	0.149334	0.0691778	0.483185	0.694855	0.159475	1	1	0.0158498	1	1	1	1	1	NA
ENSG00000213967.11	ZNF726	1	7	10.1195	7.29466	6.62676	3.63298	1.1683	0.833805	1.05708	0.696446	0.929416	1.65422	0.923436	0.919658	-0.3	-0.49	-1.23	-0.46	-0.18	-1.02	0.67	0.07	0.24	0.335827	0.113708	7.58172e-05	0.180014	0.603302	0.0127091	0.050072	0.832115	0.487318	1	1	0.0161846	1	1	0.705291	1	1	0.87766
ENSG00000272031.3	ANKRD34A	1	6	0.609976	0.931711	1.04067	1.42039	0.349565	0.388707	0.351743	0.53587	2.1533	2.58104	2.8032	2.79457	0.79	0.89	1.49	0.17	0.01	0.57	0.07	0.45	0.62	0.0564745	0.0305433	0.000300162	0.684884	0.976892	0.193908	0.856682	0.272664	0.128579	1	1	0.037711	1	1	1	1	1	0.529018
ENSG00000281591.1	DBET	1	6	0.309827	0.246756	1.28047	2.40372	0.100368	0.126009	0.0748735	0.167101	2.70031	4.62026	6.54452	8.21498	-0.18	2.18	3.21	0.4	-0.42	0.54	0.58	1.41	2	0.824588	0.00734969	8.13379e-05	0.630559	0.619642	0.544825	0.471167	0.0806297	0.0130084	1	0.779117	0.0169141	1	1	1	1	0.897028	0.167322
ENSG00000116661.11	FBXO2	1	6	0.584824	0.681724	2.16702	2.33805	0.150628	0.187044	0.281707	0.414324	13.8434	17.3219	25.7738	26.2046	0.43	2.02	2.26	0.33	0.81	1.48	0.14	1	1.09	0.488651	0.00100173	0.000234125	0.609692	0.203996	0.0259916	0.816386	0.0968036	0.0691062	1	0.298726	0.0330267	1	1	0.922364	1	0.951761	0.393564
ENSG00000167191.12	GPRC5B	1	6	0.759504	0.722481	0.86473	0.784512	1.65077	1.88055	1.73286	1.62555	0.587132	0.892458	1.27804	1.69753	0.13	0.31	0.28	0.21	0.05	-0.04	0.4	1.21	1.84	0.794877	0.533369	0.574785	0.67501	0.912968	0.935447	0.419363	0.0141795	0.000195815	1	1	1	1	1	1	1	0.493182	0.0153746
ENSG00000183793.14	NPIPA5	1	6	0.0555225	0.0538295	0.03012	0.025527	3.51027	3.67821	3.17521	3.35589	2.19605	2.18812	0.99269	0.809674	0.27	-0.64	-0.89	0.1	-0.16	-0.12	-0.16	-1.04	-1.16	0.64469	0.351274	0.204755	0.733376	0.600183	0.709257	0.598428	0.000831174	0.000235264	1	1	0.909319	1	1	1	1	0.129946	0.0170654
ENSG00000279012.2	OR51B2	1	6	0.675543	0.877734	1.96832	2.24416	5.99594	6.78917	7.56089	7.1038	0.0330055	0	0	0.012306	0.5	1.65	1.98	0.2	0.3	0.16	-3.78	-3.59	-1.14	0.361856	0.00243881	0.000256221	0.697676	0.563587	0.760948	0.0230418	0.0306961	0.383467	1	0.475234	0.0347222	1	1	1	1	0.678814	0.820087
ENSG00000258245.1	RPL10P13	1	6	0.828371	0.800254	2.11388	3.00496	4.74578	4.70948	3.71551	7.89177	0	0	0	0.0268435	0.1	1.44	2.08	0.01	-0.35	0.62	0	0	1.76	0.850257	0.00363275	1.72799e-05	0.980978	0.404725	0.159872	1	1	0.385106	1	0.599786	0.00541333	1	1	1	1	1	NA
ENSG00000182580.3	EPHB3	1	5	2.08802	1.92246	2.17676	2.0472	0.495318	0.963654	0.879318	1.27054	0.157179	0.414271	0.779239	0.938861	0.02	0.17	0.22	0.98	0.8	1.33	1.18	2.51	2.87	0.9781	0.804369	0.746478	0.148283	0.239859	0.0518129	0.0879302	0.000241939	2.77748e-05	1	1	1	1	1	1	1	0.0654662	0.00460115
ENSG00000247498.10	GPRC5D-AS1	1	5	1.43235	0.825591	0.530237	0.18584	0.116635	0.0299435	0.147479	0.0470145	3.70954	4.39933	4.61311	4.78023	-0.65	-1.32	-2.68	-1.75	0.43	-1.45	0.06	0.38	0.52	0.335939	0.0540716	0.000285745	0.0761725	0.604002	0.176433	0.926783	0.548897	0.420703	1	1	0.0368596	1	1	1	1	1	NA
ENSG00000267278.6	MAP3K14-AS1	1	5	0.307229	0.373294	0.647902	1.04279	0.104159	0.112116	0.168015	0.232542	3.36032	3.52253	3.76068	3.86248	0.44	1.19	2.01	0.14	0.65	1.17	-0.1	0.25	0.44	0.290929	0.00364685	6.89931e-07	0.763118	0.148532	0.0184767	0.788077	0.506676	0.248136	1	0.599786	0.000594376	1	1	0.819283	1	1	0.699971
ENSG00000258590.5	NBEAP1	1	5	0.337479	0.413911	1.37806	2.00884	0.958202	2.37582	2.65521	3.59882	0.0610525	0.143953	0.123526	0.0842115	0.48	2.15	2.8	1.32	1.44	1.87	1.1	1.19	0.91	0.545521	0.00651165	0.000394066	0.0880805	0.064052	0.0168388	0.202195	0.168634	0.287912	1	0.745597	0.044705	1	1	0.79715	1	1	0.737766
ENSG00000172260.15	NEGR1	1	5	1.44313	1.37788	0.699397	0.665173	3.22978	1.75211	1.89008	0.444028	0.477034	0.635107	0.406371	0.354972	0.11	-0.93	-0.86	-0.79	-0.7	-2.96	0.24	-0.13	-0.16	0.88153	0.203651	0.240201	0.279802	0.336989	6.12037e-05	0.74565	0.85503	0.824215	1	1	0.947629	1	1	0.0300525	1	1	0.970548
ENSG00000168824.14	NSG1	1	5	0.344903	0.349259	0.327155	0.400124	0.274713	0.607008	0.595876	1.02959	1.98009	3.67282	6.85432	7.63129	0.2	0.05	0.45	1.15	1.06	1.94	0.73	1.93	2.21	0.747416	0.933487	0.463583	0.059414	0.0820754	0.00183992	0.226842	0.00140131	0.000264328	1	1	1	1	1	0.261413	1	0.17096	0.0187521
ENSG00000197249.14	SERPINA1	1	5	1.20818	1.6194	5.69772	7.60356	0.025165	0.889712	0.373418	1.74888	0.002163	0.0014745	0.0468245	0.019969	0.7	2.37	2.91	5.09	3.86	5.99	-0.85	4.26	2.98	0.604482	0.0774995	0.0305095	0.000245844	0.0054313	1.69636e-05	0.697337	0.0148327	0.0934956	1	1	0.503592	0.38329	1	0.0108174	1	0.503373	0.457316
ENSG00000176422.14	SPRYD4	1	5	0.817734	0.782739	0.96111	1.11605	0.786998	0.891211	0.907657	0.887636	1.34385	1.61952	1.67136	1.55551	0.12	0.35	0.71	0.2	0.19	0.16	0.09	0.42	0.51	0.551418	0.0740031	0.000363529	0.309727	0.338893	0.439509	0.631863	0.0323746	0.0100042	1	1	0.0425682	1	1	1	1	0.681744	0.144131
ENSG00000183632.14	TP53TG3	1	5	1.50141	0.962309	0.800612	0.915684	1.92607	2.08523	1.38183	1.51102	0.029294	0	0.014287	0	-0.46	-0.79	-0.45	0.15	-0.42	-0.24	-17.69	-0.78	-16.66	0.71413	0.531274	0.717074	0.904693	0.737958	0.849846	4.02992e-19	0.612225	3.77749e-17	1	1	1	1	1	1	2.10636e-14	1	NA
ENSG00000196656.7	AC004057.1	1	4	0.0630645	0	0	6.91243	4.41537	0	0	0	0	0.0378905	20.2375	66.7588	-16.5	-16.26	7.13	-22.69	-22.82	-20.66	15.32	25.03	26.8	0.0234489	0.0255518	0.317827	0.00165834	0.00156139	0.00417772	0.0370762	0.000521705	0.000203265	1	1	0.98866	1	1	0.400014	1	0.103878	0.0155544
ENSG00000258168.6	AC025569.1	1	4	0.106925	0.151927	0.225209	0.301611	2.67492	3.4683	3.33177	5.69787	0.093333	0.105	0.061983	0.0947735	0.65	1.19	1.74	0.4	0.31	0.97	0	-0.51	0.25	0.134607	0.00572316	5.20139e-05	0.32478	0.44795	0.0181507	0.999251	0.254649	0.564418	1	0.702758	0.0122827	1	1	0.818526	1	1	0.910985
ENSG00000248927.1	AC114284.1	1	4	0.0097625	0.003229	0.009078	0.004781	0.113063	0.045974	0.0173825	0	3.3909	2.60876	2.54318	1.12721	-1.41	-0.03	-0.85	-1.22	-2.65	-19.11	-0.59	-0.33	-1.03	0.630854	0.990552	0.772351	0.612231	0.281728	6.54922e-12	0.802822	0.889572	0.663256	1	1	1	1	1	3.55452e-08	1	1	NA
ENSG00000186517.14	ARHGAP30	1	4	0.0926435	0.0976555	0.303534	0.313551	2.58387	2.89682	2.93445	3.10042	0.026815	0.064801	0.437893	0.470367	0.31	1.85	2.01	0.19	0.18	0.2	1.13	4.18	4.24	0.814876	0.154541	0.122316	0.883823	0.89153	0.87539	0.392796	0.00141531	0.00123069	1	1	0.812813	1	1	1	1	0.171676	0.0456961
ENSG00000185742.7	C11orf87	1	4	0.003467	0.007032	0	0.0031515	0.020244	0.032311	0.016457	0.0096485	2.34165	2.18656	2.19443	1.39802	1.11	-16.97	0.14	0.69	-0.31	-0.74	-0.31	-0.01	-0.19	0.689533	4.30156e-08	0.961188	0.795168	0.905705	0.78999	0.904092	0.99694	0.942528	1	0.000106119	1	1	1	1	1	1	0.993879
ENSG00000171860.5	C3AR1	1	4	0.117666	0.082917	0.342886	0.558334	1.55729	1.63745	1.33961	1.76433	0.0032235	0.0045215	0.0015645	0.00529	-0.28	1.69	2.52	0.11	-0.22	0.13	0.44	-0.83	1.09	0.702296	0.0186852	0.000419533	0.873953	0.74588	0.851138	0.766311	0.656683	0.446354	1	1	0.0461413	1	1	1	1	1	0.857717
ENSG00000223552.1	CCR5AS	1	4	0.0186585	0.046847	0.01483	0	0.010045	0.0369715	0.017879	0	2.67674	2.82617	2.70977	3.56995	1.51	-0.17	-11.23	1.76	0.69	-40.82	-0.04	0.08	0.4	0.691031	0.964358	0.00531364	0.647129	0.858009	7.15846e-24	0.990628	0.981509	0.912938	1	1	0.214498	1	1	1.94259e-19	1	1	NA
ENSG00000140937.14	CDH11	1	4	0.229261	0.086016	0.0401595	0.0128665	16.8694	26.0537	26.8514	39.2897	0.007979	0.022673	0.015816	0.0268375	-1.24	-2.72	-4.2	0.68	0.65	1.19	1.37	1.09	2.21	0.175117	0.0039095	8.35371e-05	0.408718	0.429768	0.144824	0.218533	0.32904	0.0437608	1	0.610181	0.0169929	1	1	1	1	1	0.313662
ENSG00000137975.8	CLCA2	1	4	0.017154	0.0372585	0.14525	0.55413	1.59934	5.35099	5.18259	9.77262	0.0107915	0.0181075	0.0699785	0.0508535	1.3	3.23	5.32	1.76	1.68	2.57	0.59	2.88	2.7	0.224666	0.00222433	3.96222e-07	0.0499838	0.0618098	0.00424497	0.591643	0.00566792	0.0092517	1	0.454206	0.000398237	1	1	0.400165	1	0.333223	0.136717
ENSG00000162699.5	DNAJA1P5	1	4	0.005924	0.003494	0.00425	0	0.0081935	0.0034155	0	0.0095225	6.98205	8.84889	6.6499	3.78278	-0.55	-0.28	-11.8	-1.14	-40.68	0.77	0.13	0.02	-0.32	0.893528	0.946056	0.00439423	0.776344	6.61558e-24	0.84571	0.97172	0.996406	0.929184	1	1	0.197388	1	1.23017e-19	1	1	1	0.991328
ENSG00000175065.12	DSG4	1	4	0.0009995	0.0038825	0	0	0.0014355	0.0039275	0.0054215	0.003146	25.1243	26.1836	23.8009	14.4256	2.04	-20.69	-11.8	1.37	1.86	1.53	-0.16	0.01	-0.24	0.523594	1.75675e-09	0.000597324	0.652302	0.535902	0.627949	0.955054	0.997872	0.930341	1	6.81041e-06	0.059504	1	1	1	1	1	0.991328
ENSG00000223839.8	FAM95B1	1	4	0.156314	0.143041	0.160318	0.165564	3.35635	3.61902	4.98083	3.53711	0.089954	0.171616	0.319711	0.38373	0.02	0.15	0.34	0.11	0.52	0	0.76	2.03	2.36	0.978524	0.808268	0.58998	0.850909	0.39431	0.9991	0.230997	0.00129083	0.000172537	1	1	1	1	1	1	1	0.162728	0.0145752
ENSG00000066468.23	FGFR2	1	4	0.44644	0.443391	0.383395	0.381699	0.164718	0.174589	0.133581	0.167195	1.27011	1.88738	2.33981	2.5951	0.15	-0.1	0.03	0.13	-0.34	-0.08	0.41	0.98	1.34	0.625136	0.751819	0.915258	0.695141	0.317209	0.831971	0.168884	0.000926315	6.67559e-06	1	1	1	1	1	1	1	0.138658	0.00197323
ENSG00000160219.12	GAB3	1	4	0.110153	0.0812175	0.184513	0.317466	1.85454	1.85481	1.86523	1.55183	0.0793525	0.10173	0.103125	0.134159	-0.22	0.9	1.83	0.01	0	-0.33	0.24	0.51	1.05	0.557345	0.0150828	5.70223e-07	0.981526	0.99077	0.33647	0.535803	0.196239	0.00708402	1	1	0.000529036	1	1	1	1	1	0.118526
ENSG00000278588.2	H2BC10	1	4	71.5061	49.9339	27.5281	15.629	0.010081	0	0.008332	0	0.009839	0.012691	0.0121525	0	-0.36	-1.26	-1.94	-1.3	0	0.68	-0.01	0.18	-1.22	0.407115	0.00360778	7.82514e-06	0.528609	0.999082	0.735692	0.996285	0.929971	0.559069	1	0.599786	0.00309439	1	1	1	1	1	0.908819
ENSG00000276180.1	H4C9	1	4	42.033	25.9911	13.8513	6.35184	0.339639	0.578188	0.547906	0.877511	0.424837	0.390317	0.226591	0.210402	-0.6	-1.5	-2.48	0.79	0.69	1.34	-0.32	-0.8	-0.76	0.377876	0.0288656	0.00029933	0.262085	0.332331	0.0662413	0.652131	0.266576	0.293826	1	1	0.037711	1	1	1	1	1	0.74282
ENSG00000235750.10	KIAA0040	1	4	10.6828	5.27552	6.88045	6.82453	0.0071305	0.038955	0.0186235	0.255427	0.00304	0.0030045	0	0.003415	-0.92	-0.53	-0.4	2.42	1.34	4.62	-0.16	-2.68	0.5	0.283206	0.535068	0.637122	0.0152274	0.184301	1.64014e-05	0.912242	0.154319	0.736641	1	1	1	1	1	0.0108174	1	1	0.955963
ENSG00000102271.14	KLHL4	1	4	0.03298	0.044758	0.04387	0.072645	3.6182	3.13855	3.02673	2.97429	0.0274335	0.020492	0	0.0046725	0.59	0.49	1.35	-0.18	-0.25	-0.36	-0.62	-6	-2.34	0.369341	0.450908	0.0335101	0.737683	0.644336	0.520781	0.38026	0.000124582	0.00886774	1	1	0.522163	1	1	1	1	0.0473479	0.13363
ENSG00000267712.6	LINC01539	1	4	0.0081775	0.030078	0.0090865	0.01132	0.0084165	0.014253	0.019148	0	2.89621	4.60789	4.15846	3.5555	2.23	0.36	0.78	0.73	0.97	-15.22	0.46	0.61	0.86	0.475883	0.911843	0.807507	0.809238	0.750851	3.45993e-06	0.868295	0.825709	0.75718	1	1	1	1	1	0.00312973	1	1	NA
ENSG00000148948.8	LRRC4C	1	4	0.015589	0.03418	0	0.007544	0.000907	0.016406	0.000758	0.00211	14.1388	14.2263	12.0908	8.12448	1.31	-18.17	-0.71	4.17	-0.05	1.88	-0.2	-0.14	-0.24	0.635961	5.25882e-09	0.799818	0.175063	0.987432	0.561993	0.939227	0.958406	0.928342	1	1.78386e-05	1	1	1	1	1	1	0.991076
ENSG00000153208.17	MERTK	1	4	0.101131	0.119835	0.100759	0.760158	0.536875	0.50241	0.449142	0.755583	5.20157	5.22366	5.0601	4.30471	0.41	0.11	3.19	-0.03	-0.29	0.38	-0.15	0.09	-0.01	0.541732	0.867272	1.38513e-06	0.960866	0.651527	0.563015	0.810936	0.89076	0.985444	1	1	0.000879264	1	1	1	1	1	0.998796
ENSG00000172936.16	MYD88	1	4	1.94756	1.74104	2.36343	3.10527	0.016121	0.0168605	0.02077	0.033081	0.0182345	0.0356315	0.112627	0.0674975	0	0.39	0.94	0.03	0.25	0.53	0.77	2.68	2.09	0.992822	0.439993	0.0652219	0.969936	0.752865	0.556593	0.268023	4.19277e-05	0.00173738	1	1	0.678239	1	1	1	1	0.0268159	0.0566905
ENSG00000269405.7	NXF2	1	4	1.60283	1.27391	1.83294	1.43941	0.0125435	0.018767	0.0093905	0.0445805	0	0.0019965	0.0017155	0	-0.28	0.3	0.1	0.76	-0.2	1.62	14.86	15.15	0	0.934408	0.930243	0.977071	0.828603	0.955182	0.648169	0.000194095	0.000137148	1	1	1	1	1	1	1	1	0.0482958	1
ENSG00000118733.17	OLFM3	1	4	0.0332745	0.038263	0.017604	0.02986	0	0.0037885	0	0	55.0575	46.6058	40.5068	18.392	0.26	-0.79	0.11	16.33	0	0	-0.46	-0.36	-1.02	0.925138	0.783355	0.969751	5.56906e-07	1	1	0.86921	0.897025	0.710998	1	1	1	0.002309	1	1	1	1	0.94827
ENSG00000171759.10	PAH	1	4	0.0318855	0.035742	0.007425	0.0041035	0.004482	0.0363755	0.005876	0	10.1505	7.56041	5.34126	2.57972	0.44	-1.82	-2.64	2.78	0.12	-15.89	-0.64	-0.84	-1.42	0.877766	0.532654	0.39567	0.336373	0.968824	6.68582e-07	0.812798	0.753889	0.597128	1	1	1	1	1	0.000742144	1	1	0.920136
ENSG00000221866.9	PLXNA4	1	4	0.0069635	0.01743	0.010506	0.177909	6.72566	5.23661	4.41489	2.99753	0.0222	0.0197405	0.007204	0.007727	1.46	0.78	5	-0.29	-0.57	-1.24	-0.38	-1.65	-1.16	0.217924	0.510772	1.86136e-05	0.792331	0.608526	0.262852	0.751078	0.181314	0.333569	1	1	0.00561246	1	1	1	1	1	0.781792
ENSG00000113319.13	RASGRF2	1	4	0.037592	0.0480345	0.0161665	0.0061585	4.68229	3.71258	3.93028	3.24871	0.004777	0.024406	0.00969	0.006255	0.47	-1.14	-2.54	-0.29	-0.25	-0.58	2.11	1.06	0.49	0.354791	0.075157	8.87636e-05	0.447151	0.516991	0.140242	0.00363824	0.195076	0.583471	1	1	0.0172674	1	1	1	1	1	0.915386
ENSG00000257529.5	RPL36A-HNRNPH2	1	4	0.90759	0.029353	0.80452	2.82781	0.216274	0.175182	0.262015	0.341166	1.13703	21.79	0.753907	66.1983	-4.8	-0.07	1.84	-0.22	0.23	0.97	3.97	-0.39	6.27	0.00154436	0.957798	0.170613	0.876528	0.86636	0.499685	0.00304379	0.773964	2.94238e-06	1	1	0.876398	1	1	1	1	1	0.00110891
ENSG00000180730.5	SHISA2	1	4	2.73489	5.88526	11.3124	20.6126	0.268074	0.464378	0.35145	0.747435	0.006047	0.0140375	0.0084695	0.0083025	1.23	2.17	3.19	0.79	0.37	1.38	1.03	0.58	0.89	0.0601559	0.000960559	1.17979e-06	0.234567	0.581492	0.0432102	0.348871	0.62084	0.426426	1	0.292884	0.000837028	1	1	1	1	1	0.847398
ENSG00000028137.19	TNFRSF1B	1	4	1.86473	1.53374	2.15818	1.74258	0.115788	0.184197	0.227521	0.993512	0.0700955	0.057318	0.077891	0.0841655	-0.1	0.33	0.15	0.7	0.97	2.68	-0.47	0.19	0.42	0.880743	0.600473	0.813998	0.285643	0.137019	9.69795e-05	0.489617	0.783874	0.5373	1	1	1	1	1	0.0417735	1	1	0.897584
ENSG00000236404.10	VLDLR-AS1	1	4	0.313609	0.207274	0.133289	0.117861	1.28894	0.873027	0.762501	0.265113	5.64179	4.98313	2.08997	0.588051	-0.45	-1.13	-1.17	-0.51	-0.77	-2.11	-0.29	-1.32	-3.02	0.516482	0.107669	0.0954547	0.451605	0.256608	0.0033331	0.668328	0.050499	9.481e-06	1	1	0.760502	1	1	0.356104	1	0.786591	0.00242248
ENSG00000204396.11	VWA7	1	4	0.929281	0.648471	1.09706	0.95591	0.803709	1.40884	1.25972	2.84165	0.739874	0.928531	0.654331	0.581013	-0.34	0.37	0.29	0.83	0.62	1.68	0.21	0.03	-0.06	0.434109	0.386392	0.493847	0.0436518	0.130607	6.62794e-05	0.625243	0.946855	0.8865	1	1	1	1	1	0.0315548	1	1	NA
ENSG00000174460.4	ZCCHC12	1	4	0.002314	0.0026795	0.001748	0.0016835	0.0013505	0.004049	0.004523	0.003994	2.84173	4.28699	4.76596	8.69323	0.75	-0.02	-0.08	1.66	1.61	2.44	0.42	0.85	1.87	0.673105	0.990602	0.970396	0.329475	0.343757	0.162829	0.30761	0.0384125	5.06325e-06	1	1	1	1	1	1	1	0.725814	0.00169619
ENSG00000285798.1	AC092958.4	1	3	0.0158265	0.006279	0.0047865	0	0	0	0.0036585	0	2.25996	3.16427	0.87588	1.56697	-1.22	-1.63	-13.42	0	31.58	0	0.36	-1.31	-0.54	0.765293	0.696276	0.00133463	1	3.40465e-13	1	0.924247	0.733736	0.887166	1	1	0.0996716	1	3.16547e-09	1	1	1	NA
ENSG00000116785.14	CFHR3	1	3	0.446577	0.379354	1.37101	2.81086	0.29786	0.889349	0.667955	1.31838	0.026595	0.031715	0.005942	0.007877	-0.1	1.74	2.91	1.6	1.08	2.14	0.09	-1.96	-1.43	0.865495	0.00384239	1.27424e-06	0.00821245	0.0749555	0.000762957	0.918143	0.131055	0.220885	1	0.610181	0.000844966	1	1	0.151127	1	1	NA
ENSG00000080644.16	CHRNA3	1	3	0.016496	0.14204	0.100648	0.113771	0.0324415	0.0237995	0.036859	0.0490845	0.800781	1.3218	2.6878	2.08122	3.21	2.73	3.03	-0.3	0.21	0.42	0.53	1.92	1.71	0.000204798	0.000902635	0.000222868	0.759278	0.832611	0.694743	0.414584	0.00320327	0.00848843	0.432287	0.281549	0.0327807	1	1	1	1	0.253214	NA
ENSG00000248464.1	FGF10-AS1	1	3	0.0073245	0.004288	0	0.0109975	0.0755905	0.0967035	0.054446	0.038283	0.98577	2.06894	1.3732	1.64942	-0.59	-16.47	0.83	0.48	-0.47	-0.7	0.94	0.54	0.72	0.86267	3.13933e-06	0.800521	0.877557	0.879469	0.826193	0.758593	0.859837	0.814016	1	0.00401483	1	1	1	1	1	1	NA
ENSG00000164604.13	GPR85	1	3	0.057604	0.216781	0.352951	0.514999	0.894997	1.33418	1.10113	1.41035	0.0075115	0.0037685	0.006182	0.0068535	2.15	2.78	3.46	0.6	0.26	0.6	-1.04	-0.18	0.28	0.00639529	0.000350157	8.46876e-06	0.417071	0.720799	0.420201	0.41387	0.876942	0.794281	1	0.155774	0.00324259	1	1	1	1	1	0.965628
ENSG00000170961.7	HAS2	1	3	0.119855	0.120028	0.170057	0.172612	0.574581	1.48245	1.09551	2.25252	0.0054895	0.0049095	0.0077875	0.000923	0.19	0.63	0.78	1.38	0.91	1.93	-0.16	0.71	-1.97	0.703936	0.196316	0.111654	0.00243726	0.0450225	2.77764e-05	0.885732	0.495402	0.237698	1	1	0.793901	1	1	0.0160376	1	1	0.689496
ENSG00000204866.8	IGFL2	1	3	0	0.0424735	0.192501	0.464464	0.03388	0.09171	0.143085	0.569724	0.806318	1.09654	1.94815	1.68669	4.23	6.34	7.72	1.37	1.92	3.57	0.26	1.47	1.54	0.040197	0.0018057	0.000138339	0.386604	0.226078	0.0287164	0.853739	0.299668	0.276907	1	0.411776	0.0240073	1	1	0.950338	1	1	NA
ENSG00000089163.4	SIRT4	1	3	0.704682	0.779819	1.11219	1.40729	0.444323	0.430374	0.384746	0.670036	0.835528	0.986112	1.18649	0.956703	0.31	0.78	1.24	-0.02	-0.21	0.23	0.04	0.58	0.46	0.219254	0.00202954	4.6371e-07	0.950627	0.469778	0.467251	0.871769	0.0167555	0.0643039	1	0.430278	0.000447424	1	1	1	1	0.523913	NA
ENSG00000152779.14	SLC16A12	1	3	0.0381855	0.037436	0.0305665	0.028446	0.479603	1.37981	1.50342	2.38499	0.0447505	0.0321825	0.0516665	0.0491295	0.18	-0.2	-0.17	1.55	1.59	2.29	-0.65	0.31	0.38	0.77638	0.765744	0.792842	0.00516932	0.00391124	3.9856e-05	0.322504	0.619444	0.546583	1	1	1	1	1	0.0207995	1	1	0.902653
ENSG00000183780.13	SLC35F3	1	3	0.487211	0.30545	0.311985	0.324211	3.14117	1.62778	1.5262	0.772031	0.132749	0.123093	0.152756	0.0931925	-0.49	-0.52	-0.35	-0.89	-1.01	-2.03	-0.26	0.32	-0.21	0.338696	0.30377	0.488894	0.0723169	0.0411466	7.90344e-05	0.633969	0.556928	0.703935	1	1	1	1	1	0.035746	1	1	0.946217
ENSG00000169903.7	TM4SF4	1	3	0.013283	0.0103775	0.0035015	0	0	0.045353	0	0	0.833638	1.12243	2.12678	2.37072	-0.25	-1.75	-12.89	35.91	0	0	0.31	1.42	1.49	0.964943	0.765555	0.0280759	7.69652e-10	1	1	0.956481	0.800744	0.791127	1	1	0.483402	6.38214e-06	1	1	1	1	NA
ENSG00000269097.1	TPRG1LP1	1	3	0.0365935	0.0358775	0.322213	0.67867	0.413379	1.11594	1.5062	1.46335	0	0	0.0224135	0	0.15	3.27	4.47	1.45	1.81	1.94	0	3.11	0	0.898732	0.00153314	1.07396e-05	0.0485279	0.013362	0.0108004	1	0.0855261	1	1	0.374818	0.00380971	1	1	0.656528	1	0.910267	NA
ENSG00000036672.16	USP2	1	3	0.409865	0.534439	0.861239	1.29552	0.072393	0.160872	0.0993115	0.219071	0.904496	0.985885	1.72313	1.25283	0.59	1.2	1.91	1.19	0.46	1.68	-0.08	1.08	0.8	0.276217	0.0255019	0.00035903	0.0405776	0.431508	0.0060111	0.875466	0.0429163	0.132093	1	1	0.0423367	1	1	0.486935	1	0.756719	0.537149
ENSG00000250286.2	AC021491.2	1	2	0.0595965	0.204573	0.514088	0.632171	0.115377	0.298387	0.335603	0.482881	0.680738	0.94255	2.0002	2.44449	1.96	3.29	3.72	1.38	1.51	1.96	0.36	1.73	2.01	0.0424248	0.000545864	8.72261e-05	0.135904	0.101413	0.0461548	0.681035	0.0460991	0.02052	1	0.197508	0.0172465	1	1	1	1	0.767292	NA
ENSG00000285330.1	AC126283.2	1	2	0.737935	0.236612	0.989578	0.637095	0.084942	0.0359585	0.211383	0	0.991277	1.1775	1.0465	0.573535	-1.54	0.53	0.07	-1.23	1.31	-19.47	0.03	0.16	-0.24	0.620152	0.864318	0.981934	0.694553	0.674741	1.41406e-08	0.993145	0.959393	0.938895	1	1	1	1	1	3.48848e-05	1	1	0.993216
ENSG00000284640.1	AL590434.1	1	2	0.0317965	0.013894	0.007423	0	0.011869	0.025005	0.015441	0.0434845	0.0413535	0.125098	2.12494	1.67918	-1.04	-2.02	-5.12	1.09	0.41	1.54	1.45	5.91	5.51	0.46541	0.190487	0.0084137	0.446692	0.778562	0.324367	0.263729	4.17476e-06	1.78384e-05	1	1	0.272236	1	1	1	1	0.00611654	NA
ENSG00000103723.16	AP3B2	1	2	0.681793	0.546883	0.581735	0.762074	0.19651	0.177774	0.124922	0.133074	0.476567	0.839124	3.46142	3.54914	-0.18	-0.12	0.4	-0.11	-0.65	-0.38	0.71	3.07	3.1	0.841723	0.892978	0.663057	0.907713	0.497676	0.706971	0.445789	0.000892798	0.000800891	1	1	1	1	1	1	1	0.136546	0.0342995
ENSG00000162490.7	DRAXIN	1	2	0.117731	0.109081	0.205621	0.193232	0.107134	0.24459	0.199016	0.552871	0.374772	0.771948	1.51041	2.00389	0.03	0.92	0.95	1.19	0.88	2.25	0.83	2.18	2.83	0.965716	0.234425	0.221618	0.124166	0.25249	0.00388572	0.278711	0.00448103	0.000224681	1	1	0.932418	1	1	0.383443	1	0.291903	0.016685
ENSG00000136928.7	GABBR2	1	2	0.0036925	0.022482	0.162714	0.474379	0.274697	0.732421	0.469575	2.06088	0.120798	0.380356	0.914755	1.76564	2.55	5.54	7.19	1.47	0.76	2.53	1.46	3.2	4.25	0.11141	0.00029992	2.22519e-06	0.280807	0.578407	0.0758723	0.285278	0.0192223	0.00182266	1	0.135649	0.00124828	1	1	1	1	0.563123	NA
ENSG00000203618.6	GP1BB	1	2	0	0	0	0	0	0	0	0.633068	0	0	4.81645	4.54388	0	0	0	0	0	25.14	0	28.11	27.93	1	1	1	1	1	0.000505772	1	9.76481e-05	0.000107746	1	1	1	1	1	0.11281	1	0.0400721	NA
ENSG00000160223.17	ICOSLG	1	2	0.353196	0.422577	0.456952	0.338025	0.337575	0.37308	0.452203	0.506274	0.549819	0.897574	1.18337	1.39458	0.45	0.49	0.18	0.18	0.4	0.55	0.51	1.22	1.6	0.217704	0.182818	0.631521	0.618772	0.275733	0.148888	0.159748	0.000777475	1.06564e-05	1	1	1	1	1	1	1	0.123379	0.00259105
ENSG00000227268.5	KLLN	1	2	0.208293	0.338046	0.523484	1.31133	0.300756	0.714333	0.65685	1.16313	0.308722	0.394286	0.714282	0.629731	0.85	1.45	2.92	1.24	1.1	1.89	0.21	1.39	1.29	0.16982	0.0183847	1.84239e-06	0.0418778	0.0709774	0.00224125	0.73244	0.0225446	0.0341289	1	1	0.00105815	1	1	0.290902	1	0.603076	0.276164
ENSG00000118898.16	PPL	1	2	0.0429085	0.0273505	0.0724	0.111072	0.032365	0.028799	0.040971	0.0760155	0.0587255	0.246876	1.00883	1.79965	-0.45	0.95	1.68	-0.19	0.26	1.22	1.93	4.24	5.04	0.718584	0.442522	0.171753	0.879939	0.834957	0.332896	0.111879	0.000468796	3.20569e-05	1	1	0.876398	1	1	1	1	0.0995637	0.00519631
ENSG00000095303.17	PTGS1	1	2	0.505096	0.832503	1.30904	1.49606	0.074752	0.086684	0.077133	0.170691	0.034863	0.042382	0.022227	0.013927	0.87	1.5	1.83	0.29	0.1	0.8	0.07	-0.65	-1.06	0.0587796	0.00116183	7.00351e-05	0.57127	0.836937	0.15904	0.907953	0.282649	0.0929983	1	0.315286	0.0155957	1	1	1	1	1	0.456215
ENSG00000163220.11	S100A9	1	2	0	0.004417	0.024709	0.047506	0.377796	1.3839	0.944078	2.83332	0.0105935	0.041598	0.017941	0.0322835	1.25	3.41	4.52	1.89	1.32	2.81	1.68	0.74	1.63	0.540287	0.0426792	0.00463981	0.000293648	0.0120933	1.86911e-07	0.188696	0.595743	0.212716	1	1	0.202757	0.405834	1	0.000298365	1	1	NA
ENSG00000266733.7	TBC1D29P	1	2	0.687991	0.666798	1.02324	1.01776	0.364124	0.383393	0.446134	0.428192	0.275706	0.468764	0.411803	0.498652	0.12	0.7	0.82	0.08	0.29	0.22	0.57	0.67	1.12	0.698026	0.0267306	0.00890374	0.794529	0.374328	0.542215	0.0826506	0.042619	0.000676393	1	1	0.279629	1	1	1	1	0.752733	0.0309332
ENSG00000272112.1	AC011374.2	1	1	0.109299	0.216015	0.573362	0.737904	0.849836	0.714765	0.742384	1.10306	0.0457025	0.0981675	0.0171945	0.0839305	1.13	2.45	2.95	-0.23	-0.2	0.31	0.88	-1.42	1.11	0.18658	0.00238002	0.000229986	0.682475	0.721901	0.621173	0.438385	0.408258	0.316958	1	0.475234	0.0328268	1	1	1	1	NA	NA
ENSG00000270149.5	AL591806.2	1	1	0.351021	0.238661	0.721456	0	0.233339	0.219339	0.612047	1.35487	0.560882	0.510969	0.344888	0.606172	-0.27	1.16	-18.97	0	1.35	2.41	-0.44	-0.45	0.57	0.930368	0.707106	2.51728e-08	0.999461	0.661522	0.435357	0.885394	0.885194	0.852532	1	1	4.04812e-05	1	1	1	1	1	NA
ENSG00000197565.16	COL4A6	1	1	0.0151965	0.027732	0.0375005	0.0783535	0.279083	0.61761	0.692705	1.04613	0.0196125	0.026943	0.047156	0.0226525	0.97	1.4	2.6	1.16	1.29	1.89	0.26	1.42	0.48	0.159274	0.0438932	0.00012217	0.0593086	0.0354672	0.0021751	0.76934	0.0807545	0.564274	1	1	0.0215109	1	1	0.289382	1	0.897028	0.910948
ENSG00000065621.15	GSTO2	1	1	0.312986	0.430038	0.657601	0.700593	0.724871	0.836631	0.698275	1.61953	0.882621	0.830806	0.792773	0.579419	0.62	1.19	1.41	0.21	-0.06	1.01	-0.26	-0.03	-0.31	0.0787873	0.000743777	6.14406e-05	0.523473	0.849513	0.00374397	0.461158	0.922867	0.378026	1	0.247323	0.0140472	1	1	0.376297	1	1	0.816555
ENSG00000128052.10	KDR	1	1	0.200811	0.277644	0.506287	1.51513	0.06873	0.0660295	0.079084	0.0488615	0.001906	0.002978	0.0014175	0	0.69	1.45	3.18	-0.04	0.22	-0.82	0.37	-0.41	-2.75	0.286137	0.0241307	7.70483e-07	0.945998	0.743789	0.272119	0.770798	0.778128	0.123516	1	1	0.000640883	1	1	1	1	1	0.519121
ENSG00000197993.9	KEL	1	1	0.194994	0.164082	0.173726	0.308354	0.0335855	0.486189	0.429558	1.15614	0.179768	0.0291325	0.0810795	0.0717415	-0.09	-0.06	0.9	3.87	3.6	5.11	-2.66	-0.9	-0.85	0.936698	0.959701	0.423175	0.000779177	0.00174711	1.21537e-05	0.0307434	0.444468	0.474262	1	1	1	0.89119	1	0.00891394	1	1	NA
ENSG00000196734.9	LCE1B	1	1	0.026347	0	0.0968985	0.228348	0.0631885	0.584678	0.578379	1.2235	0.010318	0.00524	0.030737	0.0439895	-3.95	1.98	3.34	3.2	3.12	4.3	-1.03	1.8	2.57	0.0359476	0.114193	0.0064665	0.00334742	0.00423631	0.000102661	0.608963	0.248471	0.088385	1	1	0.239241	1	1	0.04353	1	1	NA
ENSG00000259070.7	LINC00639	1	1	0.277158	0.278682	0.310314	0.206301	1.26573	0.585916	0.716167	0.36887	0.323833	0.523663	0.229875	0.313327	0.15	0.28	-0.17	-1.09	-0.81	-1.9	0.51	-0.43	0.22	0.65371	0.407157	0.60761	0.000907933	0.01385	1.4506e-07	0.125378	0.204628	0.514479	1	1	1	0.941101	1	0.000246031	1	1	0.890199
ENSG00000231605.6	LINC01363	1	1	0.252431	0.39161	0.729122	1.6544	0.0148865	0.0067995	0.0178175	0.055816	0.02417	0.020863	0.005795	0	0.83	1.65	2.98	-1.23	0.06	1.55	-0.23	-1.79	-3.88	0.28642	0.0327514	9.93878e-05	0.337594	0.960952	0.19814	0.847055	0.224241	0.028982	1	1	0.0185848	1	1	1	1	1	NA
ENSG00000283436.1	LINC01958	1	1	0.002835	0.0057595	0.097799	0.176668	0.1404	0.499478	0.615561	1.07193	0.0052285	0.010956	0	0.0020555	1.22	5.14	6.11	1.87	2.1	2.91	0.85	-2.26	-0.93	0.515282	0.00222925	0.000260931	0.0343841	0.0173861	0.00111791	0.578621	0.250545	0.636704	1	0.454206	0.035163	1	1	0.197837	1	1	NA
ENSG00000258884.2	LINC02321	1	1	0.238316	0.223727	0.0945185	0.0311995	0.0797425	0.198151	0.254314	0.251648	0.606325	1.16307	0.549023	0.392398	0.1	-1.23	-2.68	1.34	1.64	1.83	0.83	-0.07	-0.44	0.869805	0.0673852	0.000228284	0.0429797	0.0131734	0.00938529	0.163972	0.909596	0.472088	1	1	0.03281	1	1	0.600681	1	1	NA
ENSG00000077264.15	PAK3	1	1	0.258357	0.472926	0.760914	1.25616	0.092749	0.0527145	0.07043	0.0754065	0.11511	0.129195	0.08324	0.104268	1.08	1.69	2.56	-0.8	-0.4	-0.62	0	-0.41	0.11	0.0524385	0.00248785	3.95846e-06	0.160977	0.478754	0.316861	0.99897	0.474976	0.84137	1	0.477638	0.00187228	1	1	1	1	1	0.97421
ENSG00000124208.16	PEDS1-UBE2V1	1	1	0.230001	0	0	0	0.0766445	0	0	0	0.348017	0	0.642366	1.21754	-29.46	-29.35	-19.23	-28.14	-28.23	-25.85	-30.03	1.13	2.02	4.44704e-05	4.73363e-05	0.00768843	9.65408e-05	9.15747e-05	0.000340585	3.15132e-05	0.873474	0.774881	0.0988085	0.0346299	0.259023	0.213477	0.170283	0.0922551	0.274522	1	NA
ENSG00000010319.7	SEMA3G	1	1	0.266977	0.283123	0.396562	0.509787	0.125354	0.592024	0.68068	1.03029	0.557252	0.640906	0.78742	0.817021	0.19	0.68	1.19	2.23	2.39	2.99	0.01	0.58	0.78	0.741588	0.2456	0.0431262	0.000146412	4.75042e-05	4.50769e-07	0.988302	0.318233	0.178104	1	1	0.579549	0.303521	0.098149	0.000531848	1	1	0.612146
ENSG00000099937.11	SERPIND1	1	1	0.126464	0.153155	0.419847	1.02793	0.163729	0.302806	0.25678	0.561282	0.0021275	0.0022945	0	0.001586	0.42	1.84	3.3	0.89	0.62	1.73	0.02	-1.4	0.11	0.642634	0.0416349	0.000246234	0.323145	0.489519	0.0576726	0.991793	0.523299	0.959525	1	1	0.0337418	1	1	1	1	1	NA
ENSG00000281453.1	TGFB2-OT1	1	1	0	0	0	0	0	0	0	0	6.78374	0	0	0	0	0	0	0	0	0	-28.73	-28.53	-28.48	1	1	1	1	1	1	6.79437e-05	7.6668e-05	7.89067e-05	1	1	1	1	1	1	0.507326	0.0367145	NA
ENSG00000161911.11	TREML1	1	1	0	0.0050595	0.0168235	0.0974245	0.036925	0.919369	0.974325	4.34736	0.009643	0.0104805	0.007661	0.0083195	1.9	3.43	6.09	4.61	4.63	6.81	0.02	0.36	0.22	0.390077	0.0907356	0.00171065	0.0005499	0.000519072	3.39668e-07	0.991267	0.864213	0.922361	1	1	0.117562	0.651415	0.665665	0.000418981	1	1	NA
ENSG00000109072.14	VTN	1	1	0.0483485	0.0767995	0.088052	0.10254	0.061645	0.125752	0.0926925	0.176726	0.0143805	0.0114945	1.51169	0.374563	0.84	0.98	1.35	1.06	0.59	1.41	-0.27	6.98	4.89	0.598784	0.54012	0.396212	0.500679	0.709913	0.38138	0.885218	6.21135e-05	0.0051316	1	1	1	1	1	1	1	0.033425	NA
ENSG00000202198.1	7SK	0	12	75.2841	13.8336	122.136	328.68	27.5089	7.21312	27.1293	6.18087	152.906	7.89025	409.33	38.3866	-2.31	0.79	2.4	-2.01	-0.04	-2.11	-4.61	1.51	-1.79	0.374569	0.76074	0.357095	0.440443	0.98873	0.417944	0.0767899	0.56069	0.491979	1	1	1	1	1	1	1	1	0.879011
ENSG00000121410.12	A1BG	0	12	15.8401	13.8964	19.4658	18.2655	2.47698	3.14634	2.76356	5.35213	3.99378	3.74846	3.96151	3.75345	0.05	0.43	0.45	0.37	0.17	1.02	-0.26	0.06	0.1	0.931477	0.487	0.460713	0.551124	0.788995	0.109945	0.671686	0.928243	0.870623	1	1	1	1	1	1	1	1	0.981355
ENSG00000268895.6	A1BG-AS1	0	12	2.14007	1.74352	2.64098	3.51081	1.00888	1.42594	1.27814	2.21632	1.93727	2.1965	1.99858	2.09439	-0.17	0.42	0.97	0.51	0.33	1.04	0	0.14	0.36	0.677104	0.307759	0.0172255	0.216508	0.420598	0.0141351	0.996328	0.738907	0.380377	1	1	0.380469	1	1	0.746271	1	1	0.818584
ENSG00000128274.17	A4GALT	0	12	4.63856	5.13284	5.20758	5.94844	4.83065	4.68204	4.36539	5.19929	1.32508	1.91345	2.25415	1.70946	0.39	0.3	0.61	-0.01	-0.13	0.04	0.34	0.87	0.65	0.514991	0.622202	0.310994	0.980972	0.826613	0.941943	0.573957	0.154948	0.289946	1	1	0.986332	1	1	1	1	1	0.740084
ENSG00000094914.14	AAAS	0	12	20.2737	17.7333	17.9474	18.0961	18.1708	17.4602	15.4471	17.6476	32.3859	29.4448	24.6502	17.4672	-0.03	-0.06	0.09	-0.03	-0.24	-0.1	-0.33	-0.34	-0.57	0.914582	0.841768	0.763811	0.905827	0.416092	0.728684	0.255178	0.24525	0.0526266	1	1	1	1	1	1	1	1	0.343291
ENSG00000081760.17	AACS	0	12	12.9929	12.4791	15.8238	16.3853	6.85314	7.9509	8.01215	8.56353	11.0651	13.4428	12.8286	14.433	0.11	0.4	0.59	0.24	0.21	0.26	0.12	0.3	0.56	0.802405	0.375268	0.194137	0.604036	0.643877	0.56775	0.787008	0.516275	0.217968	1	1	0.898255	1	1	1	1	1	0.667045
ENSG00000109576.14	AADAT	0	12	4.35076	3.41334	3.89921	2.88785	2.02821	1.98123	2.04527	1.81476	1.78776	1.9412	1.92274	1.20445	-0.17	-0.04	-0.35	-0.02	-0.02	-0.24	-0.09	0.19	-0.04	0.889207	0.974823	0.776097	0.985985	0.990076	0.846449	0.943836	0.875269	0.973597	1	1	1	1	1	1	1	1	0.996876
ENSG00000103591.13	AAGAB	0	12	25.6136	21.5788	24.8234	24.3107	23.6802	23.5264	22.5264	26.4835	32.0776	30.7278	27.928	22.1046	-0.06	0.07	0.17	0.01	-0.07	0.09	-0.23	-0.14	-0.27	0.769655	0.733495	0.430484	0.953408	0.749355	0.666273	0.28313	0.503424	0.218617	1	1	1	1	1	1	1	1	0.667762
ENSG00000115977.20	AAK1	0	12	5.81792	4.66553	4.32417	3.78351	5.23871	4.99074	6.05719	5.10567	6.37521	6.62996	4.29757	5.17586	-0.15	-0.31	-0.37	-0.03	0.19	-0.1	-0.1	-0.5	-0.06	0.561052	0.21745	0.141448	0.893145	0.461266	0.685678	0.703123	0.0494925	0.811868	1	1	0.842654	1	1	1	1	0.78007	0.969495
ENSG00000087884.14	AAMDC	0	12	5.47152	5.33196	4.95456	4.82189	6.29378	7.12451	6.80654	6.62637	8.93702	9.98011	8.63855	8.2523	0.14	-0.02	0.07	0.2	0.12	0.01	-0.01	0.02	0.06	0.746753	0.959005	0.868818	0.630651	0.777176	0.974972	0.97692	0.964924	0.88049	1	1	1	1	1	1	1	1	0.982657
ENSG00000127837.10	AAMP	0	12	36.7387	31.6857	31.2597	29.8993	43.0634	40.9022	36.8749	40.2586	41.906	41.3782	38.7522	35.3214	-0.01	-0.11	-0.05	-0.05	-0.22	-0.15	-0.19	-0.03	-0.04	0.97597	0.761798	0.898688	0.890913	0.542841	0.675787	0.609639	0.927712	0.907316	1	1	1	1	1	1	1	1	0.987762
ENSG00000131043.12	AAR2	0	12	13.1872	10.9824	12.911	14.2406	7.87325	7.56514	7.18639	6.98263	9.23317	8.82385	9.1682	7.42395	-0.11	0.09	0.36	-0.03	-0.14	-0.2	-0.24	0.08	-0.03	0.499474	0.586204	0.0209439	0.828341	0.369665	0.219761	0.133174	0.622916	0.827972	1	1	0.420657	1	1	1	1	1	0.971564
ENSG00000090861.17	AARS1	0	12	97.0579	69.9083	58.3733	35.783	51.3466	44.3671	39.6191	38.5895	97.099	94.3912	66.5504	48.5788	-0.36	-0.63	-1.2	-0.18	-0.38	-0.47	-0.19	-0.46	-0.77	0.461659	0.196629	0.0135201	0.717593	0.434	0.336679	0.69933	0.342423	0.110328	1	1	0.33832	1	1	1	1	1	0.492361
ENSG00000124608.5	AARS2	0	12	4.87834	4.21994	5.60735	5.5886	3.67537	4.15508	3.87181	4.3798	6.69722	7.86575	7.14091	6.88583	-0.06	0.32	0.44	0.19	0.06	0.18	0.03	0.17	0.37	0.857379	0.368402	0.207051	0.582453	0.857132	0.602974	0.926706	0.625532	0.288993	1	1	0.913067	1	1	1	1	1	0.739027
ENSG00000266967.7	AARSD1	0	12	25.0512	19.9506	19.1783	17.2925	8.60643	8.00236	7.45625	7.61128	19.4195	20.402	14.3069	14.2192	-0.13	-0.26	-0.29	-0.08	-0.21	-0.22	-0.11	-0.39	-0.16	0.654883	0.379823	0.333558	0.782788	0.479917	0.469014	0.702283	0.197469	0.582316	1	1	0.998272	1	1	1	1	1	0.915323
ENSG00000149313.11	AASDHPPT	0	12	27.2562	24.7639	28.9283	27.1329	27.7109	27.0882	24.7581	29.6393	48.4227	41.9397	37.2198	19.5111	-0.01	0.2	0.25	-0.01	-0.16	0.03	-0.34	-0.33	-1.07	0.973035	0.644597	0.563633	0.973392	0.704563	0.952962	0.423115	0.441123	0.0119433	1	1	1	1	1	1	1	1	0.158351
ENSG00000275700.5	AATF	0	12	29.703	24.941	23.9631	23.2771	21.1006	19.1595	16.893	17.7153	28.2858	27.2914	20.9058	20.1226	-0.08	-0.19	-0.1	-0.11	-0.32	-0.31	-0.23	-0.39	-0.21	0.726009	0.376626	0.636072	0.60923	0.144512	0.164665	0.294196	0.0755795	0.322807	1	1	1	1	1	1	1	0.888329	0.772164
ENSG00000251595.7	ABCA11P	0	12	1.29662	1.50828	1.84204	1.52703	1.10136	1.34754	1.34935	1.49541	2.66952	2.9673	2.68798	2.87923	0.31	0.61	0.48	0.29	0.28	0.35	0	0.11	0.29	0.646964	0.368979	0.479264	0.668109	0.681887	0.613118	0.998765	0.877453	0.675393	1	1	1	1	1	1	1	1	0.938564
ENSG00000154265.16	ABCA5	0	12	8.81894	9.03577	8.42577	6.69202	1.38311	2.08017	1.95774	2.16599	18.3622	21.2281	12.7146	13.5752	0.22	0.06	-0.15	0.61	0.5	0.55	0.08	-0.45	-0.26	0.63692	0.904523	0.750029	0.191298	0.284825	0.249264	0.860092	0.330619	0.571469	1	1	1	1	1	1	1	1	0.913079
ENSG00000135776.5	ABCB10	0	12	10.0103	8.84716	8.72979	7.77069	5.86816	6.23503	5.66529	6.53665	17.5282	16.4077	14.8832	8.60774	-0.03	-0.08	-0.12	0.1	-0.06	0.07	-0.26	-0.19	-0.71	0.91734	0.805483	0.727767	0.771761	0.850634	0.841999	0.431364	0.575627	0.0322806	1	1	1	1	1	1	1	1	0.268708
ENSG00000115657.14	ABCB6	0	12	9.29978	8.44339	12.3598	12.066	12.3557	12.8539	12.5396	13.748	23.1952	25.1685	24.5224	18.5048	0.04	0.53	0.63	0.1	0.02	0.13	-0.05	0.17	-0.04	0.871321	0.0206374	0.00648138	0.657719	0.937975	0.585082	0.821614	0.451855	0.876234	1	1	0.239424	1	1	1	1	1	0.982463
ENSG00000131269.19	ABCB7	0	12	18.878	15.5455	16.8584	16.1979	5.5453	5.42753	5.40147	6.64678	15.1218	15.4204	12.4865	9.35881	-0.1	-0.04	0.02	-0.01	-0.05	0.18	-0.14	-0.21	-0.41	0.608903	0.827946	0.908993	0.968505	0.797611	0.374783	0.474163	0.288876	0.0384184	1	1	1	1	1	1	1	1	0.292504
ENSG00000197150.13	ABCB8	0	12	6.37843	6.20981	5.84861	5.83152	7.27962	7.00143	7.54505	8.13901	36.2342	41.0819	33.6212	28.2227	0.12	-0.01	0.12	-0.04	0.03	0.08	-0.01	-0.04	-0.02	0.740083	0.978217	0.736798	0.912741	0.925194	0.833959	0.970618	0.919139	0.955379	1	1	1	1	1	1	1	1	0.994608
ENSG00000150967.18	ABCB9	0	12	8.22352	8.33253	29.9108	32.4338	20.4387	23.7576	22.7098	21.9399	4.40568	5.44658	5.09756	5.11379	0.25	1.99	2.21	0.25	0.14	0.05	0.14	0.29	0.43	0.71949	0.00439883	0.00156262	0.720059	0.836335	0.941973	0.846076	0.68316	0.534789	1	0.655884	0.11119	1	1	1	1	1	0.896369
ENSG00000103222.20	ABCC1	0	12	6.08972	5.88886	5.76775	6.21926	6.27733	6.75819	6.72077	6.26934	10.1358	12.284	11.0237	13.4337	0.16	0.04	0.28	0.14	0.09	-0.06	0.11	0.19	0.58	0.741117	0.925871	0.551563	0.770276	0.846951	0.894085	0.810265	0.683413	0.217365	1	1	1	1	1	1	1	1	0.666284
ENSG00000124574.15	ABCC10	0	12	13.2959	12.7745	15.5512	11.3071	13.8534	13.655	16.122	15.5276	15.7869	21.1511	17.6878	17.1414	0.1	0.34	0.01	0.01	0.2	0.08	0.24	0.26	0.41	0.591222	0.0606396	0.937383	0.970491	0.280882	0.669541	0.195236	0.150797	0.0242065	1	1	1	1	1	1	1	1	0.230111
ENSG00000108846.16	ABCC3	0	12	10.7845	5.71839	8.03617	6.51372	5.04115	5.21468	6.52785	7.34086	3.38806	4.40092	6.69057	5.5426	-0.71	-0.31	-0.51	0.09	0.36	0.5	0.25	1.07	0.75	0.556402	0.800919	0.676091	0.939749	0.767894	0.680746	0.838787	0.376739	0.537214	1	1	1	1	1	1	1	1	0.89758
ENSG00000125257.16	ABCC4	0	12	12.9776	11.5106	9.9941	8.30138	6.60285	4.85395	4.92749	3.83191	11.0638	11.5401	6.40352	6.86896	0.01	-0.26	-0.39	-0.41	-0.42	-0.84	-0.09	-0.76	-0.52	0.988438	0.578934	0.399824	0.379045	0.362592	0.0712862	0.843721	0.0998101	0.261614	1	1	1	1	1	1	1	0.96448	0.713075
ENSG00000114770.17	ABCC5	0	12	5.51455	5.43326	5.94045	6.21731	10.8892	11.4387	11.5811	11.8816	13.6181	15.1523	15.7431	14.4066	0.15	0.23	0.43	0.1	0.08	0.07	-0.01	0.3	0.35	0.348997	0.164212	0.00834005	0.529692	0.622332	0.661175	0.929363	0.0660903	0.0324504	1	1	0.27113	1	1	1	1	0.861349	0.269616
ENSG00000069431.11	ABCC9	0	12	2.31675	2.42335	2.492	2.0092	1.82826	1.54782	2.04783	1.67653	2.19656	2.83107	1.65876	1.96369	0.19	0.22	0.05	-0.22	0.13	-0.2	0.22	-0.34	0.1	0.645069	0.590421	0.909736	0.59302	0.742281	0.627091	0.591178	0.40442	0.805493	1	1	1	1	1	1	1	1	0.967802
ENSG00000101986.12	ABCD1	0	12	3.06026	2.43259	4.4472	4.97715	1.88819	2.27699	2.15938	3.28509	1.09316	1.34685	2.76714	2.94025	-0.15	0.66	0.95	0.28	0.19	0.74	0.15	1.47	1.61	0.778533	0.212093	0.0716985	0.592598	0.725396	0.163745	0.775592	0.0056156	0.00249451	1	1	0.701146	1	1	1	1	0.33107	0.0676346
ENSG00000117528.14	ABCD3	0	12	16.801	14.1999	16.3569	17.4347	14.6398	19.0628	18.0899	21.3465	16.6906	17.7434	20.133	13.3728	-0.08	0.08	0.3	0.4	0.29	0.48	-0.09	0.35	-0.02	0.729491	0.738587	0.191832	0.0826974	0.207771	0.0382962	0.703223	0.128773	0.948279	1	1	0.898255	1	1	1	1	1	0.994608
ENSG00000119688.21	ABCD4	0	12	11.6971	9.79761	12.1129	10.6635	9.11319	8.48729	8.84706	7.79649	15.3282	18.2176	15.7448	15.0212	-0.08	0.17	0.12	-0.08	-0.06	-0.26	0.08	0.11	0.22	0.691675	0.404158	0.554017	0.679608	0.77756	0.221497	0.702662	0.572284	0.27371	1	1	1	1	1	1	1	1	0.725291
ENSG00000164163.11	ABCE1	0	12	71.5897	56.738	59.0843	52.9668	60.6935	55.1231	49.1956	50.2149	87.2658	77.6281	81.1301	43.7504	-0.14	-0.16	-0.19	-0.12	-0.31	-0.33	-0.33	-0.04	-0.69	0.691309	0.647892	0.568466	0.72819	0.367686	0.330184	0.327632	0.899133	0.0439413	1	1	1	1	1	1	1	1	0.314388
ENSG00000204574.14	ABCF1	0	12	20.0482	16.1813	15.7395	17.3564	19.8297	18.6051	16.6428	17.7548	24.6977	28.3546	27.0192	27.1411	-0.12	-0.23	0.04	-0.06	-0.26	-0.21	0.01	0.21	0.45	0.696043	0.443195	0.886823	0.837753	0.389497	0.49107	0.984087	0.476403	0.127427	1	1	1	1	1	1	1	1	0.52658
ENSG00000033050.9	ABCF2	0	12	10.3676	9.87936	11.1323	11.0103	11.7618	11.248	9.85736	12.3992	28.3627	28.278	27.4931	22.358	0.09	0.22	0.34	-0.03	-0.26	0.01	-0.19	0.04	0.02	0.821181	0.605731	0.419239	0.94461	0.542789	0.988162	0.656408	0.928921	0.954276	1	1	1	1	1	1	1	1	0.994608
ENSG00000285292.1	ABCF2-H2BE1	0	12	8.94355	6.14898	6.91509	6.92776	7.84464	6.95071	6.98342	6.66239	17.9102	18.6176	17.6159	15.3347	-0.41	-0.26	-0.12	-0.15	-0.17	-0.27	-0.15	0.06	0.14	0.403432	0.59607	0.8051	0.764402	0.724688	0.584391	0.760952	0.899163	0.779557	1	1	1	1	1	1	1	1	0.961306
ENSG00000161204.11	ABCF3	0	12	9.8195	8.25059	8.05095	8.66774	13.1922	14.86	14.2373	17.5323	14.269	15.7919	16.2414	14.4479	-0.07	-0.17	0.07	0.2	0.11	0.36	-0.03	0.29	0.28	0.715328	0.396301	0.723056	0.320513	0.586088	0.0717784	0.864216	0.150903	0.163893	1	1	1	1	1	1	1	1	0.592221
ENSG00000144827.9	ABHD10	0	12	26.9205	23.9891	32.3111	33.7826	13.281	15.2358	14.5159	18.967	14.274	12.9267	12.1456	6.76823	0.02	0.38	0.58	0.2	0.11	0.45	-0.3	-0.17	-0.8	0.939434	0.12957	0.022044	0.430071	0.657031	0.0812988	0.233652	0.493949	0.00181507	1	1	0.42943	1	1	1	1	1	0.0577262
ENSG00000106077.18	ABHD11	0	12	10.6486	9.02283	8.20816	6.86911	5.18233	5.4644	5.03246	5.37058	11.2436	12.3284	11.6165	11.7678	-0.05	-0.26	-0.39	0.11	-0.06	0.02	-0.07	0.1	0.34	0.824142	0.26543	0.0959879	0.634265	0.811771	0.947484	0.770217	0.648975	0.139646	1	1	0.761792	1	1	1	1	1	0.552728
ENSG00000100997.20	ABHD12	0	12	13.9524	12.1121	14.352	12.8096	18.721	23.531	21.1813	29.9071	20.9529	22.2848	18.7325	18.0829	-0.02	0.16	0.12	0.35	0.17	0.6	-0.1	-0.1	0.07	0.924264	0.463798	0.571469	0.11346	0.433689	0.0065176	0.660676	0.647948	0.734831	1	1	1	1	1	0.502466	1	1	0.955453
ENSG00000248487.9	ABHD14A	0	12	2.3909	2.56817	3.63556	3.7787	4.99295	5.84154	5.44087	6.83346	8.68102	9.39147	9.11689	7.49459	0.28	0.73	0.91	0.25	0.11	0.42	-0.08	0.15	0.14	0.485961	0.0700514	0.0223752	0.522571	0.772697	0.301318	0.832519	0.694429	0.714853	1	1	0.431443	1	1	1	1	1	0.949395
ENSG00000114779.19	ABHD14B	0	12	35.2932	35.031	47.8427	52.5981	28.5345	29.3996	24.9976	30.3809	35.08	40.6681	38.8281	33.4791	0.19	0.56	0.83	0.07	-0.18	0.04	0.04	0.25	0.16	0.613299	0.144245	0.0318689	0.847269	0.633037	0.920036	0.915866	0.517447	0.677223	1	1	0.513607	1	1	1	1	1	0.9394
ENSG00000168792.5	ABHD15	0	12	1.50606	1.45819	2.25858	2.64541	2.17815	2.75752	2.70837	3.64064	2.76383	3.09825	4.5978	3.17309	0.02	0.69	1.07	0.36	0.3	0.69	0.02	0.85	0.41	0.976428	0.414152	0.201727	0.66844	0.724981	0.41452	0.978563	0.312053	0.623753	1	1	0.906319	1	1	1	1	1	0.926444
ENSG00000204427.12	ABHD16A	0	12	7.10939	5.77206	6.50411	6.72128	5.1555	5.43235	5.53419	5.9979	13.3258	15.058	12.9262	9.7483	-0.16	-0.01	0.17	0.09	0.09	0.14	0	0.05	-0.11	0.651342	0.967875	0.623979	0.80317	0.79404	0.701738	0.992328	0.881179	0.742906	1	1	1	1	1	1	1	1	0.957453
ENSG00000129968.17	ABHD17A	0	12	9.86871	8.70222	9.75277	11.9252	20.2748	19.3183	18.3763	25.1758	12.8404	12.3219	16.5044	17.9189	-0.02	0.1	0.53	-0.04	-0.14	0.25	-0.23	0.46	0.72	0.944363	0.710227	0.0482728	0.882319	0.604769	0.34373	0.386891	0.0822465	0.00698046	1	1	0.605838	1	1	1	1	0.900368	0.117412
ENSG00000107362.14	ABHD17B	0	12	13.4099	14.7436	12.4671	13.6181	7.2125	7.7189	7.27763	8.51462	12.3426	11.2206	12.0931	8.03136	0.33	0.02	0.27	0.12	0.01	0.18	-0.29	0.03	-0.38	0.201007	0.948383	0.293621	0.651346	0.976255	0.506089	0.260894	0.89939	0.145428	1	1	0.982981	1	1	1	1	1	0.561278
ENSG00000136379.12	ABHD17C	0	12	20.7429	35.3691	39.5661	39.4558	19.2414	20.2647	20.485	21.6891	4.20852	4.88268	4.78586	2.97337	0.88	1.04	1.19	0.11	0.1	0.11	0.02	0.23	-0.11	0.271636	0.193633	0.134928	0.888929	0.905165	0.886339	0.979485	0.769255	0.88698	1	1	0.832413	1	1	1	1	1	0.984492
ENSG00000164074.15	ABHD18	0	12	3.59399	2.85106	3.68143	3.24048	3.69066	3.22747	3.22336	3.33224	3.97388	3.83268	2.9996	2.26727	-0.15	0.15	0.09	-0.17	-0.2	-0.2	-0.2	-0.36	-0.58	0.623506	0.624744	0.764685	0.578454	0.513002	0.52695	0.517733	0.254308	0.0638753	1	1	1	1	1	1	1	1	0.378429
ENSG00000140526.18	ABHD2	0	12	19.9317	23.1678	16.9565	17.3555	23.4043	30.4423	32.3382	35.9276	7.19801	8.4309	5.73199	6.06581	0.4	-0.12	0.05	0.39	0.45	0.55	0.05	-0.3	0.08	0.280998	0.750475	0.894823	0.287679	0.221351	0.138513	0.899564	0.426853	0.826532	1	1	1	1	1	1	1	1	0.970947
ENSG00000158201.10	ABHD3	0	12	6.59715	7.02242	6.17532	4.15672	3.03278	3.60116	2.99551	3.36669	7.46026	8.17315	7.06171	5.77023	0.3	0.03	-0.41	0.28	-0.03	0.13	-0.05	-0.02	-0.07	0.407628	0.931237	0.255682	0.441845	0.936051	0.731049	0.879278	0.951686	0.846653	1	1	0.962325	1	1	1	1	1	0.975007
ENSG00000100439.10	ABHD4	0	12	2.94514	2.18586	3.01907	2.75345	2.93801	3.29902	3.32062	3.8608	16.6422	16.7149	13.2602	9.29108	-0.17	0.17	0.14	0.19	0.16	0.35	-0.16	-0.24	-0.54	0.813755	0.81583	0.842603	0.788131	0.823215	0.628214	0.822087	0.73872	0.455109	1	1	1	1	1	1	1	1	0.864048
ENSG00000011198.10	ABHD5	0	12	14.4801	13.2924	12.0524	9.99856	10.8628	10.9728	11.3185	11.622	8.9096	8.56013	8.7581	5.36519	0.12	-0.13	-0.29	0.04	0.05	0.04	-0.24	0.05	-0.35	0.868728	0.85162	0.686171	0.953503	0.940769	0.950761	0.739069	0.940245	0.628466	1	1	1	1	1	1	1	1	0.92781
ENSG00000163686.15	ABHD6	0	12	4.35326	4.1845	5.87379	6.15717	4.21536	4.50861	4.43676	4.40073	3.18411	3.81836	4.1432	3.77999	0.1	0.55	0.75	0.12	0.07	0.04	0.08	0.47	0.46	0.772343	0.102513	0.0249118	0.717558	0.833042	0.916691	0.805997	0.162751	0.172779	1	1	0.455934	1	1	1	1	1	0.603413
ENSG00000136754.18	ABI1	0	12	14.1095	12.0735	11.3531	10.2243	12.4127	12.4895	11.8993	12.7421	13.3948	13.7288	12.5995	8.28955	-0.01	-0.19	-0.22	0.03	-0.07	-0.02	-0.13	-0.02	-0.46	0.988287	0.641952	0.590509	0.94254	0.864927	0.951149	0.753441	0.964331	0.255085	1	1	1	1	1	1	1	1	0.70741
ENSG00000138443.17	ABI2	0	12	28.753	24.1	18.2996	16.8603	11.052	10.1686	10.6871	9.70203	48.7745	52.5475	39.8647	38.568	-0.05	-0.53	-0.53	-0.1	-0.06	-0.26	-0.07	-0.21	-0.05	0.836422	0.0389684	0.0408521	0.700826	0.830675	0.326491	0.776899	0.417241	0.848817	1	1	0.568326	1	1	1	1	1	0.975012
ENSG00000119328.12	ABITRAM	0	12	13.1759	10.484	13.0413	11.2574	7.35442	7.44076	6.47287	7.63392	8.47869	6.33675	5.49543	3.4242	-0.14	0.1	0.02	0.05	-0.19	0	-0.58	-0.55	-0.98	0.661091	0.747023	0.95947	0.882257	0.561847	0.988499	0.0747345	0.0910377	0.00247507	1	1	1	1	1	1	1	0.929929	0.0672284
ENSG00000097007.19	ABL1	0	12	13.2858	10.3329	11.6428	10.5338	14.0227	13.2781	12.7637	14.0615	22.7723	23.2185	16.6309	13.8059	-0.19	-0.07	-0.08	-0.05	-0.13	-0.06	-0.13	-0.4	-0.48	0.447061	0.771116	0.735	0.84838	0.585597	0.801703	0.585421	0.105898	0.0545433	1	1	1	1	1	1	1	0.977428	0.34989
ENSG00000143322.21	ABL2	0	12	62.6733	55.8324	50.96	51.5357	27.7142	26.3774	29.1316	25.7513	4.59101	5.47325	4.75664	4.42002	0.12	-0.16	-0.06	-0.05	0.04	-0.15	0.08	0.13	0.26	0.910238	0.874265	0.956731	0.959897	0.972374	0.881622	0.941671	0.899143	0.797644	1	1	1	1	1	1	1	1	0.966473
ENSG00000159842.15	ABR	0	12	24.1359	18.7333	19.2479	17.6378	19.8203	18.3952	17.3815	16.6231	6.59427	7.6217	7.36466	6.91406	-0.21	-0.21	-0.2	-0.08	-0.19	-0.31	0.02	0.25	0.35	0.444183	0.429192	0.459884	0.761079	0.476958	0.256435	0.945587	0.358093	0.190546	1	1	1	1	1	1	1	1	0.6311
ENSG00000146386.8	ABRACL	0	12	19.1039	17.3747	23.0859	20.7387	16.3333	18.6869	16.3181	19.6813	19.0747	22.2573	31.7403	18.0056	0.07	0.4	0.36	0.22	-0.01	0.21	0.03	0.83	0.3	0.894273	0.479091	0.517734	0.693817	0.980943	0.713478	0.954078	0.141318	0.598654	1	1	1	1	1	1	1	1	0.920702
ENSG00000163322.14	ABRAXAS1	0	12	7.96985	7.10034	9.02355	9.92635	15.4634	14.3552	13.7991	15.4121	22.6021	23.8917	28.8839	18.9402	0	0.3	0.56	-0.08	-0.16	-0.06	-0.07	0.45	-0.06	0.995106	0.426271	0.131581	0.833488	0.662899	0.865693	0.858243	0.223168	0.878632	1	1	0.828948	1	1	1	1	1	0.982463
ENSG00000165660.8	ABRAXAS2	0	12	8.55621	6.65001	8.87755	8.8028	7.53751	7.17608	6.53227	7.80579	12.3026	10.7683	9.50836	7.33882	-0.24	0.17	0.29	-0.04	-0.21	-0.02	-0.36	-0.32	-0.49	0.460048	0.606355	0.37536	0.890628	0.516728	0.960023	0.259629	0.321007	0.125546	1	1	1	1	1	1	1	1	0.52226
ENSG00000146109.5	ABT1	0	12	6.96267	5.7523	6.00634	6.45404	6.92071	6.17677	5.81995	6.0481	11.2289	11.4065	12.4161	10.0425	-0.08	-0.09	0.14	-0.14	-0.26	-0.23	-0.16	0.23	0.15	0.765579	0.745343	0.606047	0.611344	0.354368	0.416218	0.570086	0.41177	0.590336	1	1	1	1	1	1	1	1	0.917475
ENSG00000286072.1	AC002072.1	0	12	3.75918	3.97264	4.05506	2.97792	3.06179	2.89339	4.86483	3.33627	4.63842	5.57653	3.58602	4.44203	0.23	0.23	-0.09	-0.05	0.63	0.03	0.1	-0.31	0.23	0.439215	0.44175	0.769128	0.852775	0.030722	0.933422	0.721382	0.293245	0.438401	1	1	1	1	1	1	1	1	0.853547
ENSG00000241764.4	AC002467.1	0	12	2.00518	1.65393	1.5464	2.19193	1.6059	1.62928	1.60533	2.23956	1.30423	1.33248	1.71308	1.24255	-0.07	-0.25	0.38	0.03	0.01	0.35	-0.13	0.5	0.33	0.900823	0.660722	0.498878	0.963501	0.987582	0.555917	0.820602	0.3802	0.569203	1	1	1	1	1	1	1	1	0.911777
ENSG00000212663.2	AC003035.1	0	12	4.70473	4.63213	4.07271	2.81183	3.99367	2.95756	3.83466	2.04221	3.18875	4.66664	2.72	2.93173	0.14	-0.09	-0.49	-0.39	-0.08	-0.82	0.41	-0.13	0.18	0.64979	0.777258	0.118962	0.212596	0.785328	0.0247401	0.193419	0.685148	0.568776	1	1	0.804714	1	1	0.910108	1	1	NA
ENSG00000228113.7	AC003991.1	0	12	5.26891	7.35969	2.07406	1.35698	2.68147	3.02788	2.37443	3.55247	7.59328	16.9686	4.33505	5.45116	0.6	-1.22	-1.71	0.26	-0.15	0.33	0.91	-0.79	-0.05	0.614295	0.306666	0.150074	0.827454	0.90203	0.77999	0.444207	0.508922	0.966033	1	1	0.853688	1	1	1	1	1	0.9958
ENSG00000230612.3	AC004039.1	0	12	1.97098	2.05969	1.99192	1.39136	1.2529	1.31703	1.47701	1.5003	2.70228	3.35839	2.09533	1.63597	0.19	0.13	-0.25	0.1	0.2	0.13	0.15	-0.26	-0.41	0.644312	0.755744	0.548382	0.814502	0.633356	0.772701	0.717265	0.537561	0.318034	1	1	1	1	1	1	1	1	0.766875
ENSG00000250132.6	AC004803.1	0	12	1.85626	1.99829	2.86788	2.99586	3.3668	4.21542	2.99338	5.02413	2.83263	3.23989	3.39784	1.65103	0.21	0.74	0.95	0.37	-0.18	0.48	0.06	0.37	-0.61	0.786996	0.333633	0.211076	0.628002	0.809911	0.528798	0.933011	0.623341	0.424783	1	1	0.919908	1	1	1	1	1	0.847375
ENSG00000244560.7	AC004890.2	0	12	2.85003	2.9648	3.8526	3.68364	7.5579	7.08057	7.70509	7.25057	1.05835	1.76674	2.07062	1.81521	0.18	0.55	0.62	-0.07	0.02	-0.11	0.61	1.06	0.87	0.830788	0.523227	0.46934	0.935998	0.977404	0.89755	0.477675	0.215717	0.308272	1	1	1	1	1	1	1	1	0.756159
ENSG00000272812.1	AC004908.2	0	12	2.81883	2.99995	1.05462	1.14741	1.27889	1.37988	1.1795	1.40539	1.95138	2.39332	3.14142	1.3139	0.35	-1.28	-1.05	0.15	-0.12	0.07	0.17	0.8	-0.22	0.625806	0.0788882	0.150046	0.831524	0.8642	0.929806	0.81852	0.267534	0.760925	1	1	0.853688	1	1	1	1	1	NA
ENSG00000270157.1	AC004918.3	0	12	2.19927	1.9306	2.39459	1.86282	2.84218	2.36679	2.72245	2.68166	2.95589	3.05967	3.02117	1.58716	-0.03	0.24	0.01	-0.24	-0.07	-0.17	-0.16	0.11	-0.38	0.982152	0.851171	0.996039	0.851139	0.957697	0.895911	0.902509	0.93037	0.769359	1	1	1	1	1	1	1	1	0.960554
ENSG00000228434.1	AC004951.1	0	12	2.32372	2.18134	2.63853	2.04782	2.30613	2.12385	3.00686	2.21208	2.02966	3.89475	2.29288	3.88677	0.01	0.29	0.07	-0.1	0.34	-0.14	0.76	0.3	1.35	0.988928	0.676659	0.918623	0.888115	0.624275	0.846066	0.282641	0.672683	0.0540571	1	1	1	1	1	1	1	1	0.348252
ENSG00000285725.1	AC004967.2	0	12	3.3758	2.75114	4.00909	3.38735	1.78851	1.4497	1.99786	2.05293	7.47246	8.00405	5.92998	4.66121	-0.13	0.36	0.25	-0.28	0.15	0.09	-0.07	-0.25	-0.33	0.725872	0.332139	0.502187	0.462816	0.701087	0.829006	0.857658	0.51026	0.376314	1	1	1	1	1	1	1	1	0.815625
ENSG00000205485.13	AC004980.1	0	12	6.52692	6.07135	5.51106	5.0784	3.80374	2.97736	3.62836	2.747	4.14345	4.67093	3.70196	3.74757	0.02	-0.14	-0.11	-0.32	-0.09	-0.57	0.05	-0.03	0.2	0.975205	0.817422	0.851725	0.592718	0.873073	0.339703	0.934547	0.964577	0.728411	1	1	1	1	1	1	1	1	0.95354
ENSG00000183308.6	AC005037.1	0	12	4.06351	3.98011	3.31899	2.82424	3.32791	2.88632	3.55747	2.7884	3.406	4.61338	3.61517	2.94645	0.13	-0.17	-0.28	-0.16	0.08	-0.16	0.28	0.19	0.08	0.656055	0.558201	0.345994	0.575724	0.791621	0.617939	0.335414	0.519138	0.774515	1	1	1	1	1	1	1	1	0.960776
ENSG00000280004.1	AC005086.4	0	12	5.81087	6.40758	5.32064	4.41987	4.61165	3.4464	5.84115	2.58465	6.37612	7.9512	4.48476	6.05429	0.33	0	-0.14	-0.41	0.3	-0.81	0.14	-0.47	0.18	0.355854	0.995694	0.707779	0.270446	0.394351	0.0814827	0.6841	0.192632	0.603467	1	1	1	1	1	1	1	1	NA
ENSG00000286209.1	AC005252.4	0	12	2.02234	2.02984	1.6472	1.09972	1.48528	1.31448	1.93354	1.5479	1.85239	2.67967	1.55872	1.53065	0.17	-0.17	-0.63	-0.14	0.35	-0.07	0.37	-0.14	0.04	0.645774	0.65785	0.102311	0.707195	0.346908	0.862887	0.326113	0.712157	0.926215	1	1	0.775145	1	1	1	1	1	NA
ENSG00000268205.1	AC005261.1	0	12	13.173	11.5901	12.3232	9.35502	10.6619	9.29872	9.46794	9.2724	10.2927	11.0347	9.38561	7.08514	-0.06	0.02	-0.24	-0.17	-0.19	-0.26	-0.04	-0.04	-0.32	0.889875	0.968505	0.540442	0.6768	0.637843	0.512069	0.916533	0.915228	0.425444	1	1	1	1	1	1	1	1	0.847398
ENSG00000274561.1	AC005332.3	0	12	4.2754	3.46973	3.70218	3.20218	3.96711	4.41354	4.74068	3.43882	3.12132	4.37606	3.76517	2.86114	-0.13	-0.09	-0.17	0.19	0.25	-0.22	0.34	0.33	0.07	0.73545	0.819238	0.664192	0.627544	0.531019	0.607528	0.400395	0.406303	0.863064	1	1	1	1	1	1	1	1	NA
ENSG00000274712.2	AC005332.4	0	12	2.19947	2.48733	1.52802	1.30206	1.8732	2.03004	1.85883	1.86696	2.5762	3.69076	3.04667	2.36521	0.42	-0.4	-0.51	0.15	-0.02	-0.07	0.33	0.33	0.22	0.484406	0.50753	0.39527	0.799957	0.974684	0.905662	0.579134	0.584343	0.707631	1	1	1	1	1	1	1	1	0.947614
ENSG00000278730.1	AC005332.6	0	12	5.85933	4.2178	4.94135	4.27153	5.39597	5.6198	5.73744	6.09373	7.57439	8.33294	9.13876	6.95973	-0.31	-0.13	-0.22	0.08	0.08	0.12	-0.03	0.36	0.1	0.329405	0.681366	0.490753	0.800691	0.804913	0.712905	0.934167	0.252679	0.749213	1	1	1	1	1	1	1	1	0.958
ENSG00000214719.13	AC005562.1	0	12	5.68982	3.86462	4.34982	4.23697	4.23345	4.46056	4.36564	4.14883	10.673	10.5265	7.57675	5.38068	-0.4	-0.27	-0.18	0.1	0.02	-0.02	-0.18	-0.43	-0.72	0.116288	0.284859	0.475518	0.688148	0.929781	0.927977	0.48249	0.0900576	0.00478823	1	1	1	1	1	1	1	0.92635	0.097281
ENSG00000262879.6	AC005670.3	0	12	8.89528	8.27163	9.88564	9.01902	7.11748	7.74603	7.70897	8.24047	7.46896	8.84071	8.72546	7.635	0.06	0.27	0.27	0.14	0.1	0.15	0.09	0.35	0.3	0.775291	0.21597	0.213526	0.516361	0.647509	0.508057	0.683862	0.108399	0.166278	1	1	0.922517	1	1	1	1	0.982887	0.594125
ENSG00000258472.9	AC005726.1	0	12	1.80539	2.03567	1.43283	1.16034	1.55891	1.52793	1.46483	2.04298	3.97204	3.05727	3.12501	2.80225	0.32	-0.21	-0.38	0.03	-0.08	0.33	-0.54	-0.26	-0.2	0.422003	0.604631	0.346322	0.932899	0.834217	0.417911	0.17527	0.505446	0.618645	1	1	1	1	1	1	1	1	0.925917
ENSG00000266933.2	AC005775.1	0	12	1.76316	1.82751	1.64999	1.20313	1.19252	1.11005	1.38275	1.22477	1.57171	2.62183	1.55962	1.52438	0.22	0.03	-0.3	-0.07	0.19	-0.2	0.59	0.09	0.27	0.431192	0.920223	0.29732	0.804321	0.511622	0.572757	0.0367039	0.756736	0.354924	1	1	0.984486	1	1	1	1	1	NA
ENSG00000280202.1	AC005831.1	0	12	4.12042	3.96188	4.39257	3.98091	3.85211	2.88644	2.94251	2.22132	1.12737	1.39418	1.21453	1.03987	0.08	0.21	0.2	-0.4	-0.41	-0.78	0.18	0.23	0.16	0.843781	0.597333	0.603246	0.312453	0.298029	0.0598752	0.662502	0.577371	0.700836	1	1	1	1	1	1	1	1	0.945592
ENSG00000266538.1	AC005838.2	0	12	1.58938	1.39594	1.48817	1.24397	1.16414	1.04251	1.57814	1.9674	2.57585	4.48685	1.97621	3.20769	-0.04	0.02	-0.11	-0.14	0.43	0.5	0.69	-0.26	0.48	0.954207	0.978111	0.878906	0.84817	0.543371	0.504691	0.310521	0.706112	0.484997	1	1	1	1	1	1	1	1	NA
ENSG00000278963.1	AC005921.3	0	12	4.80391	4.59924	2.88257	1.99693	2.16593	2.09288	2.49969	1.85232	3.68971	4.33066	2.94661	2.45307	0.17	-0.61	-1.02	0.03	0.18	-0.2	0.05	-0.28	-0.27	0.798332	0.370839	0.133233	0.969349	0.796656	0.771718	0.94244	0.68389	0.691289	1	1	0.830981	1	1	1	1	1	0.943708
ENSG00000267059.2	AC005943.1	0	12	2.63963	1.76945	1.57101	2.93548	6.63784	4.96101	4.34571	7.59609	5.31121	3.74834	4.77097	7.28744	-0.49	-0.65	0.41	-0.37	-0.58	0.15	-0.66	-0.06	0.65	0.563989	0.448481	0.629949	0.660743	0.495505	0.863856	0.438265	0.944509	0.445171	1	1	1	1	1	1	1	1	0.856538
ENSG00000267205.1	AC005954.2	0	12	1.70056	1.51517	1.27116	1.11373	1.1136	1.06861	1.1558	1.32115	1.26706	1.8831	1.23969	1.37464	0	-0.3	-0.36	-0.03	0.01	-0.05	0.39	0.08	0.4	0.997976	0.339368	0.257554	0.935345	0.974724	0.899377	0.222493	0.802148	0.2141	1	1	0.963568	1	1	1	1	1	NA
ENSG00000229180.7	AC006001.3	0	12	12.46	10.8467	8.39361	9.18498	6.02079	6.12705	7.07863	6.11007	8.10668	8.76418	7.72898	6.93607	0.03	-0.44	-0.2	0.05	0.21	-0.04	-0.05	0.01	0.06	0.942404	0.341186	0.669573	0.910966	0.645265	0.937474	0.917504	0.985377	0.891193	1	1	1	1	1	1	1	1	0.984666
ENSG00000280571.2	AC006059.2	0	12	2.44725	2.16483	1.77658	1.89133	1.77825	1.33046	1.57734	1.41268	4.74247	5.12539	4.00113	6.36055	0	-0.35	-0.13	-0.39	-0.16	-0.45	-0.1	-0.2	0.72	0.995458	0.358409	0.736027	0.304793	0.670412	0.287137	0.779121	0.579402	0.0470178	1	1	1	1	1	1	1	1	0.325135
ENSG00000269968.1	AC006064.4	0	12	2.63969	3.64984	2.80926	3.36887	1.62601	2.58912	1.38555	2.10271	3.02675	1.63838	2.18636	3.21138	0.71	0.22	0.63	0.74	-0.18	0.21	-1.08	-0.36	0.41	0.313885	0.7552	0.378444	0.29873	0.798319	0.783812	0.133976	0.617175	0.565404	1	1	1	1	1	1	1	1	NA
ENSG00000263345.1	AC006435.2	0	12	8.87083	8.53953	8.14915	4.92461	5.66481	4.5611	5.62132	5.3103	6.61837	9.6874	6.15483	7.12383	0.13	0.01	-0.59	-0.29	-0.05	-0.23	0.38	-0.04	0.4	0.642048	0.983476	0.0308368	0.294313	0.863319	0.452388	0.164092	0.898249	0.141335	1	1	0.506018	1	1	1	1	1	0.555862
ENSG00000273448.1	AC006480.2	0	12	1.93694	1.76596	1.95063	1.77869	1.62212	1.46448	1.93089	1.06336	1.72708	3.2636	2.60524	2.24041	-0.02	0.12	0.12	-0.11	0.23	-0.58	0.77	0.68	0.52	0.97358	0.859794	0.854988	0.870452	0.734296	0.410869	0.254122	0.318206	0.440798	1	1	1	1	1	1	1	1	0.854446
ENSG00000267575.7	AC006504.5	0	12	6.84987	6.05699	7.36511	7.05484	7.39486	6.78524	6.29352	7.54841	6.0394	6.45821	6.02678	4.83242	-0.01	0.22	0.29	-0.1	-0.23	-0.03	-0.06	0.09	-0.02	0.960829	0.1777	0.0749529	0.52653	0.155302	0.862951	0.718161	0.585107	0.907784	1	1	0.710071	1	1	1	1	1	0.98784
ENSG00000279352.1	AC006557.6	0	12	18.4707	19.0333	18.7604	14.7849	11.7141	10.6864	13.8256	11.2665	13.1623	18.3897	13.6971	15.1015	0.21	0.14	-0.08	-0.09	0.21	-0.15	0.31	0.15	0.48	0.311064	0.504354	0.718488	0.659306	0.313039	0.517082	0.13843	0.480379	0.0226327	1	1	1	1	1	1	1	1	0.224662
ENSG00000284959.2	AC007262.2	0	12	3.07851	3.55409	3.1413	2.4959	2.3221	2.07705	2.66108	2.17787	3.07745	4.12896	2.47958	2.29011	0.33	0.14	-0.05	-0.13	0.17	-0.18	0.26	-0.22	-0.13	0.403265	0.713708	0.903646	0.731975	0.671989	0.652356	0.50684	0.569429	0.734839	1	1	1	1	1	1	1	1	0.955453
ENSG00000261804.2	AC007342.4	0	12	1.71097	1.84773	1.91786	1.32895	1.91601	2.08863	2.91124	2.10217	2.04165	2.55956	1.69128	1.71342	0.24	0.28	-0.11	0.16	0.57	0.09	0.15	-0.25	0.04	0.650034	0.599045	0.827714	0.764647	0.272665	0.865259	0.770529	0.63444	0.945062	1	1	1	1	1	1	1	1	0.994541
ENSG00000227946.1	AC007383.1	0	12	2.8312	2.74876	2.05908	2.41879	2.24252	2.23544	1.98234	1.99828	1.74587	1.8257	2.06205	1.55104	0.13	-0.35	0.02	0.03	-0.14	-0.25	-0.09	0.33	0.02	0.821751	0.537114	0.966408	0.957999	0.797318	0.672013	0.874341	0.562227	0.976595	1	1	1	1	1	1	1	1	NA
ENSG00000286739.1	AC007387.1	0	12	4.32627	4.61111	4.86896	3.36095	3.31515	3.16832	4.17274	3.05668	4.16146	5.47655	3.04572	3.85086	0.24	0.29	-0.11	-0.03	0.3	-0.16	0.21	-0.39	0.18	0.45001	0.359696	0.720288	0.911475	0.334499	0.622347	0.508968	0.216225	0.56026	1	1	1	1	1	1	1	1	0.909313
ENSG00000277948.1	AC007435.1	0	12	1.87159	1.69699	1.94141	1.09399	3.32903	1.80044	3.08866	1.25772	3.33453	5.39742	3.98773	4.22383	0.03	0.17	-0.47	-0.78	-0.07	-0.69	0.49	0.36	0.62	0.972347	0.820089	0.550632	0.285157	0.915775	0.412143	0.486417	0.608674	0.383554	1	1	1	1	1	1	1	NA	NA
ENSG00000242539.2	AC007620.2	0	12	2.62235	2.75455	2.52287	2.07695	2.07559	1.80806	2.62774	2.05434	2.08527	2.67521	1.8563	1.93565	0.24	0.07	-0.08	-0.19	0.31	0.07	0.19	-0.09	0.15	0.337493	0.781659	0.748775	0.460008	0.210645	0.810307	0.44798	0.734341	0.560686	1	1	1	1	1	1	1	1	0.909313
ENSG00000252473.1	AC007684.1	0	12	3.35968	1.58507	2.13696	1.74393	5.74399	6.77923	4.26241	1.16304	3.48313	6.14895	5.59006	2.46372	-0.91	-0.52	-0.68	0.29	-0.5	-1.52	0.6	0.63	-0.26	0.364878	0.59773	0.495537	0.747249	0.583384	0.182526	0.513157	0.493961	0.790381	1	1	NA	1	1	1	1	NA	NA
ENSG00000233251.8	AC007743.1	0	12	10.227	11.0355	11.0489	7.27982	7.55358	7.10291	9.78173	6.38478	10.2059	12.694	7.57965	7.53756	0.24	0.23	-0.24	-0.06	0.33	-0.31	0.16	-0.36	-0.12	0.577153	0.593569	0.572272	0.883431	0.430518	0.468571	0.707551	0.389478	0.775225	1	1	1	1	1	1	1	1	0.960776
ENSG00000281195.1	AC007878.1	0	12	3.01151	2.53852	3.34921	2.32295	1.77212	1.99324	2.3983	2.08079	2.91599	4.10868	3.06013	2.85559	-0.12	0.27	-0.13	0.19	0.4	0.08	0.33	0.16	0.19	0.77295	0.525729	0.762381	0.648996	0.350026	0.851745	0.429612	0.697368	0.651297	1	1	1	1	1	1	1	1	0.933184
ENSG00000283175.1	AC007920.2	0	12	1.43358	1.44175	1.41566	1.09886	1.16808	1.00554	1.29038	1.09117	1.47356	1.84177	1.39824	1.17631	0.17	0.1	-0.13	-0.2	0.11	-0.13	0.15	0.02	-0.07	0.55958	0.736163	0.647523	0.503379	0.71238	0.696455	0.593035	0.934128	0.809312	1	1	1	1	1	1	1	1	0.968899
ENSG00000277534.1	AC007996.1	0	12	1.12277	1.03138	1.04616	1.01502	1.5776	1.97995	1.81116	1.969	1.81156	1.8916	2.81722	1.86202	0.04	0.02	0.11	0.34	0.18	0.25	-0.1	0.74	0.3	0.900606	0.954168	0.697594	0.219338	0.524104	0.384867	0.709903	0.0074198	0.274128	1	1	1	1	1	1	1	0.377273	0.725523
ENSG00000275512.1	AC007998.4	0	12	4.94187	4.68654	5.0523	4.05142	4.09006	3.19913	4.12139	4.15059	4.81239	7.56446	4.21526	4.43287	0.04	0.14	-0.03	-0.33	-0.01	-0.08	0.51	-0.12	0.14	0.911374	0.71505	0.929479	0.408286	0.981827	0.847487	0.19777	0.756555	0.723127	1	1	1	1	1	1	1	1	0.951187
ENSG00000285901.2	AC008012.1	0	12	1.30464	1.61541	2.01466	1.6909	3.21774	3.1515	3.57989	3.95145	2.21167	2.28245	2.04545	1.7656	0.49	0.75	0.62	0	0.14	0.26	-0.14	-0.04	0.15	0.561156	0.372495	0.45683	0.995468	0.869414	0.756347	0.869199	0.961369	0.858784	1	1	1	1	1	1	1	1	0.977853
ENSG00000257261.6	AC008014.1	0	12	3.23374	1.92466	1.38792	1.52904	2.13757	2.61635	2.49422	2.5538	21.3374	25.9434	19.2806	22.69	-0.57	-1.11	-0.84	0.3	0.19	0.14	0.16	-0.07	0.19	0.476828	0.169033	0.298356	0.705687	0.808224	0.863307	0.837494	0.928588	0.80677	1	1	0.98471	1	1	1	1	1	0.968175
ENSG00000267121.6	AC008105.3	0	12	2.23043	2.17537	1.90454	1.69078	12.0895	10.1371	9.14386	10.5082	2.21961	3.13085	3.7865	3.31465	0.15	-0.11	-0.16	-0.21	-0.4	-0.27	0.3	0.88	0.8	0.678758	0.772068	0.672885	0.557281	0.272432	0.45839	0.413985	0.0173509	0.0308912	1	1	1	1	1	1	1	0.533832	0.261915
ENSG00000275560.1	AC008115.3	0	12	2.53461	2.99419	1.32588	1.81531	2.5508	2.55307	3.25992	2.80553	3.58973	3.03645	1.84631	1.74765	0.5	-0.8	-0.22	0.06	0.33	0.22	-0.44	-0.98	-0.75	0.532287	0.319126	0.784191	0.94444	0.677704	0.786338	0.580419	0.221522	0.347969	1	1	1	1	1	1	1	1	NA
ENSG00000268051.1	AC008395.1	0	12	5.80926	5.42818	5.15958	3.93502	4.36609	3.52507	5.0426	2.71113	5.54785	6.28623	4.45437	4.89716	0.05	-0.06	-0.32	-0.28	0.17	-0.62	0.03	-0.2	0.1	0.88124	0.865753	0.343691	0.393379	0.618471	0.0943204	0.921364	0.539147	0.763332	1	1	1	1	1	1	1	1	0.959319
ENSG00000250222.2	AC008443.4	0	12	4.27189	4.58905	5.7172	5.64189	1.59632	2.05362	1.80651	2.55985	11.7588	10.0993	9.22409	7.04682	0.36	0.55	0.65	0.37	0.18	0.59	-0.37	-0.29	-0.43	0.647061	0.483591	0.414178	0.646373	0.828068	0.486949	0.633817	0.714662	0.58313	1	1	1	1	1	1	1	1	NA
ENSG00000278895.1	AC008507.3	0	12	2.46838	2.68949	2.75004	2.20645	1.98351	1.59269	2.4035	1.9541	2.67494	3.48036	2.12018	2.45071	0.26	0.27	0.09	-0.29	0.25	-0.11	0.21	-0.26	0.17	0.430426	0.404029	0.778825	0.374777	0.433829	0.756418	0.524528	0.430855	0.590971	1	1	1	1	1	1	1	1	0.917512
ENSG00000271109.2	AC008555.4	0	12	5.8518	4.74011	5.89804	5.18304	2.93418	2.5965	3.55666	2.88767	3.95924	4.61752	3.38204	3.56954	-0.16	0.12	0.08	-0.16	0.24	-0.1	0.06	-0.13	0.18	0.64648	0.72778	0.83096	0.660106	0.511424	0.792266	0.870787	0.714189	0.62255	1	1	1	1	1	1	1	1	0.926175
ENSG00000271737.1	AC008608.2	0	12	1.91946	2.37115	1.95311	2.22051	1.97169	1.9758	2.08234	2.10451	5.12971	4.6151	5.19242	3.22388	0.49	0.15	0.48	0.06	0.08	0.35	-0.32	0.12	-0.3	0.396578	0.79581	0.412735	0.921089	0.886491	0.577384	0.567518	0.830105	0.588574	1	1	1	1	1	1	1	1	NA
ENSG00000270518.2	AC008626.1	0	12	2.07731	2.6692	2.37212	1.31108	2.43681	1.73948	2.24343	3.06936	2.34487	3.15489	1.69818	2.16316	0.53	0.32	-0.43	-0.46	-0.13	-0.35	0.23	-0.41	0.12	0.311146	0.540065	0.433276	0.372834	0.792035	0.555612	0.649853	0.444121	0.818797	1	1	1	1	1	1	1	1	NA
ENSG00000286274.1	AC008679.1	0	12	1.79097	2.07887	1.71292	1.14442	1.17579	1.18304	1.55486	1.11554	1.85733	2.16421	1.48974	1.45171	0.35	0.06	-0.4	0.04	0.38	-0.13	0.05	-0.27	-0.05	0.394728	0.892669	0.329551	0.923227	0.355523	0.754423	0.893777	0.516099	0.907431	1	1	0.995428	1	1	1	1	1	0.987762
ENSG00000249042.6	AC008771.1	0	12	2.2781	2.24913	2.48986	2.05755	2.20035	2.4206	2.35638	2.52733	1.89489	2.35283	1.82416	1.53105	0.13	0.24	0.1	0.17	0.09	0.17	0.15	0.04	-0.04	0.510863	0.233271	0.618845	0.413398	0.659961	0.420887	0.473115	0.840598	0.852921	1	1	1	1	1	1	1	1	0.976367
ENSG00000286828.1	AC008883.3	0	12	2.09287	1.96384	2.17708	1.71114	1.45121	1.27529	1.44604	1.0703	1.8511	2.53632	1.43254	1.62942	0	0.16	-0.03	-0.16	-0.02	-0.5	0.3	-0.28	0.11	0.994327	0.779068	0.954031	0.779884	0.968261	0.407447	0.607534	0.639147	0.84852	1	1	1	1	1	1	1	1	0.975007
ENSG00000267939.1	AC008946.1	0	12	14.1603	12.6427	11.0352	9.29059	9.36895	8.33578	9.31529	9.65512	11.696	14.4736	10.7865	11.2445	-0.01	-0.24	-0.37	-0.13	-0.04	-0.08	0.16	-0.02	0.25	0.969288	0.393925	0.196958	0.643199	0.891912	0.804374	0.582492	0.956481	0.384377	1	1	0.90232	1	1	1	1	1	0.820658
ENSG00000269688.1	AC008982.2	0	12	2.89659	3.34881	2.44971	1.74286	1.44725	1.75825	1.61235	1.88918	2.14132	3.43214	2.64414	2.52913	0.41	-0.12	-0.48	0.33	0.12	0.57	0.47	0.37	0.54	0.399892	0.812255	0.337905	0.508185	0.805831	0.290035	0.348516	0.459327	0.278425	1	1	1	1	1	1	1	1	NA
ENSG00000278999.1	AC008985.1	0	12	1.96584	1.86157	1.57922	1.266	1.22728	1.16813	1.36539	1.0789	1.7248	2.23889	1.4279	1.7303	0.1	-0.2	-0.38	-0.03	0.12	-0.24	0.21	-0.18	0.29	0.694301	0.453226	0.141679	0.898113	0.638757	0.411985	0.421961	0.480363	0.258942	1	1	0.842769	1	1	1	1	1	0.710382
ENSG00000274093.1	AC009032.1	0	12	2.28727	2.8807	2.1655	1.21808	1.9436	2.4861	4.37261	1.76451	4.15575	5.78618	3.25261	4.94967	0.51	0.04	-0.67	0.35	1.08	-0.2	0.35	-0.28	0.49	0.361772	0.938256	0.248765	0.533573	0.0504526	0.755776	0.525893	0.616576	0.366959	1	1	0.953832	1	1	1	1	1	NA
ENSG00000214331.8	AC009053.1	0	12	8.41369	7.3645	7.91155	6.98214	8.6003	7.76766	9.1956	7.91662	5.7793	7.74443	7.83135	7.96347	-0.02	0.03	-0.02	-0.12	0.07	-0.19	0.26	0.54	0.67	0.956431	0.929441	0.958188	0.711101	0.825516	0.569971	0.438105	0.105508	0.0429857	1	1	1	1	1	1	1	0.975835	0.311531
ENSG00000260778.5	AC009065.4	0	12	1.76546	1.31472	1.89787	1.36372	2.36397	2.05084	2.62745	2.0806	2.86405	3.14711	3.8191	3.79553	-0.28	0.21	-0.12	-0.18	0.13	-0.13	-0.03	0.52	0.62	0.543855	0.649101	0.789092	0.687473	0.774162	0.78913	0.950202	0.246663	0.169857	1	1	1	1	1	1	1	1	NA
ENSG00000259972.3	AC009120.2	0	12	4.63004	3.53966	4.48216	3.69497	4.47302	3.12369	3.87918	3.69236	2.21577	3.53772	3.36271	3.8518	-0.28	0.06	-0.08	-0.48	-0.22	-0.35	0.53	0.72	0.98	0.651131	0.917558	0.90116	0.431591	0.721348	0.569841	0.384369	0.236287	0.107572	1	1	1	1	1	1	1	1	0.488745
ENSG00000286797.1	AC009315.1	0	12	3.17839	3.01455	2.94329	2.5733	1.73907	1.43093	1.80029	1.44527	2.50438	3.08052	2.49218	1.93283	0.09	0.01	-0.05	-0.25	0.03	-0.28	0.14	0.09	-0.15	0.786588	0.986903	0.862945	0.427872	0.916184	0.409874	0.654259	0.78168	0.63552	1	1	1	1	1	1	1	1	0.928116
ENSG00000216895.9	AC009403.1	0	12	5.06419	4.76719	4.44563	3.71595	3.92123	3.50135	4.04913	4.09511	8.17342	10.311	7.17554	7.07563	0.1	-0.07	-0.2	-0.14	0.04	0.01	0.16	-0.1	0.12	0.716418	0.813679	0.481527	0.629876	0.899246	0.968985	0.572866	0.721237	0.669967	1	1	1	1	1	1	1	1	0.937575
ENSG00000258056.2	AC009779.2	0	12	2.38593	2.21546	2.7243	3.46109	1.69561	2.26445	2.05013	2.18205	2.01883	1.89618	1.78992	1.47142	0.04	0.3	0.79	0.43	0.27	0.36	-0.27	-0.08	-0.21	0.909656	0.371339	0.0197441	0.204154	0.429211	0.308293	0.436894	0.815136	0.543292	1	1	0.407415	1	1	1	1	1	0.900344
ENSG00000256646.8	AC010132.3	0	12	3.73881	3.20814	3.76859	4.47853	5.25466	4.98641	4.81663	5.31477	5.54379	5.14318	5.03864	3.01235	-0.1	0.12	0.51	-0.06	-0.11	-0.04	-0.29	-0.04	-0.5	0.86412	0.845602	0.402884	0.921603	0.8539	0.949034	0.637849	0.953702	0.407244	1	1	1	1	1	1	1	1	0.83774
ENSG00000270804.1	AC010326.4	0	12	1.19719	1.17648	1.41279	1.08545	1.13945	1.09288	1.23788	1.1423	1.43501	1.88411	1.45897	1.94219	0.15	0.37	0.11	-0.04	0.09	0.08	0.25	0.12	0.67	0.707792	0.359318	0.782097	0.929264	0.817903	0.857509	0.538828	0.757761	0.0940996	1	1	1	1	1	1	1	1	0.458314
ENSG00000285589.1	AC010422.8	0	12	2.02645	1.96045	2.03518	1.70964	1.7783	1.56531	1.62247	1.71061	1.50584	1.69805	1.61975	1.30335	0.12	0.13	0	-0.14	-0.15	-0.1	0	0.21	0.1	0.588721	0.578224	0.993157	0.536501	0.51329	0.660719	0.98381	0.365494	0.645615	1	1	1	1	1	1	1	1	0.931621
ENSG00000268750.7	AC010522.1	0	12	7.26872	6.25777	5.09877	5.32078	2.9047	3.06179	2.86541	2.7442	4.88555	5.01746	6.15333	5.0393	0.01	-0.38	-0.2	0.11	-0.04	-0.15	-0.15	0.42	0.28	0.981586	0.372939	0.649649	0.808308	0.920542	0.751035	0.735145	0.330672	0.519096	1	1	1	1	1	1	1	1	0.89117
ENSG00000269439.6	AC010618.3	0	12	6.84101	5.52198	5.62068	5.58271	2.37628	1.56613	1.55484	1.67253	1.3787	1.57429	1.65788	1.29773	-0.1	-0.16	-0.06	-0.57	-0.58	-0.7	0	0.38	0.11	0.876919	0.803304	0.919585	0.384581	0.37072	0.323449	0.994781	0.566412	0.866846	1	1	1	1	1	1	1	1	NA
ENSG00000287001.1	AC010624.5	0	12	44.6067	57.9617	20.2337	26.1406	1.81344	2.02808	2.77711	2.60389	42.8552	49.6547	20.6251	24.2248	0.65	-1.01	-0.53	0.17	0.58	0.46	0.08	-1.01	-0.73	0.511777	0.30665	0.595356	0.86621	0.559708	0.64876	0.93259	0.307667	0.462441	1	1	1	1	1	1	1	1	0.868524
ENSG00000283103.3	AC010642.2	0	12	5.76592	5.08578	5.72694	5.76483	5.93044	5.03169	5.35433	5.15789	7.14669	7.50425	7.25084	5.50125	0.02	0.11	0.25	-0.21	-0.15	-0.26	-0.11	0.09	-0.15	0.954918	0.736951	0.44955	0.522116	0.654181	0.438351	0.743248	0.790399	0.646952	1	1	1	1	1	1	1	1	0.93215
ENSG00000273184.1	AC010655.4	0	12	6.37967	4.90116	5.65165	4.66691	4.09562	3.92445	4.54152	3.51995	7.99591	7.4491	8.13303	3.16041	-0.17	-0.05	-0.21	-0.05	0.12	-0.28	-0.27	0.09	-1.01	0.708309	0.904567	0.634342	0.905782	0.788392	0.545564	0.536028	0.836761	0.0227369	1	1	1	1	1	1	1	1	0.22525
ENSG00000267520.2	AC010733.1	0	12	3.10039	3.20856	3.53007	2.73793	2.66739	2.09477	2.892	1.9865	2.9813	3.97699	2.33858	2.1245	0.15	0.3	0.08	-0.32	0.08	-0.48	0.27	-0.27	-0.21	0.80454	0.618232	0.893283	0.588347	0.887525	0.417011	0.642816	0.648021	0.719392	1	1	1	1	1	1	1	1	0.950529
ENSG00000265073.1	AC010761.2	0	12	1.71125	1.64719	1.46287	1.64468	1.43846	1.18163	1.82874	1.09222	2.30582	3.38175	2.04697	2.3641	0.1	-0.09	0.19	-0.23	0.34	-0.02	0.39	-0.1	0.37	0.846247	0.860163	0.722015	0.666916	0.507271	0.974242	0.440378	0.848551	0.472956	1	1	1	1	1	1	1	1	NA
ENSG00000247199.5	AC011346.1	0	12	10.6916	10.8485	11.244	9.15626	7.36393	6.3465	8.27946	6.53937	9.95341	13.9129	8.33703	9.03159	0.14	0.18	0.03	-0.18	0.14	-0.24	0.32	-0.17	0.12	0.710687	0.633467	0.941742	0.634395	0.718072	0.542231	0.401192	0.660856	0.765721	1	1	1	1	1	1	1	1	0.959538
ENSG00000269246.1	AC011445.1	0	12	4.55035	4.01013	1.64182	3.30309	2.67484	2.68889	2.2122	2.38017	5.69507	3.64763	7.85543	5.22502	0.1	-1.33	-0.22	0.04	-0.28	0.21	-0.76	0.56	0.28	0.939081	0.324815	0.871636	0.97555	0.8374	0.882702	0.568806	0.670653	0.834384	1	1	1	1	1	1	1	NA	NA
ENSG00000267383.7	AC011447.3	0	12	7.23641	5.69649	5.25418	3.87392	2.39195	2.45162	3.08224	3.34216	4.58196	4.8479	3.77182	3.34987	-0.22	-0.35	-0.65	0.06	0.33	0.37	-0.08	-0.19	-0.19	0.606094	0.416561	0.132529	0.899501	0.44696	0.424272	0.861223	0.66874	0.661403	1	1	0.829276	1	1	1	1	1	0.935927
ENSG00000269374.1	AC011497.2	0	12	2.7069	2.1979	2.78941	2.4974	2.63429	2.30763	2.49767	2.34498	3.50591	2.71537	3.8073	1.41132	-0.13	0.15	0.12	-0.16	-0.07	-0.1	-0.48	0.19	-1.1	0.790857	0.749983	0.803659	0.735359	0.883245	0.846735	0.313234	0.697402	0.0225209	1	1	1	1	1	1	1	1	0.224242
ENSG00000258017.2	AC011603.2	0	12	1.92655	1.87467	1.19151	1.40301	1.44523	1.39756	1.30499	2.06499	2.33478	1.6749	2.05905	1.47986	0.15	-0.57	-0.21	-0.01	-0.18	0.32	-0.64	-0.11	-0.34	0.688176	0.127616	0.581415	0.981002	0.62897	0.428299	0.086599	0.777797	0.355837	1	1	1	1	1	1	1	1	0.800276
ENSG00000261114.1	AC012181.1	0	12	4.56968	3.43625	4.02041	2.45012	3.90443	3.75736	3.55107	3.18784	6.0768	6.89045	2.61712	2.13542	-0.29	-0.07	-0.66	0.01	-0.15	-0.18	0.06	-1.18	-1.29	0.593605	0.896154	0.223213	0.988608	0.777429	0.754831	0.918417	0.0295122	0.0173995	1	1	0.933391	1	1	1	1	0.67528	0.19796
ENSG00000261270.1	AC012181.2	0	12	2.92333	2.53358	3.0105	1.57583	2.98644	2.4026	2.45482	2.39364	4.18116	4.44096	1.64468	1.67975	-0.08	0.15	-0.66	-0.25	-0.3	-0.3	-0.07	-1.32	-1.12	0.877663	0.785166	0.229237	0.643056	0.576924	0.602958	0.896154	0.0156495	0.039428	1	1	0.937812	1	1	1	1	0.509182	NA
ENSG00000267228.7	AC012254.2	0	12	5.89102	4.30104	4.11434	4.38865	3.17444	2.51681	2.50817	4.56761	4.04417	6.46991	2.82452	4.34904	-0.22	-0.39	-0.18	-0.33	-0.33	0.4	0.44	-0.41	0.38	0.768444	0.593461	0.803002	0.650854	0.650393	0.58942	0.551458	0.579961	0.603998	1	1	1	1	1	1	1	1	0.922339
ENSG00000272667.1	AC012306.2	0	12	2.07535	2.32594	2.07084	2.30068	4.14475	3.49383	3.72719	4.15597	4.32553	3.73739	4.64296	2.08767	0.31	0.1	0.38	-0.2	-0.14	-0.03	-0.37	0.21	-0.72	0.524787	0.845673	0.434001	0.672907	0.766732	0.957912	0.443726	0.661584	0.132609	1	1	1	1	1	1	1	1	NA
ENSG00000232098.3	AC012313.1	0	12	6.9905	6.75044	6.23685	8.49035	4.93307	5.25431	4.98275	5.84607	8.24643	9.15196	8.59195	8.77666	0.08	-0.05	0.54	0.12	0.01	0.2	-0.02	0.15	0.31	0.824996	0.899509	0.151208	0.744208	0.975264	0.606751	0.96636	0.696675	0.409045	1	1	0.856845	1	1	1	1	1	0.838731
ENSG00000268543.1	AC012313.4	0	12	1.42261	1.51259	1.8404	1.6856	2.38739	2.05261	2.30309	2.85716	1.20729	1.43533	1.70171	1.28202	0.19	0.47	0.49	-0.21	-0.05	0.14	0.13	0.59	0.31	0.824519	0.579722	0.560046	0.804575	0.949861	0.869126	0.878488	0.481511	0.714967	1	1	1	1	1	1	1	1	NA
ENSG00000240401.9	AC012358.2	0	12	2.32974	1.41294	2.58334	1.81637	1.66529	1.02913	1.24459	1.59054	1.33621	1.64778	1.1124	1.17924	-0.54	0.27	-0.12	-0.68	-0.45	-0.23	0.14	-0.18	0.12	0.125572	0.443383	0.728551	0.0566185	0.198702	0.578362	0.694538	0.631534	0.749148	1	1	1	1	1	1	1	1	NA
ENSG00000225889.9	AC012368.1	0	12	1.91408	1.70403	2.21235	1.73543	1.27826	1.06389	1.51233	1.07949	1.67405	3.2003	1.24465	1.44798	-0.02	0.32	0.11	-0.24	0.2	-0.33	0.76	-0.39	0.13	0.96329	0.483871	0.808186	0.604572	0.667801	0.513345	0.101453	0.403209	0.774051	1	1	1	1	1	1	1	1	0.960776
ENSG00000279348.1	AC012513.3	0	12	1.39279	1.33025	1.33193	1.15059	2.03071	2.37124	2.29387	1.84249	1.38626	1.65861	1.44166	1.16044	0.02	0.04	-0.02	0.21	0.15	-0.19	0.07	0.11	0.08	0.981083	0.959832	0.975786	0.778558	0.840439	0.802328	0.926979	0.889841	0.913285	1	1	1	1	1	1	1	1	0.988709
ENSG00000261526.2	AC012615.1	0	12	2.80957	2.77994	2.70483	2.79099	3.38074	3.47713	2.97055	3.53267	3.40756	3.46484	3.8782	3.38075	0.23	0.08	0.24	0.1	-0.18	0.09	-0.16	0.27	0.32	0.730295	0.908153	0.714709	0.874305	0.780502	0.895166	0.812673	0.685404	0.6241	1	1	1	1	1	1	1	1	0.926444
ENSG00000259802.1	AC012640.2	0	12	2.03396	2.00997	1.53943	2.37655	1.5113	1.84857	2.08966	2.11551	1.85669	1.68062	1.85901	1.68651	0.19	-0.28	0.48	0.31	0.48	0.5	-0.33	0.07	0.12	0.59353	0.435084	0.168595	0.379148	0.174016	0.190831	0.351309	0.842707	0.740497	1	1	0.876398	1	1	1	1	1	0.957033
ENSG00000279765.3	AC013394.1	0	12	2.2143	1.89993	1.76804	1.43231	1.59859	1.3273	1.40261	1.56678	1.94302	2.39138	2.13534	2.07	0	-0.2	-0.39	-0.24	-0.22	-0.13	0.12	0.23	0.31	0.992811	0.677063	0.414157	0.624161	0.650352	0.797794	0.80211	0.63737	0.519475	1	1	1	1	1	1	1	1	0.891486
ENSG00000259345.7	AC013652.1	0	12	2.77118	2.63883	2.65647	2.93808	1.7142	1.66339	1.79243	1.65678	2.35368	3.10218	1.59328	1.97488	0.07	0.05	0.33	-0.03	0.04	-0.16	0.25	-0.47	-0.03	0.857386	0.901147	0.406823	0.947888	0.929436	0.705416	0.529641	0.249094	0.931623	1	1	1	1	1	1	1	1	0.991433
ENSG00000232386.9	AC015712.1	0	12	9.50257	7.98594	7.14174	5.66419	2.0495	1.99739	2.41251	2.67237	3.32454	4.09699	2.99555	3.2217	-0.04	-0.29	-0.5	-0.01	0.2	0.15	0.13	-0.04	0.29	0.926091	0.516893	0.257703	0.990291	0.657909	0.766387	0.774964	0.921974	0.517607	1	1	0.963568	1	1	1	1	1	0.890522
ENSG00000264112.1	AC015813.1	0	12	4.83755	4.29203	5.54558	4.14693	4.81375	5.13973	5.91743	5.74646	27.9044	31.0162	24.1503	16.5234	-0.1	0.3	0.02	0.12	0.27	0.2	-0.03	-0.13	-0.38	0.901258	0.716485	0.980808	0.888837	0.746361	0.811628	0.975682	0.874527	0.644909	1	1	1	1	1	1	1	1	0.931621
ENSG00000266086.3	AC015813.2	0	12	2.54206	1.7462	3.35364	2.98283	3.34439	3.29788	4.27334	4.07931	15.5544	16.4868	15.3207	14.0077	-0.36	0.52	0.47	0.02	0.31	0.24	-0.1	0.07	0.24	0.520033	0.345418	0.39794	0.971464	0.568742	0.661252	0.85445	0.89364	0.661791	1	1	1	1	1	1	1	1	0.936025
ENSG00000278600.1	AC015871.3	0	12	2.42441	2.4295	2.15953	1.96119	1.76281	1.74605	2.08957	1.76449	2.36304	2.9366	2.18842	1.90692	0.17	-0.05	-0.06	0.02	0.21	0.04	0.17	-0.02	-0.03	0.469107	0.831323	0.787503	0.947357	0.370118	0.874056	0.482342	0.921181	0.895379	1	1	1	1	1	1	1	1	0.985424
ENSG00000274213.1	AC015912.3	0	12	18.6935	18.4937	7.29883	7.67168	5.13677	3.14784	3.32646	2.39021	7.46524	6.20201	8.89632	4.64548	0.27	-1.22	-1.05	-0.65	-0.66	-0.98	-0.46	0.35	-0.28	0.797027	0.240451	0.312051	0.536772	0.529523	0.369904	0.657748	0.740009	0.785171	1	1	0.986332	1	1	1	1	1	0.963574
ENSG00000272606.1	AC015982.2	0	12	3.05542	4.00095	2.98046	3.81802	3.09037	2.94666	2.74104	2.32618	2.03621	1.82791	2.71723	1.71761	0.6	0.1	0.59	-0.03	-0.16	-0.31	-0.33	0.51	0.04	0.165021	0.825838	0.172362	0.940052	0.71314	0.507727	0.463765	0.245476	0.931184	1	1	0.876965	1	1	1	1	1	NA
ENSG00000246089.3	AC016065.1	0	12	6.14328	8.01394	6.77619	8.02064	1.92398	2.13479	1.91417	2.38005	3.14428	3.46878	4.00355	2.47057	0.67	0.28	0.62	0.17	-0.01	0.26	-0.03	0.42	-0.05	0.506517	0.783665	0.542251	0.865659	0.994199	0.800839	0.974187	0.679564	0.959345	1	1	1	1	1	1	1	1	0.995162
ENSG00000286122.1	AC016074.2	0	12	1.86292	1.92537	1.76374	1.4035	1.4097	1.21378	1.74109	1.41241	1.79552	2.60768	1.38303	1.59761	0.16	0.03	-0.16	-0.19	0.27	-0.07	0.35	-0.28	0.13	0.69204	0.932796	0.708101	0.640517	0.513139	0.868284	0.399477	0.505869	0.750387	1	1	1	1	1	1	1	1	0.958
ENSG00000272599.2	AC016394.1	0	12	1.87903	1.70145	2.0804	1.502	2.35943	2.32781	2.81665	2.945	2.4409	3.10235	2.55163	1.84066	0.03	0.27	-0.07	0	0.23	0.25	0.17	0.13	-0.09	0.937316	0.508518	0.864606	0.997906	0.553122	0.558757	0.660541	0.746738	0.825842	1	1	1	1	1	1	1	1	NA
ENSG00000282393.1	AC016588.2	0	12	2.25503	1.95029	2.08224	1.97644	3.47351	4.41262	4.8429	4.88192	3.24958	3.85785	5.13558	4.73089	-0.03	0	0.06	0.36	0.45	0.43	0.09	0.76	0.79	0.925992	0.998111	0.858369	0.264809	0.165943	0.188178	0.776084	0.0181894	0.0150194	1	1	1	1	1	1	1	0.549349	0.181498
ENSG00000286104.1	AC016629.3	0	12	1.29712	1.29638	1.33611	1.18097	1.7972	2.04323	1.90556	2.19163	2.21066	2.42181	2.49237	2.17432	0.19	0.17	0.12	0.21	0.06	0.27	0	0.29	0.19	0.666183	0.702613	0.7907	0.622097	0.885882	0.553067	0.998141	0.496228	0.655745	1	1	1	1	1	1	1	1	0.934137
ENSG00000287306.1	AC016821.1	0	12	9.98834	12.0273	10.3845	6.07612	7.09608	7.11868	9.35431	7.0897	10.5739	13.9134	7.55791	8.74504	0.39	0.17	-0.47	0.04	0.36	-0.08	0.23	-0.43	0.03	0.368972	0.690569	0.283353	0.924656	0.403935	0.853818	0.592987	0.321408	0.947367	1	1	0.977417	1	1	1	1	1	0.994608
ENSG00000233223.3	AC016876.1	0	12	8.41393	7.6055	7.52081	11.3421	8.68926	7.57759	8.06783	7.99439	15.0481	17.9388	15.1851	15.2886	0	-0.05	0.69	-0.15	-0.11	-0.15	0.06	0.09	0.29	0.997393	0.901291	0.0680489	0.691162	0.767699	0.701345	0.864785	0.815329	0.442235	1	1	0.685909	1	1	1	1	1	0.855883
ENSG00000264772.6	AC016876.2	0	12	4.56501	4.75928	4.3223	4.12908	2.36653	2.3865	2.36579	2.64863	1.79431	2.35252	1.85576	1.84637	0.25	0.04	0.11	0.04	0.01	0.11	0.22	0.13	0.31	0.269291	0.855223	0.622995	0.861385	0.981932	0.65179	0.353767	0.58014	0.177801	1	1	1	1	1	1	1	1	0.611592
ENSG00000229625.3	AC016877.1	0	12	7.51929	8.48408	7.26476	5.12554	5.18643	4.33603	5.76482	5.13253	6.11812	8.42963	5.74264	6.41596	0.33	0.07	-0.31	-0.23	0.13	-0.14	0.29	0.01	0.39	0.303252	0.828577	0.344021	0.488225	0.684198	0.683857	0.361927	0.965951	0.22701	1	1	1	1	1	1	1	1	0.676759
ENSG00000259985.1	AC017100.1	0	12	1.54151	1.90447	1.54865	1.61039	2.54668	2.03668	1.90754	1.8745	1.13922	1.46637	1.83602	1.11161	0.38	0.11	0.33	-0.29	-0.41	-0.49	0.18	0.83	0.44	0.754191	0.929401	0.785984	0.80692	0.731843	0.685018	0.882056	0.487936	0.712294	1	1	1	1	1	1	1	1	0.948831
ENSG00000264920.2	AC018521.5	0	12	1.99354	2.87368	1.9927	2.18024	1.40659	1.93302	1.72523	3.02464	3.83693	4.63572	3.49235	2.90869	0.7	0.13	0.4	0.49	0.29	0.87	0.13	-0.01	-0.05	0.0739431	0.748868	0.311459	0.209352	0.456392	0.0383517	0.73832	0.985935	0.888943	1	1	0.986332	1	1	1	1	1	0.984492
ENSG00000230715.3	AC018638.2	0	12	3.90416	3.18642	4.32004	3.99638	5.1906	4.37901	5.59255	3.80191	2.37699	3.35879	2.33844	2.29182	-0.13	0.26	0.29	-0.21	0.11	-0.33	0.3	0.06	0.27	0.7475	0.50976	0.461671	0.594395	0.770525	0.439857	0.458479	0.877588	0.509401	1	1	1	1	1	1	1	1	NA
ENSG00000243302.3	AC018638.4	0	12	2.90117	2.31963	2.60259	2.39865	3.34571	3.23584	3.56208	3.50298	1.91089	2.4873	1.8911	2.04697	-0.16	-0.04	-0.03	-0.02	0.07	0	0.23	0.12	0.45	0.603932	0.900131	0.926318	0.949208	0.808262	0.99023	0.460037	0.706052	0.146785	1	1	1	1	1	1	1	1	0.564692
ENSG00000243679.1	AC018638.5	0	12	3.66345	2.99359	3.45444	3.12093	5.31041	4.40201	5.11518	4.58459	2.79359	3.14352	2.6377	2.19003	-0.14	0.03	0.03	-0.25	-0.08	-0.21	0.02	0.01	0.02	0.754784	0.941875	0.95493	0.577016	0.856204	0.643101	0.962298	0.986119	0.968489	1	1	1	1	1	1	1	1	0.995824
ENSG00000269707.2	AC018730.1	0	12	1.49537	1.5351	1.70592	1.1037	1.2622	1.05319	1.56705	1.0515	2.64185	4.23161	2.64255	2.56316	0.15	0.31	-0.18	-0.23	0.29	-0.34	0.5	0.06	0.34	0.82917	0.652387	0.78731	0.729465	0.671251	0.633872	0.463759	0.925547	0.611399	1	1	1	1	1	1	1	1	0.923991
ENSG00000286058.1	AC018865.2	0	12	3.55743	3.22762	3.00779	2.74756	3.4182	3.36189	4.40698	3.19496	4.72256	5.21681	3.15533	3.693	-0.04	-0.14	-0.12	0.04	0.33	-0.12	0	-0.51	-0.15	0.949432	0.845049	0.861592	0.956411	0.634767	0.867755	0.995897	0.466088	0.826669	1	1	1	1	1	1	1	1	0.970947
ENSG00000272711.1	AC019069.1	0	12	1.92619	2.12928	1.93461	2.0359	3.11794	2.26151	2.02216	2.02428	2.92447	3.2964	2.86117	2.22498	0.21	0.1	0.34	-0.45	-0.6	-0.72	0.02	0.04	-0.09	0.836714	0.920234	0.736986	0.660233	0.555778	0.484991	0.982104	0.965344	0.928753	1	1	1	1	1	1	1	1	0.991136
ENSG00000213963.6	AC019080.1	0	12	3.70328	2.88366	3.28711	2.56621	3.35744	3.2275	3.48289	4.172	2.78449	3.3505	1.89721	1.88367	-0.24	-0.07	-0.3	-0.02	0.04	0.19	0.16	-0.43	-0.31	0.601122	0.887053	0.517605	0.967762	0.938908	0.688576	0.726713	0.353635	0.509171	1	1	1	1	1	1	1	1	0.88772
ENSG00000281469.1	AC019226.1	0	12	1.23348	1.94158	2.24372	1.67602	1.74699	2.08978	3.01937	2.68479	1.60679	1.68555	1.74956	1.2688	0.83	0.98	0.69	0.28	0.73	0.44	-0.04	0.22	-0.12	0.125751	0.069539	0.207118	0.59316	0.15501	0.445666	0.943728	0.678933	0.817662	1	1	0.913197	1	1	1	1	1	NA
ENSG00000279417.1	AC019322.4	0	12	4.7604	4.83789	5.05652	4.23179	2.78998	2.76368	3.75152	2.9935	4.12009	5.29919	3.43669	4.05155	0.15	0.2	0.08	0.01	0.39	0.03	0.2	-0.17	0.25	0.665103	0.573972	0.816511	0.970963	0.268952	0.929006	0.568581	0.633017	0.474032	1	1	1	1	1	1	1	1	0.871618
ENSG00000269480.1	AC020913.2	0	12	1.9668	1.80268	1.9882	1.65046	1.80177	1.59231	1.46968	1.60898	2.06828	2.91669	1.71715	2.13868	0.04	0.14	-0.01	-0.14	-0.31	-0.26	0.32	-0.21	0.35	0.9137	0.676623	0.984676	0.680249	0.342764	0.49513	0.327804	0.530413	0.290811	1	1	1	1	1	1	1	1	NA
ENSG00000230551.4	AC021078.1	0	12	6.0479	5.24143	5.44916	3.778	3.21465	3.04041	3.53939	3.13731	3.63452	4.47051	3.29665	3.21523	-0.02	-0.03	-0.43	-0.06	0.11	-0.11	0.15	-0.06	0.05	0.9556	0.929234	0.169051	0.860027	0.719107	0.725438	0.630502	0.860687	0.88263	1	1	0.876398	1	1	1	1	1	0.983636
ENSG00000286450.1	AC021573.1	0	12	3.18814	3.18729	2.82166	2.49829	2.55011	2.39692	3.1814	3.08087	2.75027	3.77933	2.59669	2.60409	0.16	-0.06	-0.1	-0.06	0.28	0.19	0.29	0.01	0.23	0.589885	0.84081	0.727945	0.837862	0.330172	0.537565	0.319278	0.962333	0.420485	1	1	1	1	1	1	1	1	0.846191
ENSG00000206567.10	AC022007.1	0	12	3.64072	3.59039	3.31116	2.43432	2.94894	2.60589	3.12086	3.09946	3.37836	4.53062	3.11269	3.24687	0.15	-0.01	-0.33	-0.16	0.05	0.02	0.26	-0.01	0.21	0.529609	0.957879	0.169933	0.511884	0.838876	0.950553	0.27031	0.960755	0.367512	1	1	0.876398	1	1	1	1	1	0.809802
ENSG00000267284.2	AC022031.2	0	12	8.09101	7.05661	9.21752	7.49706	2.78129	2.91061	3.62659	2.68865	4.17739	5.21562	3.25059	4.39929	-0.05	0.3	0.14	0.11	0.35	-0.02	0.15	-0.29	0.36	0.890619	0.368284	0.673669	0.752759	0.319308	0.965747	0.660632	0.408845	0.290977	1	1	1	1	1	1	1	1	0.740364
ENSG00000260276.2	AC022167.2	0	12	1.36648	1.17794	2.41809	2.68781	2.51345	2.534	2.89151	3.21812	2.46266	2.90711	2.56571	2.43186	-0.03	0.95	1.22	0.04	0.17	0.33	0.09	0.17	0.22	0.94035	0.0104444	0.00096546	0.904353	0.640551	0.387694	0.816301	0.652871	0.553739	1	0.937465	0.0822927	1	1	1	1	1	0.906167
ENSG00000279088.1	AC022400.6	0	12	5.31138	3.96277	4.40964	4.24852	5.21617	5.66634	4.80607	5.62727	10.0995	10.8901	7.93327	5.7987	-0.25	-0.15	-0.07	0.16	-0.12	0.12	-0.08	-0.3	-0.49	0.427297	0.643807	0.831382	0.611632	0.712023	0.708515	0.807418	0.343279	0.115756	1	1	1	1	1	1	1	1	0.505217
ENSG00000248538.8	AC022784.1	0	12	1.39518	1.55241	1.32383	1.28422	2.05414	2.25343	2.18453	2.28946	1.29761	1.53323	1.08171	1.32191	0.3	0.04	0.13	0.17	0.07	0.21	0.06	-0.18	0.31	0.301343	0.887664	0.663677	0.548219	0.806417	0.492981	0.829402	0.539517	0.292555	1	1	1	1	1	1	1	1	0.741596
ENSG00000258677.2	AC022826.2	0	12	4.0613	3.35084	3.28079	3.40074	2.23542	1.93626	1.68779	1.72071	1.18796	1.76242	2.16685	1.16865	-0.06	-0.18	0.01	-0.17	-0.37	-0.54	0.45	0.99	0.23	0.914753	0.759437	0.989277	0.775105	0.519753	0.376004	0.442846	0.0891926	0.695846	1	1	1	1	1	1	1	0.925061	0.944603
ENSG00000274281.1	AC022929.2	0	12	10.8896	11.5671	11.0395	7.10409	7.42747	6.83767	9.31635	7.39564	11.0932	14.3526	7.7009	8.55589	0.21	0.14	-0.36	-0.09	0.3	-0.08	0.2	-0.48	-0.09	0.596453	0.736378	0.365616	0.83132	0.458785	0.845811	0.611978	0.235998	0.814748	1	1	1	1	1	1	1	1	0.969822
ENSG00000271870.1	AC024060.2	0	12	3.58693	2.88028	3.62385	2.66984	3.45971	3.20853	3.17231	2.77035	4.37127	4.75166	3.85613	3.18245	-0.19	0.13	-0.18	-0.09	-0.13	-0.35	-0.03	-0.11	-0.19	0.695886	0.790979	0.698453	0.852376	0.776398	0.49001	0.944392	0.820359	0.69266	1	1	1	1	1	1	1	1	NA
ENSG00000269044.2	AC024075.2	0	12	1.64349	1.30291	1.51248	1.3578	2.01017	1.97569	2.17104	2.02128	1.57902	1.73517	1.41882	1.3722	-0.19	-0.01	-0.02	0.01	0.1	0	-0.04	-0.09	0.07	0.659151	0.985395	0.966684	0.973229	0.809955	0.994407	0.921588	0.830557	0.878759	1	1	1	1	1	1	1	1	0.982463
ENSG00000269514.3	AC024257.3	0	12	2.85653	2.66023	2.81993	1.9783	1.53332	1.33097	1.63236	1.19138	1.77904	2.68991	1.34069	1.56885	0	0.09	-0.28	-0.18	0.06	-0.41	0.45	-0.3	0.09	0.995997	0.87411	0.606312	0.746158	0.918983	0.460237	0.408816	0.580612	0.869945	1	1	1	1	1	1	1	1	0.981023
ENSG00000249894.1	AC024581.1	0	12	3.42859	3.04177	3.00333	3.48552	1.59913	1.58884	2.04692	1.68645	1.31471	2.03788	1.54633	1.72962	-0.01	-0.07	0.27	0.01	0.32	0.1	0.47	0.31	0.7	0.973222	0.831233	0.405641	0.975121	0.346404	0.788533	0.183719	0.382125	0.045581	1	1	1	1	1	1	1	1	NA
ENSG00000275097.1	AC024940.5	0	12	4.35955	6.24971	4.64543	1.10015	3.09851	2.22934	3.17389	3.25448	3.94087	3.67042	2.02479	1.07832	0.72	0.21	-1.76	-0.43	0	0.01	-0.25	-0.91	-1.55	0.424254	0.816937	0.0556123	0.635871	0.998431	0.992728	0.784031	0.320184	0.091937	1	1	0.639749	1	1	1	1	1	NA
ENSG00000215068.8	AC025171.2	0	12	3.03204	3.11323	3.34481	2.93068	2.30689	2.33085	3.21713	2.43512	3.63367	4.98441	3.17333	3.09804	0.17	0.25	0.2	0.04	0.45	0.06	0.29	-0.11	0.06	0.692084	0.545969	0.625889	0.915238	0.284775	0.885523	0.489636	0.786705	0.890637	1	1	1	1	1	1	1	1	0.984666
ENSG00000256664.1	AC025423.2	0	12	26.5285	27.6712	51.4648	67.08	71.6608	111.247	132.543	159.287	25.4213	44.248	74.5777	107.968	0.21	1.07	1.6	0.65	0.85	1.11	0.68	1.68	2.22	0.786941	0.160837	0.0362267	0.395169	0.267365	0.146349	0.371973	0.0274117	0.00360221	1	1	0.539992	1	1	1	1	0.655211	0.0830177
ENSG00000270558.1	AC025449.1	0	12	1.34632	1.12662	1.09766	1.15975	2.3384	2.31356	2.25679	2.63942	1.23978	1.52798	1.71263	1.00938	-0.16	-0.19	0.03	-0.01	-0.07	0.06	0.16	0.55	-0.03	0.830586	0.797817	0.96838	0.992831	0.920992	0.934895	0.827111	0.458209	0.962643	1	1	1	1	1	1	1	1	NA
ENSG00000259342.1	AC025580.1	0	12	3.64792	3.23721	3.33998	2.06593	2.53388	2.50538	3.12682	3.0126	3.65035	4.21931	2.75209	3.27482	-0.02	-0.01	-0.57	0.01	0.26	0.23	0.03	-0.34	0.15	0.944731	0.97853	0.0927005	0.973311	0.431092	0.531738	0.934697	0.316252	0.655848	1	1	0.754987	1	1	1	1	1	0.934137
ENSG00000275672.1	AC025580.3	0	12	1.74405	1.74025	1.41772	1.1851	1.19288	1.10584	1.25999	1.38088	1.66672	2.07183	1.28911	1.52828	0.15	-0.18	-0.32	-0.07	0.05	0.13	0.13	-0.29	0.15	0.614888	0.534348	0.280768	0.799427	0.853591	0.694558	0.647855	0.318048	0.608605	1	1	0.976119	1	1	1	1	1	0.923458
ENSG00000276853.1	AC026124.2	0	12	2.27948	2.91641	2.50159	1.87928	1.59319	1.44902	1.1162	1.353	2.26968	2.9447	2.54828	1.33161	0.56	0.26	-0.03	-0.05	-0.51	-0.2	0.18	0.24	-0.34	0.560075	0.786267	0.973693	0.958601	0.597157	0.844709	0.849574	0.804372	0.721067	1	1	1	1	1	1	1	1	NA
ENSG00000286156.1	AC026273.1	0	12	5.77842	5.16271	5.41948	4.63625	3.01743	2.66475	3.29529	2.6066	2.88458	3.21669	3.17613	2.69095	-0.01	0.02	-0.07	-0.15	0.11	-0.23	0	0.26	0.21	0.977283	0.932221	0.784267	0.563071	0.659322	0.419599	0.996993	0.314001	0.432752	1	1	1	1	1	1	1	1	0.85179
ENSG00000268129.1	AC026304.1	0	12	2.72587	2.83029	1.7477	2.43694	1.42283	2.4004	1.77301	2.14939	2.09975	2.24305	2.67609	1.57491	0.31	-0.51	0.1	0.77	0.32	0.49	-0.08	0.43	-0.05	0.674337	0.495993	0.890988	0.300376	0.66375	0.525427	0.9193	0.560525	0.944876	1	1	1	1	1	1	1	1	NA
ENSG00000280206.1	AC026401.3	0	12	18.4161	16.8092	13.3832	11.2831	3.71232	3.93838	3.84916	3.8893	8.86787	8.67028	7.19273	4.94065	0.02	-0.35	-0.46	0.09	0.04	0	-0.23	-0.27	-0.44	0.971722	0.609248	0.503964	0.891377	0.957675	0.996291	0.737172	0.696136	0.519173	1	1	1	1	1	1	1	1	0.891202
ENSG00000260914.3	AC026464.4	0	12	11.9153	9.67963	11.5541	11.3794	10.6864	9.07592	8.30534	8.97311	11.2011	11.7204	11.0285	10.0945	-0.14	0.07	0.18	-0.2	-0.35	-0.32	-0.12	0.05	0.14	0.54207	0.747165	0.419533	0.361087	0.115922	0.162883	0.604433	0.823042	0.534897	1	1	1	1	1	1	1	1	0.896369
ENSG00000272617.3	AC026464.6	0	12	8.73681	7.30972	8.80066	10.1553	9.03582	9.45782	9.17261	9.36082	9.82886	11.0637	12.8356	9.68723	-0.12	0.12	0.47	0.08	0.02	0	-0.02	0.48	0.24	0.734839	0.717702	0.167926	0.823448	0.957407	0.998351	0.942082	0.156053	0.478977	1	1	0.876398	1	1	1	1	1	0.874235
ENSG00000260267.1	AC026471.1	0	12	4.19979	3.98943	4.16183	4.43927	3.07971	2.99349	3.03351	3.23034	1.16511	1.41153	1.40013	1.30709	0.1	0.1	0.34	-0.02	-0.01	0	0.13	0.38	0.44	0.756914	0.752358	0.299168	0.957418	0.967203	0.996237	0.692649	0.244667	0.182612	1	1	0.98471	1	1	1	1	1	0.618287
ENSG00000286388.1	AC026748.7	0	12	1.80246	1.62176	1.90766	2.60931	2.72692	2.91273	2.77764	3.24854	1.57548	1.7349	1.7929	1.57228	-0.07	0.18	0.8	0.11	0.03	0.18	0.02	0.31	0.21	0.934568	0.834795	0.364037	0.899324	0.971767	0.83651	0.979702	0.725213	0.808316	1	1	1	1	1	1	1	1	0.968508
ENSG00000254615.3	AC027031.2	0	12	6.14501	5.74735	6.22234	6.27588	3.68892	3.64071	3.55537	3.45456	4.81107	5.35465	4.64472	4.7452	0.14	0.15	0.29	0.03	-0.06	-0.09	-0.01	0.02	0.25	0.776099	0.762526	0.553616	0.953251	0.909618	0.850115	0.97606	0.965456	0.603754	1	1	1	1	1	1	1	1	0.92224
ENSG00000257894.2	AC027288.3	0	12	1.90657	2.08652	1.98768	1.54541	1.65997	1.42652	1.791	1.46143	4.52196	5.30939	3.29703	3.57155	0.25	0.17	-0.05	-0.19	0.07	-0.25	0.06	-0.39	-0.21	0.714598	0.796924	0.944241	0.775806	0.911251	0.719064	0.922958	0.556337	0.747894	1	1	1	1	1	1	1	1	0.958
ENSG00000267317.2	AC027307.2	0	12	2.51708	1.99592	3.09101	3.91228	8.49996	9.52107	8.88459	11.5007	4.32672	5.44825	8.74469	7.70816	-0.19	0.41	0.89	0.18	0.06	0.36	0.2	1.15	1.02	0.731774	0.463531	0.111291	0.741883	0.915326	0.513975	0.714881	0.0382997	0.0666203	1	1	0.792838	1	1	1	1	0.724981	0.386507
ENSG00000272831.1	AC027644.3	0	12	6.50936	6.99027	6.3007	8.75096	4.08558	5.39919	4.60702	5.85599	6.17974	6.42561	6.44993	4.54927	0.32	0.08	0.68	0.43	0.19	0.49	-0.11	0.14	-0.12	0.434406	0.852874	0.0921165	0.294081	0.64629	0.245235	0.788839	0.723425	0.773162	1	1	0.752484	1	1	1	1	1	0.960776
ENSG00000272263.1	AC034198.2	0	12	2.98459	2.4121	3.52851	2.47441	1.79127	1.63499	1.35853	1.41546	2.54384	2.55375	1.99434	1.63545	-0.22	0.35	-0.01	-0.14	-0.4	-0.46	-0.15	-0.31	-0.39	0.785924	0.674975	0.990869	0.861471	0.629071	0.600743	0.851922	0.705616	0.641287	1	1	1	1	1	1	1	1	NA
ENSG00000249102.3	AC034223.1	0	12	2.59117	2.65604	2.68939	1.98892	2.08627	1.5793	2.0029	2.21992	2.55863	3.3538	1.64719	1.86277	0.15	0.16	-0.14	-0.37	-0.09	-0.07	0.23	-0.57	-0.2	0.755305	0.733783	0.776897	0.441039	0.844148	0.890896	0.63448	0.239081	0.669867	1	1	1	1	1	1	1	1	0.93754
ENSG00000260018.1	AC040169.1	0	12	1.1621	1.11468	1.22394	1.17589	1.32432	1.11259	1.14594	1.76122	3.55207	3.48956	4.51965	3.19615	0.1	0.18	0.25	-0.21	-0.18	0.13	-0.23	0.41	0.16	0.829692	0.71006	0.59707	0.646301	0.700268	0.796834	0.597661	0.340848	0.714985	1	1	1	1	1	1	1	1	NA
ENSG00000229212.8	AC044860.1	0	12	4.36362	4.00418	3.04202	2.78084	2.1183	1.66893	1.72231	2.66589	6.39236	7.43931	5.74685	4.48256	0.05	-0.41	-0.41	-0.31	-0.3	0.16	0.03	-0.09	-0.23	0.880598	0.214112	0.210846	0.35775	0.37452	0.657312	0.933384	0.770968	0.47285	1	1	0.919882	1	1	1	1	1	0.871508
ENSG00000248932.6	AC046134.2	0	12	3.02588	2.61684	2.40015	3.04495	2.54236	2.36671	2.84942	2.48145	2.50079	3.52736	3.13011	2.56317	-0.08	-0.22	0.25	-0.07	0.17	-0.05	0.36	0.45	0.29	0.84823	0.572252	0.528119	0.859945	0.66067	0.895343	0.370445	0.259297	0.46093	1	1	1	1	1	1	1	1	0.867433
ENSG00000275180.1	AC048341.2	0	12	7.52468	5.63962	5.89391	4.1528	4.82223	4.56503	4.94163	4.45834	6.75392	7.30356	6.8682	5.49085	-0.28	-0.24	-0.61	-0.04	0.04	-0.17	-0.03	0.08	-0.18	0.690767	0.732676	0.385081	0.948938	0.958078	0.810774	0.966363	0.903823	0.799384	1	1	1	1	1	1	1	1	0.966997
ENSG00000277342.1	AC048344.4	0	12	10.8005	7.59375	9.55088	4.76619	3.99606	2.73529	3.6122	3.29476	2.74346	2.50214	1.62385	1.37082	-0.31	-0.06	-0.94	-0.53	-0.17	-0.29	-0.27	-0.76	-0.81	0.596366	0.922109	0.108985	0.376559	0.778698	0.654452	0.656984	0.218571	0.181944	1	1	0.788209	1	1	1	1	1	NA
ENSG00000259539.1	AC051619.5	0	12	4.44181	4.36637	4.22176	3.29266	3.80103	3.16243	4.24772	4.30598	4.24097	5.32701	3.63233	3.73711	0.13	0.04	-0.19	-0.23	0.13	0.01	0.18	-0.14	0.12	0.650038	0.885187	0.506283	0.419381	0.636877	0.973994	0.531266	0.633859	0.673902	1	1	1	1	1	1	1	1	0.937962
ENSG00000259932.1	AC051619.6	0	12	4.64806	4.71193	3.70755	2.69028	2.26906	1.61443	1.92452	1.34544	4.37213	3.37429	2.31777	2.11027	0.11	-0.23	-0.54	-0.48	-0.22	-1	-0.5	-0.91	-0.79	0.892211	0.783954	0.512998	0.557467	0.792681	0.2525	0.543294	0.270389	0.337752	1	1	1	1	1	1	1	1	0.785508
ENSG00000260035.1	AC051619.7	0	12	26.8324	21.8218	20.6687	15.1692	13.9511	10.3109	9.851	13.1622	20.9252	17.3938	9.72468	7.24031	-0.2	-0.27	-0.57	-0.44	-0.47	-0.26	-0.4	-1.12	-1.37	0.833282	0.773362	0.547425	0.639738	0.620112	0.781927	0.670067	0.23545	0.144414	1	1	1	1	1	1	1	1	0.55922
ENSG00000284095.1	AC055733.4	0	12	6.44864	6.42335	6.09153	4.56719	5.34691	5.00439	5.54237	5.19513	4.97302	7.20367	5.05054	6.01401	0.16	0.04	-0.25	-0.05	0.02	-0.1	0.36	0.15	0.6	0.651816	0.915824	0.475862	0.892887	0.945782	0.788897	0.310553	0.670876	0.0836851	1	1	1	1	1	1	1	1	0.433377
ENSG00000286190.2	AC055839.2	0	12	1.37055	1.48871	2.10461	2.18801	2.01642	1.63376	1.82765	1.18166	4.18536	4.63186	4.89379	5.63723	0.24	0.72	0.92	-0.27	-0.16	-0.71	-0.01	0.3	0.56	0.735372	0.307927	0.19307	0.704077	0.82106	0.32851	0.992361	0.671519	0.425477	1	1	0.898255	1	1	1	1	1	0.847398
ENSG00000267002.4	AC060780.1	0	12	15.188	14.3419	14.4482	11.2193	10.6849	9.22977	10.7955	8.70013	9.91281	13.3606	11.6753	10.0072	0.07	0.05	-0.18	-0.17	0	-0.36	0.28	0.35	0.3	0.756908	0.838319	0.433147	0.45693	0.985208	0.136014	0.227347	0.13196	0.194141	1	1	1	1	1	1	1	1	0.635367
ENSG00000224745.1	AC063965.2	0	12	1.28146	1.82098	2.06766	1.12752	1.14352	1.53876	2.34675	2.32149	1.80541	1.72731	1.12721	1.22333	0.68	0.83	0.05	0.44	0.96	0.95	-0.24	-0.67	-0.32	0.480805	0.387319	0.959519	0.648525	0.31659	0.346603	0.800993	0.484323	0.733634	1	1	1	1	1	1	1	1	NA
ENSG00000228801.6	AC064807.1	0	12	1.77477	1.48733	1.45796	1.42542	1.57398	1.20501	1.23273	1.47871	2.04693	2.27202	2.17102	1.55273	-0.08	-0.17	-0.07	-0.36	-0.39	-0.02	0	0.21	-0.11	0.737784	0.504099	0.772241	0.156353	0.124574	0.942739	0.990303	0.403171	0.672308	1	1	1	1	1	1	1	1	0.93773
ENSG00000284540.1	AC066615.1	0	12	15.9735	13.8116	12.0936	9.6114	8.25855	7.25009	9.76429	6.71176	5.82466	11.0981	6.76471	7.68598	-0.01	-0.29	-0.49	-0.14	0.21	-0.29	0.75	0.31	0.67	0.969754	0.423337	0.168796	0.696041	0.559327	0.448018	0.0387544	0.384677	0.0636622	1	1	0.876398	1	1	1	1	1	0.378033
ENSG00000266962.2	AC067852.2	0	12	2.89996	2.97308	3.99078	4.83463	6.89646	6.22984	5.89338	7.37865	5.00092	5.45671	6.2023	6.15751	0.14	0.57	0.99	-0.12	-0.22	0.03	-0.05	0.41	0.52	0.814797	0.334688	0.0917189	0.835411	0.703036	0.953027	0.935625	0.484076	0.373718	1	1	0.75223	1	1	1	1	1	0.814368
ENSG00000279912.1	AC068448.1	0	12	2.90717	3.23126	3.62487	3.25311	3.02271	3.69629	4.4093	4.21911	2.61478	3.84796	3.31262	3.33643	0.27	0.43	0.42	0.32	0.51	0.43	0.4	0.48	0.61	0.532467	0.325248	0.342209	0.47033	0.242272	0.333816	0.36081	0.275206	0.165978	1	1	1	1	1	1	1	1	0.594125
ENSG00000283228.1	AC068547.1	0	12	2.87168	3.20042	2.0451	2.06955	1.91588	2.4483	1.48439	3.94831	3.14222	3.52213	4.90885	1.92312	0.4	-0.35	-0.2	0.44	-0.42	0.92	-0.02	0.78	-0.38	0.767721	0.796145	0.885386	0.746827	0.757914	0.502339	0.987398	0.568167	0.777593	1	1	1	1	1	1	1	1	0.960843
ENSG00000283674.3	AC068587.4	0	12	2.21808	2.46526	2.46183	1.87167	2.31536	1.98196	2.60624	1.81942	3.16443	4.58398	3.12904	3.13985	0.29	0.26	0.01	-0.19	0.14	-0.39	0.35	0.07	0.37	0.603579	0.631452	0.990197	0.72948	0.80075	0.478954	0.52319	0.891658	0.501228	1	1	1	1	1	1	1	1	0.883457
ENSG00000197099.8	AC068631.1	0	12	5.7546	5.02756	5.5531	3.90216	4.40175	3.63433	5.00855	4.51866	4.74487	6.28731	5.23747	4.45225	-0.03	0.07	-0.31	-0.25	0.15	-0.02	0.26	0.24	0.19	0.90187	0.780369	0.217811	0.31682	0.554131	0.947932	0.285379	0.3351	0.446342	1	1	0.927542	1	1	1	1	1	0.857717
ENSG00000257475.2	AC068888.2	0	12	1.65681	2.16662	1.47212	1.24639	1.93749	1.59067	1.93027	1.50222	1.8698	2.66016	1.53973	1.38388	0.53	-0.04	-0.16	-0.24	-0.05	-0.28	0.37	-0.2	-0.13	0.284605	0.931536	0.747455	0.629159	0.914167	0.598194	0.445693	0.692666	0.798799	1	1	1	1	1	1	1	1	NA
ENSG00000284024.4	AC069544.2	0	12	7.83489	6.57781	5.55623	5.65021	6.66856	6.82442	6.1295	7.38395	10.8129	10.6299	9.74843	8.26397	-0.05	-0.37	-0.22	0.06	-0.13	0.1	-0.17	-0.09	-0.16	0.86487	0.236276	0.484574	0.849861	0.680787	0.760839	0.584934	0.786065	0.604272	1	1	1	1	1	1	1	1	0.922372
ENSG00000286827.1	AC072026.2	0	12	8.12252	8.00188	8.11412	6.05299	5.93539	5.39768	7.08677	5.71448	8.09713	11.4553	6.60491	6.9587	0.1	0.11	-0.17	-0.11	0.23	-0.13	0.34	-0.2	0.07	0.794675	0.773063	0.651375	0.768514	0.556389	0.730223	0.36984	0.599107	0.852261	1	1	1	1	1	1	1	1	0.976145
ENSG00000235499.1	AC073046.1	0	12	4.62642	4.45764	3.78003	4.29231	2.4741	2.084	2.10708	2.88197	4.23377	4.53877	3.97037	3.68198	0.15	-0.17	0.14	-0.21	-0.25	0.1	-0.08	0	0.1	0.702234	0.678497	0.720321	0.611685	0.536867	0.824175	0.850913	0.992617	0.797174	1	1	1	1	1	1	1	1	NA
ENSG00000286171.1	AC073140.1	0	12	8.32552	8.96885	14.3229	9.64919	7.82027	8.22578	11.1466	10.8257	13.0724	4.87726	17.4979	6.92453	0.25	0.87	0.43	0.12	0.5	0.4	-1.55	0.53	-0.65	0.662104	0.128998	0.458999	0.835247	0.375747	0.530822	0.00880629	0.340518	0.256373	1	1	1	1	1	1	1	1	NA
ENSG00000278834.1	AC073508.3	0	12	1.77804	1.66036	1.37545	1.6943	1.63016	1.59149	1.57249	1.73023	2.17397	2.31728	1.85367	1.60034	0	-0.26	0.19	-0.02	-0.04	0.02	-0.05	-0.16	-0.27	0.999302	0.739286	0.809138	0.983624	0.96065	0.976424	0.952461	0.844517	0.736546	1	1	1	1	1	1	1	1	0.955963
ENSG00000277130.1	AC073569.3	0	12	1.73728	2.11273	1.85331	1.30063	1.49827	1.54506	1.57714	1.44842	2.53413	3.14514	1.60241	1.33307	0.45	0.22	-0.17	0.08	0.05	-0.2	0.14	-0.64	-0.76	0.3908	0.683064	0.757924	0.884625	0.925013	0.72948	0.783376	0.228945	0.143394	1	1	1	1	1	1	1	1	NA
ENSG00000288663.1	AC073611.1	0	12	1.85508	1.80026	2.21387	1.76801	1.05099	1.07264	1.15936	1.16717	2.11117	2.60945	2.06206	1.79098	0.15	0.38	0.19	0.06	0.14	0.11	0.14	0.05	0.12	0.700364	0.325042	0.628307	0.880003	0.710142	0.772364	0.713912	0.901486	0.761806	1	1	1	1	1	1	1	1	0.959292
ENSG00000280120.1	AC073857.1	0	12	2.62414	2.62469	2.67663	1.88101	2.54462	2.65638	2.63384	3.6173	3.91574	5.32398	4.05941	2.92061	0.1	0.13	-0.23	0.05	0.02	0.39	0.25	0.08	-0.15	0.881545	0.841307	0.722612	0.938697	0.97595	0.555811	0.704687	0.907226	0.813838	1	1	1	1	1	1	1	1	0.969602
ENSG00000144785.8	AC073896.1	0	12	15.5272	14.2772	15.5679	20.444	14.1876	15.1754	13.1113	16.6914	13.3741	14.2088	18.228	16.3611	-0.08	0.1	0.66	0.12	-0.12	0.16	-0.07	0.58	0.55	0.958121	0.9499	0.669551	0.940477	0.938735	0.917326	0.964366	0.708257	0.72305	1	1	1	1	1	1	1	1	0.951187
ENSG00000234072.1	AC074117.1	0	12	8.80827	8.1744	7.69351	6.84119	7.88227	7.133	7.15843	7.30788	10.8039	12.8293	10.1332	9.73075	0.05	-0.07	-0.11	-0.11	-0.15	-0.16	0.09	0.01	0.12	0.784757	0.699609	0.557574	0.565795	0.435371	0.403813	0.621917	0.951236	0.514019	1	1	1	1	1	1	1	1	0.890199
ENSG00000276308.1	AC078880.4	0	12	1.67465	1.94655	1.98203	1.60523	1.61561	1.12298	1.64799	1.35675	1.77108	2.18055	1.13203	1.41383	0.34	0.36	0.2	-0.5	0.01	-0.41	0.14	-0.58	-0.04	0.43827	0.419132	0.659284	0.265548	0.974558	0.384433	0.747351	0.194722	0.93379	1	1	1	1	1	1	1	1	0.992102
ENSG00000274943.1	AC079684.1	0	12	2.29188	2.28404	2.51931	1.45937	2.72988	1.8945	2.99022	2.05671	4.8431	5.02659	3.38271	2.36788	0.19	0.26	-0.41	-0.47	0.11	-0.32	-0.14	-0.51	-0.79	0.724127	0.623213	0.453479	0.370133	0.825332	0.591807	0.780785	0.324911	0.124935	1	1	1	1	1	1	1	1	NA
ENSG00000286806.1	AC080005.1	0	12	1.8982	1.9742	1.86179	1.17874	1.90137	1.21417	1.77867	1.13537	1.85736	2.69985	1.86446	1.86476	0.2	0.08	-0.45	-0.62	-0.12	-0.54	0.37	0.08	0.25	0.512983	0.791692	0.156582	0.0476788	0.693774	0.126415	0.235212	0.78789	0.424078	1	1	0.864077	1	1	1	1	1	0.847138
ENSG00000257294.2	AC080011.1	0	12	2.80318	2.34536	2.86565	1.92747	2.64825	2.01706	2.90607	3.42727	3.37504	3.8704	2.62829	2.56237	-0.12	0.14	-0.3	-0.37	0.1	0.21	0.06	-0.25	-0.16	0.793613	0.753438	0.507337	0.405203	0.810755	0.653534	0.896534	0.566814	0.71461	1	1	1	1	1	1	1	1	NA
ENSG00000272758.6	AC083798.2	0	12	6.38845	5.22004	5.30315	5.27985	4.88781	5.5803	5.4398	6.90022	3.39682	3.16767	3.00179	1.83168	-0.11	-0.15	-0.02	0.22	0.14	0.29	-0.26	-0.09	-0.59	0.693824	0.597565	0.939249	0.429005	0.615241	0.343995	0.360856	0.751494	0.0449793	1	1	1	1	1	1	1	1	0.318938
ENSG00000203644.3	AC083799.1	0	12	2.66536	2.75513	2.92158	2.05182	5.36312	4.97783	4.71842	4.338	5.56568	6.1319	3.88786	3.06892	0.22	0.25	-0.13	-0.07	-0.19	-0.31	0.01	-0.45	-0.56	0.51814	0.465506	0.716148	0.843826	0.578103	0.382443	0.983293	0.187138	0.0960337	1	1	1	1	1	1	1	1	0.462083
ENSG00000253715.1	AC083841.2	0	12	2.57912	2.51439	2.25223	1.66021	1.63772	1.93816	2.29839	1.39664	2.28278	3.33981	2.06695	2.43519	0.12	-0.08	-0.4	0.29	0.46	-0.27	0.41	-0.06	0.36	0.722714	0.808102	0.240994	0.404162	0.17392	0.493512	0.221474	0.871023	0.291422	1	1	0.948854	1	1	1	1	1	NA
ENSG00000254337.2	AC083967.1	0	12	2.95218	2.53283	2.59595	1.60466	2.33171	1.81073	2.48497	2.59125	3.29487	4.64503	2.49598	2.61662	-0.07	-0.06	-0.64	-0.34	0.05	0.03	0.31	-0.35	-0.05	0.856101	0.859087	0.0802767	0.352515	0.888964	0.941532	0.379677	0.334838	0.896383	1	1	0.720763	1	1	1	1	1	NA
ENSG00000253190.4	AC084082.1	0	12	2.90711	2.9135	2.20645	1.7472	3.34825	2.19516	2.39244	2.71244	3.5228	2.63277	1.0841	1.73766	0.08	-0.29	-0.48	-0.59	-0.47	-0.47	-0.59	-1.71	-0.87	0.932018	0.762357	0.621323	0.542181	0.630877	0.635664	0.545204	0.0809722	0.373314	1	1	1	1	1	1	1	0.897028	0.813984
ENSG00000286699.1	AC084198.2	0	12	2.27724	2.55811	2.92174	2.97052	1.53323	1.43659	1.59127	1.21289	3.20136	3.57063	2.63273	2.49734	0.3	0.47	0.63	-0.06	0.04	-0.31	0.01	-0.18	-0.06	0.40339	0.190504	0.0776104	0.868114	0.914823	0.420912	0.966874	0.619355	0.872538	1	1	0.717287	1	1	1	1	1	0.981816
ENSG00000278743.1	AC087239.1	0	12	1.38302	1.56379	1.59187	1.49636	2.07895	1.51439	1.53406	1.20324	2.90557	3.11851	1.89706	1.69804	0.4	0.33	0.36	-0.43	-0.44	-0.65	-0.04	-0.55	-0.54	0.449347	0.533792	0.490325	0.406238	0.398157	0.258726	0.94463	0.28535	0.291855	1	1	1	1	1	1	1	1	NA
ENSG00000259380.6	AC087473.1	0	12	6.31317	7.14234	7.59333	6.63029	5.75443	6.39969	7.31126	6.60103	5.91915	8.61946	6.54254	6.47375	0.29	0.38	0.33	0.18	0.31	0.14	0.39	0.27	0.39	0.53153	0.415647	0.48292	0.703408	0.498533	0.768789	0.406727	0.566962	0.403528	1	1	1	1	1	1	1	1	0.834457
ENSG00000261879.7	AC087500.1	0	12	2.11109	1.89522	1.74879	1.52096	1.2783	1.24968	1.48654	1.02572	1.76675	2.20649	1.57098	1.94402	0.02	-0.15	-0.22	0	0.2	-0.21	0.14	-0.08	0.44	0.924942	0.539175	0.37072	0.9846	0.414897	0.437639	0.564437	0.747724	0.0742404	1	1	1	1	1	1	1	1	0.406565
ENSG00000259316.12	AC087632.2	0	12	34.208	34.0986	24.6007	19.476	8.00914	11.7503	10.2998	11.2529	50.5748	69.5459	70.813	54.7284	0.22	-0.35	-0.57	0.54	0.32	0.42	0.25	0.55	0.48	0.729631	0.585594	0.370426	0.399055	0.620068	0.515737	0.695492	0.390889	0.450371	1	1	1	1	1	1	1	1	0.861046
ENSG00000262580.5	AC087741.1	0	12	2.17756	2.16112	3.87321	3.8187	1.6596	1.32988	1.6958	1.21488	3.57259	5.47387	5.7128	5.75163	0.14	0.95	1.06	-0.27	0.02	-0.46	0.43	0.82	0.96	0.681228	0.00683744	0.00247027	0.452405	0.950585	0.219247	0.213618	0.0192856	0.00609646	1	0.757337	0.142215	1	1	1	1	0.563123	0.10954
ENSG00000251034.2	AC087854.1	0	12	6.98437	7.85906	7.76138	5.85544	4.22607	4.13335	5.22967	3.54304	10.6988	14.073	8.39168	7.43148	0.28	0.26	0	-0.01	0.28	-0.32	0.22	-0.26	-0.16	0.654339	0.671857	0.998753	0.985602	0.654932	0.605584	0.719672	0.67566	0.79214	1	1	1	1	1	1	1	1	0.965048
ENSG00000280828.1	AC090114.3	0	12	2.14604	1.64141	2.07802	1.94721	1.94226	2.20373	2.54288	1.96954	1.68168	2.07606	1.43184	1.53453	-0.27	0.06	0.12	0.21	0.35	0.01	0.1	-0.14	0.22	0.641714	0.915499	0.838607	0.723664	0.547566	0.981581	0.860634	0.806875	0.712035	1	1	1	1	1	1	1	1	0.948646
ENSG00000269951.1	AC090181.2	0	12	3.6026	3.46684	3.43353	2.8711	2.61159	2.43996	2.59047	2.02066	3.21397	4.15801	3.45588	2.54279	0.14	0.06	-0.07	-0.03	-0.05	-0.26	0.19	0.19	0.01	0.8052	0.921535	0.898783	0.953507	0.924213	0.660739	0.738258	0.740037	0.9854	1	1	1	1	1	1	1	1	0.998796
ENSG00000247134.7	AC090204.1	0	12	14.1903	14.1641	14.0608	14.6804	20.521	19.2803	19.7705	19.7438	1.18342	1.31967	2.32705	1.10556	0.15	0.1	0.3	-0.06	-0.06	-0.11	0.02	1.05	-0.1	0.911854	0.941261	0.829628	0.964572	0.965245	0.937662	0.986464	0.45016	0.943155	1	1	1	1	1	1	1	1	0.994077
ENSG00000270072.1	AC090559.2	0	12	2.52221	2.52394	2.50519	1.82046	1.74891	1.03424	1.82721	1.34076	1.77515	2.33093	1.88592	1.63878	0.18	0.12	-0.22	-0.72	0.07	-0.18	0.21	0.15	0.08	0.642611	0.765769	0.592004	0.0851011	0.855179	0.69217	0.609753	0.716747	0.843061	1	1	1	1	1	1	1	1	NA
ENSG00000254165.1	AC090739.1	0	12	1.90347	1.88414	2.0852	1.55757	4.23356	2.7151	4.11432	2.53606	2.10183	2.57877	1.54126	1.59258	0.16	0.25	-0.04	-0.58	-0.09	-0.6	0.14	-0.36	-0.15	0.737948	0.603771	0.930383	0.223471	0.85761	0.236495	0.774505	0.458832	0.761667	1	1	1	1	1	1	1	1	NA
ENSG00000259363.6	AC090825.1	0	12	5.44022	5.17416	4.94947	4.10138	4.56041	3.90642	4.43581	3.71472	2.94171	3.54268	2.20308	2.24264	0.05	-0.02	-0.16	-0.19	-0.06	-0.37	0.11	-0.34	-0.05	0.902873	0.956739	0.700596	0.652651	0.890765	0.390957	0.799761	0.418316	0.906324	1	1	1	1	1	1	1	1	0.987672
ENSG00000239969.5	AC091390.3	0	12	5.73201	5.10915	4.31967	3.80435	4.47341	3.80412	3.85061	2.92061	6.53729	7.97686	4.9553	5.34244	0.04	-0.28	-0.34	-0.2	-0.22	-0.68	0.12	-0.31	0.15	0.954811	0.683558	0.620524	0.769733	0.749237	0.340178	0.86535	0.654722	0.830058	1	1	1	1	1	1	1	1	0.972219
ENSG00000279901.1	AC092117.2	0	12	2.01763	2.06831	2.08206	1.33769	1.18457	1.11976	1.23947	1.13616	1.27577	1.7858	1.15203	1.38181	0.27	0.17	-0.34	-0.01	0.05	-0.02	0.32	-0.09	0.33	0.669256	0.784632	0.59114	0.9934	0.942327	0.979629	0.617876	0.882022	0.607602	1	1	1	1	1	1	1	1	0.923302
ENSG00000280345.1	AC092184.2	0	12	6.44565	6.24158	6.55129	5.90209	5.03115	4.65749	5.63907	3.72003	5.10336	7.21336	4.71782	5.18005	0.07	0.14	0.13	-0.07	0.14	-0.48	0.35	-0.02	0.31	0.883387	0.775454	0.787428	0.875946	0.76863	0.343544	0.459368	0.962221	0.515364	1	1	1	1	1	1	1	1	0.890416
ENSG00000268362.6	AC092279.1	0	12	9.91395	8.30038	10.2846	8.62405	4.80028	5.16081	6.06707	5.68579	8.09066	10.4556	8.90244	7.50483	-0.09	0.17	0.06	0.13	0.32	0.2	0.21	0.24	0.21	0.71893	0.504043	0.818549	0.623836	0.207443	0.461105	0.407653	0.342346	0.418272	1	1	1	1	1	1	1	1	0.84394
ENSG00000284428.1	AC092329.4	0	12	11.2906	10.5313	8.28264	8.72662	1.63771	1.42037	1.75255	2.42917	2.45744	3.48093	2.432	1.92938	0.09	-0.32	-0.12	-0.17	0.07	0.24	0.32	0.09	-0.1	0.817175	0.393071	0.751853	0.658656	0.864665	0.581955	0.403082	0.821702	0.790008	1	1	1	1	1	1	1	1	0.964343
ENSG00000286147.1	AC092445.1	0	12	9.3955	10.3693	10.1945	9.31567	6.32262	6.86087	8.40631	6.99933	7.96155	11.3585	7.16263	7.99096	0.26	0.23	0.24	0.15	0.38	0.09	0.34	-0.05	0.27	0.524652	0.568165	0.549476	0.715471	0.350716	0.823023	0.398625	0.897778	0.503904	1	1	1	1	1	1	1	1	0.885343
ENSG00000249790.3	AC092490.1	0	12	7.22576	6.99524	6.54588	5.64743	2.32796	2.34992	3.15076	2.47072	3.85213	4.65759	3.97066	4.63097	0.08	-0.03	-0.1	0.05	0.41	0.01	0.1	0.13	0.52	0.874348	0.945346	0.84434	0.920039	0.411784	0.985396	0.84695	0.791796	0.295962	1	1	1	1	1	1	1	1	0.74502
ENSG00000230606.11	AC092683.1	0	12	3.63614	3.20684	3.4821	2.67973	2.94455	2.13241	2.20861	2.1228	4.62304	7.62195	4.5394	6.12161	-0.1	0.04	-0.19	-0.44	-0.44	-0.59	0.56	0.05	0.64	0.888488	0.951008	0.783521	0.527121	0.522223	0.400305	0.411395	0.943464	0.354517	1	1	1	1	1	1	1	1	0.799303
ENSG00000261061.1	AC092718.4	0	12	5.12241	3.58845	3.50207	2.36317	2.89174	3.48595	3.09854	4.34779	6.88998	7.10693	5.80078	3.33924	-0.37	-0.44	-0.87	0.26	0.07	0.43	-0.14	-0.21	-0.75	0.391111	0.308389	0.0427927	0.545738	0.869941	0.337944	0.741758	0.620458	0.0806619	1	1	0.577319	1	1	1	1	1	0.424277
ENSG00000275764.1	AC092747.4	0	12	3.04296	2.71618	3.22132	2.82177	3.34034	3.4093	3.9917	4.19085	3.86572	4.54865	3.52687	2.34314	-0.03	0.19	0.13	0.05	0.23	0.25	0.1	-0.06	-0.49	0.944291	0.606207	0.721834	0.888793	0.545632	0.522884	0.798041	0.864382	0.19787	1	1	1	1	1	1	1	1	0.638872
ENSG00000226026.6	AC092802.1	0	12	4.00254	3.74051	3.81971	3.04706	2.25296	2.11259	2.78174	2.23512	3.6591	5.34507	3.10328	3.42489	0.03	0.04	-0.14	-0.06	0.27	-0.09	0.36	-0.15	0.2	0.943239	0.903229	0.693981	0.859035	0.457318	0.809752	0.319039	0.689448	0.582035	1	1	1	1	1	1	1	1	0.915323
ENSG00000284624.1	AC092902.4	0	12	2.36655	2.41712	2.46309	1.95079	1.65045	1.52985	2.00471	1.69594	2.69584	3.585	2.40482	2.67072	0.16	0.17	-0.03	-0.09	0.25	-0.03	0.25	-0.08	0.24	0.646763	0.631197	0.936288	0.805443	0.485811	0.929778	0.483026	0.831053	0.500441	1	1	1	1	1	1	1	1	0.883423
ENSG00000242622.2	AC092910.3	0	12	1.86991	2.30725	2.34168	2.06468	1.64435	1.6603	1.91478	2.16645	1.55518	1.82354	1.6108	1.36721	0.45	0.44	0.41	0.03	0.2	0.26	0.07	0.16	0.09	0.33688	0.345982	0.379131	0.949712	0.662282	0.585304	0.878931	0.73884	0.847771	1	1	1	1	1	1	1	1	0.975007
ENSG00000233184.7	AC093157.1	0	12	3.36966	2.87288	3.65063	3.61642	3.95388	4.11812	3.51657	4.44304	3.9646	3.91936	3.35876	2.24644	-0.11	0.22	0.34	0.09	-0.17	0.07	-0.11	-0.12	-0.6	0.849085	0.693273	0.551584	0.872798	0.768194	0.900585	0.842921	0.829416	0.290928	1	1	1	1	1	1	1	1	0.740364
ENSG00000272335.1	AC093297.2	0	12	4.05008	3.59532	3.23149	2.54236	2.83911	2.44207	2.47117	1.81589	3.95879	3.74604	2.64059	1.79841	-0.04	-0.21	-0.42	-0.2	-0.22	-0.67	-0.24	-0.54	-0.88	0.909867	0.583526	0.281907	0.610046	0.581709	0.0990405	0.543555	0.16957	0.025288	1	1	0.976181	1	1	1	1	1	0.235319
ENSG00000170846.17	AC093323.1	0	12	13.2978	11.7675	12.5864	10.5846	7.14655	6.47626	6.12661	7.16709	8.98876	9.53431	10.027	7.35606	0	0.04	-0.08	-0.13	-0.22	-0.08	-0.09	0.23	-0.03	0.987302	0.830353	0.657588	0.488505	0.227678	0.683136	0.619034	0.208968	0.859198	1	1	1	1	1	1	1	1	0.978025
ENSG00000285043.2	AC093512.2	0	12	8.03418	7.2269	6.1204	6.45951	2.00792	2.13986	2.20565	2.47418	8.45972	8.50335	6.96398	4.45203	0.04	-0.27	-0.06	0.1	0.14	0.25	-0.2	-0.24	-0.64	0.912646	0.446626	0.861656	0.78996	0.687113	0.489933	0.577786	0.5052	0.0718454	1	1	1	1	1	1	1	1	0.402141
ENSG00000279520.1	AC093525.8	0	12	1.42047	1.47694	1.12151	1.15569	1.10564	1.13259	1.02012	1.09335	1.27433	1.94443	1.05366	1.42981	0.3	-0.21	-0.04	0.13	-0.13	0.04	0.43	-0.2	0.52	0.692886	0.779005	0.957641	0.860417	0.862903	0.956077	0.564395	0.78735	0.490879	1	1	1	1	1	1	1	1	0.878448
ENSG00000232533.1	AC093673.1	0	12	2.62401	2.25004	2.47266	3.48107	13.6926	15.1998	15.2404	16.5771	2.3176	2.32939	3.77408	3.30185	-0.07	0.03	0.66	0.18	0.15	0.22	-0.16	0.84	0.84	0.838871	0.937014	0.0684583	0.610171	0.67225	0.529937	0.672703	0.0206391	0.0213261	1	1	0.687477	1	1	1	1	0.58005	0.218108
ENSG00000250333.2	AC093725.2	0	12	3.96291	3.99874	4.08177	2.659	2.09753	1.85852	2.81604	2.07229	2.87022	3.77976	2.05121	2.57367	0.14	0.16	-0.32	-0.14	0.4	-0.15	0.24	-0.42	0.14	0.742278	0.706478	0.439085	0.734551	0.340813	0.736205	0.569731	0.318487	0.746206	1	1	1	1	1	1	1	1	0.957869
ENSG00000245958.6	AC093752.1	0	12	13.8984	11.0371	10.9801	8.30634	8.00908	7.67076	7.92129	7.42226	13.2235	14.5129	12.6032	11.7956	-0.19	-0.23	-0.5	-0.03	-0.03	-0.16	-0.02	0	0.02	0.65917	0.604292	0.255144	0.951641	0.946864	0.717436	0.959535	0.994977	0.968883	1	1	0.962141	1	1	1	1	1	0.995824
ENSG00000250950.1	AC093752.2	0	12	3.34888	2.66752	2.59323	1.69936	2.54947	2.50398	2.4429	1.5456	3.77286	3.67307	3.09979	2.44689	-0.15	-0.24	-0.72	0.04	-0.08	-0.51	-0.19	-0.2	-0.37	0.740438	0.605524	0.117578	0.922346	0.852742	0.320183	0.677494	0.655713	0.419919	1	1	0.802321	1	1	1	1	1	NA
ENSG00000285458.1	AC093827.5	0	12	1.96704	1.91151	2.04163	1.50588	1.80786	1.47684	2.18578	2.07032	1.80291	2.09217	1.37647	1.49731	0.11	0.17	-0.14	-0.26	0.24	0.06	0.06	-0.31	0	0.679942	0.518617	0.602281	0.314001	0.34652	0.837753	0.8218	0.238481	0.998312	1	1	1	1	1	1	1	1	1
ENSG00000286208.1	AC093838.1	0	12	7.84856	7.11642	9.57373	7.62676	8.54808	9.39304	12.1065	10.4575	1.54062	2.09254	1.43079	1.62068	-0.01	0.4	0.21	0.18	0.46	0.25	0.28	-0.01	0.38	0.984144	0.308494	0.602422	0.64402	0.237382	0.523719	0.478912	0.986366	0.343043	1	1	1	1	1	1	1	1	0.790608
ENSG00000286358.1	AC096647.1	0	12	2.67664	2.50678	3.42905	3.71344	1.08615	1.17941	1.42763	1.28446	2.11363	2.4138	1.8092	1.93576	0.05	0.47	0.73	0.14	0.35	0.19	0.05	-0.1	0.21	0.912649	0.280011	0.0948856	0.744419	0.427394	0.6854	0.911917	0.820767	0.634965	1	1	0.758587	1	1	1	1	1	0.928116
ENSG00000270194.1	AC097359.2	0	12	1.70733	1.95559	1.77182	1.97341	1.09192	1.05985	1.26716	1.26231	1.16996	1.46248	2.199	1.64741	0.37	0.18	0.47	-0.03	0.19	0.1	0.15	1.04	0.7	0.375357	0.676342	0.266833	0.946021	0.651095	0.816625	0.72009	0.0137706	0.0950645	1	1	0.968338	1	1	1	1	0.486787	0.459752
ENSG00000283580.3	AC098484.3	0	12	5.53471	4.47242	6.42818	6.16899	2.842	3.06845	2.89806	2.6509	5.79193	5.05463	5.62759	3.3343	-0.09	0.34	0.4	0.14	0.04	-0.07	-0.35	0.03	-0.58	0.865006	0.535326	0.469191	0.798756	0.946121	0.903191	0.526761	0.957119	0.296661	1	1	1	1	1	1	1	1	0.745362
ENSG00000248161.5	AC098487.1	0	12	2.54561	1.77185	2.20059	2.17458	2.05171	2.20629	1.81663	1.88303	5.23922	4.85887	3.43557	2.50693	-0.33	-0.1	0.01	0.15	-0.18	-0.14	-0.25	-0.56	-0.91	0.620786	0.885446	0.993113	0.819714	0.781706	0.836109	0.70458	0.390128	0.163934	1	1	1	1	1	1	1	1	NA
ENSG00000235449.2	AC098934.1	0	12	2.19598	2.38772	2.91709	2.20239	1.43511	2.20016	2.70427	3.44138	1.84862	3.33183	2.23727	2.08723	0.25	0.48	0.22	0.68	0.85	0.75	0.73	0.54	0.49	0.790184	0.606029	0.81593	0.46993	0.364046	0.473068	0.434087	0.564517	0.602284	1	1	1	1	1	1	1	NA	NA
ENSG00000284734.1	AC099063.4	0	12	2.32344	2.05713	2.60713	2.06926	1.58003	1.38297	1.63172	1.33813	1.73292	2.42828	1.43661	1.75024	-0.07	0.28	0.09	-0.17	0.02	-0.31	0.35	-0.19	0.26	0.891926	0.598459	0.868954	0.750356	0.964489	0.564191	0.507522	0.720554	0.626281	1	1	1	1	1	1	1	1	0.926788
ENSG00000251379.1	AC099550.1	0	12	6.44185	6.93683	7.29419	5.13752	4.01766	3.37894	4.49446	3.17272	5.33229	8.24343	4.28651	4.93903	0.23	0.29	-0.08	-0.22	0.13	-0.42	0.46	-0.23	0.18	0.575923	0.471929	0.851354	0.583216	0.749623	0.316524	0.249916	0.571205	0.656025	1	1	1	1	1	1	1	1	0.93421
ENSG00000253982.2	AC100810.1	0	12	6.99064	4.9009	4.5282	4.23234	4.27334	5.2625	4.37807	6.17323	8.57774	9.20096	9.40453	7.57591	-0.32	-0.51	-0.47	0.32	0.05	0.39	-0.05	0.24	0.08	0.344563	0.138146	0.172151	0.342778	0.887209	0.271485	0.873528	0.482248	0.805506	1	1	0.876634	1	1	1	1	1	0.967802
ENSG00000273338.1	AC103591.3	0	12	13.165	12.1254	8.87418	3.27944	2.50367	3.6591	2.8852	2.86885	17.6796	14.3931	10.1628	9.19089	0.03	-0.45	-1.76	0.59	0.19	0.16	-0.5	-0.86	-0.64	0.974496	0.670759	0.100114	0.583974	0.858377	0.888478	0.637727	0.416132	0.546684	1	1	0.771367	1	1	1	1	1	NA
ENSG00000253505.3	AC103957.1	0	12	2.56692	2.7634	3.30856	2.33821	1.60494	1.75188	2.38288	2.0893	2.93028	3.94329	2.3248	2.46213	0.2	0.48	0.12	0.15	0.53	0.24	0.25	-0.24	0.06	0.734603	0.42155	0.839798	0.798991	0.377408	0.694071	0.671024	0.680529	0.923633	1	1	1	1	1	1	1	1	0.989818
ENSG00000254153.1	AC103957.2	0	12	2.24714	2.0403	2.05049	1.74476	1.4775	1.33329	2.13714	1.93687	3.51027	4.20312	2.39964	2.52423	-0.02	-0.02	-0.12	-0.14	0.48	0.33	0.09	-0.44	-0.1	0.979686	0.977137	0.847182	0.821619	0.432525	0.607925	0.882412	0.46309	0.864012	1	1	1	1	1	1	1	1	NA
ENSG00000239920.2	AC104389.5	0	12	2.84498	2.50419	3.03	3.18833	6.09249	5.31885	4.89854	5.14966	1.94399	2.41204	1.7533	2.02559	-0.01	0.21	0.41	-0.17	-0.32	-0.34	0.14	-0.06	0.29	0.952591	0.404329	0.0991734	0.489338	0.199115	0.188586	0.586122	0.828208	0.248229	1	1	0.769728	1	1	1	1	1	0.699971
ENSG00000260235.1	AC105020.3	0	12	3.62723	3.41991	3.18278	2.3967	2.42137	2.09153	2.97051	2.09113	2.82718	3.91964	2.47948	2.50947	0.08	-0.06	-0.34	-0.18	0.26	-0.16	0.31	-0.08	0.13	0.799565	0.846807	0.298927	0.589066	0.434935	0.674987	0.342721	0.809872	0.692322	1	1	0.98471	1	1	1	1	1	NA
ENSG00000245213.7	AC105285.1	0	12	1.86873	1.9612	1.79308	1.7536	3.2716	3.01691	3.44387	2.99096	1.50496	1.98635	1.31844	1.14042	0.23	0.06	0.15	-0.09	0.07	-0.19	0.21	-0.11	0	0.692408	0.919132	0.788049	0.873155	0.90464	0.745083	0.711534	0.848674	0.994985	1	1	1	1	1	1	1	1	1
ENSG00000250159.7	AC106791.1	0	12	3.55724	3.25408	3.59498	3.07802	4.09377	3.60899	4.29613	3.44627	3.44045	4.81555	2.49013	3.06264	0	0.13	0.04	-0.15	0.05	-0.32	0.33	-0.39	0.08	0.999626	0.714729	0.900153	0.6656	0.879056	0.371338	0.340715	0.264826	0.809286	1	1	1	1	1	1	1	1	0.968899
ENSG00000170089.15	AC106795.1	0	12	15.906	14.2006	12.5344	9.53422	11.9339	14.1634	14.4086	16.6844	51.4976	65.5715	59.4499	60.9984	0.05	-0.22	-0.49	0.26	0.24	0.41	0.13	0.27	0.57	0.924628	0.655043	0.310218	0.594864	0.622163	0.398808	0.786876	0.579643	0.236822	1	1	0.986303	1	1	1	1	1	0.688409
ENSG00000249684.6	AC106795.2	0	12	5.8377	5.31616	4.60564	3.47445	3.89943	3.54036	4.28687	4.04216	7.05589	9.60039	6.80003	7.3917	0.04	-0.22	-0.5	-0.11	0.11	-0.01	0.26	0	0.39	0.905219	0.543891	0.170463	0.763961	0.754588	0.978782	0.463833	0.994896	0.2721	1	1	0.876398	1	1	1	1	1	0.724543
ENSG00000228933.8	AC107419.1	0	12	11.0878	9.5891	11.1291	8.76466	9.22894	7.68728	9.95075	7.76781	10.4401	12.1191	8.85321	6.2761	-0.04	0.13	-0.09	-0.22	0.09	-0.31	0.07	-0.14	-0.39	0.91023	0.743047	0.812028	0.567744	0.809481	0.432042	0.852868	0.708466	0.305449	1	1	1	1	1	1	1	1	0.753255
ENSG00000258765.1	AC107958.2	0	12	1.60492	1.71546	1.76303	1.44421	1.32212	1.07012	1.53075	1.05217	3.84813	5.16479	2.8418	2.72338	0.22	0.25	0.1	-0.29	0.16	-0.33	0.26	-0.37	-0.25	0.631881	0.588173	0.827546	0.531607	0.724488	0.521616	0.560883	0.407963	0.578032	1	1	1	1	1	1	1	1	NA
ENSG00000245025.3	AC107959.1	0	12	3.10728	2.92469	2.06229	1.73375	1.79403	1.84219	2.31838	1.56158	2.23519	2.86801	1.5834	2.2515	0.06	-0.47	-0.6	0.09	0.36	-0.37	0.19	-0.43	0.27	0.867885	0.213158	0.115019	0.814956	0.346857	0.381158	0.613258	0.255027	0.477209	1	1	0.798875	1	1	1	1	1	0.873804
ENSG00000284948.1	AC107959.4	0	12	2.8788	2.12078	2.7065	2.69092	5.62995	5.44568	4.74606	5.8983	4.13187	3.83047	3.58603	2.75481	-0.28	0.02	0.15	-0.02	-0.25	0	-0.28	-0.09	-0.39	0.526931	0.955497	0.732137	0.965953	0.567861	0.993288	0.529167	0.840341	0.37108	1	1	1	1	1	1	1	1	0.813087
ENSG00000265478.2	AC107982.3	0	12	3.32691	2.84923	3.33548	2.05032	2.65536	2.2214	2.81014	2.01529	4.26368	5.80472	3.78222	4.44792	-0.08	0.12	-0.45	-0.22	0.06	-0.39	0.34	-0.08	0.21	0.905459	0.858912	0.488712	0.735252	0.927	0.561933	0.604207	0.903904	0.746584	1	1	1	1	1	1	1	1	0.957869
ENSG00000242588.6	AC108010.1	0	12	3.62352	3.30226	3.30227	3.26242	4.28516	3.90057	5.25688	4.62943	2.40549	2.85595	2.52881	2.04665	0.04	-0.02	0.1	-0.1	0.27	0.01	0.09	0.18	0.09	0.898987	0.953032	0.724665	0.713442	0.350465	0.969801	0.767076	0.530521	0.74542	1	1	1	1	1	1	1	1	0.957869
ENSG00000261889.1	AC108134.2	0	12	2.21737	2.01898	1.73562	1.65315	1.22849	1.35952	1.07751	1.03731	3.27817	2.41015	1.86755	1.83907	0	-0.25	-0.18	0.17	-0.2	-0.29	-0.6	-0.78	-0.58	0.996166	0.556026	0.663747	0.692218	0.639938	0.538245	0.151135	0.0647896	0.167166	1	1	1	1	1	1	1	0.855725	0.595121
ENSG00000259366.1	AC108449.2	0	12	2.64461	2.08635	1.92696	1.97865	2.62344	2.41918	2.90815	1.37595	2.20627	2.62794	1.90542	1.50245	-0.17	-0.34	-0.17	-0.08	0.11	-0.56	0.1	-0.14	-0.27	0.658344	0.372446	0.651384	0.829782	0.75801	0.18956	0.792215	0.720887	0.481725	1	1	1	1	1	1	1	1	NA
ENSG00000287126.1	AC108488.3	0	12	1.45113	1.65104	1.15308	1.02337	1.23481	1.3251	1.23301	1.61159	3.65158	3.58612	2.94595	2.8135	0.32	-0.21	-0.25	0.14	-0.01	0.31	-0.19	-0.25	-0.24	0.575274	0.719975	0.671514	0.815124	0.982284	0.601016	0.742997	0.670946	0.682559	1	1	1	1	1	1	1	1	0.941247
ENSG00000288075.1	AC108519.1	0	12	2.56248	1.89907	1.90863	1.73861	1.6384	1.59104	2.23888	1.66924	1.9487	2.77365	2.11585	2.42967	-0.28	-0.3	-0.31	-0.02	0.43	-0.05	0.35	0.22	0.59	0.246643	0.201153	0.189603	0.942941	0.0717569	0.855336	0.141614	0.353226	0.0129672	1	1	0.896787	1	1	1	1	1	0.167078
ENSG00000239280.1	AC108693.1	0	12	5.71011	6.07237	3.21252	2.51137	6.57249	4.83464	5.54456	2.9987	2.56321	4.18732	2.53263	2.30384	0.35	-0.7	-0.94	-0.37	-0.26	-0.94	0.56	0.08	0.1	0.668874	0.392201	0.25048	0.651886	0.746106	0.264072	0.494232	0.918983	0.89923	1	1	0.955874	1	1	1	1	1	NA
ENSG00000279602.1	AC109326.1	0	12	31.9468	20.2301	15.7357	15.2567	2.42794	2.57059	2.03471	1.93144	15.9898	12.7694	8.6608	7.08696	-0.45	-0.9	-0.81	0.1	-0.24	-0.39	-0.49	-0.9	-0.89	0.362707	0.0712456	0.103786	0.849112	0.633926	0.459309	0.32419	0.0725892	0.0735854	1	1	0.780403	1	1	1	1	0.882237	0.405594
ENSG00000260853.2	AC109460.2	0	12	2.83724	2.95999	3.03655	1.90394	2.02565	1.63217	1.97086	1.9423	2.43988	3.17284	2.26294	2.12916	0.24	0.22	-0.32	-0.27	-0.08	-0.25	0.21	-0.03	0.05	0.501101	0.542674	0.375131	0.463363	0.832347	0.548246	0.566916	0.924847	0.883984	1	1	1	1	1	1	1	1	NA
ENSG00000241956.10	AC109466.1	0	12	25.5716	35.5779	24.5058	12.1777	15.2316	17.8652	22.1011	16.132	31.9299	33.3584	21.5115	22.5494	0.6	0.06	-0.82	0.27	0.5	0.01	-0.11	-0.52	-0.2	0.224498	0.904703	0.0990253	0.589747	0.318146	0.982164	0.827358	0.299276	0.686439	1	1	0.769728	1	1	1	1	1	0.942735
ENSG00000287474.1	AC110614.1	0	12	10.4193	9.26256	9.90901	9.62421	2.56807	2.24418	3.30849	2.60248	2.95761	3.50517	2.22343	2.33228	-0.03	0.04	0.14	-0.16	0.34	-0.09	0.1	-0.34	-0.08	0.939484	0.90451	0.674488	0.63789	0.326674	0.795731	0.775895	0.326758	0.817006	1	1	1	1	1	1	1	1	0.970389
ENSG00000279882.1	AC112702.1	0	12	7.72881	6.25253	7.90462	7.74152	3.99211	4.01665	5.02821	4.89692	3.865	4.37887	2.8914	2.67176	-0.14	0.14	0.24	0.04	0.32	0.19	0.04	-0.33	-0.25	0.553371	0.540776	0.301543	0.874017	0.191748	0.493074	0.88498	0.21826	0.345193	1	1	0.984856	1	1	1	1	1	NA
ENSG00000286713.1	AC113348.3	0	12	1.86754	1.75652	1.44274	1.18318	1.09504	1.01141	1.30495	1.02049	1.87513	2.22761	1.41752	1.56527	0.08	-0.25	-0.41	-0.1	0.21	-0.14	0.07	-0.32	0.04	0.762818	0.351306	0.130035	0.726885	0.445956	0.655448	0.790296	0.235774	0.891424	1	1	0.828379	1	1	1	1	1	0.984666
ENSG00000279691.1	AC113410.3	0	12	11.2931	11.8036	5.19225	4.69506	4.81759	3.99735	4.01857	6.80917	3.28392	2.63379	3.78786	4.74461	0.33	-0.99	-1.01	-0.18	-0.29	0.51	-0.52	0.34	0.88	0.704219	0.258409	0.248963	0.838025	0.742547	0.578156	0.568225	0.702014	0.325598	1	1	0.953832	1	1	1	1	1	NA
ENSG00000271741.1	AC114490.2	0	12	1.32372	1.03844	1.55611	1.47063	1.11478	1.42092	1.35056	1.77719	1.86983	1.8316	1.64705	1.24381	-0.17	0.35	0.41	0.38	0.29	0.59	-0.21	-0.09	-0.32	0.612763	0.28818	0.224275	0.257606	0.39193	0.0888667	0.53463	0.781988	0.338413	1	1	0.934109	1	1	1	1	1	0.78631
ENSG00000204620.3	AC115618.1	0	12	1.89293	1.82108	1.71602	1.69578	1.2218	1.1103	1.66242	1.05278	1.77652	2.06371	1.84979	2.00531	0.12	-0.01	0.11	-0.12	0.41	0.01	0.07	0.12	0.43	0.730683	0.972411	0.746787	0.724603	0.231095	0.984293	0.846124	0.727589	0.200333	1	1	1	1	1	1	1	1	NA
ENSG00000280020.1	AC116407.3	0	12	2.00462	2.04341	1.73452	1.2607	1.49383	1.32699	1.65551	1.66527	1.71122	2.4906	1.65574	1.32356	0.2	-0.07	-0.4	-0.14	0.13	-0.02	0.37	0.03	-0.17	0.656426	0.87086	0.369116	0.745134	0.773848	0.961843	0.406108	0.94487	0.696179	1	1	1	1	1	1	1	1	NA
ENSG00000244398.1	AC116533.1	0	12	324.238	146.521	202.39	189.136	195.728	127.478	75.589	52.833	137.667	272.908	163.6	253.621	-0.95	-0.56	-0.52	-0.58	-1.34	-1.88	0.72	0.37	1.18	0.180192	0.428431	0.466472	0.412444	0.0603709	0.00870078	0.309775	0.607167	0.0981681	1	1	1	1	1	0.57309	1	1	0.466546
ENSG00000248583.1	AC119751.3	0	12	4.79144	6.65064	19.2966	29.1073	31.6101	41.0548	46.0818	52.3676	5.44107	17.4833	30.987	21.9947	0.67	2.14	2.86	0.4	0.52	0.68	1.59	2.63	2.09	0.516515	0.0387921	0.00565278	0.701366	0.61244	0.507725	0.124112	0.0110138	0.042731	1	1	0.22121	1	1	1	1	0.437739	0.310144
ENSG00000276724.1	AC123768.3	0	12	2.40245	1.68163	2.97224	2.55249	2.38031	2.55424	3.1641	3.66926	3.29057	3.86638	1.87244	2.08001	-0.39	0.41	0.31	0.16	0.39	0.59	0.06	-0.75	-0.37	0.448269	0.418159	0.539806	0.760595	0.438287	0.268187	0.900316	0.14439	0.470821	1	1	1	1	1	1	1	1	0.870849
ENSG00000261069.3	AC124312.3	0	12	31.7198	32.0158	38.4787	43.4566	2.76649	2.58006	2.23029	2.62929	23.6121	28.4301	32.6559	36.2489	0.19	0.4	0.71	-0.06	-0.31	-0.16	0.12	0.55	0.74	0.772247	0.544179	0.279281	0.930614	0.636252	0.810832	0.856706	0.398868	0.257681	1	1	0.976119	1	1	1	1	1	0.709739
ENSG00000260261.2	AC124944.2	0	12	5.81105	4.86775	7.33742	6.64029	8.2207	8.13542	8.58567	8.49278	7.12278	8.15377	8.34136	6.89963	-0.09	0.46	0.45	0.03	0.04	0.03	0.03	0.34	0.21	0.762672	0.124605	0.131463	0.926019	0.88359	0.913933	0.921764	0.25206	0.478885	1	1	0.828948	1	1	1	1	1	0.874235
ENSG00000250899.3	AC125807.2	0	12	2.18795	1.67941	1.79428	1.52266	1.89676	1.7557	1.62521	1.6681	1.60822	2.00721	1.40168	1.52557	-0.22	-0.17	-0.28	-0.1	-0.23	-0.27	0.13	-0.15	0.22	0.413574	0.524827	0.292991	0.718047	0.378086	0.331167	0.620864	0.567178	0.415523	1	1	0.982981	1	1	1	1	1	0.842389
ENSG00000249731.1	AC126768.2	0	12	12.8234	12.475	15.9631	14.8072	6.38894	5.75809	7.93263	5.53588	7.9227	9.79362	6.97539	7.1734	0.08	0.43	0.46	-0.13	0.28	-0.24	0.19	-0.06	0.13	0.846315	0.326114	0.288879	0.770644	0.523592	0.592322	0.666401	0.891957	0.770562	1	1	0.982708	1	1	1	1	1	0.960706
ENSG00000266490.1	AC127024.5	0	12	1.40741	1.29811	1.48593	1.86183	1.45084	1.69857	1.93575	1.97694	1.88009	3.18378	2.30094	1.83638	-0.05	0.18	0.66	0.24	0.38	0.29	0.64	0.38	0.19	0.959807	0.861313	0.516208	0.815184	0.705772	0.78533	0.524337	0.70689	0.847049	1	1	1	1	1	1	1	1	NA
ENSG00000279337.1	AC127024.7	0	12	13.705	15.3128	11.3509	9.97625	13.0767	10.0643	12.4708	11.985	13.0431	18.9419	10.4925	10.7135	0.32	-0.15	-0.21	-0.35	-0.08	-0.11	0.37	-0.25	0.01	0.26858	0.608306	0.468796	0.23417	0.774606	0.734298	0.197269	0.404219	0.973836	1	1	1	1	1	1	1	1	NA
ENSG00000280069.1	AC127024.8	0	12	3.28238	3.13198	3.07018	1.9625	2.16572	1.6121	2.29093	1.50688	3.335	5.07325	3.21953	2.93617	0.12	0.03	-0.49	-0.37	0.06	-0.51	0.46	0.04	0.09	0.758707	0.942915	0.204502	0.347018	0.885609	0.215753	0.235962	0.907712	0.817046	1	1	0.909319	1	1	1	1	1	0.970389
ENSG00000270055.1	AC127502.2	0	12	4.47818	3.57631	2.52477	1.88942	4.27996	3.8932	3.43997	2.301	3.6025	3.73918	3.11634	1.88922	-0.13	-0.7	-1.01	-0.09	-0.31	-0.87	-0.12	-0.13	-0.58	0.77852	0.138331	0.0341728	0.84739	0.511305	0.0720533	0.798095	0.778798	0.220679	1	1	0.526171	1	1	1	1	1	0.670913
ENSG00000273568.1	AC131009.3	0	12	4.97228	5.32488	5.34512	4.57632	3.71936	2.50138	2.58755	3.84604	6.26924	5.97751	5.75408	4.05968	0.3	0.24	0.14	-0.54	-0.55	-0.12	-0.25	-0.06	-0.37	0.451231	0.540642	0.723572	0.186663	0.176191	0.801329	0.526293	0.868486	0.355998	1	1	1	1	1	1	1	1	NA
ENSG00000214135.8	AC132008.2	0	12	4.53894	3.81302	3.55815	2.97862	7.49148	7.45547	7.86292	7.73085	5.83404	7.44404	6.89534	6.91777	-0.05	-0.23	-0.36	0.01	0.06	-0.02	0.18	0.35	0.51	0.871007	0.477445	0.2622	0.975302	0.849662	0.949067	0.575204	0.268527	0.109759	1	1	0.966021	1	1	1	1	1	0.492008
ENSG00000268403.2	AC132192.2	0	12	3.00384	2.51	2.1171	1.83571	2.25581	2.10691	2.03436	2.44064	4.1054	3.85744	3.44388	2.03831	-0.06	-0.38	-0.46	-0.05	-0.17	0.11	-0.25	-0.19	-0.76	0.84677	0.252631	0.16852	0.87711	0.60732	0.750899	0.443314	0.552027	0.0215792	1	1	0.876398	1	1	1	1	1	0.219209
ENSG00000288632.1	AC133555.6	0	12	3.28728	3.43126	2.72161	1.50652	2.0496	2.06627	2.05977	1.7638	4.80563	4.44806	3.31	3.57557	0.27	-0.14	-0.89	0.05	-0.03	-0.3	-0.32	-0.49	-0.14	0.652527	0.815838	0.143094	0.936949	0.958773	0.625641	0.593781	0.41993	0.815427	1	1	0.843784	1	1	1	1	1	0.969822
ENSG00000256712.1	AC134349.1	0	12	1.56765	1.3233	2.09959	1.74117	1.47726	1.28757	2.00219	1.51795	1.71171	2.40905	1.6996	1.89014	-0.09	0.54	0.41	-0.18	0.41	-0.27	0.3	0.11	0.43	0.843196	0.250365	0.384263	0.708163	0.374502	0.61249	0.527415	0.812725	0.365832	1	1	1	1	1	1	1	1	NA
ENSG00000256981.1	AC134349.2	0	12	1.91522	1.66158	2.1345	1.14068	1.92678	1.32325	1.92684	1.74138	1.71897	2.41092	1.37881	1.69347	-0.08	0.26	-0.51	-0.51	-0.04	-0.26	0.37	-0.22	0.26	0.85929	0.550656	0.255968	0.248095	0.918778	0.580809	0.40815	0.620453	0.564941	1	1	0.962325	1	1	1	1	1	NA
ENSG00000279573.1	AC134407.2	0	12	2.78774	2.76628	2.35658	1.82693	2.01348	1.95907	2.39671	1.96841	3.42817	3.87897	2.54029	2.63988	0.16	-0.12	-0.36	-0.01	0.21	-0.03	0.01	-0.37	-0.14	0.555433	0.644863	0.179814	0.975558	0.431711	0.907279	0.971138	0.172838	0.599202	1	1	0.88541	1	1	1	1	1	0.920766
ENSG00000255165.1	AC134775.1	0	12	2.06439	1.94519	2.25438	1.70929	1.69931	1.45403	1.4387	2.823	1.83961	2.76071	1.7833	1.89498	0.08	0.25	-0.03	-0.19	-0.26	0.28	0.46	0.07	0.34	0.853613	0.575373	0.954493	0.670472	0.564329	0.570003	0.294601	0.875783	0.444109	1	1	1	1	1	1	1	1	NA
ENSG00000278212.2	AC134878.2	0	12	16.2497	16.853	18.942	18.6098	29.4652	29.649	29.0212	30.0119	11.5094	10.8291	11.7354	8.87312	0.21	0.34	0.45	0.04	-0.03	-0.03	-0.25	0.13	-0.08	0.481217	0.262768	0.131932	0.896205	0.918612	0.925181	0.399907	0.665932	0.799853	1	1	0.828948	1	1	1	1	1	0.967056
ENSG00000278133.1	AC135050.6	0	12	9.64038	8.92306	9.06616	6.64289	9.62239	9.4591	8.75818	9.05666	10.3773	11.2327	12.8561	8.0256	0.07	0.03	-0.28	0.01	-0.14	-0.21	-0.03	0.42	-0.08	0.751993	0.885057	0.233316	0.97987	0.535471	0.399511	0.884587	0.0692833	0.713421	1	1	0.941901	1	1	1	1	0.871587	0.948885
ENSG00000223509.8	AC135983.2	0	12	11.3565	9.58191	8.08805	5.46065	8.69959	7.72375	7.54132	7.77974	7.16629	8.02222	7.55943	4.23575	-0.04	-0.37	-0.82	-0.13	-0.21	-0.25	-0.02	0.14	-0.43	0.924223	0.417091	0.070232	0.767097	0.641382	0.585844	0.96601	0.757649	0.336373	1	1	0.695744	1	1	1	1	1	0.78423
ENSG00000260126.2	AC136431.1	0	12	6.28751	5.82693	6.16281	4.42947	2.51881	1.7451	2.62192	1.96189	3.56594	4.53867	2.51731	2.55923	0.04	0.08	-0.26	-0.5	0.04	-0.46	0.17	-0.42	-0.09	0.938818	0.874459	0.626257	0.351708	0.939519	0.412318	0.746783	0.436336	0.873462	1	1	1	1	1	1	1	1	0.981897
ENSG00000287905.1	AC136431.2	0	12	7.53441	7.45113	7.75534	7.1591	3.49245	2.84769	3.18595	2.92372	1.41573	1.54261	1.3153	1.1764	0.1	0.15	0.19	-0.27	-0.14	-0.35	-0.07	-0.01	0.27	0.945044	0.916104	0.892294	0.844932	0.917624	0.805947	0.959273	0.991494	0.844693	1	1	1	1	1	1	1	1	0.974336
ENSG00000250999.2	AC136604.2	0	12	1.64457	1.40751	2.02281	1.40189	1.06504	1.27477	1.17901	1.13413	1.3944	2.56984	3.08943	2.51601	-0.07	0.41	0.01	0.28	0.14	0.2	0.71	1.27	1.14	0.86067	0.28435	0.978606	0.474983	0.719101	0.657665	0.0584947	0.000643188	0.00213004	1	1	1	1	1	1	1	0.111618	NA
ENSG00000287074.1	AC137561.1	0	12	2.29254	2.65142	2.77217	2.19387	2.80291	2.38233	3.273	2.01261	2.6275	3.98157	2.82705	2.60116	0.34	0.39	0.19	-0.2	0.2	-0.46	0.44	0.21	0.3	0.378669	0.31427	0.631702	0.607899	0.610473	0.259876	0.255989	0.58236	0.436102	1	1	1	1	1	1	1	1	0.853547
ENSG00000266340.1	AC138207.7	0	12	17.5218	17.0917	16.254	13.8636	8.74993	8.1451	9.68307	9.0922	26.2817	29.6903	18.7887	20.3649	0.12	0.01	-0.09	-0.06	0.11	0.01	0.01	-0.42	-0.17	0.760785	0.979006	0.818226	0.866967	0.765973	0.982432	0.985092	0.275115	0.650135	1	1	1	1	1	1	1	1	0.933184
ENSG00000185495.10	AC138393.1	0	12	4.94967	4.57488	5.88314	5.08933	3.55925	3.58675	3.78257	3.37305	7.94755	7.43836	6.06883	4.82813	0.02	0.36	0.29	0.06	0.06	-0.05	-0.25	-0.28	-0.45	0.966189	0.384482	0.488446	0.87733	0.890005	0.89865	0.548029	0.505089	0.27908	1	1	1	1	1	1	1	1	0.728886
ENSG00000278467.1	AC138393.3	0	12	3.26244	3.83049	3.09339	2.94712	3.68281	3.99693	3.5703	3.34795	6.69107	7.26336	5.49474	4.53171	0.38	0.03	0.09	0.19	-0.04	0.04	-0.07	-0.2	-0.3	0.406813	0.949787	0.838827	0.667276	0.933002	0.942176	0.871643	0.649934	0.509142	1	1	1	1	1	1	1	1	0.88772
ENSG00000215158.9	AC138409.2	0	12	13.8005	10.5301	10.1789	9.27067	7.37575	5.83003	6.82643	4.46679	6.23592	8.01004	4.8375	4.18652	-0.24	-0.33	-0.32	-0.31	-0.12	-0.75	0.16	-0.3	-0.29	0.447377	0.306399	0.315612	0.334785	0.712311	0.0225668	0.606743	0.349536	0.362552	1	1	0.987298	1	1	0.875227	1	1	0.807047
ENSG00000286406.1	AC138776.1	0	12	1.27156	1.51968	2.68748	3.19831	4.88397	7.35306	8.38508	10.168	1.39037	2.79149	4.10752	3.30296	0.43	1.2	1.58	0.61	0.75	0.99	0.89	1.72	1.42	0.522796	0.0713434	0.0176362	0.361283	0.258611	0.13451	0.179959	0.00978446	0.0329429	1	1	0.384648	1	1	1	1	0.421451	0.271388
ENSG00000183889.12	AC138969.1	0	12	29.0698	22.285	24.7986	21.6067	34.0233	29.611	29.3148	31.3479	76.0674	69.0166	48.6357	37.8258	-0.27	-0.12	-0.19	-0.17	-0.23	-0.17	-0.3	-0.55	-0.74	0.558842	0.794874	0.680358	0.713443	0.616621	0.718236	0.515114	0.238554	0.115451	1	1	1	1	1	1	1	1	0.504843
ENSG00000249592.6	AC139887.2	0	12	6.89587	5.63331	6.86844	6.30721	7.46514	7.43124	7.86671	7.38716	7.26041	8.72886	5.22673	5.75568	-0.14	0.11	0.12	0.04	0.07	-0.03	0.12	-0.4	-0.12	0.702026	0.762816	0.745447	0.905186	0.850995	0.944619	0.742673	0.27349	0.743519	1	1	1	1	1	1	1	1	0.957869
ENSG00000215154.6	AC141586.1	0	12	4.24872	3.43678	4.13439	3.49426	1.55328	1.21009	1.3062	1.24531	2.43367	2.57242	2.17164	1.99977	-0.07	0.09	-0.04	-0.32	-0.26	-0.36	-0.09	-0.09	-0.1	0.913904	0.891319	0.948228	0.627127	0.696078	0.586375	0.895247	0.886763	0.884741	1	1	1	1	1	1	1	1	0.984492
ENSG00000263731.1	AC145207.5	0	12	3.57904	2.87508	3.03655	2.14517	2.99091	3.3731	3.20396	3.32602	5.6289	6.50676	7.04258	5.5242	-0.2	-0.13	-0.49	0.19	0.08	0.09	-0.01	0.37	0.36	0.758089	0.848218	0.461633	0.777184	0.901208	0.892926	0.991799	0.579432	0.588619	1	1	1	1	1	1	1	1	0.91669
ENSG00000278876.1	AC145207.9	0	12	2.53805	2.49247	3.2619	2.16956	1.59099	1.34176	1.55243	3.03534	5.25694	6.57665	3.72163	3.93824	0.13	0.47	0.01	-0.21	-0.05	0.61	0.13	-0.45	-0.14	0.700875	0.165083	0.965773	0.576296	0.885309	0.141458	0.678511	0.16616	0.660195	1	1	1	1	1	1	1	1	NA
ENSG00000251417.2	AC145285.2	0	12	2.07364	1.92723	2.23322	1.71422	2.12546	1.79367	2.30684	1.98165	1.78468	2.28763	1.70106	1.75141	0.06	0.22	-0.03	-0.21	0.1	-0.13	0.22	0.02	0.22	0.816269	0.418225	0.9147	0.45201	0.718089	0.661163	0.430343	0.937795	0.42406	1	1	1	1	1	1	1	1	0.847138
ENSG00000260141.1	AC145350.2	0	12	3.09924	2.96911	3.87158	2.69575	1.34993	1.36934	1.8973	1.2415	1.41492	1.90294	1.54681	1.34238	0.04	0.44	0.04	0.02	0.45	-0.21	0.25	0.24	0.26	0.940173	0.418498	0.940622	0.974038	0.406816	0.717208	0.646741	0.664528	0.631459	1	1	1	1	1	1	1	1	0.928116
ENSG00000269983.1	AC146944.2	0	12	3.8705	4.48247	8.35631	6.14947	14.5197	15.7859	14.4977	14.0084	3.54832	4.19298	3.03306	3.03956	0.25	1.21	0.91	0.14	-0.01	-0.12	0.12	-0.42	-0.24	0.936643	0.702493	0.773513	0.965352	0.998123	0.970441	0.9701	0.89378	0.939156	1	1	1	1	1	1	1	1	0.993216
ENSG00000274615.1	AC233968.1	0	12	2.16994	1.7934	2.38349	1.26584	2.55091	2.45002	3.5694	2.56253	1.52535	1.80737	1.10192	1.11431	-0.06	0.26	-0.54	-0.03	0.46	-0.02	0.13	-0.34	-0.21	0.910974	0.629986	0.31227	0.956296	0.386099	0.969075	0.810537	0.531371	0.697671	1	1	0.986332	1	1	1	1	1	0.944906
ENSG00000269902.1	AC234772.1	0	12	10.0684	7.45684	5.61198	5.61074	15.0241	12.4563	15.1123	13.1392	6.55188	7.28523	5.94181	3.83812	-0.22	-0.72	-0.61	-0.24	-0.03	-0.22	-0.03	-0.09	-0.41	0.783895	0.377322	0.453498	0.769233	0.9684	0.785531	0.969784	0.911786	0.616087	1	1	1	1	1	1	1	1	0.925847
ENSG00000277702.1	AC239859.5	0	12	7.15273	6.56328	7.16296	8.18452	2.66754	2.1288	1.81328	1.54628	1.14546	1.79694	1.00462	1.22581	0.1	0.12	0.42	-0.35	-0.6	-0.97	0.35	-0.18	0.55	0.943237	0.931297	0.770891	0.811813	0.678031	0.534014	0.811169	0.905243	0.7103	1	1	1	1	1	1	1	1	NA
ENSG00000264207.1	AC239868.1	0	12	1.81318	2.12343	1.74432	2.11786	1.00887	1.16666	1.17775	1.48848	5.41829	4.83951	4.85559	2.94622	0.39	0.06	0.48	0.22	0.21	0.52	-0.34	-0.1	-0.48	0.54801	0.927681	0.460693	0.733321	0.747649	0.445347	0.604569	0.877566	0.460877	1	1	1	1	1	1	1	1	0.867433
ENSG00000276054.1	AC243654.3	0	12	2.11885	2.067	2.27252	1.48567	1.54155	1.21855	1.58038	1.47338	1.92798	2.74519	1.4552	2.15047	0.12	0.22	-0.26	-0.32	0	-0.35	0.32	-0.33	0.46	0.725157	0.532019	0.462362	0.367994	0.997024	0.390009	0.355384	0.347983	0.183537	1	1	1	1	1	1	1	1	NA
ENSG00000237550.5	AC243919.1	0	12	1304.9	1144.88	1127.81	1176.74	551.662	518.412	484.685	490.572	971.931	962.771	989.02	718.164	-0.01	-0.09	0.1	-0.07	-0.19	-0.22	-0.18	0.1	-0.17	0.927499	0.436975	0.405693	0.585717	0.107221	0.0637463	0.133405	0.380316	0.151019	1	1	1	1	1	1	1	1	0.572789
ENSG00000272779.1	AC245060.4	0	12	4.57233	3.45693	4.14212	4.50956	4.52865	4.3011	4.13843	5.17982	7.27026	7.2977	7.99138	5.72918	-0.21	-0.03	0.23	-0.05	-0.14	0.18	-0.17	0.22	-0.09	0.343291	0.91075	0.311403	0.834455	0.544943	0.456507	0.43488	0.325084	0.687756	1	1	0.986332	1	1	1	1	1	0.942735
ENSG00000274265.5	AC245297.3	0	12	31.8719	27.5046	30.4284	25.7082	22.0382	21.6555	24.1358	20.8145	8.93133	7.70446	7.94199	5.63168	-0.04	0.05	-0.06	0.03	0.11	-0.11	-0.42	-0.08	-0.14	0.96972	0.964957	0.958934	0.977934	0.925728	0.922985	0.714304	0.945603	0.90128	1	1	1	1	1	1	1	1	0.986607
ENSG00000287979.1	AC253572.1	0	12	56.2287	37.856	33.0243	31.6806	3.36173	4.32207	3.34706	4.72522	40.4978	34.57	23.2648	23.1412	-0.42	-0.65	-0.57	0.38	0.01	0.43	-0.4	-0.8	-0.54	0.336237	0.133551	0.188379	0.381827	0.978847	0.339187	0.361902	0.0649338	0.213683	1	1	0.895338	1	1	1	1	0.856558	0.661587
ENSG00000272482.1	AC254633.1	0	12	7.68199	5.51819	6.10542	5.83579	4.02884	5.28862	5.048	3.8945	10.1653	12.3277	7.02723	7.74748	-0.31	-0.21	-0.15	0.42	0.34	0	0.14	-0.49	-0.3	0.717805	0.808844	0.865786	0.623409	0.689896	0.999988	0.867607	0.5666	0.731301	1	1	1	1	1	1	1	1	0.954644
ENSG00000060971.19	ACAA1	0	12	7.45348	7.51158	7.95537	8.77947	6.40375	7.58834	6.93238	8.72222	8.8871	10.2158	11.0163	10.6882	0.21	0.22	0.5	0.26	0.1	0.37	0.02	0.4	0.53	0.49281	0.473456	0.0994663	0.388512	0.740996	0.233625	0.948176	0.187578	0.084392	1	1	0.770497	1	1	1	1	1	0.435037
ENSG00000167315.18	ACAA2	0	12	14.2191	11.7813	11.5514	9.22081	10.7279	11.7032	9.62434	11.2302	18.1337	19.3174	23.2139	14.5402	-0.1	-0.18	-0.38	0.16	-0.16	0.04	-0.06	0.47	-0.03	0.640595	0.381665	0.0708272	0.44114	0.440297	0.835587	0.760756	0.0240979	0.89853	1	1	0.697914	1	1	1	1	0.623657	0.986048
ENSG00000278540.5	ACACA	0	12	19.8207	17.0707	14.5569	13.3866	13.2246	11.3626	13.0107	10.5045	27.1739	27.9357	20.7077	17.4249	-0.03	-0.33	-0.31	-0.19	-0.05	-0.4	-0.15	-0.36	-0.33	0.939529	0.334421	0.354472	0.579648	0.890624	0.234219	0.651928	0.282039	0.327818	1	1	1	1	1	1	1	1	0.776167
ENSG00000111271.15	ACAD10	0	12	8.24807	8.04824	9.48154	10.5457	8.63445	8.76741	9.16757	8.73051	7.03877	7.74067	4.77414	5.13528	0.09	0.31	0.61	0.05	0.08	-0.05	-0.01	-0.47	-0.19	0.796443	0.379981	0.0884576	0.887848	0.824935	0.896907	0.966761	0.188738	0.588001	1	1	0.744135	1	1	1	1	1	0.916464
ENSG00000240303.8	ACAD11	0	12	17.381	14.1517	18.1496	15.0143	27.9407	30.2147	30.0947	32.3389	9.11449	8.02969	6.27899	4.43788	-0.15	0.18	0.03	0.15	0.1	0.15	-0.33	-0.47	-0.84	0.678576	0.623043	0.931987	0.685957	0.77427	0.677983	0.358765	0.190075	0.0210333	1	1	1	1	1	1	1	1	0.216823
ENSG00000151498.12	ACAD8	0	12	8.40018	7.16626	8.85827	9.35146	6.33072	6.27833	5.7199	5.79793	10.087	10.8404	12.0191	10.1117	-0.09	0.19	0.41	0.01	-0.14	-0.18	-0.07	0.34	0.27	0.773753	0.525203	0.170137	0.962183	0.63579	0.55973	0.815237	0.249666	0.360657	1	1	0.876398	1	1	1	1	1	0.805527
ENSG00000177646.19	ACAD9	0	12	12.4513	10.3841	10.9923	9.6083	12.2449	12.8229	12.339	14.3472	14.2858	15.0178	16.7992	13.7279	-0.12	-0.07	-0.12	0.08	0	0.15	-0.08	0.32	0.14	0.786193	0.875379	0.773643	0.84714	0.997752	0.71967	0.847409	0.454151	0.748004	1	1	1	1	1	1	1	1	0.958
ENSG00000117054.14	ACADM	0	12	15.1179	12.9085	12.667	13.11	13.9905	13.8539	12.8194	12.9806	19.6008	19.2799	19.6059	12.3847	-0.11	-0.15	0.05	0	-0.13	-0.17	-0.17	0.07	-0.45	0.828739	0.768663	0.922429	0.998049	0.796755	0.73691	0.727118	0.887501	0.364304	1	1	1	1	1	1	1	1	0.808307
ENSG00000122971.9	ACADS	0	12	3.61498	3.05504	3.66544	4.02026	2.71579	3.12727	2.92883	3.68812	6.23317	5.91324	9.04212	6.01204	-0.09	0.13	0.41	0.22	0.11	0.39	-0.22	0.63	0.06	0.898505	0.855027	0.578996	0.761754	0.881874	0.594243	0.763198	0.388627	0.930763	1	1	1	1	1	1	1	1	0.991328
ENSG00000196177.13	ACADSB	0	12	3.81322	3.71759	4.87582	4.9406	2.98772	3.06957	2.77399	3.35142	6.70559	6.35221	4.42344	2.89724	0.07	0.46	0.63	0.06	-0.12	0.1	-0.26	-0.54	-0.9	0.897889	0.417546	0.268579	0.918669	0.831531	0.857226	0.651185	0.345057	0.116364	1	1	0.970578	1	1	1	1	1	0.505728
ENSG00000072778.20	ACADVL	0	12	177.413	152.823	202.255	209.172	108.481	131.641	121.96	142.299	140.563	164.655	187.777	163.435	-0.02	0.31	0.49	0.31	0.17	0.33	0.06	0.52	0.46	0.92857	0.247315	0.0655901	0.251699	0.51684	0.214262	0.832829	0.0493885	0.0828607	1	1	0.679916	1	1	1	1	0.779652	0.43083
ENSG00000114331.15	ACAP2	0	12	18.4842	15.191	14.8432	12.9735	39.9753	39.2241	38.4173	39.9658	27.0389	27.5754	20.7757	17.0012	-0.11	-0.2	-0.27	0	-0.07	-0.07	-0.12	-0.33	-0.45	0.667368	0.435272	0.29623	0.997897	0.785179	0.784445	0.628273	0.201278	0.0799649	1	1	0.983993	1	1	1	1	1	0.422676
ENSG00000131584.19	ACAP3	0	12	11.0391	8.76194	10.4734	9.01392	5.99407	7.0941	7.01288	8.86194	12.5998	14.2995	11.925	11.7267	-0.18	0.04	-0.04	0.25	0.2	0.5	0.01	-0.04	0.16	0.516904	0.888743	0.871851	0.363631	0.467985	0.0705571	0.961228	0.882546	0.555601	1	1	1	1	1	1	1	1	0.907245
ENSG00000075239.14	ACAT1	0	12	36.0052	33.215	37.8463	36.9049	31.7379	29.5706	28.5331	31.1205	61.7311	62.4148	59.4672	42.053	0.05	0.19	0.29	-0.09	-0.16	-0.09	-0.16	0.03	-0.23	0.835726	0.454094	0.255267	0.73401	0.521222	0.730527	0.516127	0.917961	0.356419	1	1	0.962141	1	1	1	1	1	0.800389
ENSG00000120437.9	ACAT2	0	12	10.9694	8.64213	6.98552	5.7895	20.5114	25.1785	25.649	31.5401	22.2094	22.1259	23.1364	15.5466	-0.16	-0.53	-0.68	0.31	0.29	0.57	-0.21	0.14	-0.14	0.752408	0.290342	0.176675	0.534226	0.560367	0.259337	0.673811	0.783354	0.777592	1	1	0.882689	1	1	1	1	1	0.960843
ENSG00000182827.9	ACBD3	0	12	37.1424	32.3883	34.8224	30.9262	15.4699	18.9189	16.7677	21.7637	26.3545	24.8997	24.476	18.0664	0.03	0.04	-0.02	0.32	0.11	0.43	-0.27	-0.04	-0.23	0.951685	0.94782	0.970459	0.571974	0.847748	0.441102	0.625498	0.945532	0.6762	1	1	1	1	1	1	1	1	0.939077
ENSG00000181513.15	ACBD4	0	12	3.48813	3.39827	5.04011	5.6518	1.90684	2.6434	2.95742	3.67674	7.69529	8.88545	10.6567	10.6225	0.12	0.65	0.95	0.49	0.63	0.89	0.07	0.59	0.6	0.854996	0.314949	0.141226	0.446692	0.328632	0.171139	0.916735	0.362145	0.350131	1	1	0.842395	1	1	1	1	1	0.796288
ENSG00000107897.20	ACBD5	0	12	13.4281	11.5819	12.2019	10.6404	7.58085	8.27625	7.71258	8.53226	14.1086	12.9093	11.289	8.42725	-0.01	-0.01	-0.09	0.15	0.01	0.1	-0.28	-0.26	-0.57	0.990445	0.978354	0.859014	0.767206	0.977257	0.835523	0.568995	0.598787	0.248428	1	1	1	1	1	1	1	1	0.700065
ENSG00000230124.8	ACBD6	0	12	25.1306	20.786	20.7393	18.7436	22.4986	19.4555	18.79	17.9798	41.1934	43.6811	36.3693	28.1644	-0.12	-0.16	-0.18	-0.18	-0.26	-0.38	-0.1	-0.11	-0.21	0.755839	0.682637	0.658437	0.651697	0.520023	0.343227	0.798663	0.775664	0.607317	1	1	1	1	1	1	1	1	0.92312
ENSG00000110455.14	ACCS	0	12	4.25234	4.34171	6.79232	7.43683	4.42068	4.91016	5.1331	4.77883	4.29533	5.53174	8.26767	6.75847	0.14	0.78	1.07	0.18	0.2	0.08	0.22	1.08	0.82	0.849008	0.287589	0.148454	0.805209	0.785328	0.919117	0.764231	0.142259	0.266405	1	1	0.852216	1	1	1	1	1	0.717665
ENSG00000102977.17	ACD	0	12	14.7846	11.7759	12.5165	11.6007	7.87298	6.74905	6.30737	6.61376	13.4671	12.9217	12.1005	8.94141	-0.13	-0.12	-0.1	-0.2	-0.31	-0.31	-0.26	-0.1	-0.32	0.727862	0.748091	0.770973	0.576704	0.383969	0.395901	0.463115	0.790334	0.373029	1	1	1	1	1	1	1	1	0.813984
ENSG00000078124.12	ACER3	0	12	7.75185	7.76599	6.87858	6.21377	4.57801	4.12988	3.82579	3.93231	5.58153	4.9407	3.61761	2.31661	0.19	-0.05	-0.07	-0.11	-0.24	-0.3	-0.35	-0.61	-0.97	0.637328	0.893927	0.857835	0.784372	0.540965	0.459554	0.385309	0.126765	0.015606	1	1	1	1	1	1	1	1	0.186271
ENSG00000100813.14	ACIN1	0	12	29.4868	26.6559	26.1323	25.8342	33.9023	36.9783	35.6176	38.9603	39.7739	46.0137	42.9904	41.2195	0.05	-0.05	0.06	0.15	0.06	0.14	0.01	0.19	0.37	0.865647	0.856892	0.825959	0.605922	0.82445	0.620424	0.958953	0.510016	0.19753	1	1	1	1	1	1	1	1	0.638515
ENSG00000131473.17	ACLY	0	12	32.797	32.0151	35.4684	35.6846	37.3374	39.859	37.8784	42.3262	37.7146	38.9735	38.7987	33.8636	0.11	0.23	0.38	0.12	0.01	0.12	-0.13	0.1	0.08	0.725194	0.478566	0.235343	0.713328	0.983143	0.699224	0.68132	0.751745	0.799349	1	1	0.943626	1	1	1	1	1	0.966997
ENSG00000122729.19	ACO1	0	12	7.96684	6.94672	8.88306	8.54737	29.7473	28.2864	26.7728	28.5749	11.0427	10.7065	10.8268	8.2289	-0.02	0.28	0.35	-0.05	-0.15	-0.12	-0.22	0.04	-0.11	0.949705	0.312145	0.202638	0.855447	0.578698	0.658223	0.420011	0.881351	0.701172	1	1	0.907196	1	1	1	1	1	0.945961
ENSG00000100412.17	ACO2	0	12	17.5537	13.9658	14.7428	14.1801	19.5364	19.2757	18.6566	20.3878	41.3605	42.7083	36.5192	35.7403	-0.15	-0.13	-0.06	0.01	-0.07	0.02	-0.12	-0.11	0.04	0.4008	0.44952	0.743742	0.970051	0.682157	0.924622	0.473477	0.53789	0.795533	1	1	1	1	1	1	1	1	0.965962
ENSG00000112304.11	ACOT13	0	12	4.94364	4.69633	5.41665	5.57802	4.59264	4.3329	4.20315	5.02537	16.8809	17.3599	16.1216	9.53305	0.11	0.25	0.42	-0.06	-0.12	0.07	-0.14	0.04	-0.48	0.766826	0.49993	0.259972	0.866159	0.754123	0.86308	0.705693	0.905781	0.19602	1	1	0.965013	1	1	1	1	1	0.636928
ENSG00000119673.14	ACOT2	0	12	2.00793	2.40947	2.54736	2.44776	3.73601	3.56335	3.25073	3.31055	17.6569	17.0189	21.4124	14.1965	0.41	0.46	0.55	-0.04	-0.2	-0.27	-0.21	0.39	-0.03	0.206057	0.162107	0.0923042	0.889378	0.529192	0.420387	0.502004	0.219373	0.917555	1	1	0.75349	1	1	1	1	1	0.989252
ENSG00000097021.20	ACOT7	0	12	57.3625	55.8705	55.2262	60.0946	30.7705	35.2374	33.1472	36.4142	19.5942	19.9869	20.1105	21.0769	0.16	0.07	0.31	0.22	0.11	0.18	-0.14	0.1	0.28	0.731956	0.891677	0.512814	0.641424	0.81154	0.709326	0.772793	0.841388	0.557492	1	1	1	1	1	1	1	1	0.907973
ENSG00000101473.17	ACOT8	0	12	12.5227	11.2341	13.1491	12.6414	6.95732	7.05449	7.04701	8.57893	9.40305	10.0283	8.44039	6.82185	0.02	0.19	0.27	0.04	0.02	0.19	-0.09	-0.1	-0.21	0.919031	0.409333	0.248262	0.869328	0.915905	0.440407	0.70789	0.671007	0.36518	1	1	0.953445	1	1	1	1	1	0.808621
ENSG00000123130.17	ACOT9	0	12	32.3933	25.822	27.5228	23.8935	16.8179	18.578	17.1841	18.379	27.1185	24.127	23.1288	15.8417	-0.1	-0.11	-0.2	0.16	0.01	0.07	-0.34	-0.17	-0.53	0.819624	0.810121	0.661994	0.726771	0.982613	0.883296	0.461669	0.716437	0.246263	1	1	1	1	1	1	1	1	0.69878
ENSG00000161533.12	ACOX1	0	12	13.7011	11.9654	15.0978	15.3333	7.70709	9.12489	8.4942	10.8121	18.4089	19.9492	31.3503	22.559	-0.01	0.26	0.41	0.27	0.14	0.42	-0.05	0.91	0.55	0.978671	0.412456	0.189847	0.389849	0.664312	0.187553	0.867878	0.00389163	0.0808943	1	1	0.897199	1	1	1	1	0.272648	0.424758
ENSG00000087008.16	ACOX3	0	12	5.03116	4.29388	5.3118	5.33034	4.85298	4.5008	4.57457	5.50612	4.9318	5.01216	4.14804	3.71455	-0.08	0.19	0.34	-0.07	-0.08	0.09	-0.11	-0.19	-0.19	0.836983	0.622548	0.383417	0.847184	0.835374	0.808551	0.779321	0.625453	0.624313	1	1	1	1	1	1	1	1	0.926444
ENSG00000143727.16	ACP1	0	12	70.8568	52.5644	51.2158	43.5401	33.6184	32.9462	30.4477	31.2545	98.7245	89.6401	71.6108	47.0224	-0.24	-0.35	-0.46	-0.01	-0.14	-0.17	-0.31	-0.4	-0.76	0.425927	0.245487	0.125959	0.978709	0.638376	0.569158	0.305557	0.176498	0.010636	1	1	0.821661	1	1	1	1	1	0.148324
ENSG00000162836.12	ACP6	0	12	20.2329	19.0658	21.6896	23.9891	8.62369	6.95692	5.93186	4.64836	9.11271	9.28103	9.84656	7.4396	0.04	0.21	0.51	-0.27	-0.53	-0.9	-0.14	0.23	0.02	0.943432	0.688792	0.332948	0.601724	0.309584	0.0891771	0.796462	0.666716	0.972624	1	1	0.997964	1	1	1	1	1	0.996587
ENSG00000167107.13	ACSF2	0	12	6.34977	5.45879	7.98537	6.40661	4.30008	5.18138	4.48729	5.52918	11.7219	14.9202	12.2355	13.0023	-0.02	0.45	0.26	0.3	0.07	0.31	0.18	0.15	0.38	0.955937	0.215962	0.483322	0.416488	0.851545	0.408325	0.628862	0.67297	0.301189	1	1	1	1	1	1	1	1	0.748998
ENSG00000176715.17	ACSF3	0	12	9.07047	7.13507	8.43281	9.04967	9.45839	8.75601	9.41544	9.66047	11.2086	12.1709	11.1334	11.4455	-0.23	0	0.25	-0.08	-0.02	-0.02	-0.06	0.08	0.27	0.628345	0.994964	0.602158	0.860564	0.970125	0.967184	0.902374	0.864458	0.569095	1	1	1	1	1	1	1	1	0.911701
ENSG00000151726.15	ACSL1	0	12	17.1141	12.8043	14.1011	12.372	10.1892	9.85147	10.2676	10.8737	13.3136	12.8832	13.1785	8.56629	-0.21	-0.16	-0.24	-0.02	0.02	0.02	-0.22	0.05	-0.3	0.683281	0.760095	0.645125	0.965178	0.968335	0.96692	0.672997	0.916987	0.557245	1	1	1	1	1	1	1	1	0.907973
ENSG00000123983.14	ACSL3	0	12	100.906	124.466	135.256	175.052	53.7536	52.1862	52.8788	56.1215	45.9998	39.3777	39.1733	21.8481	0.52	0.54	1.05	-0.02	-0.04	0	-0.37	-0.15	-0.87	0.206645	0.183265	0.0101207	0.957553	0.928127	0.992342	0.363682	0.711853	0.0330942	1	1	0.298449	1	1	1	1	1	0.27173
ENSG00000068366.20	ACSL4	0	12	19.6296	18.3576	19.435	18.8219	27.1599	28.0734	26.8605	29.5408	14.5153	12.9498	12.666	7.34409	0.1	0.11	0.2	0.07	-0.02	0.06	-0.35	-0.14	-0.64	0.807177	0.790864	0.622845	0.85408	0.955921	0.881053	0.376454	0.726016	0.104527	1	1	1	1	1	1	1	1	0.483508
ENSG00000131069.20	ACSS2	0	12	21.7869	22.1662	21.5708	16.0631	11.3079	10.7437	10.017	11.1113	8.58607	8.54997	7.45498	5.69339	0.15	0.09	-0.18	-0.04	-0.17	-0.1	-0.2	-0.13	-0.3	0.767115	0.847261	0.711128	0.934393	0.722274	0.841061	0.679151	0.795615	0.535965	1	1	1	1	1	1	1	1	0.896944
ENSG00000075624.17	ACTB	0	12	688.819	666.741	390.023	336.446	746.83	699.481	680.278	718.135	393.47	403.911	322.111	331.029	0.17	-0.7	-0.79	-0.08	-0.13	-0.13	-0.15	-0.25	-0.02	0.638762	0.0594978	0.0336396	0.833551	0.718848	0.720795	0.679082	0.494124	0.956642	1	1	0.522775	1	1	1	1	1	0.994987
ENSG00000184009.12	ACTG1	0	12	760.197	712.459	538.188	494.828	783.914	713.003	645.846	648.53	1181.96	1356.76	1461.09	1389.44	0.12	-0.37	-0.37	-0.11	-0.27	-0.33	0.01	0.4	0.55	0.775425	0.368774	0.371529	0.793771	0.515385	0.423215	0.98556	0.338127	0.183249	1	1	1	1	1	1	1	1	0.619493
ENSG00000136518.17	ACTL6A	0	12	24.3284	19.0453	20.1098	16.0206	33.5421	29.7552	28.1632	28.1802	30.5385	28.652	23.4606	16.6552	-0.17	-0.16	-0.36	-0.16	-0.26	-0.32	-0.25	-0.33	-0.67	0.668666	0.70153	0.372965	0.68694	0.523927	0.435722	0.536831	0.410124	0.100887	1	1	1	1	1	1	1	1	0.473748
ENSG00000072110.15	ACTN1	0	12	53.4374	42.5917	44.3529	42.772	76.7709	75.5437	73.9973	81.6739	24.9985	29.456	29.5956	34.2741	-0.16	-0.15	-0.07	0.01	-0.06	0.03	0.06	0.32	0.69	0.47372	0.484976	0.744471	0.963683	0.777833	0.881153	0.796021	0.14662	0.0016983	1	1	1	1	1	1	1	1	0.0556562
ENSG00000130402.13	ACTN4	0	12	139.761	113.144	102.287	90.4262	83.7975	71.4197	69.1597	64.0963	14.6707	17.796	20.395	20.236	-0.1	-0.33	-0.38	-0.21	-0.28	-0.44	0.08	0.55	0.73	0.700798	0.215555	0.14959	0.435566	0.290437	0.099011	0.771756	0.0397625	0.00607831	1	1	0.853688	1	1	1	1	0.737115	0.109473
ENSG00000131966.14	ACTR10	0	12	19.5122	18.3486	16.5087	16.3148	17.179	21.3153	18.0048	22.1821	34.7711	34.1194	28.6941	19.4833	0.06	-0.13	-0.01	0.34	0.07	0.28	-0.17	-0.19	-0.59	0.817404	0.652793	0.979197	0.226519	0.79354	0.325261	0.541361	0.507335	0.033454	1	1	1	1	1	1	1	1	0.273189
ENSG00000138107.13	ACTR1A	0	12	24.1232	21.8194	24.1252	25.1536	19.3447	21.0966	20.3184	25.7567	23.6636	23.9092	25.5206	22.3383	0.04	0.12	0.31	0.14	0.06	0.34	-0.17	0.19	0.2	0.827808	0.476193	0.0651167	0.398029	0.701811	0.047329	0.318088	0.263373	0.236534	1	1	0.678215	1	1	1	1	1	0.688409
ENSG00000115073.8	ACTR1B	0	12	10.8465	10.0872	11.3137	11.1367	15.3428	15.3856	14.0878	16.9251	23.212	22.5492	21.3415	16.5809	0.05	0.18	0.29	0.02	-0.13	0.07	-0.21	-0.03	-0.24	0.821783	0.414527	0.185884	0.92641	0.548536	0.741174	0.326515	0.877335	0.272899	1	1	0.891429	1	1	1	1	1	0.724543
ENSG00000138071.14	ACTR2	0	12	68.592	61.0577	66.4454	58.6346	61.4405	66.2352	55.8432	69.0722	88.3741	90.3249	76.1241	60.656	0	0.07	0.02	0.13	-0.14	0.1	-0.13	-0.16	-0.29	0.992373	0.710933	0.8973	0.498512	0.479869	0.600006	0.496322	0.395217	0.131935	1	1	1	1	1	1	1	1	0.537149
ENSG00000115091.12	ACTR3	0	12	62.6649	51.3094	45.5496	39.9481	92.8963	83.8454	77.5387	77.8311	121.647	118.316	96.779	74.0375	-0.09	-0.34	-0.41	-0.12	-0.26	-0.32	-0.23	-0.27	-0.35	0.857127	0.48695	0.403797	0.804541	0.600012	0.510392	0.642976	0.581857	0.472219	1	1	1	1	1	1	1	1	0.871505
ENSG00000133627.18	ACTR3B	0	12	7.16002	6.1318	6.70366	8.12406	4.4211	3.82651	3.93223	3.28512	9.82013	11.4228	10.8524	8.31679	-0.06	0.02	0.44	-0.18	-0.19	-0.47	0.04	0.21	0.15	0.906754	0.970509	0.424687	0.738479	0.729948	0.397376	0.947309	0.694397	0.777817	1	1	1	1	1	1	1	1	0.960843
ENSG00000101442.10	ACTR5	0	12	2.77501	2.16376	2.72675	2.61399	1.58554	1.66532	1.51175	1.70257	2.75903	2.83686	2.72692	2.16086	-0.2	0.09	0.16	0.09	-0.08	0.09	-0.15	0.05	-0.01	0.552737	0.787551	0.637226	0.782034	0.811047	0.793151	0.659026	0.875314	0.967402	1	1	1	1	1	1	1	1	0.995824
ENSG00000113812.14	ACTR8	0	12	14.4416	11.786	14.705	13.529	10.625	10.1668	9.90088	10.1397	15.6219	14.597	16.2591	11.7704	-0.11	0.15	0.16	-0.05	-0.1	-0.14	-0.26	0.14	-0.15	0.638659	0.516288	0.492415	0.838066	0.645679	0.553214	0.248991	0.547859	0.496002	1	1	1	1	1	1	1	1	0.880918
ENSG00000115170.15	ACVR1	0	12	4.30048	3.74598	3.42052	3.10283	8.25017	7.61445	8.04032	6.48814	2.56588	2.52973	2.51082	2.03354	-0.03	-0.22	-0.22	-0.08	-0.04	-0.4	-0.18	0.08	-0.03	0.903138	0.397165	0.381807	0.741059	0.876898	0.119585	0.490087	0.741622	0.916201	1	1	1	1	1	1	1	1	0.989252
ENSG00000135503.13	ACVR1B	0	12	6.0187	5.29814	5.63404	5.57194	3.50138	3.83109	3.60388	3.95046	3.47262	3.86043	3.23044	2.82916	0.03	0.03	0.14	0.16	0.03	0.09	-0.02	0.01	0.04	0.94664	0.941485	0.741308	0.701239	0.936715	0.830376	0.966947	0.989444	0.929973	1	1	1	1	1	1	1	1	0.991328
ENSG00000121989.15	ACVR2A	0	12	4.84364	3.91016	4.19421	4.2096	5.78138	5.74246	5.45416	5.86251	3.61771	3.54346	3.02183	2.42839	-0.12	-0.09	0.04	0.01	-0.1	-0.03	-0.17	-0.19	-0.36	0.721445	0.787586	0.893843	0.974184	0.768819	0.932102	0.61222	0.556157	0.265773	1	1	1	1	1	1	1	1	0.717052
ENSG00000114739.14	ACVR2B	0	12	6.24439	5.71694	4.7928	4.20886	2.38765	1.93775	2.04602	1.81057	2.02923	2.22699	2.0757	1.55074	0.05	-0.26	-0.32	-0.28	-0.23	-0.44	-0.04	0.11	-0.09	0.757745	0.0922817	0.0399303	0.0795256	0.139789	0.00695703	0.784208	0.473517	0.578011	1	1	0.561843	1	1	0.517227	1	1	0.914227
ENSG00000243989.9	ACY1	0	12	21.2195	23.5408	33.9753	40.4069	18.2146	22.3662	20.5341	25.0154	16.1407	17.1961	26.3465	22.9921	0.29	0.79	1.19	0.31	0.17	0.39	-0.05	0.82	0.65	0.690371	0.276049	0.101222	0.6673	0.81411	0.590263	0.942492	0.258496	0.373867	1	1	0.773361	1	1	1	1	1	0.814456
ENSG00000119640.9	ACYP1	0	12	15.5092	12.2365	11.1797	9.47664	6.4237	6.59812	6.64227	6.90858	22.2527	21.2676	19.192	11.907	-0.12	-0.35	-0.47	0.05	0.03	0.03	-0.27	-0.2	-0.6	0.840375	0.555565	0.422737	0.938396	0.953798	0.958587	0.650589	0.729229	0.303131	1	1	1	1	1	1	1	1	0.751172
ENSG00000170634.13	ACYP2	0	12	4.81567	3.78456	4.03405	3.94601	5.25529	5.8434	5.91997	6.69389	1.8758	2.26153	1.50421	1.29398	-0.19	-0.14	-0.03	0.19	0.18	0.31	0.14	-0.23	-0.27	0.485113	0.603194	0.897215	0.480996	0.50297	0.275205	0.610606	0.428854	0.347293	1	1	1	1	1	1	1	1	0.793658
ENSG00000196839.13	ADA	0	12	8.46976	9.00681	11.5701	11.7376	5.00098	5.57825	4.99078	5.97473	12.4787	14.0167	16.7122	16.9437	0.3	0.58	0.72	0.18	-0.01	0.21	0	0.54	0.66	0.51111	0.20433	0.113311	0.694097	0.986898	0.65399	0.99178	0.237168	0.143614	1	1	0.795218	1	1	1	1	1	0.557993
ENSG00000168803.16	ADAL	0	12	6.47163	5.56603	5.16616	5.49264	3.52041	3.45199	3.16114	3.29204	5.64032	6.1435	5.73701	3.42515	-0.07	-0.21	0.01	0	-0.16	-0.14	-0.02	0.12	-0.48	0.826903	0.498038	0.961891	0.99136	0.610707	0.653238	0.942487	0.694808	0.123555	1	1	1	1	1	1	1	1	0.519121
ENSG00000137845.15	ADAM10	0	12	63.248	54.3767	49.0219	54.1891	50.2418	51.9366	44.664	52.595	31.7006	35.1665	29.3717	23.1377	-0.01	-0.25	0.03	0.07	-0.17	0	-0.03	-0.05	-0.17	0.960393	0.368947	0.904836	0.790383	0.539804	0.997889	0.920613	0.843027	0.535514	1	1	1	1	1	1	1	1	0.896789
ENSG00000143537.14	ADAM15	0	12	54.0792	49.497	55.2272	54.3347	24.6749	28.8535	28.1783	32.255	29.8068	32.4757	28.0968	23.3125	0.08	0.15	0.26	0.25	0.18	0.34	-0.08	-0.04	-0.02	0.842049	0.715924	0.540467	0.551076	0.670762	0.417973	0.854193	0.925295	0.95416	1	1	1	1	1	1	1	1	0.994608
ENSG00000151694.14	ADAM17	0	12	30.8257	24.447	24.0843	19.5437	25.2291	23.241	21.9604	22.104	28.0014	28.5686	25.7564	20.8107	-0.11	-0.23	-0.42	-0.09	-0.21	-0.25	-0.12	-0.03	-0.18	0.782241	0.568991	0.307286	0.827916	0.613407	0.54583	0.763833	0.939494	0.651001	1	1	0.985059	1	1	1	1	1	0.933184
ENSG00000008277.14	ADAM22	0	12	2.51763	2.68535	2.50559	1.85563	2.47881	2.06458	2.02433	1.27205	3.67034	3.69108	2.61703	2.18393	0.27	0.11	-0.18	-0.22	-0.27	-1	-0.19	-0.44	-0.37	0.653925	0.848639	0.756185	0.710866	0.643728	0.0919944	0.747062	0.452719	0.526672	1	1	1	1	1	1	1	1	0.893371
ENSG00000114948.13	ADAM23	0	12	2.70356	3.91239	4.55103	5.32886	4.7483	5.39513	4.87684	5.77655	2.64397	3.70679	3.75808	4.43927	0.64	0.86	1.25	0.22	0.05	0.22	0.31	0.62	1.01	0.285881	0.152578	0.0383438	0.715491	0.93711	0.717137	0.606971	0.302052	0.0921301	1	1	0.55298	1	1	1	1	1	0.453876
ENSG00000197140.15	ADAM32	0	12	3.09246	3.38525	2.83507	1.95504	2.9444	2.57043	3.25421	2.32747	2.88554	3.50621	1.87995	2.04426	0.25	-0.01	-0.41	-0.16	0.12	-0.41	0.13	-0.58	-0.23	0.546571	0.981236	0.32323	0.700245	0.771181	0.332141	0.761779	0.170264	0.583704	1	1	0.991366	1	1	1	1	1	0.915386
ENSG00000168615.13	ADAM9	0	12	29.1839	26.3546	20.0306	15.4446	72.3755	74.9551	68.2777	70.4591	43.3164	39.4775	36.5369	30.1933	0.06	-0.42	-0.67	0.07	-0.09	-0.1	-0.28	-0.16	-0.34	0.899266	0.356156	0.140326	0.873097	0.842465	0.828687	0.541825	0.734246	0.453907	1	1	0.841398	1	1	1	1	1	0.863705
ENSG00000156218.13	ADAMTSL3	0	12	2.25437	2.2122	2.05681	1.64888	1.6063	1.72841	2.07028	1.3674	2.57729	3.76659	2.37014	2.72717	0.11	-0.02	-0.21	0.14	0.35	-0.25	0.37	-0.04	0.34	0.66194	0.940595	0.42932	0.590517	0.180406	0.360883	0.15967	0.875423	0.191526	1	1	1	1	1	1	1	1	0.632157
ENSG00000185761.11	ADAMTSL5	0	12	1.73363	1.78721	3.05612	3.09308	3.82556	3.91904	4.50401	5.58828	1.58319	1.3459	2.58446	2.82437	0.2	0.93	1.09	0.05	0.23	0.48	-0.37	0.79	0.88	0.850969	0.390814	0.317344	0.96629	0.830499	0.661005	0.734814	0.464668	0.417402	1	1	0.988503	1	1	1	1	1	0.84359
ENSG00000160710.17	ADAR	0	12	34.5518	29.9644	32.6092	31.7519	25.1174	26.3623	24.766	28.1263	47.8723	49.9491	51.9134	40.3688	-0.04	0.03	0.13	0.09	-0.03	0.1	-0.12	0.2	0.07	0.857163	0.875064	0.536974	0.662767	0.878472	0.646103	0.566305	0.329927	0.735236	1	1	1	1	1	1	1	1	0.955572
ENSG00000197381.16	ADARB1	0	12	6.3099	5.9658	4.55608	3.29357	7.49537	6.62963	8.38044	6.43869	2.37488	2.54054	2.71831	2.55092	0.11	-0.35	-0.7	-0.15	0.13	-0.28	-0.09	0.26	0.38	0.749088	0.310408	0.0430809	0.668489	0.718931	0.423579	0.807418	0.462681	0.272887	1	1	0.579353	1	1	1	1	1	0.724543
ENSG00000065457.10	ADAT1	0	12	19.865	19.6431	23.8862	26.7179	22.0043	22.8093	24.1711	23.9205	21.1264	23.18	21.4846	18.2887	0.08	0.37	0.69	0.06	0.12	0.06	-0.02	0.1	0.05	0.902386	0.572808	0.296397	0.922372	0.852614	0.931195	0.976199	0.876337	0.937336	1	1	0.983993	1	1	1	1	1	0.99303
ENSG00000189007.16	ADAT2	0	12	4.37274	3.59289	5.20489	4.35185	3.18322	3.08255	3.37822	3.35034	3.6368	3.76803	3.17378	2.43433	-0.11	0.37	0.24	-0.02	0.05	0.02	-0.11	-0.14	-0.36	0.689544	0.165991	0.37101	0.931851	0.866548	0.950608	0.686749	0.592396	0.183824	1	1	1	1	1	1	1	1	0.620082
ENSG00000063761.16	ADCK1	0	12	1.78579	1.53114	1.6376	1.56827	3.52114	3.50922	3.23941	2.69982	4.16946	5.3136	2.98387	2.61801	-0.11	-0.02	0.06	0.03	-0.11	-0.4	0.2	-0.43	-0.41	0.866645	0.970633	0.924705	0.958217	0.863101	0.549413	0.768684	0.516202	0.539021	1	1	1	1	1	1	1	1	0.897972
ENSG00000133597.11	ADCK2	0	12	8.51992	7.33463	8.18084	8.8256	8.16826	8.41433	7.34538	8.80977	11.8995	10.5296	11.6096	7.39576	-0.07	0.06	0.3	0.05	-0.16	0.04	-0.37	0.06	-0.26	0.916962	0.933667	0.649747	0.934919	0.810607	0.955406	0.57412	0.925515	0.694288	1	1	1	1	1	1	1	1	0.944603
ENSG00000173137.12	ADCK5	0	12	1.9105	1.32532	2.00946	2.03509	3.09969	3.75206	3.43592	4.77407	2.63566	3.0562	3.45632	3.14254	-0.4	0.18	0.34	0.3	0.13	0.55	0.03	0.52	0.5	0.37546	0.683742	0.44571	0.508341	0.772152	0.229681	0.95536	0.246494	0.265431	1	1	1	1	1	1	1	1	0.716944
ENSG00000138031.14	ADCY3	0	12	14.4675	11.4677	13.045	10.0297	15.5762	12.0352	11.1746	11.9494	18.9526	20.5504	16.7882	14.1703	-0.19	-0.03	-0.28	-0.35	-0.48	-0.45	-0.08	-0.14	-0.1	0.621156	0.928466	0.469254	0.367792	0.216482	0.241047	0.840324	0.726124	0.791304	1	1	1	1	1	1	1	1	0.964774
ENSG00000121281.13	ADCY7	0	12	9.2866	7.67901	11.8734	9.90977	7.25427	7.04822	6.66417	6.87116	6.88827	6.885	6.71353	6.69509	-0.1	0.47	0.34	-0.02	-0.12	-0.13	-0.16	0.02	0.11	0.847642	0.343635	0.492057	0.967246	0.803931	0.7948	0.748355	0.972276	0.819887	1	1	1	1	1	1	1	1	0.970548
ENSG00000162104.10	ADCY9	0	12	3.69001	3.82208	3.96451	3.58264	2.57418	2.53134	2.41718	2.12802	4.96579	5.69497	4.4412	5.34396	0.23	0.23	0.21	0	-0.1	-0.32	0.01	-0.11	0.39	0.285225	0.298369	0.326812	0.988027	0.637091	0.155887	0.970343	0.603985	0.0747346	1	1	0.993868	1	1	1	1	1	0.408279
ENSG00000087274.17	ADD1	0	12	22.2646	18.1692	18.658	16.5591	19.1296	20.3137	19.8789	20.7755	24.0275	25.5797	24.6336	21.7534	-0.13	-0.14	-0.18	0.11	0.05	0.05	-0.08	0.12	0.09	0.563605	0.547587	0.438337	0.644733	0.844324	0.812276	0.729162	0.595819	0.688733	1	1	1	1	1	1	1	1	0.942735
ENSG00000075340.23	ADD2	0	12	6.9895	5.64654	6.4631	5.47715	2.78099	2.30132	2.31923	2.45641	11.5972	12.2735	8.72013	7.80295	-0.07	0.02	-0.11	-0.23	-0.29	-0.17	-0.14	-0.38	-0.19	0.934276	0.984031	0.894109	0.787021	0.729309	0.834495	0.869533	0.651012	0.817058	1	1	1	1	1	1	1	1	0.970389
ENSG00000148700.15	ADD3	0	12	38.8054	34.8117	37.3003	40.662	25.9173	25.7507	23.4946	24.5478	37.3711	37.9602	34.1077	27.9264	0	0.06	0.32	0.02	-0.14	-0.14	-0.11	-0.07	-0.38	0.997474	0.956015	0.757882	0.985409	0.893195	0.893614	0.912388	0.946715	0.713182	1	1	1	1	1	1	1	1	0.948885
ENSG00000152990.14	ADGRA3	0	12	15.0872	14.772	14.1403	13.0715	20.4185	18.8635	20.3743	19.6689	12.6732	14.6565	14.2305	11.1642	0.12	0.02	0.05	-0.08	-0.01	-0.12	0.02	0.25	0.17	0.757989	0.957831	0.90609	0.834998	0.983748	0.760206	0.952719	0.531683	0.671837	1	1	1	1	1	1	1	1	0.93773
ENSG00000121753.12	ADGRB2	0	12	3.95147	3.73938	4.06396	3.68774	1.54676	1.76119	1.6033	1.92921	5.19245	6.73847	6.67843	8.3587	0.15	0.17	0.14	0.21	0.04	0.27	0.2	0.45	0.9	0.778456	0.750487	0.785889	0.6959	0.945931	0.61492	0.709312	0.398916	0.0921259	1	1	1	1	1	1	1	1	0.453876
ENSG00000112414.15	ADGRG6	0	12	12.5335	11.8841	10.3313	8.36822	3.93768	4.26446	4.59754	4.34809	3.91252	6.11365	3.68183	3.32771	0.12	-0.16	-0.33	0.13	0.18	0.09	0.52	-0.02	-0.25	0.941943	0.925886	0.844434	0.938148	0.916756	0.955813	0.760892	0.990676	0.884477	1	1	1	1	1	1	1	1	0.984492
ENSG00000072071.16	ADGRL1	0	12	6.29647	6.08848	6.58239	7.34756	3.6701	2.87308	3.05441	2.70827	15.2401	16.2858	15.0025	16.0647	0.13	0.18	0.48	-0.33	-0.28	-0.48	-0.08	0.06	0.28	0.689682	0.56367	0.130773	0.299405	0.379569	0.136569	0.799127	0.849045	0.37065	1	1	0.828948	1	1	1	1	1	0.812263
ENSG00000117114.20	ADGRL2	0	12	6.23323	6.27591	5.75436	5.3531	12.4021	13.6174	14.2119	17.4418	7.34574	8.89971	7.57419	6.96564	0.14	0	0.04	0.16	0.18	0.43	0.11	0.05	0.19	0.798213	0.994085	0.936772	0.770003	0.736637	0.424453	0.830471	0.922335	0.722061	1	1	1	1	1	1	1	1	0.951187
ENSG00000164199.18	ADGRV1	0	12	7.88861	7.8424	6.06023	5.02812	1.81521	1.68709	2.16236	1.68927	6.06012	7.74605	3.74056	4.91071	0.14	-0.27	-0.4	-0.08	0.22	-0.16	0.22	-0.64	-0.18	0.834433	0.689609	0.55197	0.909746	0.743044	0.816308	0.739913	0.341456	0.789891	1	1	1	1	1	1	1	1	0.964343
ENSG00000197894.11	ADH5	0	12	53.2379	48.4971	52.3248	50.4452	59.8611	64.2207	59.0396	64.4629	83.3886	75.9953	86.7331	62.5504	0.04	0.1	0.17	0.12	-0.02	0.05	-0.3	0.13	-0.17	0.842697	0.669005	0.441453	0.590107	0.938764	0.828178	0.181873	0.549603	0.452038	1	1	1	1	1	1	1	1	0.86281
ENSG00000182551.14	ADI1	0	12	16.9006	15.7453	18.5704	17.6223	29.6836	28.8617	29.562	31.0004	24.0281	24.6791	35.8313	23.1746	0.06	0.25	0.32	-0.02	-0.02	0	-0.14	0.69	0.23	0.749205	0.201098	0.11167	0.935354	0.934752	0.983269	0.492744	0.00049949	0.248129	1	1	0.793901	1	1	1	1	0.101368	0.699971
ENSG00000159346.13	ADIPOR1	0	12	50.3514	43.5589	48.5208	48.986	32.7443	37.1883	33.2205	40.7885	35.5893	35.9517	35.7162	28.369	-0.03	0.07	0.21	0.21	0.02	0.26	-0.16	0.08	-0.02	0.889217	0.744365	0.297248	0.30817	0.92919	0.213749	0.419308	0.703688	0.917469	1	1	0.984486	1	1	1	1	1	0.989252
ENSG00000006831.10	ADIPOR2	0	12	19.6836	17.5541	17.6166	16.5163	13.9043	14.43	14.7124	15.8943	17.4074	17.2388	15.7164	12.0086	0.02	-0.04	-0.01	0.07	0.07	0.13	-0.2	-0.08	-0.25	0.927681	0.825062	0.975816	0.703583	0.703557	0.482584	0.280609	0.650694	0.178592	1	1	1	1	1	1	1	1	0.612746
ENSG00000156110.15	ADK	0	12	18.7438	16.8183	14.4035	14.4495	18.8655	17.407	17.2643	15.5737	20.1811	18.9464	8.69757	6.77508	0.07	-0.25	-0.13	-0.08	-0.13	-0.33	-0.24	-1.24	-1.31	0.908305	0.653073	0.819566	0.887345	0.814685	0.55927	0.672656	0.0282596	0.0209147	1	1	1	1	1	1	1	0.660586	0.216396
ENSG00000224420.3	ADM5	0	12	1.48264	1.47464	2.04449	1.44332	1.7243	1.25987	1.18384	1.34381	1.31069	1.5866	1.20908	1.20265	0.09	0.57	0.21	-0.42	-0.53	-0.42	0.08	-0.06	0.26	0.905617	0.428235	0.771006	0.56406	0.460059	0.572455	0.907798	0.936759	0.719177	1	1	1	1	1	1	1	1	0.950529
ENSG00000101126.18	ADNP	0	12	16.1441	12.8163	12.6368	13.4152	7.32458	7.40523	9.85523	8.28717	16.1198	16.3341	13.1539	10.865	-0.16	-0.24	-0.02	0.03	0.39	0.11	-0.14	-0.24	-0.32	0.502154	0.314008	0.93546	0.891082	0.0965866	0.644236	0.539523	0.30042	0.16643	1	1	1	1	1	1	1	1	0.594125
ENSG00000101544.9	ADNP2	0	12	9.74939	8.56089	8.24354	8.2418	12.2123	13.1133	13.3148	12.5713	13.2826	15.1647	13.1115	10.1683	0.01	-0.12	0.01	0.14	0.11	0	0.05	0.05	-0.22	0.985989	0.815635	0.989324	0.789444	0.833204	0.993583	0.927357	0.915398	0.673159	1	1	1	1	1	1	1	1	0.93796
ENSG00000181915.5	ADO	0	12	9.14735	8.01276	9.57807	9.17425	11.7304	12.4803	11.8024	13.5368	12.1285	10.8405	9.32862	6.40755	-0.02	0.18	0.25	0.11	0.01	0.15	-0.33	-0.34	-0.67	0.937308	0.403267	0.258031	0.622711	0.977654	0.511591	0.13916	0.128429	0.00250145	1	1	0.963568	1	1	1	1	1	0.0677008
ENSG00000170425.3	ADORA2B	0	12	10.2162	8.28689	12.3641	10.8683	3.99014	3.46126	3.93422	2.6736	4.08886	4.44179	5.20254	4.50546	-0.15	0.39	0.33	-0.19	-0.04	-0.64	-0.08	0.46	0.59	0.85091	0.626883	0.68443	0.814839	0.964027	0.433795	0.923028	0.570984	0.466967	1	1	1	1	1	1	1	1	0.869572
ENSG00000159322.17	ADPGK	0	12	17.6087	15.0455	16.8421	17.4317	17.318	18.494	17.5856	20.1024	22.4385	22.6817	22.6204	18.7789	-0.06	0.05	0.24	0.12	0.01	0.16	-0.16	0.09	0.01	0.682342	0.738296	0.124701	0.446293	0.939053	0.312424	0.297619	0.573157	0.927086	1	1	0.819288	1	1	1	1	1	0.991076
ENSG00000170222.12	ADPRM	0	12	11.6636	10.1188	13.2448	13.0748	5.45989	5.31777	4.88302	4.9667	7.15236	5.71684	4.17137	3.00769	-0.01	0.3	0.41	-0.01	-0.16	-0.16	-0.46	-0.72	-1.06	0.981427	0.499647	0.364959	0.987812	0.716652	0.733882	0.309701	0.109909	0.0189629	1	1	1	1	1	1	1	0.985865	0.206401
ENSG00000116863.11	ADPRS	0	12	13.3681	8.559	13.4459	13.1024	12.9033	13.7722	12.3903	13.5223	14.3939	14.3363	17.1452	14.5957	-0.47	0.13	0.21	0.12	-0.06	0.01	-0.18	0.34	0.24	0.1577	0.698798	0.524677	0.725611	0.852631	0.977399	0.582739	0.304324	0.464148	1	1	1	1	1	1	1	1	0.868549
ENSG00000130706.13	ADRM1	0	12	62.0836	53.3625	61.6874	63.9184	36.0027	37.3396	34.7941	39.0217	47.0794	48.4418	50.4042	47.5319	0	0.12	0.29	0.07	-0.06	0.07	-0.13	0.18	0.25	0.998815	0.783041	0.494912	0.861758	0.894491	0.875609	0.764896	0.675076	0.56065	1	1	1	1	1	1	1	1	0.909313
ENSG00000239900.13	ADSL	0	12	48.6947	41.318	43.8194	42.5824	55.5961	51.2184	48.5141	50.5621	83.9614	85.0453	80.1866	64.8582	-0.1	-0.04	0.06	-0.09	-0.2	-0.2	-0.16	0.01	-0.05	0.804436	0.918418	0.878069	0.821711	0.62942	0.626067	0.693046	0.981237	0.892984	1	1	1	1	1	1	1	1	0.984666
ENSG00000035687.10	ADSS2	0	12	31.2618	27.5936	27.4602	26.1449	22.08	20.057	18.2249	17.4165	29.8823	30.3575	29.4762	20.1188	-0.02	-0.07	0	-0.12	-0.28	-0.41	-0.14	0.06	-0.3	0.915478	0.756776	0.989302	0.610132	0.231803	0.0843426	0.543931	0.807727	0.197857	1	1	1	1	1	1	1	1	0.638872
ENSG00000139154.16	AEBP2	0	12	14.2052	12.2319	11.8303	12.2394	11.861	11.7002	11.7556	11.4485	24.1354	27.362	22.1771	24.202	-0.02	-0.14	0.03	0.01	-0.03	-0.1	0.03	-0.06	0.14	0.967402	0.810508	0.957167	0.986543	0.959971	0.86511	0.954942	0.923661	0.815658	1	1	1	1	1	1	1	1	0.969822
ENSG00000181026.15	AEN	0	12	48.649	49.8542	59.8056	69.7482	36.1893	38.2965	37.2425	44.3305	27.0022	32.5255	37.3281	35.5665	0.26	0.42	0.76	0.11	0.02	0.25	0.11	0.55	0.63	0.591506	0.372348	0.108304	0.816565	0.958241	0.601208	0.814687	0.249679	0.183631	1	1	0.787576	1	1	1	1	1	0.619848
ENSG00000212371.1	AF111168.1	0	12	4.68236	5.80047	4.42578	3.3427	3.6047	1.52404	2.93879	5.13691	1.61797	1.99839	1.47712	2.53399	0.56	0.06	-0.22	-1.19	-0.26	0.36	0.25	-0.06	0.9	0.565444	0.94882	0.821206	0.250464	0.795601	0.741762	0.81522	0.957567	0.393317	1	1	1	1	1	1	1	NA	NA
ENSG00000251136.9	AF117829.1	0	12	33.3069	36.4211	36.4328	31.3483	20.8368	18.8002	20.6397	19.3166	12.8969	13.1226	8.52448	7.37924	0.24	0.24	0.17	-0.11	-0.03	-0.17	-0.14	-0.53	-0.49	0.672714	0.672416	0.763769	0.84994	0.953516	0.767564	0.808049	0.351723	0.390303	1	1	1	1	1	1	1	1	0.825221
ENSG00000196526.10	AFAP1	0	12	21.1217	20.4588	18.3249	17.7854	9.07624	8.29999	7.88396	6.43407	4.45319	4.19555	3.00562	3.29575	0.12	-0.09	0.01	-0.09	-0.19	-0.56	-0.26	-0.54	-0.3	0.840327	0.883307	0.983113	0.878779	0.749767	0.354214	0.673059	0.370576	0.625461	1	1	1	1	1	1	1	1	0.926763
ENSG00000130396.20	AFDN	0	12	12.6031	10.0626	9.10704	7.29165	26.5878	23.555	24.0282	21.504	6.8771	7.91933	6.78531	4.87478	-0.13	-0.35	-0.55	-0.14	-0.17	-0.36	0.03	0.08	-0.2	0.69709	0.292975	0.095873	0.663743	0.616849	0.279909	0.937163	0.807012	0.541946	1	1	0.761792	1	1	1	1	1	0.899266
ENSG00000172493.22	AFF1	0	12	3.33056	3.62737	3.53021	3.31463	6.18201	6.60595	8.20558	8.09225	2.60927	3.18212	2.84925	2.43403	0.35	0.21	0.24	0.12	0.37	0.33	0.11	0.21	0.22	0.480462	0.671348	0.625964	0.803813	0.457285	0.505148	0.819494	0.67995	0.657576	1	1	1	1	1	1	1	1	0.935097
ENSG00000072364.13	AFF4	0	12	20.3622	18.8473	22.3941	21.4697	14.3038	15.5684	16.453	16.5011	25.3376	26.5613	24.5707	21.9269	0.07	0.26	0.33	0.15	0.19	0.15	-0.08	0.04	0.01	0.822014	0.420672	0.306464	0.645275	0.546358	0.649735	0.794098	0.904391	0.97143	1	1	0.984887	1	1	1	1	1	0.996414
ENSG00000135537.17	AFG1L	0	12	2.80826	2.76174	2.02888	2.60186	2.51177	2.347	2.10528	1.77155	4.011	3.8735	2.38968	1.88662	0.15	-0.35	0.15	-0.08	-0.25	-0.54	-0.2	-0.68	-0.78	0.657811	0.289454	0.654121	0.80821	0.44491	0.117732	0.542898	0.0382693	0.0173532	1	1	1	1	1	1	1	0.724981	0.197882
ENSG00000223959.8	AFG3L1P	0	12	5.71716	4.48501	5.58815	4.20124	5.50446	5.09265	5.02101	5.05599	9.26559	11.7802	8.69887	7.44868	-0.23	0.08	-0.2	-0.09	-0.14	-0.18	0.16	-0.01	0.02	0.564639	0.842613	0.616468	0.823651	0.714198	0.650733	0.681297	0.988312	0.95821	1	1	1	1	1	1	1	1	0.995162
ENSG00000141385.10	AFG3L2	0	12	25.7093	21.9621	24.6025	23.6607	26.0059	24.228	23.0722	21.0602	32.907	33.6675	30.0316	21.948	-0.05	0.05	0.13	-0.07	-0.18	-0.35	-0.11	-0.07	-0.44	0.924432	0.923208	0.819053	0.895299	0.757311	0.539501	0.846792	0.898126	0.434493	1	1	1	1	1	1	1	1	0.852757
ENSG00000183077.15	AFMID	0	12	16.8687	14.3783	14.964	14.0074	8.62172	8.76572	8.11017	9.17407	22.359	22.9503	21.2106	20.5542	-0.01	-0.05	-0.02	0.06	-0.09	0.06	-0.13	-0.02	0.16	0.98157	0.916225	0.964171	0.898023	0.826927	0.891329	0.769584	0.95851	0.720143	1	1	1	1	1	1	1	1	0.95096
ENSG00000119844.15	AFTPH	0	12	17.0673	15.3601	15.29	15.2229	8.18237	8.77712	7.91187	7.76039	9.34442	8.19399	8.71784	5.52493	0.05	-0.04	0.08	0.13	-0.06	-0.13	-0.37	-0.01	-0.46	0.874609	0.907095	0.792866	0.667865	0.841857	0.675707	0.229402	0.980896	0.131123	1	1	1	1	1	1	1	1	0.534672
ENSG00000038002.9	AGA	0	12	9.03637	7.40881	8.68971	8.13617	5.57576	6.53329	5.92785	7.25583	5.9121	5.27067	5.45253	2.30369	-0.16	0.05	0.1	0.24	0.08	0.32	-0.3	-0.01	-1.1	0.73004	0.907602	0.822884	0.588044	0.851084	0.476027	0.50894	0.977641	0.0147764	1	1	1	1	1	1	1	1	0.18066
ENSG00000157985.19	AGAP1	0	12	5.20749	4.62694	3.08605	2.86917	5.76136	5.23519	5.68814	5.10244	6.50279	6.08777	5.07851	5.63431	0.02	-0.64	-0.61	-0.11	-0.01	-0.24	-0.23	-0.27	-0.02	0.963681	0.136957	0.156965	0.805317	0.977015	0.577397	0.59053	0.527447	0.963448	1	1	0.864213	1	1	1	1	1	0.995162
ENSG00000133612.19	AGAP3	0	12	25.0377	22.5584	24.9105	25.1226	16.3111	16.1515	14.9769	15.7018	34.3453	42.6812	35.5766	33.5407	0.03	0.11	0.26	0.01	-0.13	-0.1	0.1	0.11	0.34	0.945762	0.819872	0.594709	0.984896	0.794916	0.831045	0.835066	0.815213	0.487537	1	1	1	1	1	1	1	1	0.87766
ENSG00000188234.13	AGAP4	0	12	3.88907	3.19767	4.18512	3.17261	5.12213	4.45375	5.36937	2.77909	5.41473	5.82998	4.30239	3.81057	-0.15	0.22	-0.04	-0.18	0.03	-0.9	-0.06	-0.27	-0.26	0.699814	0.569015	0.90894	0.637814	0.937503	0.0239752	0.879895	0.482419	0.500266	1	1	1	1	1	0.903633	1	1	0.883423
ENSG00000172650.14	AGAP5	0	12	1.8067	1.30993	1.76999	1.50278	1.833	1.96877	2.61623	1.9385	2.35829	3.59072	1.97876	2.16226	-0.34	0.08	-0.04	0.12	0.47	0.04	0.47	-0.14	0.2	0.467633	0.870716	0.92286	0.791849	0.308576	0.928219	0.309633	0.757731	0.660686	1	1	1	1	1	1	1	1	0.935822
ENSG00000204149.13	AGAP6	0	12	1.60262	1.44172	1.49815	2.10425	1.8229	1.70779	2.13619	1.75305	2.47947	2.896	2.2648	2.10554	0.01	0.02	0.64	-0.08	0.19	-0.06	0.07	-0.05	0.05	0.982241	0.941539	0.00653021	0.73782	0.415515	0.813703	0.770479	0.838386	0.836362	1	1	0.239759	1	1	1	1	1	0.972997
ENSG00000204172.12	AGAP9	0	12	1.64501	1.23384	1.56197	1.4311	1.80964	1.71987	2.22564	2.08893	1.89727	2.45939	1.96545	1.74176	-0.27	0.04	0.04	-0.06	0.25	0.1	0.19	0.13	0.15	0.387544	0.902164	0.88956	0.843989	0.414622	0.764926	0.536624	0.67653	0.637053	1	1	1	1	1	1	1	1	0.928779
ENSG00000084693.16	AGBL5	0	12	10.532	9.63103	10.7939	11.4792	9.90919	11.6314	10.8065	13.7508	17.1731	18.871	18.3763	15.559	0.06	0.16	0.37	0.25	0.12	0.42	-0.06	0.2	0.18	0.856171	0.659575	0.301902	0.476601	0.743831	0.236913	0.874467	0.571434	0.615822	1	1	0.984856	1	1	1	1	1	0.925575
ENSG00000173744.18	AGFG1	0	12	22.5584	18.668	19.0173	18.9829	26.2265	23.6885	25.5548	23.7871	29.3906	28.6943	22.9707	20.88	-0.08	-0.13	0	-0.12	-0.04	-0.19	-0.18	-0.29	-0.32	0.862735	0.789829	0.996515	0.805576	0.928406	0.690476	0.706659	0.542212	0.502763	1	1	1	1	1	1	1	1	0.884611
ENSG00000106351.13	AGFG2	0	12	2.5417	2.21665	1.81885	2.65358	3.11979	3.3613	2.80189	3.23275	11.5404	11.8908	11.3445	8.44318	-0.07	-0.37	0.32	0.13	-0.15	0.04	-0.13	0.07	-0.25	0.896891	0.517966	0.57986	0.822771	0.800554	0.952045	0.82063	0.906572	0.664334	1	1	1	1	1	1	1	1	0.936613
ENSG00000164252.13	AGGF1	0	12	7.85295	6.65732	7.30735	8.68448	10.7871	10.8779	9.48426	10.4112	5.5324	5.92598	6.42709	5.81479	-0.16	0	0.4	0.04	-0.18	-0.11	-0.02	0.28	0.05	0.943274	0.999708	0.855537	0.985191	0.935665	0.958684	0.991855	0.897011	0.980569	1	1	1	1	1	1	1	1	0.998303
ENSG00000006530.18	AGK	0	12	24.0551	20.7563	22.0761	20.1342	11.4673	8.90113	9.8484	8.79225	30.633	30.5943	27.1462	21.4211	-0.04	-0.01	-0.01	-0.35	-0.23	-0.45	-0.18	-0.12	-0.16	0.913438	0.987196	0.986652	0.390828	0.575079	0.263529	0.651383	0.771001	0.693446	1	1	1	1	1	1	1	1	0.944583
ENSG00000162688.17	AGL	0	12	5.06869	4.53668	4.91862	5.73955	5.62505	5.85052	5.99545	5.57079	4.39191	4.26444	3.25387	2.1174	-0.05	0.07	0.44	0.09	0.08	-0.07	-0.2	-0.39	-0.76	0.925017	0.897398	0.392029	0.865713	0.868564	0.890239	0.692942	0.44733	0.136372	1	1	1	1	1	1	1	1	0.545897
ENSG00000123908.12	AGO2	0	12	24.4768	21.9843	15.6767	16.8304	9.05485	6.75436	9.11612	9.04715	9.8912	12.5676	10.0523	9.94637	0.07	-0.52	-0.3	-0.39	-0.01	-0.08	0.15	0.08	0.29	0.866268	0.225092	0.488907	0.366125	0.972624	0.847461	0.732002	0.842341	0.503555	1	1	1	1	1	1	1	1	0.885155
ENSG00000126070.20	AGO3	0	12	16.7917	13.8339	13.288	14.1508	7.11738	6.83947	7.56547	7.71887	7.68236	7.86315	6.24607	6.30858	-0.06	-0.21	0	-0.04	0.08	0.05	-0.13	-0.23	-0.03	0.903613	0.647393	0.993352	0.93737	0.869951	0.907774	0.780298	0.612731	0.941388	1	1	1	1	1	1	1	1	0.99348
ENSG00000134698.11	AGO4	0	12	3.93003	2.97283	2.63053	2.79017	2.93573	2.52133	2.49976	2.4055	2.14096	2.7607	2.03532	1.84121	-0.27	-0.47	-0.25	-0.19	-0.25	-0.34	0.18	0.03	0.17	0.604688	0.366836	0.62976	0.717432	0.628501	0.513192	0.725792	0.956597	0.748432	1	1	1	1	1	1	1	1	0.958
ENSG00000169692.13	AGPAT2	0	12	14.8538	12.567	15.0042	13.5645	8.87957	9.79301	8.78823	11.7158	11.7223	12.029	11.4054	11.0122	-0.05	0.14	0.12	0.17	-0.03	0.34	-0.16	0.01	0.2	0.815106	0.552892	0.60628	0.466767	0.897005	0.142949	0.496408	0.950392	0.383936	1	1	1	1	1	1	1	1	0.82018
ENSG00000160216.21	AGPAT3	0	12	10.9891	8.96711	9.78078	10.1317	19.2025	18.501	17.5687	18.6381	14.4585	15.7066	13.1392	11.1149	-0.13	-0.05	0.14	-0.03	-0.13	-0.11	-0.07	-0.08	-0.01	0.779323	0.911403	0.760116	0.949674	0.773865	0.809182	0.878117	0.866508	0.982421	1	1	1	1	1	1	1	1	0.998356
ENSG00000026652.15	AGPAT4	0	12	2.30436	1.83734	2.11275	1.8453	2.59601	2.5552	2.54314	1.78991	3.24169	3.57576	2.34543	3.257	-0.12	0	-0.07	-0.01	-0.03	-0.57	0	-0.46	0.15	0.846589	0.998281	0.909671	0.992157	0.963757	0.357453	0.99694	0.45848	0.813115	1	1	1	1	1	1	1	1	0.969602
ENSG00000155189.12	AGPAT5	0	12	49.5208	50.8555	66.138	51.8562	20.1837	19.747	17.9285	19.6696	22.8823	23.1393	23.1253	17.5821	0.31	0.55	0.29	-0.01	-0.18	-0.1	-0.15	0.07	-0.12	0.726796	0.529158	0.736544	0.988402	0.834404	0.90607	0.864291	0.932862	0.894124	1	1	1	1	1	1	1	1	0.984797
ENSG00000188157.15	AGRN	0	12	38.8902	35.2293	55.8963	55.9111	65.5689	75.3089	78.5958	97.3746	16.3909	19.3702	24.7163	31.5187	0.08	0.65	0.77	0.23	0.25	0.53	0.06	0.67	1.16	0.864064	0.176364	0.108606	0.633744	0.607662	0.268776	0.902436	0.163176	0.0160371	1	1	0.787676	1	1	1	1	1	0.189719
ENSG00000135049.16	AGTPBP1	0	12	12.2223	9.7362	8.43718	7.51154	6.83275	7.07894	6.94019	7.18464	11.3315	10.5294	8.46977	5.54054	-0.14	-0.42	-0.46	0.07	0.01	0	-0.26	-0.36	-0.82	0.599319	0.128823	0.0958221	0.810471	0.960455	0.999125	0.343436	0.188884	0.00289892	1	1	0.761792	1	1	1	1	1	0.0728719
ENSG00000177674.16	AGTRAP	0	12	12.9441	11.8283	18.3191	20.2765	14.9297	16.7448	16.8381	23.4969	24.3304	22.9488	26.6625	18.6972	0.07	0.62	0.9	0.18	0.17	0.59	-0.25	0.22	-0.14	0.842822	0.0617402	0.00728405	0.582546	0.616351	0.0774859	0.45603	0.501011	0.666322	1	1	0.252814	1	1	1	1	1	0.936644
ENSG00000153207.16	AHCTF1	0	12	29.1423	25.6786	24.2092	23.043	15.3989	13.5721	13.5225	12.163	39.0696	39.8018	35.7274	27.1575	0.02	-0.14	-0.09	-0.16	-0.21	-0.4	-0.14	-0.08	-0.26	0.945653	0.655113	0.770728	0.611201	0.520089	0.220808	0.66985	0.794042	0.426238	1	1	1	1	1	1	1	1	0.847398
ENSG00000101444.13	AHCY	0	12	76.1543	73.4295	94.1005	103.299	62.6348	64.6417	57.3746	70.3906	157.995	159.469	190.772	167.669	0.14	0.43	0.69	0.06	-0.13	0.11	-0.16	0.36	0.33	0.569145	0.0923755	0.00644567	0.798836	0.601839	0.676134	0.518685	0.152401	0.188418	1	1	0.238836	1	1	1	1	1	0.627096
ENSG00000168710.18	AHCYL1	0	12	39.0253	33.1321	34.1596	28.2504	29.863	30.1893	27.8574	27.2931	71.5384	73.4661	114.677	104.915	-0.05	-0.07	-0.22	0.05	-0.09	-0.19	-0.11	0.79	0.67	0.946714	0.923206	0.762049	0.947036	0.901742	0.79301	0.882772	0.280477	0.363117	1	1	1	1	1	1	1	1	0.807155
ENSG00000158467.16	AHCYL2	0	12	4.04235	3.92399	3.72365	3.81136	2.19375	1.62934	2.12947	1.484	3.30136	3.49668	2.56963	2.40876	0.16	0	0.16	-0.39	-0.05	-0.61	-0.11	-0.28	-0.05	0.798851	0.99568	0.798329	0.539224	0.93643	0.342119	0.862979	0.662799	0.943486	1	1	1	1	1	1	1	1	0.994077
ENSG00000126705.15	AHDC1	0	12	4.24986	5.04512	3.54208	3.73734	2.41527	2.66751	2.71826	3.27299	1.03533	1.18583	1.96284	2.32563	0.51	-0.13	0.07	0.16	0.15	0.37	0	1.02	1.33	0.47532	0.852598	0.924852	0.818036	0.831622	0.606743	0.995788	0.154531	0.0625878	1	1	1	1	1	1	1	1	0.375153
ENSG00000135541.21	AHI1	0	12	11.165	9.04755	8.89971	7.20502	12.0721	11.4492	11.3757	9.40983	7.15906	7.12406	4.82648	2.73378	-0.14	-0.21	-0.38	-0.03	-0.09	-0.41	-0.18	-0.52	-1	0.816315	0.734445	0.537877	0.966942	0.889049	0.510979	0.766386	0.405391	0.107892	1	1	1	1	1	1	1	1	0.489519
ENSG00000124942.14	AHNAK	0	12	49.7564	40.939	37.1784	31.5815	35.2564	42.676	48.0513	45.0791	3.06846	3.54258	7.66741	6.74407	-0.07	-0.3	-0.41	0.29	0.41	0.31	0.07	1.4	1.16	0.951854	0.804985	0.736656	0.809202	0.737376	0.800883	0.950688	0.249323	0.338507	1	1	1	1	1	1	1	1	0.786351
ENSG00000100591.8	AHSA1	0	12	62.9353	58.4582	59.6404	56.4532	94.7119	88.6606	83.4494	91.4571	60.8703	63.347	63.5076	60.3366	0.1	0.05	0.1	-0.07	-0.18	-0.11	-0.14	0.11	0.26	0.749572	0.887273	0.756667	0.838152	0.577586	0.74752	0.660957	0.729956	0.426389	1	1	1	1	1	1	1	1	0.847398
ENSG00000173209.23	AHSA2P	0	12	31.1909	28.6596	33.1189	29.6976	12.845	11.4189	11.9758	13.9218	24.0092	25.26	26.6218	22.4893	0.07	0.21	0.18	-0.14	-0.1	0.07	-0.1	0.25	0.14	0.81569	0.481995	0.547489	0.640748	0.725366	0.807123	0.735368	0.394652	0.643172	1	1	1	1	1	1	1	1	0.931523
ENSG00000186063.13	AIDA	0	12	21.3234	16.2335	15.7079	12.3418	9.17394	9.94329	10.0288	10.1612	18.6972	20.8574	19.0221	14.8721	-0.19	-0.32	-0.55	0.14	0.11	0.08	-0.01	0.1	-0.03	0.557729	0.331399	0.0981127	0.68228	0.743013	0.801705	0.964945	0.76954	0.932545	1	1	0.767072	1	1	1	1	1	0.991824
ENSG00000156709.15	AIFM1	0	12	13.4374	12.8367	14.7713	15.0157	6.75643	6.61087	6.78749	6.75922	18.8174	19.7274	18.9541	16.5805	0.1	0.25	0.42	0	0.01	-0.05	-0.1	0.09	0.07	0.643985	0.21933	0.0439713	0.982755	0.972671	0.817007	0.621641	0.645294	0.725931	1	1	0.582087	1	1	1	1	1	0.952112
ENSG00000042286.15	AIFM2	0	12	4.41245	3.23696	4.44352	3.83396	1.46211	1.62728	1.49977	1.88176	4.57506	4.83172	5.74548	4.52959	-0.23	0.14	0.04	0.18	0.03	0.3	-0.07	0.44	0.24	0.637211	0.779949	0.941223	0.713868	0.949265	0.539446	0.878525	0.36674	0.618121	1	1	1	1	1	1	1	1	0.925847
ENSG00000146416.19	AIG1	0	12	13.4126	12.0563	12.514	11.6343	16.5835	16.314	14.8047	15.2285	10.015	9.08179	7.55728	6.10789	0.04	0.02	0.04	0	-0.15	-0.19	-0.31	-0.35	-0.43	0.891372	0.942701	0.903562	0.994497	0.627054	0.546811	0.335672	0.271213	0.174855	1	1	1	1	1	1	1	1	0.606659
ENSG00000164022.17	AIMP1	0	12	30.4871	25.7213	29.2144	28.4262	27.3295	25.6982	22.4399	24.4084	35.254	33.0769	27.8533	19.3136	-0.06	0.06	0.15	-0.06	-0.28	-0.22	-0.24	-0.28	-0.61	0.748469	0.767069	0.447414	0.751626	0.14661	0.26736	0.212902	0.156751	0.00200468	1	1	1	1	1	1	1	1	0.0602004
ENSG00000106305.10	AIMP2	0	12	20.8912	19.0752	23.863	28.4706	21.4505	20.5272	19.1989	23.1384	23.0478	21.5572	19.4801	12.8181	0.01	0.31	0.7	-0.04	-0.16	0.04	-0.24	-0.19	-0.62	0.988495	0.477548	0.102576	0.928724	0.708362	0.920733	0.58141	0.666245	0.148682	1	1	0.776385	1	1	1	1	1	0.567957
ENSG00000110711.10	AIP	0	12	43.3627	36.7909	35.8095	32.9321	20.4775	18.3026	17.2945	19.3938	23.2737	24.7535	20.8456	18.8521	-0.04	-0.15	-0.15	-0.13	-0.24	-0.13	-0.09	-0.09	-0.05	0.871812	0.578722	0.585939	0.625931	0.386096	0.633536	0.736079	0.758066	0.842776	1	1	1	1	1	1	1	1	0.974214
ENSG00000129474.16	AJUBA	0	12	14.1746	10.5747	9.61831	9.58983	23.1276	22.7252	23.2451	24.1027	28.1009	26.5413	25.208	17.8474	-0.16	-0.43	-0.33	0	-0.02	0.01	-0.24	-0.07	-0.4	0.838317	0.592557	0.676227	0.997566	0.978475	0.989182	0.762237	0.926187	0.621132	1	1	1	1	1	1	1	1	0.926175
ENSG00000106992.19	AK1	0	12	14.2514	13.5947	25.311	28.9801	8.08515	14.7948	13.5292	19.7136	13.5591	17.6148	23.9609	20.4359	0.12	0.95	1.27	0.89	0.72	1.26	0.17	0.92	0.86	0.743704	0.0119566	0.000781865	0.01937	0.0562794	0.000961139	0.648969	0.0150359	0.0231338	1	0.981639	0.0711703	1	1	0.179206	1	0.505026	0.225821
ENSG00000004455.17	AK2	0	12	123.49	108.499	89.2626	84.5904	54.6534	53.7007	47.2212	50.5927	95.6763	93.0511	78.4539	68.0216	0.02	-0.35	-0.3	-0.01	-0.21	-0.18	-0.22	-0.24	-0.25	0.945849	0.336181	0.407421	0.979005	0.56094	0.616291	0.546013	0.501946	0.485654	1	1	1	1	1	1	1	1	0.877009
ENSG00000147853.17	AK3	0	12	23.5816	22.9097	29.1471	25.4674	17.0505	22.069	20.7729	27.7465	12.4732	13.8434	22.8118	14.565	0.14	0.43	0.36	0.38	0.27	0.63	0	1.01	0.49	0.677374	0.205209	0.291152	0.262672	0.431736	0.0625955	0.997413	0.00272795	0.148368	1	1	0.982981	1	1	1	1	0.238905	0.567734
ENSG00000162433.15	AK4	0	12	21.6196	18.6517	19.0031	17.0179	15.0416	15.7018	15.0218	14.3672	6.59238	6.99961	7.10804	5.81842	0.01	-0.06	-0.1	0.1	0	-0.11	-0.12	0.2	0.26	0.991091	0.939161	0.902082	0.903996	0.99791	0.885933	0.877989	0.801673	0.745419	1	1	1	1	1	1	1	1	0.957869
ENSG00000154027.19	AK5	0	12	4.42283	3.04223	1.81936	1.0264	5.16734	3.96638	3.74214	3.78219	94.9911	87.5059	51.3661	54.1221	-0.33	-1.16	-1.87	-0.31	-0.41	-0.57	-0.24	-0.82	-0.82	0.842849	0.486385	0.26052	0.850118	0.806789	0.733458	0.884569	0.621951	0.621154	1	1	0.965013	1	1	1	1	1	0.926175
ENSG00000085231.14	AK6	0	12	38.8658	30.0504	31.1874	28.884	19.5859	19.8084	17.5868	20.8057	49.0333	43.0209	34.0722	22.9894	-0.19	-0.2	-0.18	0.04	-0.15	-0.01	-0.32	-0.48	-0.88	0.616345	0.595033	0.622425	0.922369	0.681031	0.982075	0.392387	0.19885	0.0179955	1	1	1	1	1	1	1	1	0.201248
ENSG00000121057.13	AKAP1	0	12	9.68184	8.63463	8.89742	8.0794	9.06312	8.27475	8.11503	7.88166	13.5703	14.4418	16.6675	11.7307	-0.01	-0.01	-0.01	-0.11	-0.17	-0.26	-0.11	0.39	0.21	0.992817	0.99251	0.981871	0.856507	0.781502	0.67228	0.852967	0.527826	0.733075	1	1	1	1	1	1	1	1	0.954969
ENSG00000108599.15	AKAP10	0	12	13.6603	12.207	14.238	14.1818	11.9014	12.247	12.5927	13.1115	16.0744	15.9404	17.097	13.1722	0	0.18	0.3	0.07	0.06	0.09	-0.18	0.17	-0.07	0.993539	0.545921	0.301253	0.819593	0.82935	0.759435	0.532415	0.55256	0.812378	1	1	0.984856	1	1	1	1	1	0.969602
ENSG00000023516.9	AKAP11	0	12	7.82153	7.02901	9.03119	8.38948	8.79351	9.51963	10.2239	10.8795	7.97186	8.01133	7.22503	5.22726	0	0.32	0.35	0.14	0.2	0.23	-0.15	-0.08	-0.37	0.985433	0.131822	0.103379	0.526141	0.352937	0.27899	0.493142	0.705218	0.0844686	1	1	0.778449	1	1	1	1	1	0.43504
ENSG00000170776.22	AKAP13	0	12	16.2432	13.3163	11.9286	10.4095	22.6832	21.2565	25.348	20.6133	12.0842	14.3728	11.0694	11.0995	-0.08	-0.32	-0.39	-0.05	0.14	-0.18	0.07	-0.06	0.13	0.773284	0.262723	0.179425	0.874552	0.63897	0.530844	0.799245	0.828704	0.64681	1	1	0.88541	1	1	1	1	1	0.93215
ENSG00000197976.12	AKAP17A	0	12	12.4018	11.1417	11.3783	10.8685	12.8152	12.7582	11.6657	13.162	13.2976	14.1381	14.8411	13.0578	0.06	0	0.05	0.02	-0.14	-0.01	-0.1	0.25	0.26	0.878904	0.996866	0.891605	0.950885	0.731831	0.970202	0.809127	0.537656	0.522196	1	1	1	1	1	1	1	1	0.893111
ENSG00000118507.17	AKAP7	0	12	3.38837	2.88502	2.57137	2.22068	3.03417	2.61247	2.35293	2.37065	4.12028	3.32114	2.41316	1.56244	-0.07	-0.28	-0.36	-0.2	-0.38	-0.47	-0.48	-0.7	-1.02	0.910582	0.666363	0.575707	0.75961	0.559896	0.481579	0.459227	0.280314	0.11834	1	1	1	1	1	1	1	1	0.509459
ENSG00000105127.9	AKAP8	0	12	10.3051	8.22063	8.72297	9.23959	9.09403	8.39628	8.37398	8.78018	11.2162	12.0512	13.1145	12.5437	-0.16	-0.12	0.09	-0.09	-0.13	-0.08	-0.09	0.3	0.41	0.352921	0.470902	0.579551	0.600119	0.440214	0.626498	0.597192	0.0767413	0.0159329	1	1	1	1	1	1	1	0.889458	0.188976
ENSG00000011243.18	AKAP8L	0	12	32.8268	24.5791	29.864	29.1654	16.7097	17.8598	17.5062	20.5332	36.3933	39.6274	31.0427	33.1989	-0.22	-0.01	0.08	0.12	0.06	0.24	-0.07	-0.17	0.1	0.496246	0.966386	0.812287	0.699502	0.847501	0.452248	0.838338	0.598086	0.753613	1	1	1	1	1	1	1	1	0.958661
ENSG00000127914.18	AKAP9	0	12	17.5009	16.9556	16.5619	15.025	11.0852	11.9457	11.8189	11.2677	19.6854	21.9931	18.0503	12.5417	0.14	0.04	0.03	0.13	0.08	-0.04	-0.03	-0.05	-0.24	0.812012	0.943611	0.955483	0.818037	0.890542	0.945353	0.964656	0.928062	0.669702	1	1	1	1	1	1	1	1	0.93754
ENSG00000166452.12	AKIP1	0	12	11.4276	9.29176	12.7435	12.0243	10.0216	12.7115	11.3887	13.6917	28.445	26.4849	26.2889	20.1331	-0.12	0.28	0.31	0.36	0.18	0.41	-0.27	-0.04	-0.27	0.714901	0.411536	0.35318	0.28804	0.601422	0.23253	0.423821	0.897155	0.423881	1	1	1	1	1	1	1	1	0.847138
ENSG00000174574.16	AKIRIN1	0	12	27.8511	24.9584	31.3277	30.27	25.4754	25.8225	24.8152	27.5359	47.8808	47.1683	42.4878	35.0912	0.01	0.29	0.37	0.04	-0.04	0.06	-0.18	-0.11	-0.19	0.952323	0.0546397	0.013395	0.765741	0.783723	0.700194	0.215902	0.449958	0.200538	1	1	0.336866	1	1	1	1	1	0.643352
ENSG00000135334.9	AKIRIN2	0	12	23.8846	21.913	16.6207	15.5787	21.5585	19.4007	19.9501	20.5802	12.1345	12.8144	10.7077	9.19242	0.11	-0.4	-0.37	-0.11	-0.12	-0.11	-0.07	-0.1	-0.2	0.831191	0.445495	0.476587	0.826631	0.816239	0.832519	0.899329	0.844169	0.702933	1	1	1	1	1	1	1	1	0.946217
ENSG00000117448.14	AKR1A1	0	12	31.4151	23.411	28.4875	27.5909	34.1984	33.8666	31.9428	38.1095	51.1355	52.3489	53.5065	40.495	-0.23	-0.02	0.06	0.01	-0.1	0.1	-0.14	0.15	-0.08	0.426239	0.948973	0.846007	0.973074	0.728115	0.731204	0.618958	0.600196	0.771405	1	1	1	1	1	1	1	1	0.960776
ENSG00000085662.14	AKR1B1	0	12	43.1157	40.862	39.7378	34.3305	32.2157	31.4423	30.9091	32.9264	63.1972	69.3146	78.9885	69.3888	0.13	0.01	-0.09	-0.01	-0.06	-0.03	-0.03	0.43	0.41	0.709233	0.987073	0.800036	0.974119	0.85302	0.934211	0.924155	0.218694	0.238972	1	1	1	1	1	1	1	1	0.691194
ENSG00000196139.14	AKR1C3	0	12	11.7675	11.23	12.9727	11.6094	4.37664	6.69848	6.62462	7.70829	267.846	274.714	227.765	201.656	0.22	0.28	0.21	0.66	0.61	0.77	-0.1	-0.14	-0.23	0.832389	0.784743	0.833131	0.516785	0.550288	0.451512	0.918697	0.88922	0.822522	1	1	1	1	1	1	1	1	0.970548
ENSG00000053371.12	AKR7A2	0	12	17.9861	17.0568	19.0542	19.5305	23.0723	26.5782	23.8767	30.2109	23.0486	23.564	22.8656	18.1689	0.09	0.2	0.37	0.22	0.05	0.32	-0.15	0.07	-0.08	0.617086	0.273005	0.0415729	0.234977	0.803168	0.0867501	0.415818	0.711779	0.678684	1	1	0.570433	1	1	1	1	1	0.939915
ENSG00000142208.17	AKT1	0	12	19.2678	16.9057	18.7198	17.46	28.7371	28.2516	25.7451	28.6723	25.6524	30.1045	33.0171	32.0193	-0.03	0.07	0.11	-0.01	-0.16	-0.06	0.02	0.45	0.6	0.905322	0.761449	0.649617	0.982997	0.510657	0.802732	0.919389	0.0633617	0.0134391	1	1	1	1	1	1	1	0.851673	0.170562
ENSG00000105221.18	AKT2	0	12	33.7095	29.9768	32.424	32.3121	37.1253	35.8277	33.9213	37.2407	33.5574	41.9055	36.5107	35.4588	0	0.06	0.19	-0.02	-0.14	-0.06	0.14	0.2	0.34	0.977127	0.686265	0.201503	0.892192	0.364522	0.715939	0.351365	0.176334	0.0261333	1	1	0.906319	1	1	1	1	1	0.238908
ENSG00000117020.18	AKT3	0	12	63.9002	54.0268	46.6679	39.9665	24.72	20.6633	20.8357	18.9165	10.1987	11.2797	8.20506	6.44686	-0.06	-0.34	-0.43	-0.22	-0.25	-0.46	0.02	-0.23	-0.46	0.87561	0.378878	0.258565	0.561963	0.517685	0.227914	0.965542	0.552082	0.22575	1	1	0.963568	1	1	1	1	1	0.675556
ENSG00000166971.17	AKTIP	0	12	9.39063	7.19961	8.49098	6.75208	9.07302	7.0807	7.59714	5.7844	13.2943	11.6042	7.68724	4.86118	-0.21	-0.03	-0.24	-0.32	-0.26	-0.67	-0.36	-0.75	-1.15	0.578705	0.943001	0.526848	0.396484	0.491417	0.0771173	0.33205	0.0445881	0.00216498	1	1	1	1	1	1	1	0.766157	0.0624036
ENSG00000286616.1	AL008730.1	0	12	2.54197	2.21904	2.55139	1.90806	1.64041	1.38709	1.90717	1.60453	2.43464	3.36066	2.15896	1.90499	-0.07	0.12	-0.16	-0.21	0.18	-0.12	0.29	-0.08	-0.08	0.85667	0.750148	0.657447	0.575131	0.622207	0.748337	0.428239	0.837373	0.821381	1	1	1	1	1	1	1	1	0.970548
ENSG00000285646.2	AL021155.4	0	12	13.2644	9.3026	8.40508	6.69296	2.21236	2.60892	2.41875	2.8412	16.8475	16.12	11.9151	10.0521	-0.33	-0.54	-0.74	0.25	0.14	0.3	-0.25	-0.5	-0.43	0.492719	0.265155	0.131313	0.617538	0.783597	0.56014	0.613533	0.308343	0.378479	1	1	0.828948	1	1	1	1	1	0.816747
ENSG00000272316.1	AL021368.2	0	12	1.87816	1.51698	2.20936	1.84761	1.64127	1.29411	1.41483	1.10037	1.57346	1.82025	1.09844	1.02379	-0.18	0.35	0.22	-0.3	-0.22	-0.64	0.06	-0.44	-0.41	0.647483	0.377769	0.579454	0.443025	0.572997	0.118579	0.877907	0.262746	0.297518	1	1	1	1	1	1	1	1	0.745898
ENSG00000228274.4	AL021707.2	0	12	2.25449	2.12965	2.1742	1.63606	1.83301	1.50765	1.82467	1.69347	2.29062	2.98122	2.74478	2.07678	0.06	0.06	-0.22	-0.27	-0.01	-0.13	0.21	0.37	0.19	0.864487	0.868869	0.555093	0.463404	0.979253	0.742756	0.557403	0.315663	0.606998	1	1	1	1	1	1	1	1	0.92312
ENSG00000286523.1	AL022151.1	0	12	3.47567	3.29779	3.35335	2.75681	1.61359	1.44652	1.89828	1.72102	2.38039	3.46509	2.19892	2.46761	0.05	0.06	-0.08	-0.13	0.2	-0.01	0.37	-0.02	0.33	0.878353	0.864023	0.815041	0.713186	0.572649	0.977403	0.295595	0.957917	0.356813	1	1	1	1	1	1	1	1	0.800797
ENSG00000272720.1	AL022322.1	0	12	2.66895	2.57667	2.70434	2.0524	1.71575	1.73535	2.11697	1.77487	2.36667	3.28952	2.49696	2.66659	0.08	0.13	-0.13	0.07	0.29	-0.04	0.32	0.18	0.47	0.821907	0.719069	0.735338	0.859571	0.439734	0.923843	0.394296	0.637213	0.208499	1	1	1	1	1	1	1	1	0.6555
ENSG00000280184.2	AL023806.3	0	12	1.88156	1.69065	1.72226	1.3323	1.43415	1.45769	1.94415	1.61612	2.28334	3.01787	1.97339	1.70538	-0.03	-0.01	-0.25	0.06	0.41	0.11	0.25	-0.11	-0.05	0.956299	0.978577	0.612551	0.906931	0.398854	0.817787	0.601907	0.828075	0.916456	1	1	1	1	1	1	1	1	0.989252
ENSG00000283737.1	AL023875.1	0	12	40.8198	38.0627	39.1567	26.2606	28.1057	24.8773	31.826	24.3447	33.5512	47.3206	31.8594	32.6385	0.07	0.06	-0.39	-0.13	0.15	-0.22	0.33	0.01	0.25	0.750847	0.786423	0.0775057	0.543366	0.484241	0.334477	0.131953	0.958623	0.263616	1	1	0.717287	1	1	1	1	1	0.715136
ENSG00000268575.1	AL031282.2	0	12	1.76309	1.70713	1.84763	1.76722	1.25666	1.15637	1.14287	1.26968	1.04906	1.37066	1.2727	1.21517	0.1	0.18	0.25	-0.09	-0.15	-0.05	0.23	0.37	0.44	0.77641	0.587956	0.449959	0.781116	0.663972	0.876983	0.489254	0.27687	0.188294	1	1	1	1	1	1	1	1	0.627096
ENSG00000278948.1	AL031587.5	0	12	12.657	9.70152	21.3167	21.2703	5.39266	6.32596	7.18805	8.34051	2.76594	3.88856	8.96008	7.27592	-0.19	0.88	0.99	0.25	0.38	0.58	0.35	1.85	1.57	0.79347	0.231107	0.178744	0.729149	0.607732	0.426604	0.633531	0.0118597	0.0324872	1	1	0.884798	1	1	1	1	0.448585	0.269616
ENSG00000278966.2	AL031602.1	0	12	2.43563	2.60574	1.67084	1.41196	1.8343	1.48508	1.82911	2.85293	2.79229	1.79741	2.21002	2.5929	0.23	-0.42	-0.54	-0.24	-0.01	0.53	-0.77	-0.23	0.26	0.658858	0.422564	0.305358	0.654607	0.985566	0.336021	0.142117	0.666498	0.617585	1	1	0.984887	1	1	1	1	1	NA
ENSG00000235189.2	AL034405.1	0	12	2.31178	2.49217	2.00744	1.724	1.61253	1.34555	1.6262	1.17556	2.3392	3.17951	2.14264	2.30861	0.26	-0.09	-0.18	-0.22	-0.01	-0.41	0.28	-0.03	0.28	0.319261	0.743442	0.510299	0.41017	0.966569	0.172639	0.28352	0.920864	0.296191	1	1	1	1	1	1	1	1	0.745048
ENSG00000260257.2	AL035071.1	0	12	2.72713	2.27051	2.5075	1.54739	3.32596	3.41291	3.94425	3.45729	1.25115	1.32874	1.56953	1.13306	-0.12	-0.01	-0.57	0.06	0.22	-0.02	-0.1	0.43	0.16	0.726678	0.974665	0.111035	0.864761	0.539114	0.961567	0.782408	0.239776	0.655245	1	1	0.7922	1	1	1	1	1	0.934137
ENSG00000286472.1	AL035252.5	0	12	2.62109	2.74674	2.85451	2.03937	1.47951	1.28594	1.87665	1.29196	2.13829	3.03811	1.77386	2.04371	0.19	0.23	-0.11	-0.17	0.32	-0.26	0.35	-0.16	0.18	0.684667	0.60922	0.815102	0.715872	0.488842	0.581616	0.443326	0.721839	0.695151	1	1	1	1	1	1	1	1	0.944603
ENSG00000286918.1	AL035411.3	0	12	2.95945	3.08353	3.22787	2.49083	2.01067	1.7914	2.30097	1.49857	2.40323	3.56215	2.05912	2.11924	0.18	0.23	0	-0.14	0.16	-0.48	0.41	-0.12	0.1	0.702262	0.608798	0.994575	0.758028	0.73371	0.315897	0.368707	0.790698	0.833391	1	1	1	1	1	1	1	1	0.972436
ENSG00000234147.1	AL035446.1	0	12	15.3688	14.4791	17.1172	18.6873	8.57722	7.33657	8.08517	6.14995	1.49752	2.11691	1.68697	1.58496	0.11	0.28	0.54	-0.19	-0.08	-0.55	0.36	0.21	0.1	0.923765	0.806352	0.634615	0.864952	0.940819	0.632597	0.754339	0.852151	0.929991	1	1	1	1	1	1	1	1	0.991328
ENSG00000258526.7	AL049828.1	0	12	4.06221	3.91689	4.00955	3.21486	2.60305	2.30816	2.91675	2.27104	3.26295	4.3802	2.93127	2.87394	0.09	0.09	-0.08	-0.15	0.14	-0.35	0.26	-0.06	0.08	0.77486	0.772763	0.796137	0.655591	0.663251	0.308784	0.421245	0.846755	0.804704	1	1	1	1	1	1	1	1	0.96758
ENSG00000269940.1	AL049840.4	0	12	2.98259	2.70768	3.22243	3.20932	5.26802	5.19831	5.86161	5.4771	3.05056	3.56619	5.07052	3.91905	0	0.22	0.36	0	0.14	0.06	0.09	0.89	0.62	0.993957	0.654629	0.467308	0.998629	0.770727	0.902308	0.854264	0.0703729	0.206521	1	1	1	1	1	1	1	0.876291	0.653506
ENSG00000269958.1	AL049840.5	0	12	3.07678	2.70618	4.20849	3.22642	5.47362	6.49854	6.59512	7.94817	3.87311	4.12846	5.52253	4.75429	-0.05	0.57	0.32	0.27	0.24	0.44	-0.06	0.63	0.54	0.909575	0.16044	0.428172	0.489612	0.551773	0.284439	0.883415	0.114444	0.178144	1	1	1	1	1	1	1	1	0.612146
ENSG00000270108.1	AL049840.6	0	12	3.38928	2.67766	2.92879	1.92278	3.01325	3.00182	3.74882	3.18133	3.43898	3.07773	2.94827	2.02465	-0.17	-0.09	-0.57	0.03	0.3	0.08	-0.31	-0.15	-0.59	0.702982	0.840479	0.217531	0.95276	0.510688	0.876447	0.499342	0.748985	0.198941	1	1	0.927431	1	1	1	1	1	NA
ENSG00000223653.6	AL078459.1	0	12	8.31565	8.13827	9.05318	6.86524	5.45459	5.08991	6.36147	4.83838	6.84039	10.1468	5.67251	6.55527	0.09	0.23	-0.03	-0.07	0.19	-0.24	0.4	-0.18	0.23	0.828051	0.56638	0.948153	0.867918	0.637173	0.561941	0.321307	0.664489	0.578842	1	1	1	1	1	1	1	1	0.914227
ENSG00000288044.1	AL096870.12	0	12	3.01303	3.21695	3.47294	4.09874	5.88537	6.32768	5.35659	6.81147	4.24224	5.07882	5.37082	4.60988	0.27	0.33	0.7	0.13	-0.13	0.16	0.1	0.42	0.38	0.362475	0.271062	0.0163139	0.62473	0.627276	0.58972	0.718572	0.132074	0.177688	1	1	0.369159	1	1	1	1	1	NA
ENSG00000276603.1	AL109614.1	0	12	2.66959	2.59623	3.03717	2.62252	1.75398	1.85955	1.84734	3.08682	2.42111	2.73882	3.06597	2.29591	0.19	0.32	0.23	0.15	0.05	0.84	0.07	0.45	0.22	0.764839	0.619726	0.715091	0.809772	0.941998	0.214701	0.918235	0.477639	0.734503	1	1	1	1	1	1	1	1	NA
ENSG00000288398.1	AL109627.1	0	12	1.31166	1.10404	1.45768	1.77117	1.0852	1.01095	1.04122	1.08434	1.90429	2.06842	1.58408	1.47678	-0.12	0.26	0.68	-0.1	-0.07	-0.03	-0.05	-0.18	-0.12	0.788296	0.569913	0.135694	0.835219	0.883751	0.942967	0.912429	0.694008	0.791339	1	1	0.832441	1	1	1	1	1	0.964774
ENSG00000271895.2	AL109811.2	0	12	1.43679	1.03642	1.51863	1.18501	2.93831	2.02267	2.81536	2.48175	2.64974	3.94622	2.76945	2.13501	-0.4	0.17	-0.02	-0.49	-0.1	-0.28	0.41	0.15	0.01	0.679781	0.859395	0.979708	0.611198	0.91594	0.777719	0.672136	0.875126	0.994672	1	1	1	1	1	1	1	1	1
ENSG00000216775.3	AL109918.1	0	12	4.43646	4.98901	2.84464	2.24112	1.69962	2.63708	2.15229	2.94096	2.56752	2.93806	2.74545	1.8074	0.42	-0.51	-0.73	0.63	0.31	0.71	0	0.2	-0.12	0.597985	0.526399	0.362753	0.43337	0.696699	0.377925	0.997092	0.807145	0.886015	1	1	1	1	1	1	1	1	0.984492
ENSG00000224271.7	AL117329.1	0	12	9.02745	7.368	9.33609	7.61124	11.9753	9.85448	13.8261	9.29315	7.4614	10.2156	5.29956	6.55398	-0.15	0.16	0.01	-0.25	0.17	-0.43	0.31	-0.44	0.04	0.661608	0.623361	0.98732	0.452767	0.59912	0.195132	0.357514	0.187982	0.910859	1	1	1	1	1	1	1	1	0.98859
ENSG00000271335.6	AL117336.2	0	12	2.79742	2.21884	2.15757	2.22735	4.34266	4.19823	4.14398	4.86323	1.95638	1.99028	2.01068	1.56762	-0.19	-0.26	-0.08	-0.01	-0.09	0.09	-0.11	0.18	-0.07	0.656269	0.54144	0.845043	0.981161	0.83413	0.845927	0.799077	0.680035	0.869988	1	1	1	1	1	1	1	1	0.981023
ENSG00000268858.2	AL118506.1	0	12	1.90873	1.93016	1.34501	1.14358	2.55202	2.85772	2.80877	3.45752	1.20242	1.5023	1.91919	1.79336	0.25	-0.38	-0.49	0.18	0.14	0.36	0.12	0.8	0.84	0.583085	0.39752	0.27914	0.691643	0.75668	0.431061	0.783724	0.0751776	0.061072	1	1	0.976119	1	1	1	1	0.888329	0.369595
ENSG00000260708.1	AL118516.1	0	12	12.0786	9.75937	8.85373	8.58081	5.67031	5.08613	4.18139	4.86527	6.13893	5.86441	5.38642	3.5947	-0.04	-0.31	-0.25	-0.11	-0.43	-0.24	-0.26	-0.14	-0.45	0.96104	0.704226	0.763681	0.889332	0.598821	0.769651	0.753068	0.866372	0.589228	1	1	1	1	1	1	1	1	0.916931
ENSG00000258790.1	AL121594.1	0	12	2.21413	1.89901	1.78708	2.32436	2.63734	2.62593	2.63979	3.24047	7.23754	7.48879	6.31898	4.95406	-0.04	-0.19	0.33	0.03	0.02	0.21	-0.14	-0.16	-0.24	0.920648	0.619275	0.387849	0.942757	0.963886	0.59114	0.713915	0.67633	0.516656	1	1	1	1	1	1	1	1	0.890494
ENSG00000272716.1	AL121658.1	0	12	2.99823	2.82171	2.58348	1.84229	1.5994	1.32076	1.24923	1.18366	1.95092	1.80305	1.68783	1.49294	0.13	-0.08	-0.43	-0.23	-0.35	-0.26	-0.27	-0.13	-0.09	0.767934	0.855261	0.333945	0.607883	0.440354	0.599317	0.552005	0.768243	0.837643	1	1	0.998778	1	1	1	1	1	NA
ENSG00000273619.1	AL121832.2	0	12	2.26983	2.27824	2.71872	3.9101	2.40531	2.46854	2.33562	2.95429	4.26594	4.23777	5.46192	3.92935	0.22	0.39	1.05	0.04	-0.07	0.3	-0.19	0.47	0.26	0.685785	0.473651	0.0514639	0.942844	0.89558	0.593001	0.728484	0.380067	0.62482	1	1	0.621159	1	1	1	1	1	0.926444
ENSG00000273154.3	AL121845.3	0	12	1.3534	1.22132	1.51507	1.7753	1.99571	2.0093	2.01843	2.06821	1.99931	2.27983	2.13655	2.18078	-0.03	0.27	0.64	0.04	0.02	0.01	-0.01	0.2	0.42	0.943917	0.555739	0.162948	0.932639	0.969747	0.975154	0.987839	0.668393	0.35365	1	1	0.874542	1	1	1	1	1	0.798625
ENSG00000284776.1	AL121900.1	0	12	24.7594	18.6019	15.2218	12.9486	12.7302	8.91552	8.04033	8.81768	19.5886	17.4864	9.78004	10.7564	-0.24	-0.59	-0.69	-0.48	-0.65	-0.59	-0.35	-0.98	-0.5	0.643171	0.260319	0.186318	0.361959	0.214172	0.262067	0.504165	0.062331	0.335002	1	1	0.891916	1	1	1	1	0.846018	0.782678
ENSG00000286405.1	AL132799.1	0	12	3.85884	3.59607	3.68425	3.36873	3.06603	2.67654	3.58943	3.62065	3.60229	4.90755	2.89556	2.69041	0.01	0.04	0.05	-0.17	0.2	0.13	0.31	-0.23	-0.19	0.982854	0.936478	0.91872	0.735236	0.68293	0.794299	0.536057	0.643753	0.706631	1	1	1	1	1	1	1	1	0.947614
ENSG00000276334.1	AL133243.2	0	12	7.75221	7.18335	7.3526	6.14176	3.09402	3.22926	3.07694	2.64255	5.08917	5.03829	3.03276	2.29472	0.11	0.05	-0.09	0.11	-0.04	-0.26	-0.17	-0.69	-0.87	0.834194	0.918437	0.863728	0.832409	0.941787	0.626082	0.738043	0.179487	0.0880556	1	1	1	1	1	1	1	1	0.442748
ENSG00000276517.1	AL133243.3	0	12	2.69942	2.28834	2.40173	1.70849	2.12772	1.78213	2.36638	1.89891	1.65387	2.65948	1.47809	1.59318	-0.07	-0.05	-0.41	-0.21	0.12	-0.24	0.51	-0.09	0.19	0.77359	0.846563	0.113046	0.405015	0.633189	0.371663	0.0485183	0.728294	0.462702	1	1	0.795218	1	1	1	1	1	0.868524
ENSG00000255339.6	AL133352.1	0	12	1.07051	1.04023	1.28745	1.25939	1.45427	1.29823	1.3298	1.49382	1.26386	1.04267	1.09405	1.17873	0.1	0.38	0.5	-0.14	-0.13	-0.02	-0.42	-0.18	0.18	0.841205	0.453625	0.329662	0.777875	0.791188	0.968969	0.408658	0.729998	0.723752	1	1	0.995428	1	1	1	1	1	0.951187
ENSG00000285976.2	AL135905.2	0	12	16.2514	17.5959	17.9302	29.4768	11.138	12.6359	12.8098	14.267	4.73016	5.30332	5.89921	4.28482	0.3	0.26	1.12	0.22	0.18	0.32	0.01	0.41	0.11	0.394185	0.462965	0.00131782	0.522864	0.612804	0.362372	0.97813	0.240237	0.744516	1	1	0.0993389	1	1	1	1	1	0.957869
ENSG00000272447.1	AL135925.1	0	12	2.76466	2.54695	2.62421	2.34277	3.29237	3.04149	2.69648	2.79373	2.42972	2.38122	2.82692	1.60674	0.03	0.03	0.02	-0.09	-0.28	-0.27	-0.16	0.34	-0.33	0.944183	0.943153	0.966816	0.843153	0.561147	0.588826	0.742995	0.481882	0.493864	1	1	1	1	1	1	1	1	0.879999
ENSG00000258727.1	AL135999.1	0	12	1.54839	1.55683	2.97847	3.97381	4.42289	3.67303	3.76443	3.52304	1.04063	1.41342	1.69662	1.68314	0.11	1.05	1.62	-0.22	-0.23	-0.37	0.31	0.86	0.93	0.868372	0.121576	0.0170324	0.745756	0.733568	0.586018	0.651403	0.202757	0.168445	1	1	0.377624	1	1	1	1	1	0.598088
ENSG00000278784.1	AL136295.7	0	12	2.82906	2.77935	2.68184	2.04738	2.42557	2.18173	2.77457	2.0811	2.92455	4.15568	2.71057	3.10033	0.13	0.04	-0.22	-0.12	0.15	-0.2	0.34	-0.02	0.33	0.63656	0.886549	0.425294	0.654457	0.575631	0.508246	0.218047	0.933577	0.233016	1	1	1	1	1	1	1	1	0.684819
ENSG00000286931.1	AL136419.3	0	12	3.4414	3.52752	3.27989	2.39473	2.37293	2.00825	2.66433	2.39352	3.33848	4.64917	2.65617	2.67128	0.16	0.04	-0.27	-0.21	0.14	-0.07	0.31	-0.25	-0.04	0.682765	0.911057	0.482422	0.587138	0.723029	0.861765	0.427797	0.523154	0.927797	1	1	1	1	1	1	1	1	0.991076
ENSG00000285572.2	AL136441.1	0	12	2.27186	2.26881	2.44996	1.93461	1.62312	1.54002	2.16303	1.61037	1.78736	2.12452	1.53389	1.38254	0.12	0.22	0.02	-0.05	0.39	-0.09	0.11	-0.15	-0.11	0.759049	0.575214	0.954989	0.901085	0.330826	0.83144	0.787372	0.714253	0.778749	1	1	1	1	1	1	1	1	0.960961
ENSG00000275318.1	AL136981.2	0	12	2.15375	1.43081	1.77685	1.80959	1.27722	1.19391	1.16995	1.39115	2.9823	3.09398	2.59538	1.86534	-0.47	-0.17	-0.02	-0.07	-0.13	-0.23	-0.1	-0.12	-0.44	0.399018	0.76312	0.9757	0.903831	0.817706	0.710424	0.85802	0.827274	0.429293	1	1	1	1	1	1	1	1	NA
ENSG00000283445.1	AL136985.3	0	12	4.72501	5.09308	5.21662	3.02979	3.65848	3.31018	4.58503	3.12726	4.06785	5.28356	2.2924	3.82102	0.22	0.25	-0.4	-0.11	0.29	-0.29	0.19	-0.8	0.2	0.658922	0.616614	0.434536	0.824584	0.569332	0.57542	0.703139	0.115917	0.691508	1	1	1	1	1	1	1	1	0.943734
ENSG00000273541.1	AL137060.1	0	12	4.6852	6.02856	5.41654	5.07746	4.36524	1.62522	2.13498	1.51612	6.2339	6.09793	3.99421	3.66894	0.56	0.33	0.36	-1.48	-0.93	-1.36	-0.24	-0.72	-0.48	0.760717	0.857628	0.843525	0.425348	0.615077	0.471768	0.895956	0.696316	0.794759	1	1	1	1	1	1	1	1	NA
ENSG00000261135.1	AL137802.2	0	12	2.64505	3.03945	2.07904	2.48769	1.14726	1.52463	1.2359	2.11536	3.43317	3.75728	3.84665	2.70099	0.42	-0.22	0.17	0.45	0.11	0.83	-0.03	0.25	-0.1	0.292527	0.583388	0.66733	0.27052	0.789283	0.054631	0.941321	0.524345	0.802087	1	1	1	1	1	1	1	1	0.967349
ENSG00000229109.2	AL137847.1	0	12	1.52246	1.48939	1.30748	1.27839	1.56845	1.21988	1.80804	1.36078	1.57109	1.95438	1.26379	1.1853	0.14	-0.1	0	-0.36	0.19	-0.19	0.18	-0.22	-0.12	0.704349	0.796122	0.996703	0.321042	0.605304	0.617812	0.636059	0.569604	0.756851	1	1	1	1	1	1	1	1	0.958782
ENSG00000237596.7	AL138828.1	0	12	3.29409	2.85105	3.83722	4.02092	16.3601	20.2346	23.3969	26.7827	2.21176	3.31376	1.66468	2.03094	-0.04	0.34	0.52	0.34	0.49	0.68	0.42	-0.33	0.18	0.895172	0.310807	0.121766	0.307568	0.138894	0.0432452	0.213786	0.329624	0.602704	1	1	0.811479	1	1	1	1	1	0.921684
ENSG00000248458.2	AL139147.1	0	12	2.1752	2.10618	1.97337	1.71882	1.3886	1.34491	1.56737	1.15315	1.62466	2.47744	1.45128	1.56981	0.08	-0.03	-0.09	-0.03	0.15	-0.22	0.48	-0.05	0.24	0.878324	0.951049	0.861255	0.959497	0.759538	0.670393	0.328455	0.926162	0.621717	1	1	1	1	1	1	1	1	0.926175
ENSG00000230615.7	AL139220.2	0	12	1.74144	1.54719	1.55576	1.41957	3.48763	3.43846	3.68823	4.01505	3.91395	3.583	2.14998	1.62912	-0.03	-0.05	-0.04	0	0.07	0.17	-0.25	-0.76	-1.02	0.943642	0.907028	0.922467	0.998816	0.867556	0.695505	0.560855	0.0795455	0.0184284	1	1	1	1	1	1	1	0.894929	0.204108
ENSG00000240731.1	AL139287.1	0	12	2.547	2.26492	3.31566	2.06083	2.32816	2.05454	2.20662	2.87775	2.66565	2.7784	1.6373	1.96424	0.02	0.51	-0.05	-0.15	-0.12	0.2	-0.16	-0.64	-0.18	0.960875	0.233153	0.911765	0.721884	0.784678	0.673003	0.715537	0.146836	0.678351	1	1	1	1	1	1	1	1	NA
ENSG00000203546.7	AL139353.1	0	12	2.43095	2.19043	2.19997	1.84868	1.79017	1.48038	1.50304	2.24958	2.40464	2.41081	2.31277	2.04832	0.01	-0.03	-0.15	-0.24	-0.29	0.08	-0.18	0.01	0.02	0.978347	0.939591	0.68612	0.508594	0.431945	0.834272	0.614715	0.987009	0.95065	1	1	1	1	1	1	1	1	0.994608
ENSG00000224799.1	AL139397.1	0	12	3.0129	4.18098	2.18916	1.38296	1.84159	1.86766	1.91694	1.8443	4.07867	7.12127	2.18663	2.85758	0.59	-0.34	-0.87	0.09	0.06	-0.11	0.58	-0.84	-0.14	0.452698	0.670856	0.27354	0.909861	0.944384	0.892099	0.460925	0.289388	0.856408	1	1	0.972847	1	1	1	1	1	0.977343
ENSG00000239665.8	AL157392.3	0	12	4.7579	3.45092	5.4756	5.19911	7.81183	8.35605	10.2345	8.32281	8.88409	11.5081	8.71385	8.66163	-0.34	0.31	0.37	0.12	0.36	0.05	0.23	0.06	0.19	0.392612	0.423086	0.34089	0.758285	0.35697	0.895841	0.559614	0.871004	0.620538	1	1	1	1	1	1	1	1	0.926175
ENSG00000279513.1	AL157902.2	0	12	1.89841	1.47306	1.56953	1.56317	1.35591	1.14211	1.34816	1.0998	1.30845	1.48827	1.56126	1.08155	-0.2	-0.16	-0.03	-0.23	-0.04	-0.37	0.04	0.38	-0.05	0.674963	0.733276	0.941511	0.626302	0.939503	0.47107	0.935327	0.431418	0.909884	1	1	1	1	1	1	1	1	NA
ENSG00000257524.6	AL157935.2	0	12	1.46639	1.18616	1.56122	1.91878	3.96001	3.99849	3.48374	4.12419	2.14998	2.31914	2.72823	2.69011	-0.15	0.2	0.64	0.06	-0.2	0.01	-0.05	0.45	0.48	0.804009	0.744883	0.299279	0.918297	0.750454	0.991436	0.941522	0.462512	0.433988	1	1	0.98471	1	1	1	1	1	0.852589
ENSG00000287833.1	AL157997.1	0	12	2.42929	2.62749	2.48884	1.88329	1.74968	1.50548	1.92157	1.39084	2.76348	3.98331	2.11954	2.47118	0.22	0.14	-0.11	-0.2	0.09	-0.44	0.36	-0.3	0.17	0.703953	0.802847	0.841707	0.728245	0.870904	0.454109	0.528067	0.603951	0.768731	1	1	1	1	1	1	1	1	0.960554
ENSG00000258634.3	AL160006.1	0	12	2.4878	1.91227	2.7143	2.16216	1.48997	1.29109	1.37805	1.33088	3.06046	3.24192	3.18955	2.83524	-0.22	0.24	0.03	-0.19	-0.13	-0.22	-0.09	0.15	0.11	0.540321	0.499115	0.925024	0.604898	0.725832	0.55328	0.809894	0.672067	0.763005	1	1	1	1	1	1	1	1	0.959319
ENSG00000233178.7	AL161457.2	0	12	7.41306	5.39597	5.56318	4.64331	2.37342	2.01554	1.83689	2.16564	5.5717	6.44261	3.89253	4.123	-0.36	-0.31	-0.43	-0.22	-0.39	-0.25	0.08	-0.47	-0.37	0.706478	0.745553	0.649488	0.81275	0.681862	0.792106	0.936596	0.618621	0.697856	1	1	1	1	1	1	1	1	0.944906
ENSG00000187186.15	AL162231.1	0	12	4.5967	4.41279	3.40967	4.20076	2.98655	4.40198	3.51508	4.68768	3.03953	1.91624	3.12927	3.07224	0.12	-0.31	0.12	0.59	0.26	0.56	-0.79	0.09	0.13	0.88331	0.692211	0.876778	0.461786	0.748014	0.488892	0.323395	0.913288	0.867777	1	1	1	1	1	1	1	1	0.980125
ENSG00000271853.5	AL162258.1	0	12	2.07418	1.52286	2.06872	2.15054	2.59866	2.58815	2.31067	2.57232	2.82432	2.36997	4.192	2.69073	-0.29	0.1	0.3	0.01	-0.15	-0.08	-0.41	0.71	0.22	0.522443	0.817541	0.510628	0.978981	0.729594	0.866991	0.363219	0.108309	0.617484	1	1	1	1	1	1	1	0.982887	0.925847
ENSG00000272030.1	AL162258.2	0	12	1.9863	1.55967	1.78389	1.91822	2.69309	2.43565	2.39319	2.48975	3.69792	3.95229	4.296	3.70622	-0.19	-0.05	0.2	-0.12	-0.17	-0.14	-0.08	0.34	0.31	0.528015	0.86938	0.516499	0.691265	0.56871	0.670091	0.795122	0.253059	0.295856	1	1	1	1	1	1	1	1	0.744953
ENSG00000228392.3	AL162391.1	0	12	1.88663	1.80383	1.77378	1.13048	1.36615	1.09362	1.50817	1.14473	1.96686	2.43779	1.79343	1.66013	0.09	0.03	-0.49	-0.28	0.12	-0.3	0.17	-0.04	0.03	0.714383	0.90448	0.0447244	0.246789	0.635131	0.250954	0.482229	0.879214	0.895542	1	1	0.585558	1	1	1	1	1	0.985424
ENSG00000257900.2	AL162632.1	0	12	2.48184	1.91415	2.60015	1.91018	2.69886	2.82341	2.65684	1.98793	5.22968	5.24067	5.06259	3.88645	-0.24	0.19	-0.12	0.09	-0.05	-0.48	-0.17	0.05	-0.04	0.663904	0.732188	0.827021	0.866626	0.930403	0.406657	0.747892	0.919845	0.934779	1	1	1	1	1	1	1	1	0.992223
ENSG00000280077.1	AL353763.2	0	12	6.17743	5.07716	4.99802	4.49451	4.33618	3.76857	4.07655	3.76787	2.97148	2.86155	2.12466	1.53463	-0.1	-0.19	-0.21	-0.17	-0.09	-0.26	-0.22	-0.42	-0.74	0.713891	0.497568	0.450443	0.536702	0.735171	0.358881	0.428359	0.13855	0.00758902	1	1	1	1	1	1	1	1	0.123262
ENSG00000259994.1	AL353796.1	0	12	1.67317	1.47012	1.45534	1.14238	1.51736	1.19572	1.57709	1.12619	1.54937	2.17217	1.62363	1.36812	-0.03	-0.09	-0.31	-0.32	0.03	-0.46	0.33	0.14	0.04	0.923253	0.790484	0.351732	0.330702	0.933308	0.190628	0.303263	0.673369	0.894381	1	1	1	1	1	1	1	1	0.985009
ENSG00000228906.1	AL353804.1	0	12	2.27652	2.10267	2.67165	1.73602	2.4973	2.43248	2.8917	1.52625	4.86251	5.98102	3.86929	3.31219	0.03	0.34	-0.15	0	0.17	-0.27	0.16	-0.24	-0.27	0.947459	0.464281	0.757015	0.996509	0.703481	0.601235	0.713029	0.597393	0.548034	1	1	1	1	1	1	1	1	NA
ENSG00000287839.1	AL353807.5	0	12	7.94712	5.90232	11.3542	8.66224	3.38911	3.5158	3.64387	3.85733	3.3534	3.53425	2.92334	2.55853	-0.18	0.65	0.36	0.08	0.08	0.14	-0.11	-0.11	-0.05	0.807211	0.389243	0.631993	0.911196	0.910013	0.849105	0.881063	0.885674	0.944902	1	1	1	1	1	1	1	1	0.994513
ENSG00000287679.1	AL355347.1	0	12	2.63922	2.43401	2.62545	2.10026	1.96662	1.6857	2.22499	1.7791	2.28124	3.11007	1.87867	2.0037	0.01	0.1	-0.08	-0.2	0.15	-0.23	0.3	-0.18	0.1	0.981202	0.781361	0.833756	0.594697	0.690229	0.551236	0.425373	0.629143	0.782979	1	1	1	1	1	1	1	1	0.962757
ENSG00000287653.1	AL355597.1	0	12	2.25599	2.80632	1.85371	1.30078	1.48803	1.5369	1.12928	1.4293	2.54789	3.62729	1.84602	1.60983	0.42	-0.17	-0.54	0.12	-0.38	-0.13	0.32	-0.41	-0.34	0.523821	0.802097	0.421364	0.852834	0.567377	0.853062	0.629923	0.537849	0.606679	1	1	1	1	1	1	1	1	NA
ENSG00000232774.8	AL355916.1	0	12	7.9969	8.18182	8.73058	5.84009	7.44068	8.19039	8.71544	9.45078	7.21204	11.3109	5.25023	7.05364	0.16	0.24	-0.2	0.17	0.21	0.27	0.46	-0.39	0.29	0.71361	0.57778	0.636793	0.69448	0.630573	0.52864	0.279364	0.36058	0.505865	1	1	1	1	1	1	1	1	0.885996
ENSG00000248503.2	AL356235.1	0	12	2.47618	2.42359	2.1424	1.90141	1.43932	1.36385	1.65508	1.66757	1.67776	2.24814	1.357	1.51472	0.15	-0.09	-0.12	-0.06	0.17	0.05	0.27	-0.24	0.09	0.572644	0.732421	0.634266	0.832104	0.509601	0.859875	0.309194	0.375265	0.742398	1	1	1	1	1	1	1	1	0.95725
ENSG00000280474.1	AL356481.2	0	12	8.99878	9.71247	9.16153	6.12279	5.86915	5.01027	7.602	5.42234	8.84609	10.8003	7.29963	7.62452	0.25	0.14	-0.31	-0.19	0.34	-0.19	0.13	-0.21	0.07	0.401463	0.642424	0.304373	0.523683	0.264582	0.57624	0.674824	0.493942	0.813669	1	1	0.984856	1	1	1	1	1	0.969602
ENSG00000270066.3	AL356488.2	0	12	56.834	43.8236	77.7986	93.3939	56.4221	51.3374	55.4765	62.0155	57.2099	57.0377	123.941	87.8745	-0.2	0.57	0.96	-0.12	-0.03	0.09	-0.13	1.28	0.85	0.67195	0.235828	0.0442788	0.802064	0.948111	0.857669	0.792328	0.00754669	0.0752796	1	1	0.583604	1	1	1	1	0.378954	0.409246
ENSG00000282993.1	AL356737.1	0	12	76.5783	89.0443	87.5338	82.9032	25.0087	21.533	28.0304	30.1775	42.2085	53.5674	29.179	41.1623	0.4	0.31	0.36	-0.19	0.12	0.22	0.16	-0.47	0.27	0.194699	0.313648	0.241589	0.544382	0.703416	0.499031	0.600096	0.136773	0.390199	1	1	0.950207	1	1	1	1	1	0.825115
ENSG00000287933.1	AL357141.1	0	12	3.01882	2.98003	3.29973	2.63899	2.1944	1.85178	2.59937	1.78549	2.85621	3.97498	2.17002	2.35705	0.09	0.24	0.06	-0.22	0.21	-0.36	0.32	-0.31	0.01	0.844741	0.606904	0.895228	0.636796	0.650225	0.443206	0.491535	0.510849	0.988252	1	1	1	1	1	1	1	1	0.99932
ENSG00000285053.1	AL357556.3	0	12	2.48983	2.43009	2.12588	1.92933	1.35777	1.1957	1.20982	1.23683	3.39802	3.84103	2.9426	3.12667	0.16	-0.11	-0.11	-0.17	-0.17	-0.22	-0.01	-0.11	0.28	0.762963	0.844262	0.837031	0.747484	0.756806	0.695503	0.980687	0.838179	0.601044	1	1	1	1	1	1	1	1	0.92118
ENSG00000287516.1	AL359764.2	0	12	2.984	2.36874	2.50188	1.98086	1.92204	1.83882	2.43145	1.64667	1.9117	2.38178	1.73068	1.71353	-0.16	-0.13	-0.34	-0.03	0.31	-0.3	0.13	-0.05	0.13	0.524385	0.618219	0.19041	0.909025	0.222094	0.290056	0.600478	0.860708	0.623637	1	1	0.897283	1	1	1	1	1	0.926444
ENSG00000286834.1	AL360020.1	0	12	17.6947	19.5043	20.8841	20.4283	9.76662	9.66039	12.1246	10.2825	14.2001	17.6917	11.296	11.0202	0.27	0.35	0.46	0.02	0.28	0.01	0.15	-0.24	-0.07	0.459269	0.3317	0.204617	0.962797	0.441259	0.973056	0.673115	0.512489	0.849959	1	1	0.909319	1	1	1	1	1	0.975532
ENSG00000235245.1	AL360181.2	0	12	2.06325	1.94786	1.6825	1.86859	1.5994	1.83529	1.62475	2.69107	1.67054	2.02537	1.80275	2.09182	0.14	-0.17	0.11	0.26	0.02	0.63	0.15	0.21	0.53	0.808376	0.771994	0.848329	0.658533	0.971476	0.298892	0.798287	0.715655	0.363113	1	1	1	1	1	1	1	1	NA
ENSG00000243960.1	AL390195.1	0	12	1.89396	1.74695	2.82083	2.58289	2.09751	2.09999	2.18788	2.30949	1.81926	2.3323	1.55099	2.22728	0.03	0.69	0.68	0.05	0.08	0.09	0.27	-0.07	0.68	0.960506	0.25997	0.264683	0.931231	0.892054	0.88825	0.663459	0.907652	0.265598	1	1	0.967692	1	1	1	1	1	NA
ENSG00000217801.10	AL390719.1	0	12	16.494	17.1428	14.0215	14.4556	12.17	15.3301	13.5283	19.0403	1.11014	1.70949	1.04924	1.08644	0.35	-0.1	0.04	0.36	0.15	0.56	0.44	0	0.13	0.747729	0.927048	0.970609	0.733941	0.885389	0.599997	0.684973	0.998984	0.907086	1	1	1	1	1	1	1	1	0.987672
ENSG00000272904.1	AL390726.2	0	12	4.6425	4.02037	5.08049	4.1833	5.56793	6.82049	7.47054	7.72557	3.72731	5.31994	3.32561	5.14713	-0.11	0.24	0.1	0.34	0.38	0.42	0.36	-0.08	0.68	0.855956	0.69103	0.867314	0.567071	0.517526	0.484732	0.549589	0.897342	0.256385	1	1	1	1	1	1	1	1	0.708462
ENSG00000227671.4	AL390728.4	0	12	23.254	19.4597	24.9816	21.6863	12.7887	13.2478	13.8483	12.1021	30.2097	34.7149	33.3797	29.629	-0.1	0.22	0.15	0.06	0.08	-0.11	0.03	0.24	0.26	0.679297	0.350921	0.53367	0.810387	0.721455	0.662517	0.891936	0.301732	0.271576	1	1	1	1	1	1	1	1	0.724274
ENSG00000259865.1	AL390728.6	0	12	6.30085	6.18886	6.19883	3.49719	3.791	4.14492	3.96472	4.58052	12.7147	10.6206	10.7521	5.87227	0.12	0.09	-0.61	0.12	0.04	0.06	-0.4	-0.15	-0.84	0.756123	0.809395	0.12407	0.754045	0.910578	0.879299	0.287216	0.685243	0.0270598	1	1	0.818752	1	1	1	1	1	0.243103
ENSG00000203364.2	AL390760.1	0	12	1.84337	2.32831	1.65603	1.29724	1.98249	1.60947	1.93207	1.07219	1.75561	2.9286	1.41511	1.81612	0.52	-0.02	-0.25	-0.27	-0.07	-0.67	0.53	-0.21	0.34	0.162124	0.960729	0.520393	0.459718	0.842804	0.128763	0.153675	0.575369	0.37274	1	1	1	1	1	1	1	1	NA
ENSG00000287277.1	AL392086.3	0	12	37.3398	41.4197	38.5034	23.5637	26.9154	26.2388	34.5126	25.9231	36.295	43.0822	24.6311	27.0626	0.27	0.16	-0.42	-0.01	0.33	-0.13	0.09	-0.51	-0.13	0.504412	0.694979	0.307122	0.98847	0.423301	0.759254	0.82294	0.215014	0.756811	1	1	0.985059	1	1	1	1	1	0.958782
ENSG00000233461.6	AL445524.1	0	12	11.4168	10.8687	9.5823	12.17	6.66658	5.32449	5.97123	6.26213	4.97786	8.32041	7.61815	7.91242	0.16	-0.12	0.34	-0.29	-0.18	-0.1	0.56	0.68	1	0.754902	0.81105	0.514351	0.576047	0.73193	0.846367	0.281577	0.19382	0.0543549	1	1	1	1	1	1	1	1	0.349594
ENSG00000240291.1	AL450384.2	0	12	2.44194	2.27493	2.24672	2.22013	2.26014	1.70671	2.15756	1.7517	1.95357	2.77879	1.88317	1.43483	0.06	0	0.11	-0.38	-0.1	-0.37	0.32	0.01	-0.18	0.846497	0.999228	0.729502	0.224191	0.742053	0.293594	0.298381	0.977861	0.573227	1	1	1	1	1	1	1	1	0.913274
ENSG00000272288.6	AL451165.2	0	12	4.04017	4.40422	4.1021	4.1267	2.69879	3.04814	2.58949	4.51346	5.05124	4.89586	4.26248	3.02758	0.4	0.16	0.28	0.19	-0.05	0.62	-0.19	-0.17	-0.39	0.659813	0.861036	0.75919	0.833253	0.957394	0.507914	0.835316	0.849341	0.670771	1	1	1	1	1	1	1	1	NA
ENSG00000280244.1	AL512356.3	0	12	2.49836	1.98099	1.70115	1.08955	1.52415	1.37747	1.59515	1.21582	2.00187	3.66563	2.17043	2.46081	-0.18	-0.44	-0.94	-0.13	0.02	-0.14	0.72	0.18	0.58	0.614233	0.22066	0.0106533	0.720821	0.947551	0.746151	0.041293	0.621231	0.0997999	1	1	0.305927	1	1	1	1	1	NA
ENSG00000234160.1	AL513165.1	0	12	5.69848	4.74211	5.83762	6.36953	3.66753	2.3299	2.61654	3.22971	2.94671	4.19948	5.24041	5.06318	-0.12	0.15	0.41	-0.62	-0.49	-0.16	0.33	0.95	1.12	0.789092	0.747623	0.361355	0.181131	0.286357	0.75012	0.481756	0.0391853	0.0153935	1	1	1	1	1	1	1	0.733743	NA
ENSG00000280665.1	AL513210.2	0	12	7.1159	7.30797	8.26669	5.82983	5.68758	4.78571	5.87582	3.79263	5.86822	8.5573	5.51577	7.20793	0.2	0.33	-0.05	-0.22	0.02	-0.47	0.36	-0.03	0.57	0.488904	0.250221	0.865583	0.438709	0.95282	0.171079	0.21037	0.926441	0.051769	1	1	1	1	1	1	1	1	NA
ENSG00000276997.4	AL513314.2	0	12	5.46211	4.70803	5.18306	4.14382	3.80193	3.75568	4.43392	3.40378	3.99614	5.48027	4.03255	4.77013	-0.06	0.04	-0.15	0	0.18	-0.21	0.29	0.12	0.55	0.836485	0.905676	0.633249	0.994983	0.565531	0.5309	0.352728	0.698204	0.0740921	1	1	1	1	1	1	1	1	0.406455
ENSG00000258314.3	AL589182.1	0	12	1.35538	1.11748	1.73563	2.38316	1.43593	1.32335	1.4373	2.38884	4.40617	7.31696	7.98023	7.3344	-0.21	0.46	1.07	-0.1	-0.04	0.62	0.61	0.93	0.73	0.901077	0.785893	0.527485	0.954534	0.979777	0.715589	0.7158	0.579686	0.66453	1	1	1	1	1	1	1	1	NA
ENSG00000286614.1	AL589182.3	0	12	4.48272	3.79957	4.86135	3.9692	2.02569	1.93394	2.50539	2.53926	3.88032	4.71953	3.39575	3.55775	-0.03	0.24	0.07	-0.02	0.27	0.28	0.11	-0.13	0.08	0.958878	0.649165	0.894956	0.9651	0.620167	0.611524	0.830744	0.807027	0.874258	1	1	1	1	1	1	1	1	0.981933
ENSG00000224848.2	AL589843.1	0	12	2.03346	1.55426	1.55821	1.24431	1.14595	1.17584	1.36854	1.20096	1.45313	1.81637	1.43073	1.61773	-0.22	-0.26	-0.46	0.07	0.23	0.04	0.14	0.07	0.46	0.415413	0.343504	0.0981339	0.81846	0.402557	0.90761	0.610664	0.811309	0.105105	1	1	0.767072	1	1	1	1	1	NA
ENSG00000225177.6	AL590617.2	0	12	23.2106	37.9799	31.3325	27.427	4.16622	3.43325	3.3102	2.58214	9.24647	6.31652	3.27595	1.31727	0.79	0.54	0.51	-0.24	-0.32	-0.7	-0.74	-1.39	-2.36	0.507242	0.653684	0.670513	0.83863	0.788969	0.564759	0.539379	0.245589	0.0493688	1	1	1	1	1	1	1	1	0.332108
ENSG00000286746.1	AL590807.1	0	12	6.69666	6.94705	6.65679	5.0774	3.99382	3.62245	4.80539	3.79971	6.03265	8.80796	4.77799	5.05955	0.18	0.1	-0.15	-0.11	0.24	-0.15	0.38	-0.25	0.02	0.613451	0.769449	0.677864	0.750801	0.500429	0.684935	0.285633	0.475452	0.966124	1	1	1	1	1	1	1	1	0.9958
ENSG00000213121.2	AL590867.1	0	12	8.52652	7.66326	7.97332	6.84348	7.18763	6.0497	8.36754	7.23556	8.78179	12.481	8.23224	7.06408	-0.02	0.02	-0.06	-0.23	0.18	-0.08	0.38	0.03	-0.05	0.957094	0.97029	0.879673	0.579836	0.662953	0.856562	0.364399	0.939863	0.910933	1	1	1	1	1	1	1	1	0.98859
ENSG00000233928.6	AL591501.1	0	12	3.71808	3.62415	4.15998	2.83238	3.08419	2.46686	3.67958	2.36703	3.21843	4.60451	2.43709	2.6886	0.08	0.28	-0.14	-0.31	0.22	-0.47	0.35	-0.3	0.02	0.827282	0.471657	0.709332	0.420519	0.559181	0.236019	0.355084	0.431545	0.952621	1	1	1	1	1	1	1	1	0.994608
ENSG00000203402.2	AL591503.1	0	12	11.4514	11.7406	9.82709	7.8203	8.17588	6.05387	8.7741	6.42472	11.3708	14.2484	10.2396	11.598	0.21	-0.1	-0.3	-0.4	0.07	-0.36	0.15	-0.07	0.24	0.554977	0.779164	0.40524	0.269711	0.834132	0.346554	0.669931	0.850964	0.491251	1	1	1	1	1	1	1	1	0.878448
ENSG00000267834.1	AL592211.1	0	12	9.75961	10.3497	9.51147	6.83377	6.97041	5.63217	6.78528	6.23708	9.01947	12.4383	8.20442	8.87511	0.25	0.08	-0.27	-0.28	-0.08	-0.22	0.28	-0.05	0.25	0.285789	0.730635	0.254894	0.240244	0.745086	0.416587	0.230322	0.845643	0.291197	1	1	0.962141	1	1	1	1	1	0.74043
ENSG00000288670.1	AL592295.6	0	12	2.56687	2.21531	2.80035	2.57165	2.23431	2.05723	2.70801	2.44635	1.66525	2.0406	1.9657	1.63421	-0.1	0.24	0.25	-0.09	0.25	0.07	0.13	0.35	0.21	0.835637	0.63108	0.604747	0.850051	0.607701	0.893852	0.78895	0.482034	0.677325	1	1	1	1	1	1	1	1	0.939431
ENSG00000230896.1	AL604028.1	0	12	1.66285	1.56285	1.74254	1.3865	1.41163	1.48638	1.48093	1.82258	2.1461	2.03451	2.05391	1.36242	0.08	0.18	-0.02	0.1	0.05	0.35	-0.22	0.04	-0.38	0.771747	0.532364	0.952815	0.716185	0.855648	0.294965	0.42227	0.898744	0.179572	1	1	1	1	1	1	1	1	NA
ENSG00000287064.1	AL606500.1	0	12	1.75369	1.83939	1.69704	1.66	1.76283	1.9359	1.79741	1.99057	2.94847	2.76574	3.11912	3.3919	0.2	0.07	0.17	0.16	-0.01	0.17	-0.23	0.18	0.38	0.734455	0.909141	0.774243	0.79426	0.989161	0.780124	0.699479	0.7573	0.524127	1	1	1	1	1	1	1	1	0.893371
ENSG00000269906.1	AL606834.1	0	12	6.22198	4.72185	4.57938	2.94402	2.4196	2.68585	3.08954	2.95196	2.94683	2.80723	2.56406	1.7813	-0.13	-0.31	-0.84	0.22	0.3	0.27	-0.24	-0.14	-0.49	0.880598	0.73106	0.347712	0.807694	0.734976	0.764889	0.787549	0.873808	0.585044	1	1	1	1	1	1	1	1	0.91584
ENSG00000282885.2	AL627171.2	0	12	1.67339	1.36933	1.87264	3.44138	3.33867	2.80721	3.86944	2.9357	3.98519	3.1269	7.34935	2.16522	-0.12	0.27	1.3	-0.26	0.19	-0.24	-0.44	0.99	-0.64	0.846916	0.653087	0.0314575	0.670339	0.752851	0.698561	0.46372	0.0966938	0.285064	1	1	0.512003	1	1	1	1	0.951761	0.734933
ENSG00000241860.7	AL627309.5	0	12	6.05851	6.44972	5.98561	4.56325	2.16681	1.74461	2.62386	1.93403	5.44409	5.90422	4.01347	4.78833	0.26	0.1	-0.16	-0.3	0.24	-0.16	-0.04	-0.36	0.1	0.271924	0.662567	0.502109	0.216611	0.323868	0.512457	0.874353	0.134725	0.688339	1	1	1	1	1	1	1	1	0.942735
ENSG00000272106.1	AL691432.2	0	12	1.92756	1.63468	1.21261	1.15919	1.44613	1.44425	1.22909	1.37356	1.93977	2.07755	1.8113	1.3735	0	-0.54	-0.48	0.05	-0.22	-0.12	-0.07	-0.01	-0.11	0.997291	0.432488	0.487733	0.942221	0.742592	0.862363	0.915919	0.982936	0.867456	1	1	1	1	1	1	1	1	0.980125
ENSG00000280249.1	AL691477.1	0	12	4.13004	4.53606	6.06052	5.73644	5.38291	6.35109	6.8504	4.12625	3.71814	10.0564	4.29862	5.31796	0.31	0.68	0.71	0.3	0.36	-0.07	1.25	0.36	0.8	0.607071	0.258909	0.239837	0.599352	0.534943	0.917224	0.0358006	0.564379	0.188872	1	1	0.947229	1	1	1	1	1	NA
ENSG00000227706.4	AL713998.1	0	12	5.66031	6.87808	5.64839	3.25249	4.23059	3.92969	4.65582	3.8853	6.04197	7.02747	3.85884	4.10077	0.4	0.11	-0.55	-0.06	0.12	-0.17	0.04	-0.61	-0.26	0.462046	0.834745	0.306693	0.915148	0.820285	0.761484	0.945349	0.258066	0.630593	1	1	0.984887	1	1	1	1	1	0.928116
ENSG00000249456.1	AL731577.2	0	12	5.79456	5.1563	4.35828	5.12706	4.87478	5.42509	4.46448	5.7432	4.92313	4.85878	5.3969	3.95843	0.04	-0.29	0.07	0.19	-0.12	0.13	-0.2	0.25	-0.11	0.943069	0.57526	0.889532	0.710146	0.820372	0.813454	0.704376	0.634819	0.825043	1	1	1	1	1	1	1	1	0.970676
ENSG00000237094.12	AL732372.2	0	12	12.6901	11.4907	12.1185	13.6107	11.216	7.66403	11.8645	9.73444	14.4037	19.834	12.3527	13.6933	-0.03	0.05	0.35	-0.51	0.06	-0.39	0.3	-0.1	0.19	0.956733	0.924061	0.48656	0.315845	0.899131	0.461113	0.554735	0.850893	0.70393	1	1	1	1	1	1	1	1	0.946217
ENSG00000257891.1	AL929601.1	0	12	16.7752	15.3821	21.4498	18.2515	16.391	17.7198	21.0801	20.3692	2.22404	3.63453	2.31432	3.47023	0.02	0.47	0.37	0.16	0.33	0.3	0.51	0.15	0.97	0.975111	0.377552	0.483552	0.766692	0.534036	0.583102	0.352283	0.791084	0.0780166	1	1	1	1	1	1	1	1	0.417572
ENSG00000258265.1	AL929601.2	0	12	15.8762	14.3339	16.5032	14.6159	10.4213	13.2046	17.0089	17.0187	2.68372	3.81489	3.00399	2.78997	0	0.17	0.13	0.38	0.66	0.63	0.35	0.25	0.37	0.999004	0.642712	0.721125	0.299825	0.0681979	0.0985598	0.380415	0.533307	0.358389	1	1	1	1	1	1	1	1	0.802487
ENSG00000287515.1	AL929602.1	0	12	1.05184	1.0061	1.4355	1.32096	1.44361	1.3305	2.50318	1.48059	3.55107	4.06222	2.61395	2.8301	0.17	0.57	0.58	-0.11	0.73	0.06	0.05	-0.38	-0.13	0.785798	0.3499	0.346796	0.862948	0.22879	0.923986	0.934756	0.534907	0.831667	1	1	1	1	1	1	1	1	0.972436
ENSG00000148218.16	ALAD	0	12	5.09204	4.4983	5.43767	5.20915	3.77186	3.67509	3.64928	4.05361	3.55723	4.00704	3.89676	4.45594	-0.03	0.21	0.29	-0.02	-0.05	0.04	-0.03	0.21	0.55	0.927363	0.443834	0.300513	0.936848	0.86114	0.878476	0.924619	0.457936	0.0480229	1	1	0.984856	1	1	1	1	1	0.328666
ENSG00000023330.15	ALAS1	0	12	32.0528	24.378	31.0432	29.3577	11.4975	10.7836	9.84274	12.2918	21.5193	21.1912	28.9225	26.9253	-0.19	0.08	0.12	-0.06	-0.23	0.03	-0.18	0.54	0.53	0.689372	0.868349	0.802486	0.890243	0.629846	0.942642	0.69293	0.244703	0.256651	1	1	1	1	1	1	1	1	0.708472
ENSG00000170017.12	ALCAM	0	12	8.92367	7.03222	7.06988	6.33966	24.8	29.7291	30.335	32.2471	88.8563	84.2539	53.0971	32.0851	-0.11	-0.21	-0.26	0.29	0.27	0.34	-0.25	-0.74	-1.12	0.887813	0.789265	0.739141	0.706838	0.73181	0.663422	0.749837	0.336358	0.146584	1	1	1	1	1	1	1	1	0.564595
ENSG00000161618.10	ALDH16A1	0	12	6.0728	5.28966	4.98178	5.54288	8.39904	6.42283	6.0638	6.94698	10.9053	11.2149	15.4511	12.8229	-0.03	-0.17	0.13	-0.36	-0.45	-0.35	-0.12	0.62	0.42	0.949273	0.753404	0.81518	0.502925	0.402183	0.517757	0.83041	0.252104	0.442761	1	1	1	1	1	1	1	1	0.855942
ENSG00000059573.9	ALDH18A1	0	12	33.66	29.4529	32.4332	29.8718	18.0851	18.39	16.5436	19.2045	40.0817	39.209	36.8572	30.6309	0	0.07	0.08	0.05	-0.13	0.03	-0.22	-0.07	-0.08	0.995852	0.795523	0.756567	0.837007	0.616148	0.918284	0.401568	0.802761	0.746978	1	1	1	1	1	1	1	1	0.958
ENSG00000111275.13	ALDH2	0	12	9.88228	8.93691	9.66278	8.44072	4.14499	3.78361	3.28164	3.78166	6.83776	5.96029	4.93935	4.15349	0.02	0.08	0.02	-0.09	-0.33	-0.18	-0.34	-0.35	-0.44	0.934886	0.780957	0.946893	0.773978	0.279792	0.562791	0.261797	0.253602	0.148492	1	1	1	1	1	1	1	1	0.567734
ENSG00000072210.19	ALDH3A2	0	12	37.8335	36.25	36.8013	33.8279	17.4916	18.5884	18.712	20.5507	52.8682	61.3527	105.957	84.277	0.13	0.08	0.08	0.12	0.1	0.17	0.07	1.13	0.82	0.839721	0.900342	0.898525	0.860905	0.880965	0.802183	0.914823	0.0875342	0.218477	1	1	1	1	1	1	1	0.91961	0.667653
ENSG00000006534.16	ALDH3B1	0	12	3.71935	2.90136	4.97137	4.69707	10.9465	13.1994	12.0567	15.0754	5.68234	6.0779	7.84692	5.61772	-0.16	0.54	0.57	0.28	0.14	0.39	-0.03	0.54	-0.02	0.911801	0.702541	0.684626	0.840399	0.922431	0.779658	0.983117	0.703933	0.991018	1	1	1	1	1	1	1	1	1
ENSG00000159423.17	ALDH4A1	0	12	2.34709	2.32531	2.6461	2.67754	1.56481	2.38524	2.31406	3.14511	6.17763	6.08421	8.97027	7.73902	0.13	0.28	0.45	0.6	0.54	0.94	-0.19	0.65	0.55	0.783516	0.53381	0.329321	0.188172	0.234162	0.0429213	0.68379	0.150779	0.230673	1	1	0.995428	1	1	1	1	1	0.682499
ENSG00000119711.13	ALDH6A1	0	12	6.64301	7.29327	6.6781	5.67759	4.44841	4.14234	4.04482	4.41246	10.7376	10.7703	6.61862	5.39547	0.28	0.12	0.03	-0.07	-0.14	-0.08	-0.14	-0.65	-0.76	0.394732	0.708634	0.935256	0.834998	0.667259	0.798399	0.663824	0.0467527	0.0188971	1	1	1	1	1	1	1	0.769421	0.206268
[truncated: 16,958 more rows]

## Sheet: DE
							Median expression													log2FC									p-value									adjusted p-avalue
[truncated: 439 more rows]
